# Supplementary material for: Zinc-mediated regulation of TMEM106B function in the endolysosomal pathway revealed through the systematic identification of TRIM2/3 ubiquitination substrates
Source: Research Square preprint supplement (doi:10.21203/rs.3.rs-5037938/v1), 2024-09-30
Supplement: Supplementary file 1 [file 0c3211bbf0fca6c0aa90710e.xlsx]

## Sheet: Description
Column name	Description
gene_name	Official gene symbol
protein_id	UniprotID
description	Full entry name and description
found.in.conditions	number of cell lines where the protein was found (maximum = 3)
found.in.reps	number of replicates where the protein was found (maximum = 2)
logFC	log2 fold-change (DKO vs. WT)
p_value	p-value calculated with LIMMA
fdr	false discovery rate calculated with LIMMA
comparison	cell line comparison
hit_annotation	A protein is considered a ‘hit’ if the fdr < 0.05 and a fold-change of at least 2-fold is observed. A protein is considered a ‘candidate’ if the fdr is smaller 0.2 and a fold change of at least 1.5-fold is observed.

## Sheet: mESC-neurons
Quantitative proteome profiling of mESC-derived neurons
mESCs were differentiated into glutamatergic neurons, and the proteome of each cell line (WT, DKO1, DKO2) quantified using TMT labeling at day 12 of the procedure.
gene_name	protein_id	description	found.in.conditions	found.in.reps	logFC	p_value	fdr	comparison	hit_annotation
Trim3	Q3TDT0|Q9R1R2	Tripartite motif-containing protein 3 OS=Mus musculus GN=Trim3 PE=1 SV=1|Tripartite motif-containing protein 3 OS=Mus musculus GN=Trim3 PE=1 SV=1	3	2	-2.06477	5.23547e-09	3.39625e-05	DKO_1 - WT	hit
Trim3	Q3TDT0|Q9R1R2	Tripartite motif-containing protein 3 OS=Mus musculus GN=Trim3 PE=1 SV=1|Tripartite motif-containing protein 3 OS=Mus musculus GN=Trim3 PE=1 SV=1	3	2	-1.75196	2.7144e-08	0.000176083	DKO_2 - WT	hit
Impa2	Q3U3B7|Q91UZ5	Inositol (Myo)-1(Or 4)-monophosphatase 2, isoform CRA_b OS=Mus musculus GN=Impa2 PE=1 SV=1|Inositol monophosphatase 2 OS=Mus musculus GN=Impa2 PE=1 SV=1	3	2	-1.53401	0.00479244	0.0901118	(DKO_1 - WT) - (DKO_2 - WT)	candidate
Cgn	D3YUW7|E9QMC1|P59242|P59242-2	Cingulin OS=Mus musculus GN=Cgn PE=1 SV=1|Cingulin OS=Mus musculus GN=Cgn PE=1 SV=1|Cingulin OS=Mus musculus GN=Cgn PE=1 SV=1|Isoform 2 of Cingulin OS=Mus musculus GN=Cgn	3	2	-1.33242	0.00322239	0.0653003	DKO_1 - WT	candidate
Cgn	D3YUW7|E9QMC1|P59242|P59242-2	Cingulin OS=Mus musculus GN=Cgn PE=1 SV=1|Cingulin OS=Mus musculus GN=Cgn PE=1 SV=1|Cingulin OS=Mus musculus GN=Cgn PE=1 SV=1|Isoform 2 of Cingulin OS=Mus musculus GN=Cgn	3	2	-1.2976	0.0038085	0.0807902	(DKO_1 - WT) - (DKO_2 - WT)	candidate
Itm2a	Q61500	Integral membrane protein 2A OS=Mus musculus GN=Itm2a PE=2 SV=2	3	2	-1.24946	2.2117e-06	0.00284921	DKO_1 - WT	hit
Impa2	Q3U3B7|Q91UZ5	Inositol (Myo)-1(Or 4)-monophosphatase 2, isoform CRA_b OS=Mus musculus GN=Impa2 PE=1 SV=1|Inositol monophosphatase 2 OS=Mus musculus GN=Impa2 PE=1 SV=1	3	2	-1.21128	0.0175511	0.165727	DKO_1 - WT	candidate
Slc35e2	Q8C811	Solute carrier family 35 member E2 OS=Mus musculus GN=Slc35e2 PE=2 SV=1	3	2	-1.19972	0.000150303	0.0195254	(DKO_1 - WT) - (DKO_2 - WT)	hit
Slc35e2	Q8C811	Solute carrier family 35 member E2 OS=Mus musculus GN=Slc35e2 PE=2 SV=1	3	2	-1.19862	0.000151418	0.0110436	DKO_1 - WT	hit
Ackr3	P56485	Atypical chemokine receptor 3 OS=Mus musculus GN=Ackr3 PE=1 SV=2	3	2	-1.16834	2.26044e-06	0.00284921	DKO_1 - WT	hit
Pcolce	Q3UIP2|Q61398	Procollagen C-endopeptidase enhancer 1 OS=Mus musculus GN=Pcolce PE=1 SV=1|Procollagen C-endopeptidase enhancer 1 OS=Mus musculus GN=Pcolce PE=1 SV=2	3	2	-1.12412	6.07339e-07	0.00154644	DKO_1 - WT	hit
Trit1	Q80UN9|Q80UN9-2	tRNA dimethylallyltransferase, mitochondrial OS=Mus musculus GN=Trit1 PE=2 SV=2|Isoform 2 of tRNA dimethylallyltransferase, mitochondrial OS=Mus musculus GN=Trit1	3	2	-1.1019	0.00880613	0.115638	DKO_1 - WT	candidate
Cubn	Q9JLB4	Cubilin OS=Mus musculus GN=Cubn PE=1 SV=3	3	2	-1.07437	1.6879e-05	0.023552	DKO_2 - WT	hit
Nfic	P70255|P70255-2|P70255-3|P70255-4|P70255-5	Nuclear factor 1 C-type OS=Mus musculus GN=Nfic PE=1 SV=1|Isoform 2 of Nuclear factor 1 C-type OS=Mus musculus GN=Nfic|Isoform 3 of Nuclear factor 1 C-type OS=Mus musculus GN=Nfic|Isoform 4 of Nuclear factor 1 C-type OS=Mus musculus GN=Nfic|Isoform 5 of Nuclear factor 1 C-type OS=Mus musculus GN=Nfic	3	2	-1.06796	7.15173e-07	0.00154644	DKO_1 - WT	hit
Lrp1b	A2API5|Q9JI18	Low-density lipoprotein receptor-related protein 1B OS=Mus musculus GN=Lrp1b PE=1 SV=2|Low-density lipoprotein receptor-related protein 1B OS=Mus musculus GN=Lrp1b PE=1 SV=1	3	2	-1.06756	0.00023413	0.0142573	DKO_1 - WT	hit
Vcam1	P29533|Q3UPN1	Vascular cell adhesion protein 1 OS=Mus musculus GN=Vcam1 PE=1 SV=1|Vascular cell adhesion protein 1 OS=Mus musculus GN=Vcam1 PE=1 SV=1	3	2	-1.0665	4.31208e-06	0.00338511	DKO_1 - WT	hit
Trit1	Q80UN9|Q80UN9-2	tRNA dimethylallyltransferase, mitochondrial OS=Mus musculus GN=Trit1 PE=2 SV=2|Isoform 2 of tRNA dimethylallyltransferase, mitochondrial OS=Mus musculus GN=Trit1	3	2	-1.06006	0.0108818	0.132191	(DKO_1 - WT) - (DKO_2 - WT)	candidate
Igfbp3	P47878	Insulin-like growth factor-binding protein 3 OS=Mus musculus GN=Igfbp3 PE=2 SV=2	3	2	-1.0505	1.86993e-06	0.0040909	(DKO_1 - WT) - (DKO_2 - WT)	hit
Aspn	A6H6K1|Q99MQ4	Aspn protein OS=Mus musculus GN=Aspn PE=1 SV=1|Asporin OS=Mus musculus GN=Aspn PE=1 SV=1	3	2	-1.03767	0.000646548	0.036253	(DKO_1 - WT) - (DKO_2 - WT)	hit
Svil	E9Q3Z5|Q8K4L3|Q8K4L3-3	Supervillin OS=Mus musculus GN=Svil PE=1 SV=1|Supervillin OS=Mus musculus GN=Svil PE=1 SV=1|Isoform 2 of Supervillin OS=Mus musculus GN=Svil	3	2	-1.01354	4.69647e-06	0.00338511	DKO_1 - WT	hit
Tgfbr2	Q62312|Q62312-2	TGF-beta receptor type-2 OS=Mus musculus GN=Tgfbr2 PE=1 SV=1|Isoform RII-1 of TGF-beta receptor type-2 OS=Mus musculus GN=Tgfbr2	3	2	-1.01329	1.62594e-05	0.0058597	DKO_1 - WT	hit
Aspn	A6H6K1|Q99MQ4	Aspn protein OS=Mus musculus GN=Aspn PE=1 SV=1|Asporin OS=Mus musculus GN=Aspn PE=1 SV=1	3	2	-1.0122	0.000776328	0.0281343	DKO_1 - WT	hit
Tmem176b	Q9R1Q6	Transmembrane protein 176B OS=Mus musculus GN=Tmem176b PE=1 SV=1	3	2	-1.0054	2.96029e-05	0.0061434	DKO_1 - WT	hit
Emilin3	A2A4B4|P59900	EMILIN-3 OS=Mus musculus GN=Emilin3 PE=4 SV=1|EMILIN-3 OS=Mus musculus GN=Emilin3 PE=2 SV=1	3	2	-0.993689	0.000144109	0.0110436	DKO_1 - WT	candidate
Tmem119	Q8R138	Transmembrane protein 119 OS=Mus musculus GN=Tmem119 PE=1 SV=1	3	2	-0.991052	3.40461e-05	0.0061434	DKO_1 - WT	candidate
Sparc	P07214|Q5NCU4|Q5NCU5	SPARC OS=Mus musculus GN=Sparc PE=1 SV=1|SPARC OS=Mus musculus GN=Sparc PE=1 SV=1|SPARC OS=Mus musculus GN=Sparc PE=1 SV=1	3	2	-0.983777	0.000118156	0.0107945	DKO_1 - WT	candidate
Bnc1	F8VPY0|O35914	Zinc finger protein basonuclin-1 OS=Mus musculus GN=Bnc1 PE=4 SV=1|Zinc finger protein basonuclin-1 OS=Mus musculus GN=Bnc1 PE=1 SV=1	3	2	-0.9824	0.000137063	0.0186511	(DKO_1 - WT) - (DKO_2 - WT)	candidate
Col1a1	P11087	Collagen alpha-1(I) chain OS=Mus musculus GN=Col1a1 PE=1 SV=4	3	2	-0.980126	0.000642074	0.0248376	DKO_1 - WT	candidate
Rdh10	Q8VCH7	Retinol dehydrogenase 10 OS=Mus musculus GN=Rdh10 PE=1 SV=2	3	2	-0.980111	3.47988e-05	0.0115079	(DKO_1 - WT) - (DKO_2 - WT)	candidate
Cav1	P49817	Caveolin-1 OS=Mus musculus GN=Cav1 PE=1 SV=1	3	2	-0.959017	1.62104e-06	0.0040909	(DKO_1 - WT) - (DKO_2 - WT)	candidate
Laptm4a	E9QLR3|Q60961	Lysosomal-associated transmembrane protein 4A OS=Mus musculus GN=Laptm4a PE=1 SV=1|Lysosomal-associated transmembrane protein 4A OS=Mus musculus GN=Laptm4a PE=1 SV=1	3	2	-0.949354	0.00012813	0.0107945	DKO_1 - WT	candidate
Sema5a	Q3UPZ0|Q62217	Sema domain, seven thrombospondin repeats (Type 1 and type 1-like), transmembrane domain (TM) and short cytoplasmic domain, (Semaphorin) 5A, isoform CRA_a OS=Mus musculus GN=Sema5a PE=1 SV=1|Semaphorin-5A OS=Mus musculus GN=Sema5a PE=2 SV=1	3	2	-0.943967	7.2302e-06	0.0234512	DKO_2 - WT	candidate
Itga9	B8JK39	Integrin alpha-9 OS=Mus musculus GN=Itga9 PE=1 SV=1	3	2	-0.94117	3.20382e-06	0.00296902	DKO_1 - WT	candidate
Pdgfra	P26618	Platelet-derived growth factor receptor alpha OS=Mus musculus GN=Pdgfra PE=1 SV=3	3	2	-0.9235	1.00951e-05	0.00467763	DKO_1 - WT	candidate
Prrx1	G3UZ44|P63013|P63013-2	Paired mesoderm homeobox protein 1 OS=Mus musculus GN=Prrx1 PE=1 SV=1|Paired mesoderm homeobox protein 1 OS=Mus musculus GN=Prrx1 PE=1 SV=1|Isoform 2 of Paired mesoderm homeobox protein 1 OS=Mus musculus GN=Prrx1	3	2	-0.920314	2.47173e-05	0.0061434	DKO_1 - WT	candidate
Trim41	Q5NCC3	E3 ubiquitin-protein ligase TRIM41 OS=Mus musculus GN=Trim41 PE=1 SV=1	3	2	-0.917541	0.00191548	0.0479756	DKO_1 - WT	candidate
Dtl	Q3TLR7|Q3TLR7-2	Denticleless protein homolog OS=Mus musculus GN=Dtl PE=1 SV=2|Isoform 2 of Denticleless protein homolog OS=Mus musculus GN=Dtl	3	2	-0.912091	0.00804506	0.11513	(DKO_1 - WT) - (DKO_2 - WT)	candidate
Cav1	P49817	Caveolin-1 OS=Mus musculus GN=Cav1 PE=1 SV=1	3	2	-0.910644	2.63531e-06	0.00284921	DKO_1 - WT	candidate
Myrf	Q3UR85|Q3UR85-2|Q3UR85-3|Q3UR85-5	Myelin regulatory factor OS=Mus musculus GN=Myrf PE=1 SV=2|Isoform 2 of Myelin regulatory factor OS=Mus musculus GN=Myrf|Isoform 3 of Myelin regulatory factor OS=Mus musculus GN=Myrf|Isoform 4 of Myelin regulatory factor OS=Mus musculus GN=Myrf	3	2	-0.901974	2.99588e-05	0.0114319	(DKO_1 - WT) - (DKO_2 - WT)	candidate
Pcdh18	Q8VHR0	Protocadherin 18 OS=Mus musculus GN=Pcdh18 PE=1 SV=2	3	2	-0.89122	3.48441e-05	0.0061434	DKO_1 - WT	candidate
Ahnak	E9Q616	Protein Ahnak OS=Mus musculus GN=Ahnak PE=1 SV=1	3	2	-0.89004	0.000441706	0.0204501	DKO_1 - WT	candidate
Lrp1b	A2API5|Q9JI18	Low-density lipoprotein receptor-related protein 1B OS=Mus musculus GN=Lrp1b PE=1 SV=2|Low-density lipoprotein receptor-related protein 1B OS=Mus musculus GN=Lrp1b PE=1 SV=1	3	2	-0.885175	0.000965892	0.0443812	(DKO_1 - WT) - (DKO_2 - WT)	candidate
Ptrf	O54724	Polymerase I and transcript release factor OS=Mus musculus GN=Ptrf PE=1 SV=1	3	2	-0.87731	5.04207e-06	0.00523606	(DKO_1 - WT) - (DKO_2 - WT)	candidate
Npr3	P70180	Atrial natriuretic peptide receptor 3 OS=Mus musculus GN=Npr3 PE=1 SV=3	3	2	-0.874395	6.04791e-06	0.0037106	DKO_1 - WT	candidate
Svil	E9Q3Z5|Q8K4L3|Q8K4L3-3	Supervillin OS=Mus musculus GN=Svil PE=1 SV=1|Supervillin OS=Mus musculus GN=Svil PE=1 SV=1|Isoform 2 of Supervillin OS=Mus musculus GN=Svil	3	2	-0.872257	1.82787e-05	0.00843574	(DKO_1 - WT) - (DKO_2 - WT)	candidate
Ttn	A2ASS6	Titin OS=Mus musculus GN=Ttn PE=1 SV=1	3	2	-0.871743	0.00535946	0.0955379	(DKO_1 - WT) - (DKO_2 - WT)	candidate
Trmt11	E9QKG3|Q9CWH5	tRNA (guanine(10)-N2)-methyltransferase homolog OS=Mus musculus GN=Trmt11 PE=1 SV=1|tRNA (guanine(10)-N2)-methyltransferase homolog OS=Mus musculus GN=Trmt11 PE=1 SV=1	3	2	-0.871467	0.000639468	0.0248376	DKO_1 - WT	candidate
Lpl	P11152	Lipoprotein lipase OS=Mus musculus GN=Lpl PE=1 SV=3	3	2	-0.868655	3.99574e-06	0.00518407	(DKO_1 - WT) - (DKO_2 - WT)	candidate
Ttn	A2ASS6	Titin OS=Mus musculus GN=Ttn PE=1 SV=1	3	2	-0.863882	0.00565671	0.0898922	DKO_1 - WT	candidate
Igfbp3	P47878	Insulin-like growth factor-binding protein 3 OS=Mus musculus GN=Igfbp3 PE=2 SV=2	3	2	-0.859387	1.18865e-05	0.00482889	DKO_1 - WT	candidate
Rab32	Q0PD23|Q9CZE3	RAB32, member RAS oncogene family OS=Mus musculus GN=Rab32 PE=1 SV=1|Ras-related protein Rab-32 OS=Mus musculus GN=Rab32 PE=1 SV=3	3	2	-0.856283	1.19103e-05	0.00482889	DKO_1 - WT	candidate
Tgfbr3	A0A0R4J097	Transforming growth factor beta receptor type 3 OS=Mus musculus GN=Tgfbr3 PE=1 SV=1	3	2	-0.854653	1.78767e-05	0.00610348	DKO_1 - WT	candidate
Enpep	P16406|Q52JJ6	Glutamyl aminopeptidase OS=Mus musculus GN=Enpep PE=1 SV=1|Aminopeptidase A OS=Mus musculus GN=Enpep PE=1 SV=1	3	2	-0.853957	4.54493e-05	0.00668551	DKO_1 - WT	candidate
Itm2c	A0A087WRM2|Q91VK4	Integral membrane protein 2C OS=Mus musculus GN=Itm2c PE=1 SV=1|Integral membrane protein 2C OS=Mus musculus GN=Itm2c PE=1 SV=2	3	2	-0.846667	0.000106956	0.0105125	DKO_1 - WT	candidate
Dlk1	Q09163|Q925U3	Protein delta homolog 1 OS=Mus musculus GN=Dlk1 PE=1 SV=1|Delta-like OS=Mus musculus GN=Dlk1 PE=1 SV=1	3	2	-0.84602	0.00140665	0.0398468	DKO_1 - WT	candidate
Reck	Q9Z0J1	Reversion-inducing cysteine-rich protein with Kazal motifs OS=Mus musculus GN=Reck PE=1 SV=2	3	2	-0.845793	3.29992e-05	0.0061434	DKO_1 - WT	candidate
Trmt11	E9QKG3|Q9CWH5	tRNA (guanine(10)-N2)-methyltransferase homolog OS=Mus musculus GN=Trmt11 PE=1 SV=1|tRNA (guanine(10)-N2)-methyltransferase homolog OS=Mus musculus GN=Trmt11 PE=1 SV=1	3	2	-0.845318	0.000800061	0.0386687	(DKO_1 - WT) - (DKO_2 - WT)	candidate
Ggcx	B2RS80|Q9QYC7	Gamma-glutamyl carboxylase OS=Mus musculus GN=Ggcx PE=1 SV=1|Vitamin K-dependent gamma-carboxylase OS=Mus musculus GN=Ggcx PE=1 SV=1	3	2	-0.844854	5.88252e-05	0.00706665	DKO_1 - WT	candidate
Mcam	Q8R2Y2	Cell surface glycoprotein MUC18 OS=Mus musculus GN=Mcam PE=1 SV=1	3	2	-0.840954	2.48052e-05	0.0061434	DKO_1 - WT	candidate
Gmds	Q8K0C9	GDP-mannose 4,6 dehydratase OS=Mus musculus GN=Gmds PE=1 SV=1	3	2	-0.838136	0.000781977	0.0386687	(DKO_1 - WT) - (DKO_2 - WT)	candidate
Trim2	E9QKC6|Q3UHH4|Q9ESN6	Tripartite motif-containing protein 2 OS=Mus musculus GN=Trim2 PE=1 SV=1|Tripartite motif-containing protein 2 OS=Mus musculus GN=Trim2 PE=1 SV=1|Tripartite motif-containing protein 2 OS=Mus musculus GN=Trim2 PE=1 SV=1	3	2	-0.837448	7.00373e-06	0.0037861	DKO_1 - WT	candidate
Pcolce	Q3UIP2|Q61398	Procollagen C-endopeptidase enhancer 1 OS=Mus musculus GN=Pcolce PE=1 SV=1|Procollagen C-endopeptidase enhancer 1 OS=Mus musculus GN=Pcolce PE=1 SV=2	3	2	-0.837387	9.51869e-06	0.0073648	(DKO_1 - WT) - (DKO_2 - WT)	candidate
Pgm5	Q8BZF8	Phosphoglucomutase-like protein 5 OS=Mus musculus GN=Pgm5 PE=1 SV=2	3	2	-0.835709	2.6978e-05	0.0061434	DKO_1 - WT	candidate
Col14a1	B7ZNH7|K3W4R4|Q80X19|Q80X19-2	Collagen alpha-1(XIV) chain OS=Mus musculus GN=Col14a1 PE=1 SV=1|Collagen alpha-1(XIV) chain OS=Mus musculus GN=Col14a1 PE=1 SV=1|Collagen alpha-1(XIV) chain OS=Mus musculus GN=Col14a1 PE=1 SV=2|Isoform 2 of Collagen alpha-1(XIV) chain OS=Mus musculus GN=Col14a1	3	2	-0.833436	5.65013e-06	0.00523606	(DKO_1 - WT) - (DKO_2 - WT)	candidate
Gulp1	Q8K2A1	PTB domain-containing engulfment adapter protein 1 OS=Mus musculus GN=Gulp1 PE=1 SV=1	3	2	-0.832667	6.29206e-06	0.0037106	DKO_1 - WT	candidate
Parm1	Q923D3	Prostate androgen-regulated mucin-like protein 1 homolog OS=Mus musculus GN=Parm1 PE=1 SV=1	3	2	-0.82722	0.000234413	0.0142573	DKO_1 - WT	candidate
Pdgfrb	E9QN12|E9QPE2|P05622	Platelet-derived growth factor receptor beta OS=Mus musculus GN=Pdgfrb PE=1 SV=1|Platelet-derived growth factor receptor beta OS=Mus musculus GN=Pdgfrb PE=1 SV=1|Platelet-derived growth factor receptor beta OS=Mus musculus GN=Pdgfrb PE=1 SV=1	3	2	-0.827184	5.50615e-05	0.00703924	DKO_1 - WT	candidate
LRWD1	Q8BUI3	Leucine-rich repeat and WD repeat-containing protein 1 OS=Mus musculus GN=LRWD1 PE=2 SV=1	3	2	-0.82704	0.000976572	0.0323179	DKO_1 - WT	candidate
Laptm4a	E9QLR3|Q60961	Lysosomal-associated transmembrane protein 4A OS=Mus musculus GN=Laptm4a PE=1 SV=1|Lysosomal-associated transmembrane protein 4A OS=Mus musculus GN=Laptm4a PE=1 SV=1	3	2	-0.82147	0.000403887	0.03318	(DKO_1 - WT) - (DKO_2 - WT)	candidate
Cdh11	P55288	Cadherin-11 OS=Mus musculus GN=Cdh11 PE=1 SV=1	3	2	-0.820048	3.05154e-05	0.0061434	DKO_1 - WT	candidate
Ptrf	O54724	Polymerase I and transcript release factor OS=Mus musculus GN=Ptrf PE=1 SV=1	3	2	-0.815183	9.85438e-06	0.00467763	DKO_1 - WT	candidate
Emilin3	A2A4B4|P59900	EMILIN-3 OS=Mus musculus GN=Emilin3 PE=4 SV=1|EMILIN-3 OS=Mus musculus GN=Emilin3 PE=2 SV=1	3	2	-0.814485	0.00067668	0.036253	(DKO_1 - WT) - (DKO_2 - WT)	candidate
Wnt11	P48615|Q059Y4	Protein Wnt-11 OS=Mus musculus GN=Wnt11 PE=2 SV=1|Protein Wnt OS=Mus musculus GN=Wnt11 PE=1 SV=1	3	2	-0.812805	2.72845e-05	0.0061434	DKO_1 - WT	candidate
Manba	A0A0R4J092|Q8K2I4	Beta-mannosidase OS=Mus musculus GN=Manba PE=1 SV=1|Beta-mannosidase OS=Mus musculus GN=Manba PE=1 SV=1	3	2	-0.808818	0.000910972	0.0431349	(DKO_1 - WT) - (DKO_2 - WT)	candidate
Mmp14	P53690	Matrix metalloproteinase-14 OS=Mus musculus GN=Mmp14 PE=2 SV=3	3	2	-0.806642	3.59872e-05	0.0061434	DKO_1 - WT	candidate
Nars2	Q8BGV0	Probable asparagine--tRNA ligase, mitochondrial OS=Mus musculus GN=Nars2 PE=1 SV=1	3	2	-0.806024	0.000177247	0.0958168	DKO_2 - WT	candidate
Col1a2	Q01149|Q3TX57	Collagen alpha-2(I) chain OS=Mus musculus GN=Col1a2 PE=1 SV=2|Collagen alpha-2(I) chain OS=Mus musculus GN=Col1a2 PE=1 SV=1	3	2	-0.802303	0.00110373	0.0348148	DKO_1 - WT	candidate
Epha3	Q8BRB1	Eph receptor A3 OS=Mus musculus GN=Epha3 PE=1 SV=1	3	2	-0.800732	5.16716e-05	0.00698321	DKO_1 - WT	candidate
Trim41	Q5NCC3	E3 ubiquitin-protein ligase TRIM41 OS=Mus musculus GN=Trim41 PE=1 SV=1	3	2	-0.799783	0.00462856	0.0884248	(DKO_1 - WT) - (DKO_2 - WT)	candidate
Lima1	Q9ERG0	LIM domain and actin-binding protein 1 OS=Mus musculus GN=Lima1 PE=1 SV=3	3	2	-0.799028	2.92372e-05	0.0061434	DKO_1 - WT	candidate
Myo16	F8WGF8|Q5DU14|Q5DU14-2|Q5DU14-3	Unconventional myosin-XVI OS=Mus musculus GN=Myo16 PE=1 SV=1|Unconventional myosin-XVI OS=Mus musculus GN=Myo16 PE=1 SV=2|Isoform 2 of Unconventional myosin-XVI OS=Mus musculus GN=Myo16|Isoform 3 of Unconventional myosin-XVI OS=Mus musculus GN=Myo16	3	2	-0.795177	0.00153028	0.0416372	DKO_1 - WT	candidate
Col3a1	P08121|Q3TVI5	Collagen alpha-1(III) chain OS=Mus musculus GN=Col3a1 PE=1 SV=4|Collagen alpha-1(III) chain OS=Mus musculus GN=Col3a1 PE=1 SV=1	3	2	-0.793951	0.000203238	0.013184	DKO_1 - WT	candidate
Nfib	A2BG75|A2BG76|A2BG77|I7HIP8|P97863|P97863-2|P97863-3	Nuclear factor 1 OS=Mus musculus GN=Nfib PE=1 SV=1|Nuclear factor 1 OS=Mus musculus GN=Nfib PE=1 SV=1|Nuclear factor 1 OS=Mus musculus GN=Nfib PE=1 SV=1|Nuclear factor 1 OS=Mus musculus GN=Nfib PE=1 SV=1|Nuclear factor 1 B-type OS=Mus musculus GN=Nfib PE=1 SV=2|Isoform 2 of Nuclear factor 1 B-type OS=Mus musculus GN=Nfib|Isoform 3 of Nuclear factor 1 B-type OS=Mus musculus GN=Nfib	3	2	-0.785092	1.51407e-05	0.00577753	DKO_1 - WT	candidate
Rdh10	Q8VCH7	Retinol dehydrogenase 10 OS=Mus musculus GN=Rdh10 PE=1 SV=2	3	2	-0.773756	0.000247944	0.0144061	DKO_1 - WT	candidate
Samd4a	Q8CBY1-4	Isoform 4 of Protein Smaug homolog 1 OS=Mus musculus GN=Samd4a	3	2	-0.772046	7.2287e-05	0.0135478	(DKO_1 - WT) - (DKO_2 - WT)	candidate
Myo16	F8WGF8|Q5DU14|Q5DU14-2|Q5DU14-3	Unconventional myosin-XVI OS=Mus musculus GN=Myo16 PE=1 SV=1|Unconventional myosin-XVI OS=Mus musculus GN=Myo16 PE=1 SV=2|Isoform 2 of Unconventional myosin-XVI OS=Mus musculus GN=Myo16|Isoform 3 of Unconventional myosin-XVI OS=Mus musculus GN=Myo16	3	2	-0.771941	0.0018736	0.0571346	(DKO_1 - WT) - (DKO_2 - WT)	candidate
Tpm2	P58774	Tropomyosin beta chain OS=Mus musculus GN=Tpm2 PE=1 SV=1	3	2	-0.770757	0.000651488	0.036253	(DKO_1 - WT) - (DKO_2 - WT)	candidate
Lpp	Q8BFW7	Lipoma-preferred partner homolog OS=Mus musculus GN=Lpp PE=1 SV=1	3	2	-0.770416	0.00035981	0.0179545	DKO_1 - WT	candidate
Ggcx	B2RS80|Q9QYC7	Gamma-glutamyl carboxylase OS=Mus musculus GN=Ggcx PE=1 SV=1|Vitamin K-dependent gamma-carboxylase OS=Mus musculus GN=Ggcx PE=1 SV=1	3	2	-0.767854	0.000130569	0.0186511	(DKO_1 - WT) - (DKO_2 - WT)	candidate
Ankrd13c	Q3UX43	Ankyrin repeat domain-containing protein 13C OS=Mus musculus GN=Ankrd13c PE=1 SV=2	3	2	-0.764645	0.000270216	0.0261354	(DKO_1 - WT) - (DKO_2 - WT)	candidate
Dkk2	Q9QYZ8	Dickkopf-related protein 2 OS=Mus musculus GN=Dkk2 PE=1 SV=2	3	2	-0.763432	2.88832e-05	0.0061434	DKO_1 - WT	candidate
Ahnak2	E9PYB0|F7DBB3	Protein Ahnak2 (Fragment) OS=Mus musculus GN=Ahnak2 PE=1 SV=7|Protein Ahnak2 (Fragment) OS=Mus musculus GN=Ahnak2 PE=1 SV=1	3	2	-0.762951	0.00505909	0.0841496	DKO_1 - WT	candidate
Cd248	Q91V98	Endosialin OS=Mus musculus GN=Cd248 PE=1 SV=1	3	2	-0.761112	6.07591e-05	0.00716625	DKO_1 - WT	candidate
Dtl	Q3TLR7|Q3TLR7-2	Denticleless protein homolog OS=Mus musculus GN=Dtl PE=1 SV=2|Isoform 2 of Denticleless protein homolog OS=Mus musculus GN=Dtl	3	2	-0.757933	0.0210258	0.183469	DKO_1 - WT	candidate
Ltbp1	Q8CG19	Latent-transforming growth factor beta-binding protein 1 OS=Mus musculus GN=Ltbp1 PE=1 SV=2	3	2	-0.754244	4.84383e-05	0.00668551	DKO_1 - WT	candidate
Col16a1	E9Q0X4|Q8BLX7	Collagen alpha-1(XVI) chain OS=Mus musculus GN=Col16a1 PE=1 SV=1|Collagen alpha-1(XVI) chain OS=Mus musculus GN=Col16a1 PE=1 SV=2	3	2	-0.753502	4.53872e-05	0.00668551	DKO_1 - WT	candidate
Icam1	P13597|P13597-2	Intercellular adhesion molecule 1 OS=Mus musculus GN=Icam1 PE=1 SV=1|Isoform 2 of Intercellular adhesion molecule 1 OS=Mus musculus GN=Icam1	3	2	-0.751992	0.000153153	0.0110436	DKO_1 - WT	candidate
Dab2	A0A0R4J104|E9QL31|P98078|P98078-2	Disabled homolog 2 OS=Mus musculus GN=Dab2 PE=1 SV=1|Disabled homolog 2 OS=Mus musculus GN=Dab2 PE=1 SV=1|Disabled homolog 2 OS=Mus musculus GN=Dab2 PE=1 SV=2|Isoform p93 of Disabled homolog 2 OS=Mus musculus GN=Dab2	3	2	-0.749086	2.70843e-05	0.0061434	DKO_1 - WT	candidate
Rab32	Q0PD23|Q9CZE3	RAB32, member RAS oncogene family OS=Mus musculus GN=Rab32 PE=1 SV=1|Ras-related protein Rab-32 OS=Mus musculus GN=Rab32 PE=1 SV=3	3	2	-0.746018	4.01482e-05	0.0118382	(DKO_1 - WT) - (DKO_2 - WT)	candidate
Ephb4	P54761|Q8C8K1	Ephrin type-B receptor 4 OS=Mus musculus GN=Ephb4 PE=1 SV=2|Ephrin type-B receptor 4 OS=Mus musculus GN=Ephb4 PE=1 SV=1	3	2	-0.744503	1.9673e-05	0.0061434	DKO_1 - WT	candidate
Il6st	Q00560|V9GX00	Interleukin-6 receptor subunit beta OS=Mus musculus GN=Il6st PE=1 SV=2|Interleukin-6 receptor subunit beta OS=Mus musculus GN=Il6st PE=1 SV=1	3	2	-0.742515	7.99726e-05	0.00850463	DKO_1 - WT	candidate
Lmo7	E9PYF4|E9PYI7|F6TFN2|F6VG99	Protein Lmo7 OS=Mus musculus GN=Lmo7 PE=1 SV=1|Protein Lmo7 OS=Mus musculus GN=Lmo7 PE=1 SV=1|Protein Lmo7 (Fragment) OS=Mus musculus GN=Lmo7 PE=1 SV=1|Protein Lmo7 (Fragment) OS=Mus musculus GN=Lmo7 PE=1 SV=1	3	2	-0.742392	6.90416e-05	0.00785742	DKO_1 - WT	candidate
Slit3	Q9WVB4	Slit homolog 3 protein OS=Mus musculus GN=Slit3 PE=2 SV=2	3	2	-0.742323	4.75818e-05	0.00668551	DKO_1 - WT	candidate
Flrt2	Q8BLU0	Leucine-rich repeat transmembrane protein FLRT2 OS=Mus musculus GN=Flrt2 PE=1 SV=1	3	2	-0.738641	4.43378e-05	0.00668551	DKO_1 - WT	candidate
Arhgef17	Q80U35	Rho guanine nucleotide exchange factor 17 OS=Mus musculus GN=Arhgef17 PE=1 SV=2	3	2	-0.73781	4.88877e-05	0.012216	(DKO_1 - WT) - (DKO_2 - WT)	candidate
LRWD1	Q8BUI3	Leucine-rich repeat and WD repeat-containing protein 1 OS=Mus musculus GN=LRWD1 PE=2 SV=1	3	2	-0.733991	0.0022277	0.0631052	(DKO_1 - WT) - (DKO_2 - WT)	candidate
Hmga2	P52927|Q6NSP9	High mobility group protein HMGI-C OS=Mus musculus GN=Hmga2 PE=1 SV=1|High mobility group protein HMGI-C OS=Mus musculus GN=Hmga2 PE=1 SV=1	3	2	-0.73021	4.18475e-05	0.00668551	DKO_1 - WT	candidate
Col12a1	F6WIM8|Q60847|Q60847-2|Q60847-5	Collagen alpha-1(XII) chain (Fragment) OS=Mus musculus GN=Col12a1 PE=1 SV=1|Collagen alpha-1(XII) chain OS=Mus musculus GN=Col12a1 PE=2 SV=3|Isoform 2 of Collagen alpha-1(XII) chain OS=Mus musculus GN=Col12a1|Isoform 5 of Collagen alpha-1(XII) chain OS=Mus musculus GN=Col12a1	3	2	-0.729029	3.22086e-05	0.0061434	DKO_1 - WT	candidate
Hmga2	P52927|Q6NSP9	High mobility group protein HMGI-C OS=Mus musculus GN=Hmga2 PE=1 SV=1|High mobility group protein HMGI-C OS=Mus musculus GN=Hmga2 PE=1 SV=1	3	2	-0.728066	4.29204e-05	0.0121054	(DKO_1 - WT) - (DKO_2 - WT)	candidate
Itm2a	Q61500	Integral membrane protein 2A OS=Mus musculus GN=Itm2a PE=2 SV=2	3	2	-0.727783	0.000247129	0.0250489	(DKO_1 - WT) - (DKO_2 - WT)	candidate
Itga9	B8JK39	Integrin alpha-9 OS=Mus musculus GN=Itga9 PE=1 SV=1	3	2	-0.727622	3.26177e-05	0.0115079	(DKO_1 - WT) - (DKO_2 - WT)	candidate
Agtr2	P35374	Type-2 angiotensin II receptor OS=Mus musculus GN=Agtr2 PE=1 SV=1	3	2	-0.723981	0.00012729	0.0107945	DKO_1 - WT	candidate
Dpp4	P28843	Dipeptidyl peptidase 4 OS=Mus musculus GN=Dpp4 PE=1 SV=3	3	2	-0.721916	2.40329e-05	0.023552	DKO_2 - WT	candidate
Cdh1	A0A0R4IZW5|P09803	Cadherin 1, isoform CRA_b OS=Mus musculus GN=Cdh1 PE=1 SV=1|Cadherin-1 OS=Mus musculus GN=Cdh1 PE=1 SV=1	3	2	-0.721054	2.74836e-05	0.023552	DKO_2 - WT	candidate
Rab34	Q0PD20|Q64008	Rab34 OS=Mus musculus GN=Rab34 PE=1 SV=1|Ras-related protein Rab-34 OS=Mus musculus GN=Rab34 PE=1 SV=2	3	2	-0.718122	6.59411e-05	0.00763857	DKO_1 - WT	candidate
Samd4a	Q8CBY1-4	Isoform 4 of Protein Smaug homolog 1 OS=Mus musculus GN=Samd4a	3	2	-0.717425	0.000132915	0.0110436	DKO_1 - WT	candidate
Nradd	Q8CJ26	Death domain-containing membrane protein NRADD OS=Mus musculus GN=Nradd PE=1 SV=1	3	2	-0.714453	0.000156623	0.0110436	DKO_1 - WT	candidate
Cacna2d3	Q9Z1L5	Voltage-dependent calcium channel subunit alpha-2/delta-3 OS=Mus musculus GN=Cacna2d3 PE=1 SV=1	3	2	-0.709565	2.55888e-05	0.023552	DKO_2 - WT	candidate
Epcam	Q99JW5	Epithelial cell adhesion molecule OS=Mus musculus GN=Epcam PE=1 SV=1	3	2	-0.706545	2.90452e-05	0.023552	DKO_2 - WT	candidate
Sorbs3	Q9R1Z8	Vinexin OS=Mus musculus GN=Sorbs3 PE=1 SV=1	3	2	-0.704202	0.000118687	0.0107945	DKO_1 - WT	candidate
Dnmt3l	A3EWM2|Q9CWR8	DNA (Cytosine-5-)-methyltransferase 3-like, isoform CRA_b OS=Mus musculus GN=Dnmt3l PE=1 SV=1|DNA (cytosine-5)-methyltransferase 3-like OS=Mus musculus GN=Dnmt3l PE=1 SV=1	3	2	-0.703423	7.25005e-05	0.0081088	DKO_1 - WT	candidate
Pcdhgc3	Q91XX1	Protein Pcdhgc3 OS=Mus musculus GN=Pcdhgc3 PE=1 SV=1	3	2	-0.703277	0.000252042	0.014469	DKO_1 - WT	candidate
Dnmt3l	A3EWM2|Q9CWR8	DNA (Cytosine-5-)-methyltransferase 3-like, isoform CRA_b OS=Mus musculus GN=Dnmt3l PE=1 SV=1|DNA (cytosine-5)-methyltransferase 3-like OS=Mus musculus GN=Dnmt3l PE=1 SV=1	3	2	-0.700685	7.49184e-05	0.0539995	DKO_2 - WT	candidate
Emilin1	Q99K41	EMILIN-1 OS=Mus musculus GN=Emilin1 PE=1 SV=1	3	2	-0.699971	5.64268e-05	0.00703924	DKO_1 - WT	candidate
Postn	Q62009	Periostin OS=Mus musculus GN=Postn PE=1 SV=2	3	2	-0.699541	0.000127508	0.0107945	DKO_1 - WT	candidate
Fkbp7	O54998|Q3UU11	Peptidyl-prolyl cis-trans isomerase FKBP7 OS=Mus musculus GN=Fkbp7 PE=1 SV=1|FK506 binding protein 7 OS=Mus musculus GN=Fkbp7 PE=1 SV=1	3	2	-0.699101	0.000828743	0.0292177	DKO_1 - WT	candidate
Adgra2	J3QMG7|Q91ZV8	Adhesion G protein-coupled receptor A2 OS=Mus musculus GN=Adgra2 PE=1 SV=1|Adhesion G protein-coupled receptor A2 OS=Mus musculus GN=Adgra2 PE=1 SV=2	3	2	-0.697209	0.000153766	0.0110436	DKO_1 - WT	candidate
Myrf	Q3UR85|Q3UR85-2|Q3UR85-3|Q3UR85-5	Myelin regulatory factor OS=Mus musculus GN=Myrf PE=1 SV=2|Isoform 2 of Myelin regulatory factor OS=Mus musculus GN=Myrf|Isoform 3 of Myelin regulatory factor OS=Mus musculus GN=Myrf|Isoform 4 of Myelin regulatory factor OS=Mus musculus GN=Myrf	3	2	-0.697131	0.000255873	0.0145601	DKO_1 - WT	candidate
Tgfbr2	Q62312|Q62312-2	TGF-beta receptor type-2 OS=Mus musculus GN=Tgfbr2 PE=1 SV=1|Isoform RII-1 of TGF-beta receptor type-2 OS=Mus musculus GN=Tgfbr2	3	2	-0.695788	0.000374834	0.0315786	(DKO_1 - WT) - (DKO_2 - WT)	candidate
Itm2b	O89051	Integral membrane protein 2B OS=Mus musculus GN=Itm2b PE=1 SV=1	3	2	-0.694397	0.000332118	0.0176302	DKO_1 - WT	candidate
Dpp4	P28843	Dipeptidyl peptidase 4 OS=Mus musculus GN=Dpp4 PE=1 SV=3	3	2	-0.694299	3.37934e-05	0.0061434	DKO_1 - WT	candidate
Fkbp10	Q61576	Peptidyl-prolyl cis-trans isomerase FKBP10 OS=Mus musculus GN=Fkbp10 PE=1 SV=2	3	2	-0.691611	3.09158e-05	0.0061434	DKO_1 - WT	candidate
Sparc	P07214|Q5NCU4|Q5NCU5	SPARC OS=Mus musculus GN=Sparc PE=1 SV=1|SPARC OS=Mus musculus GN=Sparc PE=1 SV=1|SPARC OS=Mus musculus GN=Sparc PE=1 SV=1	3	2	-0.690727	0.00171099	0.0541423	(DKO_1 - WT) - (DKO_2 - WT)	candidate
Sulf1	A0A0R4J2D2|Q8K007	Extracellular sulfatase Sulf-1 OS=Mus musculus GN=Sulf1 PE=1 SV=1|Extracellular sulfatase Sulf-1 OS=Mus musculus GN=Sulf1 PE=2 SV=1	3	2	-0.68935	0.000138007	0.0186511	(DKO_1 - WT) - (DKO_2 - WT)	candidate
Gsn	P13020-2	Isoform 2 of Gelsolin OS=Mus musculus GN=Gsn	3	2	-0.686182	5.8391e-05	0.00706665	DKO_1 - WT	candidate
Sema5a	Q3UPZ0|Q62217	Sema domain, seven thrombospondin repeats (Type 1 and type 1-like), transmembrane domain (TM) and short cytoplasmic domain, (Semaphorin) 5A, isoform CRA_a OS=Mus musculus GN=Sema5a PE=1 SV=1|Semaphorin-5A OS=Mus musculus GN=Sema5a PE=2 SV=1	3	2	-0.686011	0.000116439	0.0107945	DKO_1 - WT	candidate
Colec12	Q8K4Q8	Collectin-12 OS=Mus musculus GN=Colec12 PE=1 SV=1	3	2	-0.685252	0.000100742	0.0167567	(DKO_1 - WT) - (DKO_2 - WT)	candidate
Ddr2	Q62371	Discoidin domain-containing receptor 2 OS=Mus musculus GN=Ddr2 PE=1 SV=2	3	2	-0.684447	0.000279936	0.0153894	DKO_1 - WT	candidate
Ahnak	E9Q616	Protein Ahnak OS=Mus musculus GN=Ahnak PE=1 SV=1	3	2	-0.684051	0.00283233	0.0696573	(DKO_1 - WT) - (DKO_2 - WT)	candidate
Gulp1	Q8K2A1	PTB domain-containing engulfment adapter protein 1 OS=Mus musculus GN=Gulp1 PE=1 SV=1	3	2	-0.684009	3.6343e-05	0.0115079	(DKO_1 - WT) - (DKO_2 - WT)	candidate
Tmem119	Q8R138	Transmembrane protein 119 OS=Mus musculus GN=Tmem119 PE=1 SV=1	3	2	-0.683897	0.000680585	0.036253	(DKO_1 - WT) - (DKO_2 - WT)	candidate
Col5a1	B1AWB9|O88207	Collagen alpha-1(V) chain OS=Mus musculus GN=Col5a1 PE=1 SV=1|Collagen alpha-1(V) chain OS=Mus musculus GN=Col5a1 PE=1 SV=2	3	2	-0.683716	0.000334286	0.0176302	DKO_1 - WT	candidate
Wnt11	P48615|Q059Y4	Protein Wnt-11 OS=Mus musculus GN=Wnt11 PE=2 SV=1|Protein Wnt OS=Mus musculus GN=Wnt11 PE=1 SV=1	3	2	-0.682231	0.000120778	0.0186511	(DKO_1 - WT) - (DKO_2 - WT)	candidate
Sppl3	Q9CUS9	Signal peptide peptidase-like 3 OS=Mus musculus GN=Sppl3 PE=1 SV=3	3	2	-0.679016	0.000591328	0.0348723	(DKO_1 - WT) - (DKO_2 - WT)	candidate
Ankrd13c	Q3UX43	Ankyrin repeat domain-containing protein 13C OS=Mus musculus GN=Ankrd13c PE=1 SV=2	3	2	-0.675697	0.000693506	0.0260045	DKO_1 - WT	candidate
Necap2	Q9D1J1	Adaptin ear-binding coat-associated protein 2 OS=Mus musculus GN=Necap2 PE=1 SV=1	3	2	-0.671646	6.46462e-05	0.0135478	(DKO_1 - WT) - (DKO_2 - WT)	candidate
Col11a1	Q61245|Q61245-2	Collagen alpha-1(XI) chain OS=Mus musculus GN=Col11a1 PE=1 SV=2|Isoform Short of Collagen alpha-1(XI) chain OS=Mus musculus GN=Col11a1	3	2	-0.670391	0.000211824	0.013605	DKO_1 - WT	candidate
Arhgef17	Q80U35	Rho guanine nucleotide exchange factor 17 OS=Mus musculus GN=Arhgef17 PE=1 SV=2	3	2	-0.668988	0.000111377	0.0107837	DKO_1 - WT	candidate
Islr	Q6GU68	Immunoglobulin superfamily containing leucine-rich repeat protein OS=Mus musculus GN=Islr PE=1 SV=1	3	2	-0.666997	0.00019751	0.0129419	DKO_1 - WT	candidate
Mrc2	Q64449	C-type mannose receptor 2 OS=Mus musculus GN=Mrc2 PE=1 SV=3	3	2	-0.666804	4.68064e-05	0.00668551	DKO_1 - WT	candidate
Ackr3	P56485	Atypical chemokine receptor 3 OS=Mus musculus GN=Ackr3 PE=1 SV=2	3	2	-0.66659	0.000296154	0.0270584	(DKO_1 - WT) - (DKO_2 - WT)	candidate
Nbea	Q9EPN1|Q9EPN1-4	Neurobeachin OS=Mus musculus GN=Nbea PE=1 SV=1|Isoform 4 of Neurobeachin OS=Mus musculus GN=Nbea	3	2	-0.665438	7.30961e-05	0.0135478	(DKO_1 - WT) - (DKO_2 - WT)	candidate
Parm1	Q923D3	Prostate androgen-regulated mucin-like protein 1 homolog OS=Mus musculus GN=Parm1 PE=1 SV=1	3	2	-0.665429	0.00119943	0.0477195	(DKO_1 - WT) - (DKO_2 - WT)	candidate
Add3	Q9QYB5-2	Isoform 1 of Gamma-adducin OS=Mus musculus GN=Add3	3	2	-0.663693	0.00016062	0.0112037	DKO_1 - WT	candidate
Scarf2	P59222|Q58A84	Scavenger receptor class F member 2 OS=Mus musculus GN=Scarf2 PE=1 SV=1|NSR1 OS=Mus musculus GN=Scarf2 PE=1 SV=1	3	2	-0.663428	0.000604444	0.0238534	DKO_1 - WT	candidate
Col26a1	Q91VF6|Q91VF6-2	Collagen alpha-1(XXVI) chain OS=Mus musculus GN=Col26a1 PE=1 SV=1|Isoform 2 of Collagen alpha-1(XXVI) chain OS=Mus musculus GN=Col26a1	3	2	-0.66297	0.000165937	0.0112128	DKO_1 - WT	candidate
AW551984	Q8BGF0	Protein AW551984 OS=Mus musculus GN=AW551984 PE=1 SV=1	3	2	-0.658237	0.000153507	0.0195254	(DKO_1 - WT) - (DKO_2 - WT)	candidate
Cpz	Q8R4V4	Carboxypeptidase Z OS=Mus musculus GN=Cpz PE=2 SV=2	3	2	-0.657454	0.000137722	0.0110436	DKO_1 - WT	candidate
Cpz	Q8R4V4	Carboxypeptidase Z OS=Mus musculus GN=Cpz PE=2 SV=2	3	2	-0.646954	0.000156997	0.0195853	(DKO_1 - WT) - (DKO_2 - WT)	candidate
Igsf10	Q3V1M1	Immunoglobulin superfamily member 10 OS=Mus musculus GN=Igsf10 PE=2 SV=2	3	2	-0.645015	5.63034e-05	0.00703924	DKO_1 - WT	candidate
Kank2	Q8BX02|Q8BX02-2	KN motif and ankyrin repeat domain-containing protein 2 OS=Mus musculus GN=Kank2 PE=1 SV=1|Isoform 2 of KN motif and ankyrin repeat domain-containing protein 2 OS=Mus musculus GN=Kank2	3	2	-0.643168	9.97291e-05	0.0101085	DKO_1 - WT	candidate
Reck	Q9Z0J1	Reversion-inducing cysteine-rich protein with Kazal motifs OS=Mus musculus GN=Reck PE=1 SV=2	3	2	-0.641966	0.000321703	0.0285875	(DKO_1 - WT) - (DKO_2 - WT)	candidate
Eef1a2	P62631	Elongation factor 1-alpha 2 OS=Mus musculus GN=Eef1a2 PE=1 SV=1	3	2	-0.64185	0.00265504	0.0688931	(DKO_1 - WT) - (DKO_2 - WT)	candidate
Nfic	P70255|P70255-2|P70255-3|P70255-4|P70255-5	Nuclear factor 1 C-type OS=Mus musculus GN=Nfic PE=1 SV=1|Isoform 2 of Nuclear factor 1 C-type OS=Mus musculus GN=Nfic|Isoform 3 of Nuclear factor 1 C-type OS=Mus musculus GN=Nfic|Isoform 4 of Nuclear factor 1 C-type OS=Mus musculus GN=Nfic|Isoform 5 of Nuclear factor 1 C-type OS=Mus musculus GN=Nfic	3	2	-0.641444	7.2707e-05	0.0135478	(DKO_1 - WT) - (DKO_2 - WT)	candidate
Ahnak2	E9PYB0|F7DBB3	Protein Ahnak2 (Fragment) OS=Mus musculus GN=Ahnak2 PE=1 SV=7|Protein Ahnak2 (Fragment) OS=Mus musculus GN=Ahnak2 PE=1 SV=1	3	2	-0.639028	0.0136397	0.149461	(DKO_1 - WT) - (DKO_2 - WT)	candidate
Prrx1	G3UZ44|P63013|P63013-2	Paired mesoderm homeobox protein 1 OS=Mus musculus GN=Prrx1 PE=1 SV=1|Paired mesoderm homeobox protein 1 OS=Mus musculus GN=Prrx1 PE=1 SV=1|Isoform 2 of Paired mesoderm homeobox protein 1 OS=Mus musculus GN=Prrx1	3	2	-0.638747	0.000495745	0.0345795	(DKO_1 - WT) - (DKO_2 - WT)	candidate
S100a10	P08207|Q3TC45	Protein S100-A10 OS=Mus musculus GN=S100a10 PE=1 SV=2|Protein S100-A10 OS=Mus musculus GN=S100a10 PE=1 SV=1	3	2	-0.637536	9.4788e-05	0.00991757	DKO_1 - WT	candidate
Stk10	O55098	Serine/threonine-protein kinase 10 OS=Mus musculus GN=Stk10 PE=1 SV=2	3	2	-0.631829	0.00659271	0.0980382	DKO_1 - WT	candidate
Rbmxl2	Q9DAE2	Protein Rbmxl2 OS=Mus musculus GN=Rbmxl2 PE=1 SV=1	3	2	-0.629547	0.00846571	0.635879	DKO_2 - WT	no hit
Itga8	A2ARA8	Integrin alpha-8 OS=Mus musculus GN=Itga8 PE=1 SV=1	3	2	-0.628562	7.52037e-05	0.00813077	DKO_1 - WT	candidate
Pcdhga8	Q91XX0	MCG133388, isoform CRA_r OS=Mus musculus GN=Pcdhga8 PE=1 SV=1	3	2	-0.626877	0.000203481	0.0232185	(DKO_1 - WT) - (DKO_2 - WT)	candidate
Tmem59	Q9QY73	Transmembrane protein 59 OS=Mus musculus GN=Tmem59 PE=1 SV=2	3	2	-0.626445	0.000447551	0.0204501	DKO_1 - WT	candidate
Mgme1	Q9CXC3	Mitochondrial genome maintenance exonuclease 1 OS=Mus musculus GN=Mgme1 PE=2 SV=1	3	2	-0.625682	0.00195939	0.0483291	DKO_1 - WT	candidate
Alcam	E9Q3Q6	CD166 antigen OS=Mus musculus GN=Alcam PE=1 SV=1	3	2	-0.625643	0.000155552	0.0110436	DKO_1 - WT	candidate
Lrp12	Q8BUJ9|Q8BUJ9-2	Low-density lipoprotein receptor-related protein 12 OS=Mus musculus GN=Lrp12 PE=2 SV=2|Isoform 2 of Low-density lipoprotein receptor-related protein 12 OS=Mus musculus GN=Lrp12	3	2	-0.625347	0.0063679	0.103883	(DKO_1 - WT) - (DKO_2 - WT)	candidate
Postn	Q62009	Periostin OS=Mus musculus GN=Postn PE=1 SV=2	3	2	-0.623103	0.00032145	0.139016	DKO_2 - WT	candidate
Tmem176b	Q9R1Q6	Transmembrane protein 176B OS=Mus musculus GN=Tmem176b PE=1 SV=1	3	2	-0.622691	0.00131902	0.0491334	(DKO_1 - WT) - (DKO_2 - WT)	candidate
Scarf2	P59222|Q58A84	Scavenger receptor class F member 2 OS=Mus musculus GN=Scarf2 PE=1 SV=1|NSR1 OS=Mus musculus GN=Scarf2 PE=1 SV=1	3	2	-0.620753	0.000982751	0.0445778	(DKO_1 - WT) - (DKO_2 - WT)	candidate
Vim	P20152|Q5FWJ3	Vimentin OS=Mus musculus GN=Vim PE=1 SV=3|Vimentin OS=Mus musculus GN=Vim PE=1 SV=1	3	2	-0.619864	0.000171831	0.0210314	(DKO_1 - WT) - (DKO_2 - WT)	candidate
Notch1	Q01705|Q01705-3|Q01705-4	Neurogenic locus notch homolog protein 1 OS=Mus musculus GN=Notch1 PE=1 SV=3|Isoform 3 of Neurogenic locus notch homolog protein 1 OS=Mus musculus GN=Notch1|Isoform 4 of Neurogenic locus notch homolog protein 1 OS=Mus musculus GN=Notch1	3	2	-0.619157	0.000441407	0.0204501	DKO_1 - WT	candidate
Nradd	Q8CJ26	Death domain-containing membrane protein NRADD OS=Mus musculus GN=Nradd PE=1 SV=1	3	2	-0.617677	0.000490416	0.0345795	(DKO_1 - WT) - (DKO_2 - WT)	candidate
Cpox	P36552	Oxygen-dependent coproporphyrinogen-III oxidase, mitochondrial OS=Mus musculus GN=Cpox PE=1 SV=2	3	2	-0.617129	0.000113807	0.0184567	(DKO_1 - WT) - (DKO_2 - WT)	candidate
Lmo7	E9PYF4|E9PYI7|F6TFN2|F6VG99	Protein Lmo7 OS=Mus musculus GN=Lmo7 PE=1 SV=1|Protein Lmo7 OS=Mus musculus GN=Lmo7 PE=1 SV=1|Protein Lmo7 (Fragment) OS=Mus musculus GN=Lmo7 PE=1 SV=1|Protein Lmo7 (Fragment) OS=Mus musculus GN=Lmo7 PE=1 SV=1	3	2	-0.611173	0.000334269	0.0293028	(DKO_1 - WT) - (DKO_2 - WT)	candidate
Ltbp1	Q8CG19	Latent-transforming growth factor beta-binding protein 1 OS=Mus musculus GN=Ltbp1 PE=1 SV=2	3	2	-0.608628	0.000282259	0.0265365	(DKO_1 - WT) - (DKO_2 - WT)	candidate
Glipr2	Q9CYL5	Golgi-associated plant pathogenesis-related protein 1 OS=Mus musculus GN=Glipr2 PE=1 SV=3	3	2	-0.605923	0.000556906	0.0346449	(DKO_1 - WT) - (DKO_2 - WT)	candidate
Dnmt3b	O88509|O88509-2|Q3KR45	DNA (cytosine-5)-methyltransferase 3B OS=Mus musculus GN=Dnmt3b PE=1 SV=2|Isoform 2 of DNA (cytosine-5)-methyltransferase 3B OS=Mus musculus GN=Dnmt3b|DNA (cytosine-5)-methyltransferase 3B OS=Mus musculus GN=Dnmt3b PE=1 SV=1	3	2	-0.603581	0.000117762	0.0694477	DKO_2 - WT	candidate
Enpep	P16406|Q52JJ6	Glutamyl aminopeptidase OS=Mus musculus GN=Enpep PE=1 SV=1|Aminopeptidase A OS=Mus musculus GN=Enpep PE=1 SV=1	3	2	-0.603141	0.000733819	0.0380823	(DKO_1 - WT) - (DKO_2 - WT)	candidate
Tgfb2	A0A0A6YXU9|P27090	Transforming growth factor beta-2 OS=Mus musculus GN=Tgfb2 PE=1 SV=1|Transforming growth factor beta-2 OS=Mus musculus GN=Tgfb2 PE=1 SV=2	3	2	-0.603122	0.000225999	0.0240337	(DKO_1 - WT) - (DKO_2 - WT)	candidate
Bnc1	F8VPY0|O35914	Zinc finger protein basonuclin-1 OS=Mus musculus GN=Bnc1 PE=4 SV=1|Zinc finger protein basonuclin-1 OS=Mus musculus GN=Bnc1 PE=1 SV=1	3	2	-0.601659	0.00464995	0.0800111	DKO_1 - WT	candidate
Col14a1	B7ZNH7|K3W4R4|Q80X19|Q80X19-2	Collagen alpha-1(XIV) chain OS=Mus musculus GN=Col14a1 PE=1 SV=1|Collagen alpha-1(XIV) chain OS=Mus musculus GN=Col14a1 PE=1 SV=1|Collagen alpha-1(XIV) chain OS=Mus musculus GN=Col14a1 PE=1 SV=2|Isoform 2 of Collagen alpha-1(XIV) chain OS=Mus musculus GN=Col14a1	3	2	-0.601221	9.90567e-05	0.0101085	DKO_1 - WT	candidate
Sulf1	A0A0R4J2D2|Q8K007	Extracellular sulfatase Sulf-1 OS=Mus musculus GN=Sulf1 PE=1 SV=1|Extracellular sulfatase Sulf-1 OS=Mus musculus GN=Sulf1 PE=2 SV=1	3	2	-0.599076	0.000418859	0.019979	DKO_1 - WT	candidate
Mcam	Q8R2Y2	Cell surface glycoprotein MUC18 OS=Mus musculus GN=Mcam PE=1 SV=1	3	2	-0.598365	0.000411572	0.03318	(DKO_1 - WT) - (DKO_2 - WT)	candidate
Mov10	D3YVL0|D3Z3E8|E9PW39|P23249	Putative helicase MOV-10 OS=Mus musculus GN=Mov10 PE=1 SV=2|Putative helicase MOV-10 OS=Mus musculus GN=Mov10 PE=1 SV=1|Putative helicase MOV-10 OS=Mus musculus GN=Mov10 PE=1 SV=1|Putative helicase MOV-10 OS=Mus musculus GN=Mov10 PE=1 SV=2	3	2	-0.597621	0.000390384	0.0190408	DKO_1 - WT	candidate
Dcn	P28654|Q3UKR1	Decorin OS=Mus musculus GN=Dcn PE=1 SV=1|Decorin OS=Mus musculus GN=Dcn PE=1 SV=1	3	2	-0.59716	0.000236062	0.0142573	DKO_1 - WT	candidate
Serpinh1	A0A140LHR4|P19324	Serpin H1 (Fragment) OS=Mus musculus GN=Serpinh1 PE=1 SV=1|Serpin H1 OS=Mus musculus GN=Serpinh1 PE=1 SV=3	3	2	-0.597147	0.000148478	0.0110436	DKO_1 - WT	candidate
Col4a2	B2RQQ8|P08122	Collagen alpha-2(IV) chain OS=Mus musculus GN=Col4a2 PE=1 SV=1|Collagen alpha-2(IV) chain OS=Mus musculus GN=Col4a2 PE=1 SV=4	3	2	-0.597145	0.000281656	0.130507	DKO_2 - WT	candidate
Cdh3	P10287	Cadherin-3 OS=Mus musculus GN=Cdh3 PE=1 SV=2	3	2	-0.596852	0.00115137	0.0359084	DKO_1 - WT	candidate
Pip4k2c	Q91XU3	Phosphatidylinositol 5-phosphate 4-kinase type-2 gamma OS=Mus musculus GN=Pip4k2c PE=1 SV=1	3	2	-0.59524	0.000414417	0.03318	(DKO_1 - WT) - (DKO_2 - WT)	candidate
Rcn3	Q8BH97	Reticulocalbin-3 OS=Mus musculus GN=Rcn3 PE=1 SV=1	3	2	-0.595006	0.000402327	0.0194768	DKO_1 - WT	candidate
Chmp6	B1AZ39|P0C0A3	Charged multivesicular body protein 6 OS=Mus musculus GN=Chmp6 PE=1 SV=1|Charged multivesicular body protein 6 OS=Mus musculus GN=Chmp6 PE=1 SV=2	3	2	-0.594666	0.00293122	0.061338	DKO_1 - WT	candidate
Vcam1	P29533|Q3UPN1	Vascular cell adhesion protein 1 OS=Mus musculus GN=Vcam1 PE=1 SV=1|Vascular cell adhesion protein 1 OS=Mus musculus GN=Vcam1 PE=1 SV=1	3	2	-0.593229	0.000610638	0.0350549	(DKO_1 - WT) - (DKO_2 - WT)	candidate
Tgfbr3	A0A0R4J097	Transforming growth factor beta receptor type 3 OS=Mus musculus GN=Tgfbr3 PE=1 SV=1	3	2	-0.593162	0.000374765	0.0315786	(DKO_1 - WT) - (DKO_2 - WT)	candidate
Fkbp7	O54998|Q3UU11	Peptidyl-prolyl cis-trans isomerase FKBP7 OS=Mus musculus GN=Fkbp7 PE=1 SV=1|FK506 binding protein 7 OS=Mus musculus GN=Fkbp7 PE=1 SV=1	3	2	-0.589927	0.00267298	0.0690822	(DKO_1 - WT) - (DKO_2 - WT)	candidate
Zfp329|Znf329	B2RSV9|Q6GQR8	Zinc finger protein 329 OS=Mus musculus GN=Zfp329 PE=1 SV=1|Zinc finger protein 329 OS=Mus musculus GN=Znf329 PE=1 SV=2	3	2	-0.589362	0.0374567	0.248954	(DKO_1 - WT) - (DKO_2 - WT)	no hit
Col6a1	Q04857	Collagen alpha-1(VI) chain OS=Mus musculus GN=Col6a1 PE=1 SV=1	3	2	-0.589173	0.000165748	0.0112128	DKO_1 - WT	candidate
Col12a1	F6WIM8|Q60847|Q60847-2|Q60847-5	Collagen alpha-1(XII) chain (Fragment) OS=Mus musculus GN=Col12a1 PE=1 SV=1|Collagen alpha-1(XII) chain OS=Mus musculus GN=Col12a1 PE=2 SV=3|Isoform 2 of Collagen alpha-1(XII) chain OS=Mus musculus GN=Col12a1|Isoform 5 of Collagen alpha-1(XII) chain OS=Mus musculus GN=Col12a1	3	2	-0.586338	0.000199244	0.0232185	(DKO_1 - WT) - (DKO_2 - WT)	candidate
Paf	Q9CQX4	PCNA-associated factor OS=Mus musculus GN=Paf PE=1 SV=1	3	2	-0.584759	0.000124941	0.0107945	DKO_1 - WT	no hit
P3h3	Q8CG70	Prolyl 3-hydroxylase 3 OS=Mus musculus GN=P3h3 PE=1 SV=1	3	2	-0.584705	0.000974795	0.0323179	DKO_1 - WT	no hit
Thy1	P01831	Thy-1 membrane glycoprotein OS=Mus musculus GN=Thy1 PE=1 SV=1	3	2	-0.584126	0.000163793	0.0112128	DKO_1 - WT	no hit
Anxa2	P07356|Q542G9	Annexin A2 OS=Mus musculus GN=Anxa2 PE=1 SV=2|Annexin OS=Mus musculus GN=Anxa2 PE=1 SV=1	3	2	-0.583767	0.00027501	0.0153792	DKO_1 - WT	no hit
Sumf1	E9Q0Z7|E9Q265|Q8R0F3	Sulfatase-modifying factor 1 OS=Mus musculus GN=Sumf1 PE=1 SV=1|Sulfatase-modifying factor 1 OS=Mus musculus GN=Sumf1 PE=1 SV=1|Sulfatase-modifying factor 1 OS=Mus musculus GN=Sumf1 PE=1 SV=2	3	2	-0.582576	0.000214754	0.0232185	(DKO_1 - WT) - (DKO_2 - WT)	no hit
Fzd1	O70421	Frizzled-1 OS=Mus musculus GN=Fzd1 PE=2 SV=3	3	2	-0.581893	0.000884976	0.030215	DKO_1 - WT	no hit
Wdr74	Q8VCG3	WD repeat-containing protein 74 OS=Mus musculus GN=Wdr74 PE=2 SV=1	3	2	-0.580857	0.000570955	0.0346449	(DKO_1 - WT) - (DKO_2 - WT)	no hit
Agtr2	P35374	Type-2 angiotensin II receptor OS=Mus musculus GN=Agtr2 PE=1 SV=1	3	2	-0.580618	0.000710501	0.202446	DKO_2 - WT	no hit
Atp2b4	Q6Q477	Plasma membrane calcium-transporting ATPase 4 OS=Mus musculus GN=Atp2b4 PE=1 SV=1	3	2	-0.580603	0.000184555	0.0122164	DKO_1 - WT	no hit
Tgfb2	A0A0A6YXU9|P27090	Transforming growth factor beta-2 OS=Mus musculus GN=Tgfb2 PE=1 SV=1|Transforming growth factor beta-2 OS=Mus musculus GN=Tgfb2 PE=1 SV=2	3	2	-0.579839	0.000308114	0.0167961	DKO_1 - WT	no hit
Il17rd	Q8JZL1	Interleukin-17 receptor D OS=Mus musculus GN=Il17rd PE=1 SV=1	3	2	-0.578057	0.000738555	0.0270678	DKO_1 - WT	no hit
Necap2	Q9D1J1	Adaptin ear-binding coat-associated protein 2 OS=Mus musculus GN=Necap2 PE=1 SV=1	3	2	-0.577916	0.000222191	0.0140766	DKO_1 - WT	no hit
Wasf2	Q8BH43	Wiskott-Aldrich syndrome protein family member 2 OS=Mus musculus GN=Wasf2 PE=1 SV=1	3	2	-0.575873	0.000146055	0.0110436	DKO_1 - WT	no hit
Cdh11	P55288	Cadherin-11 OS=Mus musculus GN=Cdh11 PE=1 SV=1	3	2	-0.57449	0.000553975	0.0346449	(DKO_1 - WT) - (DKO_2 - WT)	no hit
Ror2	E9PUN5|Q9Z138	Tyrosine-protein kinase transmembrane receptor ROR2 OS=Mus musculus GN=Ror2 PE=1 SV=1|Tyrosine-protein kinase transmembrane receptor ROR2 OS=Mus musculus GN=Ror2 PE=1 SV=2	3	2	-0.573827	0.000239563	0.0142573	DKO_1 - WT	no hit
Lmna	P48678	Prelamin-A/C OS=Mus musculus GN=Lmna PE=1 SV=2	3	2	-0.573216	0.000878642	0.030215	DKO_1 - WT	no hit
Piezo1	E9PUQ9	Piezo-type mechanosensitive ion channel component OS=Mus musculus GN=Piezo1 PE=1 SV=1	3	2	-0.571198	0.000155623	0.0110436	DKO_1 - WT	no hit
Rab34	Q0PD20|Q64008	Rab34 OS=Mus musculus GN=Rab34 PE=1 SV=1|Ras-related protein Rab-34 OS=Mus musculus GN=Rab34 PE=1 SV=2	3	2	-0.56763	0.000438295	0.03318	(DKO_1 - WT) - (DKO_2 - WT)	no hit
Igdcc4	Q9EQS9|Q9EQS9-2	Immunoglobulin superfamily DCC subclass member 4 OS=Mus musculus GN=Igdcc4 PE=2 SV=1|Isoform 2 of Immunoglobulin superfamily DCC subclass member 4 OS=Mus musculus GN=Igdcc4	3	2	-0.566666	0.00033897	0.017654	DKO_1 - WT	no hit
AW551984	Q8BGF0	Protein AW551984 OS=Mus musculus GN=AW551984 PE=1 SV=1	3	2	-0.566437	0.000498528	0.021276	DKO_1 - WT	no hit
Loxl1	A0A0R4J0Q4|P97873	Lysyl oxidase homolog 1 OS=Mus musculus GN=Loxl1 PE=1 SV=1|Lysyl oxidase homolog 1 OS=Mus musculus GN=Loxl1 PE=2 SV=3	3	2	-0.565372	0.000422391	0.0200004	DKO_1 - WT	no hit
Stk10	O55098	Serine/threonine-protein kinase 10 OS=Mus musculus GN=Stk10 PE=1 SV=2	3	2	-0.564831	0.0122627	0.141545	(DKO_1 - WT) - (DKO_2 - WT)	no hit
Col16a1	E9Q0X4|Q8BLX7	Collagen alpha-1(XVI) chain OS=Mus musculus GN=Col16a1 PE=1 SV=1|Collagen alpha-1(XVI) chain OS=Mus musculus GN=Col16a1 PE=1 SV=2	3	2	-0.564798	0.000470238	0.0338937	(DKO_1 - WT) - (DKO_2 - WT)	no hit
Hspa12b	Q9CZJ2	Heat shock 70 kDa protein 12B OS=Mus musculus GN=Hspa12b PE=1 SV=1	3	2	-0.564703	0.00159003	0.0427989	DKO_1 - WT	no hit
Kank2	Q8BX02|Q8BX02-2	KN motif and ankyrin repeat domain-containing protein 2 OS=Mus musculus GN=Kank2 PE=1 SV=1|Isoform 2 of KN motif and ankyrin repeat domain-containing protein 2 OS=Mus musculus GN=Kank2	3	2	-0.563529	0.000289708	0.0268477	(DKO_1 - WT) - (DKO_2 - WT)	no hit
Tmeff2	Q9QYM9|Q9QYM9-2	Tomoregulin-2 OS=Mus musculus GN=Tmeff2 PE=2 SV=1|Isoform 2 of Tomoregulin-2 OS=Mus musculus GN=Tmeff2	3	2	-0.563073	0.000420673	0.03318	(DKO_1 - WT) - (DKO_2 - WT)	no hit
Alcam	E9Q3Q6	CD166 antigen OS=Mus musculus GN=Alcam PE=1 SV=1	3	2	-0.562886	0.000359322	0.031079	(DKO_1 - WT) - (DKO_2 - WT)	no hit
Sppl3	Q9CUS9	Signal peptide peptidase-like 3 OS=Mus musculus GN=Sppl3 PE=1 SV=3	3	2	-0.562241	0.0022397	0.051889	DKO_1 - WT	no hit
Epb41l2	O70318	Band 4.1-like protein 2 OS=Mus musculus GN=Epb41l2 PE=1 SV=2	3	2	-0.559888	0.00024439	0.0144061	DKO_1 - WT	no hit
Man2a1	P27046	Alpha-mannosidase 2 OS=Mus musculus GN=Man2a1 PE=1 SV=2	3	2	-0.559261	0.000528261	0.0216888	DKO_1 - WT	no hit
Fhl3	Q9R059	Four and a half LIM domains protein 3 OS=Mus musculus GN=Fhl3 PE=1 SV=2	3	2	-0.559128	0.000278412	0.0153894	DKO_1 - WT	no hit
Stat3	P42227|P42227-2|P42227-3	Signal transducer and activator of transcription 3 OS=Mus musculus GN=Stat3 PE=1 SV=2|Isoform Stat3B of Signal transducer and activator of transcription 3 OS=Mus musculus GN=Stat3|Isoform Del-701 of Signal transducer and activator of transcription 3 OS=Mus musculus GN=Stat3	3	2	-0.556666	0.00023903	0.0142573	DKO_1 - WT	no hit
Lox	P28301|Q3TXH3	Protein-lysine 6-oxidase OS=Mus musculus GN=Lox PE=1 SV=1|Lysyl oxidase OS=Mus musculus GN=Lox PE=1 SV=1	3	2	-0.556607	0.000455125	0.03318	(DKO_1 - WT) - (DKO_2 - WT)	no hit
Tgfbi	A1L353|P82198	Transforming growth factor, beta induced OS=Mus musculus GN=Tgfbi PE=1 SV=1|Transforming growth factor-beta-induced protein ig-h3 OS=Mus musculus GN=Tgfbi PE=1 SV=1	3	2	-0.555641	0.000210572	0.0232185	(DKO_1 - WT) - (DKO_2 - WT)	no hit
Icam1	P13597|P13597-2	Intercellular adhesion molecule 1 OS=Mus musculus GN=Icam1 PE=1 SV=1|Isoform 2 of Intercellular adhesion molecule 1 OS=Mus musculus GN=Icam1	3	2	-0.555226	0.0015064	0.0519788	(DKO_1 - WT) - (DKO_2 - WT)	no hit
Itga8	A2ARA8	Integrin alpha-8 OS=Mus musculus GN=Itga8 PE=1 SV=1	3	2	-0.554873	0.000209023	0.0232185	(DKO_1 - WT) - (DKO_2 - WT)	no hit
Col1a1	P11087	Collagen alpha-1(I) chain OS=Mus musculus GN=Col1a1 PE=1 SV=4	3	2	-0.554248	0.0209377	0.183629	(DKO_1 - WT) - (DKO_2 - WT)	no hit
Anxa2	P07356|Q542G9	Annexin A2 OS=Mus musculus GN=Anxa2 PE=1 SV=2|Annexin OS=Mus musculus GN=Anxa2 PE=1 SV=1	3	2	-0.553165	0.000417448	0.03318	(DKO_1 - WT) - (DKO_2 - WT)	no hit
Mrps24	Q9CQV5	28S ribosomal protein S24, mitochondrial OS=Mus musculus GN=Mrps24 PE=1 SV=1	3	2	-0.552805	0.000742321	0.0381566	(DKO_1 - WT) - (DKO_2 - WT)	no hit
Prkg1	P0C605	cGMP-dependent protein kinase 1 OS=Mus musculus GN=Prkg1 PE=1 SV=1	3	2	-0.551752	0.00108754	0.0461104	(DKO_1 - WT) - (DKO_2 - WT)	no hit
Ptk7	Q8BKG3	Inactive tyrosine-protein kinase 7 OS=Mus musculus GN=Ptk7 PE=1 SV=1	3	2	-0.551615	0.000465784	0.020731	DKO_1 - WT	no hit
Med17	Q8VCD5	Mediator of RNA polymerase II transcription subunit 17 OS=Mus musculus GN=Med17 PE=1 SV=1	3	2	-0.551252	0.00179683	0.0560385	(DKO_1 - WT) - (DKO_2 - WT)	no hit
S1pr3	Q9Z0U9	Sphingosine 1-phosphate receptor 3 OS=Mus musculus GN=S1pr3 PE=2 SV=1	3	2	-0.550681	0.000791249	0.0284506	DKO_1 - WT	no hit
Pbx2	Q4FJL3|V9GXB8	Pbx2 protein OS=Mus musculus GN=Pbx2 PE=1 SV=1|Pre B-cell leukemia transcription factor 2, isoform CRA_d OS=Mus musculus GN=Pbx2 PE=1 SV=1	3	2	-0.549531	0.0101909	0.123107	DKO_1 - WT	no hit
Traf2	P39429|P39429-2	TNF receptor-associated factor 2 OS=Mus musculus GN=Traf2 PE=1 SV=1|Isoform 2 of TNF receptor-associated factor 2 OS=Mus musculus GN=Traf2	3	2	-0.547886	0.00259164	0.0567751	DKO_1 - WT	no hit
Sumf1	E9Q0Z7|E9Q265|Q8R0F3	Sulfatase-modifying factor 1 OS=Mus musculus GN=Sumf1 PE=1 SV=1|Sulfatase-modifying factor 1 OS=Mus musculus GN=Sumf1 PE=1 SV=1|Sulfatase-modifying factor 1 OS=Mus musculus GN=Sumf1 PE=1 SV=2	3	2	-0.547286	0.000350801	0.0179185	DKO_1 - WT	no hit
Gmds	Q8K0C9	GDP-mannose 4,6 dehydratase OS=Mus musculus GN=Gmds PE=1 SV=1	3	2	-0.547016	0.0116533	0.130778	DKO_1 - WT	no hit
Cyp1b1	Q64429	Cytochrome P450 1B1 OS=Mus musculus GN=Cyp1b1 PE=1 SV=3	3	2	-0.546667	0.00215658	0.0510575	DKO_1 - WT	no hit
Ephb3	P54754	Ephrin type-B receptor 3 OS=Mus musculus GN=Ephb3 PE=1 SV=2	3	2	-0.546323	0.00126761	0.037208	DKO_1 - WT	no hit
Dkk2	Q9QYZ8	Dickkopf-related protein 2 OS=Mus musculus GN=Dkk2 PE=1 SV=2	3	2	-0.54625	0.000450312	0.03318	(DKO_1 - WT) - (DKO_2 - WT)	no hit
Q9D937	Q9D937	Uncharacterized protein C11orf98 homolog OS=Mus musculus PE=1 SV=1	3	2	-0.546013	0.000222001	0.110778	DKO_2 - WT	no hit
Stra6	A0A0R4J115	Stimulated by retinoic acid gene 6 protein OS=Mus musculus GN=Stra6 PE=1 SV=1	3	2	-0.54535	0.000608554	0.0350549	(DKO_1 - WT) - (DKO_2 - WT)	no hit
Ephx1	E9PWK1|Q9D379	Epoxide hydrolase 1 OS=Mus musculus GN=Ephx1 PE=1 SV=1|Epoxide hydrolase 1 OS=Mus musculus GN=Ephx1 PE=1 SV=2	3	2	-0.545077	0.000670613	0.036253	(DKO_1 - WT) - (DKO_2 - WT)	no hit
Anpep	P97449	Aminopeptidase N OS=Mus musculus GN=Anpep PE=1 SV=4	3	2	-0.54454	0.000484916	0.020971	DKO_1 - WT	no hit
Antxr1	A0A0N4SV16|Q9CZ52|Q9CZ52-2	Anthrax toxin receptor 1 OS=Mus musculus GN=Antxr1 PE=1 SV=1|Anthrax toxin receptor 1 OS=Mus musculus GN=Antxr1 PE=1 SV=2|Isoform 2 of Anthrax toxin receptor 1 OS=Mus musculus GN=Antxr1	3	2	-0.543997	0.000676164	0.0257664	DKO_1 - WT	no hit
Snap23	A2AKH4|O09044|Q9D3L3	Synaptosomal-associated protein OS=Mus musculus GN=Snap23 PE=1 SV=1|Synaptosomal-associated protein 23 OS=Mus musculus GN=Snap23 PE=1 SV=1|Synaptosomal-associated protein OS=Mus musculus GN=Snap23 PE=1 SV=1	3	2	-0.543763	0.000450803	0.0204501	DKO_1 - WT	no hit
Bmpr1a	P36895|Q53Z43	Bone morphogenetic protein receptor type-1A OS=Mus musculus GN=Bmpr1a PE=2 SV=1|Receptor protein serine/threonine kinase OS=Mus musculus GN=Bmpr1a PE=1 SV=1	3	2	-0.542746	0.000344981	0.0177611	DKO_1 - WT	no hit
Igsf10	Q3V1M1	Immunoglobulin superfamily member 10 OS=Mus musculus GN=Igsf10 PE=2 SV=2	3	2	-0.542001	0.000235675	0.0246584	(DKO_1 - WT) - (DKO_2 - WT)	no hit
Rpl29	P47915|Q5M8M8	60S ribosomal protein L29 OS=Mus musculus GN=Rpl29 PE=2 SV=2|60S ribosomal protein L29 OS=Mus musculus GN=Rpl29 PE=2 SV=1	3	2	-0.541037	0.000448021	0.168115	DKO_2 - WT	no hit
Pdlim7	Q3TJD7	PDZ and LIM domain protein 7 OS=Mus musculus GN=Pdlim7 PE=1 SV=1	3	2	-0.539157	0.000368341	0.0182399	DKO_1 - WT	no hit
Chmp6	B1AZ39|P0C0A3	Charged multivesicular body protein 6 OS=Mus musculus GN=Chmp6 PE=1 SV=1|Charged multivesicular body protein 6 OS=Mus musculus GN=Chmp6 PE=1 SV=2	3	2	-0.538376	0.00543438	0.0963191	(DKO_1 - WT) - (DKO_2 - WT)	no hit
Cdh3	P10287	Cadherin-3 OS=Mus musculus GN=Cdh3 PE=1 SV=2	3	2	-0.536352	0.00239014	0.0655837	(DKO_1 - WT) - (DKO_2 - WT)	no hit
Mgme1	Q9CXC3	Mitochondrial genome maintenance exonuclease 1 OS=Mus musculus GN=Mgme1 PE=2 SV=1	3	2	-0.536286	0.00522952	0.093972	(DKO_1 - WT) - (DKO_2 - WT)	no hit
Snx17	Q8BVL3	Sorting nexin-17 OS=Mus musculus GN=Snx17 PE=1 SV=2	3	2	-0.536193	0.00226074	0.0520995	DKO_1 - WT	no hit
Zzz3	D3YTT9|Q6KAQ7	ZZ-type zinc finger-containing protein 3 OS=Mus musculus GN=Zzz3 PE=1 SV=1|ZZ-type zinc finger-containing protein 3 OS=Mus musculus GN=Zzz3 PE=1 SV=2	3	2	-0.535277	0.0232711	0.19529	(DKO_1 - WT) - (DKO_2 - WT)	no hit
Plppr1	Q8BFZ2|Q8BFZ2-2	Phospholipid phosphatase-related protein type 1 OS=Mus musculus GN=Plppr1 PE=1 SV=1|Isoform 2 of Phospholipid phosphatase-related protein type 1 OS=Mus musculus GN=Plppr1	3	2	-0.535016	0.00404671	0.083602	(DKO_1 - WT) - (DKO_2 - WT)	no hit
Sorbs3	Q9R1Z8	Vinexin OS=Mus musculus GN=Sorbs3 PE=1 SV=1	3	2	-0.534994	0.00098955	0.0445778	(DKO_1 - WT) - (DKO_2 - WT)	no hit
Slc9a3r1	P70441	Na(+)/H(+) exchange regulatory cofactor NHE-RF1 OS=Mus musculus GN=Slc9a3r1 PE=1 SV=3	3	2	-0.534316	0.00712988	0.101652	DKO_1 - WT	no hit
Lpp	Q8BFW7	Lipoma-preferred partner homolog OS=Mus musculus GN=Lpp PE=1 SV=1	3	2	-0.534104	0.00457839	0.0882071	(DKO_1 - WT) - (DKO_2 - WT)	no hit
Mmp14	P53690	Matrix metalloproteinase-14 OS=Mus musculus GN=Mmp14 PE=2 SV=3	3	2	-0.533484	0.000971502	0.0443812	(DKO_1 - WT) - (DKO_2 - WT)	no hit
Col18a1	E9QPX1|P39061|P39061-1|P39061-2	Collagen alpha-1(XVIII) chain OS=Mus musculus GN=Col18a1 PE=1 SV=1|Collagen alpha-1(XVIII) chain OS=Mus musculus GN=Col18a1 PE=1 SV=4|Isoform 2 of Collagen alpha-1(XVIII) chain OS=Mus musculus GN=Col18a1|Isoform 3 of Collagen alpha-1(XVIII) chain OS=Mus musculus GN=Col18a1	3	2	-0.532905	0.000313142	0.0169279	DKO_1 - WT	no hit
Nexn	A0A0G2JEX1|A0A0G2JFD8|Q7TPW1	Nexilin OS=Mus musculus GN=Nexn PE=1 SV=1|Nexilin OS=Mus musculus GN=Nexn PE=1 SV=1|Nexilin OS=Mus musculus GN=Nexn PE=1 SV=3	3	2	-0.531313	0.000679212	0.0257664	DKO_1 - WT	no hit
Slc25a16	D3YVC9|Q8C0K5	Graves disease carrier protein homolog (Fragment) OS=Mus musculus GN=Slc25a16 PE=1 SV=1|Graves disease carrier protein homolog OS=Mus musculus GN=Slc25a16 PE=1 SV=1	3	2	-0.528972	0.000985201	0.0323179	DKO_1 - WT	no hit
Prorsd1	Q9D820	Prolyl-tRNA synthetase associated domain-containing protein 1 OS=Mus musculus GN=Prorsd1 PE=1 SV=1	3	2	-0.528775	0.000302402	0.0272455	(DKO_1 - WT) - (DKO_2 - WT)	no hit
Itpr3	P70227	Inositol 1,4,5-trisphosphate receptor type 3 OS=Mus musculus GN=Itpr3 PE=1 SV=3	3	2	-0.528098	0.000512178	0.0215044	DKO_1 - WT	no hit
Lifr	P42703	Leukemia inhibitory factor receptor OS=Mus musculus GN=Lifr PE=1 SV=1	3	2	-0.527573	0.00122107	0.0365028	DKO_1 - WT	no hit
Pgm5	Q8BZF8	Phosphoglucomutase-like protein 5 OS=Mus musculus GN=Pgm5 PE=1 SV=2	3	2	-0.527481	0.00107095	0.0457056	(DKO_1 - WT) - (DKO_2 - WT)	no hit
Hoxb9	P20615	Homeobox protein Hox-B9 OS=Mus musculus GN=Hoxb9 PE=2 SV=3	3	2	-0.527398	0.000558174	0.022214	DKO_1 - WT	no hit
Zdhhc20	Q5Y5T1|Q5Y5T1-2	Probable palmitoyltransferase ZDHHC20 OS=Mus musculus GN=Zdhhc20 PE=1 SV=1|Isoform 2 of Probable palmitoyltransferase ZDHHC20 OS=Mus musculus GN=Zdhhc20	3	2	-0.526222	0.000553834	0.0221773	DKO_1 - WT	no hit
Dnmt3b	O88509|O88509-2|Q3KR45	DNA (cytosine-5)-methyltransferase 3B OS=Mus musculus GN=Dnmt3b PE=1 SV=2|Isoform 2 of DNA (cytosine-5)-methyltransferase 3B OS=Mus musculus GN=Dnmt3b|DNA (cytosine-5)-methyltransferase 3B OS=Mus musculus GN=Dnmt3b PE=1 SV=1	3	2	-0.525596	0.00035541	0.0179545	DKO_1 - WT	no hit
Gnb4	P29387	Guanine nucleotide-binding protein subunit beta-4 OS=Mus musculus GN=Gnb4 PE=1 SV=4	3	2	-0.525451	0.00730752	0.110499	(DKO_1 - WT) - (DKO_2 - WT)	no hit
Ncs1	Q8BNY6	Neuronal calcium sensor 1 OS=Mus musculus GN=Ncs1 PE=1 SV=3	3	2	-0.524926	0.00608107	0.10167	(DKO_1 - WT) - (DKO_2 - WT)	no hit
Add3	Q9QYB5-2	Isoform 1 of Gamma-adducin OS=Mus musculus GN=Add3	3	2	-0.524864	0.000968054	0.0443812	(DKO_1 - WT) - (DKO_2 - WT)	no hit
Epha3	Q8BRB1	Eph receptor A3 OS=Mus musculus GN=Epha3 PE=1 SV=1	3	2	-0.524693	0.00139595	0.274409	DKO_2 - WT	no hit
Emilin1	Q99K41	EMILIN-1 OS=Mus musculus GN=Emilin1 PE=1 SV=1	3	2	-0.523938	0.000575703	0.0346449	(DKO_1 - WT) - (DKO_2 - WT)	no hit
Mdk	P12025	Midkine OS=Mus musculus GN=Mdk PE=2 SV=2	3	2	-0.522994	0.00882043	0.121225	(DKO_1 - WT) - (DKO_2 - WT)	no hit
Efnb3	O35393|Q543Q7	Ephrin-B3 OS=Mus musculus GN=Efnb3 PE=1 SV=1|Ephrin B3 OS=Mus musculus GN=Efnb3 PE=1 SV=1	3	2	-0.522917	0.000754284	0.0382269	(DKO_1 - WT) - (DKO_2 - WT)	no hit
Lpl	P11152	Lipoprotein lipase OS=Mus musculus GN=Lpl PE=1 SV=3	3	2	-0.521876	0.000318971	0.0171005	DKO_1 - WT	no hit
Itm2a	Q61500	Integral membrane protein 2A OS=Mus musculus GN=Itm2a PE=2 SV=2	3	2	-0.52168	0.00274028	0.355523	DKO_2 - WT	no hit
Il6st	Q00560|V9GX00	Interleukin-6 receptor subunit beta OS=Mus musculus GN=Il6st PE=1 SV=2|Interleukin-6 receptor subunit beta OS=Mus musculus GN=Il6st PE=1 SV=1	3	2	-0.520902	0.00124291	0.0482799	(DKO_1 - WT) - (DKO_2 - WT)	no hit
Zzz3	D3YTT9|Q6KAQ7	ZZ-type zinc finger-containing protein 3 OS=Mus musculus GN=Zzz3 PE=1 SV=1|ZZ-type zinc finger-containing protein 3 OS=Mus musculus GN=Zzz3 PE=1 SV=2	3	2	-0.520303	0.0264924	0.202422	DKO_1 - WT	no hit
P3h3	Q8CG70	Prolyl 3-hydroxylase 3 OS=Mus musculus GN=P3h3 PE=1 SV=1	3	2	-0.519056	0.00222012	0.0631052	(DKO_1 - WT) - (DKO_2 - WT)	no hit
Vangl1	F8WI52|Q80Z96	Vang-like protein 1 OS=Mus musculus GN=Vangl1 PE=1 SV=2|Vang-like protein 1 OS=Mus musculus GN=Vangl1 PE=1 SV=2	3	2	-0.518846	0.000469383	0.020731	DKO_1 - WT	no hit
Serpinh1	A0A140LHR4|P19324	Serpin H1 (Fragment) OS=Mus musculus GN=Serpinh1 PE=1 SV=1|Serpin H1 OS=Mus musculus GN=Serpinh1 PE=1 SV=3	3	2	-0.517939	0.000455221	0.03318	(DKO_1 - WT) - (DKO_2 - WT)	no hit
Mfap3|Mfap3l	A0A0R4J1C7|Q922T2|Q9D3X9|Q9D3X9-2	Microfibril-associated glycoprotein 3 OS=Mus musculus GN=Mfap3 PE=1 SV=1|Microfibril-associated glycoprotein 3 OS=Mus musculus GN=Mfap3 PE=2 SV=1|Microfibrillar-associated protein 3-like OS=Mus musculus GN=Mfap3l PE=1 SV=1|Isoform 2 of Microfibrillar-associated protein 3-like OS=Mus musculus GN=Mfap3l	3	2	-0.517843	0.0121966	0.134583	DKO_1 - WT	no hit
Tnfaip8	D3YWJ5|D3Z312|D3Z325|J3QM73|Q921Z5	Tumor necrosis factor alpha-induced protein 8 OS=Mus musculus GN=Tnfaip8 PE=1 SV=1|Tumor necrosis factor alpha-induced protein 8 OS=Mus musculus GN=Tnfaip8 PE=1 SV=1|Tumor necrosis factor alpha-induced protein 8 OS=Mus musculus GN=Tnfaip8 PE=1 SV=1|Tumor necrosis factor alpha-induced protein 8 (Fragment) OS=Mus musculus GN=Tnfaip8 PE=1 SV=1|Tumor necrosis factor alpha-induced protein 8 OS=Mus mus…	3	2	-0.516221	0.000469779	0.020731	DKO_1 - WT	no hit
Mipep	A6H611	Mitochondrial intermediate peptidase OS=Mus musculus GN=Mipep PE=1 SV=1	3	2	-0.516203	0.00235543	0.0650199	(DKO_1 - WT) - (DKO_2 - WT)	no hit
Flrt2	Q8BLU0	Leucine-rich repeat transmembrane protein FLRT2 OS=Mus musculus GN=Flrt2 PE=1 SV=1	3	2	-0.51592	0.000779504	0.0386687	(DKO_1 - WT) - (DKO_2 - WT)	no hit
Cald1	E9Q0M9|E9QA16|Q8VCQ8|S4R1T7	Protein Cald1 OS=Mus musculus GN=Cald1 PE=1 SV=1|Protein Cald1 OS=Mus musculus GN=Cald1 PE=1 SV=1|Caldesmon 1 OS=Mus musculus GN=Cald1 PE=1 SV=1|Protein Cald1 OS=Mus musculus GN=Cald1 PE=1 SV=1	3	2	-0.51578	0.000513483	0.0215044	DKO_1 - WT	no hit
Pcdhgc3	Q91XX1	Protein Pcdhgc3 OS=Mus musculus GN=Pcdhgc3 PE=1 SV=1	3	2	-0.515395	0.00241002	0.0655837	(DKO_1 - WT) - (DKO_2 - WT)	no hit
Aldh1a2	Q62148	Retinal dehydrogenase 2 OS=Mus musculus GN=Aldh1a2 PE=1 SV=2	3	2	-0.514831	0.000991407	0.0323179	DKO_1 - WT	no hit
Traf2	P39429|P39429-2	TNF receptor-associated factor 2 OS=Mus musculus GN=Traf2 PE=1 SV=1|Isoform 2 of TNF receptor-associated factor 2 OS=Mus musculus GN=Traf2	3	2	-0.514613	0.00386656	0.0817016	(DKO_1 - WT) - (DKO_2 - WT)	no hit
Col26a1	Q91VF6|Q91VF6-2	Collagen alpha-1(XXVI) chain OS=Mus musculus GN=Col26a1 PE=1 SV=1|Isoform 2 of Collagen alpha-1(XXVI) chain OS=Mus musculus GN=Col26a1	3	2	-0.514403	0.00114107	0.0472503	(DKO_1 - WT) - (DKO_2 - WT)	no hit
Cdkn1b	P46414	Cyclin-dependent kinase inhibitor 1B OS=Mus musculus GN=Cdkn1b PE=1 SV=2	3	2	-0.513446	0.00160148	0.0525172	(DKO_1 - WT) - (DKO_2 - WT)	no hit
Snrpf	P62307|Q497K3	Small nuclear ribonucleoprotein F OS=Mus musculus GN=Snrpf PE=1 SV=1|MCG4969 OS=Mus musculus GN=Snrpf PE=1 SV=1	3	2	-0.513161	0.000476679	0.0208934	DKO_1 - WT	no hit
Atp13a2	Q9CTG6	Probable cation-transporting ATPase 13A2 OS=Mus musculus GN=Atp13a2 PE=2 SV=3	3	2	-0.513062	0.0157024	0.161174	(DKO_1 - WT) - (DKO_2 - WT)	no hit
Vamp8	A0A0R4J0R1|O70404	Vesicle-associated membrane protein 8 OS=Mus musculus GN=Vamp8 PE=1 SV=1|Vesicle-associated membrane protein 8 OS=Mus musculus GN=Vamp8 PE=1 SV=1	3	2	-0.512207	0.000548991	0.0221199	DKO_1 - WT	no hit
Txndc5	E9PXX7|Q3TEE8|Q91W90	Thioredoxin domain-containing protein 5 OS=Mus musculus GN=Txndc5 PE=1 SV=1|Thioredoxin domain-containing protein 5 OS=Mus musculus GN=Txndc5 PE=1 SV=1|Thioredoxin domain-containing protein 5 OS=Mus musculus GN=Txndc5 PE=1 SV=2	3	2	-0.511864	0.000388102	0.0190408	DKO_1 - WT	no hit
Eef1a2	P62631	Elongation factor 1-alpha 2 OS=Mus musculus GN=Eef1a2 PE=1 SV=1	3	2	-0.510942	0.0103635	0.124267	DKO_1 - WT	no hit
Tpm2	P58774	Tropomyosin beta chain OS=Mus musculus GN=Tpm2 PE=1 SV=1	3	2	-0.510634	0.00939691	0.119259	DKO_1 - WT	no hit
Slc16a1	P53986|Q544N9	Monocarboxylate transporter 1 OS=Mus musculus GN=Slc16a1 PE=1 SV=1|Monocarboxylate transporter 1 OS=Mus musculus GN=Slc16a1 PE=1 SV=1	3	2	-0.510601	0.000466482	0.168115	DKO_2 - WT	no hit
Cd248	Q91V98	Endosialin OS=Mus musculus GN=Cd248 PE=1 SV=1	3	2	-0.510069	0.00136287	0.049473	(DKO_1 - WT) - (DKO_2 - WT)	no hit
Pdgfra	P26618	Platelet-derived growth factor receptor alpha OS=Mus musculus GN=Pdgfra PE=1 SV=3	3	2	-0.509498	0.00126987	0.0487433	(DKO_1 - WT) - (DKO_2 - WT)	no hit
Cldn4	O35054|Q3UM35	Claudin-4 OS=Mus musculus GN=Cldn4 PE=1 SV=1|Claudin OS=Mus musculus GN=Cldn4 PE=2 SV=1	3	2	-0.509307	0.000380178	0.154139	DKO_2 - WT	no hit
Slc38a2	Q8CFE6	Sodium-coupled neutral amino acid transporter 2 OS=Mus musculus GN=Slc38a2 PE=1 SV=1	3	2	-0.508382	0.00181536	0.0463631	DKO_1 - WT	no hit
S100a10	P08207|Q3TC45	Protein S100-A10 OS=Mus musculus GN=S100a10 PE=1 SV=2|Protein S100-A10 OS=Mus musculus GN=S100a10 PE=1 SV=1	3	2	-0.507744	0.000574057	0.0346449	(DKO_1 - WT) - (DKO_2 - WT)	no hit
Atp2b4	Q6Q477	Plasma membrane calcium-transporting ATPase 4 OS=Mus musculus GN=Atp2b4 PE=1 SV=1	3	2	-0.507661	0.000524984	0.0346449	(DKO_1 - WT) - (DKO_2 - WT)	no hit
Prkg1	P0C605	cGMP-dependent protein kinase 1 OS=Mus musculus GN=Prkg1 PE=1 SV=1	3	2	-0.507128	0.00194955	0.0483291	DKO_1 - WT	no hit
Cpox	P36552	Oxygen-dependent coproporphyrinogen-III oxidase, mitochondrial OS=Mus musculus GN=Cpox PE=1 SV=2	3	2	-0.506267	0.000542541	0.0221199	DKO_1 - WT	no hit
Snx17	Q8BVL3	Sorting nexin-17 OS=Mus musculus GN=Snx17 PE=1 SV=2	3	2	-0.505414	0.00331829	0.0757948	(DKO_1 - WT) - (DKO_2 - WT)	no hit
Tm7sf3	A0A0R4J0K4|Q9CRG1	Transmembrane 7 superfamily member 3 OS=Mus musculus GN=Tm7sf3 PE=1 SV=1|Transmembrane 7 superfamily member 3 OS=Mus musculus GN=Tm7sf3 PE=2 SV=2	3	2	-0.505341	0.00320764	0.0653003	DKO_1 - WT	no hit
Pcdh18	Q8VHR0	Protocadherin 18 OS=Mus musculus GN=Pcdh18 PE=1 SV=2	3	2	-0.505074	0.0027242	0.069526	(DKO_1 - WT) - (DKO_2 - WT)	no hit
Jade1	Q6ZPI0	Protein Jade-1 OS=Mus musculus GN=Jade1 PE=1 SV=2	3	2	-0.504946	0.000726828	0.0267894	DKO_1 - WT	no hit
Tdh	Q8K3F7	L-threonine 3-dehydrogenase, mitochondrial OS=Mus musculus GN=Tdh PE=1 SV=1	3	2	-0.504764	0.000526706	0.0216888	DKO_1 - WT	no hit
Aldh1a2	Q62148	Retinal dehydrogenase 2 OS=Mus musculus GN=Aldh1a2 PE=1 SV=2	3	2	-0.504611	0.00114356	0.0472503	(DKO_1 - WT) - (DKO_2 - WT)	no hit
Syne1	Q6ZWR6|Q6ZWR6-4	Nesprin-1 OS=Mus musculus GN=Syne1 PE=1 SV=2|Isoform 4 of Nesprin-1 OS=Mus musculus GN=Syne1	3	2	-0.503874	0.00448583	0.0882071	(DKO_1 - WT) - (DKO_2 - WT)	no hit
Rnf213	A0A171EBL2|E9Q555	E3 ubiquitin-protein ligase RNF213 OS=Mus musculus GN=Rnf213 PE=4 SV=1|E3 ubiquitin-protein ligase RNF213 OS=Mus musculus GN=Rnf213 PE=1 SV=2	3	2	-0.503716	0.00056532	0.0346449	(DKO_1 - WT) - (DKO_2 - WT)	no hit
Unc5d	Q8K1S2	Netrin receptor UNC5D OS=Mus musculus GN=Unc5d PE=1 SV=1	3	2	-0.5037	0.00134062	0.0491334	(DKO_1 - WT) - (DKO_2 - WT)	no hit
Gas1	A0A0R4J0T7|Q01721	Growth arrest-specific protein 1 OS=Mus musculus GN=Gas1 PE=1 SV=1|Growth arrest-specific protein 1 OS=Mus musculus GN=Gas1 PE=2 SV=2	3	2	-0.50331	0.00154709	0.0524789	(DKO_1 - WT) - (DKO_2 - WT)	no hit
Plppr1	Q8BFZ2|Q8BFZ2-2	Phospholipid phosphatase-related protein type 1 OS=Mus musculus GN=Plppr1 PE=1 SV=1|Isoform 2 of Phospholipid phosphatase-related protein type 1 OS=Mus musculus GN=Plppr1	3	2	-0.502978	0.00588107	0.0912692	DKO_1 - WT	no hit
Ackr3	P56485	Atypical chemokine receptor 3 OS=Mus musculus GN=Ackr3 PE=1 SV=2	3	2	-0.501746	0.00231327	0.319281	DKO_2 - WT	no hit
Gpc3	Q3TWB2|Q8CFZ4	Glypican 3 OS=Mus musculus GN=Gpc3 PE=1 SV=1|Glypican-3 OS=Mus musculus GN=Gpc3 PE=2 SV=1	3	2	-0.500684	0.000492342	0.0211511	DKO_1 - WT	no hit
Mgst1	E9QJW0|Q53ZD4|Q91VS7	Microsomal glutathione S-transferase 1 OS=Mus musculus GN=Mgst1 PE=1 SV=1|Microsomal glutathione S-transferase 1 OS=Mus musculus GN=Mgst1 PE=1 SV=1|Microsomal glutathione S-transferase 1 OS=Mus musculus GN=Mgst1 PE=1 SV=3	3	2	-0.500524	0.00654067	0.104753	(DKO_1 - WT) - (DKO_2 - WT)	no hit
Parva	Q3UF75|Q9EPC1	Alpha-parvin OS=Mus musculus GN=Parva PE=1 SV=1|Alpha-parvin OS=Mus musculus GN=Parva PE=1 SV=1	3	2	-0.498498	0.000950316	0.0319414	DKO_1 - WT	no hit
Tgfb3	P17125|Q91YU7	Transforming growth factor beta-3 OS=Mus musculus GN=Tgfb3 PE=2 SV=1|Transforming growth factor beta-3 OS=Mus musculus GN=Tgfb3 PE=1 SV=1	3	2	-0.497837	0.00498758	0.0831783	DKO_1 - WT	no hit
Notch1	Q01705|Q01705-3|Q01705-4	Neurogenic locus notch homolog protein 1 OS=Mus musculus GN=Notch1 PE=1 SV=3|Isoform 3 of Neurogenic locus notch homolog protein 1 OS=Mus musculus GN=Notch1|Isoform 4 of Neurogenic locus notch homolog protein 1 OS=Mus musculus GN=Notch1	3	2	-0.496889	0.00213062	0.30714	DKO_2 - WT	no hit
Tdh	Q8K3F7	L-threonine 3-dehydrogenase, mitochondrial OS=Mus musculus GN=Tdh PE=1 SV=1	3	2	-0.496627	0.000594902	0.192957	DKO_2 - WT	no hit
Anxa6	F8WIT2|P14824	Annexin OS=Mus musculus GN=Anxa6 PE=1 SV=1|Annexin A6 OS=Mus musculus GN=Anxa6 PE=1 SV=3	3	2	-0.495771	0.000821666	0.0291265	DKO_1 - WT	no hit
Rpl19	A2A547|P84099|Q5I0T8	Ribosomal protein L19 OS=Mus musculus GN=Rpl19 PE=1 SV=1|60S ribosomal protein L19 OS=Mus musculus GN=Rpl19 PE=1 SV=1|Ribosomal protein L19 OS=Mus musculus GN=Rpl19 PE=1 SV=1	3	2	-0.495655	0.000944849	0.239799	DKO_2 - WT	no hit
Fzd2	Q9JIP6	Frizzled-2 OS=Mus musculus GN=Fzd2 PE=2 SV=1	3	2	-0.495179	0.00211528	0.0505041	DKO_1 - WT	no hit
Bst2	Q8R2Q8	Bone marrow stromal antigen 2 OS=Mus musculus GN=Bst2 PE=1 SV=1	3	2	-0.494812	0.00181706	0.287495	DKO_2 - WT	no hit
Acvr1	P37172	Activin receptor type-1 OS=Mus musculus GN=Acvr1 PE=2 SV=2	3	2	-0.494323	0.00150502	0.0411945	DKO_1 - WT	no hit
Shoc2	O88520	Leucine-rich repeat protein SHOC-2 OS=Mus musculus GN=Shoc2 PE=1 SV=2	3	2	-0.493681	0.0178655	0.169496	(DKO_1 - WT) - (DKO_2 - WT)	no hit
Gsn	P13020-2	Isoform 2 of Gelsolin OS=Mus musculus GN=Gsn	3	2	-0.493519	0.0007964	0.0386687	(DKO_1 - WT) - (DKO_2 - WT)	no hit
Col6a3	E9PWQ3	Protein Col6a3 OS=Mus musculus GN=Col6a3 PE=1 SV=2	3	2	-0.493128	0.000511977	0.1748	DKO_2 - WT	no hit
Lgals1	P16045	Galectin-1 OS=Mus musculus GN=Lgals1 PE=1 SV=3	3	2	-0.492975	0.000742987	0.0270773	DKO_1 - WT	no hit
Bcam	Q9R069	Basal cell adhesion molecule OS=Mus musculus GN=Bcam PE=1 SV=1	3	2	-0.491217	0.000548202	0.0221199	DKO_1 - WT	no hit
Axl	Q00993|Q6PE80	Tyrosine-protein kinase receptor UFO OS=Mus musculus GN=Axl PE=1 SV=2|Axl protein OS=Mus musculus GN=Axl PE=1 SV=1	3	2	-0.491074	0.00205859	0.0502032	DKO_1 - WT	no hit
Gpx8	Q9D7B7	Probable glutathione peroxidase 8 OS=Mus musculus GN=Gpx8 PE=1 SV=1	3	2	-0.490885	0.000819867	0.0291265	DKO_1 - WT	no hit
Tgfb3	P17125|Q91YU7	Transforming growth factor beta-3 OS=Mus musculus GN=Tgfb3 PE=2 SV=1|Transforming growth factor beta-3 OS=Mus musculus GN=Tgfb3 PE=1 SV=1	3	2	-0.489336	0.00553027	0.0967423	(DKO_1 - WT) - (DKO_2 - WT)	no hit
Zfyve9	A0S860|A2A8R0|A8Y5G5	Protein Zfyve9 OS=Mus musculus GN=Zfyve9 PE=1 SV=1|MCG17975 OS=Mus musculus GN=Zfyve9 PE=1 SV=1|Protein Zfyve9 OS=Mus musculus GN=Zfyve9 PE=1 SV=1	3	2	-0.488795	0.00156943	0.0524789	(DKO_1 - WT) - (DKO_2 - WT)	no hit
Tinagl1	H3BJ97|Q99JR5	Tubulointerstitial nephritis antigen-like OS=Mus musculus GN=Tinagl1 PE=1 SV=1|Tubulointerstitial nephritis antigen-like OS=Mus musculus GN=Tinagl1 PE=1 SV=1	3	2	-0.488495	0.00320628	0.371414	DKO_2 - WT	no hit
Actbl2	Q8BFZ3	Beta-actin-like protein 2 OS=Mus musculus GN=Actbl2 PE=1 SV=1	3	2	-0.48815	0.0845309	0.369261	(DKO_1 - WT) - (DKO_2 - WT)	no hit
Stat3	P42227|P42227-2|P42227-3	Signal transducer and activator of transcription 3 OS=Mus musculus GN=Stat3 PE=1 SV=2|Isoform Stat3B of Signal transducer and activator of transcription 3 OS=Mus musculus GN=Stat3|Isoform Del-701 of Signal transducer and activator of transcription 3 OS=Mus musculus GN=Stat3	3	2	-0.487106	0.000664806	0.036253	(DKO_1 - WT) - (DKO_2 - WT)	no hit
Dnajc1	Q61712	DnaJ homolog subfamily C member 1 OS=Mus musculus GN=Dnajc1 PE=1 SV=1	3	2	-0.486368	0.00236404	0.0538089	DKO_1 - WT	no hit
Abcb1b|Abcb1a	B2RUR3|P06795|P21447	ATP-binding cassette, sub-family B (MDR/TAP), member 1B OS=Mus musculus GN=Abcb1b PE=1 SV=1|Multidrug resistance protein 1B OS=Mus musculus GN=Abcb1b PE=1 SV=1|Multidrug resistance protein 1A OS=Mus musculus GN=Abcb1a PE=1 SV=3	3	2	-0.485957	0.00119016	0.0362467	DKO_1 - WT	no hit
Tpd52l2	A2AUD5|Q3TAI4|Q9CYZ2	Tumor protein D54 OS=Mus musculus GN=Tpd52l2 PE=1 SV=1|Tumor protein D52-like 2, isoform CRA_c OS=Mus musculus GN=Tpd52l2 PE=1 SV=1|Tumor protein D54 OS=Mus musculus GN=Tpd52l2 PE=1 SV=1	3	2	-0.485819	0.000884977	0.030215	DKO_1 - WT	no hit
Pcsk5	Q04592|Q04592-2	Proprotein convertase subtilisin/kexin type 5 OS=Mus musculus GN=Pcsk5 PE=1 SV=3|Isoform PC5A of Proprotein convertase subtilisin/kexin type 5 OS=Mus musculus GN=Pcsk5	3	2	-0.485492	0.000881895	0.030215	DKO_1 - WT	no hit
Tbc1d9b	Q5SVR0|Q5SVR0-2	TBC1 domain family member 9B OS=Mus musculus GN=Tbc1d9b PE=1 SV=1|Isoform 2 of TBC1 domain family member 9B OS=Mus musculus GN=Tbc1d9b	3	2	-0.484949	0.00121797	0.0477195	(DKO_1 - WT) - (DKO_2 - WT)	no hit
Emilin2	Q3U1J9|Q8K482	EMILIN-2 OS=Mus musculus GN=Emilin2 PE=1 SV=1|EMILIN-2 OS=Mus musculus GN=Emilin2 PE=1 SV=1	3	2	-0.484414	0.00189341	0.292441	DKO_2 - WT	no hit
Nefh	P19246	Neurofilament heavy polypeptide OS=Mus musculus GN=Nefh PE=1 SV=3	3	2	-0.484265	0.00371551	0.0795639	(DKO_1 - WT) - (DKO_2 - WT)	no hit
Bend3	Q6PAL0	BEN domain-containing protein 3 OS=Mus musculus GN=Bend3 PE=1 SV=1	3	2	-0.484131	0.00544066	0.511254	DKO_2 - WT	no hit
Bet1l	O35153	BET1-like protein OS=Mus musculus GN=Bet1l PE=1 SV=1	3	2	-0.483142	0.00375989	0.0709775	DKO_1 - WT	no hit
Ncs1	Q8BNY6	Neuronal calcium sensor 1 OS=Mus musculus GN=Ncs1 PE=1 SV=3	3	2	-0.482255	0.00983514	0.12199	DKO_1 - WT	no hit
Fkbp10	Q61576	Peptidyl-prolyl cis-trans isomerase FKBP10 OS=Mus musculus GN=Fkbp10 PE=1 SV=2	3	2	-0.481602	0.000586041	0.0348723	(DKO_1 - WT) - (DKO_2 - WT)	no hit
Pcgf6	Q99NA9	Polycomb group RING finger protein 6 OS=Mus musculus GN=Pcgf6 PE=1 SV=1	3	2	-0.480619	0.000806297	0.0386687	(DKO_1 - WT) - (DKO_2 - WT)	no hit
Slit2	A0A140T8T2|G3UYX7	Slit homolog 2 protein OS=Mus musculus GN=Slit2 PE=1 SV=1|Slit homolog 2 protein OS=Mus musculus GN=Slit2 PE=1 SV=1	3	2	-0.480062	0.00252946	0.0672827	(DKO_1 - WT) - (DKO_2 - WT)	no hit
Thbs1	Q80YQ1	Thrombospondin 1 OS=Mus musculus GN=Thbs1 PE=1 SV=1	3	2	-0.479822	0.00351392	0.0777503	(DKO_1 - WT) - (DKO_2 - WT)	no hit
Vnn1	Q9Z0K8	Pantetheinase OS=Mus musculus GN=Vnn1 PE=1 SV=3	3	2	-0.479489	0.00167084	0.285231	DKO_2 - WT	no hit
Fkbp14	P59024|Q542Q0	Peptidyl-prolyl cis-trans isomerase FKBP14 OS=Mus musculus GN=Fkbp14 PE=1 SV=1|FK506 binding protein 14, isoform CRA_a OS=Mus musculus GN=Fkbp14 PE=1 SV=1	3	2	-0.478878	0.000713187	0.0265887	DKO_1 - WT	no hit
Mrc2	Q64449	C-type mannose receptor 2 OS=Mus musculus GN=Mrc2 PE=1 SV=3	3	2	-0.478718	0.000667198	0.036253	(DKO_1 - WT) - (DKO_2 - WT)	no hit
Actn4	E9Q2W9|P57780|Q3ULT2	Alpha-actinin-4 (Fragment) OS=Mus musculus GN=Actn4 PE=1 SV=1|Alpha-actinin-4 OS=Mus musculus GN=Actn4 PE=1 SV=1|Actinin alpha 4 OS=Mus musculus GN=Actn4 PE=1 SV=1	3	2	-0.47783	0.00121721	0.0365028	DKO_1 - WT	no hit
Fkbp9	Q9Z247	Peptidyl-prolyl cis-trans isomerase FKBP9 OS=Mus musculus GN=Fkbp9 PE=1 SV=1	3	2	-0.476041	0.000843515	0.0295777	DKO_1 - WT	no hit
Rrbp1	A2AVJ7|Q99PL5	Ribosome-binding protein 1 OS=Mus musculus GN=Rrbp1 PE=1 SV=1|Ribosome-binding protein 1 OS=Mus musculus GN=Rrbp1 PE=1 SV=2	3	2	-0.475829	0.00124139	0.03694	DKO_1 - WT	no hit
Stom	P54116	Erythrocyte band 7 integral membrane protein OS=Mus musculus GN=Stom PE=1 SV=3	3	2	-0.475126	0.00103487	0.0454524	(DKO_1 - WT) - (DKO_2 - WT)	no hit
Nbea	Q9EPN1|Q9EPN1-4	Neurobeachin OS=Mus musculus GN=Nbea PE=1 SV=1|Isoform 4 of Neurobeachin OS=Mus musculus GN=Nbea	3	2	-0.474953	0.00101952	0.0329038	DKO_1 - WT	no hit
Mmp16	Q9WTR0	Matrix metalloproteinase-16 OS=Mus musculus GN=Mmp16 PE=2 SV=3	3	2	-0.47486	0.000865048	0.0301697	DKO_1 - WT	no hit
Slit3	Q9WVB4	Slit homolog 3 protein OS=Mus musculus GN=Slit3 PE=2 SV=2	3	2	-0.474666	0.0015467	0.0524789	(DKO_1 - WT) - (DKO_2 - WT)	no hit
Tpx2	A2APB8	Targeting protein for Xklp2 OS=Mus musculus GN=Tpx2 PE=1 SV=1	3	2	-0.474444	0.000963925	0.0322319	DKO_1 - WT	no hit
Col6a2	Q02788	Collagen alpha-2(VI) chain OS=Mus musculus GN=Col6a2 PE=1 SV=3	3	2	-0.47435	0.000722714	0.0267894	DKO_1 - WT	no hit
Epb41l3	Q9WV92-2|Q9WV92-3|Q9WV92-5|Q9WV92-7	Isoform 2 of Band 4.1-like protein 3 OS=Mus musculus GN=Epb41l3|Isoform 3 of Band 4.1-like protein 3 OS=Mus musculus GN=Epb41l3|Isoform 5 of Band 4.1-like protein 3 OS=Mus musculus GN=Epb41l3|Isoform 7 of Band 4.1-like protein 3 OS=Mus musculus GN=Epb41l3	3	2	-0.474269	0.00117194	0.0362016	DKO_1 - WT	no hit
Tmem163	Q8C996	Transmembrane protein 163 OS=Mus musculus GN=Tmem163 PE=1 SV=1	3	2	-0.474195	0.00132632	0.0491334	(DKO_1 - WT) - (DKO_2 - WT)	no hit
Itm2c	A0A087WRM2|Q91VK4	Integral membrane protein 2C OS=Mus musculus GN=Itm2c PE=1 SV=1|Integral membrane protein 2C OS=Mus musculus GN=Itm2c PE=1 SV=2	3	2	-0.47383	0.00664337	0.584367	DKO_2 - WT	no hit
Nexn	A0A0G2JEX1|A0A0G2JFD8|Q7TPW1	Nexilin OS=Mus musculus GN=Nexn PE=1 SV=1|Nexilin OS=Mus musculus GN=Nexn PE=1 SV=1|Nexilin OS=Mus musculus GN=Nexn PE=1 SV=3	3	2	-0.473381	0.0015484	0.0524789	(DKO_1 - WT) - (DKO_2 - WT)	no hit
Capn6	O35646	Calpain-6 OS=Mus musculus GN=Capn6 PE=1 SV=2	3	2	-0.473303	0.0426793	0.258083	DKO_1 - WT	no hit
Vcam1	P29533|Q3UPN1	Vascular cell adhesion protein 1 OS=Mus musculus GN=Vcam1 PE=1 SV=1|Vascular cell adhesion protein 1 OS=Mus musculus GN=Vcam1 PE=1 SV=1	3	2	-0.473272	0.00293815	0.366534	DKO_2 - WT	no hit
Thbs1	Q80YQ1	Thrombospondin 1 OS=Mus musculus GN=Thbs1 PE=1 SV=1	3	2	-0.473037	0.00384246	0.0716266	DKO_1 - WT	no hit
Syap1	Q9D5V6	Synapse-associated protein 1 OS=Mus musculus GN=Syap1 PE=1 SV=1	3	2	-0.472632	0.0027328	0.0581149	DKO_1 - WT	no hit
Slc38a2	Q8CFE6	Sodium-coupled neutral amino acid transporter 2 OS=Mus musculus GN=Slc38a2 PE=1 SV=1	3	2	-0.472587	0.00294173	0.0706779	(DKO_1 - WT) - (DKO_2 - WT)	no hit
Sall4	Q8BX22	Sal-like protein 4 OS=Mus musculus GN=Sall4 PE=1 SV=2	3	2	-0.472204	0.000651182	0.201153	DKO_2 - WT	no hit
Alpl	P09242	Alkaline phosphatase, tissue-nonspecific isozyme OS=Mus musculus GN=Alpl PE=1 SV=2	3	2	-0.472121	0.000717783	0.202446	DKO_2 - WT	no hit
Bend3	Q6PAL0	BEN domain-containing protein 3 OS=Mus musculus GN=Bend3 PE=1 SV=1	3	2	-0.47212	0.00631114	0.0952101	DKO_1 - WT	no hit
Farp1	F8VPU2	FERM, RhoGEF and pleckstrin domain-containing protein 1 OS=Mus musculus GN=Farp1 PE=1 SV=1	3	2	-0.47095	0.000683886	0.0257928	DKO_1 - WT	no hit
Adgre5|Cd97	A0A0D9SEG8|E9QJS7|E9QMJ5|Q9DC42|Q9Z0M6|Q9Z0M6-2|Q9Z0M6-3	Protein Adgre5 OS=Mus musculus GN=Adgre5 PE=1 SV=1|Protein Adgre5 OS=Mus musculus GN=Adgre5 PE=1 SV=1|Protein Adgre5 OS=Mus musculus GN=Adgre5 PE=1 SV=1|Protein Adgre5 OS=Mus musculus GN=Adgre5 PE=1 SV=1|CD97 antigen OS=Mus musculus GN=Cd97 PE=1 SV=2|Isoform 2 of CD97 antigen OS=Mus musculus GN=Cd97|Isoform 3 of CD97 antigen OS=Mus musculus GN=Cd97	3	2	-0.470789	0.000890892	0.0302577	DKO_1 - WT	no hit
Stxbp6	Q3TYA4|Q8R3T5	Syntaxin-binding protein 6 OS=Mus musculus GN=Stxbp6 PE=1 SV=1|Syntaxin-binding protein 6 OS=Mus musculus GN=Stxbp6 PE=1 SV=1	3	2	-0.469717	0.000681805	0.036253	(DKO_1 - WT) - (DKO_2 - WT)	no hit
Trim2	E9QKC6|Q3UHH4|Q9ESN6	Tripartite motif-containing protein 2 OS=Mus musculus GN=Trim2 PE=1 SV=1|Tripartite motif-containing protein 2 OS=Mus musculus GN=Trim2 PE=1 SV=1|Tripartite motif-containing protein 2 OS=Mus musculus GN=Trim2 PE=1 SV=1	3	2	-0.46971	0.000846964	0.228927	DKO_2 - WT	no hit
Col1a2	Q01149|Q3TX57	Collagen alpha-2(I) chain OS=Mus musculus GN=Col1a2 PE=1 SV=2|Collagen alpha-2(I) chain OS=Mus musculus GN=Col1a2 PE=1 SV=1	3	2	-0.468058	0.0256163	0.205405	(DKO_1 - WT) - (DKO_2 - WT)	no hit
Hoxc5	P32043	Homeobox protein Hox-C5 OS=Mus musculus GN=Hoxc5 PE=2 SV=3	3	2	-0.467931	0.00665311	0.105519	(DKO_1 - WT) - (DKO_2 - WT)	no hit
Tgfbi	A1L353|P82198	Transforming growth factor, beta induced OS=Mus musculus GN=Tgfbi PE=1 SV=1|Transforming growth factor-beta-induced protein ig-h3 OS=Mus musculus GN=Tgfbi PE=1 SV=1	3	2	-0.467101	0.000793827	0.0284506	DKO_1 - WT	no hit
Nf2	P46662|P46662-2	Merlin OS=Mus musculus GN=Nf2 PE=1 SV=2|Isoform 2 of Merlin OS=Mus musculus GN=Nf2	3	2	-0.466906	0.000990441	0.0323179	DKO_1 - WT	no hit
Ears2	Q9CXJ1	Probable glutamate--tRNA ligase, mitochondrial OS=Mus musculus GN=Ears2 PE=1 SV=1	3	2	-0.466687	0.00342008	0.0676404	DKO_1 - WT	no hit
Dab2	A0A0R4J104|E9QL31|P98078|P98078-2	Disabled homolog 2 OS=Mus musculus GN=Dab2 PE=1 SV=1|Disabled homolog 2 OS=Mus musculus GN=Dab2 PE=1 SV=1|Disabled homolog 2 OS=Mus musculus GN=Dab2 PE=1 SV=2|Isoform p93 of Disabled homolog 2 OS=Mus musculus GN=Dab2	3	2	-0.466675	0.0011785	0.252419	DKO_2 - WT	no hit
Lum	P51885	Lumican OS=Mus musculus GN=Lum PE=1 SV=2	3	2	-0.466542	0.00307989	0.0632255	DKO_1 - WT	no hit
L1td1	G3UYN0|Q587J6	L1TD1 OS=Mus musculus GN=L1td1 PE=1 SV=1|LINE-1 type transposase domain-containing protein 1 OS=Mus musculus GN=L1td1 PE=2 SV=1	3	2	-0.466364	0.000906278	0.0306199	DKO_1 - WT	no hit
Pcdhgb6	Q91XX4	MCG133388, isoform CRA_n OS=Mus musculus GN=Pcdhgb6 PE=1 SV=1	3	2	-0.464888	0.00379153	0.0709775	DKO_1 - WT	no hit
Slc12a4	F8WIJ0|Q3TWZ6|Q9JIS8	Solute carrier family 12 member 4 OS=Mus musculus GN=Slc12a4 PE=1 SV=2|Solute carrier family 12 member 4 OS=Mus musculus GN=Slc12a4 PE=1 SV=1|Solute carrier family 12 member 4 OS=Mus musculus GN=Slc12a4 PE=1 SV=2	3	2	-0.46463	0.00118049	0.0362467	DKO_1 - WT	no hit
Dlk1	Q09163|Q925U3	Protein delta homolog 1 OS=Mus musculus GN=Dlk1 PE=1 SV=1|Delta-like OS=Mus musculus GN=Dlk1 PE=1 SV=1	3	2	-0.463732	0.0388962	0.96119	DKO_2 - WT	no hit
Marcks	P26645	Myristoylated alanine-rich C-kinase substrate OS=Mus musculus GN=Marcks PE=1 SV=2	3	2	-0.46369	0.00125918	0.0371457	DKO_1 - WT	no hit
Abcb1b|Abcb1a	B2RUR3|P06795|P21447	ATP-binding cassette, sub-family B (MDR/TAP), member 1B OS=Mus musculus GN=Abcb1b PE=1 SV=1|Multidrug resistance protein 1B OS=Mus musculus GN=Abcb1b PE=1 SV=1|Multidrug resistance protein 1A OS=Mus musculus GN=Abcb1a PE=1 SV=3	3	2	-0.463273	0.00165888	0.0538059	(DKO_1 - WT) - (DKO_2 - WT)	no hit
Znhit6	Q3UFB2|Q3UFB2-2	Box C/D snoRNA protein 1 OS=Mus musculus GN=Znhit6 PE=1 SV=2|Isoform 2 of Box C/D snoRNA protein 1 OS=Mus musculus GN=Znhit6	3	2	-0.463082	0.0251948	0.19739	DKO_1 - WT	no hit
Grn	H3BJE0|P28798|Q3U9N4	Granulins (Fragment) OS=Mus musculus GN=Grn PE=1 SV=1|Granulins OS=Mus musculus GN=Grn PE=1 SV=2|Granulins OS=Mus musculus GN=Grn PE=1 SV=1	3	2	-0.463021	0.00172096	0.0451111	DKO_1 - WT	no hit
Polr2g	P62488	DNA-directed RNA polymerase II subunit RPB7 OS=Mus musculus GN=Polr2g PE=1 SV=1	3	2	-0.462921	0.00573208	0.0993765	(DKO_1 - WT) - (DKO_2 - WT)	no hit
L1td1	G3UYN0|Q587J6	L1TD1 OS=Mus musculus GN=L1td1 PE=1 SV=1|LINE-1 type transposase domain-containing protein 1 OS=Mus musculus GN=L1td1 PE=2 SV=1	3	2	-0.462574	0.00096112	0.239799	DKO_2 - WT	no hit
Col11a1	Q61245|Q61245-2	Collagen alpha-1(XI) chain OS=Mus musculus GN=Col11a1 PE=1 SV=2|Isoform Short of Collagen alpha-1(XI) chain OS=Mus musculus GN=Col11a1	3	2	-0.462447	0.00309674	0.0728205	(DKO_1 - WT) - (DKO_2 - WT)	no hit
Mtpn	P62774	Myotrophin OS=Mus musculus GN=Mtpn PE=1 SV=2	3	2	-0.462078	0.00517134	0.0935771	(DKO_1 - WT) - (DKO_2 - WT)	no hit
Pdgfrb	E9QN12|E9QPE2|P05622	Platelet-derived growth factor receptor beta OS=Mus musculus GN=Pdgfrb PE=1 SV=1|Platelet-derived growth factor receptor beta OS=Mus musculus GN=Pdgfrb PE=1 SV=1|Platelet-derived growth factor receptor beta OS=Mus musculus GN=Pdgfrb PE=1 SV=1	3	2	-0.462022	0.00418512	0.0851026	(DKO_1 - WT) - (DKO_2 - WT)	no hit
Mipep	A6H611	Mitochondrial intermediate peptidase OS=Mus musculus GN=Mipep PE=1 SV=1	3	2	-0.461213	0.00480848	0.0810198	DKO_1 - WT	no hit
Sorcs2	Q9EPR5	VPS10 domain-containing receptor SorCS2 OS=Mus musculus GN=Sorcs2 PE=1 SV=2	3	2	-0.460873	0.00173689	0.0452499	DKO_1 - WT	no hit
P3h4	Q8K2B0	Synaptonemal complex protein SC65 OS=Mus musculus GN=P3h4 PE=2 SV=1	3	2	-0.460727	0.00453181	0.0792396	DKO_1 - WT	no hit
Fstl1	Q62356	Follistatin-related protein 1 OS=Mus musculus GN=Fstl1 PE=1 SV=2	3	2	-0.460184	0.00585996	0.0997731	(DKO_1 - WT) - (DKO_2 - WT)	no hit
Farp1	F8VPU2	FERM, RhoGEF and pleckstrin domain-containing protein 1 OS=Mus musculus GN=Farp1 PE=1 SV=1	3	2	-0.460151	0.000810689	0.0386687	(DKO_1 - WT) - (DKO_2 - WT)	no hit
Enpp3	Q6DYE8	Ectonucleotide pyrophosphatase/phosphodiesterase family member 3 OS=Mus musculus GN=Enpp3 PE=1 SV=2	3	2	-0.459808	0.00172043	0.286084	DKO_2 - WT	no hit
Pcdhga7	Q6DD96	Protein Pcdhga7 OS=Mus musculus GN=Pcdhga7 PE=2 SV=1	3	2	-0.45946	0.00120573	0.0365028	DKO_1 - WT	no hit
Npr3	P70180	Atrial natriuretic peptide receptor 3 OS=Mus musculus GN=Npr3 PE=1 SV=3	3	2	-0.458542	0.00122113	0.0477195	(DKO_1 - WT) - (DKO_2 - WT)	no hit
Magi2	A0A0G2JE00|Q9WVQ1|Q9WVQ1-2	Membrane-associated guanylate kinase, WW and PDZ domain-containing protein 2 OS=Mus musculus GN=Magi2 PE=1 SV=1|Membrane-associated guanylate kinase, WW and PDZ domain-containing protein 2 OS=Mus musculus GN=Magi2 PE=1 SV=2|Isoform 2 of Membrane-associated guanylate kinase, WW and PDZ domain-containing protein 2 OS=Mus musculus GN=Magi2	3	2	-0.458013	0.00817695	0.116324	(DKO_1 - WT) - (DKO_2 - WT)	no hit
Txnl4a	P83877	Thioredoxin-like protein 4A OS=Mus musculus GN=Txnl4a PE=1 SV=1	3	2	-0.457996	0.00356484	0.0698643	DKO_1 - WT	no hit
Ptn	P63089	Pleiotrophin OS=Mus musculus GN=Ptn PE=1 SV=1	3	2	-0.457423	0.00544837	0.0879194	DKO_1 - WT	no hit
Zdhhc20	Q5Y5T1|Q5Y5T1-2	Probable palmitoyltransferase ZDHHC20 OS=Mus musculus GN=Zdhhc20 PE=1 SV=1|Isoform 2 of Probable palmitoyltransferase ZDHHC20 OS=Mus musculus GN=Zdhhc20	3	2	-0.456491	0.00154071	0.285231	DKO_2 - WT	no hit
Nfib	A2BG75|A2BG76|A2BG77|I7HIP8|P97863|P97863-2|P97863-3	Nuclear factor 1 OS=Mus musculus GN=Nfib PE=1 SV=1|Nuclear factor 1 OS=Mus musculus GN=Nfib PE=1 SV=1|Nuclear factor 1 OS=Mus musculus GN=Nfib PE=1 SV=1|Nuclear factor 1 OS=Mus musculus GN=Nfib PE=1 SV=1|Nuclear factor 1 B-type OS=Mus musculus GN=Nfib PE=1 SV=2|Isoform 2 of Nuclear factor 1 B-type OS=Mus musculus GN=Nfib|Isoform 3 of Nuclear factor 1 B-type OS=Mus musculus GN=Nfib	3	2	-0.456191	0.00121127	0.0477195	(DKO_1 - WT) - (DKO_2 - WT)	no hit
Adamts9	E9PUN6	Protein Adamts9 OS=Mus musculus GN=Adamts9 PE=1 SV=1	3	2	-0.455371	0.00372377	0.0709775	DKO_1 - WT	no hit
Igf2r	Q07113	Cation-independent mannose-6-phosphate receptor OS=Mus musculus GN=Igf2r PE=1 SV=1	3	2	-0.455317	0.00277097	0.0585515	DKO_1 - WT	no hit
Tmem106b	Q80X71	Transmembrane protein 106B OS=Mus musculus GN=Tmem106b PE=1 SV=1	3	2	-0.455302	0.104155	0.407072	(DKO_1 - WT) - (DKO_2 - WT)	no hit
Fam114a1	Q9D281	Protein Noxp20 OS=Mus musculus GN=Fam114a1 PE=1 SV=1	3	2	-0.45486	0.00121409	0.0365028	DKO_1 - WT	no hit
Mdm1	B2RPU6|E9PW14|E9Q0B1|Q9D067|Q9D067-2|Q9D067-4	Mdm1 protein OS=Mus musculus GN=Mdm1 PE=1 SV=1|Nuclear protein MDM1 OS=Mus musculus GN=Mdm1 PE=1 SV=1|Nuclear protein MDM1 OS=Mus musculus GN=Mdm1 PE=1 SV=1|Nuclear protein MDM1 OS=Mus musculus GN=Mdm1 PE=1 SV=2|Isoform 2 of Nuclear protein MDM1 OS=Mus musculus GN=Mdm1|Isoform 4 of Nuclear protein MDM1 OS=Mus musculus GN=Mdm1	3	2	-0.454774	0.0119562	0.139816	(DKO_1 - WT) - (DKO_2 - WT)	no hit
Rcbtb1	A0A0R4J025	RCC1 and BTB domain-containing protein 1 OS=Mus musculus GN=Rcbtb1 PE=1 SV=1	3	2	-0.454349	0.0014999	0.0519788	(DKO_1 - WT) - (DKO_2 - WT)	no hit
Col3a1	P08121|Q3TVI5	Collagen alpha-1(III) chain OS=Mus musculus GN=Col3a1 PE=1 SV=4|Collagen alpha-1(III) chain OS=Mus musculus GN=Col3a1 PE=1 SV=1	3	2	-0.453182	0.0092874	0.635879	DKO_2 - WT	no hit
Lima1	Q9ERG0	LIM domain and actin-binding protein 1 OS=Mus musculus GN=Lima1 PE=1 SV=3	3	2	-0.452559	0.0023968	0.0655837	(DKO_1 - WT) - (DKO_2 - WT)	no hit
Acp6	Q8BP40	Lysophosphatidic acid phosphatase type 6 OS=Mus musculus GN=Acp6 PE=1 SV=1	3	2	-0.451886	0.00442813	0.0786145	DKO_1 - WT	no hit
Mrps17	Q9CQE3	28S ribosomal protein S17, mitochondrial OS=Mus musculus GN=Mrps17 PE=1 SV=1	3	2	-0.451845	0.00271862	0.069526	(DKO_1 - WT) - (DKO_2 - WT)	no hit
Plec	Q9QXS1|Q9QXS1-14|Q9QXS1-2	Plectin OS=Mus musculus GN=Plec PE=1 SV=3|Isoform PLEC-1G of Plectin OS=Mus musculus GN=Plec|Isoform PLEC-1 of Plectin OS=Mus musculus GN=Plec	3	2	-0.45164	0.00193971	0.0483291	DKO_1 - WT	no hit
Uimc1	A0A0R4J073|E9PWM5|E9Q577|Q5U5Q9|Q5U5Q9-2	BRCA1-A complex subunit RAP80 OS=Mus musculus GN=Uimc1 PE=1 SV=1|BRCA1-A complex subunit RAP80 OS=Mus musculus GN=Uimc1 PE=1 SV=1|BRCA1-A complex subunit RAP80 OS=Mus musculus GN=Uimc1 PE=1 SV=1|BRCA1-A complex subunit RAP80 OS=Mus musculus GN=Uimc1 PE=1 SV=2|Isoform 2 of BRCA1-A complex subunit RAP80 OS=Mus musculus GN=Uimc1	3	2	-0.451102	0.00129805	0.0491334	(DKO_1 - WT) - (DKO_2 - WT)	no hit
Tmeff2	Q9QYM9|Q9QYM9-2	Tomoregulin-2 OS=Mus musculus GN=Tmeff2 PE=2 SV=1|Isoform 2 of Tomoregulin-2 OS=Mus musculus GN=Tmeff2	3	2	-0.450437	0.00208687	0.0505041	DKO_1 - WT	no hit
Mtrf1l	Q8BJU9	Peptide chain release factor 1-like, mitochondrial OS=Mus musculus GN=Mtrf1l PE=2 SV=1	3	2	-0.449478	0.00167041	0.0444095	DKO_1 - WT	no hit
Ccbl1|Kyat1	A2AQY8|A2AQY9|Q05CI8|Q8BTY1	Kynurenine--oxoglutarate transaminase 1 OS=Mus musculus GN=Ccbl1 PE=1 SV=1|Kynurenine--oxoglutarate transaminase 1 OS=Mus musculus GN=Ccbl1 PE=1 SV=1|Ccbl1 protein OS=Mus musculus GN=Ccbl1 PE=1 SV=1|Kynurenine--oxoglutarate transaminase 1 OS=Mus musculus GN=Kyat1 PE=1 SV=1	3	2	-0.449234	0.00133599	0.0491334	(DKO_1 - WT) - (DKO_2 - WT)	no hit
Phldb2	Q8K1N2|Q8K1N2-2	Pleckstrin homology-like domain family B member 2 OS=Mus musculus GN=Phldb2 PE=1 SV=2|Isoform 2 of Pleckstrin homology-like domain family B member 2 OS=Mus musculus GN=Phldb2	3	2	-0.449141	0.0029745	0.0618448	DKO_1 - WT	no hit
Txndc5	E9PXX7|Q3TEE8|Q91W90	Thioredoxin domain-containing protein 5 OS=Mus musculus GN=Txndc5 PE=1 SV=1|Thioredoxin domain-containing protein 5 OS=Mus musculus GN=Txndc5 PE=1 SV=1|Thioredoxin domain-containing protein 5 OS=Mus musculus GN=Txndc5 PE=1 SV=2	3	2	-0.447901	0.001044	0.0454524	(DKO_1 - WT) - (DKO_2 - WT)	no hit
Aldh4a1	Q8CHT0	Delta-1-pyrroline-5-carboxylate dehydrogenase, mitochondrial OS=Mus musculus GN=Aldh4a1 PE=1 SV=3	3	2	-0.447746	0.00148143	0.0409716	DKO_1 - WT	no hit
Apoe	P08226|Q3TXU4	Apolipoprotein E OS=Mus musculus GN=Apoe PE=1 SV=2|Apolipoprotein E OS=Mus musculus GN=Apoe PE=1 SV=1	3	2	-0.447709	0.00279545	0.355571	DKO_2 - WT	no hit
Nme4	Q9WV84	Nucleoside diphosphate kinase, mitochondrial OS=Mus musculus GN=Nme4 PE=1 SV=1	3	2	-0.447636	0.00131198	0.0491334	(DKO_1 - WT) - (DKO_2 - WT)	no hit
Fgfr1	J3QN85|P16092|P16092-3|P16092-6	Fibroblast growth factor receptor OS=Mus musculus GN=Fgfr1 PE=1 SV=1|Fibroblast growth factor receptor 1 OS=Mus musculus GN=Fgfr1 PE=1 SV=2|Isoform 3 of Fibroblast growth factor receptor 1 OS=Mus musculus GN=Fgfr1|Isoform 6 of Fibroblast growth factor receptor 1 OS=Mus musculus GN=Fgfr1	3	2	-0.447243	0.00324296	0.0653003	DKO_1 - WT	no hit
Mdm1	B2RPU6|E9PW14|E9Q0B1|Q9D067|Q9D067-2|Q9D067-4	Mdm1 protein OS=Mus musculus GN=Mdm1 PE=1 SV=1|Nuclear protein MDM1 OS=Mus musculus GN=Mdm1 PE=1 SV=1|Nuclear protein MDM1 OS=Mus musculus GN=Mdm1 PE=1 SV=1|Nuclear protein MDM1 OS=Mus musculus GN=Mdm1 PE=1 SV=2|Isoform 2 of Nuclear protein MDM1 OS=Mus musculus GN=Mdm1|Isoform 4 of Nuclear protein MDM1 OS=Mus musculus GN=Mdm1	3	2	-0.447119	0.0130697	0.139786	DKO_1 - WT	no hit
Plec	Q9QXS1|Q9QXS1-14|Q9QXS1-2	Plectin OS=Mus musculus GN=Plec PE=1 SV=3|Isoform PLEC-1G of Plectin OS=Mus musculus GN=Plec|Isoform PLEC-1 of Plectin OS=Mus musculus GN=Plec	3	2	-0.446928	0.00208117	0.0610883	(DKO_1 - WT) - (DKO_2 - WT)	no hit
Ddr2	Q62371	Discoidin domain-containing receptor 2 OS=Mus musculus GN=Ddr2 PE=1 SV=2	3	2	-0.445307	0.00552821	0.0967423	(DKO_1 - WT) - (DKO_2 - WT)	no hit
P11260	P11260	LINE-1 retrotransposable element ORF1 protein OS=Mus musculus PE=1 SV=2	3	2	-0.444767	0.00488883	0.0821602	DKO_1 - WT	no hit
Mmp2	P33434|P33434-2	72 kDa type IV collagenase OS=Mus musculus GN=Mmp2 PE=1 SV=1|Isoform 2 of 72 kDa type IV collagenase OS=Mus musculus GN=Mmp2	3	2	-0.443583	0.00145369	0.0408065	DKO_1 - WT	no hit
Gas6	Q61592	Growth arrest-specific protein 6 OS=Mus musculus GN=Gas6 PE=2 SV=2	3	2	-0.443153	0.00210821	0.0505041	DKO_1 - WT	no hit
Gpx8	Q9D7B7	Probable glutathione peroxidase 8 OS=Mus musculus GN=Gpx8 PE=1 SV=1	3	2	-0.442896	0.00169386	0.0539221	(DKO_1 - WT) - (DKO_2 - WT)	no hit
Cntnap2	E9QNF7|Q9CPW0	Contactin-associated protein-like 2 OS=Mus musculus GN=Cntnap2 PE=1 SV=1|Contactin-associated protein-like 2 OS=Mus musculus GN=Cntnap2 PE=1 SV=2	3	2	-0.442669	0.00143003	0.0509703	(DKO_1 - WT) - (DKO_2 - WT)	no hit
Vwa5a	Q99KC8	von Willebrand factor A domain-containing protein 5A OS=Mus musculus GN=Vwa5a PE=1 SV=2	3	2	-0.442576	0.00125976	0.0371457	DKO_1 - WT	no hit
Slc9a3r2	A0A0R4IZX2|Q9JHL1	Na(+)/H(+) exchange regulatory cofactor NHE-RF OS=Mus musculus GN=Slc9a3r2 PE=1 SV=1|Na(+)/H(+) exchange regulatory cofactor NHE-RF2 OS=Mus musculus GN=Slc9a3r2 PE=1 SV=2	3	2	-0.441414	0.00250454	0.0554527	DKO_1 - WT	no hit
Ephb4	P54761|Q8C8K1	Ephrin type-B receptor 4 OS=Mus musculus GN=Ephb4 PE=1 SV=2|Ephrin type-B receptor 4 OS=Mus musculus GN=Ephb4 PE=1 SV=1	3	2	-0.44117	0.00129806	0.0491334	(DKO_1 - WT) - (DKO_2 - WT)	no hit
Il17rd	Q8JZL1	Interleukin-17 receptor D OS=Mus musculus GN=Il17rd PE=1 SV=1	3	2	-0.441084	0.00456648	0.0882071	(DKO_1 - WT) - (DKO_2 - WT)	no hit
Dgkd	E9PUQ8	Diacylglycerol kinase OS=Mus musculus GN=Dgkd PE=1 SV=1	3	2	-0.440839	0.00306358	0.0726028	(DKO_1 - WT) - (DKO_2 - WT)	no hit
P3h4	Q8K2B0	Synaptonemal complex protein SC65 OS=Mus musculus GN=P3h4 PE=2 SV=1	3	2	-0.440693	0.00591907	0.0999923	(DKO_1 - WT) - (DKO_2 - WT)	no hit
Thbs2	Q03350	Thrombospondin-2 OS=Mus musculus GN=Thbs2 PE=1 SV=2	3	2	-0.440368	0.00460244	0.0794044	DKO_1 - WT	no hit
Zyg11b	Q3UFS0	Protein zyg-11 homolog B OS=Mus musculus GN=Zyg11b PE=1 SV=2	3	2	-0.440253	0.0181881	0.171243	(DKO_1 - WT) - (DKO_2 - WT)	no hit
Zdhhc5	Q8VDZ4|Q8VDZ4-2	Palmitoyltransferase ZDHHC5 OS=Mus musculus GN=Zdhhc5 PE=1 SV=1|Isoform 2 of Palmitoyltransferase ZDHHC5 OS=Mus musculus GN=Zdhhc5	3	2	-0.439093	0.00459825	0.0794044	DKO_1 - WT	no hit
Cdyl	Q9WTK2|Q9WTK2-2	Chromodomain Y-like protein OS=Mus musculus GN=Cdyl PE=1 SV=1|Isoform 2 of Chromodomain Y-like protein OS=Mus musculus GN=Cdyl	3	2	-0.439034	0.00254112	0.0672827	(DKO_1 - WT) - (DKO_2 - WT)	no hit
Slc25a16	D3YVC9|Q8C0K5	Graves disease carrier protein homolog (Fragment) OS=Mus musculus GN=Slc25a16 PE=1 SV=1|Graves disease carrier protein homolog OS=Mus musculus GN=Slc25a16 PE=1 SV=1	3	2	-0.438624	0.00348701	0.0774665	(DKO_1 - WT) - (DKO_2 - WT)	no hit
Rnf130	Q5SVR5|Q8VEM1	E3 ubiquitin-protein ligase RNF130 OS=Mus musculus GN=Rnf130 PE=1 SV=1|E3 ubiquitin-protein ligase RNF130 OS=Mus musculus GN=Rnf130 PE=2 SV=1	3	2	-0.437526	0.0110993	0.129174	DKO_1 - WT	no hit
Fras1	Q80T14	Extracellular matrix protein FRAS1 OS=Mus musculus GN=Fras1 PE=1 SV=2	3	2	-0.437487	0.0013775	0.039365	DKO_1 - WT	no hit
Magi2	A0A0G2JE00|Q9WVQ1|Q9WVQ1-2	Membrane-associated guanylate kinase, WW and PDZ domain-containing protein 2 OS=Mus musculus GN=Magi2 PE=1 SV=1|Membrane-associated guanylate kinase, WW and PDZ domain-containing protein 2 OS=Mus musculus GN=Magi2 PE=1 SV=2|Isoform 2 of Membrane-associated guanylate kinase, WW and PDZ domain-containing protein 2 OS=Mus musculus GN=Magi2	3	2	-0.437422	0.0105376	0.126027	DKO_1 - WT	no hit
Tpm1	E9Q452|P58771|P58771-2|Q8BP43|Q8BSH3	Tropomyosin alpha-1 chain OS=Mus musculus GN=Tpm1 PE=1 SV=1|Tropomyosin alpha-1 chain OS=Mus musculus GN=Tpm1 PE=1 SV=1|Isoform 2 of Tropomyosin alpha-1 chain OS=Mus musculus GN=Tpm1|Tropomyosin 1, alpha, isoform CRA_c OS=Mus musculus GN=Tpm1 PE=1 SV=1|Tropomyosin alpha-1 chain OS=Mus musculus GN=Tpm1 PE=1 SV=1	3	2	-0.437292	0.00444759	0.0786145	DKO_1 - WT	no hit
Usp40	Q8BWR4|Q8BWR4-2|Q8BWR4-3	Ubiquitin carboxyl-terminal hydrolase 40 OS=Mus musculus GN=Usp40 PE=1 SV=2|Isoform 2 of Ubiquitin carboxyl-terminal hydrolase 40 OS=Mus musculus GN=Usp40|Isoform 3 of Ubiquitin carboxyl-terminal hydrolase 40 OS=Mus musculus GN=Usp40	3	2	-0.437128	0.0130038	0.139431	DKO_1 - WT	no hit
Dse	Q8BLI4	Dermatan-sulfate epimerase OS=Mus musculus GN=Dse PE=2 SV=1	3	2	-0.436325	0.00167908	0.044458	DKO_1 - WT	no hit
Pbx2	Q4FJL3|V9GXB8	Pbx2 protein OS=Mus musculus GN=Pbx2 PE=1 SV=1|Pre B-cell leukemia transcription factor 2, isoform CRA_d OS=Mus musculus GN=Pbx2 PE=1 SV=1	3	2	-0.436162	0.0314109	0.22998	(DKO_1 - WT) - (DKO_2 - WT)	no hit
Prorsd1	Q9D820	Prolyl-tRNA synthetase associated domain-containing protein 1 OS=Mus musculus GN=Prorsd1 PE=1 SV=1	3	2	-0.435184	0.00128242	0.0374731	DKO_1 - WT	no hit
Sema4b	Q62179	Semaphorin-4B OS=Mus musculus GN=Sema4b PE=1 SV=2	3	2	-0.434804	0.0033663	0.0765875	(DKO_1 - WT) - (DKO_2 - WT)	no hit
Atl3	E9PYT3|Q91YH5	Atlastin-3 OS=Mus musculus GN=Atl3 PE=1 SV=1|Atlastin-3 OS=Mus musculus GN=Atl3 PE=1 SV=1	3	2	-0.43392	0.00270331	0.057909	DKO_1 - WT	no hit
Dcn	P28654|Q3UKR1	Decorin OS=Mus musculus GN=Dcn PE=1 SV=1|Decorin OS=Mus musculus GN=Dcn PE=1 SV=1	3	2	-0.433847	0.0024163	0.0655837	(DKO_1 - WT) - (DKO_2 - WT)	no hit
Atg4b	A0A0R4J065	Cysteine protease ATG4B OS=Mus musculus GN=Atg4b PE=1 SV=1	3	2	-0.433713	0.00132472	0.0491334	(DKO_1 - WT) - (DKO_2 - WT)	no hit
Aldh4a1	Q8CHT0	Delta-1-pyrroline-5-carboxylate dehydrogenase, mitochondrial OS=Mus musculus GN=Aldh4a1 PE=1 SV=3	3	2	-0.433713	0.00184204	0.0570367	(DKO_1 - WT) - (DKO_2 - WT)	no hit
Lxn	P70202|Q14BZ3	Latexin OS=Mus musculus GN=Lxn PE=1 SV=2|Latexin OS=Mus musculus GN=Lxn PE=1 SV=1	3	2	-0.433474	0.0022358	0.051889	DKO_1 - WT	no hit
Nrk	B1B0C9|Q9R0G8	Nik-related protein kinase OS=Mus musculus GN=Nrk PE=1 SV=1|Nik-related protein kinase OS=Mus musculus GN=Nrk PE=1 SV=2	3	2	-0.433362	0.00122782	0.252419	DKO_2 - WT	no hit
Fam206a	Q80ZQ9	Protein Simiate OS=Mus musculus GN=Fam206a PE=1 SV=2	3	2	-0.432415	0.00955726	0.126119	(DKO_1 - WT) - (DKO_2 - WT)	no hit
Klf12	O35738	Krueppel-like factor 12 OS=Mus musculus GN=Klf12 PE=1 SV=2	3	2	-0.432395	0.00712569	0.10902	(DKO_1 - WT) - (DKO_2 - WT)	no hit
Ric8a	Q3TIR3	Synembryn-A OS=Mus musculus GN=Ric8a PE=1 SV=2	3	2	-0.432283	0.00215064	0.0622821	(DKO_1 - WT) - (DKO_2 - WT)	no hit
Pnmal2	G3X9N3	MCG16539 OS=Mus musculus GN=Pnmal2 PE=1 SV=1	3	2	-0.431872	0.00858895	0.119627	(DKO_1 - WT) - (DKO_2 - WT)	no hit
Fundc2	Q9D6K8	FUN14 domain-containing protein 2 OS=Mus musculus GN=Fundc2 PE=1 SV=1	3	2	-0.431654	0.00477196	0.0809476	DKO_1 - WT	no hit
Mrps17	Q9CQE3	28S ribosomal protein S17, mitochondrial OS=Mus musculus GN=Mrps17 PE=1 SV=1	3	2	-0.43129	0.0036605	0.0709775	DKO_1 - WT	no hit
Thy1	P01831	Thy-1 membrane glycoprotein OS=Mus musculus GN=Thy1 PE=1 SV=1	3	2	-0.431256	0.00159553	0.285231	DKO_2 - WT	no hit
Acvr1b	Q3TZF1|Q61271	Receptor protein serine/threonine kinase OS=Mus musculus GN=Acvr1b PE=1 SV=1|Activin receptor type-1B OS=Mus musculus GN=Acvr1b PE=1 SV=1	3	2	-0.430477	0.00725841	0.110346	(DKO_1 - WT) - (DKO_2 - WT)	no hit
Lox	P28301|Q3TXH3	Protein-lysine 6-oxidase OS=Mus musculus GN=Lox PE=1 SV=1|Lysyl oxidase OS=Mus musculus GN=Lox PE=1 SV=1	3	2	-0.430264	0.00279879	0.0589276	DKO_1 - WT	no hit
P3h1	A6PW84|Q3V1T4	Prolyl 3-hydroxylase 1 OS=Mus musculus GN=P3h1 PE=1 SV=1|Prolyl 3-hydroxylase 1 OS=Mus musculus GN=P3h1 PE=1 SV=2	3	2	-0.430176	0.00129508	0.0376736	DKO_1 - WT	no hit
Clcc1	A2AEM2|Q99LI2	Chloride channel CLIC-like 1, isoform CRA_a OS=Mus musculus GN=Clcc1 PE=1 SV=1|Chloride channel CLIC-like protein 1 OS=Mus musculus GN=Clcc1 PE=1 SV=1	3	2	-0.430063	0.0124404	0.135404	DKO_1 - WT	no hit
Phldb2	Q8K1N2|Q8K1N2-2	Pleckstrin homology-like domain family B member 2 OS=Mus musculus GN=Phldb2 PE=1 SV=2|Isoform 2 of Pleckstrin homology-like domain family B member 2 OS=Mus musculus GN=Phldb2	3	2	-0.430042	0.0039164	0.0817803	(DKO_1 - WT) - (DKO_2 - WT)	no hit
Sgce	D3Z572|E9PX46|F6R6P2|F6WKE4|F8WGM3|O70258|O70258-2	Epsilon-sarcoglycan OS=Mus musculus GN=Sgce PE=1 SV=1|Epsilon-sarcoglycan OS=Mus musculus GN=Sgce PE=1 SV=2|Epsilon-sarcoglycan OS=Mus musculus GN=Sgce PE=1 SV=2|Epsilon-sarcoglycan OS=Mus musculus GN=Sgce PE=1 SV=2|Epsilon-sarcoglycan OS=Mus musculus GN=Sgce PE=1 SV=2|Epsilon-sarcoglycan OS=Mus musculus GN=Sgce PE=1 SV=2|Isoform 2 of Epsilon-sarcoglycan OS=Mus musculus GN=Sgce	3	2	-0.429934	0.00280694	0.0589276	DKO_1 - WT	no hit
Nfix	Q3TYK3	Nuclear factor 1 OS=Mus musculus GN=Nfix PE=1 SV=1	3	2	-0.429779	0.00158997	0.0427989	DKO_1 - WT	no hit
Sgms1	Q8VCQ6	Phosphatidylcholine:ceramide cholinephosphotransferase 1 OS=Mus musculus GN=Sgms1 PE=1 SV=2	3	2	-0.429681	0.00522053	0.511254	DKO_2 - WT	no hit
Actn1	A1BN54|Q7TPR4	Alpha actinin 1a OS=Mus musculus GN=Actn1 PE=1 SV=1|Alpha-actinin-1 OS=Mus musculus GN=Actn1 PE=1 SV=1	3	2	-0.429558	0.00148915	0.0409716	DKO_1 - WT	no hit
Stx4	P70452	Syntaxin-4 OS=Mus musculus GN=Stx4 PE=1 SV=1	3	2	-0.429435	0.00372259	0.0709775	DKO_1 - WT	no hit
Rcbtb1	A0A0R4J025	RCC1 and BTB domain-containing protein 1 OS=Mus musculus GN=Rcbtb1 PE=1 SV=1	3	2	-0.428922	0.00221571	0.0517026	DKO_1 - WT	no hit
Cntnap2	E9QNF7|Q9CPW0	Contactin-associated protein-like 2 OS=Mus musculus GN=Cntnap2 PE=1 SV=1|Contactin-associated protein-like 2 OS=Mus musculus GN=Cntnap2 PE=1 SV=2	3	2	-0.42835	0.00179199	0.0461294	DKO_1 - WT	no hit
Rcn3	Q8BH97	Reticulocalbin-3 OS=Mus musculus GN=Rcn3 PE=1 SV=1	3	2	-0.428033	0.00398698	0.082896	(DKO_1 - WT) - (DKO_2 - WT)	no hit
Cd109	A6MDD3|Q8R422	CD109 antigen OS=Mus musculus GN=Cd109 PE=1 SV=1|CD109 antigen OS=Mus musculus GN=Cd109 PE=1 SV=1	3	2	-0.428032	0.00510708	0.0844667	DKO_1 - WT	no hit
Map3k7	Q543B5|Q62073|Q923A8	Mitogen activated protein kinase kinase kinase 7, isoform CRA_a OS=Mus musculus GN=Map3k7 PE=1 SV=1|Mitogen-activated protein kinase kinase kinase 7 OS=Mus musculus GN=Map3k7 PE=1 SV=1|Map3k7 protein OS=Mus musculus GN=Map3k7 PE=1 SV=1	3	2	-0.428029	0.00375047	0.0800305	(DKO_1 - WT) - (DKO_2 - WT)	no hit
Ccbl1|Kyat1	A2AQY8|A2AQY9|Q05CI8|Q8BTY1	Kynurenine--oxoglutarate transaminase 1 OS=Mus musculus GN=Ccbl1 PE=1 SV=1|Kynurenine--oxoglutarate transaminase 1 OS=Mus musculus GN=Ccbl1 PE=1 SV=1|Ccbl1 protein OS=Mus musculus GN=Ccbl1 PE=1 SV=1|Kynurenine--oxoglutarate transaminase 1 OS=Mus musculus GN=Kyat1 PE=1 SV=1	3	2	-0.427731	0.0018713	0.0474185	DKO_1 - WT	no hit
Cgnl1	B2RSU6|D3Z3H4|Q6AW69|Q6AW69-3|Q6AW69-4|Q6AW69-5	Cingulin-like 1 OS=Mus musculus GN=Cgnl1 PE=1 SV=1|Cingulin-like protein 1 OS=Mus musculus GN=Cgnl1 PE=1 SV=1|Cingulin-like protein 1 OS=Mus musculus GN=Cgnl1 PE=1 SV=2|Isoform 3 of Cingulin-like protein 1 OS=Mus musculus GN=Cgnl1|Isoform 4 of Cingulin-like protein 1 OS=Mus musculus GN=Cgnl1|Isoform 5 of Cingulin-like protein 1 OS=Mus musculus GN=Cgnl1	3	2	-0.427436	0.00212417	0.0620697	(DKO_1 - WT) - (DKO_2 - WT)	no hit
Ralb	Q9JIW9	Ras-related protein Ral-B OS=Mus musculus GN=Ralb PE=1 SV=1	3	2	-0.427218	0.00145574	0.0408065	DKO_1 - WT	no hit
Igdcc4	Q9EQS9|Q9EQS9-2	Immunoglobulin superfamily DCC subclass member 4 OS=Mus musculus GN=Igdcc4 PE=2 SV=1|Isoform 2 of Immunoglobulin superfamily DCC subclass member 4 OS=Mus musculus GN=Igdcc4	3	2	-0.427148	0.00256833	0.0674526	(DKO_1 - WT) - (DKO_2 - WT)	no hit
Man2a1	P27046	Alpha-mannosidase 2 OS=Mus musculus GN=Man2a1 PE=1 SV=2	3	2	-0.427062	0.00343373	0.0771349	(DKO_1 - WT) - (DKO_2 - WT)	no hit
Loxl2	P58022|P58022-2	Lysyl oxidase homolog 2 OS=Mus musculus GN=Loxl2 PE=1 SV=2|Isoform 2 of Lysyl oxidase homolog 2 OS=Mus musculus GN=Loxl2	3	2	-0.426584	0.00137444	0.039365	DKO_1 - WT	no hit
Nfic	P70255|P70255-2|P70255-3|P70255-4|P70255-5	Nuclear factor 1 C-type OS=Mus musculus GN=Nfic PE=1 SV=1|Isoform 2 of Nuclear factor 1 C-type OS=Mus musculus GN=Nfic|Isoform 3 of Nuclear factor 1 C-type OS=Mus musculus GN=Nfic|Isoform 4 of Nuclear factor 1 C-type OS=Mus musculus GN=Nfic|Isoform 5 of Nuclear factor 1 C-type OS=Mus musculus GN=Nfic	3	2	-0.426521	0.00166567	0.285231	DKO_2 - WT	no hit
Oaf	Q8QZR4	Out at first protein homolog OS=Mus musculus GN=Oaf PE=2 SV=1	3	2	-0.42616	0.00228091	0.0520995	DKO_1 - WT	no hit
Fgfr2	D3Z5M8|E9PVU6|E9PX60|E9PX67|E9PX88|E9PX90|E9PXV8|E9Q5C2|E9Q5C3|E9Q700|E9Q708|E9Q7C7|E9Q7E6|E9Q7E8|E9Q7T0|E9QK53|P21803|P21803-2	Fibroblast growth factor receptor 2 (Fragment) OS=Mus musculus GN=Fgfr2 PE=1 SV=1|Fibroblast growth factor receptor 2 (Fragment) OS=Mus musculus GN=Fgfr2 PE=1 SV=1|Fibroblast growth factor receptor 2 (Fragment) OS=Mus musculus GN=Fgfr2 PE=1 SV=1|Fibroblast growth factor receptor 2 (Fragment) OS=Mus musculus GN=Fgfr2 PE=1 SV=1|Fibroblast growth factor receptor 2 (Fragment) OS=Mus musculus GN=Fgfr2…	3	2	-0.426144	0.0019543	0.0483291	DKO_1 - WT	no hit
Col1a1	P11087	Collagen alpha-1(I) chain OS=Mus musculus GN=Col1a1 PE=1 SV=4	3	2	-0.425879	0.0622245	0.965486	DKO_2 - WT	no hit
Vim	P20152|Q5FWJ3	Vimentin OS=Mus musculus GN=Vim PE=1 SV=3|Vimentin OS=Mus musculus GN=Vim PE=1 SV=1	3	2	-0.42525	0.00271146	0.057909	DKO_1 - WT	no hit
Srek1ip1	Q4V9W2	Protein SREK1IP1 OS=Mus musculus GN=Srek1ip1 PE=1 SV=1	3	2	-0.425158	0.00877089	0.115409	DKO_1 - WT	no hit
Taf15	Q8BQ46	Protein Taf15 OS=Mus musculus GN=Taf15 PE=1 SV=1	3	2	-0.425104	0.0161949	0.801955	DKO_2 - WT	no hit
Fbxo3	Q9DC63	F-box only protein 3 OS=Mus musculus GN=Fbxo3 PE=1 SV=1	3	2	-0.424553	0.00185521	0.0570367	(DKO_1 - WT) - (DKO_2 - WT)	no hit
Ctnna1	P26231|Q545R0	Catenin alpha-1 OS=Mus musculus GN=Ctnna1 PE=1 SV=1|Catenin (Cadherin associated protein), alpha 1 OS=Mus musculus GN=Ctnna1 PE=1 SV=1	3	2	-0.423901	0.00219965	0.0517026	DKO_1 - WT	no hit
Gltscr2	Q8BK35	MCG2065, isoform CRA_c OS=Mus musculus GN=Gltscr2 PE=1 SV=1	3	2	-0.423304	0.0030769	0.366853	DKO_2 - WT	no hit
Acvr1b	Q3TZF1|Q61271	Receptor protein serine/threonine kinase OS=Mus musculus GN=Acvr1b PE=1 SV=1|Activin receptor type-1B OS=Mus musculus GN=Acvr1b PE=1 SV=1	3	2	-0.423169	0.00800071	0.108126	DKO_1 - WT	no hit
Fat1	F2Z4A3	Protein Fat1 OS=Mus musculus GN=Fat1 PE=1 SV=1	3	2	-0.422615	0.00455917	0.0792905	DKO_1 - WT	no hit
Zfp329|Znf329	B2RSV9|Q6GQR8	Zinc finger protein 329 OS=Mus musculus GN=Zfp329 PE=1 SV=1|Zinc finger protein 329 OS=Mus musculus GN=Znf329 PE=1 SV=2	3	2	-0.422366	0.117163	0.409594	DKO_1 - WT	no hit
Utrn	E9Q6R7	Protein Utrn OS=Mus musculus GN=Utrn PE=1 SV=1	3	2	-0.421671	0.00258265	0.0567751	DKO_1 - WT	no hit
Palld	Q9ET54|Q9ET54-4|Q9ET54-6	Palladin OS=Mus musculus GN=Palld PE=1 SV=2|Isoform 4 of Palladin OS=Mus musculus GN=Palld|Isoform 6 of Palladin OS=Mus musculus GN=Palld	3	2	-0.421619	0.00156811	0.0524789	(DKO_1 - WT) - (DKO_2 - WT)	no hit
Ntmt1	Q8R2U4	N-terminal Xaa-Pro-Lys N-methyltransferase 1 OS=Mus musculus GN=Ntmt1 PE=1 SV=3	3	2	-0.421364	0.0116856	0.138153	(DKO_1 - WT) - (DKO_2 - WT)	no hit
Gabarapl2	P60521	Gamma-aminobutyric acid receptor-associated protein-like 2 OS=Mus musculus GN=Gabarapl2 PE=1 SV=1	3	2	-0.420662	0.00221356	0.0517026	DKO_1 - WT	no hit
Chsy1	Q6ZQ11	Chondroitin sulfate synthase 1 OS=Mus musculus GN=Chsy1 PE=2 SV=2	3	2	-0.420262	0.00450918	0.0882071	(DKO_1 - WT) - (DKO_2 - WT)	no hit
Pdgfc	Q8CI19	Platelet-derived growth factor C OS=Mus musculus GN=Pdgfc PE=1 SV=2	3	2	-0.419915	0.00209141	0.0505041	DKO_1 - WT	no hit
Pla2g7	Q60963	Platelet-activating factor acetylhydrolase OS=Mus musculus GN=Pla2g7 PE=2 SV=2	3	2	-0.419828	0.00228921	0.0641032	(DKO_1 - WT) - (DKO_2 - WT)	no hit
Zfyve9	A0S860|A2A8R0|A8Y5G5	Protein Zfyve9 OS=Mus musculus GN=Zfyve9 PE=1 SV=1|MCG17975 OS=Mus musculus GN=Zfyve9 PE=1 SV=1|Protein Zfyve9 OS=Mus musculus GN=Zfyve9 PE=1 SV=1	3	2	-0.418903	0.00429218	0.0774683	DKO_1 - WT	no hit
Stom	P54116	Erythrocyte band 7 integral membrane protein OS=Mus musculus GN=Stom PE=1 SV=3	3	2	-0.418867	0.00245607	0.0551299	DKO_1 - WT	no hit
Zfp362	B1ASA5	Protein Zfp362 OS=Mus musculus GN=Zfp362 PE=1 SV=1	3	2	-0.41847	0.00403839	0.083602	(DKO_1 - WT) - (DKO_2 - WT)	no hit
Htra1	Q9R118	Serine protease HTRA1 OS=Mus musculus GN=Htra1 PE=1 SV=2	3	2	-0.418214	0.00291593	0.0706779	(DKO_1 - WT) - (DKO_2 - WT)	no hit
Serpine2	Q07235|Q543R5	Glia-derived nexin OS=Mus musculus GN=Serpine2 PE=1 SV=2|Glia-derived nexin OS=Mus musculus GN=Serpine2 PE=1 SV=1	3	2	-0.418144	0.00375295	0.0709775	DKO_1 - WT	no hit
Npr3	P70180	Atrial natriuretic peptide receptor 3 OS=Mus musculus GN=Npr3 PE=1 SV=3	3	2	-0.415853	0.00237726	0.321277	DKO_2 - WT	no hit
Map3k7	Q543B5|Q62073|Q923A8	Mitogen activated protein kinase kinase kinase 7, isoform CRA_a OS=Mus musculus GN=Map3k7 PE=1 SV=1|Mitogen-activated protein kinase kinase kinase 7 OS=Mus musculus GN=Map3k7 PE=1 SV=1|Map3k7 protein OS=Mus musculus GN=Map3k7 PE=1 SV=1	3	2	-0.415721	0.00449297	0.0792007	DKO_1 - WT	no hit
Sfrp1	Q8C4U3	Secreted frizzled-related protein 1 OS=Mus musculus GN=Sfrp1 PE=1 SV=3	3	2	-0.415213	0.00211023	0.0505041	DKO_1 - WT	no hit
Mcfd2	D0EW11|Q8K5B2	Multiple coagulation factor deficiency 2 isoform 1 OS=Mus musculus GN=Mcfd2 PE=1 SV=1|Multiple coagulation factor deficiency protein 2 homolog OS=Mus musculus GN=Mcfd2 PE=1 SV=1	3	2	-0.415103	0.0145658	0.148801	DKO_1 - WT	no hit
Hspa12b	Q9CZJ2	Heat shock 70 kDa protein 12B OS=Mus musculus GN=Hspa12b PE=1 SV=1	3	2	-0.414745	0.010586	0.130803	(DKO_1 - WT) - (DKO_2 - WT)	no hit
Palm3	A2TJV2	Paralemmin-3 OS=Mus musculus GN=Palm3 PE=1 SV=1	3	2	-0.41424	0.00732368	0.102833	DKO_1 - WT	no hit
Colec12	Q8K4Q8	Collectin-12 OS=Mus musculus GN=Colec12 PE=1 SV=1	3	2	-0.414168	0.0040066	0.0732136	DKO_1 - WT	no hit
Pdgfra	P26618	Platelet-derived growth factor receptor alpha OS=Mus musculus GN=Pdgfra PE=1 SV=3	3	2	-0.414001	0.0049314	0.511254	DKO_2 - WT	no hit
Cog8	Q9JJA2	Conserved oligomeric Golgi complex subunit 8 OS=Mus musculus GN=Cog8 PE=1 SV=3	3	2	-0.413793	0.00317424	0.0736541	(DKO_1 - WT) - (DKO_2 - WT)	no hit
Fam98a	Q3TJZ6	Protein FAM98A OS=Mus musculus GN=Fam98a PE=1 SV=1	3	2	-0.413102	0.00409151	0.0841645	(DKO_1 - WT) - (DKO_2 - WT)	no hit
Mtrf1l	Q8BJU9	Peptide chain release factor 1-like, mitochondrial OS=Mus musculus GN=Mtrf1l PE=2 SV=1	3	2	-0.412962	0.00293215	0.0706779	(DKO_1 - WT) - (DKO_2 - WT)	no hit
Ncaph2	E9PY48|Q8BSP2|Q8BSP2-2|Q8BSP2-3	Condensin-2 complex subunit H2 OS=Mus musculus GN=Ncaph2 PE=1 SV=1|Condensin-2 complex subunit H2 OS=Mus musculus GN=Ncaph2 PE=1 SV=1|Isoform 2 of Condensin-2 complex subunit H2 OS=Mus musculus GN=Ncaph2|Isoform 3 of Condensin-2 complex subunit H2 OS=Mus musculus GN=Ncaph2	3	2	-0.41284	0.00570264	0.0899083	DKO_1 - WT	no hit
Hoxc6	P10629	Homeobox protein Hox-C6 OS=Mus musculus GN=Hoxc6 PE=2 SV=2	3	2	-0.412425	0.00187601	0.0571346	(DKO_1 - WT) - (DKO_2 - WT)	no hit
Ncaph2	E9PY48|Q8BSP2|Q8BSP2-2|Q8BSP2-3	Condensin-2 complex subunit H2 OS=Mus musculus GN=Ncaph2 PE=1 SV=1|Condensin-2 complex subunit H2 OS=Mus musculus GN=Ncaph2 PE=1 SV=1|Isoform 2 of Condensin-2 complex subunit H2 OS=Mus musculus GN=Ncaph2|Isoform 3 of Condensin-2 complex subunit H2 OS=Mus musculus GN=Ncaph2	3	2	-0.412163	0.00575836	0.0993765	(DKO_1 - WT) - (DKO_2 - WT)	no hit
Epha10	F6WVB0|Q8BYG9	Ephrin type-A receptor 10 (Fragment) OS=Mus musculus GN=Epha10 PE=1 SV=1|Ephrin type-A receptor 10 OS=Mus musculus GN=Epha10 PE=2 SV=2	3	2	-0.412138	0.0049053	0.511254	DKO_2 - WT	no hit
Kifap3	P70188|P70188-2	Kinesin-associated protein 3 OS=Mus musculus GN=Kifap3 PE=1 SV=1|Isoform KAP3B of Kinesin-associated protein 3 OS=Mus musculus GN=Kifap3	3	2	-0.411846	0.00279935	0.0695761	(DKO_1 - WT) - (DKO_2 - WT)	no hit
Nfix	Q3TYK3	Nuclear factor 1 OS=Mus musculus GN=Nfix PE=1 SV=1	3	2	-0.411689	0.00212727	0.30714	DKO_2 - WT	no hit
Col5a1	B1AWB9|O88207	Collagen alpha-1(V) chain OS=Mus musculus GN=Col5a1 PE=1 SV=1|Collagen alpha-1(V) chain OS=Mus musculus GN=Col5a1 PE=1 SV=2	3	2	-0.411662	0.00979982	0.128092	(DKO_1 - WT) - (DKO_2 - WT)	no hit
Ifnar1	P33896	Interferon alpha/beta receptor 1 OS=Mus musculus GN=Ifnar1 PE=1 SV=2	3	2	-0.41084	0.00654837	0.0980382	DKO_1 - WT	no hit
Trim67	Q505D9	Tripartite motif-containing protein 67 OS=Mus musculus GN=Trim67 PE=2 SV=1	3	2	-0.410227	0.0593022	0.306773	(DKO_1 - WT) - (DKO_2 - WT)	no hit
Wdr74	Q8VCG3	WD repeat-containing protein 74 OS=Mus musculus GN=Wdr74 PE=2 SV=1	3	2	-0.410165	0.0059037	0.0914016	DKO_1 - WT	no hit
Cd44	A2APM1|A2APM2|A2APM3|A2APM4|A2APM5|E9QKM8|P15379|P15379-10|P15379-11|P15379-2|P15379-3|P15379-4|P15379-5|P15379-6|P15379-7|P15379-8|P15379-9|Q3U8S1|Q80X37	CD44 antigen OS=Mus musculus GN=Cd44 PE=1 SV=1|CD44 antigen OS=Mus musculus GN=Cd44 PE=1 SV=1|CD44 antigen OS=Mus musculus GN=Cd44 PE=1 SV=1|CD44 antigen OS=Mus musculus GN=Cd44 PE=1 SV=1|CD44 antigen OS=Mus musculus GN=Cd44 PE=1 SV=1|CD44 antigen OS=Mus musculus GN=Cd44 PE=1 SV=1|CD44 antigen OS=Mus musculus GN=Cd44 PE=1 SV=3|Isoform 8 of CD44 antigen OS=Mus musculus GN=Cd44|Isoform 9 of CD44 an…	3	2	-0.409087	0.00361689	0.0792662	(DKO_1 - WT) - (DKO_2 - WT)	no hit
Ly6h	Q544M1|Q8K356|Q9WUC3	Lymphocyte antigen 6 complex, locus H, isoform CRA_a OS=Mus musculus GN=Ly6h PE=1 SV=1|Lymphocyte antigen 6 complex, locus H OS=Mus musculus GN=Ly6h PE=1 SV=1|Lymphocyte antigen 6H OS=Mus musculus GN=Ly6h PE=1 SV=2	3	2	-0.408717	0.0276589	0.214211	(DKO_1 - WT) - (DKO_2 - WT)	no hit
Hoxb9	P20615	Homeobox protein Hox-B9 OS=Mus musculus GN=Hoxb9 PE=2 SV=3	3	2	-0.408126	0.00330611	0.0757836	(DKO_1 - WT) - (DKO_2 - WT)	no hit
Utf1	Q6J1H4	Undifferentiated embryonic cell transcription factor 1 OS=Mus musculus GN=Utf1 PE=1 SV=2	3	2	-0.407848	0.00529529	0.511254	DKO_2 - WT	no hit
Sdc1	P18828|P18828-2	Syndecan-1 OS=Mus musculus GN=Sdc1 PE=1 SV=1|Isoform 2 of Syndecan-1 OS=Mus musculus GN=Sdc1	3	2	-0.407801	0.0019787	0.0486206	DKO_1 - WT	no hit
Agfg2	Q3TBU7|Q3U2K8|Q80WC7|Q80WC7-2	Arf-GAP domain and FG repeat-containing protein 2 (Fragment) OS=Mus musculus GN=Agfg2 PE=1 SV=1|Arf-GAP domain and FG repeat-containing protein 2 OS=Mus musculus GN=Agfg2 PE=1 SV=1|Arf-GAP domain and FG repeat-containing protein 2 OS=Mus musculus GN=Agfg2 PE=1 SV=1|Isoform 2 of Arf-GAP domain and FG repeat-containing protein 2 OS=Mus musculus GN=Agfg2	3	2	-0.407792	0.00417151	0.0760128	DKO_1 - WT	no hit
Mcc	E9PWI3|G3UW40	Protein Mcc OS=Mus musculus GN=Mcc PE=1 SV=1|MCG4620, isoform CRA_b OS=Mus musculus GN=Mcc PE=1 SV=1	3	2	-0.40751	0.00220839	0.0517026	DKO_1 - WT	no hit
Ptk7	Q8BKG3	Inactive tyrosine-protein kinase 7 OS=Mus musculus GN=Ptk7 PE=1 SV=1	3	2	-0.407453	0.00381098	0.0807902	(DKO_1 - WT) - (DKO_2 - WT)	no hit
Tpm1	E9Q452|P58771|P58771-2|Q8BP43|Q8BSH3	Tropomyosin alpha-1 chain OS=Mus musculus GN=Tpm1 PE=1 SV=1|Tropomyosin alpha-1 chain OS=Mus musculus GN=Tpm1 PE=1 SV=1|Isoform 2 of Tropomyosin alpha-1 chain OS=Mus musculus GN=Tpm1|Tropomyosin 1, alpha, isoform CRA_c OS=Mus musculus GN=Tpm1 PE=1 SV=1|Tropomyosin alpha-1 chain OS=Mus musculus GN=Tpm1 PE=1 SV=1	3	2	-0.407423	0.0067795	0.106608	(DKO_1 - WT) - (DKO_2 - WT)	no hit
Erbb2	P70424	Receptor tyrosine-protein kinase erbB-2 OS=Mus musculus GN=Erbb2 PE=1 SV=3	3	2	-0.406795	0.00575038	0.0903214	DKO_1 - WT	no hit
Stra6	A0A0R4J115	Stimulated by retinoic acid gene 6 protein OS=Mus musculus GN=Stra6 PE=1 SV=1	3	2	-0.40605	0.00451981	0.0792396	DKO_1 - WT	no hit
Rab4a	P56371	Ras-related protein Rab-4A OS=Mus musculus GN=Rab4a PE=1 SV=2	3	2	-0.405999	0.00442754	0.0881852	(DKO_1 - WT) - (DKO_2 - WT)	no hit
Fam98a	Q3TJZ6	Protein FAM98A OS=Mus musculus GN=Fam98a PE=1 SV=1	3	2	-0.405928	0.00455706	0.0792905	DKO_1 - WT	no hit
Slc4a4	A7E1Z5|O88343|O88343-2	Anion exchange protein OS=Mus musculus GN=Slc4a4 PE=1 SV=1|Electrogenic sodium bicarbonate cotransporter 1 OS=Mus musculus GN=Slc4a4 PE=1 SV=2|Isoform 2 of Electrogenic sodium bicarbonate cotransporter 1 OS=Mus musculus GN=Slc4a4	3	2	-0.405633	0.00212542	0.0505041	DKO_1 - WT	no hit
Katnb1	Q8BG40	Katanin p80 WD40 repeat-containing subunit B1 OS=Mus musculus GN=Katnb1 PE=1 SV=1	3	2	-0.405514	0.00197093	0.0586487	(DKO_1 - WT) - (DKO_2 - WT)	no hit
Trip6	B2RS30|Q9Z1Y4	Thyroid hormone receptor interactor 6 OS=Mus musculus GN=Trip6 PE=1 SV=1|Thyroid receptor-interacting protein 6 OS=Mus musculus GN=Trip6 PE=1 SV=1	3	2	-0.405095	0.00615052	0.0941	DKO_1 - WT	no hit
Lage3	J3JS94|Q9CR70	EKC/KEOPS complex subunit Lage3 OS=Mus musculus GN=Lage3 PE=1 SV=1|EKC/KEOPS complex subunit Lage3 OS=Mus musculus GN=Lage3 PE=2 SV=1	3	2	-0.405093	0.00582236	0.0996101	(DKO_1 - WT) - (DKO_2 - WT)	no hit
F2r	P30558	Proteinase-activated receptor 1 OS=Mus musculus GN=F2r PE=1 SV=2	3	2	-0.404743	0.0134878	0.148626	(DKO_1 - WT) - (DKO_2 - WT)	no hit
Phlda3	Q9WV95	Pleckstrin homology-like domain family A member 3 OS=Mus musculus GN=Phlda3 PE=1 SV=1	3	2	-0.404624	0.00502747	0.0926511	(DKO_1 - WT) - (DKO_2 - WT)	no hit
Syt4	P40749	Synaptotagmin-4 OS=Mus musculus GN=Syt4 PE=1 SV=2	3	2	-0.404538	0.00198997	0.0588682	(DKO_1 - WT) - (DKO_2 - WT)	no hit
Svep1	A2AVA0	Sushi, von Willebrand factor type A, EGF and pentraxin domain-containing protein 1 OS=Mus musculus GN=Svep1 PE=1 SV=1	3	2	-0.404391	0.00227667	0.0520995	DKO_1 - WT	no hit
Celsr1	O35161	Cadherin EGF LAG seven-pass G-type receptor 1 OS=Mus musculus GN=Celsr1 PE=1 SV=3	3	2	-0.403942	0.00653037	0.104753	(DKO_1 - WT) - (DKO_2 - WT)	no hit
Ikbip	E9QMH7|Q9DBZ1|Q9DBZ1-2	Inhibitor of nuclear factor kappa-B kinase-interacting protein OS=Mus musculus GN=Ikbip PE=1 SV=1|Inhibitor of nuclear factor kappa-B kinase-interacting protein OS=Mus musculus GN=Ikbip PE=1 SV=2|Isoform 2 of Inhibitor of nuclear factor kappa-B kinase-interacting protein OS=Mus musculus GN=Ikbip	3	2	-0.403655	0.00571022	0.0899083	DKO_1 - WT	no hit
Sp3	O70494|O70494-2|O70494-3	Transcription factor Sp3 OS=Mus musculus GN=Sp3 PE=1 SV=2|Isoform 2 of Transcription factor Sp3 OS=Mus musculus GN=Sp3|Isoform 3 of Transcription factor Sp3 OS=Mus musculus GN=Sp3	3	2	-0.403361	0.00743479	0.103943	DKO_1 - WT	no hit
Itm2b	O89051	Integral membrane protein 2B OS=Mus musculus GN=Itm2b PE=1 SV=1	3	2	-0.403212	0.011856	0.139247	(DKO_1 - WT) - (DKO_2 - WT)	no hit
Ptn	P63089	Pleiotrophin OS=Mus musculus GN=Ptn PE=1 SV=1	3	2	-0.402913	0.0111706	0.133944	(DKO_1 - WT) - (DKO_2 - WT)	no hit
Gas6	Q61592	Growth arrest-specific protein 6 OS=Mus musculus GN=Gas6 PE=2 SV=2	3	2	-0.402719	0.00390946	0.0817803	(DKO_1 - WT) - (DKO_2 - WT)	no hit
Pcsk5	Q04592|Q04592-2	Proprotein convertase subtilisin/kexin type 5 OS=Mus musculus GN=Pcsk5 PE=1 SV=3|Isoform PC5A of Proprotein convertase subtilisin/kexin type 5 OS=Mus musculus GN=Pcsk5	3	2	-0.402198	0.00318111	0.0736541	(DKO_1 - WT) - (DKO_2 - WT)	no hit
Cd109	A6MDD3|Q8R422	CD109 antigen OS=Mus musculus GN=Cd109 PE=1 SV=1|CD109 antigen OS=Mus musculus GN=Cd109 PE=1 SV=1	3	2	-0.401603	0.00742174	0.111082	(DKO_1 - WT) - (DKO_2 - WT)	no hit
Fam92a1	Q8BP22	Protein FAM92A1 OS=Mus musculus GN=Fam92a1 PE=1 SV=1	3	2	-0.400906	0.00229257	0.0641032	(DKO_1 - WT) - (DKO_2 - WT)	no hit
Slc7a7	Q9Z1K8	Y+L amino acid transporter 1 OS=Mus musculus GN=Slc7a7 PE=1 SV=1	3	2	-0.400778	0.00223341	0.31496	DKO_2 - WT	no hit
Nrp2	O35375|O35375-2|O35375-3|O35375-4|O35375-5|O35375-6	Neuropilin-2 OS=Mus musculus GN=Nrp2 PE=1 SV=2|Isoform A0 of Neuropilin-2 OS=Mus musculus GN=Nrp2|Isoform A5 of Neuropilin-2 OS=Mus musculus GN=Nrp2|Isoform A17 of Neuropilin-2 OS=Mus musculus GN=Nrp2|Isoform B0 of Neuropilin-2 OS=Mus musculus GN=Nrp2|Isoform B5 of Neuropilin-2 OS=Mus musculus GN=Nrp2	3	2	-0.400769	0.00398903	0.0730984	DKO_1 - WT	no hit
Acsf2	Q8VCW8	Acyl-CoA synthetase family member 2, mitochondrial OS=Mus musculus GN=Acsf2 PE=1 SV=1	3	2	-0.40032	0.00260811	0.0567751	DKO_1 - WT	no hit
Crtap	Q9CYD3	Cartilage-associated protein OS=Mus musculus GN=Crtap PE=1 SV=3	3	2	-0.39999	0.00248837	0.0554527	DKO_1 - WT	no hit
St3gal2	Q11204	CMP-N-acetylneuraminate-beta-galactosamide-alpha-2,3-sialyltransferase 2 OS=Mus musculus GN=St3gal2 PE=2 SV=2	3	2	-0.39992	0.00434981	0.0777334	DKO_1 - WT	no hit
Fzd1	O70421	Frizzled-1 OS=Mus musculus GN=Fzd1 PE=2 SV=3	3	2	-0.399635	0.00970408	0.12743	(DKO_1 - WT) - (DKO_2 - WT)	no hit
Epha4	Q03137	Ephrin type-A receptor 4 OS=Mus musculus GN=Epha4 PE=1 SV=2	3	2	-0.399188	0.00377255	0.0709775	DKO_1 - WT	no hit
Tspyl5	Q69ZB3	Testis-specific Y-encoded-like protein 5 OS=Mus musculus GN=Tspyl5 PE=2 SV=2	3	2	-0.398954	0.00368962	0.0795639	(DKO_1 - WT) - (DKO_2 - WT)	no hit
Utf1	Q6J1H4	Undifferentiated embryonic cell transcription factor 1 OS=Mus musculus GN=Utf1 PE=1 SV=2	3	2	-0.3988	0.00604959	0.0929946	DKO_1 - WT	no hit
Ston1	Q8CDJ8	Stonin-1 OS=Mus musculus GN=Ston1 PE=1 SV=2	3	2	-0.398778	0.00283483	0.0696573	(DKO_1 - WT) - (DKO_2 - WT)	no hit
Slc16a3	P57787|Q3UDP9	Monocarboxylate transporter 4 OS=Mus musculus GN=Slc16a3 PE=1 SV=1|Monocarboxylate transporter 4 OS=Mus musculus GN=Slc16a3 PE=1 SV=1	3	2	-0.39861	0.0027151	0.355523	DKO_2 - WT	no hit
Kctd12	A0A0R4J2B2|Q6WVG3	BTB/POZ domain-containing protein KCTD12 OS=Mus musculus GN=Kctd12 PE=1 SV=1|BTB/POZ domain-containing protein KCTD12 OS=Mus musculus GN=Kctd12 PE=1 SV=1	3	2	-0.398412	0.0027391	0.069526	(DKO_1 - WT) - (DKO_2 - WT)	no hit
Slc20a1	Q61609	Sodium-dependent phosphate transporter 1 OS=Mus musculus GN=Slc20a1 PE=1 SV=1	3	2	-0.398209	0.0113357	0.135174	(DKO_1 - WT) - (DKO_2 - WT)	no hit
Igf2	E9QLW5|P09535	Insulin-like growth factor II OS=Mus musculus GN=Igf2 PE=1 SV=1|Insulin-like growth factor II OS=Mus musculus GN=Igf2 PE=1 SV=1	3	2	-0.397679	0.029365	0.222536	(DKO_1 - WT) - (DKO_2 - WT)	no hit
Tbc1d9b	Q5SVR0|Q5SVR0-2	TBC1 domain family member 9B OS=Mus musculus GN=Tbc1d9b PE=1 SV=1|Isoform 2 of TBC1 domain family member 9B OS=Mus musculus GN=Tbc1d9b	3	2	-0.397564	0.00450663	0.0792263	DKO_1 - WT	no hit
Hadha	Q8BMS1	Trifunctional enzyme subunit alpha, mitochondrial OS=Mus musculus GN=Hadha PE=1 SV=1	3	2	-0.39719	0.0034799	0.0684797	DKO_1 - WT	no hit
Phlda3	Q9WV95	Pleckstrin homology-like domain family A member 3 OS=Mus musculus GN=Phlda3 PE=1 SV=1	3	2	-0.396919	0.00564065	0.0898922	DKO_1 - WT	no hit
Anpep	P97449	Aminopeptidase N OS=Mus musculus GN=Anpep PE=1 SV=4	3	2	-0.396805	0.00428455	0.471083	DKO_2 - WT	no hit
Tead1	E9PZ73|E9QAK6|Q3UFP5|Q3USK5	Transcriptional enhancer factor TEF-1 OS=Mus musculus GN=Tead1 PE=1 SV=1|Transcriptional enhancer factor TEF-1 OS=Mus musculus GN=Tead1 PE=1 SV=1|TEA domain family member 1, isoform CRA_a OS=Mus musculus GN=Tead1 PE=1 SV=1|Transcriptional enhancer factor TEF-1 OS=Mus musculus GN=Tead1 PE=1 SV=1	3	2	-0.396103	0.011713	0.130778	DKO_1 - WT	no hit
Ca2	P00920	Carbonic anhydrase 2 OS=Mus musculus GN=Ca2 PE=1 SV=4	3	2	-0.395831	0.0140988	0.775074	DKO_2 - WT	no hit
Gas1	A0A0R4J0T7|Q01721	Growth arrest-specific protein 1 OS=Mus musculus GN=Gas1 PE=1 SV=1|Growth arrest-specific protein 1 OS=Mus musculus GN=Gas1 PE=2 SV=2	3	2	-0.395799	0.00707406	0.101525	DKO_1 - WT	no hit
Fam174b	Q8K064	Membrane protein FAM174B OS=Mus musculus GN=Fam174b PE=2 SV=2	3	2	-0.39504	0.00260814	0.0567751	DKO_1 - WT	no hit
Nfia	B1AUB9|B1AUC0|Q02780|Q02780-2|Q02780-3|Q02780-4|Q02780-5|Q02780-6|Q02780-7	Nuclear factor 1 OS=Mus musculus GN=Nfia PE=1 SV=1|Nuclear factor 1 OS=Mus musculus GN=Nfia PE=1 SV=1|Nuclear factor 1 A-type OS=Mus musculus GN=Nfia PE=1 SV=1|Isoform 1 of Nuclear factor 1 A-type OS=Mus musculus GN=Nfia|Isoform 3 of Nuclear factor 1 A-type OS=Mus musculus GN=Nfia|Isoform 4 of Nuclear factor 1 A-type OS=Mus musculus GN=Nfia|Isoform 5 of Nuclear factor 1 A-type OS=Mus musculus GN=…	3	2	-0.39483	0.00578362	0.090584	DKO_1 - WT	no hit
Csrp2	P97314	Cysteine and glycine-rich protein 2 OS=Mus musculus GN=Csrp2 PE=1 SV=3	3	2	-0.394162	0.0044546	0.0881852	(DKO_1 - WT) - (DKO_2 - WT)	no hit
Itpr3	P70227	Inositol 1,4,5-trisphosphate receptor type 3 OS=Mus musculus GN=Itpr3 PE=1 SV=3	3	2	-0.393283	0.00391657	0.0817803	(DKO_1 - WT) - (DKO_2 - WT)	no hit
Limd2	Q8BGB5	LIM domain-containing protein 2 OS=Mus musculus GN=Limd2 PE=1 SV=1	3	2	-0.392915	0.00432843	0.0775649	DKO_1 - WT	no hit
Tnfaip8	D3YWJ5|D3Z312|D3Z325|J3QM73|Q921Z5	Tumor necrosis factor alpha-induced protein 8 OS=Mus musculus GN=Tnfaip8 PE=1 SV=1|Tumor necrosis factor alpha-induced protein 8 OS=Mus musculus GN=Tnfaip8 PE=1 SV=1|Tumor necrosis factor alpha-induced protein 8 OS=Mus musculus GN=Tnfaip8 PE=1 SV=1|Tumor necrosis factor alpha-induced protein 8 (Fragment) OS=Mus musculus GN=Tnfaip8 PE=1 SV=1|Tumor necrosis factor alpha-induced protein 8 OS=Mus mus…	3	2	-0.392633	0.0031905	0.0736541	(DKO_1 - WT) - (DKO_2 - WT)	no hit
Fam174b	Q8K064	Membrane protein FAM174B OS=Mus musculus GN=Fam174b PE=2 SV=2	3	2	-0.391866	0.00274878	0.069526	(DKO_1 - WT) - (DKO_2 - WT)	no hit
Wdr81	K4DI77|Q5ND34	WD repeat-containing protein 81 (Fragment) OS=Mus musculus GN=Wdr81 PE=1 SV=1|WD repeat-containing protein 81 OS=Mus musculus GN=Wdr81 PE=1 SV=2	3	2	-0.391303	0.0211539	0.183702	DKO_1 - WT	no hit
Zrsr1	Q64707|Q793C9	U2 small nuclear ribonucleoprotein auxiliary factor 35 kDa subunit-related protein 1 OS=Mus musculus GN=Zrsr1 PE=1 SV=1|U2 small nuclear ribonucleoprotein auxiliary factor (U2AF) 1, related sequence 1 OS=Mus musculus GN=Zrsr1 PE=1 SV=1	3	2	-0.391157	0.0102431	0.639601	DKO_2 - WT	no hit
Eef2k	O08796	Eukaryotic elongation factor 2 kinase OS=Mus musculus GN=Eef2k PE=1 SV=1	3	2	-0.391108	0.00566763	0.0898922	DKO_1 - WT	no hit
Cd44	A2APM1|A2APM2|A2APM3|A2APM4|A2APM5|E9QKM8|P15379|P15379-10|P15379-11|P15379-2|P15379-3|P15379-4|P15379-5|P15379-6|P15379-7|P15379-8|P15379-9|Q3U8S1|Q80X37	CD44 antigen OS=Mus musculus GN=Cd44 PE=1 SV=1|CD44 antigen OS=Mus musculus GN=Cd44 PE=1 SV=1|CD44 antigen OS=Mus musculus GN=Cd44 PE=1 SV=1|CD44 antigen OS=Mus musculus GN=Cd44 PE=1 SV=1|CD44 antigen OS=Mus musculus GN=Cd44 PE=1 SV=1|CD44 antigen OS=Mus musculus GN=Cd44 PE=1 SV=1|CD44 antigen OS=Mus musculus GN=Cd44 PE=1 SV=3|Isoform 8 of CD44 antigen OS=Mus musculus GN=Cd44|Isoform 9 of CD44 an…	3	2	-0.391062	0.00477844	0.0809476	DKO_1 - WT	no hit
Bet1l	O35153	BET1-like protein OS=Mus musculus GN=Bet1l PE=1 SV=1	3	2	-0.390851	0.0127109	0.144101	(DKO_1 - WT) - (DKO_2 - WT)	no hit
Msn	P26041	Moesin OS=Mus musculus GN=Msn PE=1 SV=3	3	2	-0.390687	0.00309409	0.366853	DKO_2 - WT	no hit
Micu2	Q8CD10	Calcium uptake protein 2, mitochondrial OS=Mus musculus GN=Micu2 PE=1 SV=2	3	2	-0.390549	0.00263086	0.0570783	DKO_1 - WT	no hit
Pcgf2	P23798	Polycomb group RING finger protein 2 OS=Mus musculus GN=Pcgf2 PE=1 SV=2	3	2	-0.389844	0.0117765	0.138899	(DKO_1 - WT) - (DKO_2 - WT)	no hit
Uck1	A2AN37|F7CBX2|P52623	Uridine kinase OS=Mus musculus GN=Uck1 PE=1 SV=1|Uridine-cytidine kinase 1 (Fragment) OS=Mus musculus GN=Uck1 PE=1 SV=1|Uridine-cytidine kinase 1 OS=Mus musculus GN=Uck1 PE=1 SV=2	3	2	-0.389648	0.0105706	0.130803	(DKO_1 - WT) - (DKO_2 - WT)	no hit
Ece1	Q4PZA2|Q4PZA2-2|Q4PZA2-3|Q4PZA2-4	Endothelin-converting enzyme 1 OS=Mus musculus GN=Ece1 PE=1 SV=1|Isoform A of Endothelin-converting enzyme 1 OS=Mus musculus GN=Ece1|Isoform C of Endothelin-converting enzyme 1 OS=Mus musculus GN=Ece1|Isoform D of Endothelin-converting enzyme 1 OS=Mus musculus GN=Ece1	3	2	-0.389564	0.00348363	0.0684797	DKO_1 - WT	no hit
Kif23	E9Q5G3	Kinesin-like protein KIF23 OS=Mus musculus GN=Kif23 PE=1 SV=1	3	2	-0.389223	0.00444174	0.0786145	DKO_1 - WT	no hit
Trnau1ap	Q80VC6	tRNA selenocysteine 1-associated protein 1 OS=Mus musculus GN=Trnau1ap PE=1 SV=2	3	2	-0.388793	0.0126811	0.144101	(DKO_1 - WT) - (DKO_2 - WT)	no hit
Ephx1	E9PWK1|Q9D379	Epoxide hydrolase 1 OS=Mus musculus GN=Ephx1 PE=1 SV=1|Epoxide hydrolase 1 OS=Mus musculus GN=Ephx1 PE=1 SV=2	3	2	-0.388527	0.00634409	0.0954048	DKO_1 - WT	no hit
Msn	P26041	Moesin OS=Mus musculus GN=Msn PE=1 SV=3	3	2	-0.386966	0.0032889	0.0657117	DKO_1 - WT	no hit
Nup58	Q8R332|Q8R332-2|Q8R332-3|Q8R332-4	Nucleoporin p58/p45 OS=Mus musculus GN=Nup58 PE=1 SV=1|Isoform 2 of Nucleoporin p58/p45 OS=Mus musculus GN=Nup58|Isoform 3 of Nucleoporin p58/p45 OS=Mus musculus GN=Nup58|Isoform 4 of Nucleoporin p58/p45 OS=Mus musculus GN=Nup58	3	2	-0.386566	0.0240713	0.199937	(DKO_1 - WT) - (DKO_2 - WT)	no hit
Pcdh18	Q8VHR0	Protocadherin 18 OS=Mus musculus GN=Pcdh18 PE=1 SV=2	3	2	-0.386146	0.0131139	0.746228	DKO_2 - WT	no hit
Pcgf6	Q99NA9	Polycomb group RING finger protein 6 OS=Mus musculus GN=Pcgf6 PE=1 SV=1	3	2	-0.385774	0.00359421	0.0700169	DKO_1 - WT	no hit
Q3USZ8	Q3USZ8	Deleted in autism protein 1 homolog OS=Mus musculus PE=1 SV=2	3	2	-0.38567	0.00458237	0.0882071	(DKO_1 - WT) - (DKO_2 - WT)	no hit
Eef2k	O08796	Eukaryotic elongation factor 2 kinase OS=Mus musculus GN=Eef2k PE=1 SV=1	3	2	-0.385305	0.00619012	0.102962	(DKO_1 - WT) - (DKO_2 - WT)	no hit
Akap12	Q9WTQ5	A-kinase anchor protein 12 OS=Mus musculus GN=Akap12 PE=1 SV=1	3	2	-0.385009	0.00724609	0.102309	DKO_1 - WT	no hit
Triobp	Q99KW3|Q99KW3-2|Q99KW3-4	TRIO and F-actin-binding protein OS=Mus musculus GN=Triobp PE=1 SV=3|Isoform 2 of TRIO and F-actin-binding protein OS=Mus musculus GN=Triobp|Isoform 4 of TRIO and F-actin-binding protein OS=Mus musculus GN=Triobp	3	2	-0.384764	0.00294156	0.0613566	DKO_1 - WT	no hit
Slc35f2	Q7TML3	Solute carrier family 35 member F2 OS=Mus musculus GN=Slc35f2 PE=1 SV=2	3	2	-0.384285	0.00661487	0.584367	DKO_2 - WT	no hit
Ttyh2	Q3TH73|Q3TH73-2	Protein tweety homolog 2 OS=Mus musculus GN=Ttyh2 PE=1 SV=1|Isoform 2 of Protein tweety homolog 2 OS=Mus musculus GN=Ttyh2	3	2	-0.383976	0.00386285	0.0718004	DKO_1 - WT	no hit
Btbd9	Q8C726	BTB/POZ domain-containing protein 9 OS=Mus musculus GN=Btbd9 PE=2 SV=1	3	2	-0.383561	0.0180643	0.170572	(DKO_1 - WT) - (DKO_2 - WT)	no hit
Nf2	P46662|P46662-2	Merlin OS=Mus musculus GN=Nf2 PE=1 SV=2|Isoform 2 of Merlin OS=Mus musculus GN=Nf2	3	2	-0.383543	0.00371633	0.0795639	(DKO_1 - WT) - (DKO_2 - WT)	no hit
Traf7	F8WJF7|Q8C2K8	E3 ubiquitin-protein ligase TRAF7 OS=Mus musculus GN=Traf7 PE=1 SV=1|E3 ubiquitin-protein ligase TRAF7 OS=Mus musculus GN=Traf7 PE=1 SV=1	3	2	-0.383373	0.0558057	0.297218	(DKO_1 - WT) - (DKO_2 - WT)	no hit
Lum	P51885	Lumican OS=Mus musculus GN=Lum PE=1 SV=2	3	2	-0.383144	0.00991217	0.128307	(DKO_1 - WT) - (DKO_2 - WT)	no hit
Rnf213	A0A171EBL2|E9Q555	E3 ubiquitin-protein ligase RNF213 OS=Mus musculus GN=Rnf213 PE=4 SV=1|E3 ubiquitin-protein ligase RNF213 OS=Mus musculus GN=Rnf213 PE=1 SV=2	3	2	-0.38303	0.00373239	0.0709775	DKO_1 - WT	no hit
Tmem176b	Q9R1Q6	Transmembrane protein 176B OS=Mus musculus GN=Tmem176b PE=1 SV=1	3	2	-0.382707	0.0226434	0.870688	DKO_2 - WT	no hit
Coq3	Q8BMS4	Ubiquinone biosynthesis O-methyltransferase, mitochondrial OS=Mus musculus GN=Coq3 PE=1 SV=1	3	2	-0.382618	0.00991212	0.122117	DKO_1 - WT	no hit
Dlk1	Q09163|Q925U3	Protein delta homolog 1 OS=Mus musculus GN=Dlk1 PE=1 SV=1|Delta-like OS=Mus musculus GN=Dlk1 PE=1 SV=1	3	2	-0.382289	0.0789803	0.357256	(DKO_1 - WT) - (DKO_2 - WT)	no hit
Ap2s1	P62743|Q3UJ76	AP-2 complex subunit sigma OS=Mus musculus GN=Ap2s1 PE=1 SV=1|AP-2 complex subunit sigma OS=Mus musculus GN=Ap2s1 PE=1 SV=1	3	2	-0.382286	0.00993954	0.122117	DKO_1 - WT	no hit
Erbb2ip	B2RUJ2|B7ZNX6|Q80TH2|Q80TH2-1|Q80TH2-2	Erbb2ip protein OS=Mus musculus GN=Erbb2ip PE=1 SV=1|Erbb2ip protein OS=Mus musculus GN=Erbb2ip PE=1 SV=1|Protein LAP2 OS=Mus musculus GN=Erbb2ip PE=1 SV=3|Isoform 1 of Protein LAP2 OS=Mus musculus GN=Erbb2ip|Isoform 2 of Protein LAP2 OS=Mus musculus GN=Erbb2ip	3	2	-0.381145	0.00988698	0.128307	(DKO_1 - WT) - (DKO_2 - WT)	no hit
Smarcd2	Q99JR8|Q99JR8-2	SWI/SNF-related matrix-associated actin-dependent regulator of chromatin subfamily D member 2 OS=Mus musculus GN=Smarcd2 PE=1 SV=2|Isoform 2 of SWI/SNF-related matrix-associated actin-dependent regulator of chromatin subfamily D member 2 OS=Mus musculus GN=Smarcd2	3	2	-0.380133	0.00472091	0.0808851	DKO_1 - WT	no hit
Kctd12	A0A0R4J2B2|Q6WVG3	BTB/POZ domain-containing protein KCTD12 OS=Mus musculus GN=Kctd12 PE=1 SV=1|BTB/POZ domain-containing protein KCTD12 OS=Mus musculus GN=Kctd12 PE=1 SV=1	3	2	-0.379603	0.00372905	0.0709775	DKO_1 - WT	no hit
Palld	Q9ET54|Q9ET54-4|Q9ET54-6	Palladin OS=Mus musculus GN=Palld PE=1 SV=2|Isoform 4 of Palladin OS=Mus musculus GN=Palld|Isoform 6 of Palladin OS=Mus musculus GN=Palld	3	2	-0.379601	0.00314733	0.0644061	DKO_1 - WT	no hit
Actbl2	Q8BFZ3	Beta-actin-like protein 2 OS=Mus musculus GN=Actbl2 PE=1 SV=1	3	2	-0.379388	0.168001	0.477366	DKO_1 - WT	no hit
Slc2a3	P32037|Q3TPL8	Solute carrier family 2, facilitated glucose transporter member 3 OS=Mus musculus GN=Slc2a3 PE=1 SV=1|Solute carrier family 2 (Facilitated glucose transporter), member 3 OS=Mus musculus GN=Slc2a3 PE=1 SV=1	3	2	-0.37904	0.00404157	0.459383	DKO_2 - WT	no hit
Traf7	F8WJF7|Q8C2K8	E3 ubiquitin-protein ligase TRAF7 OS=Mus musculus GN=Traf7 PE=1 SV=1|E3 ubiquitin-protein ligase TRAF7 OS=Mus musculus GN=Traf7 PE=1 SV=1	3	2	-0.379033	0.0581761	0.297156	DKO_1 - WT	no hit
Rpl36-ps3|Rpl36	A0A140T8K6|Q6ZWZ4	60S ribosomal protein L36 OS=Mus musculus GN=Rpl36-ps3 PE=3 SV=1|60S ribosomal protein L36 OS=Mus musculus GN=Rpl36 PE=1 SV=1	3	2	-0.378974	0.00501394	0.511254	DKO_2 - WT	no hit
Igfbpl1	Q80W15	Insulin-like growth factor-binding protein-like 1 OS=Mus musculus GN=Igfbpl1 PE=2 SV=1	3	2	-0.37823	0.0218574	0.187303	(DKO_1 - WT) - (DKO_2 - WT)	no hit
Atp7a	A2AG68|Q64430	Copper-transporting ATPase 1 OS=Mus musculus GN=Atp7a PE=1 SV=1|Copper-transporting ATPase 1 OS=Mus musculus GN=Atp7a PE=1 SV=3	3	2	-0.377969	0.00392084	0.072257	DKO_1 - WT	no hit
Fam207a	P58468	Protein FAM207A OS=Mus musculus GN=Fam207a PE=1 SV=1	3	2	-0.377891	0.00861208	0.114246	DKO_1 - WT	no hit
Tpm4	Q6IRU2	Tropomyosin alpha-4 chain OS=Mus musculus GN=Tpm4 PE=1 SV=3	3	2	-0.37767	0.010403	0.130235	(DKO_1 - WT) - (DKO_2 - WT)	no hit
Dgcr2|Gm20518	A0A0R4J1M6|E9Q548|E9QNU3|P98154|Q6P5A9	DiGeorge syndrome critical region gene 2, isoform CRA_c OS=Mus musculus GN=Dgcr2 PE=4 SV=1|Protein Gm20518 OS=Mus musculus GN=Gm20518 PE=4 SV=1|Integral membrane protein DGCR2/IDD OS=Mus musculus GN=Dgcr2 PE=4 SV=1|Integral membrane protein DGCR2/IDD OS=Mus musculus GN=Dgcr2 PE=2 SV=1|DiGeorge syndrome critical region gene 2 OS=Mus musculus GN=Dgcr2 PE=2 SV=1	3	2	-0.377133	0.00690023	0.101042	DKO_1 - WT	no hit
Gon4l	E9Q507|K4DI71|Q9DB00	GON-4-like protein OS=Mus musculus GN=Gon4l PE=1 SV=1|GON-4-like protein OS=Mus musculus GN=Gon4l PE=1 SV=1|GON-4-like protein OS=Mus musculus GN=Gon4l PE=1 SV=3	3	2	-0.376796	0.0123225	0.134767	DKO_1 - WT	no hit
Cgnl1	B2RSU6|D3Z3H4|Q6AW69|Q6AW69-3|Q6AW69-4|Q6AW69-5	Cingulin-like 1 OS=Mus musculus GN=Cgnl1 PE=1 SV=1|Cingulin-like protein 1 OS=Mus musculus GN=Cgnl1 PE=1 SV=1|Cingulin-like protein 1 OS=Mus musculus GN=Cgnl1 PE=1 SV=2|Isoform 3 of Cingulin-like protein 1 OS=Mus musculus GN=Cgnl1|Isoform 4 of Cingulin-like protein 1 OS=Mus musculus GN=Cgnl1|Isoform 5 of Cingulin-like protein 1 OS=Mus musculus GN=Cgnl1	3	2	-0.376199	0.00479319	0.0809725	DKO_1 - WT	no hit
Rab33b	O35963|Q0PD21	Ras-related protein Rab-33B OS=Mus musculus GN=Rab33b PE=1 SV=1|RAB33B, member of RAS oncogene family, isoform CRA_a OS=Mus musculus GN=Rab33b PE=1 SV=1	3	2	-0.375633	0.00715505	0.101716	DKO_1 - WT	no hit
Gpkow	Q56A08	G patch domain and KOW motifs-containing protein OS=Mus musculus GN=Gpkow PE=1 SV=2	3	2	-0.375607	0.00946795	0.119259	DKO_1 - WT	no hit
Akap12	Q9WTQ5	A-kinase anchor protein 12 OS=Mus musculus GN=Akap12 PE=1 SV=1	3	2	-0.375502	0.0083496	0.117492	(DKO_1 - WT) - (DKO_2 - WT)	no hit
BC067074	F6RXI4	Protein BC067074 (Fragment) OS=Mus musculus GN=BC067074 PE=1 SV=1	3	2	-0.37506	0.00920785	0.122904	(DKO_1 - WT) - (DKO_2 - WT)	no hit
Cubn	Q9JLB4	Cubilin OS=Mus musculus GN=Cubn PE=1 SV=3	3	2	-0.374438	0.0253423	0.197829	DKO_1 - WT	no hit
Ror2	E9PUN5|Q9Z138	Tyrosine-protein kinase transmembrane receptor ROR2 OS=Mus musculus GN=Ror2 PE=1 SV=1|Tyrosine-protein kinase transmembrane receptor ROR2 OS=Mus musculus GN=Ror2 PE=1 SV=2	3	2	-0.374133	0.00484691	0.0908726	(DKO_1 - WT) - (DKO_2 - WT)	no hit
Sorcs3	Q1HL22|Q8VI51	SorCS3 OS=Mus musculus GN=Sorcs3 PE=1 SV=1|VPS10 domain-containing receptor SorCS3 OS=Mus musculus GN=Sorcs3 PE=1 SV=1	3	2	-0.374047	0.0033766	0.0765875	(DKO_1 - WT) - (DKO_2 - WT)	no hit
Dip2a	D3Z7D3|F8WI56|Q8BWT5	Disco-interacting protein 2 homolog A OS=Mus musculus GN=Dip2a PE=1 SV=1|Disco-interacting protein 2 homolog A OS=Mus musculus GN=Dip2a PE=1 SV=1|Disco-interacting protein 2 homolog A OS=Mus musculus GN=Dip2a PE=1 SV=3	3	2	-0.374031	0.0366071	0.96119	DKO_2 - WT	no hit
Sept9	A2A6U3|Q80UG5|Q80UG5-3	Septin-9 OS=Mus musculus GN=Sept9 PE=1 SV=1|Septin-9 OS=Mus musculus GN=Sept9 PE=1 SV=1|Isoform 3 of Septin-9 OS=Mus musculus GN=Sept9	3	2	-0.373682	0.00909598	0.117075	DKO_1 - WT	no hit
Cyp46a1	Q3US73|Q9WVK8	Cholesterol 24-hydroxylase OS=Mus musculus GN=Cyp46a1 PE=1 SV=1|Cholesterol 24-hydroxylase OS=Mus musculus GN=Cyp46a1 PE=1 SV=1	3	2	-0.373329	0.0427843	0.263573	(DKO_1 - WT) - (DKO_2 - WT)	no hit
Nell1	D3YWD8|Q2VWQ2	Protein kinase C-binding protein NELL1 OS=Mus musculus GN=Nell1 PE=1 SV=1|Protein kinase C-binding protein NELL1 OS=Mus musculus GN=Nell1 PE=2 SV=1	3	2	-0.373212	0.00445888	0.0881852	(DKO_1 - WT) - (DKO_2 - WT)	no hit
Itm2c	A0A087WRM2|Q91VK4	Integral membrane protein 2C OS=Mus musculus GN=Itm2c PE=1 SV=1|Integral membrane protein 2C OS=Mus musculus GN=Itm2c PE=1 SV=2	3	2	-0.372838	0.0232132	0.195057	(DKO_1 - WT) - (DKO_2 - WT)	no hit
Eif2ak3	E9QQ30	Eukaryotic translation initiation factor 2-alpha kinase 3 OS=Mus musculus GN=Eif2ak3 PE=1 SV=1	3	2	-0.372489	0.00731864	0.102833	DKO_1 - WT	no hit
Slc27a3	G3X8Y7|O88561	Long-chain fatty acid transport protein 3 OS=Mus musculus GN=Slc27a3 PE=1 SV=1|Long-chain fatty acid transport protein 3 OS=Mus musculus GN=Slc27a3 PE=1 SV=2	3	2	-0.37213	0.00629782	0.103529	(DKO_1 - WT) - (DKO_2 - WT)	no hit
Wdr81	K4DI77|Q5ND34	WD repeat-containing protein 81 (Fragment) OS=Mus musculus GN=Wdr81 PE=1 SV=1|WD repeat-containing protein 81 OS=Mus musculus GN=Wdr81 PE=1 SV=2	3	2	-0.37196	0.0267274	0.210907	(DKO_1 - WT) - (DKO_2 - WT)	no hit
Ube2i	P63280	SUMO-conjugating enzyme UBC9 OS=Mus musculus GN=Ube2i PE=1 SV=1	3	2	-0.371952	0.0279963	0.21518	(DKO_1 - WT) - (DKO_2 - WT)	no hit
Pcdhga8	Q91XX0	MCG133388, isoform CRA_r OS=Mus musculus GN=Pcdhga8 PE=1 SV=1	3	2	-0.371588	0.00752149	0.104704	DKO_1 - WT	no hit
Tmem59	Q9QY73	Transmembrane protein 59 OS=Mus musculus GN=Tmem59 PE=1 SV=2	3	2	-0.371421	0.0130277	0.146345	(DKO_1 - WT) - (DKO_2 - WT)	no hit
Med17	Q8VCD5	Mediator of RNA polymerase II transcription subunit 17 OS=Mus musculus GN=Med17 PE=1 SV=1	3	2	-0.371106	0.018161	0.168883	DKO_1 - WT	no hit
Tbcb	Q9D1E6	Tubulin-folding cofactor B OS=Mus musculus GN=Tbcb PE=1 SV=2	3	2	-0.370522	0.00510723	0.0935771	(DKO_1 - WT) - (DKO_2 - WT)	no hit
Mrpl33	Q9CQP0	39S ribosomal protein L33, mitochondrial OS=Mus musculus GN=Mrpl33 PE=1 SV=1	3	2	-0.370388	0.00498788	0.0831783	DKO_1 - WT	no hit
Nol12	Q8BG17	Nucleolar protein 12 OS=Mus musculus GN=Nol12 PE=1 SV=1	3	2	-0.369598	0.0277711	0.20824	DKO_1 - WT	no hit
Islr	Q6GU68	Immunoglobulin superfamily containing leucine-rich repeat protein OS=Mus musculus GN=Islr PE=1 SV=1	3	2	-0.369556	0.010712	0.655	DKO_2 - WT	no hit
H2-Eb1|P20040	O78196|P04231|P18468|P20040	H-2 class II histocompatibility antigen, I-A beta chain OS=Mus musculus GN=H2-Eb1 PE=1 SV=1|H-2 class II histocompatibility antigen, E-S beta chain (Fragment) OS=Mus musculus GN=H2-Eb1 PE=1 SV=1|H-2 class II histocompatibility antigen, I-A beta chain OS=Mus musculus GN=H2-Eb1 PE=1 SV=1|H-2 class II histocompatibility antigen, E-Q beta chain OS=Mus musculus PE=1 SV=1	3	2	-0.369146	0.027019	0.204757	DKO_1 - WT	no hit
Tmem132c	E9QP73	Transmembrane protein 132C OS=Mus musculus GN=Tmem132c PE=1 SV=1	3	2	-0.368119	0.00414161	0.0847527	(DKO_1 - WT) - (DKO_2 - WT)	no hit
Trim2	E9QKC6|Q3UHH4|Q9ESN6	Tripartite motif-containing protein 2 OS=Mus musculus GN=Trim2 PE=1 SV=1|Tripartite motif-containing protein 2 OS=Mus musculus GN=Trim2 PE=1 SV=1|Tripartite motif-containing protein 2 OS=Mus musculus GN=Trim2 PE=1 SV=1	3	2	-0.367738	0.00437686	0.0876318	(DKO_1 - WT) - (DKO_2 - WT)	no hit
Pltp	A2A5K2|P55065|Q3UFS5	Phospholipid transfer protein OS=Mus musculus GN=Pltp PE=1 SV=1|Phospholipid transfer protein OS=Mus musculus GN=Pltp PE=1 SV=1|Phospholipid transfer protein OS=Mus musculus GN=Pltp PE=1 SV=1	3	2	-0.367675	0.0116704	0.130778	DKO_1 - WT	no hit
Plxdc2	Q9DC11	Plexin domain-containing protein 2 OS=Mus musculus GN=Plxdc2 PE=1 SV=1	3	2	-0.367605	0.010047	0.122739	DKO_1 - WT	no hit
Fbn2	Q61555	Fibrillin-2 OS=Mus musculus GN=Fbn2 PE=1 SV=2	3	2	-0.366778	0.00635346	0.0954048	DKO_1 - WT	no hit
Nt5c3b	Q3UFY7	7-methylguanosine phosphate-specific 5'-nucleotidase OS=Mus musculus GN=Nt5c3b PE=1 SV=3	3	2	-0.366264	0.00492084	0.0914692	(DKO_1 - WT) - (DKO_2 - WT)	no hit
Jak2	G5E852|Q62120	Tyrosine-protein kinase OS=Mus musculus GN=Jak2 PE=1 SV=1|Tyrosine-protein kinase JAK2 OS=Mus musculus GN=Jak2 PE=1 SV=2	3	2	-0.366218	0.0100616	0.128433	(DKO_1 - WT) - (DKO_2 - WT)	no hit
Cpne2	A0A0R4J1D0|P59108	Copine-2 OS=Mus musculus GN=Cpne2 PE=1 SV=1|Copine-2 OS=Mus musculus GN=Cpne2 PE=1 SV=1	3	2	-0.36607	0.00658843	0.104753	(DKO_1 - WT) - (DKO_2 - WT)	no hit
Mmp16	Q9WTR0	Matrix metalloproteinase-16 OS=Mus musculus GN=Mmp16 PE=2 SV=3	3	2	-0.365755	0.00492103	0.0914692	(DKO_1 - WT) - (DKO_2 - WT)	no hit
Tpd52l2	A2AUD5|Q3TAI4|Q9CYZ2	Tumor protein D54 OS=Mus musculus GN=Tpd52l2 PE=1 SV=1|Tumor protein D52-like 2, isoform CRA_c OS=Mus musculus GN=Tpd52l2 PE=1 SV=1|Tumor protein D54 OS=Mus musculus GN=Tpd52l2 PE=1 SV=1	3	2	-0.365627	0.00576041	0.0993765	(DKO_1 - WT) - (DKO_2 - WT)	no hit
Ndufa8	Q9DCJ5	NADH dehydrogenase [ubiquinone] 1 alpha subcomplex subunit 8 OS=Mus musculus GN=Ndufa8 PE=1 SV=3	3	2	-0.365583	0.0049381	0.0915241	(DKO_1 - WT) - (DKO_2 - WT)	no hit
Pdgfrb	E9QN12|E9QPE2|P05622	Platelet-derived growth factor receptor beta OS=Mus musculus GN=Pdgfrb PE=1 SV=1|Platelet-derived growth factor receptor beta OS=Mus musculus GN=Pdgfrb PE=1 SV=1|Platelet-derived growth factor receptor beta OS=Mus musculus GN=Pdgfrb PE=1 SV=1	3	2	-0.365162	0.015648	0.793034	DKO_2 - WT	no hit
Loxl1	A0A0R4J0Q4|P97873	Lysyl oxidase homolog 1 OS=Mus musculus GN=Loxl1 PE=1 SV=1|Lysyl oxidase homolog 1 OS=Mus musculus GN=Loxl1 PE=2 SV=3	3	2	-0.364983	0.00787419	0.11513	(DKO_1 - WT) - (DKO_2 - WT)	no hit
Fhl3	Q9R059	Four and a half LIM domains protein 3 OS=Mus musculus GN=Fhl3 PE=1 SV=2	3	2	-0.364846	0.00540949	0.0961408	(DKO_1 - WT) - (DKO_2 - WT)	no hit
Arl2bp	Q9D385|Q9D385-2	ADP-ribosylation factor-like protein 2-binding protein OS=Mus musculus GN=Arl2bp PE=1 SV=1|Isoform 2 of ADP-ribosylation factor-like protein 2-binding protein OS=Mus musculus GN=Arl2bp	3	2	-0.364785	0.0254517	0.204854	(DKO_1 - WT) - (DKO_2 - WT)	no hit
Ppp1r12a	Q9DBR7	Protein phosphatase 1 regulatory subunit 12A OS=Mus musculus GN=Ppp1r12a PE=1 SV=2	3	2	-0.364592	0.00869994	0.114708	DKO_1 - WT	no hit
Adgra2	J3QMG7|Q91ZV8	Adhesion G protein-coupled receptor A2 OS=Mus musculus GN=Adgra2 PE=1 SV=1|Adhesion G protein-coupled receptor A2 OS=Mus musculus GN=Adgra2 PE=1 SV=2	3	2	-0.364499	0.0123686	0.717961	DKO_2 - WT	no hit
Acot2	Q9QYR9	Acyl-coenzyme A thioesterase 2, mitochondrial OS=Mus musculus GN=Acot2 PE=1 SV=2	3	2	-0.364278	0.00444333	0.0881852	(DKO_1 - WT) - (DKO_2 - WT)	no hit
Thbs2	Q03350	Thrombospondin-2 OS=Mus musculus GN=Thbs2 PE=1 SV=2	3	2	-0.363691	0.0135318	0.148626	(DKO_1 - WT) - (DKO_2 - WT)	no hit
Atg9a	A0A087WP33|Q3ZAQ4	Autophagy-related protein 9A (Fragment) OS=Mus musculus GN=Atg9a PE=1 SV=1|Autophagy 9-like 1 protein OS=Mus musculus GN=Atg9a PE=1 SV=1	3	2	-0.363589	0.0118712	0.131639	DKO_1 - WT	no hit
Sptbn4	E9PX29|Q91ZE6	Protein Sptbn4 OS=Mus musculus GN=Sptbn4 PE=1 SV=1|Beta-spectrin 4 OS=Mus musculus GN=Sptbn4 PE=1 SV=1	3	2	-0.363574	0.0215269	0.185451	DKO_1 - WT	no hit
F11r	O88792	Junctional adhesion molecule A OS=Mus musculus GN=F11r PE=1 SV=2	3	2	-0.36357	0.0180373	0.843848	DKO_2 - WT	no hit
Arfgap1	Q9EPJ9	ADP-ribosylation factor GTPase-activating protein 1 OS=Mus musculus GN=Arfgap1 PE=1 SV=2	3	2	-0.363554	0.010599	0.126226	DKO_1 - WT	no hit
Entpd4	Q9DBT4|Q9DBT4-2	Ectonucleoside triphosphate diphosphohydrolase 4 OS=Mus musculus GN=Entpd4 PE=1 SV=1|Isoform 2 of Ectonucleoside triphosphate diphosphohydrolase 4 OS=Mus musculus GN=Entpd4	3	2	-0.363513	0.00472568	0.0808851	DKO_1 - WT	no hit
Elavl2	B1AXZ4|B1AXZ5|Q3UR02|Q564D8|Q60899|Q80Y51	ELAV-like protein OS=Mus musculus GN=Elavl2 PE=1 SV=1|ELAV-like protein OS=Mus musculus GN=Elavl2 PE=1 SV=1|ELAV-like protein OS=Mus musculus GN=Elavl2 PE=1 SV=1|ELAV-like protein OS=Mus musculus GN=Elavl2 PE=1 SV=1|ELAV-like protein 2 OS=Mus musculus GN=Elavl2 PE=2 SV=1|ELAV-like protein OS=Mus musculus GN=Elavl2 PE=1 SV=1	3	2	-0.363091	0.00493872	0.0827842	DKO_1 - WT	no hit
Usp20	Q8C6M1	Ubiquitin carboxyl-terminal hydrolase 20 OS=Mus musculus GN=Usp20 PE=1 SV=1	3	2	-0.362731	0.0113693	0.135326	(DKO_1 - WT) - (DKO_2 - WT)	no hit
Zfr2	E9Q5M4	Protein Zfr2 OS=Mus musculus GN=Zfr2 PE=1 SV=1	3	2	-0.362313	0.00618154	0.564784	DKO_2 - WT	no hit
Nras	A0A0G2JGP4|P08556|Q9D091	GTPase NRas (Fragment) OS=Mus musculus GN=Nras PE=1 SV=1|GTPase NRas OS=Mus musculus GN=Nras PE=1 SV=1|GTPase NRas OS=Mus musculus GN=Nras PE=1 SV=1	3	2	-0.362303	0.0114505	0.130778	DKO_1 - WT	no hit
Tram2	Q924Z5	Translocating chain-associated membrane protein 2 OS=Mus musculus GN=Tram2 PE=1 SV=1	3	2	-0.361297	0.00533804	0.0872239	DKO_1 - WT	no hit
Tmsb4x	P20065-2	Isoform Short of Thymosin beta-4 OS=Mus musculus GN=Tmsb4x	3	2	-0.361229	0.00433639	0.0873607	(DKO_1 - WT) - (DKO_2 - WT)	no hit
Kyat3	Q71RI9|Q71RI9-2	Kynurenine--oxoglutarate transaminase 3 OS=Mus musculus GN=Kyat3 PE=1 SV=1|Isoform 2 of Kynurenine--oxoglutarate transaminase 3 OS=Mus musculus GN=Kyat3	3	2	-0.361084	0.00455448	0.0882071	(DKO_1 - WT) - (DKO_2 - WT)	no hit
Slc39a14	A0A0R4J1V1|Q75N73	Solute carrier family 39 (Zinc transporter), member 14, isoform CRA_a OS=Mus musculus GN=Slc39a14 PE=1 SV=1|Zinc transporter ZIP14 OS=Mus musculus GN=Slc39a14 PE=1 SV=1	3	2	-0.36106	0.00438271	0.473844	DKO_2 - WT	no hit
Adcy6	F8VQ52|Q01341	Adenylate cyclase type 6 OS=Mus musculus GN=Adcy6 PE=1 SV=1|Adenylate cyclase type 6 OS=Mus musculus GN=Adcy6 PE=1 SV=1	3	2	-0.360555	0.00617652	0.0942755	DKO_1 - WT	no hit
Trip4	Q9QXN3|Q9QXN3-2	Activating signal cointegrator 1 OS=Mus musculus GN=Trip4 PE=1 SV=2|Isoform 2 of Activating signal cointegrator 1 OS=Mus musculus GN=Trip4	3	2	-0.360072	0.0100954	0.128433	(DKO_1 - WT) - (DKO_2 - WT)	no hit
Ndufa8	Q9DCJ5	NADH dehydrogenase [ubiquinone] 1 alpha subcomplex subunit 8 OS=Mus musculus GN=Ndufa8 PE=1 SV=3	3	2	-0.359779	0.00543641	0.0879194	DKO_1 - WT	no hit
Ap1ar	E9PYF7	AP1AR OS=Mus musculus GN=Ap1ar PE=1 SV=1	3	2	-0.359436	0.00892739	0.116583	DKO_1 - WT	no hit
Tpm4	Q6IRU2	Tropomyosin alpha-4 chain OS=Mus musculus GN=Tpm4 PE=1 SV=3	3	2	-0.358965	0.0136094	0.143318	DKO_1 - WT	no hit
Antxr1	A0A0N4SV16|Q9CZ52|Q9CZ52-2	Anthrax toxin receptor 1 OS=Mus musculus GN=Antxr1 PE=1 SV=1|Anthrax toxin receptor 1 OS=Mus musculus GN=Antxr1 PE=1 SV=2|Isoform 2 of Anthrax toxin receptor 1 OS=Mus musculus GN=Antxr1	3	2	-0.358557	0.00993499	0.128307	(DKO_1 - WT) - (DKO_2 - WT)	no hit
Crabp1	P62965	Cellular retinoic acid-binding protein 1 OS=Mus musculus GN=Crabp1 PE=1 SV=2	3	2	-0.358492	0.0199343	0.180103	(DKO_1 - WT) - (DKO_2 - WT)	no hit
Tes	Q3ULB1|Q921W7	Testin OS=Mus musculus GN=Tes PE=1 SV=1|Putative uncharacterized protein Tes OS=Mus musculus GN=Tes PE=1 SV=2	3	2	-0.358093	0.0046482	0.0884248	(DKO_1 - WT) - (DKO_2 - WT)	no hit
Nfatc4	Q8K120|Q8K120-2	Nuclear factor of activated T-cells, cytoplasmic 4 OS=Mus musculus GN=Nfatc4 PE=1 SV=2|Isoform 2 of Nuclear factor of activated T-cells, cytoplasmic 4 OS=Mus musculus GN=Nfatc4	3	2	-0.357734	0.00980574	0.12199	DKO_1 - WT	no hit
Ccdc137	Q8R0K4	Coiled-coil domain-containing protein 137 OS=Mus musculus GN=Ccdc137 PE=2 SV=1	3	2	-0.357724	0.0474531	0.270737	DKO_1 - WT	no hit
Pcgf2	P23798	Polycomb group RING finger protein 2 OS=Mus musculus GN=Pcgf2 PE=1 SV=2	3	2	-0.357695	0.0182509	0.168883	DKO_1 - WT	no hit
Tsfm	Q9CZR8	Elongation factor Ts, mitochondrial OS=Mus musculus GN=Tsfm PE=1 SV=1	3	2	-0.357256	0.0553263	0.296123	(DKO_1 - WT) - (DKO_2 - WT)	no hit
Stat2	E9QJX9|Q9QXJ2|Q9WVL2	Signal transducer and activator of transcription OS=Mus musculus GN=Stat2 PE=1 SV=2|Signal transducer and activator of transcription OS=Mus musculus GN=Stat2 PE=1 SV=1|Signal transducer and activator of transcription 2 OS=Mus musculus GN=Stat2 PE=1 SV=1	3	2	-0.35709	0.0228937	0.192872	(DKO_1 - WT) - (DKO_2 - WT)	no hit
Hmg20b	Q3U1L0|Q9Z104	High mobility group 20 B, isoform CRA_a OS=Mus musculus GN=Hmg20b PE=1 SV=1|SWI/SNF-related matrix-associated actin-dependent regulator of chromatin subfamily E member 1-related OS=Mus musculus GN=Hmg20b PE=1 SV=1	3	2	-0.356861	0.00539039	0.0878579	DKO_1 - WT	no hit
Prepl	Q8C167	Prolyl endopeptidase-like OS=Mus musculus GN=Prepl PE=1 SV=1	3	2	-0.356788	0.0277327	0.214306	(DKO_1 - WT) - (DKO_2 - WT)	no hit
Ppic	P30412|Q3UC73	Peptidyl-prolyl cis-trans isomerase C OS=Mus musculus GN=Ppic PE=1 SV=1|Peptidyl-prolyl cis-trans isomerase OS=Mus musculus GN=Ppic PE=1 SV=1	3	2	-0.356486	0.00598807	0.0922675	DKO_1 - WT	no hit
Blvra	Q9CY64	Biliverdin reductase A OS=Mus musculus GN=Blvra PE=1 SV=1	3	2	-0.356406	0.0267669	0.210907	(DKO_1 - WT) - (DKO_2 - WT)	no hit
Polr1d	Q9D1M1	DNA-directed RNA polymerases I and III subunit RPAC2 OS=Mus musculus GN=Polr1d PE=1 SV=1	3	2	-0.356289	0.0112333	0.129894	DKO_1 - WT	no hit
S1pr3	Q9Z0U9	Sphingosine 1-phosphate receptor 3 OS=Mus musculus GN=S1pr3 PE=2 SV=1	3	2	-0.355907	0.0123764	0.142128	(DKO_1 - WT) - (DKO_2 - WT)	no hit
Lmna	P48678	Prelamin-A/C OS=Mus musculus GN=Lmna PE=1 SV=2	3	2	-0.355903	0.0163637	0.164321	(DKO_1 - WT) - (DKO_2 - WT)	no hit
Fastkd5	A0A0R4J291|Q7TMV3	FAST kinase domain-containing protein 5, mitochondrial OS=Mus musculus GN=Fastkd5 PE=1 SV=1|FAST kinase domain-containing protein 5, mitochondrial OS=Mus musculus GN=Fastkd5 PE=2 SV=1	3	2	-0.355895	0.0219003	0.186949	DKO_1 - WT	no hit
Sema4b	Q62179	Semaphorin-4B OS=Mus musculus GN=Sema4b PE=1 SV=2	3	2	-0.355777	0.0109032	0.127546	DKO_1 - WT	no hit
Fbn1	Q61554	Fibrillin-1 OS=Mus musculus GN=Fbn1 PE=1 SV=2	3	2	-0.355684	0.00897404	0.116583	DKO_1 - WT	no hit
Gxylt2	Q810K9	Glucoside xylosyltransferase 2 OS=Mus musculus GN=Gxylt2 PE=2 SV=1	3	2	-0.35529	0.00516018	0.0935771	(DKO_1 - WT) - (DKO_2 - WT)	no hit
Kif20b	Q80WE4|Q80WE4-3|Q80WE4-4	Kinesin-like protein KIF20B OS=Mus musculus GN=Kif20b PE=1 SV=3|Isoform 3 of Kinesin-like protein KIF20B OS=Mus musculus GN=Kif20b|Isoform 4 of Kinesin-like protein KIF20B OS=Mus musculus GN=Kif20b	3	2	-0.355168	0.00524204	0.0860889	DKO_1 - WT	no hit
Fndc3b	A0A0R4J0H8|Q6NWW9	Fibronectin type III domain-containing protein 3B OS=Mus musculus GN=Fndc3b PE=1 SV=1|Fibronectin type III domain-containing protein 3B OS=Mus musculus GN=Fndc3b PE=1 SV=1	3	2	-0.354636	0.00586164	0.0911858	DKO_1 - WT	no hit
Katnal1	Q8K0T4	Katanin p60 ATPase-containing subunit A-like 1 OS=Mus musculus GN=Katnal1 PE=1 SV=1	3	2	-0.353755	0.0149605	0.157294	(DKO_1 - WT) - (DKO_2 - WT)	no hit
Syne1	Q6ZWR6|Q6ZWR6-4	Nesprin-1 OS=Mus musculus GN=Syne1 PE=1 SV=2|Isoform 4 of Nesprin-1 OS=Mus musculus GN=Syne1	3	2	-0.3536	0.0289224	0.211045	DKO_1 - WT	no hit
Slc9a3r2	A0A0R4IZX2|Q9JHL1	Na(+)/H(+) exchange regulatory cofactor NHE-RF OS=Mus musculus GN=Slc9a3r2 PE=1 SV=1|Na(+)/H(+) exchange regulatory cofactor NHE-RF2 OS=Mus musculus GN=Slc9a3r2 PE=1 SV=2	3	2	-0.35342	0.00956538	0.126119	(DKO_1 - WT) - (DKO_2 - WT)	no hit
Rad54l2	E9QKL0|Q99NG0	Helicase ARIP4 OS=Mus musculus GN=Rad54l2 PE=1 SV=1|Helicase ARIP4 OS=Mus musculus GN=Rad54l2 PE=1 SV=1	3	2	-0.353364	0.00534646	0.511254	DKO_2 - WT	no hit
Scd2	P13011	Acyl-CoA desaturase 2 OS=Mus musculus GN=Scd2 PE=1 SV=2	3	2	-0.353166	0.00671996	0.106064	(DKO_1 - WT) - (DKO_2 - WT)	no hit
Slc4a4	A7E1Z5|O88343|O88343-2	Anion exchange protein OS=Mus musculus GN=Slc4a4 PE=1 SV=1|Electrogenic sodium bicarbonate cotransporter 1 OS=Mus musculus GN=Slc4a4 PE=1 SV=2|Isoform 2 of Electrogenic sodium bicarbonate cotransporter 1 OS=Mus musculus GN=Slc4a4	3	2	-0.352818	0.00515051	0.0935771	(DKO_1 - WT) - (DKO_2 - WT)	no hit
Stx3	Q64704|Q64704-2	Syntaxin-3 OS=Mus musculus GN=Stx3 PE=1 SV=1|Isoform 3B of Syntaxin-3 OS=Mus musculus GN=Stx3	3	2	-0.352571	0.00798883	0.6246	DKO_2 - WT	no hit
Lage3	J3JS94|Q9CR70	EKC/KEOPS complex subunit Lage3 OS=Mus musculus GN=Lage3 PE=1 SV=1|EKC/KEOPS complex subunit Lage3 OS=Mus musculus GN=Lage3 PE=2 SV=1	3	2	-0.352338	0.0126705	0.136635	DKO_1 - WT	no hit
Snrpa	Q62189	U1 small nuclear ribonucleoprotein A OS=Mus musculus GN=Snrpa PE=1 SV=3	3	2	-0.352302	0.00938862	0.635879	DKO_2 - WT	no hit
Csrp1	P97315|Q4FJX4	Cysteine and glycine-rich protein 1 OS=Mus musculus GN=Csrp1 PE=1 SV=3|Csrp1 protein OS=Mus musculus GN=Csrp1 PE=1 SV=1	3	2	-0.35207	0.017191	0.163396	DKO_1 - WT	no hit
Renbp	D6RHA2|P82343|P82343-2	N-acylglucosamine 2-epimerase OS=Mus musculus GN=Renbp PE=1 SV=2|N-acylglucosamine 2-epimerase OS=Mus musculus GN=Renbp PE=1 SV=3|Isoform 2 of N-acylglucosamine 2-epimerase OS=Mus musculus GN=Renbp	3	2	-0.352013	0.0392506	0.245418	DKO_1 - WT	no hit
Swap70	Q6A028	Switch-associated protein 70 OS=Mus musculus GN=Swap70 PE=1 SV=2	3	2	-0.351102	0.030285	0.217481	DKO_1 - WT	no hit
Ppic	P30412|Q3UC73	Peptidyl-prolyl cis-trans isomerase C OS=Mus musculus GN=Ppic PE=1 SV=1|Peptidyl-prolyl cis-trans isomerase OS=Mus musculus GN=Ppic PE=1 SV=1	3	2	-0.35098	0.00655921	0.104753	(DKO_1 - WT) - (DKO_2 - WT)	no hit
Ripk1	F7D1J2|Q60855	Receptor-interacting serine/threonine-protein kinase 1 (Fragment) OS=Mus musculus GN=Ripk1 PE=1 SV=1|Receptor-interacting serine/threonine-protein kinase 1 OS=Mus musculus GN=Ripk1 PE=1 SV=1	3	2	-0.350797	0.00885491	0.116044	DKO_1 - WT	no hit
Syap1	Q9D5V6	Synapse-associated protein 1 OS=Mus musculus GN=Syap1 PE=1 SV=1	3	2	-0.350654	0.0153341	0.793034	DKO_2 - WT	no hit
Paf	Q9CQX4	PCNA-associated factor OS=Mus musculus GN=Paf PE=1 SV=1	3	2	-0.350314	0.00496334	0.0917299	(DKO_1 - WT) - (DKO_2 - WT)	no hit
Cdc42	P60766|P60766-1	Cell division control protein 42 homolog OS=Mus musculus GN=Cdc42 PE=1 SV=2|Isoform 1 of Cell division control protein 42 homolog OS=Mus musculus GN=Cdc42	3	2	-0.350176	0.00803266	0.11513	(DKO_1 - WT) - (DKO_2 - WT)	no hit
Zfp362	B1ASA5	Protein Zfp362 OS=Mus musculus GN=Zfp362 PE=1 SV=1	3	2	-0.349914	0.0113402	0.130385	DKO_1 - WT	no hit
Cdyl	Q9WTK2|Q9WTK2-2	Chromodomain Y-like protein OS=Mus musculus GN=Cdyl PE=1 SV=1|Isoform 2 of Chromodomain Y-like protein OS=Mus musculus GN=Cdyl	3	2	-0.349832	0.00993937	0.122117	DKO_1 - WT	no hit
Dnmt3a	G3UXY2|O88508	DNA (cytosine-5)-methyltransferase 3A (Fragment) OS=Mus musculus GN=Dnmt3a PE=1 SV=7|DNA (cytosine-5)-methyltransferase 3A OS=Mus musculus GN=Dnmt3a PE=1 SV=2	3	2	-0.349171	0.00807824	0.108765	DKO_1 - WT	no hit
Fkbp14	P59024|Q542Q0	Peptidyl-prolyl cis-trans isomerase FKBP14 OS=Mus musculus GN=Fkbp14 PE=1 SV=1|FK506 binding protein 14, isoform CRA_a OS=Mus musculus GN=Fkbp14 PE=1 SV=1	3	2	-0.348687	0.00587952	0.0998278	(DKO_1 - WT) - (DKO_2 - WT)	no hit
Col18a1	E9QPX1|P39061|P39061-1|P39061-2	Collagen alpha-1(XVIII) chain OS=Mus musculus GN=Col18a1 PE=1 SV=1|Collagen alpha-1(XVIII) chain OS=Mus musculus GN=Col18a1 PE=1 SV=4|Isoform 2 of Collagen alpha-1(XVIII) chain OS=Mus musculus GN=Col18a1|Isoform 3 of Collagen alpha-1(XVIII) chain OS=Mus musculus GN=Col18a1	3	2	-0.348532	0.00583503	0.0996101	(DKO_1 - WT) - (DKO_2 - WT)	no hit
BC067074	F6RXI4	Protein BC067074 (Fragment) OS=Mus musculus GN=BC067074 PE=1 SV=1	3	2	-0.348384	0.0136561	0.143489	DKO_1 - WT	no hit
Ccdc12	A0A0G2JF16|Q8R344	Coiled-coil domain-containing protein 12 (Fragment) OS=Mus musculus GN=Ccdc12 PE=1 SV=1|Coiled-coil domain-containing protein 12 OS=Mus musculus GN=Ccdc12 PE=1 SV=2	3	2	-0.348127	0.00551685	0.511254	DKO_2 - WT	no hit
Atp5e	P56382|Q545F5	ATP synthase subunit epsilon, mitochondrial OS=Mus musculus GN=Atp5e PE=1 SV=2|ATP synthase subunit epsilon, mitochondrial OS=Mus musculus GN=Atp5e PE=1 SV=1	3	2	-0.347943	0.0435628	0.265547	(DKO_1 - WT) - (DKO_2 - WT)	no hit
Inpp5a	E9QAS7|Q3TZT4|Q7TNC9	Protein Inpp5a OS=Mus musculus GN=Inpp5a PE=1 SV=1|Protein Inpp5a OS=Mus musculus GN=Inpp5a PE=1 SV=1|Inpp5a protein OS=Mus musculus GN=Inpp5a PE=1 SV=1	3	2	-0.347764	0.0116748	0.130778	DKO_1 - WT	no hit
Ears2	Q9CXJ1	Probable glutamate--tRNA ligase, mitochondrial OS=Mus musculus GN=Ears2 PE=1 SV=1	3	2	-0.347753	0.0178595	0.169496	(DKO_1 - WT) - (DKO_2 - WT)	no hit
Pip4k2c	Q91XU3	Phosphatidylinositol 5-phosphate 4-kinase type-2 gamma OS=Mus musculus GN=Pip4k2c PE=1 SV=1	3	2	-0.347745	0.0133491	0.141037	DKO_1 - WT	no hit
Tln1	P26039	Talin-1 OS=Mus musculus GN=Tln1 PE=1 SV=2	3	2	-0.347262	0.00760195	0.104934	DKO_1 - WT	no hit
Coq3	Q8BMS4	Ubiquinone biosynthesis O-methyltransferase, mitochondrial OS=Mus musculus GN=Coq3 PE=1 SV=1	3	2	-0.346946	0.0165172	0.164766	(DKO_1 - WT) - (DKO_2 - WT)	no hit
Eno3	P21550	Beta-enolase OS=Mus musculus GN=Eno3 PE=1 SV=3	3	2	-0.346774	0.00553282	0.0967423	(DKO_1 - WT) - (DKO_2 - WT)	no hit
Rpl37	Q9D823	60S ribosomal protein L37 OS=Mus musculus GN=Rpl37 PE=3 SV=3	3	2	-0.346584	0.0155057	0.793034	DKO_2 - WT	no hit
Lima1	Q9ERG0	LIM domain and actin-binding protein 1 OS=Mus musculus GN=Lima1 PE=1 SV=3	3	2	-0.346468	0.011749	0.699225	DKO_2 - WT	no hit
Antxr2	A0A0G2JE26|Q3TCL6|Q6DFX2	Anthrax toxin receptor 2 OS=Mus musculus GN=Antxr2 PE=1 SV=1|Anthrax toxin receptor 2 OS=Mus musculus GN=Antxr2 PE=1 SV=1|Anthrax toxin receptor 2 OS=Mus musculus GN=Antxr2 PE=1 SV=1	3	2	-0.345976	0.0101527	0.123054	DKO_1 - WT	no hit
Myl12a	Q6ZWQ9	MCG5400 OS=Mus musculus GN=Myl12a PE=1 SV=1	3	2	-0.345813	0.00565795	0.0983998	(DKO_1 - WT) - (DKO_2 - WT)	no hit
Abl1	P00520|P00520-2|P00520-3|P00520-4	Tyrosine-protein kinase ABL1 OS=Mus musculus GN=Abl1 PE=1 SV=3|Isoform II of Tyrosine-protein kinase ABL1 OS=Mus musculus GN=Abl1|Isoform III of Tyrosine-protein kinase ABL1 OS=Mus musculus GN=Abl1|Isoform IV of Tyrosine-protein kinase ABL1 OS=Mus musculus GN=Abl1	3	2	-0.345159	0.00637356	0.103883	(DKO_1 - WT) - (DKO_2 - WT)	no hit
Pcdhgb6	Q91XX4	MCG133388, isoform CRA_n OS=Mus musculus GN=Pcdhgb6 PE=1 SV=1	3	2	-0.345	0.0197254	0.179214	(DKO_1 - WT) - (DKO_2 - WT)	no hit
Psap	E9PZ00|J3QPG5|K3W4L3|Q3UFE8|Q61207|Q8BFQ1	Prosaposin OS=Mus musculus GN=Psap PE=1 SV=1|Prosaposin OS=Mus musculus GN=Psap PE=1 SV=1|Prosaposin OS=Mus musculus GN=Psap PE=1 SV=1|Prosaposin OS=Mus musculus GN=Psap PE=1 SV=1|Prosaposin OS=Mus musculus GN=Psap PE=1 SV=2|Prosaposin OS=Mus musculus GN=Psap PE=1 SV=1	3	2	-0.344911	0.0141593	0.146493	DKO_1 - WT	no hit
Cdh6	P97326	Cadherin-6 OS=Mus musculus GN=Cdh6 PE=1 SV=2	3	2	-0.344858	0.00854259	0.11379	DKO_1 - WT	no hit
Ptgfrn	Q9WV91	Prostaglandin F2 receptor negative regulator OS=Mus musculus GN=Ptgfrn PE=1 SV=2	3	2	-0.344453	0.00782374	0.6246	DKO_2 - WT	no hit
Ntmt1	Q8R2U4	N-terminal Xaa-Pro-Lys N-methyltransferase 1 OS=Mus musculus GN=Ntmt1 PE=1 SV=3	3	2	-0.344442	0.0308726	0.219595	DKO_1 - WT	no hit
Zdhhc21	Q9D270	Probable palmitoyltransferase ZDHHC21 OS=Mus musculus GN=Zdhhc21 PE=1 SV=2	3	2	-0.343907	0.0232168	0.192101	DKO_1 - WT	no hit
Entpd4	Q9DBT4|Q9DBT4-2	Ectonucleoside triphosphate diphosphohydrolase 4 OS=Mus musculus GN=Entpd4 PE=1 SV=1|Isoform 2 of Ectonucleoside triphosphate diphosphohydrolase 4 OS=Mus musculus GN=Entpd4	3	2	-0.343805	0.0065828	0.104753	(DKO_1 - WT) - (DKO_2 - WT)	no hit
Fstl1	Q62356	Follistatin-related protein 1 OS=Mus musculus GN=Fstl1 PE=1 SV=2	3	2	-0.343067	0.0269314	0.204465	DKO_1 - WT	no hit
Plod1	Q9R0E2	Procollagen-lysine,2-oxoglutarate 5-dioxygenase 1 OS=Mus musculus GN=Plod1 PE=1 SV=1	3	2	-0.343067	0.00556103	0.0890727	DKO_1 - WT	no hit
Dopey1	H7BWZ9	Protein dopey-1 OS=Mus musculus GN=Dopey1 PE=1 SV=1	3	2	-0.342904	0.0157349	0.161251	(DKO_1 - WT) - (DKO_2 - WT)	no hit
Zfp568	E9PYI1|Q0VGV0	Protein Zfp568 OS=Mus musculus GN=Zfp568 PE=1 SV=1|Protein Zfp568 OS=Mus musculus GN=Zfp568 PE=1 SV=1	3	2	-0.342141	0.0239351	0.193863	DKO_1 - WT	no hit
Trps1	G3UW90|Q80V18|V9GX74|V9GXA5|V9GXE9	Trichorhinophalangeal syndrome I (Human), isoform CRA_b OS=Mus musculus GN=Trps1 PE=1 SV=1|Trichorhinophalangeal syndrome I (Human), isoform CRA_a OS=Mus musculus GN=Trps1 PE=1 SV=1|Zinc finger transcription factor Trps1 OS=Mus musculus GN=Trps1 PE=1 SV=1|Zinc finger transcription factor Trps1 OS=Mus musculus GN=Trps1 PE=1 SV=1|Zinc finger transcription factor Trps1 OS=Mus musculus GN=Trps1 PE=1 …	3	2	-0.341925	0.00704197	0.101525	DKO_1 - WT	no hit
Bckdk	A0A0U1RNL7|A0A0U1RPT4|O55028|Q3UCB5	[3-methyl-2-oxobutanoate dehydrogenase [lipoamide]] kinase, mitochondrial OS=Mus musculus GN=Bckdk PE=1 SV=1|[3-methyl-2-oxobutanoate dehydrogenase [lipoamide]] kinase, mitochondrial OS=Mus musculus GN=Bckdk PE=1 SV=1|[3-methyl-2-oxobutanoate dehydrogenase [lipoamide]] kinase, mitochondrial OS=Mus musculus GN=Bckdk PE=1 SV=1|Branched chain ketoacid dehydrogenase kinase, isoform CRA_a OS=Mus muscu…	3	2	-0.341896	0.0210422	0.183469	DKO_1 - WT	no hit
Pnmal2	G3X9N3	MCG16539 OS=Mus musculus GN=Pnmal2 PE=1 SV=1	3	2	-0.341679	0.0277995	0.20824	DKO_1 - WT	no hit
Mov10	D3YVL0|D3Z3E8|E9PW39|P23249	Putative helicase MOV-10 OS=Mus musculus GN=Mov10 PE=1 SV=2|Putative helicase MOV-10 OS=Mus musculus GN=Mov10 PE=1 SV=1|Putative helicase MOV-10 OS=Mus musculus GN=Mov10 PE=1 SV=1|Putative helicase MOV-10 OS=Mus musculus GN=Mov10 PE=1 SV=2	3	2	-0.341655	0.014337	0.153981	(DKO_1 - WT) - (DKO_2 - WT)	no hit
Mcc	E9PWI3|G3UW40	Protein Mcc OS=Mus musculus GN=Mcc PE=1 SV=1|MCG4620, isoform CRA_b OS=Mus musculus GN=Mcc PE=1 SV=1	3	2	-0.341235	0.00666912	0.105519	(DKO_1 - WT) - (DKO_2 - WT)	no hit
Nfatc4	Q8K120|Q8K120-2	Nuclear factor of activated T-cells, cytoplasmic 4 OS=Mus musculus GN=Nfatc4 PE=1 SV=2|Isoform 2 of Nuclear factor of activated T-cells, cytoplasmic 4 OS=Mus musculus GN=Nfatc4	3	2	-0.341027	0.0126647	0.144101	(DKO_1 - WT) - (DKO_2 - WT)	no hit
Sgms1	Q8VCQ6	Phosphatidylcholine:ceramide cholinephosphotransferase 1 OS=Mus musculus GN=Sgms1 PE=1 SV=2	3	2	-0.341012	0.0183503	0.168883	DKO_1 - WT	no hit
Acot2	Q9QYR9	Acyl-coenzyme A thioesterase 2, mitochondrial OS=Mus musculus GN=Acot2 PE=1 SV=2	3	2	-0.340997	0.00659105	0.0980382	DKO_1 - WT	no hit
Rab33a	P97950|Q3SXA7	Ras-related protein Rab-33A OS=Mus musculus GN=Rab33a PE=2 SV=1|RAB33A, member of RAS oncogene family OS=Mus musculus GN=Rab33a PE=1 SV=1	3	2	-0.340952	0.0166868	0.165112	(DKO_1 - WT) - (DKO_2 - WT)	no hit
N4bp1	Q6A037	NEDD4-binding protein 1 OS=Mus musculus GN=N4bp1 PE=1 SV=2	3	2	-0.340929	0.0140846	0.152576	(DKO_1 - WT) - (DKO_2 - WT)	no hit
Uxs1	Q91XL3	UDP-glucuronic acid decarboxylase 1 OS=Mus musculus GN=Uxs1 PE=1 SV=1	3	2	-0.340889	0.0123836	0.135012	DKO_1 - WT	no hit
Col3a1	P08121|Q3TVI5	Collagen alpha-1(III) chain OS=Mus musculus GN=Col3a1 PE=1 SV=4|Collagen alpha-1(III) chain OS=Mus musculus GN=Col3a1 PE=1 SV=1	3	2	-0.340769	0.0367526	0.245714	(DKO_1 - WT) - (DKO_2 - WT)	no hit
Nrp2	O35375|O35375-2|O35375-3|O35375-4|O35375-5|O35375-6	Neuropilin-2 OS=Mus musculus GN=Nrp2 PE=1 SV=2|Isoform A0 of Neuropilin-2 OS=Mus musculus GN=Nrp2|Isoform A5 of Neuropilin-2 OS=Mus musculus GN=Nrp2|Isoform A17 of Neuropilin-2 OS=Mus musculus GN=Nrp2|Isoform B0 of Neuropilin-2 OS=Mus musculus GN=Nrp2|Isoform B5 of Neuropilin-2 OS=Mus musculus GN=Nrp2	3	2	-0.340079	0.0103672	0.130235	(DKO_1 - WT) - (DKO_2 - WT)	no hit
Plxdc2	Q9DC11	Plexin domain-containing protein 2 OS=Mus musculus GN=Plxdc2 PE=1 SV=1	3	2	-0.33996	0.01515	0.158258	(DKO_1 - WT) - (DKO_2 - WT)	no hit
Zyx	Q62523|Q7TQE2	Zyxin OS=Mus musculus GN=Zyx PE=1 SV=2|Zyx protein OS=Mus musculus GN=Zyx PE=1 SV=1	3	2	-0.339867	0.0091777	0.122754	(DKO_1 - WT) - (DKO_2 - WT)	no hit
Plekha6	Q7TQG1	Pleckstrin homology domain-containing family A member 6 OS=Mus musculus GN=Plekha6 PE=1 SV=1	3	2	-0.339678	0.0405879	0.259107	(DKO_1 - WT) - (DKO_2 - WT)	no hit
Sntb2	Q542S9|Q61235	Beta-2-syntrophin OS=Mus musculus GN=Sntb2 PE=1 SV=1|Beta-2-syntrophin OS=Mus musculus GN=Sntb2 PE=1 SV=2	3	2	-0.339458	0.0116613	0.130778	DKO_1 - WT	no hit
Rrp15	Q9CYX7	RRP15-like protein OS=Mus musculus GN=Rrp15 PE=1 SV=2	3	2	-0.339393	0.00694537	0.101246	DKO_1 - WT	no hit
Cpne2	A0A0R4J1D0|P59108	Copine-2 OS=Mus musculus GN=Cpne2 PE=1 SV=1|Copine-2 OS=Mus musculus GN=Cpne2 PE=1 SV=1	3	2	-0.33919	0.0101174	0.123054	DKO_1 - WT	no hit
Fam171a2	A2A699	Protein FAM171A2 OS=Mus musculus GN=Fam171a2 PE=1 SV=1	3	2	-0.339127	0.0210993	0.183576	DKO_1 - WT	no hit
Utrn	E9Q6R7	Protein Utrn OS=Mus musculus GN=Utrn PE=1 SV=1	3	2	-0.338959	0.00960259	0.126353	(DKO_1 - WT) - (DKO_2 - WT)	no hit
Trip6	B2RS30|Q9Z1Y4	Thyroid hormone receptor interactor 6 OS=Mus musculus GN=Trip6 PE=1 SV=1|Thyroid receptor-interacting protein 6 OS=Mus musculus GN=Trip6 PE=1 SV=1	3	2	-0.338556	0.0162953	0.163888	(DKO_1 - WT) - (DKO_2 - WT)	no hit
Wdr89	Q9D0R9	WD repeat-containing protein 89 OS=Mus musculus GN=Wdr89 PE=2 SV=1	3	2	-0.338174	0.022863	0.190878	DKO_1 - WT	no hit
Sfrp1	Q8C4U3	Secreted frizzled-related protein 1 OS=Mus musculus GN=Sfrp1 PE=1 SV=3	3	2	-0.337532	0.00760298	0.112862	(DKO_1 - WT) - (DKO_2 - WT)	no hit
Nrp1	P97333	Neuropilin-1 OS=Mus musculus GN=Nrp1 PE=1 SV=2	3	2	-0.337327	0.0101513	0.639601	DKO_2 - WT	no hit
Csrp2	P97314	Cysteine and glycine-rich protein 2 OS=Mus musculus GN=Csrp2 PE=1 SV=3	3	2	-0.337289	0.0109123	0.127546	DKO_1 - WT	no hit
Hecw2	Q6I6G8	E3 ubiquitin-protein ligase HECW2 OS=Mus musculus GN=Hecw2 PE=1 SV=1	3	2	-0.337265	0.00722994	0.110346	(DKO_1 - WT) - (DKO_2 - WT)	no hit
Cwc15	Q9JHS9	Spliceosome-associated protein CWC15 homolog OS=Mus musculus GN=Cwc15 PE=1 SV=1	3	2	-0.337235	0.0229838	0.191184	DKO_1 - WT	no hit
Gprc5c	I7HPW4	G protein-coupled receptor, family C, group 5, member C OS=Mus musculus GN=Gprc5c PE=1 SV=1	3	2	-0.33717	0.0185257	0.843848	DKO_2 - WT	no hit
Sgf29	Q9DA08	SAGA-associated factor 29 OS=Mus musculus GN=Sgf29 PE=2 SV=1	3	2	-0.336271	0.00862821	0.119627	(DKO_1 - WT) - (DKO_2 - WT)	no hit
Q3USZ8	Q3USZ8	Deleted in autism protein 1 homolog OS=Mus musculus PE=1 SV=2	3	2	-0.336107	0.0101366	0.123054	DKO_1 - WT	no hit
Mme	Q61391	Neprilysin OS=Mus musculus GN=Mme PE=1 SV=3	3	2	-0.33546	0.0112011	0.129753	DKO_1 - WT	no hit
Baiap2	B1AZ46|Q8BKX1|Q8BKX1-2|Q8BKX1-3|Q8BKX1-4	Brain-specific angiogenesis inhibitor 1-associated protein 2 OS=Mus musculus GN=Baiap2 PE=1 SV=1|Brain-specific angiogenesis inhibitor 1-associated protein 2 OS=Mus musculus GN=Baiap2 PE=1 SV=2|Isoform 2 of Brain-specific angiogenesis inhibitor 1-associated protein 2 OS=Mus musculus GN=Baiap2|Isoform 3 of Brain-specific angiogenesis inhibitor 1-associated protein 2 OS=Mus musculus GN=Baiap2|Isofo…	3	2	-0.335039	0.00694382	0.101246	DKO_1 - WT	no hit
Xkr4	Q5GH67	XK-related protein 4 OS=Mus musculus GN=Xkr4 PE=1 SV=1	3	2	-0.335023	0.0268024	0.210907	(DKO_1 - WT) - (DKO_2 - WT)	no hit
Fap	P97321|P97321-2|P97321-3	Prolyl endopeptidase FAP OS=Mus musculus GN=Fap PE=1 SV=1|Isoform 2 of Prolyl endopeptidase FAP OS=Mus musculus GN=Fap|Isoform 3 of Prolyl endopeptidase FAP OS=Mus musculus GN=Fap	3	2	-0.334744	0.0100767	0.128433	(DKO_1 - WT) - (DKO_2 - WT)	no hit
Slc24a4	A0A0R4J0Z4|E9PUL6|F7B0S9|Q8CGQ8|Q8CGQ8-2	Sodium/potassium/calcium exchanger 4 OS=Mus musculus GN=Slc24a4 PE=1 SV=1|Sodium/potassium/calcium exchanger 4 OS=Mus musculus GN=Slc24a4 PE=1 SV=1|Sodium/potassium/calcium exchanger 4 (Fragment) OS=Mus musculus GN=Slc24a4 PE=1 SV=1|Sodium/potassium/calcium exchanger 4 OS=Mus musculus GN=Slc24a4 PE=2 SV=2|Isoform 2 of Sodium/potassium/calcium exchanger 4 OS=Mus musculus GN=Slc24a4	3	2	-0.33444	0.012379	0.142128	(DKO_1 - WT) - (DKO_2 - WT)	no hit
Pcdhga5	Q91XY3	MCG133388, isoform CRA_w OS=Mus musculus GN=Pcdhga5 PE=2 SV=1	3	2	-0.334336	0.0239676	0.193863	DKO_1 - WT	no hit
Zadh2	Q14AZ9|Q8BGC4	Zinc binding alcohol dehydrogenase, domain containing 2 OS=Mus musculus GN=Zadh2 PE=1 SV=1|Zinc-binding alcohol dehydrogenase domain-containing protein 2 OS=Mus musculus GN=Zadh2 PE=1 SV=1	3	2	-0.334329	0.0155797	0.160676	(DKO_1 - WT) - (DKO_2 - WT)	no hit
Col1a2	Q01149|Q3TX57	Collagen alpha-2(I) chain OS=Mus musculus GN=Col1a2 PE=1 SV=2|Collagen alpha-2(I) chain OS=Mus musculus GN=Col1a2 PE=1 SV=1	3	2	-0.334245	0.0915973	0.999773	DKO_2 - WT	no hit
Wnt5a	P22725|P22725-2	Protein Wnt-5a OS=Mus musculus GN=Wnt5a PE=1 SV=2|Isoform 2 of Protein Wnt-5a OS=Mus musculus GN=Wnt5a	3	2	-0.334205	0.00716573	0.101716	DKO_1 - WT	no hit
Emilin2	Q3U1J9|Q8K482	EMILIN-2 OS=Mus musculus GN=Emilin2 PE=1 SV=1|EMILIN-2 OS=Mus musculus GN=Emilin2 PE=1 SV=1	3	2	-0.333866	0.0168039	0.161014	DKO_1 - WT	no hit
Sp3	O70494|O70494-2|O70494-3	Transcription factor Sp3 OS=Mus musculus GN=Sp3 PE=1 SV=2|Isoform 2 of Transcription factor Sp3 OS=Mus musculus GN=Sp3|Isoform 3 of Transcription factor Sp3 OS=Mus musculus GN=Sp3	3	2	-0.333666	0.0201094	0.180295	(DKO_1 - WT) - (DKO_2 - WT)	no hit
Gpx7	Q3TNK3|Q99LJ6	Glutathione peroxidase OS=Mus musculus GN=Gpx7 PE=1 SV=1|Glutathione peroxidase 7 OS=Mus musculus GN=Gpx7 PE=1 SV=1	3	2	-0.333615	0.00809829	0.108765	DKO_1 - WT	no hit
Trim71	Q1PSW8	E3 ubiquitin-protein ligase TRIM71 OS=Mus musculus GN=Trim71 PE=1 SV=1	3	2	-0.333464	0.0241451	0.193966	DKO_1 - WT	no hit
Sdc1	P18828|P18828-2	Syndecan-1 OS=Mus musculus GN=Sdc1 PE=1 SV=1|Isoform 2 of Syndecan-1 OS=Mus musculus GN=Sdc1	3	2	-0.33333	0.0069735	0.107964	(DKO_1 - WT) - (DKO_2 - WT)	no hit
Gm20390	E9PZF0	Nucleoside diphosphate kinase OS=Mus musculus GN=Gm20390 PE=3 SV=1	3	2	-0.333061	0.0235731	0.193323	DKO_1 - WT	no hit
Cald1	E9Q0M9|E9QA16|Q8VCQ8|S4R1T7	Protein Cald1 OS=Mus musculus GN=Cald1 PE=1 SV=1|Protein Cald1 OS=Mus musculus GN=Cald1 PE=1 SV=1|Caldesmon 1 OS=Mus musculus GN=Cald1 PE=1 SV=1|Protein Cald1 OS=Mus musculus GN=Cald1 PE=1 SV=1	3	2	-0.333002	0.00908875	0.122754	(DKO_1 - WT) - (DKO_2 - WT)	no hit
Rpl35	Q6ZWV7	60S ribosomal protein L35 OS=Mus musculus GN=Rpl35 PE=1 SV=1	3	2	-0.332827	0.00675828	0.584367	DKO_2 - WT	no hit
Adgra2	J3QMG7|Q91ZV8	Adhesion G protein-coupled receptor A2 OS=Mus musculus GN=Adgra2 PE=1 SV=1|Adhesion G protein-coupled receptor A2 OS=Mus musculus GN=Adgra2 PE=1 SV=2	3	2	-0.332711	0.0195777	0.17888	(DKO_1 - WT) - (DKO_2 - WT)	no hit
Pkd2	O35245|O35245-3	Polycystin-2 OS=Mus musculus GN=Pkd2 PE=1 SV=2|Isoform 3 of Polycystin-2 OS=Mus musculus GN=Pkd2	3	2	-0.332453	0.0132057	0.147192	(DKO_1 - WT) - (DKO_2 - WT)	no hit
Anxa5	P48036	Annexin A5 OS=Mus musculus GN=Anxa5 PE=1 SV=1	3	2	-0.332186	0.0122815	0.134767	DKO_1 - WT	no hit
Bcam	Q9R069	Basal cell adhesion molecule OS=Mus musculus GN=Bcam PE=1 SV=1	3	2	-0.332084	0.00736712	0.110883	(DKO_1 - WT) - (DKO_2 - WT)	no hit
Lrp6	A0A0R4J0A9|O88572	Low-density lipoprotein receptor-related protein 6 OS=Mus musculus GN=Lrp6 PE=1 SV=1|Low-density lipoprotein receptor-related protein 6 OS=Mus musculus GN=Lrp6 PE=1 SV=1	3	2	-0.331906	0.00802459	0.11513	(DKO_1 - WT) - (DKO_2 - WT)	no hit
Fkbp2	P45878|Q3TND1	Peptidyl-prolyl cis-trans isomerase FKBP2 OS=Mus musculus GN=Fkbp2 PE=1 SV=1|Peptidyl-prolyl cis-trans isomerase OS=Mus musculus GN=Fkbp2 PE=1 SV=1	3	2	-0.331498	0.0155769	0.160676	(DKO_1 - WT) - (DKO_2 - WT)	no hit
Snn	P61807|Q5M8P0	Stannin OS=Mus musculus GN=Snn PE=1 SV=1|Snn protein OS=Mus musculus GN=Snn PE=1 SV=1	3	2	-0.33142	0.0716461	0.338506	(DKO_1 - WT) - (DKO_2 - WT)	no hit
Znf830	Q8R1N0	Zinc finger protein 830 OS=Mus musculus GN=Znf830 PE=1 SV=1	3	2	-0.331369	0.00950829	0.635879	DKO_2 - WT	no hit
Tmem132c	E9QP73	Transmembrane protein 132C OS=Mus musculus GN=Tmem132c PE=1 SV=1	3	2	-0.330723	0.00781395	0.10711	DKO_1 - WT	no hit
Cyp1b1	Q64429	Cytochrome P450 1B1 OS=Mus musculus GN=Cyp1b1 PE=1 SV=3	3	2	-0.330422	0.0336199	0.952351	DKO_2 - WT	no hit
Bcat2	O35855|Q3ULU3	Branched-chain-amino-acid aminotransferase, mitochondrial OS=Mus musculus GN=Bcat2 PE=1 SV=2|Branched-chain-amino-acid aminotransferase OS=Mus musculus GN=Bcat2 PE=1 SV=1	3	2	-0.330391	0.0116369	0.130778	DKO_1 - WT	no hit
Cdon	Q32MD9	Cell adhesion molecule-related/down-regulated by oncogenes OS=Mus musculus GN=Cdon PE=1 SV=2	3	2	-0.330244	0.00881862	0.121225	(DKO_1 - WT) - (DKO_2 - WT)	no hit
Cd200	O54901|Q80VX2	OX-2 membrane glycoprotein OS=Mus musculus GN=Cd200 PE=1 SV=1|CD200 antigen OS=Mus musculus GN=Cd200 PE=1 SV=1	3	2	-0.3302	0.00893811	0.121877	(DKO_1 - WT) - (DKO_2 - WT)	no hit
Mlycd	Q99J39	Malonyl-CoA decarboxylase, mitochondrial OS=Mus musculus GN=Mlycd PE=1 SV=1	3	2	-0.32996	0.0133492	0.141037	DKO_1 - WT	no hit
Bckdk	A0A0U1RNL7|A0A0U1RPT4|O55028|Q3UCB5	[3-methyl-2-oxobutanoate dehydrogenase [lipoamide]] kinase, mitochondrial OS=Mus musculus GN=Bckdk PE=1 SV=1|[3-methyl-2-oxobutanoate dehydrogenase [lipoamide]] kinase, mitochondrial OS=Mus musculus GN=Bckdk PE=1 SV=1|[3-methyl-2-oxobutanoate dehydrogenase [lipoamide]] kinase, mitochondrial OS=Mus musculus GN=Bckdk PE=1 SV=1|Branched chain ketoacid dehydrogenase kinase, isoform CRA_a OS=Mus muscu…	3	2	-0.329823	0.0248739	0.202202	(DKO_1 - WT) - (DKO_2 - WT)	no hit
Mgst1	E9QJW0|Q53ZD4|Q91VS7	Microsomal glutathione S-transferase 1 OS=Mus musculus GN=Mgst1 PE=1 SV=1|Microsomal glutathione S-transferase 1 OS=Mus musculus GN=Mgst1 PE=1 SV=1|Microsomal glutathione S-transferase 1 OS=Mus musculus GN=Mgst1 PE=1 SV=3	3	2	-0.329666	0.0487191	0.274412	DKO_1 - WT	no hit
Crtap	Q9CYD3	Cartilage-associated protein OS=Mus musculus GN=Crtap PE=1 SV=3	3	2	-0.329653	0.00809929	0.115473	(DKO_1 - WT) - (DKO_2 - WT)	no hit
Slc44a1	A2AMH5	Choline transporter-like protein 1 OS=Mus musculus GN=Slc44a1 PE=1 SV=1	3	2	-0.329556	0.0150487	0.793034	DKO_2 - WT	no hit
Gpc6	Q3V1C9|Q8R3X6|Q9R087	Glypican 6, isoform CRA_a OS=Mus musculus GN=Gpc6 PE=1 SV=1|Glypican 6 OS=Mus musculus GN=Gpc6 PE=1 SV=1|Glypican-6 OS=Mus musculus GN=Gpc6 PE=1 SV=1	3	2	-0.329495	0.00790185	0.107386	DKO_1 - WT	no hit
Ptprg	F8VQD7|Q05909	Receptor-type tyrosine-protein phosphatase gamma OS=Mus musculus GN=Ptprg PE=1 SV=1|Receptor-type tyrosine-protein phosphatase gamma OS=Mus musculus GN=Ptprg PE=1 SV=1	3	2	-0.32948	0.01326	0.140782	DKO_1 - WT	no hit
Tcirg1	Q9JHF5	V-type proton ATPase subunit a OS=Mus musculus GN=Tcirg1 PE=1 SV=1	3	2	-0.329442	0.0102008	0.639601	DKO_2 - WT	no hit
Arpp19	E9Q4B9|E9Q827|P56212|P56212-2	cAMP-regulated phosphoprotein 19 OS=Mus musculus GN=Arpp19 PE=1 SV=1|cAMP-regulated phosphoprotein 19 OS=Mus musculus GN=Arpp19 PE=1 SV=1|cAMP-regulated phosphoprotein 19 OS=Mus musculus GN=Arpp19 PE=1 SV=2|Isoform ARPP-16 of cAMP-regulated phosphoprotein 19 OS=Mus musculus GN=Arpp19	3	2	-0.329071	0.0182832	0.168883	DKO_1 - WT	no hit
Ston1	Q8CDJ8	Stonin-1 OS=Mus musculus GN=Ston1 PE=1 SV=2	3	2	-0.329025	0.00900042	0.116583	DKO_1 - WT	no hit
Kbtbd4	Q8R179|Q8R179-2	Kelch repeat and BTB domain-containing protein 4 OS=Mus musculus GN=Kbtbd4 PE=2 SV=1|Isoform 2 of Kelch repeat and BTB domain-containing protein 4 OS=Mus musculus GN=Kbtbd4	3	2	-0.329016	0.0223741	0.190184	(DKO_1 - WT) - (DKO_2 - WT)	no hit
Actn1	A1BN54|Q7TPR4	Alpha actinin 1a OS=Mus musculus GN=Actn1 PE=1 SV=1|Alpha-actinin-1 OS=Mus musculus GN=Actn1 PE=1 SV=1	3	2	-0.328957	0.00797318	0.6246	DKO_2 - WT	no hit
Nfib	A2BG75|A2BG76|A2BG77|I7HIP8|P97863|P97863-2|P97863-3	Nuclear factor 1 OS=Mus musculus GN=Nfib PE=1 SV=1|Nuclear factor 1 OS=Mus musculus GN=Nfib PE=1 SV=1|Nuclear factor 1 OS=Mus musculus GN=Nfib PE=1 SV=1|Nuclear factor 1 OS=Mus musculus GN=Nfib PE=1 SV=1|Nuclear factor 1 B-type OS=Mus musculus GN=Nfib PE=1 SV=2|Isoform 2 of Nuclear factor 1 B-type OS=Mus musculus GN=Nfib|Isoform 3 of Nuclear factor 1 B-type OS=Mus musculus GN=Nfib	3	2	-0.3289	0.00946228	0.635879	DKO_2 - WT	no hit
Tnfrsf21	Q9EPU5	Tumor necrosis factor receptor superfamily member 21 OS=Mus musculus GN=Tnfrsf21 PE=1 SV=2	3	2	-0.328812	0.0219367	0.186949	DKO_1 - WT	no hit
Dvl2	Q60838	Segment polarity protein dishevelled homolog DVL-2 OS=Mus musculus GN=Dvl2 PE=1 SV=2	3	2	-0.328548	0.0438589	0.265651	(DKO_1 - WT) - (DKO_2 - WT)	no hit
Scd2	P13011	Acyl-CoA desaturase 2 OS=Mus musculus GN=Scd2 PE=1 SV=2	3	2	-0.328516	0.0100898	0.123032	DKO_1 - WT	no hit
Atp1a2	D3YYN7|Q3UHK5|Q6PIE5	Sodium/potassium-transporting ATPase subunit alpha OS=Mus musculus GN=Atp1a2 PE=1 SV=1|Sodium/potassium-transporting ATPase subunit alpha OS=Mus musculus GN=Atp1a2 PE=1 SV=1|Sodium/potassium-transporting ATPase subunit alpha-2 OS=Mus musculus GN=Atp1a2 PE=1 SV=1	3	2	-0.328342	0.0550287	0.291549	DKO_1 - WT	no hit
Atg9a	A0A087WP33|Q3ZAQ4	Autophagy-related protein 9A (Fragment) OS=Mus musculus GN=Atg9a PE=1 SV=1|Autophagy 9-like 1 protein OS=Mus musculus GN=Atg9a PE=1 SV=1	3	2	-0.327842	0.0200016	0.180233	(DKO_1 - WT) - (DKO_2 - WT)	no hit
Fus	P56959|Q564D0|Q8CFQ9	RNA-binding protein FUS OS=Mus musculus GN=Fus PE=1 SV=1|Fusion, derived from t(12;16) malignant liposarcoma (Human), isoform CRA_a OS=Mus musculus GN=Fus PE=1 SV=1|Fusion, derived from t(1216) malignant liposarcoma (Human) OS=Mus musculus GN=Fus PE=1 SV=1	3	2	-0.327759	0.0686851	0.974338	DKO_2 - WT	no hit
Trim8	Q99PJ2	Probable E3 ubiquitin-protein ligase TRIM8 OS=Mus musculus GN=Trim8 PE=1 SV=3	3	2	-0.32756	0.0922675	0.384893	(DKO_1 - WT) - (DKO_2 - WT)	no hit
Bmpr1a	P36895|Q53Z43	Bone morphogenetic protein receptor type-1A OS=Mus musculus GN=Bmpr1a PE=2 SV=1|Receptor protein serine/threonine kinase OS=Mus musculus GN=Bmpr1a PE=1 SV=1	3	2	-0.327038	0.00997733	0.128307	(DKO_1 - WT) - (DKO_2 - WT)	no hit
Dchs2	A0A0A6YW72	Protein Dchs2 OS=Mus musculus GN=Dchs2 PE=4 SV=1	3	2	-0.326991	0.00930877	0.118887	DKO_1 - WT	no hit
St3gal2	Q11204	CMP-N-acetylneuraminate-beta-galactosamide-alpha-2,3-sialyltransferase 2 OS=Mus musculus GN=St3gal2 PE=2 SV=2	3	2	-0.326252	0.0137479	0.149886	(DKO_1 - WT) - (DKO_2 - WT)	no hit
Idi1	P58044	Isopentenyl-diphosphate Delta-isomerase 1 OS=Mus musculus GN=Idi1 PE=1 SV=1	3	2	-0.325815	0.0222649	0.189997	(DKO_1 - WT) - (DKO_2 - WT)	no hit
Wasf2	Q8BH43	Wiskott-Aldrich syndrome protein family member 2 OS=Mus musculus GN=Wasf2 PE=1 SV=1	3	2	-0.325585	0.00779108	0.115067	(DKO_1 - WT) - (DKO_2 - WT)	no hit
Cd81	P35762	CD81 antigen OS=Mus musculus GN=Cd81 PE=1 SV=2	3	2	-0.32553	0.0116058	0.130778	DKO_1 - WT	no hit
Upf3b	Q3ULL6	Protein Upf3b OS=Mus musculus GN=Upf3b PE=1 SV=1	3	2	-0.325274	0.00997764	0.122353	DKO_1 - WT	no hit
Limch1	D3YU22|D3Z589|Q3UH68|Q3UH68-2	LIM and calponin homology domains-containing protein 1 OS=Mus musculus GN=Limch1 PE=1 SV=1|LIM and calponin homology domains-containing protein 1 OS=Mus musculus GN=Limch1 PE=1 SV=2|LIM and calponin homology domains-containing protein 1 OS=Mus musculus GN=Limch1 PE=1 SV=2|Isoform 2 of LIM and calponin homology domains-containing protein 1 OS=Mus musculus GN=Limch1	3	2	-0.325272	0.0320275	0.224277	DKO_1 - WT	no hit
Gabarapl2	P60521	Gamma-aminobutyric acid receptor-associated protein-like 2 OS=Mus musculus GN=Gabarapl2 PE=1 SV=1	3	2	-0.32526	0.0104462	0.130235	(DKO_1 - WT) - (DKO_2 - WT)	no hit
Trip4	Q9QXN3|Q9QXN3-2	Activating signal cointegrator 1 OS=Mus musculus GN=Trip4 PE=1 SV=2|Isoform 2 of Activating signal cointegrator 1 OS=Mus musculus GN=Trip4	3	2	-0.325219	0.0171264	0.163141	DKO_1 - WT	no hit
Epb41l3	Q9WV92-2|Q9WV92-3|Q9WV92-5|Q9WV92-7	Isoform 2 of Band 4.1-like protein 3 OS=Mus musculus GN=Epb41l3|Isoform 3 of Band 4.1-like protein 3 OS=Mus musculus GN=Epb41l3|Isoform 5 of Band 4.1-like protein 3 OS=Mus musculus GN=Epb41l3|Isoform 7 of Band 4.1-like protein 3 OS=Mus musculus GN=Epb41l3	3	2	-0.325191	0.0120918	0.140567	(DKO_1 - WT) - (DKO_2 - WT)	no hit
Tmem167b	Q80X45	Protein kish-B OS=Mus musculus GN=Tmem167b PE=3 SV=1	3	2	-0.325023	0.0237373	0.193448	DKO_1 - WT	no hit
Fkbp11	Q9D1M7	Peptidyl-prolyl cis-trans isomerase FKBP11 OS=Mus musculus GN=Fkbp11 PE=1 SV=1	3	2	-0.324806	0.00932443	0.635879	DKO_2 - WT	no hit
Csnk1d	Q9DC28	Casein kinase I isoform delta OS=Mus musculus GN=Csnk1d PE=1 SV=2	3	2	-0.324757	0.0138571	0.144933	DKO_1 - WT	no hit
Lmtk2	Q3TYD6	Serine/threonine-protein kinase LMTK2 OS=Mus musculus GN=Lmtk2 PE=1 SV=3	3	2	-0.324706	0.0167704	0.165112	(DKO_1 - WT) - (DKO_2 - WT)	no hit
Atl3	E9PYT3|Q91YH5	Atlastin-3 OS=Mus musculus GN=Atl3 PE=1 SV=1|Atlastin-3 OS=Mus musculus GN=Atl3 PE=1 SV=1	3	2	-0.324605	0.0145801	0.155561	(DKO_1 - WT) - (DKO_2 - WT)	no hit
Tada2a	Q8CHV6	Transcriptional adapter 2-alpha OS=Mus musculus GN=Tada2a PE=1 SV=1	3	2	-0.324514	0.0483898	0.278285	(DKO_1 - WT) - (DKO_2 - WT)	no hit
Sdc4	O35988|Q3U5S6	Syndecan-4 OS=Mus musculus GN=Sdc4 PE=1 SV=1|Syndecan OS=Mus musculus GN=Sdc4 PE=1 SV=1	3	2	-0.324325	0.00904509	0.635879	DKO_2 - WT	no hit
Pld3	O35405	Phospholipase D3 OS=Mus musculus GN=Pld3 PE=1 SV=1	3	2	-0.324286	0.00951979	0.12603	(DKO_1 - WT) - (DKO_2 - WT)	no hit
Swap70	Q6A028	Switch-associated protein 70 OS=Mus musculus GN=Swap70 PE=1 SV=2	3	2	-0.324024	0.042344	0.262287	(DKO_1 - WT) - (DKO_2 - WT)	no hit
Brcc3	P46737	Lys-63-specific deubiquitinase BRCC36 OS=Mus musculus GN=Brcc3 PE=1 SV=1	3	2	-0.323799	0.00828839	0.117139	(DKO_1 - WT) - (DKO_2 - WT)	no hit
Kif20a	P97329	Kinesin-like protein KIF20A OS=Mus musculus GN=Kif20a PE=2 SV=1	3	2	-0.323586	0.00795283	0.107704	DKO_1 - WT	no hit
Fgfr2	D3Z5M8|E9PVU6|E9PX60|E9PX67|E9PX88|E9PX90|E9PXV8|E9Q5C2|E9Q5C3|E9Q700|E9Q708|E9Q7C7|E9Q7E6|E9Q7E8|E9Q7T0|E9QK53|P21803|P21803-2	Fibroblast growth factor receptor 2 (Fragment) OS=Mus musculus GN=Fgfr2 PE=1 SV=1|Fibroblast growth factor receptor 2 (Fragment) OS=Mus musculus GN=Fgfr2 PE=1 SV=1|Fibroblast growth factor receptor 2 (Fragment) OS=Mus musculus GN=Fgfr2 PE=1 SV=1|Fibroblast growth factor receptor 2 (Fragment) OS=Mus musculus GN=Fgfr2 PE=1 SV=1|Fibroblast growth factor receptor 2 (Fragment) OS=Mus musculus GN=Fgfr2…	3	2	-0.32334	0.0104598	0.130235	(DKO_1 - WT) - (DKO_2 - WT)	no hit
Ca4	Q64444	Carbonic anhydrase 4 OS=Mus musculus GN=Ca4 PE=1 SV=1	3	2	-0.323257	0.00803949	0.6246	DKO_2 - WT	no hit
Lrp6	A0A0R4J0A9|O88572	Low-density lipoprotein receptor-related protein 6 OS=Mus musculus GN=Lrp6 PE=1 SV=1|Low-density lipoprotein receptor-related protein 6 OS=Mus musculus GN=Lrp6 PE=1 SV=1	3	2	-0.323181	0.00931008	0.118887	DKO_1 - WT	no hit
Sept9	A2A6U3|Q80UG5|Q80UG5-3	Septin-9 OS=Mus musculus GN=Sept9 PE=1 SV=1|Septin-9 OS=Mus musculus GN=Sept9 PE=1 SV=1|Isoform 3 of Septin-9 OS=Mus musculus GN=Sept9	3	2	-0.323144	0.0193041	0.178171	(DKO_1 - WT) - (DKO_2 - WT)	no hit
Uhrf1	Q8VDF2|Q8VDF2-2	E3 ubiquitin-protein ligase UHRF1 OS=Mus musculus GN=Uhrf1 PE=1 SV=2|Isoform 2 of E3 ubiquitin-protein ligase UHRF1 OS=Mus musculus GN=Uhrf1	3	2	-0.322799	0.00837246	0.111984	DKO_1 - WT	no hit
Rbmxl2	Q9DAE2	Protein Rbmxl2 OS=Mus musculus GN=Rbmxl2 PE=1 SV=1	3	2	-0.322428	0.126992	0.424637	DKO_1 - WT	no hit
Inpp5a	E9QAS7|Q3TZT4|Q7TNC9	Protein Inpp5a OS=Mus musculus GN=Inpp5a PE=1 SV=1|Protein Inpp5a OS=Mus musculus GN=Inpp5a PE=1 SV=1|Inpp5a protein OS=Mus musculus GN=Inpp5a PE=1 SV=1	3	2	-0.322406	0.0172075	0.16811	(DKO_1 - WT) - (DKO_2 - WT)	no hit
Ppp1r13b	Q62415	Apoptosis-stimulating of p53 protein 1 OS=Mus musculus GN=Ppp1r13b PE=1 SV=2	3	2	-0.322166	0.0166394	0.159911	DKO_1 - WT	no hit
Itprip	Q3TNL8|Q3TNL8-2	Inositol 1,4,5-trisphosphate receptor-interacting protein OS=Mus musculus GN=Itprip PE=1 SV=1|Isoform 2 of Inositol 1,4,5-trisphosphate receptor-interacting protein OS=Mus musculus GN=Itprip	3	2	-0.322129	0.0143875	0.154169	(DKO_1 - WT) - (DKO_2 - WT)	no hit
Npr2	B1AWI7|Q6VVW5|Q6VVW5-2	Guanylate cyclase OS=Mus musculus GN=Npr2 PE=1 SV=1|Atrial natriuretic peptide receptor 2 OS=Mus musculus GN=Npr2 PE=1 SV=2|Isoform 2 of Atrial natriuretic peptide receptor 2 OS=Mus musculus GN=Npr2	3	2	-0.322052	0.00902727	0.116583	DKO_1 - WT	no hit
Gstm2	P15626	Glutathione S-transferase Mu 2 OS=Mus musculus GN=Gstm2 PE=1 SV=2	3	2	-0.321929	0.0241672	0.200005	(DKO_1 - WT) - (DKO_2 - WT)	no hit
Bsg	K3W4Q8|P18572|P18572-2	Basigin OS=Mus musculus GN=Bsg PE=1 SV=1|Basigin OS=Mus musculus GN=Bsg PE=1 SV=2|Isoform 2 of Basigin OS=Mus musculus GN=Bsg	3	2	-0.321217	0.00899818	0.635879	DKO_2 - WT	no hit
Ptpra	Q91V35	Receptor-type tyrosine-protein phosphatase OS=Mus musculus GN=Ptpra PE=1 SV=1	3	2	-0.320954	0.0105492	0.126027	DKO_1 - WT	no hit
Ephb3	P54754	Ephrin type-B receptor 3 OS=Mus musculus GN=Ephb3 PE=1 SV=2	3	2	-0.320739	0.0271997	0.923793	DKO_2 - WT	no hit
Epb41l2	O70318	Band 4.1-like protein 2 OS=Mus musculus GN=Epb41l2 PE=1 SV=2	3	2	-0.320143	0.0104406	0.130235	(DKO_1 - WT) - (DKO_2 - WT)	no hit
Sall4	Q8BX22	Sal-like protein 4 OS=Mus musculus GN=Sall4 PE=1 SV=2	3	2	-0.320036	0.00827779	0.110946	DKO_1 - WT	no hit
Gpc4	P51655	Glypican-4 OS=Mus musculus GN=Gpc4 PE=1 SV=2	3	2	-0.319813	0.00961256	0.120148	DKO_1 - WT	no hit
Glipr2	Q9CYL5	Golgi-associated plant pathogenesis-related protein 1 OS=Mus musculus GN=Glipr2 PE=1 SV=3	3	2	-0.319781	0.0263805	0.202043	DKO_1 - WT	no hit
Mfap3|Mfap3l	A0A0R4J1C7|Q922T2|Q9D3X9|Q9D3X9-2	Microfibril-associated glycoprotein 3 OS=Mus musculus GN=Mfap3 PE=1 SV=1|Microfibril-associated glycoprotein 3 OS=Mus musculus GN=Mfap3 PE=2 SV=1|Microfibrillar-associated protein 3-like OS=Mus musculus GN=Mfap3l PE=1 SV=1|Isoform 2 of Microfibrillar-associated protein 3-like OS=Mus musculus GN=Mfap3l	3	2	-0.319678	0.0899719	0.999773	DKO_2 - WT	no hit
Fam73b	Q8BK03	Mitoguardin-2 OS=Mus musculus GN=Fam73b PE=1 SV=1	3	2	-0.319481	0.0398848	0.256934	(DKO_1 - WT) - (DKO_2 - WT)	no hit
Tnpo2	Q99LG2	Transportin-2 OS=Mus musculus GN=Tnpo2 PE=1 SV=1	3	2	-0.319412	0.0241794	0.200005	(DKO_1 - WT) - (DKO_2 - WT)	no hit
Tcf12	Q61286|Q61286-2|V9GWU2|V9GX46|V9GXC3	Transcription factor 12 OS=Mus musculus GN=Tcf12 PE=1 SV=2|Isoform ALF1A of Transcription factor 12 OS=Mus musculus GN=Tcf12|Transcription factor 12 (Fragment) OS=Mus musculus GN=Tcf12 PE=1 SV=1|Transcription factor 12 OS=Mus musculus GN=Tcf12 PE=1 SV=1|Transcription factor 12 (Fragment) OS=Mus musculus GN=Tcf12 PE=1 SV=1	3	2	-0.319278	0.0510283	0.96119	DKO_2 - WT	no hit
Lingo1	A9DA50|Q9D1T0	Leucine-rich repeat and immunoglobulin-like domain-containing nogo receptor-interacting protein 1 OS=Mus musculus GN=Lingo1 PE=1 SV=1|Leucine-rich repeat and immunoglobulin-like domain-containing nogo receptor-interacting protein 1 OS=Mus musculus GN=Lingo1 PE=1 SV=1	3	2	-0.319244	0.00846782	0.118423	(DKO_1 - WT) - (DKO_2 - WT)	no hit
Limch1	D3YU22|D3Z589|Q3UH68|Q3UH68-2	LIM and calponin homology domains-containing protein 1 OS=Mus musculus GN=Limch1 PE=1 SV=1|LIM and calponin homology domains-containing protein 1 OS=Mus musculus GN=Limch1 PE=1 SV=2|LIM and calponin homology domains-containing protein 1 OS=Mus musculus GN=Limch1 PE=1 SV=2|Isoform 2 of LIM and calponin homology domains-containing protein 1 OS=Mus musculus GN=Limch1	3	2	-0.319167	0.0347177	0.240613	(DKO_1 - WT) - (DKO_2 - WT)	no hit
Dvl2	Q60838	Segment polarity protein dishevelled homolog DVL-2 OS=Mus musculus GN=Dvl2 PE=1 SV=2	3	2	-0.319147	0.0491025	0.27483	DKO_1 - WT	no hit
Btf3l4	A2A7Z4|Q9CQH7	Transcription factor BTF3 OS=Mus musculus GN=Btf3l4 PE=1 SV=1|Transcription factor BTF3 homolog 4 OS=Mus musculus GN=Btf3l4 PE=1 SV=1	3	2	-0.318933	0.0527478	0.288026	(DKO_1 - WT) - (DKO_2 - WT)	no hit
Csnk1e	Q9JMK2	Casein kinase I isoform epsilon OS=Mus musculus GN=Csnk1e PE=1 SV=2	3	2	-0.318837	0.00878641	0.635879	DKO_2 - WT	no hit
Ccdc12	A0A0G2JF16|Q8R344	Coiled-coil domain-containing protein 12 (Fragment) OS=Mus musculus GN=Ccdc12 PE=1 SV=1|Coiled-coil domain-containing protein 12 OS=Mus musculus GN=Ccdc12 PE=1 SV=2	3	2	-0.318724	0.00915721	0.117508	DKO_1 - WT	no hit
Snn	P61807|Q5M8P0	Stannin OS=Mus musculus GN=Snn PE=1 SV=1|Snn protein OS=Mus musculus GN=Snn PE=1 SV=1	3	2	-0.318557	0.0816528	0.346136	DKO_1 - WT	no hit
Rrp36	A0A0R4J045	Ribosomal RNA-processing protein 36 homolog OS=Mus musculus GN=Rrp36 PE=1 SV=1	3	2	-0.318533	0.0138905	0.144933	DKO_1 - WT	no hit
Anxa6	F8WIT2|P14824	Annexin OS=Mus musculus GN=Anxa6 PE=1 SV=1|Annexin A6 OS=Mus musculus GN=Anxa6 PE=1 SV=3	3	2	-0.318378	0.0131475	0.146816	(DKO_1 - WT) - (DKO_2 - WT)	no hit
Polr1d	Q9D1M1	DNA-directed RNA polymerases I and III subunit RPAC2 OS=Mus musculus GN=Polr1d PE=1 SV=1	3	2	-0.318337	0.0198824	0.848534	DKO_2 - WT	no hit
Pld3	O35405	Phospholipase D3 OS=Mus musculus GN=Pld3 PE=1 SV=1	3	2	-0.317921	0.0106047	0.126226	DKO_1 - WT	no hit
Cbfb	Q08024|Q08024-4	Core-binding factor subunit beta OS=Mus musculus GN=Cbfb PE=1 SV=1|Isoform 4 of Core-binding factor subunit beta OS=Mus musculus GN=Cbfb	3	2	-0.317717	0.0159416	0.162344	(DKO_1 - WT) - (DKO_2 - WT)	no hit
Tgfbr2	Q62312|Q62312-2	TGF-beta receptor type-2 OS=Mus musculus GN=Tgfbr2 PE=1 SV=1|Isoform RII-1 of TGF-beta receptor type-2 OS=Mus musculus GN=Tgfbr2	3	2	-0.317504	0.0393686	0.96119	DKO_2 - WT	no hit
Adgrl2	A0A0G2JDK6|A0A0G2JFF5|A0A0G2JG66|A0A0G2JGM8|Q8JZZ7|Q8JZZ7-2	Adhesion G protein-coupled receptor L2 OS=Mus musculus GN=Adgrl2 PE=1 SV=1|Adhesion G protein-coupled receptor L2 OS=Mus musculus GN=Adgrl2 PE=1 SV=1|Adhesion G protein-coupled receptor L2 OS=Mus musculus GN=Adgrl2 PE=1 SV=1|Adhesion G protein-coupled receptor L2 OS=Mus musculus GN=Adgrl2 PE=1 SV=1|Adhesion G protein-coupled receptor L2 OS=Mus musculus GN=Adgrl2 PE=1 SV=3|Isoform 2 of Adhesion G …	3	2	-0.317396	0.0165302	0.159911	DKO_1 - WT	no hit
H2-Eb1|P20040	O78196|P04231|P18468|P20040	H-2 class II histocompatibility antigen, I-A beta chain OS=Mus musculus GN=H2-Eb1 PE=1 SV=1|H-2 class II histocompatibility antigen, E-S beta chain (Fragment) OS=Mus musculus GN=H2-Eb1 PE=1 SV=1|H-2 class II histocompatibility antigen, I-A beta chain OS=Mus musculus GN=H2-Eb1 PE=1 SV=1|H-2 class II histocompatibility antigen, E-Q beta chain OS=Mus musculus PE=1 SV=1	3	2	-0.316845	0.0507819	0.284305	(DKO_1 - WT) - (DKO_2 - WT)	no hit
Micu2	Q8CD10	Calcium uptake protein 2, mitochondrial OS=Mus musculus GN=Micu2 PE=1 SV=2	3	2	-0.316799	0.00927926	0.12335	(DKO_1 - WT) - (DKO_2 - WT)	no hit
Elavl2	B1AXZ4|B1AXZ5|Q3UR02|Q564D8|Q60899|Q80Y51	ELAV-like protein OS=Mus musculus GN=Elavl2 PE=1 SV=1|ELAV-like protein OS=Mus musculus GN=Elavl2 PE=1 SV=1|ELAV-like protein OS=Mus musculus GN=Elavl2 PE=1 SV=1|ELAV-like protein OS=Mus musculus GN=Elavl2 PE=1 SV=1|ELAV-like protein 2 OS=Mus musculus GN=Elavl2 PE=2 SV=1|ELAV-like protein OS=Mus musculus GN=Elavl2 PE=1 SV=1	3	2	-0.316705	0.0107846	0.131614	(DKO_1 - WT) - (DKO_2 - WT)	no hit
Tjp1	B9EHJ3	Tight junction protein ZO-1 OS=Mus musculus GN=Tjp1 PE=1 SV=1	3	2	-0.316685	0.0166108	0.159911	DKO_1 - WT	no hit
Ndfip2	F6RT43|M0QWK1|Q91ZP6	NEDD4 family-interacting protein 2 (Fragment) OS=Mus musculus GN=Ndfip2 PE=1 SV=1|NEDD4 family-interacting protein 2 OS=Mus musculus GN=Ndfip2 PE=1 SV=1|NEDD4 family-interacting protein 2 (Fragment) OS=Mus musculus GN=Ndfip2 PE=1 SV=2	3	2	-0.316586	0.024693	0.201795	(DKO_1 - WT) - (DKO_2 - WT)	no hit
Oxnad1	Q8VE38	Oxidoreductase NAD-binding domain-containing protein 1 OS=Mus musculus GN=Oxnad1 PE=1 SV=2	3	2	-0.316346	0.0225138	0.189498	DKO_1 - WT	no hit
Srp19	G5E8T3|Q9D104	Signal recognition particle 19 kDa protein OS=Mus musculus GN=Srp19 PE=1 SV=1|Signal recognition particle 19 kDa protein OS=Mus musculus GN=Srp19 PE=1 SV=1	3	2	-0.316143	0.0381213	0.25055	(DKO_1 - WT) - (DKO_2 - WT)	no hit
Etnk1	A0A0N4SV10|A0A0N4SVC4|Q9D4V0	Ethanolamine kinase 1 OS=Mus musculus GN=Etnk1 PE=1 SV=1|Ethanolamine kinase 1 OS=Mus musculus GN=Etnk1 PE=1 SV=1|Ethanolamine kinase 1 OS=Mus musculus GN=Etnk1 PE=1 SV=2	3	2	-0.315972	0.0193752	0.178171	(DKO_1 - WT) - (DKO_2 - WT)	no hit
Smurf2	A2A5Z6|A2A5Z6-2	E3 ubiquitin-protein ligase SMURF2 OS=Mus musculus GN=Smurf2 PE=1 SV=1|Isoform 2 of E3 ubiquitin-protein ligase SMURF2 OS=Mus musculus GN=Smurf2	3	2	-0.315873	0.0451308	0.263514	DKO_1 - WT	no hit
Safb	D3YXK2|S4R1M2	Scaffold attachment factor B1 OS=Mus musculus GN=Safb PE=1 SV=2|Scaffold attachment factor B1 OS=Mus musculus GN=Safb PE=1 SV=1	3	2	-0.315564	0.0259628	0.902828	DKO_2 - WT	no hit
Erbb2ip	B2RUJ2|B7ZNX6|Q80TH2|Q80TH2-1|Q80TH2-2	Erbb2ip protein OS=Mus musculus GN=Erbb2ip PE=1 SV=1|Erbb2ip protein OS=Mus musculus GN=Erbb2ip PE=1 SV=1|Protein LAP2 OS=Mus musculus GN=Erbb2ip PE=1 SV=3|Isoform 1 of Protein LAP2 OS=Mus musculus GN=Erbb2ip|Isoform 2 of Protein LAP2 OS=Mus musculus GN=Erbb2ip	3	2	-0.315351	0.0254914	0.198754	DKO_1 - WT	no hit
Pik3c2a	F8VPL2|Q61194	Phosphatidylinositol 4-phosphate 3-kinase C2 domain-containing subunit alpha OS=Mus musculus GN=Pik3c2a PE=1 SV=1|Phosphatidylinositol 4-phosphate 3-kinase C2 domain-containing subunit alpha OS=Mus musculus GN=Pik3c2a PE=1 SV=2	3	2	-0.315331	0.0326562	0.234526	(DKO_1 - WT) - (DKO_2 - WT)	no hit
Trim32	Q3TLR3|Q8CH72	E3 ubiquitin-protein ligase TRIM32 OS=Mus musculus GN=Trim32 PE=1 SV=1|E3 ubiquitin-protein ligase TRIM32 OS=Mus musculus GN=Trim32 PE=1 SV=2	3	2	-0.314912	0.0176639	0.169255	(DKO_1 - WT) - (DKO_2 - WT)	no hit
Lyar	Q08288	Cell growth-regulating nucleolar protein OS=Mus musculus GN=Lyar PE=1 SV=2	3	2	-0.314519	0.0253855	0.899868	DKO_2 - WT	no hit
Ybx3	Q9JKB3	Y-box-binding protein 3 OS=Mus musculus GN=Ybx3 PE=1 SV=2	3	2	-0.314201	0.0146058	0.148975	DKO_1 - WT	no hit
Kiaa0100	Q5SYL3	Protein KIAA0100 OS=Mus musculus GN=Kiaa0100 PE=1 SV=1	3	2	-0.314157	0.0218475	0.187303	(DKO_1 - WT) - (DKO_2 - WT)	no hit
Tspan14	Q8QZY6	Tetraspanin-14 OS=Mus musculus GN=Tspan14 PE=1 SV=1	3	2	-0.313954	0.035066	0.233067	DKO_1 - WT	no hit
Plekha6	Q7TQG1	Pleckstrin homology domain-containing family A member 6 OS=Mus musculus GN=Plekha6 PE=1 SV=1	3	2	-0.313852	0.0551008	0.291549	DKO_1 - WT	no hit
Tmod3	Q9JHJ0	Tropomodulin-3 OS=Mus musculus GN=Tmod3 PE=1 SV=1	3	2	-0.313026	0.01154	0.130778	DKO_1 - WT	no hit
Trim3	Q3TDT0|Q9R1R2	Tripartite motif-containing protein 3 OS=Mus musculus GN=Trim3 PE=1 SV=1|Tripartite motif-containing protein 3 OS=Mus musculus GN=Trim3 PE=1 SV=1	3	2	-0.31281	0.0245651	0.201205	(DKO_1 - WT) - (DKO_2 - WT)	no hit
Sv2c	A2RSH4|Q69ZS6	Sv2c protein OS=Mus musculus GN=Sv2c PE=1 SV=1|Synaptic vesicle glycoprotein 2C OS=Mus musculus GN=Sv2c PE=1 SV=2	3	2	-0.312386	0.0113299	0.130385	DKO_1 - WT	no hit
Fastkd5	A0A0R4J291|Q7TMV3	FAST kinase domain-containing protein 5, mitochondrial OS=Mus musculus GN=Fastkd5 PE=1 SV=1|FAST kinase domain-containing protein 5, mitochondrial OS=Mus musculus GN=Fastkd5 PE=2 SV=1	3	2	-0.312242	0.0389031	0.253888	(DKO_1 - WT) - (DKO_2 - WT)	no hit
Nell1	D3YWD8|Q2VWQ2	Protein kinase C-binding protein NELL1 OS=Mus musculus GN=Nell1 PE=1 SV=1|Protein kinase C-binding protein NELL1 OS=Mus musculus GN=Nell1 PE=2 SV=1	3	2	-0.312179	0.0123248	0.134767	DKO_1 - WT	no hit
Hspg2	B1B0C7|E9PZ16	Basement membrane-specific heparan sulfate proteoglycan core protein OS=Mus musculus GN=Hspg2 PE=1 SV=1|Basement membrane-specific heparan sulfate proteoglycan core protein OS=Mus musculus GN=Hspg2 PE=1 SV=1	3	2	-0.312109	0.0196849	0.848534	DKO_2 - WT	no hit
Fermt2	Q3TLE2|Q8CIB5	Fermitin family homolog 2 OS=Mus musculus GN=Fermt2 PE=1 SV=1|Fermitin family homolog 2 OS=Mus musculus GN=Fermt2 PE=1 SV=1	3	2	-0.312075	0.0113562	0.130385	DKO_1 - WT	no hit
Rab33b	O35963|Q0PD21	Ras-related protein Rab-33B OS=Mus musculus GN=Rab33b PE=1 SV=1|RAB33B, member of RAS oncogene family, isoform CRA_a OS=Mus musculus GN=Rab33b PE=1 SV=1	3	2	-0.311793	0.0191546	0.177255	(DKO_1 - WT) - (DKO_2 - WT)	no hit
Tgfbr1	Q64729|Q64729-2|Q9D5H8	TGF-beta receptor type-1 OS=Mus musculus GN=Tgfbr1 PE=1 SV=1|Isoform 2 of TGF-beta receptor type-1 OS=Mus musculus GN=Tgfbr1|Receptor protein serine/threonine kinase OS=Mus musculus GN=Tgfbr1 PE=1 SV=1	3	2	-0.311708	0.0126396	0.136635	DKO_1 - WT	no hit
Myo1c	Q9WTI7-3	Isoform 3 of Unconventional myosin-Ic OS=Mus musculus GN=Myo1c	3	2	-0.311526	0.0103564	0.124267	DKO_1 - WT	no hit
Fn1	A0A087WR50|Q3UHL6	Fibronectin OS=Mus musculus GN=Fn1 PE=1 SV=1|Fibronectin OS=Mus musculus GN=Fn1 PE=1 SV=1	3	2	-0.311508	0.0146534	0.148991	DKO_1 - WT	no hit
Sema3c	Q62181	Semaphorin-3C OS=Mus musculus GN=Sema3c PE=1 SV=2	3	2	-0.31146	0.0112339	0.134455	(DKO_1 - WT) - (DKO_2 - WT)	no hit
Uap1	A0A0R4J085|A0A0R4J1F6|Q3UHZ7|Q91YN5|Q91YN5-2|Q91YN5-3	UDP-N-acetylhexosamine pyrophosphorylase OS=Mus musculus GN=Uap1 PE=1 SV=1|UDP-N-acetylhexosamine pyrophosphorylase OS=Mus musculus GN=Uap1 PE=1 SV=1|UDP-N-acetylhexosamine pyrophosphorylase OS=Mus musculus GN=Uap1 PE=1 SV=1|UDP-N-acetylhexosamine pyrophosphorylase OS=Mus musculus GN=Uap1 PE=1 SV=1|Isoform AGX1 of UDP-N-acetylhexosamine pyrophosphorylase OS=Mus musculus GN=Uap1|Isoform 3 of UDP-N…	3	2	-0.31135	0.0270404	0.21136	(DKO_1 - WT) - (DKO_2 - WT)	no hit
Gon4l	E9Q507|K4DI71|Q9DB00	GON-4-like protein OS=Mus musculus GN=Gon4l PE=1 SV=1|GON-4-like protein OS=Mus musculus GN=Gon4l PE=1 SV=1|GON-4-like protein OS=Mus musculus GN=Gon4l PE=1 SV=3	3	2	-0.3112	0.0308384	0.228602	(DKO_1 - WT) - (DKO_2 - WT)	no hit
Snrnp70	Q62376	U1 small nuclear ribonucleoprotein 70 kDa OS=Mus musculus GN=Snrnp70 PE=1 SV=2	3	2	-0.311174	0.0340125	0.955147	DKO_2 - WT	no hit
Tagln	P37804	Transgelin OS=Mus musculus GN=Tagln PE=1 SV=3	3	2	-0.31107	0.0184326	0.843848	DKO_2 - WT	no hit
Gan	F6TZU3|Q8CA72	Gigaxonin (Fragment) OS=Mus musculus GN=Gan PE=1 SV=1|Gigaxonin OS=Mus musculus GN=Gan PE=1 SV=2	3	2	-0.310585	0.0510379	0.284436	(DKO_1 - WT) - (DKO_2 - WT)	no hit
Cnnm4	Q69ZF7	Metal transporter CNNM4 OS=Mus musculus GN=Cnnm4 PE=1 SV=2	3	2	-0.310222	0.0177935	0.169496	(DKO_1 - WT) - (DKO_2 - WT)	no hit
Pdgfc	Q8CI19	Platelet-derived growth factor C OS=Mus musculus GN=Pdgfc PE=1 SV=2	3	2	-0.310106	0.012746	0.144101	(DKO_1 - WT) - (DKO_2 - WT)	no hit
Capn6	O35646	Calpain-6 OS=Mus musculus GN=Capn6 PE=1 SV=2	3	2	-0.309928	0.160379	0.999773	DKO_2 - WT	no hit
Pdpn	Q62011	Podoplanin OS=Mus musculus GN=Pdpn PE=1 SV=2	3	2	-0.309851	0.0380265	0.96119	DKO_2 - WT	no hit
St3gal3	B1AS81	CMP-N-acetylneuraminate-beta-1,4-galactoside alpha-2,3-sialyltransferase (Fragment) OS=Mus musculus GN=St3gal3 PE=1 SV=1	3	2	-0.309691	0.104239	0.38959	DKO_1 - WT	no hit
Ap1s1	P61967	AP-1 complex subunit sigma-1A OS=Mus musculus GN=Ap1s1 PE=1 SV=1	3	2	-0.309605	0.0471165	0.274367	(DKO_1 - WT) - (DKO_2 - WT)	no hit
P4ha2	Q5SX75|Q60716|Q60716-2	Procollagen-proline, 2-oxoglutarate 4-dioxygenase (Proline 4-hydroxylase), alpha II polypeptide, isoform CRA_f OS=Mus musculus GN=P4ha2 PE=1 SV=1|Prolyl 4-hydroxylase subunit alpha-2 OS=Mus musculus GN=P4ha2 PE=1 SV=1|Isoform IIa of Prolyl 4-hydroxylase subunit alpha-2 OS=Mus musculus GN=P4ha2	3	2	-0.309346	0.0100481	0.639601	DKO_2 - WT	no hit
Acvr1	P37172	Activin receptor type-1 OS=Mus musculus GN=Acvr1 PE=2 SV=2	3	2	-0.309122	0.0228197	0.192609	(DKO_1 - WT) - (DKO_2 - WT)	no hit
Chrna4	B7ZBU7|O70174|Q53YK0	Neuronal acetylcholine receptor subunit alpha-4 OS=Mus musculus GN=Chrna4 PE=1 SV=1|Neuronal acetylcholine receptor subunit alpha-4 OS=Mus musculus GN=Chrna4 PE=1 SV=2|Neuronal acetylcholine receptor subunit alpha-4 OS=Mus musculus GN=Chrna4 PE=1 SV=1	3	2	-0.309017	0.0204149	0.181413	(DKO_1 - WT) - (DKO_2 - WT)	no hit
Oxnad1	Q8VE38	Oxidoreductase NAD-binding domain-containing protein 1 OS=Mus musculus GN=Oxnad1 PE=1 SV=2	3	2	-0.308694	0.0252058	0.203634	(DKO_1 - WT) - (DKO_2 - WT)	no hit
Gja1	P23242	Gap junction alpha-1 protein OS=Mus musculus GN=Gja1 PE=1 SV=2	3	2	-0.308491	0.019796	0.848534	DKO_2 - WT	no hit
Acp6	Q8BP40	Lysophosphatidic acid phosphatase type 6 OS=Mus musculus GN=Acp6 PE=1 SV=1	3	2	-0.308459	0.0323249	0.233938	(DKO_1 - WT) - (DKO_2 - WT)	no hit
Aldh1b1	Q9CZS1	Aldehyde dehydrogenase X, mitochondrial OS=Mus musculus GN=Aldh1b1 PE=1 SV=1	3	2	-0.308443	0.0153615	0.15237	DKO_1 - WT	no hit
Tpcn1	Q9EQJ0	Two pore calcium channel protein 1 OS=Mus musculus GN=Tpcn1 PE=1 SV=1	3	2	-0.308417	0.0740979	0.334964	DKO_1 - WT	no hit
Chaf1b	Q9D0N7	Chromatin assembly factor 1 subunit B OS=Mus musculus GN=Chaf1b PE=1 SV=1	3	2	-0.308391	0.0108581	0.127546	DKO_1 - WT	no hit
Arhgap42	B2RQE8	Rho GTPase-activating protein 42 OS=Mus musculus GN=Arhgap42 PE=1 SV=1	3	2	-0.308307	0.023797	0.193448	DKO_1 - WT	no hit
Pgm5	Q8BZF8	Phosphoglucomutase-like protein 5 OS=Mus musculus GN=Pgm5 PE=1 SV=2	3	2	-0.308229	0.0249416	0.893901	DKO_2 - WT	no hit
Fgfr1op	Q66JX5|Q66JX5-2	FGFR1 oncogene partner OS=Mus musculus GN=Fgfr1op PE=1 SV=1|Isoform 2 of FGFR1 oncogene partner OS=Mus musculus GN=Fgfr1op	3	2	-0.308184	0.0354067	0.23485	DKO_1 - WT	no hit
Pak4	Q8BTW9	Serine/threonine-protein kinase PAK 4 OS=Mus musculus GN=Pak4 PE=1 SV=1	3	2	-0.307966	0.0194694	0.178387	(DKO_1 - WT) - (DKO_2 - WT)	no hit
Mmp2	P33434|P33434-2	72 kDa type IV collagenase OS=Mus musculus GN=Mmp2 PE=1 SV=1|Isoform 2 of 72 kDa type IV collagenase OS=Mus musculus GN=Mmp2	3	2	-0.30796	0.0133106	0.148106	(DKO_1 - WT) - (DKO_2 - WT)	no hit
Nedd8	P29595|Q3UI46	NEDD8 OS=Mus musculus GN=Nedd8 PE=1 SV=2|NEDD8 OS=Mus musculus GN=Nedd8 PE=1 SV=1	3	2	-0.307951	0.0159425	0.15637	DKO_1 - WT	no hit
Csnk1e	Q9JMK2	Casein kinase I isoform epsilon OS=Mus musculus GN=Csnk1e PE=1 SV=2	3	2	-0.307855	0.0106464	0.126489	DKO_1 - WT	no hit
Lims1	A0A0R4J005|E9QP62|Q99JW4	LIM and senescent cell antigen-like domains 1, isoform CRA_a OS=Mus musculus GN=Lims1 PE=1 SV=1|LIM and senescent cell antigen-like-containing domain protein 1 OS=Mus musculus GN=Lims1 PE=1 SV=1|LIM and senescent cell antigen-like-containing domain protein 1 OS=Mus musculus GN=Lims1 PE=1 SV=3	3	2	-0.307734	0.0147244	0.149245	DKO_1 - WT	no hit
Mlycd	Q99J39	Malonyl-CoA decarboxylase, mitochondrial OS=Mus musculus GN=Mlycd PE=1 SV=1	3	2	-0.307224	0.0190893	0.177156	(DKO_1 - WT) - (DKO_2 - WT)	no hit
Tmem119	Q8R138	Transmembrane protein 119 OS=Mus musculus GN=Tmem119 PE=1 SV=1	3	2	-0.307155	0.0568227	0.962425	DKO_2 - WT	no hit
Slc9a3r1	P70441	Na(+)/H(+) exchange regulatory cofactor NHE-RF1 OS=Mus musculus GN=Slc9a3r1 PE=1 SV=3	3	2	-0.307136	0.0828425	0.365827	(DKO_1 - WT) - (DKO_2 - WT)	no hit
Cyr61	P18406|Q3TX21	Protein CYR61 OS=Mus musculus GN=Cyr61 PE=1 SV=1|Cysteine rich protein 61 OS=Mus musculus GN=Cyr61 PE=1 SV=1	3	2	-0.307112	0.0440117	0.265832	(DKO_1 - WT) - (DKO_2 - WT)	no hit
Tspan3	Q545L1|Q9QY33	Tetraspanin OS=Mus musculus GN=Tspan3 PE=1 SV=1|Tetraspanin-3 OS=Mus musculus GN=Tspan3 PE=1 SV=1	3	2	-0.307065	0.0327992	0.22659	DKO_1 - WT	no hit
Rps20	P60867|Q5BLK2	40S ribosomal protein S20 OS=Mus musculus GN=Rps20 PE=1 SV=1|40S ribosomal protein S20 OS=Mus musculus GN=Rps20 PE=1 SV=1	3	2	-0.306797	0.0529771	0.28833	(DKO_1 - WT) - (DKO_2 - WT)	no hit
Fam171a1	A2ATK9	Family with sequence similarity 171, member A1 OS=Mus musculus GN=Fam171a1 PE=1 SV=1	3	2	-0.306612	0.021436	0.185407	DKO_1 - WT	no hit
Ptcd2	Q8R3K3	Pentatricopeptide repeat-containing protein 2, mitochondrial OS=Mus musculus GN=Ptcd2 PE=1 SV=1	3	2	-0.306137	0.0116957	0.130778	DKO_1 - WT	no hit
Hint2	Q5M9J2|Q9D0S9	Histidine triad nucleotide binding protein 2 OS=Mus musculus GN=Hint2 PE=1 SV=1|Histidine triad nucleotide-binding protein 2, mitochondrial OS=Mus musculus GN=Hint2 PE=1 SV=1	3	2	-0.305831	0.010814	0.131614	(DKO_1 - WT) - (DKO_2 - WT)	no hit
Dhx33	Q80VY9	Putative ATP-dependent RNA helicase DHX33 OS=Mus musculus GN=Dhx33 PE=1 SV=1	3	2	-0.305318	0.0130395	0.146345	(DKO_1 - WT) - (DKO_2 - WT)	no hit
Piezo1	E9PUQ9	Piezo-type mechanosensitive ion channel component OS=Mus musculus GN=Piezo1 PE=1 SV=1	3	2	-0.305147	0.0111154	0.133585	(DKO_1 - WT) - (DKO_2 - WT)	no hit
Sec14l1	A8Y5H7|A8Y5H7-2|A8Y5H7-3	SEC14-like protein 1 OS=Mus musculus GN=Sec14l1 PE=1 SV=1|Isoform 2 of SEC14-like protein 1 OS=Mus musculus GN=Sec14l1|Isoform 3 of SEC14-like protein 1 OS=Mus musculus GN=Sec14l1	3	2	-0.305002	0.01112	0.133585	(DKO_1 - WT) - (DKO_2 - WT)	no hit
Fdps	Q4FJN9|Q920E5	Farnesyl pyrophosphate synthase OS=Mus musculus GN=Fdps PE=1 SV=1|Farnesyl pyrophosphate synthase OS=Mus musculus GN=Fdps PE=1 SV=1	3	2	-0.304998	0.0413497	0.260833	(DKO_1 - WT) - (DKO_2 - WT)	no hit
Cbfb	Q08024|Q08024-4	Core-binding factor subunit beta OS=Mus musculus GN=Cbfb PE=1 SV=1|Isoform 4 of Core-binding factor subunit beta OS=Mus musculus GN=Cbfb	3	2	-0.304936	0.0195059	0.174772	DKO_1 - WT	no hit
Manbal	A2BGN7	Protein MANBAL OS=Mus musculus GN=Manbal PE=1 SV=1	3	2	-0.304816	0.0125253	0.135646	DKO_1 - WT	no hit
Fap	P97321|P97321-2|P97321-3	Prolyl endopeptidase FAP OS=Mus musculus GN=Fap PE=1 SV=1|Isoform 2 of Prolyl endopeptidase FAP OS=Mus musculus GN=Fap|Isoform 3 of Prolyl endopeptidase FAP OS=Mus musculus GN=Fap	3	2	-0.30479	0.0164268	0.15988	DKO_1 - WT	no hit
Adgrg1	Q8K209	Adhesion G-protein coupled receptor G1 OS=Mus musculus GN=Adgrg1 PE=1 SV=1	3	2	-0.304774	0.0258428	0.902828	DKO_2 - WT	no hit
Pdlim7	Q3TJD7	PDZ and LIM domain protein 7 OS=Mus musculus GN=Pdlim7 PE=1 SV=1	3	2	-0.304649	0.0146434	0.15598	(DKO_1 - WT) - (DKO_2 - WT)	no hit
Eif6	O55135|Q545K4	Eukaryotic translation initiation factor 6 OS=Mus musculus GN=Eif6 PE=1 SV=2|Eukaryotic translation initiation factor 6 OS=Mus musculus GN=Eif6 PE=1 SV=1	3	2	-0.304632	0.0165932	0.159911	DKO_1 - WT	no hit
Ppie	Q9QZH3	Peptidyl-prolyl cis-trans isomerase E OS=Mus musculus GN=Ppie PE=1 SV=2	3	2	-0.304396	0.0177814	0.843848	DKO_2 - WT	no hit
Pinx1	Q9CZX5	PIN2/TERF1-interacting telomerase inhibitor 1 OS=Mus musculus GN=Pinx1 PE=1 SV=2	3	2	-0.304195	0.0266483	0.210907	(DKO_1 - WT) - (DKO_2 - WT)	no hit
Ap1s1	P61967	AP-1 complex subunit sigma-1A OS=Mus musculus GN=Ap1s1 PE=1 SV=1	3	2	-0.303734	0.0507023	0.280061	DKO_1 - WT	no hit
Adamts9	E9PUN6	Protein Adamts9 OS=Mus musculus GN=Adamts9 PE=1 SV=1	3	2	-0.303668	0.0316908	0.230727	(DKO_1 - WT) - (DKO_2 - WT)	no hit
Nme4	Q9WV84	Nucleoside diphosphate kinase, mitochondrial OS=Mus musculus GN=Nme4 PE=1 SV=1	3	2	-0.303637	0.0139075	0.144933	DKO_1 - WT	no hit
Ephb4	P54761|Q8C8K1	Ephrin type-B receptor 4 OS=Mus musculus GN=Ephb4 PE=1 SV=2|Ephrin type-B receptor 4 OS=Mus musculus GN=Ephb4 PE=1 SV=1	3	2	-0.303333	0.0128626	0.738404	DKO_2 - WT	no hit
Ap2s1	P62743|Q3UJ76	AP-2 complex subunit sigma OS=Mus musculus GN=Ap2s1 PE=1 SV=1|AP-2 complex subunit sigma OS=Mus musculus GN=Ap2s1 PE=1 SV=1	3	2	-0.302882	0.0310309	0.228602	(DKO_1 - WT) - (DKO_2 - WT)	no hit
Paip1	F6Y616	Polyadenylate-binding protein-interacting protein 1 OS=Mus musculus GN=Paip1 PE=1 SV=2	3	2	-0.302758	0.0957569	0.373527	DKO_1 - WT	no hit
Tcf25	Q8R3L2|Q8R3L2-2|Q8R3L2-3|Q8R3L2-5	Transcription factor 25 OS=Mus musculus GN=Tcf25 PE=1 SV=2|Isoform 2 of Transcription factor 25 OS=Mus musculus GN=Tcf25|Isoform 3 of Transcription factor 25 OS=Mus musculus GN=Tcf25|Isoform 5 of Transcription factor 25 OS=Mus musculus GN=Tcf25	3	2	-0.302365	0.0178006	0.169496	(DKO_1 - WT) - (DKO_2 - WT)	no hit
Mphosph6	Q9D1Q1	M-phase phosphoprotein 6 OS=Mus musculus GN=Mphosph6 PE=1 SV=1	3	2	-0.302331	0.0181285	0.168883	DKO_1 - WT	no hit
Chst14	A2AQV2|Q80V53	Carbohydrate sulfotransferase 14 OS=Mus musculus GN=Chst14 PE=1 SV=1|Carbohydrate sulfotransferase 14 OS=Mus musculus GN=Chst14 PE=2 SV=2	3	2	-0.302211	0.0253114	0.197825	DKO_1 - WT	no hit
Adgrl2	A0A0G2JDK6|A0A0G2JFF5|A0A0G2JG66|A0A0G2JGM8|Q8JZZ7|Q8JZZ7-2	Adhesion G protein-coupled receptor L2 OS=Mus musculus GN=Adgrl2 PE=1 SV=1|Adhesion G protein-coupled receptor L2 OS=Mus musculus GN=Adgrl2 PE=1 SV=1|Adhesion G protein-coupled receptor L2 OS=Mus musculus GN=Adgrl2 PE=1 SV=1|Adhesion G protein-coupled receptor L2 OS=Mus musculus GN=Adgrl2 PE=1 SV=1|Adhesion G protein-coupled receptor L2 OS=Mus musculus GN=Adgrl2 PE=1 SV=3|Isoform 2 of Adhesion G …	3	2	-0.3021	0.0210144	0.183968	(DKO_1 - WT) - (DKO_2 - WT)	no hit
Atrnl1	Q6A051	Attractin-like protein 1 OS=Mus musculus GN=Atrnl1 PE=1 SV=2	3	2	-0.301927	0.024197	0.193966	DKO_1 - WT	no hit
Dip2a	D3Z7D3|F8WI56|Q8BWT5	Disco-interacting protein 2 homolog A OS=Mus musculus GN=Dip2a PE=1 SV=1|Disco-interacting protein 2 homolog A OS=Mus musculus GN=Dip2a PE=1 SV=1|Disco-interacting protein 2 homolog A OS=Mus musculus GN=Dip2a PE=1 SV=3	3	2	-0.301864	0.0806716	0.345593	DKO_1 - WT	no hit
Lingo1	A9DA50|Q9D1T0	Leucine-rich repeat and immunoglobulin-like domain-containing nogo receptor-interacting protein 1 OS=Mus musculus GN=Lingo1 PE=1 SV=1|Leucine-rich repeat and immunoglobulin-like domain-containing nogo receptor-interacting protein 1 OS=Mus musculus GN=Lingo1 PE=1 SV=1	3	2	-0.301635	0.0115409	0.130778	DKO_1 - WT	no hit
Usp40	Q8BWR4|Q8BWR4-2|Q8BWR4-3	Ubiquitin carboxyl-terminal hydrolase 40 OS=Mus musculus GN=Usp40 PE=1 SV=2|Isoform 2 of Ubiquitin carboxyl-terminal hydrolase 40 OS=Mus musculus GN=Usp40|Isoform 3 of Ubiquitin carboxyl-terminal hydrolase 40 OS=Mus musculus GN=Usp40	3	2	-0.301568	0.0649223	0.319054	(DKO_1 - WT) - (DKO_2 - WT)	no hit
Mrpl22	Q8BU88	39S ribosomal protein L22, mitochondrial OS=Mus musculus GN=Mrpl22 PE=1 SV=1	3	2	-0.301432	0.0182848	0.168883	DKO_1 - WT	no hit
Znf593	Q9DB42	Zinc finger protein 593 OS=Mus musculus GN=Znf593 PE=1 SV=2	3	2	-0.301264	0.0193886	0.846313	DKO_2 - WT	no hit
Vwa5a	Q99KC8	von Willebrand factor A domain-containing protein 5A OS=Mus musculus GN=Vwa5a PE=1 SV=2	3	2	-0.300786	0.0133631	0.148435	(DKO_1 - WT) - (DKO_2 - WT)	no hit
Col6a1	Q04857	Collagen alpha-1(VI) chain OS=Mus musculus GN=Col6a1 PE=1 SV=1	3	2	-0.30078	0.0146746	0.156056	(DKO_1 - WT) - (DKO_2 - WT)	no hit
Usp20	Q8C6M1	Ubiquitin carboxyl-terminal hydrolase 20 OS=Mus musculus GN=Usp20 PE=1 SV=1	3	2	-0.300686	0.0283878	0.209085	DKO_1 - WT	no hit
Atf7ip	Q7TT18	Activating transcription factor 7-interacting protein 1 OS=Mus musculus GN=Atf7ip PE=1 SV=1	3	2	-0.300469	0.0417738	0.261301	(DKO_1 - WT) - (DKO_2 - WT)	no hit
Slc4a2	A0A0R4J101|A0A0R4J1K4|A0A0R4J1K9|P13808|P13808-2|P13808-3|P13808-4|P13808-5	Anion exchange protein OS=Mus musculus GN=Slc4a2 PE=1 SV=1|Anion exchange protein OS=Mus musculus GN=Slc4a2 PE=1 SV=1|Anion exchange protein OS=Mus musculus GN=Slc4a2 PE=1 SV=1|Anion exchange protein 2 OS=Mus musculus GN=Slc4a2 PE=1 SV=1|Isoform B1 of Anion exchange protein 2 OS=Mus musculus GN=Slc4a2|Isoform B2 of Anion exchange protein 2 OS=Mus musculus GN=Slc4a2|Isoform C1 of Anion exchange pr…	3	2	-0.30039	0.0205057	0.18098	DKO_1 - WT	no hit
Ca14	Q9WVT6	Carbonic anhydrase 14 OS=Mus musculus GN=Ca14 PE=1 SV=1	3	2	-0.300345	0.0134981	0.75179	DKO_2 - WT	no hit
Flrt3	Q8BGT1	Leucine-rich repeat transmembrane protein FLRT3 OS=Mus musculus GN=Flrt3 PE=1 SV=1	3	2	-0.300333	0.0238968	0.198742	(DKO_1 - WT) - (DKO_2 - WT)	no hit
Rif1	Q6PR54|Q6PR54-3	Telomere-associated protein RIF1 OS=Mus musculus GN=Rif1 PE=1 SV=2|Isoform 3 of Telomere-associated protein RIF1 OS=Mus musculus GN=Rif1	3	2	-0.300298	0.0154636	0.152991	DKO_1 - WT	no hit
Adap1	E9PY16	Protein Adap1 OS=Mus musculus GN=Adap1 PE=1 SV=1	3	2	-0.300249	0.0338643	0.23904	(DKO_1 - WT) - (DKO_2 - WT)	no hit
Pcdhga7	Q6DD96	Protein Pcdhga7 OS=Mus musculus GN=Pcdhga7 PE=2 SV=1	3	2	-0.300058	0.0158631	0.162054	(DKO_1 - WT) - (DKO_2 - WT)	no hit
Cthrc1	Q9D1D6	Collagen triple helix repeat-containing protein 1 OS=Mus musculus GN=Cthrc1 PE=2 SV=2	3	2	-0.300017	0.0378558	0.250072	(DKO_1 - WT) - (DKO_2 - WT)	no hit
Uhrf1bp1	B2KF50	Protein Uhrf1bp1 OS=Mus musculus GN=Uhrf1bp1 PE=1 SV=1	3	2	-0.300007	0.0383867	0.243463	DKO_1 - WT	no hit
Tom1	O88746|Q3UDC3	Target of Myb protein 1 OS=Mus musculus GN=Tom1 PE=1 SV=1|Target of Myb protein 1 OS=Mus musculus GN=Tom1 PE=1 SV=1	3	2	-0.299897	0.0192387	0.173336	DKO_1 - WT	no hit
Tead1	E9PZ73|E9QAK6|Q3UFP5|Q3USK5	Transcriptional enhancer factor TEF-1 OS=Mus musculus GN=Tead1 PE=1 SV=1|Transcriptional enhancer factor TEF-1 OS=Mus musculus GN=Tead1 PE=1 SV=1|TEA domain family member 1, isoform CRA_a OS=Mus musculus GN=Tead1 PE=1 SV=1|Transcriptional enhancer factor TEF-1 OS=Mus musculus GN=Tead1 PE=1 SV=1	3	2	-0.299788	0.0426199	0.96119	DKO_2 - WT	no hit
Ublcp1	Q8BGR9	Ubiquitin-like domain-containing CTD phosphatase 1 OS=Mus musculus GN=Ublcp1 PE=1 SV=1	3	2	-0.29973	0.0908186	0.382063	(DKO_1 - WT) - (DKO_2 - WT)	no hit
Snrpf	P62307|Q497K3	Small nuclear ribonucleoprotein F OS=Mus musculus GN=Snrpf PE=1 SV=1|MCG4969 OS=Mus musculus GN=Snrpf PE=1 SV=1	3	2	-0.299654	0.0147062	0.156136	(DKO_1 - WT) - (DKO_2 - WT)	no hit
Fras1	Q80T14	Extracellular matrix protein FRAS1 OS=Mus musculus GN=Fras1 PE=1 SV=2	3	2	-0.2996	0.0137249	0.149886	(DKO_1 - WT) - (DKO_2 - WT)	no hit
Itprip	Q3TNL8|Q3TNL8-2	Inositol 1,4,5-trisphosphate receptor-interacting protein OS=Mus musculus GN=Itprip PE=1 SV=1|Isoform 2 of Inositol 1,4,5-trisphosphate receptor-interacting protein OS=Mus musculus GN=Itprip	3	2	-0.299303	0.0206767	0.181747	DKO_1 - WT	no hit
Myl12a	Q6ZWQ9	MCG5400 OS=Mus musculus GN=Myl12a PE=1 SV=1	3	2	-0.299227	0.0126927	0.136635	DKO_1 - WT	no hit
Palm	Q9Z0P4|Q9Z0P4-2	Paralemmin-1 OS=Mus musculus GN=Palm PE=1 SV=1|Isoform 2 of Paralemmin-1 OS=Mus musculus GN=Palm	3	2	-0.299214	0.0284797	0.209227	DKO_1 - WT	no hit
Axl	Q00993|Q6PE80	Tyrosine-protein kinase receptor UFO OS=Mus musculus GN=Axl PE=1 SV=2|Axl protein OS=Mus musculus GN=Axl PE=1 SV=1	3	2	-0.299065	0.031596	0.942883	DKO_2 - WT	no hit
Slc12a4	F8WIJ0|Q3TWZ6|Q9JIS8	Solute carrier family 12 member 4 OS=Mus musculus GN=Slc12a4 PE=1 SV=2|Solute carrier family 12 member 4 OS=Mus musculus GN=Slc12a4 PE=1 SV=1|Solute carrier family 12 member 4 OS=Mus musculus GN=Slc12a4 PE=1 SV=2	3	2	-0.298971	0.0168269	0.165368	(DKO_1 - WT) - (DKO_2 - WT)	no hit
Vat1l	Q80TB8	Synaptic vesicle membrane protein VAT-1 homolog-like OS=Mus musculus GN=Vat1l PE=1 SV=2	3	2	-0.298909	0.043119	0.264587	(DKO_1 - WT) - (DKO_2 - WT)	no hit
Dusp9	Q7TNL7	Dual specificity phosphatase 9 OS=Mus musculus GN=Dusp9 PE=1 SV=1	3	2	-0.298808	0.0354386	0.961174	DKO_2 - WT	no hit
Adck4	E9QLB8|Q566J8	AarF domain-containing protein kinase 4 OS=Mus musculus GN=Adck4 PE=1 SV=1|AarF domain-containing protein kinase 4 OS=Mus musculus GN=Adck4 PE=1 SV=1	3	2	-0.298184	0.0323855	0.233947	(DKO_1 - WT) - (DKO_2 - WT)	no hit
Clint1	Q5SUH6|Q5SUH7	Clathrin interactor 1 OS=Mus musculus GN=Clint1 PE=1 SV=1|Clathrin interactor 1 OS=Mus musculus GN=Clint1 PE=1 SV=1	3	2	-0.298044	0.0219939	0.186949	DKO_1 - WT	no hit
Caap1	Q8VDY9	Caspase activity and apoptosis inhibitor 1 OS=Mus musculus GN=Caap1 PE=1 SV=2	3	2	-0.297862	0.0248559	0.893901	DKO_2 - WT	no hit
Mbd2	Q9Z2E1	Methyl-CpG-binding domain protein 2 OS=Mus musculus GN=Mbd2 PE=2 SV=2	3	2	-0.297811	0.0242028	0.200005	(DKO_1 - WT) - (DKO_2 - WT)	no hit
Fgfr1	J3QN85|P16092|P16092-3|P16092-6	Fibroblast growth factor receptor OS=Mus musculus GN=Fgfr1 PE=1 SV=1|Fibroblast growth factor receptor 1 OS=Mus musculus GN=Fgfr1 PE=1 SV=2|Isoform 3 of Fibroblast growth factor receptor 1 OS=Mus musculus GN=Fgfr1|Isoform 6 of Fibroblast growth factor receptor 1 OS=Mus musculus GN=Fgfr1	3	2	-0.297562	0.0290987	0.221293	(DKO_1 - WT) - (DKO_2 - WT)	no hit
Rpl22l1	Q9D7S7|Q9D7S7-2	60S ribosomal protein L22-like 1 OS=Mus musculus GN=Rpl22l1 PE=1 SV=1|Isoform 2 of 60S ribosomal protein L22-like 1 OS=Mus musculus GN=Rpl22l1	3	2	-0.297515	0.0127009	0.136635	DKO_1 - WT	no hit
Tulp3	O88413	Tubby-related protein 3 OS=Mus musculus GN=Tulp3 PE=1 SV=1	3	2	-0.297487	0.0366603	0.237341	DKO_1 - WT	no hit
Islr	Q6GU68	Immunoglobulin superfamily containing leucine-rich repeat protein OS=Mus musculus GN=Islr PE=1 SV=1	3	2	-0.297441	0.0307719	0.228546	(DKO_1 - WT) - (DKO_2 - WT)	no hit
Cbll1	A0A087WPK1|E9QM14|Q9JIY2|Q9JIY2-2|Q9JIY2-3	E3 ubiquitin-protein ligase Hakai (Fragment) OS=Mus musculus GN=Cbll1 PE=1 SV=5|E3 ubiquitin-protein ligase Hakai OS=Mus musculus GN=Cbll1 PE=1 SV=1|E3 ubiquitin-protein ligase Hakai OS=Mus musculus GN=Cbll1 PE=1 SV=1|Isoform 2 of E3 ubiquitin-protein ligase Hakai OS=Mus musculus GN=Cbll1|Isoform 3 of E3 ubiquitin-protein ligase Hakai OS=Mus musculus GN=Cbll1	3	2	-0.297286	0.0384759	0.25207	(DKO_1 - WT) - (DKO_2 - WT)	no hit
Clcc1	A2AEM2|Q99LI2	Chloride channel CLIC-like 1, isoform CRA_a OS=Mus musculus GN=Clcc1 PE=1 SV=1|Chloride channel CLIC-like protein 1 OS=Mus musculus GN=Clcc1 PE=1 SV=1	3	2	-0.297267	0.0625871	0.313472	(DKO_1 - WT) - (DKO_2 - WT)	no hit
Anxa1	P10107|Q4FJV4	Annexin A1 OS=Mus musculus GN=Anxa1 PE=1 SV=2|Annexin OS=Mus musculus GN=Anxa1 PE=1 SV=1	3	2	-0.297213	0.0135593	0.75179	DKO_2 - WT	no hit
Rasa3	Q60790	Ras GTPase-activating protein 3 OS=Mus musculus GN=Rasa3 PE=1 SV=2	3	2	-0.296854	0.0131558	0.139905	DKO_1 - WT	no hit
Aplf	Q9D842	Aprataxin and PNK-like factor OS=Mus musculus GN=Aplf PE=1 SV=2	3	2	-0.296453	0.0419037	0.254522	DKO_1 - WT	no hit
Epha1	Q60750	Ephrin type-A receptor 1 OS=Mus musculus GN=Epha1 PE=1 SV=2	3	2	-0.296134	0.0181728	0.168883	DKO_1 - WT	no hit
Pik3r3	Q3UXE9|Q64143	Phosphatidylinositol 3 kinase, regulatory subunit, polypeptide 3 (P55) OS=Mus musculus GN=Pik3r3 PE=1 SV=1|Phosphatidylinositol 3-kinase regulatory subunit gamma OS=Mus musculus GN=Pik3r3 PE=1 SV=1	3	2	-0.295774	0.202672	0.517916	DKO_1 - WT	no hit
Kirrel	Q80W68	Kin of IRRE-like protein 1 OS=Mus musculus GN=Kirrel PE=1 SV=1	3	2	-0.295622	0.0334477	0.227676	DKO_1 - WT	no hit
Met	F8VQL0|P16056	Hepatocyte growth factor receptor OS=Mus musculus GN=Met PE=1 SV=1|Hepatocyte growth factor receptor OS=Mus musculus GN=Met PE=1 SV=1	3	2	-0.29559	0.0129849	0.139431	DKO_1 - WT	no hit
Mrpl33	Q9CQP0	39S ribosomal protein L33, mitochondrial OS=Mus musculus GN=Mrpl33 PE=1 SV=1	3	2	-0.295551	0.0172172	0.833493	DKO_2 - WT	no hit
Lgals1	P16045	Galectin-1 OS=Mus musculus GN=Lgals1 PE=1 SV=3	3	2	-0.295271	0.0174479	0.168759	(DKO_1 - WT) - (DKO_2 - WT)	no hit
Lrrc58	Q3UGP9	Leucine-rich repeat-containing protein 58 OS=Mus musculus GN=Lrrc58 PE=2 SV=1	3	2	-0.295102	0.0135406	0.148626	(DKO_1 - WT) - (DKO_2 - WT)	no hit
Vangl1	F8WI52|Q80Z96	Vang-like protein 1 OS=Mus musculus GN=Vangl1 PE=1 SV=2|Vang-like protein 1 OS=Mus musculus GN=Vangl1 PE=1 SV=2	3	2	-0.29497	0.0166557	0.165112	(DKO_1 - WT) - (DKO_2 - WT)	no hit
Pepd	A2RS23|Q11136	Peptidase D OS=Mus musculus GN=Pepd PE=1 SV=1|Xaa-Pro dipeptidase OS=Mus musculus GN=Pepd PE=1 SV=3	3	2	-0.294916	0.0344177	0.239574	(DKO_1 - WT) - (DKO_2 - WT)	no hit
Aimp2	Q8R010	Aminoacyl tRNA synthase complex-interacting multifunctional protein 2 OS=Mus musculus GN=Aimp2 PE=1 SV=2	3	2	-0.29479	0.0141565	0.152686	(DKO_1 - WT) - (DKO_2 - WT)	no hit
Rexo4	A2ALB2|Q6PAQ4	RNA exonuclease 4 OS=Mus musculus GN=Rexo4 PE=1 SV=1|RNA exonuclease 4 OS=Mus musculus GN=Rexo4 PE=2 SV=2	3	2	-0.294785	0.019199	0.173218	DKO_1 - WT	no hit
Tyms	P07607|Q544L2	Thymidylate synthase OS=Mus musculus GN=Tyms PE=1 SV=1|Thymidylate synthase OS=Mus musculus GN=Tyms PE=1 SV=1	3	2	-0.294681	0.0645395	0.965486	DKO_2 - WT	no hit
Erbb2	P70424	Receptor tyrosine-protein kinase erbB-2 OS=Mus musculus GN=Erbb2 PE=1 SV=3	3	2	-0.29434	0.0303045	0.933257	DKO_2 - WT	no hit
Cntn3	Q07409	Contactin-3 OS=Mus musculus GN=Cntn3 PE=1 SV=2	3	2	-0.294222	0.0234915	0.196378	(DKO_1 - WT) - (DKO_2 - WT)	no hit
Stat2	E9QJX9|Q9QXJ2|Q9WVL2	Signal transducer and activator of transcription OS=Mus musculus GN=Stat2 PE=1 SV=2|Signal transducer and activator of transcription OS=Mus musculus GN=Stat2 PE=1 SV=1|Signal transducer and activator of transcription 2 OS=Mus musculus GN=Stat2 PE=1 SV=1	3	2	-0.293754	0.0519825	0.283551	DKO_1 - WT	no hit
Lgals9	B1AQR8|G3X9T7|O08573|O08573-2|O08573-3	Galectin OS=Mus musculus GN=Lgals9 PE=1 SV=1|Galectin OS=Mus musculus GN=Lgals9 PE=1 SV=1|Galectin-9 OS=Mus musculus GN=Lgals9 PE=1 SV=1|Isoform 2 of Galectin-9 OS=Mus musculus GN=Lgals9|Isoform 3 of Galectin-9 OS=Mus musculus GN=Lgals9	3	2	-0.293729	0.01587	0.795919	DKO_2 - WT	no hit
Znf593	Q9DB42	Zinc finger protein 593 OS=Mus musculus GN=Znf593 PE=1 SV=2	3	2	-0.293473	0.0219634	0.186949	DKO_1 - WT	no hit
P3h1	A6PW84|Q3V1T4	Prolyl 3-hydroxylase 1 OS=Mus musculus GN=P3h1 PE=1 SV=1|Prolyl 3-hydroxylase 1 OS=Mus musculus GN=P3h1 PE=1 SV=2	3	2	-0.293114	0.013458	0.148626	(DKO_1 - WT) - (DKO_2 - WT)	no hit
Sparc	P07214|Q5NCU4|Q5NCU5	SPARC OS=Mus musculus GN=Sparc PE=1 SV=1|SPARC OS=Mus musculus GN=Sparc PE=1 SV=1|SPARC OS=Mus musculus GN=Sparc PE=1 SV=1	3	2	-0.293049	0.104756	0.999773	DKO_2 - WT	no hit
Tcf12	Q61286|Q61286-2|V9GWU2|V9GX46|V9GXC3	Transcription factor 12 OS=Mus musculus GN=Tcf12 PE=1 SV=2|Isoform ALF1A of Transcription factor 12 OS=Mus musculus GN=Tcf12|Transcription factor 12 (Fragment) OS=Mus musculus GN=Tcf12 PE=1 SV=1|Transcription factor 12 OS=Mus musculus GN=Tcf12 PE=1 SV=1|Transcription factor 12 (Fragment) OS=Mus musculus GN=Tcf12 PE=1 SV=1	3	2	-0.292835	0.0696424	0.325718	DKO_1 - WT	no hit
Tfcp2	Q9ERA0|Q9ERA0-2|Q9ERA0-3	Alpha-globin transcription factor CP2 OS=Mus musculus GN=Tfcp2 PE=1 SV=1|Isoform 2 of Alpha-globin transcription factor CP2 OS=Mus musculus GN=Tfcp2|Isoform 3 of Alpha-globin transcription factor CP2 OS=Mus musculus GN=Tfcp2	3	2	-0.292812	0.0295007	0.222783	(DKO_1 - WT) - (DKO_2 - WT)	no hit
Pcdhga5	Q91XY3	MCG133388, isoform CRA_w OS=Mus musculus GN=Pcdhga5 PE=2 SV=1	3	2	-0.292812	0.0423734	0.262287	(DKO_1 - WT) - (DKO_2 - WT)	no hit
Tub	P50586|P50586-2	Tubby protein OS=Mus musculus GN=Tub PE=1 SV=1|Isoform Short of Tubby protein OS=Mus musculus GN=Tub	3	2	-0.292505	0.0141774	0.152686	(DKO_1 - WT) - (DKO_2 - WT)	no hit
Stk3	Q9JI10	Serine/threonine-protein kinase 3 OS=Mus musculus GN=Stk3 PE=1 SV=1	3	2	-0.292384	0.0143513	0.147539	DKO_1 - WT	no hit
Nsg1	A0A0J9YTZ4|Q62092	Neuron-specific protein family member 1 OS=Mus musculus GN=Nsg1 PE=1 SV=1|Neuron-specific protein family member 1 OS=Mus musculus GN=Nsg1 PE=1 SV=3	3	2	-0.292355	0.100491	0.400002	(DKO_1 - WT) - (DKO_2 - WT)	no hit
Palm3	A2TJV2	Paralemmin-3 OS=Mus musculus GN=Palm3 PE=1 SV=1	3	2	-0.292266	0.0401271	0.257427	(DKO_1 - WT) - (DKO_2 - WT)	no hit
Ccny	Q8BGU5	Cyclin-Y OS=Mus musculus GN=Ccny PE=1 SV=1	3	2	-0.292114	0.014563	0.155561	(DKO_1 - WT) - (DKO_2 - WT)	no hit
Gna12	P27600	Guanine nucleotide-binding protein subunit alpha-12 OS=Mus musculus GN=Gna12 PE=1 SV=3	3	2	-0.291993	0.0220677	0.864468	DKO_2 - WT	no hit
Snap23	A2AKH4|O09044|Q9D3L3	Synaptosomal-associated protein OS=Mus musculus GN=Snap23 PE=1 SV=1|Synaptosomal-associated protein 23 OS=Mus musculus GN=Snap23 PE=1 SV=1|Synaptosomal-associated protein OS=Mus musculus GN=Snap23 PE=1 SV=1	3	2	-0.291953	0.0214156	0.18551	(DKO_1 - WT) - (DKO_2 - WT)	no hit
Slc2a1	P17809	Solute carrier family 2, facilitated glucose transporter member 1 OS=Mus musculus GN=Slc2a1 PE=1 SV=4	3	2	-0.291764	0.0796164	0.986937	DKO_2 - WT	no hit
Bag2	Q91YN9	BAG family molecular chaperone regulator 2 OS=Mus musculus GN=Bag2 PE=1 SV=1	3	2	-0.291728	0.0139795	0.145096	DKO_1 - WT	no hit
Tbrg4	Q91YM4|Q91YM4-2	Protein TBRG4 OS=Mus musculus GN=Tbrg4 PE=1 SV=1|Isoform 2 of Protein TBRG4 OS=Mus musculus GN=Tbrg4	3	2	-0.291686	0.0151464	0.15114	DKO_1 - WT	no hit
Itm2b	O89051	Integral membrane protein 2B OS=Mus musculus GN=Itm2b PE=1 SV=1	3	2	-0.291185	0.0515774	0.96119	DKO_2 - WT	no hit
Kyat3	Q71RI9|Q71RI9-2	Kynurenine--oxoglutarate transaminase 3 OS=Mus musculus GN=Kyat3 PE=1 SV=1|Isoform 2 of Kynurenine--oxoglutarate transaminase 3 OS=Mus musculus GN=Kyat3	3	2	-0.291111	0.0151735	0.15114	DKO_1 - WT	no hit
Btbd9	Q8C726	BTB/POZ domain-containing protein 9 OS=Mus musculus GN=Btbd9 PE=2 SV=1	3	2	-0.291018	0.0583361	0.297349	DKO_1 - WT	no hit
Zdhhc5	Q8VDZ4|Q8VDZ4-2	Palmitoyltransferase ZDHHC5 OS=Mus musculus GN=Zdhhc5 PE=1 SV=1|Isoform 2 of Palmitoyltransferase ZDHHC5 OS=Mus musculus GN=Zdhhc5	3	2	-0.290908	0.0376163	0.248997	(DKO_1 - WT) - (DKO_2 - WT)	no hit
Ngrn	Q99KS2	Neugrin OS=Mus musculus GN=Ngrn PE=2 SV=3	3	2	-0.29073	0.0382954	0.243463	DKO_1 - WT	no hit
Htra1	Q9R118	Serine protease HTRA1 OS=Mus musculus GN=Htra1 PE=1 SV=2	3	2	-0.290603	0.022151	0.187834	DKO_1 - WT	no hit
Tln1	P26039	Talin-1 OS=Mus musculus GN=Tln1 PE=1 SV=2	3	2	-0.290476	0.0194231	0.178215	(DKO_1 - WT) - (DKO_2 - WT)	no hit
Hmgb3	O54879|Q544R9	High mobility group protein B3 OS=Mus musculus GN=Hmgb3 PE=1 SV=3|High mobility group box 3 OS=Mus musculus GN=Hmgb3 PE=1 SV=1	3	2	-0.290412	0.057457	0.302045	(DKO_1 - WT) - (DKO_2 - WT)	no hit
Stx18	Q8VDS8|Q8VDS8-3	Syntaxin-18 OS=Mus musculus GN=Stx18 PE=1 SV=2|Isoform 3 of Syntaxin-18 OS=Mus musculus GN=Stx18	3	2	-0.290387	0.026152	0.202014	DKO_1 - WT	no hit
Grhpr	Q3T9Z2|Q91Z53	Glyoxylate reductase/hydroxypyruvate reductase OS=Mus musculus GN=Grhpr PE=1 SV=1|Glyoxylate reductase/hydroxypyruvate reductase OS=Mus musculus GN=Grhpr PE=1 SV=1	3	2	-0.290293	0.0411071	0.260412	(DKO_1 - WT) - (DKO_2 - WT)	no hit
Slc44a2	Q8BY89|Q8BY89-2	Choline transporter-like protein 2 OS=Mus musculus GN=Slc44a2 PE=1 SV=2|Isoform 2 of Choline transporter-like protein 2 OS=Mus musculus GN=Slc44a2	3	2	-0.290225	0.0233919	0.192813	DKO_1 - WT	no hit
Srek1ip1	Q4V9W2	Protein SREK1IP1 OS=Mus musculus GN=Srek1ip1 PE=1 SV=1	3	2	-0.29013	0.0517946	0.96119	DKO_2 - WT	no hit
Hmbox1	H3BJ31|H3BK13|H3BK67|H3BKF8|H3BKM3|H3BL55|Q8BJA3|Q8BJA3-2|Q8BJA3-3|Q8BJA3-4	Homeobox-containing protein 1 (Fragment) OS=Mus musculus GN=Hmbox1 PE=1 SV=7|Homeobox-containing protein 1 OS=Mus musculus GN=Hmbox1 PE=1 SV=1|Homeobox containing 1, isoform CRA_a OS=Mus musculus GN=Hmbox1 PE=1 SV=1|Homeobox-containing protein 1 (Fragment) OS=Mus musculus GN=Hmbox1 PE=1 SV=2|Homeobox-containing protein 1 OS=Mus musculus GN=Hmbox1 PE=1 SV=1|Homeobox-containing protein 1 OS=Mus mus…	3	2	-0.290001	0.0211888	0.184252	(DKO_1 - WT) - (DKO_2 - WT)	no hit
9530068E07Rik|Kct2	A0A0A0MQD4|Q3U339|Q8K201	Protein 9530068E07Rik OS=Mus musculus GN=9530068E07Rik PE=1 SV=1|Protein 9530068E07Rik OS=Mus musculus GN=9530068E07Rik PE=1 SV=1|Keratinocyte-associated transmembrane protein 2 OS=Mus musculus GN=Kct2 PE=1 SV=2	3	2	-0.289954	0.02481	0.196032	DKO_1 - WT	no hit
Pak4	Q8BTW9	Serine/threonine-protein kinase PAK 4 OS=Mus musculus GN=Pak4 PE=1 SV=1	3	2	-0.289842	0.025848	0.20081	DKO_1 - WT	no hit
Kif20b	Q80WE4|Q80WE4-3|Q80WE4-4	Kinesin-like protein KIF20B OS=Mus musculus GN=Kif20b PE=1 SV=3|Isoform 3 of Kinesin-like protein KIF20B OS=Mus musculus GN=Kif20b|Isoform 4 of Kinesin-like protein KIF20B OS=Mus musculus GN=Kif20b	3	2	-0.289772	0.0160628	0.162812	(DKO_1 - WT) - (DKO_2 - WT)	no hit
Chtop	E9PW20|Q9CY57|Q9CY57-3	Chromatin target of PRMT1 protein OS=Mus musculus GN=Chtop PE=1 SV=1|Chromatin target of PRMT1 protein OS=Mus musculus GN=Chtop PE=1 SV=2|Isoform 3 of Chromatin target of PRMT1 protein OS=Mus musculus GN=Chtop	3	2	-0.28976	0.0186709	0.843848	DKO_2 - WT	no hit
Nsun4	Q9CZ57	5-methylcytosine rRNA methyltransferase NSUN4 OS=Mus musculus GN=Nsun4 PE=1 SV=1	3	2	-0.289566	0.0180432	0.170572	(DKO_1 - WT) - (DKO_2 - WT)	no hit
Gnb1	P62874|Q3TQ70	Guanine nucleotide-binding protein G(I)/G(S)/G(T) subunit beta-1 OS=Mus musculus GN=Gnb1 PE=1 SV=3|Beta1 subnuit of GTP-binding protein OS=Mus musculus GN=Gnb1 PE=1 SV=1	3	2	-0.289404	0.121069	0.435109	(DKO_1 - WT) - (DKO_2 - WT)	no hit
Hnrnpab	Q544Z3|Q99020	Heterogeneous nuclear ribonucleoprotein A/B OS=Mus musculus GN=Hnrnpab PE=1 SV=1|Heterogeneous nuclear ribonucleoprotein A/B OS=Mus musculus GN=Hnrnpab PE=1 SV=1	3	2	-0.289306	0.0244932	0.893901	DKO_2 - WT	no hit
Vps9d1	Q3U280|Q8C190|Q8C190-2	VPS9 domain-containing protein 1 OS=Mus musculus GN=Vps9d1 PE=1 SV=1|VPS9 domain-containing protein 1 OS=Mus musculus GN=Vps9d1 PE=1 SV=1|Isoform 2 of VPS9 domain-containing protein 1 OS=Mus musculus GN=Vps9d1	3	2	-0.288825	0.0571585	0.301453	(DKO_1 - WT) - (DKO_2 - WT)	no hit
Atrnl1	Q6A051	Attractin-like protein 1 OS=Mus musculus GN=Atrnl1 PE=1 SV=2	3	2	-0.288598	0.0296349	0.223277	(DKO_1 - WT) - (DKO_2 - WT)	no hit
Pkp4	A2AS45|Q68FH0|Q68FH0-2	Plakophilin-4 OS=Mus musculus GN=Pkp4 PE=1 SV=1|Plakophilin-4 OS=Mus musculus GN=Pkp4 PE=1 SV=1|Isoform 2 of Plakophilin-4 OS=Mus musculus GN=Pkp4	3	2	-0.288543	0.0339958	0.229708	DKO_1 - WT	no hit
Col6a1	Q04857	Collagen alpha-1(VI) chain OS=Mus musculus GN=Col6a1 PE=1 SV=1	3	2	-0.288393	0.0181022	0.843848	DKO_2 - WT	no hit
Tenm3	G3X907|Q9WTS6|Q9WTS6-2	Odd Oz/ten-m homolog 3 (Drosophila) OS=Mus musculus GN=Tenm3 PE=1 SV=1|Teneurin-3 OS=Mus musculus GN=Tenm3 PE=1 SV=1|Isoform 2 of Teneurin-3 OS=Mus musculus GN=Tenm3	3	2	-0.288039	0.0222132	0.188116	DKO_1 - WT	no hit
Ddx28	Q9CWT6	Probable ATP-dependent RNA helicase DDX28 OS=Mus musculus GN=Ddx28 PE=2 SV=2	3	2	-0.287978	0.0197347	0.176092	DKO_1 - WT	no hit
Phactr1	B1B1B8|Q2M3X8|Q2M3X8-2|Q2M3X8-3|Q2M3X8-4	Phosphatase and actin regulator OS=Mus musculus GN=Phactr1 PE=1 SV=1|Phosphatase and actin regulator 1 OS=Mus musculus GN=Phactr1 PE=1 SV=1|Isoform 2 of Phosphatase and actin regulator 1 OS=Mus musculus GN=Phactr1|Isoform 3 of Phosphatase and actin regulator 1 OS=Mus musculus GN=Phactr1|Isoform 4 of Phosphatase and actin regulator 1 OS=Mus musculus GN=Phactr1	3	2	-0.287664	0.0570989	0.301453	(DKO_1 - WT) - (DKO_2 - WT)	no hit
Epg5	Q80TA9	Ectopic P granules protein 5 homolog OS=Mus musculus GN=Epg5 PE=1 SV=2	3	2	-0.28761	0.0207144	0.183318	(DKO_1 - WT) - (DKO_2 - WT)	no hit
Stx2	Q3TJ55|Q80W45	Syntaxin-2 OS=Mus musculus GN=Stx2 PE=1 SV=1|Syntaxin 2 OS=Mus musculus GN=Stx2 PE=1 SV=1	3	2	-0.287545	0.0148812	0.150227	DKO_1 - WT	no hit
Hcfc2	G5E837	Host cell factor 2 OS=Mus musculus GN=Hcfc2 PE=1 SV=1	3	2	-0.287471	0.0433906	0.265292	(DKO_1 - WT) - (DKO_2 - WT)	no hit
Fkrp	Q8CG64	Fukutin-related protein OS=Mus musculus GN=Fkrp PE=1 SV=1	3	2	-0.287416	0.0189518	0.176385	(DKO_1 - WT) - (DKO_2 - WT)	no hit
Sgce	D3Z572|E9PX46|F6R6P2|F6WKE4|F8WGM3|O70258|O70258-2	Epsilon-sarcoglycan OS=Mus musculus GN=Sgce PE=1 SV=1|Epsilon-sarcoglycan OS=Mus musculus GN=Sgce PE=1 SV=2|Epsilon-sarcoglycan OS=Mus musculus GN=Sgce PE=1 SV=2|Epsilon-sarcoglycan OS=Mus musculus GN=Sgce PE=1 SV=2|Epsilon-sarcoglycan OS=Mus musculus GN=Sgce PE=1 SV=2|Epsilon-sarcoglycan OS=Mus musculus GN=Sgce PE=1 SV=2|Isoform 2 of Epsilon-sarcoglycan OS=Mus musculus GN=Sgce	3	2	-0.287146	0.0258723	0.206946	(DKO_1 - WT) - (DKO_2 - WT)	no hit
Arhgef40	Q3UPH7|Q3UPH7-2|Q3UPH7-3|Q3UPH7-6|S4R189	Rho guanine nucleotide exchange factor 40 OS=Mus musculus GN=Arhgef40 PE=1 SV=1|Isoform 2 of Rho guanine nucleotide exchange factor 40 OS=Mus musculus GN=Arhgef40|Isoform 3 of Rho guanine nucleotide exchange factor 40 OS=Mus musculus GN=Arhgef40|Isoform 6 of Rho guanine nucleotide exchange factor 40 OS=Mus musculus GN=Arhgef40|Rho guanine nucleotide exchange factor 40 OS=Mus musculus GN=Arhgef40 …	3	2	-0.28712	0.0164637	0.15988	DKO_1 - WT	no hit
Ptpn13	G5E8B1|Q64512	Protein tyrosine phosphatase, non-receptor type 13 OS=Mus musculus GN=Ptpn13 PE=1 SV=1|Tyrosine-protein phosphatase non-receptor type 13 OS=Mus musculus GN=Ptpn13 PE=1 SV=2	3	2	-0.287013	0.0359641	0.243273	(DKO_1 - WT) - (DKO_2 - WT)	no hit
Slc22a17	Q9D9E0|Q9D9E0-2	Solute carrier family 22 member 17 OS=Mus musculus GN=Slc22a17 PE=2 SV=2|Isoform 2 of Solute carrier family 22 member 17 OS=Mus musculus GN=Slc22a17	3	2	-0.286769	0.0333015	0.237132	(DKO_1 - WT) - (DKO_2 - WT)	no hit
Pcolce	Q3UIP2|Q61398	Procollagen C-endopeptidase enhancer 1 OS=Mus musculus GN=Pcolce PE=1 SV=1|Procollagen C-endopeptidase enhancer 1 OS=Mus musculus GN=Pcolce PE=1 SV=2	3	2	-0.286733	0.0204387	0.848717	DKO_2 - WT	no hit
Chaf1a	Q9QWF0	Chromatin assembly factor 1 subunit A OS=Mus musculus GN=Chaf1a PE=1 SV=1	3	2	-0.286657	0.0185263	0.169506	DKO_1 - WT	no hit
Camk4	P08414|Q8BGR3	Calcium/calmodulin-dependent protein kinase type IV OS=Mus musculus GN=Camk4 PE=1 SV=2|Calcium/calmodulin-dependent protein kinase IV OS=Mus musculus GN=Camk4 PE=1 SV=1	3	2	-0.28657	0.0254378	0.204854	(DKO_1 - WT) - (DKO_2 - WT)	no hit
Epha4	Q03137	Ephrin type-A receptor 4 OS=Mus musculus GN=Epha4 PE=1 SV=2	3	2	-0.286394	0.0230552	0.193981	(DKO_1 - WT) - (DKO_2 - WT)	no hit
Mfap4	Q9D1H9|Q9D1H9-2	Microfibril-associated glycoprotein 4 OS=Mus musculus GN=Mfap4 PE=1 SV=1|Isoform 2 of Microfibril-associated glycoprotein 4 OS=Mus musculus GN=Mfap4	3	2	-0.286368	0.0434055	0.259321	DKO_1 - WT	no hit
N4bp1	Q6A037	NEDD4-binding protein 1 OS=Mus musculus GN=N4bp1 PE=1 SV=2	3	2	-0.28635	0.0320495	0.224277	DKO_1 - WT	no hit
Gpkow	Q56A08	G patch domain and KOW motifs-containing protein OS=Mus musculus GN=Gpkow PE=1 SV=2	3	2	-0.286285	0.0352447	0.241395	(DKO_1 - WT) - (DKO_2 - WT)	no hit
Cdkn1b	P46414	Cyclin-dependent kinase inhibitor 1B OS=Mus musculus GN=Cdkn1b PE=1 SV=2	3	2	-0.285907	0.0393801	0.245735	DKO_1 - WT	no hit
Eno2	P17183|Q545V3	Gamma-enolase OS=Mus musculus GN=Eno2 PE=1 SV=2|Enolase 2, gamma neuronal, isoform CRA_a OS=Mus musculus GN=Eno2 PE=1 SV=1	3	2	-0.285881	0.0543471	0.292329	(DKO_1 - WT) - (DKO_2 - WT)	no hit
Rhog	P84096|Q3UDZ1	Rho-related GTP-binding protein RhoG OS=Mus musculus GN=Rhog PE=1 SV=1|Ras homolog gene family, member G OS=Mus musculus GN=Rhog PE=1 SV=1	3	2	-0.285818	0.0282577	0.924486	DKO_2 - WT	no hit
Osbpl10	S4R1M9	Oxysterol-binding protein-related protein 10 OS=Mus musculus GN=Osbpl10 PE=1 SV=1	3	2	-0.285722	0.0205865	0.182438	(DKO_1 - WT) - (DKO_2 - WT)	no hit
Tpcn1	Q9EQJ0	Two pore calcium channel protein 1 OS=Mus musculus GN=Tpcn1 PE=1 SV=1	3	2	-0.285446	0.0948402	0.999773	DKO_2 - WT	no hit
Olfm1	O88998|Q8R357	Noelin OS=Mus musculus GN=Olfm1 PE=1 SV=1|Noelin OS=Mus musculus GN=Olfm1 PE=1 SV=1	3	2	-0.285408	0.0209474	0.183629	(DKO_1 - WT) - (DKO_2 - WT)	no hit
Unc5d	Q8K1S2	Netrin receptor UNC5D OS=Mus musculus GN=Unc5d PE=1 SV=1	3	2	-0.28529	0.0329545	0.226615	DKO_1 - WT	no hit
Rybp	Q8CCI5	RING1 and YY1-binding protein OS=Mus musculus GN=Rybp PE=1 SV=1	3	2	-0.285278	0.0154629	0.793034	DKO_2 - WT	no hit
Gltscr2	Q8BK35	MCG2065, isoform CRA_c OS=Mus musculus GN=Gltscr2 PE=1 SV=1	3	2	-0.285149	0.0265458	0.202443	DKO_1 - WT	no hit
Ell	O08856	RNA polymerase II elongation factor ELL OS=Mus musculus GN=Ell PE=2 SV=2	3	2	-0.284793	0.0201718	0.179253	DKO_1 - WT	no hit
Pltp	A2A5K2|P55065|Q3UFS5	Phospholipid transfer protein OS=Mus musculus GN=Pltp PE=1 SV=1|Phospholipid transfer protein OS=Mus musculus GN=Pltp PE=1 SV=1|Phospholipid transfer protein OS=Mus musculus GN=Pltp PE=1 SV=1	3	2	-0.284711	0.0387511	0.96119	DKO_2 - WT	no hit
Fastkd2	Q922E6	FAST kinase domain-containing protein 2, mitochondrial OS=Mus musculus GN=Fastkd2 PE=2 SV=2	3	2	-0.284583	0.0157027	0.154807	DKO_1 - WT	no hit
Sptbn4	E9PX29|Q91ZE6	Protein Sptbn4 OS=Mus musculus GN=Sptbn4 PE=1 SV=1|Beta-spectrin 4 OS=Mus musculus GN=Sptbn4 PE=1 SV=1	3	2	-0.284439	0.0595837	0.307739	(DKO_1 - WT) - (DKO_2 - WT)	no hit
Pkd2	O35245|O35245-3	Polycystin-2 OS=Mus musculus GN=Pkd2 PE=1 SV=2|Isoform 3 of Polycystin-2 OS=Mus musculus GN=Pkd2	3	2	-0.284427	0.0279975	0.20895	DKO_1 - WT	no hit
Tpx2	A2APB8	Targeting protein for Xklp2 OS=Mus musculus GN=Tpx2 PE=1 SV=1	3	2	-0.283953	0.0208314	0.183356	(DKO_1 - WT) - (DKO_2 - WT)	no hit
Slc7a7	Q9Z1K8	Y+L amino acid transporter 1 OS=Mus musculus GN=Slc7a7 PE=1 SV=1	3	2	-0.283741	0.0166227	0.159911	DKO_1 - WT	no hit
Cdc42	P60766|P60766-1	Cell division control protein 42 homolog OS=Mus musculus GN=Cdc42 PE=1 SV=2|Isoform 1 of Cell division control protein 42 homolog OS=Mus musculus GN=Cdc42	3	2	-0.283728	0.0236358	0.193448	DKO_1 - WT	no hit
Atf7ip	Q7TT18	Activating transcription factor 7-interacting protein 1 OS=Mus musculus GN=Atf7ip PE=1 SV=1	3	2	-0.283676	0.0522216	0.283958	DKO_1 - WT	no hit
Ddx3y	Q62095	ATP-dependent RNA helicase DDX3Y OS=Mus musculus GN=Ddx3y PE=1 SV=2	3	2	-0.283603	0.017863	0.167729	DKO_1 - WT	no hit
Rrp36	A0A0R4J045	Ribosomal RNA-processing protein 36 homolog OS=Mus musculus GN=Rrp36 PE=1 SV=1	3	2	-0.283551	0.0244611	0.893901	DKO_2 - WT	no hit
Vamp8	A0A0R4J0R1|O70404	Vesicle-associated membrane protein 8 OS=Mus musculus GN=Vamp8 PE=1 SV=1|Vesicle-associated membrane protein 8 OS=Mus musculus GN=Vamp8 PE=1 SV=1	3	2	-0.283531	0.0209716	0.855615	DKO_2 - WT	no hit
Mob1b|Mob1a	Q3T9U1|Q3UDM0|Q8BPB0|Q921Y0	MOB kinase activator 1B OS=Mus musculus GN=Mob1b PE=1 SV=1|MOB kinase activator 1B OS=Mus musculus GN=Mob1b PE=1 SV=1|MOB kinase activator 1B OS=Mus musculus GN=Mob1b PE=1 SV=3|MOB kinase activator 1A OS=Mus musculus GN=Mob1a PE=2 SV=3	3	2	-0.283249	0.0183487	0.168883	DKO_1 - WT	no hit
Mpv17l2	Q8VIK2	Mpv17-like protein 2 OS=Mus musculus GN=Mpv17l2 PE=1 SV=1	3	2	-0.283087	0.022812	0.190697	DKO_1 - WT	no hit
Grn	H3BJE0|P28798|Q3U9N4	Granulins (Fragment) OS=Mus musculus GN=Grn PE=1 SV=1|Granulins OS=Mus musculus GN=Grn PE=1 SV=2|Granulins OS=Mus musculus GN=Grn PE=1 SV=1	3	2	-0.28303	0.0276721	0.214211	(DKO_1 - WT) - (DKO_2 - WT)	no hit
Peg3	Q3URU2	Paternally-expressed gene 3 protein OS=Mus musculus GN=Peg3 PE=1 SV=1	3	2	-0.28296	0.0202186	0.180645	(DKO_1 - WT) - (DKO_2 - WT)	no hit
Slc35a4	A0A087WQH8	Probable UDP-sugar transporter protein SLC35A4 OS=Mus musculus GN=Slc35a4 PE=1 SV=1	3	2	-0.28285	0.0231998	0.874984	DKO_2 - WT	no hit
Yipf1	A2A8S2|A2A8S3|Q91VU1	Protein YIPF (Fragment) OS=Mus musculus GN=Yipf1 PE=1 SV=7|Protein YIPF (Fragment) OS=Mus musculus GN=Yipf1 PE=1 SV=1|Protein YIPF1 OS=Mus musculus GN=Yipf1 PE=2 SV=1	3	2	-0.282839	0.122251	0.436659	(DKO_1 - WT) - (DKO_2 - WT)	no hit
Epha10	F6WVB0|Q8BYG9	Ephrin type-A receptor 10 (Fragment) OS=Mus musculus GN=Epha10 PE=1 SV=1|Ephrin type-A receptor 10 OS=Mus musculus GN=Epha10 PE=2 SV=2	3	2	-0.282685	0.0340194	0.229708	DKO_1 - WT	no hit
Slc24a4	A0A0R4J0Z4|E9PUL6|F7B0S9|Q8CGQ8|Q8CGQ8-2	Sodium/potassium/calcium exchanger 4 OS=Mus musculus GN=Slc24a4 PE=1 SV=1|Sodium/potassium/calcium exchanger 4 OS=Mus musculus GN=Slc24a4 PE=1 SV=1|Sodium/potassium/calcium exchanger 4 (Fragment) OS=Mus musculus GN=Slc24a4 PE=1 SV=1|Sodium/potassium/calcium exchanger 4 OS=Mus musculus GN=Slc24a4 PE=2 SV=2|Isoform 2 of Sodium/potassium/calcium exchanger 4 OS=Mus musculus GN=Slc24a4	3	2	-0.282626	0.0279892	0.20895	DKO_1 - WT	no hit
Rbm3	Q545K5|Q8BG13	MCG116386, isoform CRA_a OS=Mus musculus GN=Rbm3 PE=1 SV=1|RNA-binding protein 3 OS=Mus musculus GN=Rbm3 PE=1 SV=1	3	2	-0.282534	0.0403081	0.96119	DKO_2 - WT	no hit
C1galt1	Q9JJ06	Glycoprotein-N-acetylgalactosamine 3-beta-galactosyltransferase 1 OS=Mus musculus GN=C1galt1 PE=1 SV=1	3	2	-0.282514	0.0435161	0.96119	DKO_2 - WT	no hit
Cwc15	Q9JHS9	Spliceosome-associated protein CWC15 homolog OS=Mus musculus GN=Cwc15 PE=1 SV=1	3	2	-0.282482	0.0486882	0.96119	DKO_2 - WT	no hit
Slc25a24	Q8BMD8	Calcium-binding mitochondrial carrier protein SCaMC-1 OS=Mus musculus GN=Slc25a24 PE=1 SV=1	3	2	-0.28248	0.0283034	0.209085	DKO_1 - WT	no hit
Marcks	P26645	Myristoylated alanine-rich C-kinase substrate OS=Mus musculus GN=Marcks PE=1 SV=2	3	2	-0.282438	0.0228919	0.870688	DKO_2 - WT	no hit
Dab2	A0A0R4J104|E9QL31|P98078|P98078-2	Disabled homolog 2 OS=Mus musculus GN=Dab2 PE=1 SV=1|Disabled homolog 2 OS=Mus musculus GN=Dab2 PE=1 SV=1|Disabled homolog 2 OS=Mus musculus GN=Dab2 PE=1 SV=2|Isoform p93 of Disabled homolog 2 OS=Mus musculus GN=Dab2	3	2	-0.282411	0.022585	0.191388	(DKO_1 - WT) - (DKO_2 - WT)	no hit
Snrk	D3Z1F6|Q8VDU5	SNF-related serine/threonine-protein kinase (Fragment) OS=Mus musculus GN=Snrk PE=1 SV=1|SNF-related serine/threonine-protein kinase OS=Mus musculus GN=Snrk PE=1 SV=1	3	2	-0.282179	0.0193908	0.178171	(DKO_1 - WT) - (DKO_2 - WT)	no hit
Vnn1	Q9Z0K8	Pantetheinase OS=Mus musculus GN=Vnn1 PE=1 SV=3	3	2	-0.282066	0.0321163	0.224499	DKO_1 - WT	no hit
Tfb1m	Q8JZM0	Dimethyladenosine transferase 1, mitochondrial OS=Mus musculus GN=Tfb1m PE=1 SV=1	3	2	-0.282037	0.018108	0.168883	DKO_1 - WT	no hit
Nudt21	Q9CQF3	Cleavage and polyadenylation specificity factor subunit 5 OS=Mus musculus GN=Nudt21 PE=1 SV=1	3	2	-0.281991	0.0190793	0.172859	DKO_1 - WT	no hit
Lifr	P42703	Leukemia inhibitory factor receptor OS=Mus musculus GN=Lifr PE=1 SV=1	3	2	-0.281865	0.0397597	0.96119	DKO_2 - WT	no hit
Parva	Q3UF75|Q9EPC1	Alpha-parvin OS=Mus musculus GN=Parva PE=1 SV=1|Alpha-parvin OS=Mus musculus GN=Parva PE=1 SV=1	3	2	-0.281827	0.0268551	0.210907	(DKO_1 - WT) - (DKO_2 - WT)	no hit
Megf6	A0A0A0MQ83|Q80V70	Multiple epidermal growth factor-like domains protein 6 OS=Mus musculus GN=Megf6 PE=1 SV=1|Multiple epidermal growth factor-like domains protein 6 OS=Mus musculus GN=Megf6 PE=2 SV=3	3	2	-0.281678	0.0469351	0.270158	DKO_1 - WT	no hit
Siae	P70665|P70665-2	Sialate O-acetylesterase OS=Mus musculus GN=Siae PE=1 SV=3|Isoform 2 of Sialate O-acetylesterase OS=Mus musculus GN=Siae	3	2	-0.281635	0.10519	0.390328	DKO_1 - WT	no hit
Prrx1	G3UZ44|P63013|P63013-2	Paired mesoderm homeobox protein 1 OS=Mus musculus GN=Prrx1 PE=1 SV=1|Paired mesoderm homeobox protein 1 OS=Mus musculus GN=Prrx1 PE=1 SV=1|Isoform 2 of Paired mesoderm homeobox protein 1 OS=Mus musculus GN=Prrx1	3	2	-0.281568	0.0520344	0.96119	DKO_2 - WT	no hit
Npnt	D3Z4D3|Q91V88|Q91V88-2	Nephronectin OS=Mus musculus GN=Npnt PE=1 SV=1|Nephronectin OS=Mus musculus GN=Npnt PE=1 SV=1|Isoform 2 of Nephronectin OS=Mus musculus GN=Npnt	3	2	-0.281477	0.0425617	0.2627	(DKO_1 - WT) - (DKO_2 - WT)	no hit
Psap	E9PZ00|J3QPG5|K3W4L3|Q3UFE8|Q61207|Q8BFQ1	Prosaposin OS=Mus musculus GN=Psap PE=1 SV=1|Prosaposin OS=Mus musculus GN=Psap PE=1 SV=1|Prosaposin OS=Mus musculus GN=Psap PE=1 SV=1|Prosaposin OS=Mus musculus GN=Psap PE=1 SV=1|Prosaposin OS=Mus musculus GN=Psap PE=1 SV=2|Prosaposin OS=Mus musculus GN=Psap PE=1 SV=1	3	2	-0.28143	0.036383	0.244419	(DKO_1 - WT) - (DKO_2 - WT)	no hit
Jak1	B1ASP2|P52332	Tyrosine-protein kinase OS=Mus musculus GN=Jak1 PE=1 SV=1|Tyrosine-protein kinase JAK1 OS=Mus musculus GN=Jak1 PE=1 SV=1	3	2	-0.281351	0.0190254	0.172827	DKO_1 - WT	no hit
Ptprz1	B2RXS8|B9EKR1	Ptprz1 protein OS=Mus musculus GN=Ptprz1 PE=1 SV=1|Receptor-type tyrosine-protein phosphatase zeta OS=Mus musculus GN=Ptprz1 PE=1 SV=1	3	2	-0.281312	0.0172536	0.168307	(DKO_1 - WT) - (DKO_2 - WT)	no hit
Tnc	Q80YX1|Q80YX1-2|Q80YX1-3|Q80YX1-4|Q80YX1-5	Tenascin OS=Mus musculus GN=Tnc PE=1 SV=1|Isoform 2 of Tenascin OS=Mus musculus GN=Tnc|Isoform 3 of Tenascin OS=Mus musculus GN=Tnc|Isoform 4 of Tenascin OS=Mus musculus GN=Tnc|Isoform 5 of Tenascin OS=Mus musculus GN=Tnc	3	2	-0.281116	0.0329685	0.226615	DKO_1 - WT	no hit
Cr1l	Q64735|Q64735-2	Complement component receptor 1-like protein OS=Mus musculus GN=Cr1l PE=1 SV=1|Isoform 2 of Complement component receptor 1-like protein OS=Mus musculus GN=Cr1l	3	2	-0.281061	0.019439	0.846313	DKO_2 - WT	no hit
Fkbp9	Q9Z247	Peptidyl-prolyl cis-trans isomerase FKBP9 OS=Mus musculus GN=Fkbp9 PE=1 SV=1	3	2	-0.280949	0.0203918	0.181413	(DKO_1 - WT) - (DKO_2 - WT)	no hit
Cd200	O54901|Q80VX2	OX-2 membrane glycoprotein OS=Mus musculus GN=Cd200 PE=1 SV=1|CD200 antigen OS=Mus musculus GN=Cd200 PE=1 SV=1	3	2	-0.280481	0.0207149	0.181837	DKO_1 - WT	no hit
Uhrf1	Q8VDF2|Q8VDF2-2	E3 ubiquitin-protein ligase UHRF1 OS=Mus musculus GN=Uhrf1 PE=1 SV=2|Isoform 2 of E3 ubiquitin-protein ligase UHRF1 OS=Mus musculus GN=Uhrf1	3	2	-0.280382	0.0175706	0.16886	(DKO_1 - WT) - (DKO_2 - WT)	no hit
Trim67	Q505D9	Tripartite motif-containing protein 67 OS=Mus musculus GN=Trim67 PE=2 SV=1	3	2	-0.280168	0.177697	0.489381	DKO_1 - WT	no hit
Bpnt1	Q9Z0S1	3'(2'),5'-bisphosphate nucleotidase 1 OS=Mus musculus GN=Bpnt1 PE=1 SV=2	3	2	-0.279831	0.120238	0.433452	(DKO_1 - WT) - (DKO_2 - WT)	no hit
Pdcd6	P12815|P12815-2	Programmed cell death protein 6 OS=Mus musculus GN=Pdcd6 PE=1 SV=2|Isoform 2 of Programmed cell death protein 6 OS=Mus musculus GN=Pdcd6	3	2	-0.279593	0.0488246	0.27453	DKO_1 - WT	no hit
Cdk5rap2	Q8K389	CDK5 regulatory subunit-associated protein 2 OS=Mus musculus GN=Cdk5rap2 PE=1 SV=3	3	2	-0.27949	0.0222478	0.188163	DKO_1 - WT	no hit
Tax1bp1	Q3UKC1	Tax1-binding protein 1 homolog OS=Mus musculus GN=Tax1bp1 PE=1 SV=2	3	2	-0.278929	0.055904	0.292459	DKO_1 - WT	no hit
Ppp1r13b	Q62415	Apoptosis-stimulating of p53 protein 1 OS=Mus musculus GN=Ppp1r13b PE=1 SV=2	3	2	-0.278784	0.0324878	0.234165	(DKO_1 - WT) - (DKO_2 - WT)	no hit
Adamts17	D3YX90|E9Q4D1	Protein Adamts17 OS=Mus musculus GN=Adamts17 PE=1 SV=1|Protein Adamts17 OS=Mus musculus GN=Adamts17 PE=1 SV=1	3	2	-0.278504	0.0647511	0.318454	(DKO_1 - WT) - (DKO_2 - WT)	no hit
Agfg2	Q3TBU7|Q3U2K8|Q80WC7|Q80WC7-2	Arf-GAP domain and FG repeat-containing protein 2 (Fragment) OS=Mus musculus GN=Agfg2 PE=1 SV=1|Arf-GAP domain and FG repeat-containing protein 2 OS=Mus musculus GN=Agfg2 PE=1 SV=1|Arf-GAP domain and FG repeat-containing protein 2 OS=Mus musculus GN=Agfg2 PE=1 SV=1|Isoform 2 of Arf-GAP domain and FG repeat-containing protein 2 OS=Mus musculus GN=Agfg2	3	2	-0.278478	0.0309439	0.228602	(DKO_1 - WT) - (DKO_2 - WT)	no hit
Hif1an	Q8BLR9	Hypoxia-inducible factor 1-alpha inhibitor OS=Mus musculus GN=Hif1an PE=1 SV=2	3	2	-0.278132	0.0194381	0.174647	DKO_1 - WT	no hit
Fam234a	D3Z6P3|Q8C0Z1	Protein FAM234A (Fragment) OS=Mus musculus GN=Fam234a PE=1 SV=7|Protein FAM234A OS=Mus musculus GN=Fam234a PE=1 SV=1	3	2	-0.277817	0.0273439	0.923855	DKO_2 - WT	no hit
Arrb1	J3QNU6|Q8BWG8|Q8BWG8-2	Beta-arrestin-1 OS=Mus musculus GN=Arrb1 PE=1 SV=1|Beta-arrestin-1 OS=Mus musculus GN=Arrb1 PE=1 SV=1|Isoform 1B of Beta-arrestin-1 OS=Mus musculus GN=Arrb1	3	2	-0.277624	0.0214193	0.18551	(DKO_1 - WT) - (DKO_2 - WT)	no hit
Acox3	Q9EPL9	Peroxisomal acyl-coenzyme A oxidase 3 OS=Mus musculus GN=Acox3 PE=1 SV=2	3	2	-0.277577	0.028315	0.209085	DKO_1 - WT	no hit
Chsy3	Q5DTK1	Chondroitin sulfate synthase 3 OS=Mus musculus GN=Chsy3 PE=2 SV=3	3	2	-0.277434	0.0301964	0.217481	DKO_1 - WT	no hit
Loxl2	P58022|P58022-2	Lysyl oxidase homolog 2 OS=Mus musculus GN=Loxl2 PE=1 SV=2|Isoform 2 of Lysyl oxidase homolog 2 OS=Mus musculus GN=Loxl2	3	2	-0.277341	0.0177976	0.169496	(DKO_1 - WT) - (DKO_2 - WT)	no hit
Jak2	G5E852|Q62120	Tyrosine-protein kinase OS=Mus musculus GN=Jak2 PE=1 SV=1|Tyrosine-protein kinase JAK2 OS=Mus musculus GN=Jak2 PE=1 SV=2	3	2	-0.277234	0.0379717	0.243402	DKO_1 - WT	no hit
Itga6	Q61739-2	Isoform Alpha-6X1A of Integrin alpha-6 OS=Mus musculus GN=Itga6	3	2	-0.276945	0.0192723	0.846313	DKO_2 - WT	no hit
Ap1ar	E9PYF7	AP1AR OS=Mus musculus GN=Ap1ar PE=1 SV=1	3	2	-0.27688	0.0322046	0.23342	(DKO_1 - WT) - (DKO_2 - WT)	no hit
Kirrel	Q80W68	Kin of IRRE-like protein 1 OS=Mus musculus GN=Kirrel PE=1 SV=1	3	2	-0.276833	0.0437939	0.265651	(DKO_1 - WT) - (DKO_2 - WT)	no hit
Tsr2	H7BWY8|Q8C8T8|Z4YL87	Pre-rRNA-processing protein TSR2 homolog OS=Mus musculus GN=Tsr2 PE=1 SV=1|Pre-rRNA-processing protein TSR2 homolog OS=Mus musculus GN=Tsr2 PE=1 SV=1|Pre-rRNA-processing protein TSR2 homolog OS=Mus musculus GN=Tsr2 PE=1 SV=1	3	2	-0.276774	0.0310833	0.220193	DKO_1 - WT	no hit
Ppp1r10	Q80W00	Serine/threonine-protein phosphatase 1 regulatory subunit 10 OS=Mus musculus GN=Ppp1r10 PE=1 SV=1	3	2	-0.276758	0.0323357	0.949147	DKO_2 - WT	no hit
Hmgn5	Q9JL35	High mobility group nucleosome-binding domain-containing protein 5 OS=Mus musculus GN=Hmgn5 PE=1 SV=2	3	2	-0.276506	0.034497	0.960437	DKO_2 - WT	no hit
Sugp1	Q8CH02	SURP and G-patch domain-containing protein 1 OS=Mus musculus GN=Sugp1 PE=1 SV=1	3	2	-0.276118	0.0399506	0.96119	DKO_2 - WT	no hit
Epha3	Q8BRB1	Eph receptor A3 OS=Mus musculus GN=Epha3 PE=1 SV=1	3	2	-0.276039	0.0456312	0.27132	(DKO_1 - WT) - (DKO_2 - WT)	no hit
Q9D735	Q9D735	Uncharacterized protein C19orf43 homolog OS=Mus musculus PE=1 SV=1	3	2	-0.275677	0.0497438	0.277112	DKO_1 - WT	no hit
Uimc1	A0A0R4J073|E9PWM5|E9Q577|Q5U5Q9|Q5U5Q9-2	BRCA1-A complex subunit RAP80 OS=Mus musculus GN=Uimc1 PE=1 SV=1|BRCA1-A complex subunit RAP80 OS=Mus musculus GN=Uimc1 PE=1 SV=1|BRCA1-A complex subunit RAP80 OS=Mus musculus GN=Uimc1 PE=1 SV=1|BRCA1-A complex subunit RAP80 OS=Mus musculus GN=Uimc1 PE=1 SV=2|Isoform 2 of BRCA1-A complex subunit RAP80 OS=Mus musculus GN=Uimc1	3	2	-0.275487	0.0230774	0.191436	DKO_1 - WT	no hit
Bsdc1	Q80Y55	BSD domain-containing protein 1 OS=Mus musculus GN=Bsdc1 PE=1 SV=1	3	2	-0.275433	0.0996956	0.380036	DKO_1 - WT	no hit
Arfgap3	A0A0R4J0T8	ADP-ribosylation factor GTPase-activating protein 3 OS=Mus musculus GN=Arfgap3 PE=1 SV=1	3	2	-0.274836	0.0416799	0.261301	(DKO_1 - WT) - (DKO_2 - WT)	no hit
Tmco3	Q8BH01|Q8BH01-2	Transmembrane and coiled-coil domain-containing protein 3 OS=Mus musculus GN=Tmco3 PE=2 SV=1|Isoform 2 of Transmembrane and coiled-coil domain-containing protein 3 OS=Mus musculus GN=Tmco3	3	2	-0.274746	0.0244766	0.200872	(DKO_1 - WT) - (DKO_2 - WT)	no hit
Hat1	Q8BY71	Histone acetyltransferase type B catalytic subunit OS=Mus musculus GN=Hat1 PE=1 SV=1	3	2	-0.274344	0.127811	0.447133	(DKO_1 - WT) - (DKO_2 - WT)	no hit
Cyth3	G5E8Q4|O08967|Q3TXK1	Cytohesin-3 OS=Mus musculus GN=Cyth3 PE=1 SV=1|Cytohesin-3 OS=Mus musculus GN=Cyth3 PE=1 SV=1|Cytohesin-3 OS=Mus musculus GN=Cyth3 PE=1 SV=1	3	2	-0.273898	0.0300634	0.216932	DKO_1 - WT	no hit
Pcdh1	Q8CFX3	Protein Pcdh1 OS=Mus musculus GN=Pcdh1 PE=1 SV=1	3	2	-0.273873	0.0352779	0.961174	DKO_2 - WT	no hit
Serpine2	Q07235|Q543R5	Glia-derived nexin OS=Mus musculus GN=Serpine2 PE=1 SV=2|Glia-derived nexin OS=Mus musculus GN=Serpine2 PE=1 SV=1	3	2	-0.2738	0.0344398	0.239574	(DKO_1 - WT) - (DKO_2 - WT)	no hit
Arl2bp	Q9D385|Q9D385-2	ADP-ribosylation factor-like protein 2-binding protein OS=Mus musculus GN=Arl2bp PE=1 SV=1|Isoform 2 of ADP-ribosylation factor-like protein 2-binding protein OS=Mus musculus GN=Arl2bp	3	2	-0.273638	0.0779731	0.343155	DKO_1 - WT	no hit
Smarcal1	Q8BJL0	SWI/SNF-related matrix-associated actin-dependent regulator of chromatin subfamily A-like protein 1 OS=Mus musculus GN=Smarcal1 PE=1 SV=1	3	2	-0.273619	0.0236607	0.197284	(DKO_1 - WT) - (DKO_2 - WT)	no hit
Cope	O89079	Coatomer subunit epsilon OS=Mus musculus GN=Cope PE=1 SV=3	3	2	-0.273482	0.0316706	0.230727	(DKO_1 - WT) - (DKO_2 - WT)	no hit
Sarnp	B2RXM7|Q9D1J3	MCG113697 OS=Mus musculus GN=Sarnp PE=1 SV=1|SAP domain-containing ribonucleoprotein OS=Mus musculus GN=Sarnp PE=1 SV=3	3	2	-0.273381	0.0261594	0.902828	DKO_2 - WT	no hit
Mmp14	P53690	Matrix metalloproteinase-14 OS=Mus musculus GN=Mmp14 PE=2 SV=3	3	2	-0.273158	0.0414573	0.96119	DKO_2 - WT	no hit
Ing1	Q9QXV3	Inhibitor of growth protein 1 OS=Mus musculus GN=Ing1 PE=2 SV=1	3	2	-0.272757	0.024851	0.893901	DKO_2 - WT	no hit
Pml	D3YXR5|D3Z3A6|Q60953	Protein PML OS=Mus musculus GN=Pml PE=1 SV=1|Protein PML OS=Mus musculus GN=Pml PE=1 SV=1|Protein PML OS=Mus musculus GN=Pml PE=1 SV=3	3	2	-0.272481	0.0760263	0.977137	DKO_2 - WT	no hit
Col5a1	B1AWB9|O88207	Collagen alpha-1(V) chain OS=Mus musculus GN=Col5a1 PE=1 SV=1|Collagen alpha-1(V) chain OS=Mus musculus GN=Col5a1 PE=1 SV=2	3	2	-0.272054	0.0626697	0.965486	DKO_2 - WT	no hit
Arfgap1	Q9EPJ9	ADP-ribosylation factor GTPase-activating protein 1 OS=Mus musculus GN=Arfgap1 PE=1 SV=2	3	2	-0.27192	0.0414665	0.261159	(DKO_1 - WT) - (DKO_2 - WT)	no hit
Adcy6	F8VQ52|Q01341	Adenylate cyclase type 6 OS=Mus musculus GN=Adcy6 PE=1 SV=1|Adenylate cyclase type 6 OS=Mus musculus GN=Adcy6 PE=1 SV=1	3	2	-0.27185	0.0266464	0.210907	(DKO_1 - WT) - (DKO_2 - WT)	no hit
Snrpd1	P62315	Small nuclear ribonucleoprotein Sm D1 OS=Mus musculus GN=Snrpd1 PE=1 SV=1	3	2	-0.271819	0.0431594	0.96119	DKO_2 - WT	no hit
Actn4	E9Q2W9|P57780|Q3ULT2	Alpha-actinin-4 (Fragment) OS=Mus musculus GN=Actn4 PE=1 SV=1|Alpha-actinin-4 OS=Mus musculus GN=Actn4 PE=1 SV=1|Actinin alpha 4 OS=Mus musculus GN=Actn4 PE=1 SV=1	3	2	-0.271776	0.0304963	0.933257	DKO_2 - WT	no hit
Hdac5	A2AWS5|B7ZDF5|B7ZDF7|Q3UJF1|Q9Z2V6	Histone deacetylase 5 OS=Mus musculus GN=Hdac5 PE=1 SV=1|Histone deacetylase OS=Mus musculus GN=Hdac5 PE=1 SV=1|Histone deacetylase OS=Mus musculus GN=Hdac5 PE=1 SV=1|Histone deacetylase OS=Mus musculus GN=Hdac5 PE=1 SV=1|Histone deacetylase 5 OS=Mus musculus GN=Hdac5 PE=1 SV=2	3	2	-0.271752	0.0549893	0.294929	(DKO_1 - WT) - (DKO_2 - WT)	no hit
Dhx33	Q80VY9	Putative ATP-dependent RNA helicase DHX33 OS=Mus musculus GN=Dhx33 PE=1 SV=1	3	2	-0.27146	0.0232502	0.192132	DKO_1 - WT	no hit
Mrpl22	Q8BU88	39S ribosomal protein L22, mitochondrial OS=Mus musculus GN=Mrpl22 PE=1 SV=1	3	2	-0.271398	0.0297229	0.223421	(DKO_1 - WT) - (DKO_2 - WT)	no hit
Cfl2	P45591|Q3UHW9	Cofilin-2 OS=Mus musculus GN=Cfl2 PE=1 SV=1|Cofilin-2 OS=Mus musculus GN=Cfl2 PE=1 SV=1	3	2	-0.271355	0.0513132	0.284747	(DKO_1 - WT) - (DKO_2 - WT)	no hit
Esyt2	Q3TZZ7	Extended synaptotagmin-2 OS=Mus musculus GN=Esyt2 PE=1 SV=1	3	2	-0.271314	0.0206671	0.181747	DKO_1 - WT	no hit
Efnb1	P52795|Q544L9	Ephrin-B1 OS=Mus musculus GN=Efnb1 PE=1 SV=1|Ephrin B1, isoform CRA_a OS=Mus musculus GN=Efnb1 PE=1 SV=1	3	2	-0.270823	0.0292817	0.212949	DKO_1 - WT	no hit
Ankfy1	Q810B6	Rabankyrin-5 OS=Mus musculus GN=Ankfy1 PE=1 SV=2	3	2	-0.270821	0.0439402	0.265673	(DKO_1 - WT) - (DKO_2 - WT)	no hit
Mpdz	D3YUX2|Q8VBX6|Q8VBX6-2|Q8VBX6-3|Q8VBX6-4	Multiple PDZ domain protein OS=Mus musculus GN=Mpdz PE=1 SV=1|Multiple PDZ domain protein OS=Mus musculus GN=Mpdz PE=1 SV=2|Isoform 2 of Multiple PDZ domain protein OS=Mus musculus GN=Mpdz|Isoform 3 of Multiple PDZ domain protein OS=Mus musculus GN=Mpdz|Isoform 4 of Multiple PDZ domain protein OS=Mus musculus GN=Mpdz	3	2	-0.270811	0.032801	0.234857	(DKO_1 - WT) - (DKO_2 - WT)	no hit
Coro7	Q9D2V7	Coronin-7 OS=Mus musculus GN=Coro7 PE=1 SV=2	3	2	-0.270266	0.0417292	0.261301	(DKO_1 - WT) - (DKO_2 - WT)	no hit
Rnf149	Q3U2C5|Q3U2C5-2	E3 ubiquitin-protein ligase RNF149 OS=Mus musculus GN=Rnf149 PE=1 SV=3|Isoform 2 of E3 ubiquitin-protein ligase RNF149 OS=Mus musculus GN=Rnf149	3	2	-0.269944	0.135004	0.999773	DKO_2 - WT	no hit
Lama1	F8VQ40|P19137	Laminin subunit alpha-1 OS=Mus musculus GN=Lama1 PE=1 SV=1|Laminin subunit alpha-1 OS=Mus musculus GN=Lama1 PE=1 SV=1	3	2	-0.269864	0.105837	0.999773	DKO_2 - WT	no hit
Gpc3	Q3TWB2|Q8CFZ4	Glypican 3 OS=Mus musculus GN=Gpc3 PE=1 SV=1|Glypican-3 OS=Mus musculus GN=Gpc3 PE=2 SV=1	3	2	-0.269664	0.0222888	0.189997	(DKO_1 - WT) - (DKO_2 - WT)	no hit
Pgbd5	D3YZI9	Protein Pgbd5 OS=Mus musculus GN=Pgbd5 PE=1 SV=1	3	2	-0.269648	0.0234801	0.196378	(DKO_1 - WT) - (DKO_2 - WT)	no hit
Dnajc1	Q61712	DnaJ homolog subfamily C member 1 OS=Mus musculus GN=Dnajc1 PE=1 SV=1	3	2	-0.269644	0.0503114	0.96119	DKO_2 - WT	no hit
Tm7sf3	A0A0R4J0K4|Q9CRG1	Transmembrane 7 superfamily member 3 OS=Mus musculus GN=Tm7sf3 PE=1 SV=1|Transmembrane 7 superfamily member 3 OS=Mus musculus GN=Tm7sf3 PE=2 SV=2	3	2	-0.269615	0.0685119	0.974338	DKO_2 - WT	no hit
Taf4	E9QAP7	Protein Taf4 OS=Mus musculus GN=Taf4 PE=1 SV=1	3	2	-0.269535	0.0283808	0.924486	DKO_2 - WT	no hit
Trap1	Q9CQN1	Heat shock protein 75 kDa, mitochondrial OS=Mus musculus GN=Trap1 PE=1 SV=1	3	2	-0.269533	0.0245916	0.195584	DKO_1 - WT	no hit
Txnl4a	P83877	Thioredoxin-like protein 4A OS=Mus musculus GN=Txnl4a PE=1 SV=1	3	2	-0.269454	0.0511355	0.284491	(DKO_1 - WT) - (DKO_2 - WT)	no hit
Oxr1	E9Q0A7	Oxidation resistance protein 1 OS=Mus musculus GN=Oxr1 PE=1 SV=1	3	2	-0.269328	0.0245856	0.195584	DKO_1 - WT	no hit
Pold2	O35654	DNA polymerase delta subunit 2 OS=Mus musculus GN=Pold2 PE=1 SV=2	3	2	-0.269309	0.0798123	0.358547	(DKO_1 - WT) - (DKO_2 - WT)	no hit
Ano10	Q8BH79	Anoctamin-10 OS=Mus musculus GN=Ano10 PE=1 SV=1	3	2	-0.269293	0.030611	0.218213	DKO_1 - WT	no hit
Kif26b	Q7TNC6	Kinesin-like protein KIF26B OS=Mus musculus GN=Kif26b PE=1 SV=3	3	2	-0.268951	0.0352771	0.241395	(DKO_1 - WT) - (DKO_2 - WT)	no hit
Rps21	Q9CQR2	40S ribosomal protein S21 OS=Mus musculus GN=Rps21 PE=1 SV=1	3	2	-0.26895	0.0226882	0.190399	DKO_1 - WT	no hit
Vcl	Q64727	Vinculin OS=Mus musculus GN=Vcl PE=1 SV=4	3	2	-0.268786	0.0334908	0.227731	DKO_1 - WT	no hit
Rab9|Rab9a	Q0PD48|Q9R0M6	MCG116026, isoform CRA_a OS=Mus musculus GN=Rab9 PE=1 SV=1|Ras-related protein Rab-9A OS=Mus musculus GN=Rab9a PE=1 SV=1	3	2	-0.26871	0.0219552	0.186949	DKO_1 - WT	no hit
Polr2g	P62488	DNA-directed RNA polymerase II subunit RPB7 OS=Mus musculus GN=Polr2g PE=1 SV=1	3	2	-0.26867	0.0709368	0.328928	DKO_1 - WT	no hit
Lrrc16a	D3Z030|F7AI27|Q6EDY6|Q6EDY6-3	F-actin-uncapping protein LRRC16A OS=Mus musculus GN=Lrrc16a PE=1 SV=2|F-actin-uncapping protein LRRC16A (Fragment) OS=Mus musculus GN=Lrrc16a PE=1 SV=1|F-actin-uncapping protein LRRC16A OS=Mus musculus GN=Lrrc16a PE=1 SV=2|Isoform 3 of F-actin-uncapping protein LRRC16A OS=Mus musculus GN=Lrrc16a	3	2	-0.268534	0.0257731	0.200468	DKO_1 - WT	no hit
Hmox1	P14901|Q3U5U6	Heme oxygenase 1 OS=Mus musculus GN=Hmox1 PE=1 SV=1|Heme oxygenase 1 OS=Mus musculus GN=Hmox1 PE=1 SV=1	3	2	-0.26838	0.0295994	0.214299	DKO_1 - WT	no hit
Papolg	Q6PCL9	Poly(A) polymerase gamma OS=Mus musculus GN=Papolg PE=1 SV=1	3	2	-0.2682	0.0244407	0.200872	(DKO_1 - WT) - (DKO_2 - WT)	no hit
Jade1	Q6ZPI0	Protein Jade-1 OS=Mus musculus GN=Jade1 PE=1 SV=2	3	2	-0.268034	0.03015	0.226108	(DKO_1 - WT) - (DKO_2 - WT)	no hit
Eif2a	Q8BJW6	Eukaryotic translation initiation factor 2A OS=Mus musculus GN=Eif2a PE=1 SV=2	3	2	-0.267937	0.0219532	0.186949	DKO_1 - WT	no hit
Sdf2	A0A0R4IZW9|Q9DCT5	Stromal cell-derived factor 2 OS=Mus musculus GN=Sdf2 PE=1 SV=1|Stromal cell-derived factor 2 OS=Mus musculus GN=Sdf2 PE=1 SV=1	3	2	-0.267902	0.0397347	0.256409	(DKO_1 - WT) - (DKO_2 - WT)	no hit
St3gal1	P54751|Q544T4	CMP-N-acetylneuraminate-beta-galactosamide-alpha-2,3-sialyltransferase 1 OS=Mus musculus GN=St3gal1 PE=2 SV=1|CMP-N-acetylneuraminate-beta-galactosamide-alpha-2,3-sialyltransferase 1 OS=Mus musculus GN=St3gal1 PE=1 SV=1	3	2	-0.267728	0.0275921	0.214211	(DKO_1 - WT) - (DKO_2 - WT)	no hit
Slit3	Q9WVB4	Slit homolog 3 protein OS=Mus musculus GN=Slit3 PE=2 SV=2	3	2	-0.267657	0.0366232	0.96119	DKO_2 - WT	no hit
Pacsin3	Q543N7|Q99JB8	Protein kinase C and casein kinase II substrate protein 3 OS=Mus musculus GN=Pacsin3 PE=1 SV=1|Protein kinase C and casein kinase II substrate protein 3 OS=Mus musculus GN=Pacsin3 PE=1 SV=1	3	2	-0.267536	0.0242495	0.193966	DKO_1 - WT	no hit
Mecr	Q9DCS3	Trans-2-enoyl-CoA reductase, mitochondrial OS=Mus musculus GN=Mecr PE=1 SV=2	3	2	-0.26712	0.0251601	0.203634	(DKO_1 - WT) - (DKO_2 - WT)	no hit
Echdc2	Q3TLP5	Enoyl-CoA hydratase domain-containing protein 2, mitochondrial OS=Mus musculus GN=Echdc2 PE=1 SV=2	3	2	-0.266917	0.0329845	0.226615	DKO_1 - WT	no hit
Ifnar1	P33896	Interferon alpha/beta receptor 1 OS=Mus musculus GN=Ifnar1 PE=1 SV=2	3	2	-0.266759	0.0514785	0.285044	(DKO_1 - WT) - (DKO_2 - WT)	no hit
Fastkd2	Q922E6	FAST kinase domain-containing protein 2, mitochondrial OS=Mus musculus GN=Fastkd2 PE=2 SV=2	3	2	-0.26655	0.021599	0.186073	(DKO_1 - WT) - (DKO_2 - WT)	no hit
Mmaa	Q8C7H1	Methylmalonic aciduria type A homolog, mitochondrial OS=Mus musculus GN=Mmaa PE=1 SV=1	3	2	-0.266541	0.0263456	0.202014	DKO_1 - WT	no hit
Capns1	A0A0R4IZW8|A0A0R4J1C2|O88456	Calpain small subunit 1 OS=Mus musculus GN=Capns1 PE=1 SV=1|Calpain small subunit 1 OS=Mus musculus GN=Capns1 PE=1 SV=1|Calpain small subunit 1 OS=Mus musculus GN=Capns1 PE=1 SV=1	3	2	-0.266416	0.0218207	0.186949	DKO_1 - WT	no hit
Stim1	P70302	Stromal interaction molecule 1 OS=Mus musculus GN=Stim1 PE=1 SV=2	3	2	-0.266317	0.0432776	0.265101	(DKO_1 - WT) - (DKO_2 - WT)	no hit
Fam76a	Q922G2	Protein FAM76A OS=Mus musculus GN=Fam76a PE=2 SV=1	3	2	-0.266296	0.0363903	0.236647	DKO_1 - WT	no hit
Alg12	Q8VCA2|Q8VDB2	Mannosyltransferase OS=Mus musculus GN=Alg12 PE=1 SV=1|Dol-P-Man:Man(7)GlcNAc(2)-PP-Dol alpha-1,6-mannosyltransferase OS=Mus musculus GN=Alg12 PE=2 SV=2	3	2	-0.266291	0.0598496	0.308242	(DKO_1 - WT) - (DKO_2 - WT)	no hit
Fdps	Q4FJN9|Q920E5	Farnesyl pyrophosphate synthase OS=Mus musculus GN=Fdps PE=1 SV=1|Farnesyl pyrophosphate synthase OS=Mus musculus GN=Fdps PE=1 SV=1	3	2	-0.266256	0.0685717	0.322337	DKO_1 - WT	no hit
Ccdc134	Q8C7V8|Q8C7V8-2	Coiled-coil domain-containing protein 134 OS=Mus musculus GN=Ccdc134 PE=1 SV=1|Isoform 2 of Coiled-coil domain-containing protein 134 OS=Mus musculus GN=Ccdc134	3	2	-0.266109	0.0247515	0.196032	DKO_1 - WT	no hit
Piezo1	E9PUQ9	Piezo-type mechanosensitive ion channel component OS=Mus musculus GN=Piezo1 PE=1 SV=1	3	2	-0.266051	0.0221214	0.864468	DKO_2 - WT	no hit
Slc25a1	Q8JZU2	Tricarboxylate transport protein, mitochondrial OS=Mus musculus GN=Slc25a1 PE=1 SV=1	3	2	-0.265781	0.0310279	0.228602	(DKO_1 - WT) - (DKO_2 - WT)	no hit
Setdb1	D3YYC3|G5E8N3|O88974|O88974-4	Histone-lysine N-methyltransferase SETDB1 OS=Mus musculus GN=Setdb1 PE=1 SV=1|Histone-lysine N-methyltransferase SETDB1 OS=Mus musculus GN=Setdb1 PE=1 SV=1|Histone-lysine N-methyltransferase SETDB1 OS=Mus musculus GN=Setdb1 PE=1 SV=1|Isoform 4 of Histone-lysine N-methyltransferase SETDB1 OS=Mus musculus GN=Setdb1	3	2	-0.265708	0.0645795	0.318454	(DKO_1 - WT) - (DKO_2 - WT)	no hit
Fam32a	Q9CR80	Protein FAM32A OS=Mus musculus GN=Fam32a PE=2 SV=1	3	2	-0.265687	0.037753	0.242641	DKO_1 - WT	no hit
Zadh2	Q14AZ9|Q8BGC4	Zinc binding alcohol dehydrogenase, domain containing 2 OS=Mus musculus GN=Zadh2 PE=1 SV=1|Zinc-binding alcohol dehydrogenase domain-containing protein 2 OS=Mus musculus GN=Zadh2 PE=1 SV=1	3	2	-0.265659	0.0437327	0.259793	DKO_1 - WT	no hit
Gpm6b	A2AEG6|P35803|P35803-8	Glycoprotein m6b, isoform CRA_g OS=Mus musculus GN=Gpm6b PE=1 SV=1|Neuronal membrane glycoprotein M6-b OS=Mus musculus GN=Gpm6b PE=1 SV=2|Isoform 8 of Neuronal membrane glycoprotein M6-b OS=Mus musculus GN=Gpm6b	3	2	-0.265625	0.082383	0.997049	DKO_2 - WT	no hit
Cyb5a	G5E850|P56395|Q544Z9	Cytochrome b-5, isoform CRA_a OS=Mus musculus GN=Cyb5a PE=1 SV=1|Cytochrome b5 OS=Mus musculus GN=Cyb5a PE=1 SV=2|Cytochrome b-5, isoform CRA_d OS=Mus musculus GN=Cyb5a PE=1 SV=1	3	2	-0.265442	0.0465196	0.272604	(DKO_1 - WT) - (DKO_2 - WT)	no hit
Slc29a3	Q99P65	Equilibrative nucleoside transporter 3 OS=Mus musculus GN=Slc29a3 PE=1 SV=1	3	2	-0.26528	0.0219207	0.186949	DKO_1 - WT	no hit
Klf12	O35738	Krueppel-like factor 12 OS=Mus musculus GN=Klf12 PE=1 SV=2	3	2	-0.265166	0.0667362	0.317156	DKO_1 - WT	no hit
Gldc	Q91W43	Glycine dehydrogenase (decarboxylating), mitochondrial OS=Mus musculus GN=Gldc PE=1 SV=1	3	2	-0.265131	0.0223258	0.867229	DKO_2 - WT	no hit
Sall1	Q6P5E3|Q9ER74	Sal-like 1 (Drosophila) OS=Mus musculus GN=Sall1 PE=1 SV=1|Sal-like protein 1 OS=Mus musculus GN=Sall1 PE=1 SV=1	3	2	-0.265101	0.037388	0.96119	DKO_2 - WT	no hit
Slc27a3	G3X8Y7|O88561	Long-chain fatty acid transport protein 3 OS=Mus musculus GN=Slc27a3 PE=1 SV=1|Long-chain fatty acid transport protein 3 OS=Mus musculus GN=Slc27a3 PE=1 SV=2	3	2	-0.264919	0.034715	0.231922	DKO_1 - WT	no hit
Ric1	E9QPA1|Q69ZJ7	RAB6A-GEF complex partner protein 1 OS=Mus musculus GN=Ric1 PE=1 SV=1|RAB6A-GEF complex partner protein 1 OS=Mus musculus GN=Ric1 PE=1 SV=2	3	2	-0.264909	0.0418747	0.254522	DKO_1 - WT	no hit
Pik3r3	Q3UXE9|Q64143	Phosphatidylinositol 3 kinase, regulatory subunit, polypeptide 3 (P55) OS=Mus musculus GN=Pik3r3 PE=1 SV=1|Phosphatidylinositol 3-kinase regulatory subunit gamma OS=Mus musculus GN=Pik3r3 PE=1 SV=1	3	2	-0.264794	0.250394	0.596294	(DKO_1 - WT) - (DKO_2 - WT)	no hit
Cenpi	Q8K1K4	Centromere protein I OS=Mus musculus GN=Cenpi PE=2 SV=1	3	2	-0.264761	0.129206	0.44803	(DKO_1 - WT) - (DKO_2 - WT)	no hit
Trim71	Q1PSW8	E3 ubiquitin-protein ligase TRIM71 OS=Mus musculus GN=Trim71 PE=1 SV=1	3	2	-0.264707	0.0617754	0.311957	(DKO_1 - WT) - (DKO_2 - WT)	no hit
Mvk	Q3UEB4	Mevalonate kinase OS=Mus musculus GN=Mvk PE=1 SV=1	3	2	-0.264633	0.0806825	0.360459	(DKO_1 - WT) - (DKO_2 - WT)	no hit
Plcb3	P51432	1-phosphatidylinositol 4,5-bisphosphate phosphodiesterase beta-3 OS=Mus musculus GN=Plcb3 PE=1 SV=2	3	2	-0.264423	0.0260823	0.201904	DKO_1 - WT	no hit
Edf1	Q9JMG1	Endothelial differentiation-related factor 1 OS=Mus musculus GN=Edf1 PE=1 SV=1	3	2	-0.264321	0.0284081	0.209085	DKO_1 - WT	no hit
Fcf1	E9Q186|Q9CTH6	rRNA-processing protein FCF1 homolog OS=Mus musculus GN=Fcf1 PE=1 SV=1|rRNA-processing protein FCF1 homolog OS=Mus musculus GN=Fcf1 PE=2 SV=2	3	2	-0.264283	0.0240154	0.193966	DKO_1 - WT	no hit
Znf652	Q5DU09	Zinc finger protein 652 OS=Mus musculus GN=Znf652 PE=1 SV=2	3	2	-0.263967	0.0505299	0.96119	DKO_2 - WT	no hit
Stx2	Q3TJ55|Q80W45	Syntaxin-2 OS=Mus musculus GN=Stx2 PE=1 SV=1|Syntaxin 2 OS=Mus musculus GN=Stx2 PE=1 SV=1	3	2	-0.263675	0.0226961	0.191955	(DKO_1 - WT) - (DKO_2 - WT)	no hit
Fbxl20	Q9CZV8	F-box/LRR-repeat protein 20 OS=Mus musculus GN=Fbxl20 PE=1 SV=3	3	2	-0.263525	0.0614222	0.311773	(DKO_1 - WT) - (DKO_2 - WT)	no hit
Tarsl2	Q8BLY2	Probable threonine--tRNA ligase 2, cytoplasmic OS=Mus musculus GN=Tarsl2 PE=1 SV=1	3	2	-0.26337	0.0450937	0.270039	(DKO_1 - WT) - (DKO_2 - WT)	no hit
Itga2	Q62469	Integrin alpha-2 OS=Mus musculus GN=Itga2 PE=1 SV=2	3	2	-0.263059	0.0307196	0.933462	DKO_2 - WT	no hit
Tspan3	Q545L1|Q9QY33	Tetraspanin OS=Mus musculus GN=Tspan3 PE=1 SV=1|Tetraspanin-3 OS=Mus musculus GN=Tspan3 PE=1 SV=1	3	2	-0.262938	0.0603103	0.308543	(DKO_1 - WT) - (DKO_2 - WT)	no hit
Prepl	Q8C167	Prolyl endopeptidase-like OS=Mus musculus GN=Prepl PE=1 SV=1	3	2	-0.262937	0.0877411	0.359193	DKO_1 - WT	no hit
Dnm2	G3X9G4|P39054|Q3T9X3|Q3TCR7	Dynamin-2 OS=Mus musculus GN=Dnm2 PE=1 SV=1|Dynamin-2 OS=Mus musculus GN=Dnm2 PE=1 SV=2|Dynamin-2 OS=Mus musculus GN=Dnm2 PE=1 SV=1|Dynamin-2 OS=Mus musculus GN=Dnm2 PE=1 SV=1	3	2	-0.262897	0.0384625	0.243463	DKO_1 - WT	no hit
Zdhhc18	Q5Y5T2	Palmitoyltransferase ZDHHC18 OS=Mus musculus GN=Zdhhc18 PE=1 SV=4	3	2	-0.262833	0.0354298	0.241804	(DKO_1 - WT) - (DKO_2 - WT)	no hit
Grsf1	Q8C5Q4	G-rich sequence factor 1 OS=Mus musculus GN=Grsf1 PE=1 SV=2	3	2	-0.262624	0.023541	0.193304	DKO_1 - WT	no hit
Slbp	A0A0J9YV40|P97440|Q3U4T7|Q3V2L1	Histone RNA hairpin-binding protein OS=Mus musculus GN=Slbp PE=1 SV=1|Histone RNA hairpin-binding protein OS=Mus musculus GN=Slbp PE=1 SV=1|Histone RNA hairpin-binding protein OS=Mus musculus GN=Slbp PE=1 SV=1|Histone RNA hairpin-binding protein OS=Mus musculus GN=Slbp PE=1 SV=1	3	2	-0.26258	0.0237702	0.193448	DKO_1 - WT	no hit
Col6a3	E9PWQ3	Protein Col6a3 OS=Mus musculus GN=Col6a3 PE=1 SV=2	3	2	-0.26251	0.024103	0.193966	DKO_1 - WT	no hit
Inpp5f	A0A0J9YU13|Q8CDA1	Phosphatidylinositide phosphatase SAC2 OS=Mus musculus GN=Inpp5f PE=4 SV=1|Phosphatidylinositide phosphatase SAC2 OS=Mus musculus GN=Inpp5f PE=1 SV=1	3	2	-0.262478	0.0244461	0.893901	DKO_2 - WT	no hit
Cnst	Q8CBC4	Consortin OS=Mus musculus GN=Cnst PE=1 SV=1	3	2	-0.262187	0.0764653	0.340356	DKO_1 - WT	no hit
Ston2	E9PXP7|Q8BZ60	Stonin-2 OS=Mus musculus GN=Ston2 PE=1 SV=1|Stonin-2 OS=Mus musculus GN=Ston2 PE=1 SV=1	3	2	-0.262121	0.0336976	0.22858	DKO_1 - WT	no hit
Prkcd	P28867|Q1MX41|Q1MX43	Protein kinase C delta type OS=Mus musculus GN=Prkcd PE=1 SV=3|Protein kinase C delta type OS=Mus musculus GN=Prkcd PE=1 SV=1|Protein kinase C OS=Mus musculus GN=Prkcd PE=1 SV=1	3	2	-0.262112	0.0387924	0.244317	DKO_1 - WT	no hit
Ttbk1	Q6PCN3	Tau-tubulin kinase 1 OS=Mus musculus GN=Ttbk1 PE=1 SV=3	3	2	-0.261794	0.0361299	0.236083	DKO_1 - WT	no hit
Gga2	Q6P5E6	ADP-ribosylation factor-binding protein GGA2 OS=Mus musculus GN=Gga2 PE=1 SV=1	3	2	-0.261686	0.0288139	0.210728	DKO_1 - WT	no hit
Tulp3	O88413	Tubby-related protein 3 OS=Mus musculus GN=Tulp3 PE=1 SV=1	3	2	-0.261682	0.0602039	0.308242	(DKO_1 - WT) - (DKO_2 - WT)	no hit
Tmem129	Q8K304|Q8K304-2	E3 ubiquitin-protein ligase TM129 OS=Mus musculus GN=Tmem129 PE=2 SV=1|Isoform 2 of E3 ubiquitin-protein ligase TM129 OS=Mus musculus GN=Tmem129	3	2	-0.261631	0.0779246	0.355265	(DKO_1 - WT) - (DKO_2 - WT)	no hit
Tgfbr3	A0A0R4J097	Transforming growth factor beta receptor type 3 OS=Mus musculus GN=Tgfbr3 PE=1 SV=1	3	2	-0.26149	0.0451893	0.96119	DKO_2 - WT	no hit
Mib1	Q80SY4	E3 ubiquitin-protein ligase MIB1 OS=Mus musculus GN=Mib1 PE=1 SV=1	3	2	-0.261317	0.0275617	0.207657	DKO_1 - WT	no hit
Fermt2	Q3TLE2|Q8CIB5	Fermitin family homolog 2 OS=Mus musculus GN=Fermt2 PE=1 SV=1|Fermitin family homolog 2 OS=Mus musculus GN=Fermt2 PE=1 SV=1	3	2	-0.261184	0.0271765	0.211892	(DKO_1 - WT) - (DKO_2 - WT)	no hit
Ccdc124	Q9D8X2	Coiled-coil domain-containing protein 124 OS=Mus musculus GN=Ccdc124 PE=1 SV=1	3	2	-0.261173	0.0304247	0.21756	DKO_1 - WT	no hit
Mphosph10	Q810V0	U3 small nucleolar ribonucleoprotein protein MPP10 OS=Mus musculus GN=Mphosph10 PE=1 SV=2	3	2	-0.260964	0.0530365	0.286527	DKO_1 - WT	no hit
Uxs1	Q91XL3	UDP-glucuronic acid decarboxylase 1 OS=Mus musculus GN=Uxs1 PE=1 SV=1	3	2	-0.260919	0.0424999	0.262568	(DKO_1 - WT) - (DKO_2 - WT)	no hit
Pxdn	Q3UQ28	Peroxidasin homolog OS=Mus musculus GN=Pxdn PE=1 SV=2	3	2	-0.26079	0.0269489	0.204465	DKO_1 - WT	no hit
Cd63	P41731|Q549D0	CD63 antigen OS=Mus musculus GN=Cd63 PE=1 SV=2|Tetraspanin OS=Mus musculus GN=Cd63 PE=1 SV=1	3	2	-0.260725	0.0546369	0.961587	DKO_2 - WT	no hit
Uhrf1bp1	B2KF50	Protein Uhrf1bp1 OS=Mus musculus GN=Uhrf1bp1 PE=1 SV=1	3	2	-0.260581	0.0654939	0.320686	(DKO_1 - WT) - (DKO_2 - WT)	no hit
Ppp3cc	P48455|Q3V074	Serine/threonine-protein phosphatase 2B catalytic subunit gamma isoform OS=Mus musculus GN=Ppp3cc PE=1 SV=1|Serine/threonine-protein phosphatase OS=Mus musculus GN=Ppp3cc PE=1 SV=1	3	2	-0.260567	0.0390055	0.254004	(DKO_1 - WT) - (DKO_2 - WT)	no hit
Eif2ak3	E9QQ30	Eukaryotic translation initiation factor 2-alpha kinase 3 OS=Mus musculus GN=Eif2ak3 PE=1 SV=1	3	2	-0.260534	0.041539	0.261301	(DKO_1 - WT) - (DKO_2 - WT)	no hit
Mtx3	D3YTP3	Protein Mtx3 OS=Mus musculus GN=Mtx3 PE=1 SV=2	3	2	-0.260422	0.0942099	0.387958	(DKO_1 - WT) - (DKO_2 - WT)	no hit
Trim44	Q4KMS1	Tripartite motif-containing 44 OS=Mus musculus GN=Trim44 PE=1 SV=1	3	2	-0.259972	0.347833	0.680662	(DKO_1 - WT) - (DKO_2 - WT)	no hit
Sall2	Q9QX96	Sal-like protein 2 OS=Mus musculus GN=Sall2 PE=1 SV=2	3	2	-0.259954	0.0331555	0.952223	DKO_2 - WT	no hit
Ifitm2	Q99J93	Interferon-induced transmembrane protein 2 OS=Mus musculus GN=Ifitm2 PE=1 SV=1	3	2	-0.259851	0.171815	0.999773	DKO_2 - WT	no hit
Slc6a9	E9Q3V0|E9Q517|P28571|P28571-1|P28571-2	Transporter OS=Mus musculus GN=Slc6a9 PE=1 SV=1|Transporter OS=Mus musculus GN=Slc6a9 PE=1 SV=1|Sodium- and chloride-dependent glycine transporter 1 OS=Mus musculus GN=Slc6a9 PE=1 SV=3|Isoform GlyT-1A of Sodium- and chloride-dependent glycine transporter 1 OS=Mus musculus GN=Slc6a9|Isoform GlyT-1B of Sodium- and chloride-dependent glycine transporter 1 OS=Mus musculus GN=Slc6a9	3	2	-0.259786	0.0734054	0.34307	(DKO_1 - WT) - (DKO_2 - WT)	no hit
Dlgap5	A0A0R4J0G7|E9QQ48|Q8K4R9|Q8K4R9-2|Q8K4R9-3	Disks large-associated protein 5 OS=Mus musculus GN=Dlgap5 PE=1 SV=1|Disks large-associated protein 5 (Fragment) OS=Mus musculus GN=Dlgap5 PE=1 SV=2|Disks large-associated protein 5 OS=Mus musculus GN=Dlgap5 PE=1 SV=2|Isoform 2 of Disks large-associated protein 5 OS=Mus musculus GN=Dlgap5|Isoform 3 of Disks large-associated protein 5 OS=Mus musculus GN=Dlgap5	3	2	-0.259618	0.0285027	0.924486	DKO_2 - WT	no hit
Col6a2	Q02788	Collagen alpha-2(VI) chain OS=Mus musculus GN=Col6a2 PE=1 SV=3	3	2	-0.259384	0.0263369	0.903956	DKO_2 - WT	no hit
Sart1	Q9Z315	U4/U6.U5 tri-snRNP-associated protein 1 OS=Mus musculus GN=Sart1 PE=1 SV=1	3	2	-0.259293	0.0293491	0.933257	DKO_2 - WT	no hit
Peg3	Q3URU2	Paternally-expressed gene 3 protein OS=Mus musculus GN=Peg3 PE=1 SV=1	3	2	-0.259054	0.0302638	0.217481	DKO_1 - WT	no hit
Slc7a3	P70423	Cationic amino acid transporter 3 OS=Mus musculus GN=Slc7a3 PE=2 SV=1	3	2	-0.259006	0.050556	0.279588	DKO_1 - WT	no hit
Hectd3	Q3U487	E3 ubiquitin-protein ligase HECTD3 OS=Mus musculus GN=Hectd3 PE=1 SV=2	3	2	-0.25898	0.0270722	0.21136	(DKO_1 - WT) - (DKO_2 - WT)	no hit
Tmco3	Q8BH01|Q8BH01-2	Transmembrane and coiled-coil domain-containing protein 3 OS=Mus musculus GN=Tmco3 PE=2 SV=1|Isoform 2 of Transmembrane and coiled-coil domain-containing protein 3 OS=Mus musculus GN=Tmco3	3	2	-0.25891	0.0318679	0.223768	DKO_1 - WT	no hit
Sdhaf3	Q0VF92|Q8BQU3	ACN9 homolog (S. cerevisiae) OS=Mus musculus GN=Sdhaf3 PE=1 SV=1|Succinate dehydrogenase assembly factor 3, mitochondrial OS=Mus musculus GN=Sdhaf3 PE=2 SV=1	3	2	-0.25889	0.0270757	0.21136	(DKO_1 - WT) - (DKO_2 - WT)	no hit
Rif1	Q6PR54|Q6PR54-3	Telomere-associated protein RIF1 OS=Mus musculus GN=Rif1 PE=1 SV=2|Isoform 3 of Telomere-associated protein RIF1 OS=Mus musculus GN=Rif1	3	2	-0.258736	0.0310777	0.933462	DKO_2 - WT	no hit
Mtmr12	Q80TA6|Q80TA6-2	Myotubularin-related protein 12 OS=Mus musculus GN=Mtmr12 PE=1 SV=2|Isoform 2 of Myotubularin-related protein 12 OS=Mus musculus GN=Mtmr12	3	2	-0.258719	0.0386331	0.243743	DKO_1 - WT	no hit
Tfg	Q9Z1A1	Protein Tfg OS=Mus musculus GN=Tfg PE=1 SV=1	3	2	-0.258511	0.0550052	0.294929	(DKO_1 - WT) - (DKO_2 - WT)	no hit
Nsun4	Q9CZ57	5-methylcytosine rRNA methyltransferase NSUN4 OS=Mus musculus GN=Nsun4 PE=1 SV=1	3	2	-0.258503	0.0304845	0.21756	DKO_1 - WT	no hit
Mrs2	Q5NCE8	Magnesium transporter MRS2 homolog, mitochondrial OS=Mus musculus GN=Mrs2 PE=2 SV=2	3	2	-0.2585	0.0289137	0.220145	(DKO_1 - WT) - (DKO_2 - WT)	no hit
Fip1l1	Q9D824	Pre-mRNA 3'-end-processing factor FIP1 OS=Mus musculus GN=Fip1l1 PE=1 SV=1	3	2	-0.25849	0.0491807	0.96119	DKO_2 - WT	no hit
Stam2	O88811|O88811-2	Signal transducing adapter molecule 2 OS=Mus musculus GN=Stam2 PE=1 SV=1|Isoform 2 of Signal transducing adapter molecule 2 OS=Mus musculus GN=Stam2	3	2	-0.258423	0.0433579	0.265292	(DKO_1 - WT) - (DKO_2 - WT)	no hit
Fzd2	Q9JIP6	Frizzled-2 OS=Mus musculus GN=Fzd2 PE=2 SV=1	3	2	-0.258353	0.0592097	0.963731	DKO_2 - WT	no hit
Usp4	A0A0A6YW28|P35123	Ubiquitin carboxyl-terminal hydrolase 4 OS=Mus musculus GN=Usp4 PE=1 SV=1|Ubiquitin carboxyl-terminal hydrolase 4 OS=Mus musculus GN=Usp4 PE=1 SV=3	3	2	-0.258291	0.0395986	0.256108	(DKO_1 - WT) - (DKO_2 - WT)	no hit
Obsl1	A0A0B4J1L4|D3YYU8	Obscurin-like protein 1 OS=Mus musculus GN=Obsl1 PE=1 SV=1|Obscurin-like protein 1 OS=Mus musculus GN=Obsl1 PE=1 SV=1	3	2	-0.257829	0.0294139	0.213475	DKO_1 - WT	no hit
Gpa33	A0A0R4J209|Q9JKA5	Cell surface A33 antigen OS=Mus musculus GN=Gpa33 PE=1 SV=1|Cell surface A33 antigen OS=Mus musculus GN=Gpa33 PE=2 SV=2	3	2	-0.25744	0.0304995	0.933257	DKO_2 - WT	no hit
Znhit1	A0A0R4J1S6|D3YZ33|D3YZ34|D3Z017|G8JL39|Q8R331	Zinc finger HIT domain-containing protein 1 OS=Mus musculus GN=Znhit1 PE=1 SV=1|Zinc finger HIT domain-containing protein 1 OS=Mus musculus GN=Znhit1 PE=1 SV=1|Zinc finger HIT domain-containing protein 1 OS=Mus musculus GN=Znhit1 PE=1 SV=1|Zinc finger HIT domain-containing protein 1 (Fragment) OS=Mus musculus GN=Znhit1 PE=1 SV=1|Zinc finger HIT domain-containing protein 1 (Fragment) OS=Mus muscul…	3	2	-0.25705	0.0399379	0.247921	DKO_1 - WT	no hit
Dgcr14	O70279|Q3UFM6	Protein DGCR14 OS=Mus musculus GN=Dgcr14 PE=1 SV=2|Expressed sequence 2 embryonic lethal, isoform CRA_a OS=Mus musculus GN=Dgcr14 PE=1 SV=1	3	2	-0.256753	0.0494298	0.276186	DKO_1 - WT	no hit
Pvr	Q8K094	Nectin-2 OS=Mus musculus GN=Pvr PE=1 SV=1	3	2	-0.256679	0.0303865	0.933257	DKO_2 - WT	no hit
Cnnm4	Q69ZF7	Metal transporter CNNM4 OS=Mus musculus GN=Cnnm4 PE=1 SV=2	3	2	-0.256662	0.0414143	0.253606	DKO_1 - WT	no hit
Hmg20b	Q3U1L0|Q9Z104	High mobility group 20 B, isoform CRA_a OS=Mus musculus GN=Hmg20b PE=1 SV=1|SWI/SNF-related matrix-associated actin-dependent regulator of chromatin subfamily E member 1-related OS=Mus musculus GN=Hmg20b PE=1 SV=1	3	2	-0.256653	0.0296729	0.223304	(DKO_1 - WT) - (DKO_2 - WT)	no hit
Alg11	Q3TZM9|Q3TZM9-2	GDP-Man:Man(3)GlcNAc(2)-PP-Dol alpha-1,2-mannosyltransferase OS=Mus musculus GN=Alg11 PE=2 SV=1|Isoform 2 of GDP-Man:Man(3)GlcNAc(2)-PP-Dol alpha-1,2-mannosyltransferase OS=Mus musculus GN=Alg11	3	2	-0.256569	0.0346018	0.231882	DKO_1 - WT	no hit
Slc35c1	Q8BLX4|Q8R2I1	GDP-fucose transporter 1 OS=Mus musculus GN=Slc35c1 PE=2 SV=1|GDP-fucose transporter 1 OS=Mus musculus GN=Slc35c1 PE=1 SV=1	3	2	-0.256562	0.187983	0.528125	(DKO_1 - WT) - (DKO_2 - WT)	no hit
Tbcel	Q8C5W3|Q8C5W3-2	Tubulin-specific chaperone cofactor E-like protein OS=Mus musculus GN=Tbcel PE=1 SV=1|Isoform 2 of Tubulin-specific chaperone cofactor E-like protein OS=Mus musculus GN=Tbcel	3	2	-0.256542	0.0256894	0.205737	(DKO_1 - WT) - (DKO_2 - WT)	no hit
Tfb1m	Q8JZM0	Dimethyladenosine transferase 1, mitochondrial OS=Mus musculus GN=Tfb1m PE=1 SV=1	3	2	-0.25651	0.0281814	0.215835	(DKO_1 - WT) - (DKO_2 - WT)	no hit
Hs3st3b1	Q9QZS6	Heparan sulfate glucosamine 3-O-sulfotransferase 3B1 OS=Mus musculus GN=Hs3st3b1 PE=2 SV=2	3	2	-0.256434	0.0262067	0.202014	DKO_1 - WT	no hit
Aars2	Q14CH7	Alanine--tRNA ligase, mitochondrial OS=Mus musculus GN=Aars2 PE=1 SV=1	3	2	-0.256071	0.0397637	0.256409	(DKO_1 - WT) - (DKO_2 - WT)	no hit
Mov10	D3YVL0|D3Z3E8|E9PW39|P23249	Putative helicase MOV-10 OS=Mus musculus GN=Mov10 PE=1 SV=2|Putative helicase MOV-10 OS=Mus musculus GN=Mov10 PE=1 SV=1|Putative helicase MOV-10 OS=Mus musculus GN=Mov10 PE=1 SV=1|Putative helicase MOV-10 OS=Mus musculus GN=Mov10 PE=1 SV=2	3	2	-0.255966	0.0515309	0.96119	DKO_2 - WT	no hit
Hadha	Q8BMS1	Trifunctional enzyme subunit alpha, mitochondrial OS=Mus musculus GN=Hadha PE=1 SV=1	3	2	-0.255952	0.035023	0.240746	(DKO_1 - WT) - (DKO_2 - WT)	no hit
Nup62	Q5FWJ9|Q63850	Nuclear pore glycoprotein p62 OS=Mus musculus GN=Nup62 PE=1 SV=1|Nuclear pore glycoprotein p62 OS=Mus musculus GN=Nup62 PE=1 SV=2	3	2	-0.255897	0.0260891	0.207911	(DKO_1 - WT) - (DKO_2 - WT)	no hit
Lrrc17	Q9CXD9	Leucine-rich repeat-containing protein 17 OS=Mus musculus GN=Lrrc17 PE=2 SV=1	3	2	-0.255821	0.0608242	0.302907	DKO_1 - WT	no hit
Opcml	G5E8G3|Q6DFY2	MCG9827 OS=Mus musculus GN=Opcml PE=1 SV=1|Opioid binding protein/cell adhesion molecule-like OS=Mus musculus GN=Opcml PE=1 SV=1	3	2	-0.255644	0.0428655	0.263822	(DKO_1 - WT) - (DKO_2 - WT)	no hit
Anxa5	P48036	Annexin A5 OS=Mus musculus GN=Anxa5 PE=1 SV=1	3	2	-0.25559	0.0413578	0.260833	(DKO_1 - WT) - (DKO_2 - WT)	no hit
Lama5	Q61001	Laminin subunit alpha-5 OS=Mus musculus GN=Lama5 PE=1 SV=4	3	2	-0.255418	0.0261649	0.902828	DKO_2 - WT	no hit
Abca5	Q8K448	ATP-binding cassette sub-family A member 5 OS=Mus musculus GN=Abca5 PE=1 SV=2	3	2	-0.25518	0.0422417	0.262222	(DKO_1 - WT) - (DKO_2 - WT)	no hit
Fundc2	Q9D6K8	FUN14 domain-containing protein 2 OS=Mus musculus GN=Fundc2 PE=1 SV=1	3	2	-0.255146	0.0598052	0.308242	(DKO_1 - WT) - (DKO_2 - WT)	no hit
Sqle	P52019|Q3TQK8	Squalene monooxygenase OS=Mus musculus GN=Sqle PE=2 SV=1|Squalene epoxidase OS=Mus musculus GN=Sqle PE=1 SV=1	3	2	-0.255051	0.0332981	0.227446	DKO_1 - WT	no hit
Tmem59	Q9QY73	Transmembrane protein 59 OS=Mus musculus GN=Tmem59 PE=1 SV=2	3	2	-0.255023	0.0660892	0.970122	DKO_2 - WT	no hit
Pinx1	Q9CZX5	PIN2/TERF1-interacting telomerase inhibitor 1 OS=Mus musculus GN=Pinx1 PE=1 SV=2	3	2	-0.254596	0.0551638	0.291552	DKO_1 - WT	no hit
Rexo4	A2ALB2|Q6PAQ4	RNA exonuclease 4 OS=Mus musculus GN=Rexo4 PE=1 SV=1|RNA exonuclease 4 OS=Mus musculus GN=Rexo4 PE=2 SV=2	3	2	-0.254542	0.0370738	0.247172	(DKO_1 - WT) - (DKO_2 - WT)	no hit
Pdp2	Q504M2	MCG53395 OS=Mus musculus GN=Pdp2 PE=1 SV=1	3	2	-0.254489	0.0341417	0.239544	(DKO_1 - WT) - (DKO_2 - WT)	no hit
Bckdhb	Q6P3A8|Q6P3A8-2	2-oxoisovalerate dehydrogenase subunit beta, mitochondrial OS=Mus musculus GN=Bckdhb PE=1 SV=2|Isoform 2 of 2-oxoisovalerate dehydrogenase subunit beta, mitochondrial OS=Mus musculus GN=Bckdhb	3	2	-0.25448	0.0465008	0.268991	DKO_1 - WT	no hit
Fam207a	P58468	Protein FAM207A OS=Mus musculus GN=Fam207a PE=1 SV=1	3	2	-0.254324	0.0538871	0.96119	DKO_2 - WT	no hit
Myof	E9Q390|Q69ZN7|Q69ZN7-4	Myoferlin OS=Mus musculus GN=Myof PE=1 SV=2|Myoferlin OS=Mus musculus GN=Myof PE=1 SV=2|Isoform 4 of Myoferlin OS=Mus musculus GN=Myof	3	2	-0.254251	0.0306905	0.21854	DKO_1 - WT	no hit
Gm20390	E9PZF0	Nucleoside diphosphate kinase OS=Mus musculus GN=Gm20390 PE=3 SV=1	3	2	-0.254239	0.0695401	0.974338	DKO_2 - WT	no hit
Lamc1	F8VQJ3|P02468	Laminin subunit gamma-1 OS=Mus musculus GN=Lamc1 PE=1 SV=1|Laminin subunit gamma-1 OS=Mus musculus GN=Lamc1 PE=1 SV=2	3	2	-0.254157	0.0405815	0.96119	DKO_2 - WT	no hit
Fat4	Q2PZL6	Protocadherin Fat 4 OS=Mus musculus GN=Fat4 PE=1 SV=2	3	2	-0.254003	0.0392487	0.245418	DKO_1 - WT	no hit
Nid2	O88322	Nidogen-2 OS=Mus musculus GN=Nid2 PE=1 SV=2	3	2	-0.253951	0.0360139	0.235945	DKO_1 - WT	no hit
Fech	P22315|Q544X6	Ferrochelatase, mitochondrial OS=Mus musculus GN=Fech PE=1 SV=2|Ferrochelatase OS=Mus musculus GN=Fech PE=1 SV=1	3	2	-0.253709	0.0268264	0.204013	DKO_1 - WT	no hit
Bace1	P56818	Beta-secretase 1 OS=Mus musculus GN=Bace1 PE=1 SV=2	3	2	-0.253664	0.0288056	0.219838	(DKO_1 - WT) - (DKO_2 - WT)	no hit
Pag1	A6H659|Q3U1F9	Pag1 protein OS=Mus musculus GN=Pag1 PE=1 SV=1|Phosphoprotein associated with glycosphingolipid-enriched microdomains 1 OS=Mus musculus GN=Pag1 PE=1 SV=2	3	2	-0.2536	0.0928251	0.369125	DKO_1 - WT	no hit
Mcfd2	D0EW11|Q8K5B2	Multiple coagulation factor deficiency 2 isoform 1 OS=Mus musculus GN=Mcfd2 PE=1 SV=1|Multiple coagulation factor deficiency protein 2 homolog OS=Mus musculus GN=Mcfd2 PE=1 SV=1	3	2	-0.253291	0.10333	0.405752	(DKO_1 - WT) - (DKO_2 - WT)	no hit
Nras	A0A0G2JGP4|P08556|Q9D091	GTPase NRas (Fragment) OS=Mus musculus GN=Nras PE=1 SV=1|GTPase NRas OS=Mus musculus GN=Nras PE=1 SV=1|GTPase NRas OS=Mus musculus GN=Nras PE=1 SV=1	3	2	-0.253124	0.0569179	0.301409	(DKO_1 - WT) - (DKO_2 - WT)	no hit
Tagln	P37804	Transgelin OS=Mus musculus GN=Tagln PE=1 SV=3	3	2	-0.253089	0.0455426	0.265202	DKO_1 - WT	no hit
Igf2	E9QLW5|P09535	Insulin-like growth factor II OS=Mus musculus GN=Igf2 PE=1 SV=1|Insulin-like growth factor II OS=Mus musculus GN=Igf2 PE=1 SV=1	3	2	-0.253009	0.138194	0.440308	DKO_1 - WT	no hit
Hcfc2	G5E837	Host cell factor 2 OS=Mus musculus GN=Hcfc2 PE=1 SV=1	3	2	-0.252974	0.0695296	0.325659	DKO_1 - WT	no hit
Ssrp1	Q08943|Q08943-2	FACT complex subunit SSRP1 OS=Mus musculus GN=Ssrp1 PE=1 SV=2|Isoform 2 of FACT complex subunit SSRP1 OS=Mus musculus GN=Ssrp1	3	2	-0.252925	0.0456291	0.96119	DKO_2 - WT	no hit
Mmaa	Q8C7H1	Methylmalonic aciduria type A homolog, mitochondrial OS=Mus musculus GN=Mmaa PE=1 SV=1	3	2	-0.252518	0.0333847	0.23735	(DKO_1 - WT) - (DKO_2 - WT)	no hit
Slc8a1	G3X9J1|G5E8Y0|Q68FL0	Sodium/calcium exchanger 1 OS=Mus musculus GN=Slc8a1 PE=1 SV=1|Sodium/calcium exchanger 1 OS=Mus musculus GN=Slc8a1 PE=1 SV=2|Slc8a1 protein OS=Mus musculus GN=Slc8a1 PE=1 SV=1	3	2	-0.252421	0.038425	0.243463	DKO_1 - WT	no hit
Nudt16l1	Q8VHN8	Protein syndesmos OS=Mus musculus GN=Nudt16l1 PE=1 SV=2	3	2	-0.252408	0.0407827	0.96119	DKO_2 - WT	no hit
Npat	Q8BMA5	Protein NPAT OS=Mus musculus GN=Npat PE=1 SV=2	3	2	-0.25238	0.0665537	0.317156	DKO_1 - WT	no hit
Khdrbs2	Q9WU01	KH domain-containing, RNA-binding, signal transduction-associated protein 2 OS=Mus musculus GN=Khdrbs2 PE=1 SV=1	3	2	-0.252351	0.0538117	0.96119	DKO_2 - WT	no hit
Nefl	P08551	Neurofilament light polypeptide OS=Mus musculus GN=Nefl PE=1 SV=5	3	2	-0.25226	0.0278357	0.214454	(DKO_1 - WT) - (DKO_2 - WT)	no hit
Sfn	O70456	14-3-3 protein sigma OS=Mus musculus GN=Sfn PE=1 SV=2	3	2	-0.252256	0.102091	0.999773	DKO_2 - WT	no hit
Ndfip1	Q8R0W6	NEDD4 family-interacting protein 1 OS=Mus musculus GN=Ndfip1 PE=1 SV=1	3	2	-0.252224	0.0457464	0.26615	DKO_1 - WT	no hit
Mettl1	Q9Z120	tRNA (guanine-N(7)-)-methyltransferase OS=Mus musculus GN=Mettl1 PE=1 SV=1	3	2	-0.252171	0.0631228	0.314499	(DKO_1 - WT) - (DKO_2 - WT)	no hit
Hdlbp	Q3U4Z7|Q8VDJ3	High density lipoprotein (HDL) binding protein, isoform CRA_d OS=Mus musculus GN=Hdlbp PE=1 SV=1|Vigilin OS=Mus musculus GN=Hdlbp PE=1 SV=1	3	2	-0.252143	0.0280876	0.20895	DKO_1 - WT	no hit
Derl1	Q99J56	Derlin-1 OS=Mus musculus GN=Derl1 PE=1 SV=1	3	2	-0.252139	0.0432621	0.258894	DKO_1 - WT	no hit
Nop14	Q8R3N1	Nucleolar protein 14 OS=Mus musculus GN=Nop14 PE=1 SV=2	3	2	-0.251917	0.0322615	0.22455	DKO_1 - WT	no hit
Acadl	A0A0R4J083|P51174	Long-chain-specific acyl-CoA dehydrogenase, mitochondrial OS=Mus musculus GN=Acadl PE=1 SV=1|Long-chain specific acyl-CoA dehydrogenase, mitochondrial OS=Mus musculus GN=Acadl PE=1 SV=2	3	2	-0.251917	0.0283851	0.209085	DKO_1 - WT	no hit
Snap23	A2AKH4|O09044|Q9D3L3	Synaptosomal-associated protein OS=Mus musculus GN=Snap23 PE=1 SV=1|Synaptosomal-associated protein 23 OS=Mus musculus GN=Snap23 PE=1 SV=1|Synaptosomal-associated protein OS=Mus musculus GN=Snap23 PE=1 SV=1	3	2	-0.25181	0.040897	0.96119	DKO_2 - WT	no hit
Slc39a6	Q8C145	Zinc transporter ZIP6 OS=Mus musculus GN=Slc39a6 PE=1 SV=1	3	2	-0.251696	0.0495339	0.281264	(DKO_1 - WT) - (DKO_2 - WT)	no hit
Tnfrsf21	Q9EPU5	Tumor necrosis factor receptor superfamily member 21 OS=Mus musculus GN=Tnfrsf21 PE=1 SV=2	3	2	-0.251602	0.0653811	0.970122	DKO_2 - WT	no hit
Tspan9	A0A0J9YTS4|D3YXN7|Q8BJU2	Tetraspanin (Fragment) OS=Mus musculus GN=Tspan9 PE=1 SV=1|Tetraspanin (Fragment) OS=Mus musculus GN=Tspan9 PE=1 SV=1|Tetraspanin-9 OS=Mus musculus GN=Tspan9 PE=1 SV=1	3	2	-0.251593	0.0704666	0.327939	DKO_1 - WT	no hit
Cadm1	E9PYN1|Q8R5M8|Q8R5M8-2|Q8R5M8-3|Q8R5M8-4	Cell adhesion molecule 1 OS=Mus musculus GN=Cadm1 PE=1 SV=1|Cell adhesion molecule 1 OS=Mus musculus GN=Cadm1 PE=1 SV=2|Isoform 2 of Cell adhesion molecule 1 OS=Mus musculus GN=Cadm1|Isoform 3 of Cell adhesion molecule 1 OS=Mus musculus GN=Cadm1|Isoform 4 of Cell adhesion molecule 1 OS=Mus musculus GN=Cadm1	3	2	-0.251576	0.0843964	0.369261	(DKO_1 - WT) - (DKO_2 - WT)	no hit
Palm2	Q8BR92	Paralemmin-2 OS=Mus musculus GN=Palm2 PE=1 SV=1	3	2	-0.251142	0.0525465	0.287654	(DKO_1 - WT) - (DKO_2 - WT)	no hit
Fam20c	Q5MJS3	Extracellular serine/threonine protein kinase FAM20C OS=Mus musculus GN=Fam20c PE=1 SV=1	3	2	-0.251054	0.0358855	0.242995	(DKO_1 - WT) - (DKO_2 - WT)	no hit
Alkbh1	P0CB42	DNA demethylase ALKBH1 OS=Mus musculus GN=Alkbh1 PE=1 SV=1	3	2	-0.251047	0.0312355	0.229473	(DKO_1 - WT) - (DKO_2 - WT)	no hit
Cd248	Q91V98	Endosialin OS=Mus musculus GN=Cd248 PE=1 SV=1	3	2	-0.251043	0.0579138	0.963731	DKO_2 - WT	no hit
Upf3b	Q3ULL6	Protein Upf3b OS=Mus musculus GN=Upf3b PE=1 SV=1	3	2	-0.250925	0.0348817	0.240629	(DKO_1 - WT) - (DKO_2 - WT)	no hit
Stmn4	D3Z4C2|G3X9Z6|P63042|Q05DI3	Stathmin-4 OS=Mus musculus GN=Stmn4 PE=1 SV=1|Stathmin-4 OS=Mus musculus GN=Stmn4 PE=1 SV=1|Stathmin-4 OS=Mus musculus GN=Stmn4 PE=2 SV=1|Stathmin OS=Mus musculus GN=Stmn4 PE=1 SV=1	3	2	-0.25092	0.0388745	0.253888	(DKO_1 - WT) - (DKO_2 - WT)	no hit
Kifc3	A0A0R4J220|E9PWU7|O35231|O35231-2	Kinesin-like protein OS=Mus musculus GN=Kifc3 PE=1 SV=1|Kinesin-like protein OS=Mus musculus GN=Kifc3 PE=1 SV=1|Kinesin-like protein KIFC3 OS=Mus musculus GN=Kifc3 PE=1 SV=4|Isoform 2 of Kinesin-like protein KIFC3 OS=Mus musculus GN=Kifc3	3	2	-0.250863	0.0319896	0.232122	(DKO_1 - WT) - (DKO_2 - WT)	no hit
Sec62	Q8BU14	Translocation protein SEC62 OS=Mus musculus GN=Sec62 PE=1 SV=1	3	2	-0.250835	0.0586897	0.298168	DKO_1 - WT	no hit
Enpep	P16406|Q52JJ6	Glutamyl aminopeptidase OS=Mus musculus GN=Enpep PE=1 SV=1|Aminopeptidase A OS=Mus musculus GN=Enpep PE=1 SV=1	3	2	-0.250817	0.0769337	0.98049	DKO_2 - WT	no hit
Rrbp1	A2AVJ7|Q99PL5	Ribosome-binding protein 1 OS=Mus musculus GN=Rrbp1 PE=1 SV=1|Ribosome-binding protein 1 OS=Mus musculus GN=Rrbp1 PE=1 SV=2	3	2	-0.250723	0.0424403	0.26245	(DKO_1 - WT) - (DKO_2 - WT)	no hit
Gpatch11	A0A0R4J215|Q3UFS4	G patch domain-containing protein 11 OS=Mus musculus GN=Gpatch11 PE=1 SV=1|G patch domain-containing protein 11 OS=Mus musculus GN=Gpatch11 PE=1 SV=2	3	2	-0.250719	0.0349367	0.232684	DKO_1 - WT	no hit
Arnt2	Q61324|Q61324-2	Aryl hydrocarbon receptor nuclear translocator 2 OS=Mus musculus GN=Arnt2 PE=1 SV=2|Isoform 2 of Aryl hydrocarbon receptor nuclear translocator 2 OS=Mus musculus GN=Arnt2	3	2	-0.250684	0.0286727	0.219081	(DKO_1 - WT) - (DKO_2 - WT)	no hit
Dnajc8	A2ALF2|Q6NZB0	DnaJ (Hsp40) homolog, subfamily C, member 8 OS=Mus musculus GN=Dnajc8 PE=1 SV=1|DnaJ homolog subfamily C member 8 OS=Mus musculus GN=Dnajc8 PE=1 SV=2	3	2	-0.250566	0.0361385	0.236083	DKO_1 - WT	no hit
Wasf2	Q8BH43	Wiskott-Aldrich syndrome protein family member 2 OS=Mus musculus GN=Wasf2 PE=1 SV=1	3	2	-0.250288	0.0292403	0.933257	DKO_2 - WT	no hit
Oaf	Q8QZR4	Out at first protein homolog OS=Mus musculus GN=Oaf PE=2 SV=1	3	2	-0.250179	0.0393167	0.255181	(DKO_1 - WT) - (DKO_2 - WT)	no hit
Hmg20a	Q9DC33	High mobility group protein 20A OS=Mus musculus GN=Hmg20a PE=1 SV=1	3	2	-0.250145	0.121435	0.999773	DKO_2 - WT	no hit
Arhgef40	Q3UPH7|Q3UPH7-2|Q3UPH7-3|Q3UPH7-6|S4R189	Rho guanine nucleotide exchange factor 40 OS=Mus musculus GN=Arhgef40 PE=1 SV=1|Isoform 2 of Rho guanine nucleotide exchange factor 40 OS=Mus musculus GN=Arhgef40|Isoform 3 of Rho guanine nucleotide exchange factor 40 OS=Mus musculus GN=Arhgef40|Isoform 6 of Rho guanine nucleotide exchange factor 40 OS=Mus musculus GN=Arhgef40|Rho guanine nucleotide exchange factor 40 OS=Mus musculus GN=Arhgef40 …	3	2	-0.250133	0.0312725	0.229485	(DKO_1 - WT) - (DKO_2 - WT)	no hit
Sntb2	Q542S9|Q61235	Beta-2-syntrophin OS=Mus musculus GN=Sntb2 PE=1 SV=1|Beta-2-syntrophin OS=Mus musculus GN=Sntb2 PE=1 SV=2	3	2	-0.249856	0.0473922	0.274976	(DKO_1 - WT) - (DKO_2 - WT)	no hit
Ros1	E9PWG5|Q78DX7	Proto-oncogene tyrosine-protein kinase ROS OS=Mus musculus GN=Ros1 PE=3 SV=1|Proto-oncogene tyrosine-protein kinase ROS OS=Mus musculus GN=Ros1 PE=1 SV=1	3	2	-0.249782	0.0811816	0.360949	(DKO_1 - WT) - (DKO_2 - WT)	no hit
Cntnap1	O54991	Contactin-associated protein 1 OS=Mus musculus GN=Cntnap1 PE=1 SV=2	3	2	-0.249669	0.0337269	0.238482	(DKO_1 - WT) - (DKO_2 - WT)	no hit
Mis12	Q9CY25	Protein MIS12 homolog OS=Mus musculus GN=Mis12 PE=2 SV=1	3	2	-0.249573	0.0359756	0.235945	DKO_1 - WT	no hit
Sema6a	D3YWM8|K3W4S5|O35464|O35464-2|O35464-3	Semaphorin-6A OS=Mus musculus GN=Sema6a PE=1 SV=1|Semaphorin-6A OS=Mus musculus GN=Sema6a PE=1 SV=1|Semaphorin-6A OS=Mus musculus GN=Sema6a PE=1 SV=2|Isoform 2 of Semaphorin-6A OS=Mus musculus GN=Sema6a|Isoform 3 of Semaphorin-6A OS=Mus musculus GN=Sema6a	3	2	-0.249553	0.0501079	0.28294	(DKO_1 - WT) - (DKO_2 - WT)	no hit
Dcun1d5	Q9CXV9	DCN1-like protein 5 OS=Mus musculus GN=Dcun1d5 PE=1 SV=1	3	2	-0.249498	0.0396513	0.256193	(DKO_1 - WT) - (DKO_2 - WT)	no hit
Pomgnt1	Q91X88|Q91X88-2|Q91X88-3	Protein O-linked-mannose beta-1,2-N-acetylglucosaminyltransferase 1 OS=Mus musculus GN=Pomgnt1 PE=2 SV=1|Isoform 2 of Protein O-linked-mannose beta-1,2-N-acetylglucosaminyltransferase 1 OS=Mus musculus GN=Pomgnt1|Isoform 3 of Protein O-linked-mannose beta-1,2-N-acetylglucosaminyltransferase 1 OS=Mus musculus GN=Pomgnt1	3	2	-0.249459	0.0316427	0.230727	(DKO_1 - WT) - (DKO_2 - WT)	no hit
Eif6	O55135|Q545K4	Eukaryotic translation initiation factor 6 OS=Mus musculus GN=Eif6 PE=1 SV=2|Eukaryotic translation initiation factor 6 OS=Mus musculus GN=Eif6 PE=1 SV=1	3	2	-0.249401	0.0408146	0.259319	(DKO_1 - WT) - (DKO_2 - WT)	no hit
Lactb	B2RWI2|Q9EP89	Lactamase, beta OS=Mus musculus GN=Lactb PE=1 SV=1|Serine beta-lactamase-like protein LACTB, mitochondrial OS=Mus musculus GN=Lactb PE=1 SV=1	3	2	-0.249266	0.0541315	0.289729	DKO_1 - WT	no hit
Tnpo2	Q99LG2	Transportin-2 OS=Mus musculus GN=Tnpo2 PE=1 SV=1	3	2	-0.249262	0.0656752	0.314776	DKO_1 - WT	no hit
Plod2	E9Q718	Procollagen-lysine,2-oxoglutarate 5-dioxygenase 2 OS=Mus musculus GN=Plod2 PE=1 SV=1	3	2	-0.24917	0.0297092	0.214854	DKO_1 - WT	no hit
Pik3c2a	F8VPL2|Q61194	Phosphatidylinositol 4-phosphate 3-kinase C2 domain-containing subunit alpha OS=Mus musculus GN=Pik3c2a PE=1 SV=1|Phosphatidylinositol 4-phosphate 3-kinase C2 domain-containing subunit alpha OS=Mus musculus GN=Pik3c2a PE=1 SV=2	3	2	-0.249122	0.0791757	0.343784	DKO_1 - WT	no hit
Dgcr2|Gm20518	A0A0R4J1M6|E9Q548|E9QNU3|P98154|Q6P5A9	DiGeorge syndrome critical region gene 2, isoform CRA_c OS=Mus musculus GN=Dgcr2 PE=4 SV=1|Protein Gm20518 OS=Mus musculus GN=Gm20518 PE=4 SV=1|Integral membrane protein DGCR2/IDD OS=Mus musculus GN=Dgcr2 PE=4 SV=1|Integral membrane protein DGCR2/IDD OS=Mus musculus GN=Dgcr2 PE=2 SV=1|DiGeorge syndrome critical region gene 2 OS=Mus musculus GN=Dgcr2 PE=2 SV=1	3	2	-0.249115	0.0499143	0.28294	(DKO_1 - WT) - (DKO_2 - WT)	no hit
Fam114a1	Q9D281	Protein Noxp20 OS=Mus musculus GN=Fam114a1 PE=1 SV=1	3	2	-0.24898	0.0358588	0.242995	(DKO_1 - WT) - (DKO_2 - WT)	no hit
Smurf2	A2A5Z6|A2A5Z6-2	E3 ubiquitin-protein ligase SMURF2 OS=Mus musculus GN=Smurf2 PE=1 SV=1|Isoform 2 of E3 ubiquitin-protein ligase SMURF2 OS=Mus musculus GN=Smurf2	3	2	-0.248915	0.101948	0.403008	(DKO_1 - WT) - (DKO_2 - WT)	no hit
Srp9	D3YZX8|P49962|Q5EAT0	Signal recognition particle 9 kDa protein OS=Mus musculus GN=Srp9 PE=1 SV=1|Signal recognition particle 9 kDa protein OS=Mus musculus GN=Srp9 PE=1 SV=2|Signal recognition particle 9 kDa protein OS=Mus musculus GN=Srp9 PE=1 SV=1	3	2	-0.248563	0.063247	0.308716	DKO_1 - WT	no hit
Cetn2	Q9R1K9	Centrin-2 OS=Mus musculus GN=Cetn2 PE=1 SV=1	3	2	-0.24856	0.0299866	0.216618	DKO_1 - WT	no hit
Hmox1	P14901|Q3U5U6	Heme oxygenase 1 OS=Mus musculus GN=Hmox1 PE=1 SV=1|Heme oxygenase 1 OS=Mus musculus GN=Hmox1 PE=1 SV=1	3	2	-0.248533	0.0408964	0.96119	DKO_2 - WT	no hit
Chpf2	Q3UU43	MCG16489, isoform CRA_a OS=Mus musculus GN=Chpf2 PE=1 SV=1	3	2	-0.248438	0.0469955	0.274154	(DKO_1 - WT) - (DKO_2 - WT)	no hit
Esrp1	F8WGU3|Q3US41|Q3US41-2|Q3US41-3|Q3US41-4|Q3US41-5|Z4YJI3|Z4YMQ5	Epithelial-splicing regulatory protein 1 OS=Mus musculus GN=Esrp1 PE=1 SV=1|Epithelial splicing regulatory protein 1 OS=Mus musculus GN=Esrp1 PE=1 SV=2|Isoform 2 of Epithelial splicing regulatory protein 1 OS=Mus musculus GN=Esrp1|Isoform 3 of Epithelial splicing regulatory protein 1 OS=Mus musculus GN=Esrp1|Isoform 4 of Epithelial splicing regulatory protein 1 OS=Mus musculus GN=Esrp1|Isoform 5 …	3	2	-0.248415	0.0561098	0.962425	DKO_2 - WT	no hit
Adamts17	D3YX90|E9Q4D1	Protein Adamts17 OS=Mus musculus GN=Adamts17 PE=1 SV=1|Protein Adamts17 OS=Mus musculus GN=Adamts17 PE=1 SV=1	3	2	-0.248303	0.0942596	0.37107	DKO_1 - WT	no hit
Scn3a	A2ASI5	Protein Scn3a OS=Mus musculus GN=Scn3a PE=1 SV=1	3	2	-0.248287	0.125619	0.422223	DKO_1 - WT	no hit
Mtif2	Q91YJ5	Translation initiation factor IF-2, mitochondrial OS=Mus musculus GN=Mtif2 PE=1 SV=2	3	2	-0.248243	0.0345556	0.231812	DKO_1 - WT	no hit
Rsrp1	Q3UC65|Q3UC65-2|Q3UC65-3	Arginine/serine-rich protein 1 OS=Mus musculus GN=Rsrp1 PE=1 SV=1|Isoform 2 of Arginine/serine-rich protein 1 OS=Mus musculus GN=Rsrp1|Isoform 3 of Arginine/serine-rich protein 1 OS=Mus musculus GN=Rsrp1	3	2	-0.24806	0.042911	0.258222	DKO_1 - WT	no hit
Ggt7	Q99JP7	Gamma-glutamyltransferase 7 OS=Mus musculus GN=Ggt7 PE=1 SV=2	3	2	-0.24796	0.0299007	0.933257	DKO_2 - WT	no hit
Tspyl4	Q8VD63	Testis-specific Y-encoded-like protein 4 OS=Mus musculus GN=Tspyl4 PE=1 SV=1	3	2	-0.247839	0.0334438	0.23735	(DKO_1 - WT) - (DKO_2 - WT)	no hit
Kif5a	P33175	Kinesin heavy chain isoform 5A OS=Mus musculus GN=Kif5a PE=1 SV=3	3	2	-0.247738	0.0358176	0.235409	DKO_1 - WT	no hit
Pkp4	A2AS45|Q68FH0|Q68FH0-2	Plakophilin-4 OS=Mus musculus GN=Pkp4 PE=1 SV=1|Plakophilin-4 OS=Mus musculus GN=Pkp4 PE=1 SV=1|Isoform 2 of Plakophilin-4 OS=Mus musculus GN=Pkp4	3	2	-0.247734	0.0615672	0.311957	(DKO_1 - WT) - (DKO_2 - WT)	no hit
Ldlr	P35951	Low-density lipoprotein receptor OS=Mus musculus GN=Ldlr PE=1 SV=2	3	2	-0.247644	0.0448891	0.263049	DKO_1 - WT	no hit
Mtmr12	Q80TA6|Q80TA6-2	Myotubularin-related protein 12 OS=Mus musculus GN=Mtmr12 PE=1 SV=2|Isoform 2 of Myotubularin-related protein 12 OS=Mus musculus GN=Mtmr12	3	2	-0.247515	0.0461104	0.271926	(DKO_1 - WT) - (DKO_2 - WT)	no hit
Ptpmt1	Q66GT5	Phosphatidylglycerophosphatase and protein-tyrosine phosphatase 1 OS=Mus musculus GN=Ptpmt1 PE=1 SV=1	3	2	-0.24732	0.0758253	0.338294	DKO_1 - WT	no hit
Pid1	Q3UBG2|Q3UBG2-2	PTB-containing, cubilin and LRP1-interacting protein OS=Mus musculus GN=Pid1 PE=1 SV=2|Isoform 2 of PTB-containing, cubilin and LRP1-interacting protein OS=Mus musculus GN=Pid1	3	2	-0.247288	0.0640471	0.311575	DKO_1 - WT	no hit
Oma1	Q9D8H7	Metalloendopeptidase OMA1, mitochondrial OS=Mus musculus GN=Oma1 PE=1 SV=1	3	2	-0.247253	0.0351169	0.241062	(DKO_1 - WT) - (DKO_2 - WT)	no hit
Nt5m	Q8VCE6	5'(3')-deoxyribonucleotidase, mitochondrial OS=Mus musculus GN=Nt5m PE=1 SV=1	3	2	-0.247163	0.0485341	0.278442	(DKO_1 - WT) - (DKO_2 - WT)	no hit
Sfxn2	Q3UC14|Q925N2	Sideroflexin OS=Mus musculus GN=Sfxn2 PE=1 SV=1|Sideroflexin-2 OS=Mus musculus GN=Sfxn2 PE=1 SV=1	3	2	-0.247022	0.0494769	0.276211	DKO_1 - WT	no hit
Tppp3	Q9CRB6	Tubulin polymerization-promoting protein family member 3 OS=Mus musculus GN=Tppp3 PE=1 SV=1	3	2	-0.247009	0.0731962	0.332124	DKO_1 - WT	no hit
Gnb4	P29387	Guanine nucleotide-binding protein subunit beta-4 OS=Mus musculus GN=Gnb4 PE=1 SV=4	3	2	-0.246909	0.148199	0.452621	DKO_1 - WT	no hit
Rab2b	P59279|Q0PD64	Ras-related protein Rab-2B OS=Mus musculus GN=Rab2b PE=1 SV=1|RAB2B, member RAS oncogene family, isoform CRA_a OS=Mus musculus GN=Rab2b PE=1 SV=1	3	2	-0.246857	0.0448094	0.26282	DKO_1 - WT	no hit
Fat4	Q2PZL6	Protocadherin Fat 4 OS=Mus musculus GN=Fat4 PE=1 SV=2	3	2	-0.246835	0.0440279	0.96119	DKO_2 - WT	no hit
Dlgap5	A0A0R4J0G7|E9QQ48|Q8K4R9|Q8K4R9-2|Q8K4R9-3	Disks large-associated protein 5 OS=Mus musculus GN=Dlgap5 PE=1 SV=1|Disks large-associated protein 5 (Fragment) OS=Mus musculus GN=Dlgap5 PE=1 SV=2|Disks large-associated protein 5 OS=Mus musculus GN=Dlgap5 PE=1 SV=2|Isoform 2 of Disks large-associated protein 5 OS=Mus musculus GN=Dlgap5|Isoform 3 of Disks large-associated protein 5 OS=Mus musculus GN=Dlgap5	3	2	-0.246663	0.0355321	0.234901	DKO_1 - WT	no hit
Dnm2	G3X9G4|P39054|Q3T9X3|Q3TCR7	Dynamin-2 OS=Mus musculus GN=Dnm2 PE=1 SV=1|Dynamin-2 OS=Mus musculus GN=Dnm2 PE=1 SV=2|Dynamin-2 OS=Mus musculus GN=Dnm2 PE=1 SV=1|Dynamin-2 OS=Mus musculus GN=Dnm2 PE=1 SV=1	3	2	-0.246651	0.0495088	0.281264	(DKO_1 - WT) - (DKO_2 - WT)	no hit
Rtf1	A2AQ19	RNA polymerase-associated protein RTF1 homolog OS=Mus musculus GN=Rtf1 PE=1 SV=1	3	2	-0.246613	0.045598	0.27132	(DKO_1 - WT) - (DKO_2 - WT)	no hit
Tmem181a	Q3U3W2	Protein Tmem181a OS=Mus musculus GN=Tmem181a PE=1 SV=1	3	2	-0.246606	0.0476718	0.271508	DKO_1 - WT	no hit
Chsy1	Q6ZQ11	Chondroitin sulfate synthase 1 OS=Mus musculus GN=Chsy1 PE=2 SV=2	3	2	-0.246391	0.0595641	0.300853	DKO_1 - WT	no hit
Rrm2	P11157	Ribonucleoside-diphosphate reductase subunit M2 OS=Mus musculus GN=Rrm2 PE=1 SV=1	3	2	-0.246314	0.0414954	0.253606	DKO_1 - WT	no hit
Hs1bp3	Q3TC93	HCLS1-binding protein 3 OS=Mus musculus GN=Hs1bp3 PE=1 SV=2	3	2	-0.246268	0.0632682	0.308716	DKO_1 - WT	no hit
Cyth3	G5E8Q4|O08967|Q3TXK1	Cytohesin-3 OS=Mus musculus GN=Cyth3 PE=1 SV=1|Cytohesin-3 OS=Mus musculus GN=Cyth3 PE=1 SV=1|Cytohesin-3 OS=Mus musculus GN=Cyth3 PE=1 SV=1	3	2	-0.246094	0.0467437	0.273177	(DKO_1 - WT) - (DKO_2 - WT)	no hit
Ankfy1	Q810B6	Rabankyrin-5 OS=Mus musculus GN=Ankfy1 PE=1 SV=2	3	2	-0.246031	0.062935	0.307656	DKO_1 - WT	no hit
Phax	G5E8V8|Q9JJT9	Phosphorylated adapter RNA export protein OS=Mus musculus GN=Phax PE=1 SV=1|Phosphorylated adapter RNA export protein OS=Mus musculus GN=Phax PE=1 SV=1	3	2	-0.245787	0.114874	0.40675	DKO_1 - WT	no hit
Abcc5	Q9R1X5	Multidrug resistance-associated protein 5 OS=Mus musculus GN=Abcc5 PE=1 SV=2	3	2	-0.24577	0.0580997	0.303456	(DKO_1 - WT) - (DKO_2 - WT)	no hit
Lamp5	Q9D387	Lysosome-associated membrane glycoprotein 5 OS=Mus musculus GN=Lamp5 PE=1 SV=2	3	2	-0.245722	0.0652568	0.970122	DKO_2 - WT	no hit
Tmem132a	Q922P8	Transmembrane protein 132A OS=Mus musculus GN=Tmem132a PE=1 SV=2	3	2	-0.245714	0.0648185	0.313188	DKO_1 - WT	no hit
Lifr	P42703	Leukemia inhibitory factor receptor OS=Mus musculus GN=Lifr PE=1 SV=1	3	2	-0.245708	0.0666428	0.325047	(DKO_1 - WT) - (DKO_2 - WT)	no hit
Sv2c	A2RSH4|Q69ZS6	Sv2c protein OS=Mus musculus GN=Sv2c PE=1 SV=1|Synaptic vesicle glycoprotein 2C OS=Mus musculus GN=Sv2c PE=1 SV=2	3	2	-0.245661	0.0355232	0.241804	(DKO_1 - WT) - (DKO_2 - WT)	no hit
Mdn1	A2ANY6	Protein Mdn1 OS=Mus musculus GN=Mdn1 PE=1 SV=1	3	2	-0.245654	0.0337268	0.952351	DKO_2 - WT	no hit
Apoe	P08226|Q3TXU4	Apolipoprotein E OS=Mus musculus GN=Apoe PE=1 SV=2|Apolipoprotein E OS=Mus musculus GN=Apoe PE=1 SV=1	3	2	-0.24557	0.0575912	0.296739	DKO_1 - WT	no hit
Cdh11	P55288	Cadherin-11 OS=Mus musculus GN=Cdh11 PE=1 SV=1	3	2	-0.245558	0.0614833	0.965486	DKO_2 - WT	no hit
Sfr1	Q8BP27|Q8BP27-2	Swi5-dependent recombination DNA repair protein 1 homolog OS=Mus musculus GN=Sfr1 PE=1 SV=2|Isoform 2 of Swi5-dependent recombination DNA repair protein 1 homolog OS=Mus musculus GN=Sfr1	3	2	-0.245397	0.0797888	0.358547	(DKO_1 - WT) - (DKO_2 - WT)	no hit
Phf23	B0QZH9|Q8BSN5	PHD finger protein 23 (Fragment) OS=Mus musculus GN=Phf23 PE=1 SV=1|PHD finger protein 23 OS=Mus musculus GN=Phf23 PE=2 SV=2	3	2	-0.245279	0.0642644	0.965486	DKO_2 - WT	no hit
Mki67	E9PVX6	Protein Mki67 OS=Mus musculus GN=Mki67 PE=1 SV=1	3	2	-0.245257	0.0310924	0.220193	DKO_1 - WT	no hit
Fbxo30	Q8BJL1	F-box only protein 30 OS=Mus musculus GN=Fbxo30 PE=1 SV=2	3	2	-0.245227	0.0510211	0.284436	(DKO_1 - WT) - (DKO_2 - WT)	no hit
Puf60	Q3UEB3-2	Isoform 2 of Poly(U)-binding-splicing factor PUF60 OS=Mus musculus GN=Puf60	3	2	-0.245191	0.0422491	0.96119	DKO_2 - WT	no hit
Stx4	P70452	Syntaxin-4 OS=Mus musculus GN=Stx4 PE=1 SV=1	3	2	-0.245174	0.0586222	0.304713	(DKO_1 - WT) - (DKO_2 - WT)	no hit
Tspan9	A0A0J9YTS4|D3YXN7|Q8BJU2	Tetraspanin (Fragment) OS=Mus musculus GN=Tspan9 PE=1 SV=1|Tetraspanin (Fragment) OS=Mus musculus GN=Tspan9 PE=1 SV=1|Tetraspanin-9 OS=Mus musculus GN=Tspan9 PE=1 SV=1	3	2	-0.245124	0.0768902	0.98049	DKO_2 - WT	no hit
Flrt3	Q8BGT1	Leucine-rich repeat transmembrane protein FLRT3 OS=Mus musculus GN=Flrt3 PE=1 SV=1	3	2	-0.244985	0.0555241	0.291648	DKO_1 - WT	no hit
Osbpl10	S4R1M9	Oxysterol-binding protein-related protein 10 OS=Mus musculus GN=Osbpl10 PE=1 SV=1	3	2	-0.244935	0.0405321	0.250016	DKO_1 - WT	no hit
Abhd14a	E9Q136	Protein ABHD14A OS=Mus musculus GN=Abhd14a PE=1 SV=1	3	2	-0.244866	0.0361582	0.243613	(DKO_1 - WT) - (DKO_2 - WT)	no hit
BC037034	E9Q2V5	Protein BC037034 OS=Mus musculus GN=BC037034 PE=1 SV=1	3	2	-0.244721	0.0421178	0.261954	(DKO_1 - WT) - (DKO_2 - WT)	no hit
Actg1	P63260|Q4KL81	Actin, cytoplasmic 2 OS=Mus musculus GN=Actg1 PE=1 SV=1|Actin, cytoplasmic 2 OS=Mus musculus GN=Actg1 PE=1 SV=1	3	2	-0.244712	0.0328725	0.23487	(DKO_1 - WT) - (DKO_2 - WT)	no hit
Pphln1	Q8K2H1|Q8K2H1-2	Periphilin-1 OS=Mus musculus GN=Pphln1 PE=1 SV=1|Isoform 2 of Periphilin-1 OS=Mus musculus GN=Pphln1	3	2	-0.244591	0.0498093	0.277112	DKO_1 - WT	no hit
Stam2	O88811|O88811-2	Signal transducing adapter molecule 2 OS=Mus musculus GN=Stam2 PE=1 SV=1|Isoform 2 of Signal transducing adapter molecule 2 OS=Mus musculus GN=Stam2	3	2	-0.24455	0.0536065	0.287869	DKO_1 - WT	no hit
Clint1	Q5SUH6|Q5SUH7	Clathrin interactor 1 OS=Mus musculus GN=Clint1 PE=1 SV=1|Clathrin interactor 1 OS=Mus musculus GN=Clint1 PE=1 SV=1	3	2	-0.244523	0.0508391	0.284305	(DKO_1 - WT) - (DKO_2 - WT)	no hit
Mdk	P12025	Midkine OS=Mus musculus GN=Mdk PE=2 SV=2	3	2	-0.244519	0.162558	0.471818	DKO_1 - WT	no hit
Mphosph8	Q3TYA6	M-phase phosphoprotein 8 OS=Mus musculus GN=Mphosph8 PE=1 SV=1	3	2	-0.244502	0.0595955	0.300853	DKO_1 - WT	no hit
Lmtk2	Q3TYD6	Serine/threonine-protein kinase LMTK2 OS=Mus musculus GN=Lmtk2 PE=1 SV=3	3	2	-0.244453	0.0568064	0.295039	DKO_1 - WT	no hit
Usp31	E9Q6Y8	Protein Usp31 OS=Mus musculus GN=Usp31 PE=1 SV=1	3	2	-0.244239	0.033289	0.237132	(DKO_1 - WT) - (DKO_2 - WT)	no hit
Klhl29	Q80T74	Kelch-like protein 29 OS=Mus musculus GN=Klhl29 PE=2 SV=3	3	2	-0.244179	0.0342579	0.239574	(DKO_1 - WT) - (DKO_2 - WT)	no hit
Palm2	Q8BR92	Paralemmin-2 OS=Mus musculus GN=Palm2 PE=1 SV=1	3	2	-0.2441	0.0583557	0.297349	DKO_1 - WT	no hit
Sept11	A0A0J9YTY0|A0A0J9YUL3|Q8C1B7|Q8C1B7-2|Q8C1B7-3	Septin-11 OS=Mus musculus GN=Sept11 PE=1 SV=1|Septin 11, isoform CRA_b OS=Mus musculus GN=Sept11 PE=1 SV=1|Septin-11 OS=Mus musculus GN=Sept11 PE=1 SV=4|Isoform 2 of Septin-11 OS=Mus musculus GN=Sept11|Isoform 3 of Septin-11 OS=Mus musculus GN=Sept11	3	2	-0.243939	0.0622286	0.312673	(DKO_1 - WT) - (DKO_2 - WT)	no hit
Tmem130	Q6NXM3	Transmembrane protein 130 OS=Mus musculus GN=Tmem130 PE=2 SV=1	3	2	-0.243907	0.0361071	0.243613	(DKO_1 - WT) - (DKO_2 - WT)	no hit
Alyref	O08583	THO complex subunit 4 OS=Mus musculus GN=Alyref PE=1 SV=3	3	2	-0.243877	0.0343729	0.960437	DKO_2 - WT	no hit
Ssu72	Q9CY97|Q9CY97-2	RNA polymerase II subunit A C-terminal domain phosphatase SSU72 OS=Mus musculus GN=Ssu72 PE=1 SV=1|Isoform 2 of RNA polymerase II subunit A C-terminal domain phosphatase SSU72 OS=Mus musculus GN=Ssu72	3	2	-0.2438	0.0897873	0.381045	(DKO_1 - WT) - (DKO_2 - WT)	no hit
Gja1	P23242	Gap junction alpha-1 protein OS=Mus musculus GN=Gja1 PE=1 SV=2	3	2	-0.243605	0.0539915	0.289218	DKO_1 - WT	no hit
Arhgef12	F8VQN6|Q8R4H2	Rho guanine nucleotide exchange factor 12 OS=Mus musculus GN=Arhgef12 PE=1 SV=1|Rho guanine nucleotide exchange factor 12 OS=Mus musculus GN=Arhgef12 PE=1 SV=2	3	2	-0.243586	0.0462997	0.272299	(DKO_1 - WT) - (DKO_2 - WT)	no hit
Cpne3	Q8BT60	Copine-3 OS=Mus musculus GN=Cpne3 PE=1 SV=2	3	2	-0.243167	0.0394343	0.245735	DKO_1 - WT	no hit
Rab28	Q3TWY9|Q99KL7	Rab28 OS=Mus musculus GN=Rab28 PE=1 SV=1|Ras-related protein Rab-28 OS=Mus musculus GN=Rab28 PE=1 SV=1	3	2	-0.243095	0.0933078	0.386272	(DKO_1 - WT) - (DKO_2 - WT)	no hit
Cd3eap	Q76KJ5	DNA-directed RNA polymerase I subunit RPA34 OS=Mus musculus GN=Cd3eap PE=1 SV=2	3	2	-0.243078	0.0389681	0.24479	DKO_1 - WT	no hit
Mdga1	D3Z499|E9PY95|F7ABV5|Q0PMG2	MAM domain-containing glycosylphosphatidylinositol anchor protein 1 OS=Mus musculus GN=Mdga1 PE=1 SV=1|MAM domain-containing glycosylphosphatidylinositol anchor protein 1 OS=Mus musculus GN=Mdga1 PE=1 SV=1|MAM domain-containing glycosylphosphatidylinositol anchor protein 1 (Fragment) OS=Mus musculus GN=Mdga1 PE=1 SV=1|MAM domain-containing glycosylphosphatidylinositol anchor protein 1 OS=Mus musc…	3	2	-0.243054	0.0341572	0.239544	(DKO_1 - WT) - (DKO_2 - WT)	no hit
Bckdhb	Q6P3A8|Q6P3A8-2	2-oxoisovalerate dehydrogenase subunit beta, mitochondrial OS=Mus musculus GN=Bckdhb PE=1 SV=2|Isoform 2 of 2-oxoisovalerate dehydrogenase subunit beta, mitochondrial OS=Mus musculus GN=Bckdhb	3	2	-0.243006	0.0553786	0.296159	(DKO_1 - WT) - (DKO_2 - WT)	no hit
Tsc22d1	P62500-2	Isoform 2 of TSC22 domain family protein 1 OS=Mus musculus GN=Tsc22d1	3	2	-0.242641	0.0462445	0.272221	(DKO_1 - WT) - (DKO_2 - WT)	no hit
Mcam	Q8R2Y2	Cell surface glycoprotein MUC18 OS=Mus musculus GN=Mcam PE=1 SV=1	3	2	-0.242589	0.0645254	0.965486	DKO_2 - WT	no hit
Ankib1	Q6ZPS6	Ankyrin repeat and IBR domain-containing protein 1 OS=Mus musculus GN=Ankib1 PE=1 SV=2	3	2	-0.242525	0.033095	0.226942	DKO_1 - WT	no hit
Scaf11	E9PZM7	Protein Scaf11 OS=Mus musculus GN=Scaf11 PE=1 SV=1	3	2	-0.242489	0.0790547	0.343784	DKO_1 - WT	no hit
Egfr	Q01279	Epidermal growth factor receptor OS=Mus musculus GN=Egfr PE=1 SV=1	3	2	-0.242471	0.0333247	0.227446	DKO_1 - WT	no hit
Derl2	Q8BNI4|Q8BNI4-2	Derlin-2 OS=Mus musculus GN=Derl2 PE=1 SV=2|Isoform 2 of Derlin-2 OS=Mus musculus GN=Derl2	3	2	-0.242065	0.0618345	0.311957	(DKO_1 - WT) - (DKO_2 - WT)	no hit
Cisd3	B1AR13|B2RWE3|Z4YKM2	CDGSH iron-sulfur domain-containing protein 3, mitochondrial OS=Mus musculus GN=Cisd3 PE=1 SV=1|CDGSH iron sulfur domain 3 OS=Mus musculus GN=Cisd3 PE=1 SV=1|CDGSH iron-sulfur domain-containing protein 3, mitochondrial OS=Mus musculus GN=Cisd3 PE=1 SV=1	3	2	-0.242022	0.0340333	0.229708	DKO_1 - WT	no hit
Dag1	Q544G5|Q62165	Dystroglycan OS=Mus musculus GN=Dag1 PE=1 SV=1|Dystroglycan OS=Mus musculus GN=Dag1 PE=1 SV=4	3	2	-0.242015	0.0474309	0.270737	DKO_1 - WT	no hit
Ano10	Q8BH79	Anoctamin-10 OS=Mus musculus GN=Ano10 PE=1 SV=1	3	2	-0.241888	0.0475506	0.274976	(DKO_1 - WT) - (DKO_2 - WT)	no hit
Ptcd2	Q8R3K3	Pentatricopeptide repeat-containing protein 2, mitochondrial OS=Mus musculus GN=Ptcd2 PE=1 SV=1	3	2	-0.241815	0.0357537	0.242941	(DKO_1 - WT) - (DKO_2 - WT)	no hit
Wwc2	Q6NXJ0	Protein WWC2 OS=Mus musculus GN=Wwc2 PE=1 SV=1	3	2	-0.241774	0.0622742	0.312673	(DKO_1 - WT) - (DKO_2 - WT)	no hit
Sema6a	D3YWM8|K3W4S5|O35464|O35464-2|O35464-3	Semaphorin-6A OS=Mus musculus GN=Sema6a PE=1 SV=1|Semaphorin-6A OS=Mus musculus GN=Sema6a PE=1 SV=1|Semaphorin-6A OS=Mus musculus GN=Sema6a PE=1 SV=2|Isoform 2 of Semaphorin-6A OS=Mus musculus GN=Sema6a|Isoform 3 of Semaphorin-6A OS=Mus musculus GN=Sema6a	3	2	-0.24163	0.0565218	0.293985	DKO_1 - WT	no hit
Alas1	A0A0R4J0X2|Q3V0B2|Q8VC19	5-aminolevulinate synthase OS=Mus musculus GN=Alas1 PE=1 SV=1|5-aminolevulinate synthase OS=Mus musculus GN=Alas1 PE=1 SV=1|5-aminolevulinate synthase, nonspecific, mitochondrial OS=Mus musculus GN=Alas1 PE=1 SV=2	3	2	-0.241606	0.0523199	0.284016	DKO_1 - WT	no hit
Psmg1	D3Z795|Q9JK23	Proteasome assembly chaperone 1 OS=Mus musculus GN=Psmg1 PE=1 SV=1|Proteasome assembly chaperone 1 OS=Mus musculus GN=Psmg1 PE=1 SV=1	3	2	-0.241265	0.0464131	0.272604	(DKO_1 - WT) - (DKO_2 - WT)	no hit
Adgre5|Cd97	A0A0D9SEG8|E9QJS7|E9QMJ5|Q9DC42|Q9Z0M6|Q9Z0M6-2|Q9Z0M6-3	Protein Adgre5 OS=Mus musculus GN=Adgre5 PE=1 SV=1|Protein Adgre5 OS=Mus musculus GN=Adgre5 PE=1 SV=1|Protein Adgre5 OS=Mus musculus GN=Adgre5 PE=1 SV=1|Protein Adgre5 OS=Mus musculus GN=Adgre5 PE=1 SV=1|CD97 antigen OS=Mus musculus GN=Cd97 PE=1 SV=2|Isoform 2 of CD97 antigen OS=Mus musculus GN=Cd97|Isoform 3 of CD97 antigen OS=Mus musculus GN=Cd97	3	2	-0.241263	0.0393509	0.96119	DKO_2 - WT	no hit
Stim1	P70302	Stromal interaction molecule 1 OS=Mus musculus GN=Stim1 PE=1 SV=2	3	2	-0.241198	0.0627645	0.307286	DKO_1 - WT	no hit
Fbn1	Q61554	Fibrillin-1 OS=Mus musculus GN=Fbn1 PE=1 SV=2	3	2	-0.241033	0.0539899	0.291706	(DKO_1 - WT) - (DKO_2 - WT)	no hit
Pdp2	Q504M2	MCG53395 OS=Mus musculus GN=Pdp2 PE=1 SV=1	3	2	-0.24096	0.0427287	0.258083	DKO_1 - WT	no hit
Ttc9c	Q810A3	Tetratricopeptide repeat protein 9C OS=Mus musculus GN=Ttc9c PE=1 SV=1	3	2	-0.240904	0.0628902	0.314064	(DKO_1 - WT) - (DKO_2 - WT)	no hit
Sh3bgrl3	Q91VW3	SH3 domain-binding glutamic acid-rich-like protein 3 OS=Mus musculus GN=Sh3bgrl3 PE=1 SV=1	3	2	-0.240651	0.04588	0.27178	(DKO_1 - WT) - (DKO_2 - WT)	no hit
Nolc1	E9Q5C9	Protein Nolc1 OS=Mus musculus GN=Nolc1 PE=1 SV=1	3	2	-0.240316	0.0355502	0.234901	DKO_1 - WT	no hit
Kif5a	P33175	Kinesin heavy chain isoform 5A OS=Mus musculus GN=Kif5a PE=1 SV=3	3	2	-0.240207	0.0406615	0.259107	(DKO_1 - WT) - (DKO_2 - WT)	no hit
Anxa4	P97429	Annexin A4 OS=Mus musculus GN=Anxa4 PE=1 SV=4	3	2	-0.240179	0.0359173	0.961174	DKO_2 - WT	no hit
Sorcs2	Q9EPR5	VPS10 domain-containing receptor SorCS2 OS=Mus musculus GN=Sorcs2 PE=1 SV=2	3	2	-0.240169	0.0534202	0.289504	(DKO_1 - WT) - (DKO_2 - WT)	no hit
Snip1	Q8BIZ6	Smad nuclear-interacting protein 1 OS=Mus musculus GN=Snip1 PE=1 SV=1	3	2	-0.240049	0.0762575	0.977633	DKO_2 - WT	no hit
Slc1a5	Q9ESU7	Neutral amino acid transporter ASCT2 OS=Mus musculus GN=Slc1a5 PE=1 SV=1	3	2	-0.240044	0.0586592	0.963731	DKO_2 - WT	no hit
Cthrc1	Q9D1D6	Collagen triple helix repeat-containing protein 1 OS=Mus musculus GN=Cthrc1 PE=2 SV=2	3	2	-0.240005	0.0851686	0.353645	DKO_1 - WT	no hit
Mrm3	Q5ND52	rRNA methyltransferase 3, mitochondrial OS=Mus musculus GN=Mrm3 PE=2 SV=1	3	2	-0.239921	0.038029	0.250451	(DKO_1 - WT) - (DKO_2 - WT)	no hit
Snip1	Q8BIZ6	Smad nuclear-interacting protein 1 OS=Mus musculus GN=Snip1 PE=1 SV=1	3	2	-0.239821	0.0764974	0.340356	DKO_1 - WT	no hit
Sec14l1	A8Y5H7|A8Y5H7-2|A8Y5H7-3	SEC14-like protein 1 OS=Mus musculus GN=Sec14l1 PE=1 SV=1|Isoform 2 of SEC14-like protein 1 OS=Mus musculus GN=Sec14l1|Isoform 3 of SEC14-like protein 1 OS=Mus musculus GN=Sec14l1	3	2	-0.239758	0.0350644	0.233067	DKO_1 - WT	no hit
Epb41l2	O70318	Band 4.1-like protein 2 OS=Mus musculus GN=Epb41l2 PE=1 SV=2	3	2	-0.239744	0.0408018	0.96119	DKO_2 - WT	no hit
Mdga1	D3Z499|E9PY95|F7ABV5|Q0PMG2	MAM domain-containing glycosylphosphatidylinositol anchor protein 1 OS=Mus musculus GN=Mdga1 PE=1 SV=1|MAM domain-containing glycosylphosphatidylinositol anchor protein 1 OS=Mus musculus GN=Mdga1 PE=1 SV=1|MAM domain-containing glycosylphosphatidylinositol anchor protein 1 (Fragment) OS=Mus musculus GN=Mdga1 PE=1 SV=1|MAM domain-containing glycosylphosphatidylinositol anchor protein 1 OS=Mus musc…	3	2	-0.239452	0.0363656	0.236647	DKO_1 - WT	no hit
Nol8	E9QKD1|Q3UHX0	Nucleolar protein 8 OS=Mus musculus GN=Nol8 PE=1 SV=1|Nucleolar protein 8 OS=Mus musculus GN=Nol8 PE=1 SV=2	3	2	-0.239431	0.0418223	0.254504	DKO_1 - WT	no hit
Pomt1	Q8R2R1	Protein O-mannosyl-transferase 1 OS=Mus musculus GN=Pomt1 PE=1 SV=1	3	2	-0.23938	0.0470401	0.274168	(DKO_1 - WT) - (DKO_2 - WT)	no hit
Cdon	Q32MD9	Cell adhesion molecule-related/down-regulated by oncogenes OS=Mus musculus GN=Cdon PE=1 SV=2	3	2	-0.239313	0.041146	0.252282	DKO_1 - WT	no hit
Triobp	Q99KW3|Q99KW3-2|Q99KW3-4	TRIO and F-actin-binding protein OS=Mus musculus GN=Triobp PE=1 SV=3|Isoform 2 of TRIO and F-actin-binding protein OS=Mus musculus GN=Triobp|Isoform 4 of TRIO and F-actin-binding protein OS=Mus musculus GN=Triobp	3	2	-0.239286	0.0363972	0.244419	(DKO_1 - WT) - (DKO_2 - WT)	no hit
Fkrp	Q8CG64	Fukutin-related protein OS=Mus musculus GN=Fkrp PE=1 SV=1	3	2	-0.23926	0.0425546	0.258025	DKO_1 - WT	no hit
Tmem132a	Q922P8	Transmembrane protein 132A OS=Mus musculus GN=Tmem132a PE=1 SV=2	3	2	-0.239252	0.0710555	0.337309	(DKO_1 - WT) - (DKO_2 - WT)	no hit
Ddr2	Q62371	Discoidin domain-containing receptor 2 OS=Mus musculus GN=Ddr2 PE=1 SV=2	3	2	-0.23914	0.0895145	0.999773	DKO_2 - WT	no hit
Ufsp2	Q99K23	Ufm1-specific protease 2 OS=Mus musculus GN=Ufsp2 PE=1 SV=1	3	2	-0.239106	0.0449564	0.270039	(DKO_1 - WT) - (DKO_2 - WT)	no hit
Tax1bp1	Q3UKC1	Tax1-binding protein 1 homolog OS=Mus musculus GN=Tax1bp1 PE=1 SV=2	3	2	-0.239033	0.0938696	0.387744	(DKO_1 - WT) - (DKO_2 - WT)	no hit
Bud13	Q8R149	BUD13 homolog OS=Mus musculus GN=Bud13 PE=1 SV=1	3	2	-0.238958	0.0640366	0.965486	DKO_2 - WT	no hit
Rc3h2	A2AVP4|P0C090	Roquin-2 OS=Mus musculus GN=Rc3h2 PE=1 SV=1|Roquin-2 OS=Mus musculus GN=Rc3h2 PE=1 SV=1	3	2	-0.238804	0.0462209	0.272221	(DKO_1 - WT) - (DKO_2 - WT)	no hit
Gnai2	P08752	Guanine nucleotide-binding protein G(i) subunit alpha-2 OS=Mus musculus GN=Gnai2 PE=1 SV=5	3	2	-0.238734	0.0361533	0.961174	DKO_2 - WT	no hit
Lrp8	B1AXJ3|B1AXJ4|Q924X6|Q924X6-2	Low-density lipoprotein receptor-related protein 8 OS=Mus musculus GN=Lrp8 PE=1 SV=1|Low-density lipoprotein receptor-related protein 8 OS=Mus musculus GN=Lrp8 PE=1 SV=1|Low-density lipoprotein receptor-related protein 8 OS=Mus musculus GN=Lrp8 PE=1 SV=2|Isoform 2 of Low-density lipoprotein receptor-related protein 8 OS=Mus musculus GN=Lrp8	3	2	-0.23873	0.036202	0.243613	(DKO_1 - WT) - (DKO_2 - WT)	no hit
Wars2	Q9CYK1	Tryptophan--tRNA ligase, mitochondrial OS=Mus musculus GN=Wars2 PE=1 SV=2	3	2	-0.238663	0.0356574	0.235071	DKO_1 - WT	no hit
Pfdn5	E9PVG3|E9PZ62|Q9WU28	Prefoldin subunit 5 OS=Mus musculus GN=Pfdn5 PE=1 SV=1|Prefoldin subunit 5 OS=Mus musculus GN=Pfdn5 PE=1 SV=1|Prefoldin subunit 5 OS=Mus musculus GN=Pfdn5 PE=1 SV=1	3	2	-0.238609	0.0366066	0.24525	(DKO_1 - WT) - (DKO_2 - WT)	no hit
Naxe	Q8K4Z3	NAD(P)H-hydrate epimerase OS=Mus musculus GN=Naxe PE=1 SV=1	3	2	-0.238544	0.0379415	0.250234	(DKO_1 - WT) - (DKO_2 - WT)	no hit
Q8CFE2	Q8CFE2	UPF0609 protein C4orf27 homolog OS=Mus musculus PE=1 SV=1	3	2	-0.238457	0.0519317	0.286389	(DKO_1 - WT) - (DKO_2 - WT)	no hit
Bhlhb9	Q6PB60	Protein BHLHb9 OS=Mus musculus GN=Bhlhb9 PE=2 SV=1	3	2	-0.238388	0.0562462	0.293572	DKO_1 - WT	no hit
Slc7a6os	Q7TPE5	Probable RNA polymerase II nuclear localization protein SLC7A6OS OS=Mus musculus GN=Slc7a6os PE=1 SV=1	3	2	-0.238182	0.0386384	0.243743	DKO_1 - WT	no hit
Rbmxl1	Q91VM5	RNA binding motif protein, X-linked-like-1 OS=Mus musculus GN=Rbmxl1 PE=2 SV=1	3	2	-0.23809	0.185554	0.999773	DKO_2 - WT	no hit
Ssr1	Q9CY50	Translocon-associated protein subunit alpha OS=Mus musculus GN=Ssr1 PE=1 SV=1	3	2	-0.238074	0.0595092	0.963731	DKO_2 - WT	no hit
Mme	Q61391	Neprilysin OS=Mus musculus GN=Mme PE=1 SV=3	3	2	-0.238045	0.0529222	0.28833	(DKO_1 - WT) - (DKO_2 - WT)	no hit
Fam171a2	A2A699	Protein FAM171A2 OS=Mus musculus GN=Fam171a2 PE=1 SV=1	3	2	-0.237985	0.0848677	0.370126	(DKO_1 - WT) - (DKO_2 - WT)	no hit
Mvp	E9Q3X0|Q9EQK5	Major vault protein OS=Mus musculus GN=Mvp PE=1 SV=1|Major vault protein OS=Mus musculus GN=Mvp PE=1 SV=4	3	2	-0.237983	0.0441918	0.96119	DKO_2 - WT	no hit
Emb	P21995	Embigin OS=Mus musculus GN=Emb PE=1 SV=2	3	2	-0.237962	0.0531831	0.96119	DKO_2 - WT	no hit
Tor1aip1	Q921T2|Q921T2-2	Torsin-1A-interacting protein 1 OS=Mus musculus GN=Tor1aip1 PE=1 SV=3|Isoform 2 of Torsin-1A-interacting protein 1 OS=Mus musculus GN=Tor1aip1	3	2	-0.237858	0.0532977	0.287216	DKO_1 - WT	no hit
Gltp	D3Z1H8|D3Z1H9|Q9JL62	Glycolipid transfer protein OS=Mus musculus GN=Gltp PE=1 SV=1|Glycolipid transfer protein OS=Mus musculus GN=Gltp PE=1 SV=1|Glycolipid transfer protein OS=Mus musculus GN=Gltp PE=1 SV=3	3	2	-0.237759	0.0379574	0.250234	(DKO_1 - WT) - (DKO_2 - WT)	no hit
Ptpn13	G5E8B1|Q64512	Protein tyrosine phosphatase, non-receptor type 13 OS=Mus musculus GN=Ptpn13 PE=1 SV=1|Tyrosine-protein phosphatase non-receptor type 13 OS=Mus musculus GN=Ptpn13 PE=1 SV=2	3	2	-0.237432	0.0733247	0.332395	DKO_1 - WT	no hit
Abcc5	Q9R1X5	Multidrug resistance-associated protein 5 OS=Mus musculus GN=Abcc5 PE=1 SV=2	3	2	-0.237422	0.0657016	0.314776	DKO_1 - WT	no hit
Ston2	E9PXP7|Q8BZ60	Stonin-2 OS=Mus musculus GN=Ston2 PE=1 SV=1|Stonin-2 OS=Mus musculus GN=Ston2 PE=1 SV=1	3	2	-0.237273	0.0502909	0.96119	DKO_2 - WT	no hit
Bace1	P56818	Beta-secretase 1 OS=Mus musculus GN=Bace1 PE=1 SV=2	3	2	-0.237225	0.0383185	0.243463	DKO_1 - WT	no hit
Cdh6	P97326	Cadherin-6 OS=Mus musculus GN=Cdh6 PE=1 SV=2	3	2	-0.237125	0.0494312	0.281264	(DKO_1 - WT) - (DKO_2 - WT)	no hit
Fbxo41	Q3UGY7|Q6NS60	F-box only protein 41 OS=Mus musculus GN=Fbxo41 PE=1 SV=1|F-box only protein 41 OS=Mus musculus GN=Fbxo41 PE=1 SV=3	3	2	-0.237085	0.0466984	0.273177	(DKO_1 - WT) - (DKO_2 - WT)	no hit
Wwp2	I3RSH5|Q9DBH0	E3 ubiquitin-protein ligase OS=Mus musculus GN=Wwp2 PE=1 SV=1|NEDD4-like E3 ubiquitin-protein ligase WWP2 OS=Mus musculus GN=Wwp2 PE=1 SV=1	3	2	-0.237085	0.0368616	0.238406	DKO_1 - WT	no hit
Slit2	A0A140T8T2|G3UYX7	Slit homolog 2 protein OS=Mus musculus GN=Slit2 PE=1 SV=1|Slit homolog 2 protein OS=Mus musculus GN=Slit2 PE=1 SV=1	3	2	-0.236994	0.0785808	0.343784	DKO_1 - WT	no hit
Jade1	Q6ZPI0	Protein Jade-1 OS=Mus musculus GN=Jade1 PE=1 SV=2	3	2	-0.236912	0.0499081	0.96119	DKO_2 - WT	no hit
Fzd2	Q9JIP6	Frizzled-2 OS=Mus musculus GN=Fzd2 PE=2 SV=1	3	2	-0.236827	0.0797866	0.358547	(DKO_1 - WT) - (DKO_2 - WT)	no hit
Ppm1h	Q3UYC0|Q3UYC0-2	Protein phosphatase 1H OS=Mus musculus GN=Ppm1h PE=1 SV=1|Isoform 2 of Protein phosphatase 1H OS=Mus musculus GN=Ppm1h	3	2	-0.236575	0.0586101	0.304713	(DKO_1 - WT) - (DKO_2 - WT)	no hit
Bpnt1	Q9Z0S1	3'(2'),5'-bisphosphate nucleotidase 1 OS=Mus musculus GN=Bpnt1 PE=1 SV=2	3	2	-0.236552	0.181842	0.494388	DKO_1 - WT	no hit
Mrps28	Q9CY16	28S ribosomal protein S28, mitochondrial OS=Mus musculus GN=Mrps28 PE=1 SV=1	3	2	-0.236394	0.0467809	0.269749	DKO_1 - WT	no hit
Lpp	Q8BFW7	Lipoma-preferred partner homolog OS=Mus musculus GN=Lpp PE=1 SV=1	3	2	-0.236312	0.141379	0.999773	DKO_2 - WT	no hit
Clip3	B9EHT4	CAP-Gly domain-containing linker protein 3 OS=Mus musculus GN=Clip3 PE=1 SV=1	3	2	-0.23623	0.0509673	0.284436	(DKO_1 - WT) - (DKO_2 - WT)	no hit
Fbn2	Q61555	Fibrillin-2 OS=Mus musculus GN=Fbn2 PE=1 SV=2	3	2	-0.23623	0.0520452	0.96119	DKO_2 - WT	no hit
Ddr1	Q03146	Epithelial discoidin domain-containing receptor 1 OS=Mus musculus GN=Ddr1 PE=2 SV=2	3	2	-0.23594	0.0563725	0.293725	DKO_1 - WT	no hit
Myt1	B0R0C1|Q8CFC2	Myelin transcription factor 1 OS=Mus musculus GN=Myt1 PE=1 SV=1|Myelin transcription factor 1 OS=Mus musculus GN=Myt1 PE=1 SV=1	3	2	-0.235819	0.0933537	0.999773	DKO_2 - WT	no hit
Sacs	E9QNY8|Q9JLC8|Q9JLC8-3	Sacsin OS=Mus musculus GN=Sacs PE=1 SV=1|Sacsin OS=Mus musculus GN=Sacs PE=1 SV=2|Isoform 3 of Sacsin OS=Mus musculus GN=Sacs	3	2	-0.235755	0.0609863	0.310289	(DKO_1 - WT) - (DKO_2 - WT)	no hit
Tm7sf3	A0A0R4J0K4|Q9CRG1	Transmembrane 7 superfamily member 3 OS=Mus musculus GN=Tm7sf3 PE=1 SV=1|Transmembrane 7 superfamily member 3 OS=Mus musculus GN=Tm7sf3 PE=2 SV=2	3	2	-0.235727	0.104873	0.408103	(DKO_1 - WT) - (DKO_2 - WT)	no hit
Hars	Q61035	Histidine--tRNA ligase, cytoplasmic OS=Mus musculus GN=Hars PE=1 SV=2	3	2	-0.235673	0.112305	0.40339	DKO_1 - WT	no hit
Lgr4	A2ARI4|A2ARI4-2	Leucine-rich repeat-containing G-protein coupled receptor 4 OS=Mus musculus GN=Lgr4 PE=1 SV=1|Isoform 2 of Leucine-rich repeat-containing G-protein coupled receptor 4 OS=Mus musculus GN=Lgr4	3	2	-0.235631	0.0487187	0.96119	DKO_2 - WT	no hit
Ublcp1	Q8BGR9	Ubiquitin-like domain-containing CTD phosphatase 1 OS=Mus musculus GN=Ublcp1 PE=1 SV=1	3	2	-0.235183	0.173197	0.485214	DKO_1 - WT	no hit
Fndc3b	A0A0R4J0H8|Q6NWW9	Fibronectin type III domain-containing protein 3B OS=Mus musculus GN=Fndc3b PE=1 SV=1|Fibronectin type III domain-containing protein 3B OS=Mus musculus GN=Fndc3b PE=1 SV=1	3	2	-0.234997	0.0442468	0.267004	(DKO_1 - WT) - (DKO_2 - WT)	no hit
Itih2	G3X977|Q3UEG7|Q61703	Inter-alpha trypsin inhibitor, heavy chain 2 OS=Mus musculus GN=Itih2 PE=1 SV=1|Inter-alpha-trypsin inhibitor heavy chain H2 (Fragment) OS=Mus musculus GN=Itih2 PE=1 SV=1|Inter-alpha-trypsin inhibitor heavy chain H2 OS=Mus musculus GN=Itih2 PE=1 SV=1	3	2	-0.234986	0.0478958	0.96119	DKO_2 - WT	no hit
Wdr89	Q9D0R9	WD repeat-containing protein 89 OS=Mus musculus GN=Wdr89 PE=2 SV=1	3	2	-0.234912	0.0924159	0.384893	(DKO_1 - WT) - (DKO_2 - WT)	no hit
Hunk	O88866	Hormonally up-regulated neu tumor-associated kinase OS=Mus musculus GN=Hunk PE=2 SV=1	3	2	-0.234895	0.0575841	0.302241	(DKO_1 - WT) - (DKO_2 - WT)	no hit
Pdcd6	P12815|P12815-2	Programmed cell death protein 6 OS=Mus musculus GN=Pdcd6 PE=1 SV=2|Isoform 2 of Programmed cell death protein 6 OS=Mus musculus GN=Pdcd6	3	2	-0.23476	0.0894502	0.999773	DKO_2 - WT	no hit
Acap2	Q6ZQK5|Q6ZQK5-2	Arf-GAP with coiled-coil, ANK repeat and PH domain-containing protein 2 OS=Mus musculus GN=Acap2 PE=1 SV=2|Isoform 2 of Arf-GAP with coiled-coil, ANK repeat and PH domain-containing protein 2 OS=Mus musculus GN=Acap2	3	2	-0.234684	0.0399471	0.25708	(DKO_1 - WT) - (DKO_2 - WT)	no hit
Ube2e3	P52483	Ubiquitin-conjugating enzyme E2 E3 OS=Mus musculus GN=Ube2e3 PE=1 SV=2	3	2	-0.234664	0.128507	0.44803	(DKO_1 - WT) - (DKO_2 - WT)	no hit
Grhpr	Q3T9Z2|Q91Z53	Glyoxylate reductase/hydroxypyruvate reductase OS=Mus musculus GN=Grhpr PE=1 SV=1|Glyoxylate reductase/hydroxypyruvate reductase OS=Mus musculus GN=Grhpr PE=1 SV=1	3	2	-0.234638	0.0878686	0.359327	DKO_1 - WT	no hit
Arfgap3	A0A0R4J0T8	ADP-ribosylation factor GTPase-activating protein 3 OS=Mus musculus GN=Arfgap3 PE=1 SV=1	3	2	-0.234522	0.0745652	0.335591	DKO_1 - WT	no hit
Pdlim7	Q3TJD7	PDZ and LIM domain protein 7 OS=Mus musculus GN=Pdlim7 PE=1 SV=1	3	2	-0.234509	0.0472045	0.96119	DKO_2 - WT	no hit
Paf	Q9CQX4	PCNA-associated factor OS=Mus musculus GN=Paf PE=1 SV=1	3	2	-0.234445	0.0380037	0.96119	DKO_2 - WT	no hit
Tuba4a	A0A0A0MQA5|P68368	Tubulin alpha-4A chain (Fragment) OS=Mus musculus GN=Tuba4a PE=1 SV=1|Tubulin alpha-4A chain OS=Mus musculus GN=Tuba4a PE=1 SV=1	3	2	-0.234418	0.078069	0.985355	DKO_2 - WT	no hit
Sesn3	Q9CYP7	Sestrin-3 OS=Mus musculus GN=Sesn3 PE=1 SV=1	3	2	-0.234376	0.0906944	0.382035	(DKO_1 - WT) - (DKO_2 - WT)	no hit
Arhgap10	Q6Y5D8|Q6Y5D8-2|Q6Y5D8-3	Rho GTPase-activating protein 10 OS=Mus musculus GN=Arhgap10 PE=1 SV=2|Isoform 2 of Rho GTPase-activating protein 10 OS=Mus musculus GN=Arhgap10|Isoform 3 of Rho GTPase-activating protein 10 OS=Mus musculus GN=Arhgap10	3	2	-0.234287	0.0386637	0.243743	DKO_1 - WT	no hit
Camk2g	Q923T9-2|Q923T9-3	Isoform 2 of Calcium/calmodulin-dependent protein kinase type II subunit gamma OS=Mus musculus GN=Camk2g|Isoform 3 of Calcium/calmodulin-dependent protein kinase type II subunit gamma OS=Mus musculus GN=Camk2g	3	2	-0.234283	0.0501547	0.28294	(DKO_1 - WT) - (DKO_2 - WT)	no hit
Npm3	Q9CPP0	Nucleoplasmin-3 OS=Mus musculus GN=Npm3 PE=1 SV=3	3	2	-0.234248	0.0407904	0.251289	DKO_1 - WT	no hit
Arl6	O88848|O88848-2	ADP-ribosylation factor-like protein 6 OS=Mus musculus GN=Arl6 PE=1 SV=1|Isoform 2 of ADP-ribosylation factor-like protein 6 OS=Mus musculus GN=Arl6	3	2	-0.233961	0.0437383	0.265651	(DKO_1 - WT) - (DKO_2 - WT)	no hit
Slc7a3	P70423	Cationic amino acid transporter 3 OS=Mus musculus GN=Slc7a3 PE=2 SV=1	3	2	-0.233931	0.0727596	0.977137	DKO_2 - WT	no hit
Rsrp1	Q3UC65|Q3UC65-2|Q3UC65-3	Arginine/serine-rich protein 1 OS=Mus musculus GN=Rsrp1 PE=1 SV=1|Isoform 2 of Arginine/serine-rich protein 1 OS=Mus musculus GN=Rsrp1|Isoform 3 of Arginine/serine-rich protein 1 OS=Mus musculus GN=Rsrp1	3	2	-0.233732	0.0539495	0.96119	DKO_2 - WT	no hit
Topors	Q80Z37	E3 ubiquitin-protein ligase Topors OS=Mus musculus GN=Topors PE=1 SV=1	3	2	-0.233707	0.118707	0.431777	(DKO_1 - WT) - (DKO_2 - WT)	no hit
Slc7a6os	Q7TPE5	Probable RNA polymerase II nuclear localization protein SLC7A6OS OS=Mus musculus GN=Slc7a6os PE=1 SV=1	3	2	-0.233692	0.0417365	0.261301	(DKO_1 - WT) - (DKO_2 - WT)	no hit
Tmed7	D3YZZ5	Protein Tmed7 OS=Mus musculus GN=Tmed7 PE=1 SV=1	3	2	-0.233193	0.0552002	0.295692	(DKO_1 - WT) - (DKO_2 - WT)	no hit
Slc7a1	Q09143|Q3UGD6	High affinity cationic amino acid transporter 1 OS=Mus musculus GN=Slc7a1 PE=1 SV=1|High affinity cationic amino acid transporter 1 OS=Mus musculus GN=Slc7a1 PE=1 SV=1	3	2	-0.233193	0.0580668	0.296832	DKO_1 - WT	no hit
Hoxc4	Q08624	Homeobox protein Hox-C4 OS=Mus musculus GN=Hoxc4 PE=2 SV=1	3	2	-0.23317	0.0465192	0.272604	(DKO_1 - WT) - (DKO_2 - WT)	no hit
Cul7	Q8VE73|Q8VE73-3	Cullin-7 OS=Mus musculus GN=Cul7 PE=1 SV=2|Isoform 2 of Cullin-7 OS=Mus musculus GN=Cul7	3	2	-0.23311	0.0429898	0.258433	DKO_1 - WT	no hit
Ythdf3	Q8BYK6|Q8BYK6-2|Q8BYK6-3	YTH domain-containing family protein 3 OS=Mus musculus GN=Ythdf3 PE=1 SV=2|Isoform 2 of YTH domain-containing family protein 3 OS=Mus musculus GN=Ythdf3|Isoform 3 of YTH domain-containing family protein 3 OS=Mus musculus GN=Ythdf3	3	2	-0.233078	0.0738013	0.333856	DKO_1 - WT	no hit
Dguok	Q9QX60-2	Isoform 2 of Deoxyguanosine kinase, mitochondrial OS=Mus musculus GN=Dguok	3	2	-0.23305	0.0737946	0.343898	(DKO_1 - WT) - (DKO_2 - WT)	no hit
Acot13	Q4VA32|Q9CQR4	Acyl-coenzyme A thioesterase 13 OS=Mus musculus GN=Acot13 PE=1 SV=1|Acyl-coenzyme A thioesterase 13 OS=Mus musculus GN=Acot13 PE=1 SV=1	3	2	-0.233	0.048288	0.273815	DKO_1 - WT	no hit
Arpp19	E9Q4B9|E9Q827|P56212|P56212-2	cAMP-regulated phosphoprotein 19 OS=Mus musculus GN=Arpp19 PE=1 SV=1|cAMP-regulated phosphoprotein 19 OS=Mus musculus GN=Arpp19 PE=1 SV=1|cAMP-regulated phosphoprotein 19 OS=Mus musculus GN=Arpp19 PE=1 SV=2|Isoform ARPP-16 of cAMP-regulated phosphoprotein 19 OS=Mus musculus GN=Arpp19	3	2	-0.23296	0.0748648	0.346565	(DKO_1 - WT) - (DKO_2 - WT)	no hit
Znhit6	Q3UFB2|Q3UFB2-2	Box C/D snoRNA protein 1 OS=Mus musculus GN=Znhit6 PE=1 SV=2|Isoform 2 of Box C/D snoRNA protein 1 OS=Mus musculus GN=Znhit6	3	2	-0.232918	0.217144	0.558821	(DKO_1 - WT) - (DKO_2 - WT)	no hit
Pfdn5	E9PVG3|E9PZ62|Q9WU28	Prefoldin subunit 5 OS=Mus musculus GN=Pfdn5 PE=1 SV=1|Prefoldin subunit 5 OS=Mus musculus GN=Pfdn5 PE=1 SV=1|Prefoldin subunit 5 OS=Mus musculus GN=Pfdn5 PE=1 SV=1	3	2	-0.232853	0.0404618	0.249977	DKO_1 - WT	no hit
Tram2	Q924Z5	Translocating chain-associated membrane protein 2 OS=Mus musculus GN=Tram2 PE=1 SV=1	3	2	-0.232715	0.0464899	0.272604	(DKO_1 - WT) - (DKO_2 - WT)	no hit
Prom1	A0A0G2JDH9|G3X9J8|G5E8G5|O54990|O54990-2|O54990-3|O54990-6|Q8CDK8|Q8R056	Prominin-1 OS=Mus musculus GN=Prom1 PE=1 SV=1|Prominin 1, isoform CRA_g OS=Mus musculus GN=Prom1 PE=1 SV=1|Prominin 1, isoform CRA_a OS=Mus musculus GN=Prom1 PE=1 SV=1|Prominin-1 OS=Mus musculus GN=Prom1 PE=1 SV=1|Isoform 2 of Prominin-1 OS=Mus musculus GN=Prom1|Isoform 3 of Prominin-1 OS=Mus musculus GN=Prom1|Isoform 6 of Prominin-1 OS=Mus musculus GN=Prom1|Prominin-1 OS=Mus musculus GN=Prom1 PE…	3	2	-0.23266	0.0617146	0.965486	DKO_2 - WT	no hit
Ctnna1	P26231|Q545R0	Catenin alpha-1 OS=Mus musculus GN=Ctnna1 PE=1 SV=1|Catenin (Cadherin associated protein), alpha 1 OS=Mus musculus GN=Ctnna1 PE=1 SV=1	3	2	-0.23255	0.0502445	0.28294	(DKO_1 - WT) - (DKO_2 - WT)	no hit
Pitpnm1	O35954	Membrane-associated phosphatidylinositol transfer protein 1 OS=Mus musculus GN=Pitpnm1 PE=1 SV=1	3	2	-0.232347	0.04256	0.258025	DKO_1 - WT	no hit
Frem2	Q6NVD0	FRAS1-related extracellular matrix protein 2 OS=Mus musculus GN=Frem2 PE=1 SV=2	3	2	-0.232136	0.0482689	0.96119	DKO_2 - WT	no hit
Fam3a	I7HJS7|I7HLV5|Q9D8T0	Novel protein OS=Mus musculus GN=Fam3a PE=1 SV=1|Novel protein (Fragment) OS=Mus musculus GN=Fam3a PE=1 SV=1|Protein FAM3A OS=Mus musculus GN=Fam3a PE=2 SV=1	3	2	-0.232102	0.042711	0.258083	DKO_1 - WT	no hit
Renbp	D6RHA2|P82343|P82343-2	N-acylglucosamine 2-epimerase OS=Mus musculus GN=Renbp PE=1 SV=2|N-acylglucosamine 2-epimerase OS=Mus musculus GN=Renbp PE=1 SV=3|Isoform 2 of N-acylglucosamine 2-epimerase OS=Mus musculus GN=Renbp	3	2	-0.231921	0.150318	0.476827	(DKO_1 - WT) - (DKO_2 - WT)	no hit
Bicd2	Q921C5|Q921C5-2	Protein bicaudal D homolog 2 OS=Mus musculus GN=Bicd2 PE=1 SV=1|Isoform 2 of Protein bicaudal D homolog 2 OS=Mus musculus GN=Bicd2	3	2	-0.231757	0.0465161	0.268991	DKO_1 - WT	no hit
Mtmr3	B1ATD4|B1ATD5|M0QW74|Q8K296|Q8K296-2|R4GML8	Myotubularin-related protein 3 (Fragment) OS=Mus musculus GN=Mtmr3 PE=1 SV=1|MCG9626, isoform CRA_b OS=Mus musculus GN=Mtmr3 PE=1 SV=1|MCG9626, isoform CRA_c OS=Mus musculus GN=Mtmr3 PE=1 SV=1|Myotubularin-related protein 3 OS=Mus musculus GN=Mtmr3 PE=1 SV=2|Isoform 2 of Myotubularin-related protein 3 OS=Mus musculus GN=Mtmr3|Myotubularin-related protein 3 (Fragment) OS=Mus musculus GN=Mtmr3 PE=1…	3	2	-0.231708	0.0558177	0.292243	DKO_1 - WT	no hit
Smpd2	O70572	Sphingomyelin phosphodiesterase 2 OS=Mus musculus GN=Smpd2 PE=1 SV=1	3	2	-0.231681	0.0786064	0.356338	(DKO_1 - WT) - (DKO_2 - WT)	no hit
Mff	F7CTF8|Q6PCP5|Q6PCP5-3	Mitochondrial fission factor (Fragment) OS=Mus musculus GN=Mff PE=1 SV=1|Mitochondrial fission factor OS=Mus musculus GN=Mff PE=1 SV=1|Isoform 3 of Mitochondrial fission factor OS=Mus musculus GN=Mff	3	2	-0.23154	0.0785106	0.356153	(DKO_1 - WT) - (DKO_2 - WT)	no hit
Sox4	Q06831	Transcription factor SOX-4 OS=Mus musculus GN=Sox4 PE=1 SV=2	3	2	-0.23151	0.0606422	0.309509	(DKO_1 - WT) - (DKO_2 - WT)	no hit
Hoxc5	P32043	Homeobox protein Hox-C5 OS=Mus musculus GN=Hoxc5 PE=2 SV=3	3	2	-0.231498	0.124413	0.419644	DKO_1 - WT	no hit
Mrpl54	Q9CPW3	39S ribosomal protein L54, mitochondrial OS=Mus musculus GN=Mrpl54 PE=1 SV=1	3	2	-0.231487	0.046143	0.267737	DKO_1 - WT	no hit
Phactr1	B1B1B8|Q2M3X8|Q2M3X8-2|Q2M3X8-3|Q2M3X8-4	Phosphatase and actin regulator OS=Mus musculus GN=Phactr1 PE=1 SV=1|Phosphatase and actin regulator 1 OS=Mus musculus GN=Phactr1 PE=1 SV=1|Isoform 2 of Phosphatase and actin regulator 1 OS=Mus musculus GN=Phactr1|Isoform 3 of Phosphatase and actin regulator 1 OS=Mus musculus GN=Phactr1|Isoform 4 of Phosphatase and actin regulator 1 OS=Mus musculus GN=Phactr1	3	2	-0.231485	0.114753	0.40675	DKO_1 - WT	no hit
Mff	F7CTF8|Q6PCP5|Q6PCP5-3	Mitochondrial fission factor (Fragment) OS=Mus musculus GN=Mff PE=1 SV=1|Mitochondrial fission factor OS=Mus musculus GN=Mff PE=1 SV=1|Isoform 3 of Mitochondrial fission factor OS=Mus musculus GN=Mff	3	2	-0.231371	0.0786983	0.343784	DKO_1 - WT	no hit
Igf2r	Q07113	Cation-independent mannose-6-phosphate receptor OS=Mus musculus GN=Igf2r PE=1 SV=1	3	2	-0.231258	0.0749274	0.346565	(DKO_1 - WT) - (DKO_2 - WT)	no hit
Pop4	Q9CR08	Ribonuclease P protein subunit p29 OS=Mus musculus GN=Pop4 PE=2 SV=1	3	2	-0.231238	0.044967	0.270039	(DKO_1 - WT) - (DKO_2 - WT)	no hit
Flnc	D3YW87|D3Z576|Q8VHX6|Q8VHX6-2	Filamin-C OS=Mus musculus GN=Flnc PE=1 SV=2|Filamin-C OS=Mus musculus GN=Flnc PE=1 SV=2|Filamin-C OS=Mus musculus GN=Flnc PE=1 SV=3|Isoform 2 of Filamin-C OS=Mus musculus GN=Flnc	3	2	-0.231238	0.0505197	0.283741	(DKO_1 - WT) - (DKO_2 - WT)	no hit
Zcchc9	Q8R1J3	Zinc finger CCHC domain-containing protein 9 OS=Mus musculus GN=Zcchc9 PE=2 SV=2	3	2	-0.231147	0.0460472	0.26742	DKO_1 - WT	no hit
Gpc3	Q3TWB2|Q8CFZ4	Glypican 3 OS=Mus musculus GN=Gpc3 PE=1 SV=1|Glypican-3 OS=Mus musculus GN=Gpc3 PE=2 SV=1	3	2	-0.23102	0.0434693	0.96119	DKO_2 - WT	no hit
Tigar	B2RWB7|Q8BZA9	9630033F20Rik protein OS=Mus musculus GN=Tigar PE=1 SV=1|Fructose-2,6-bisphosphatase TIGAR OS=Mus musculus GN=Tigar PE=1 SV=1	3	2	-0.231013	0.142613	0.465414	(DKO_1 - WT) - (DKO_2 - WT)	no hit
Rbms1|Rbms3	E9PZ21|Q8BWL5|Q8BWL5-2|Q8BWL5-3|Q8BWL5-4|Q8BWL5-5|Q8BWL5-6|Q91W59|Q91W59-2|Q91W59-3	RNA-binding motif, single-stranded-interacting protein 1 OS=Mus musculus GN=Rbms1 PE=1 SV=1|RNA-binding motif, single-stranded-interacting protein 3 OS=Mus musculus GN=Rbms3 PE=2 SV=2|Isoform 2 of RNA-binding motif, single-stranded-interacting protein 3 OS=Mus musculus GN=Rbms3|Isoform 3 of RNA-binding motif, single-stranded-interacting protein 3 OS=Mus musculus GN=Rbms3|Isoform 4 of RNA-binding …	3	2	-0.2309	0.0525376	0.287654	(DKO_1 - WT) - (DKO_2 - WT)	no hit
Mfge8	P21956|P21956-2	Lactadherin OS=Mus musculus GN=Mfge8 PE=1 SV=3|Isoform 2 of Lactadherin OS=Mus musculus GN=Mfge8	3	2	-0.230741	0.0536008	0.96119	DKO_2 - WT	no hit
Phc1	Q64028|Q64028-2|Q64028-3|Q7TT35	Polyhomeotic-like protein 1 OS=Mus musculus GN=Phc1 PE=1 SV=2|Isoform 2 of Polyhomeotic-like protein 1 OS=Mus musculus GN=Phc1|Isoform 3 of Polyhomeotic-like protein 1 OS=Mus musculus GN=Phc1|Polyhomeotic-like 1 (Drosophila) OS=Mus musculus GN=Phc1 PE=1 SV=1	3	2	-0.230735	0.0465276	0.96119	DKO_2 - WT	no hit
Sos2	A0A0A0MQ87|Q02384|S4R2C4	Son of sevenless homolog 2 OS=Mus musculus GN=Sos2 PE=1 SV=1|Son of sevenless homolog 2 OS=Mus musculus GN=Sos2 PE=1 SV=2|Son of sevenless homolog 2 OS=Mus musculus GN=Sos2 PE=1 SV=1	3	2	-0.23068	0.0615705	0.311957	(DKO_1 - WT) - (DKO_2 - WT)	no hit
Slc29a3	Q99P65	Equilibrative nucleoside transporter 3 OS=Mus musculus GN=Slc29a3 PE=1 SV=1	3	2	-0.230569	0.0404483	0.258765	(DKO_1 - WT) - (DKO_2 - WT)	no hit
Gpx7	Q3TNK3|Q99LJ6	Glutathione peroxidase OS=Mus musculus GN=Gpx7 PE=1 SV=1|Glutathione peroxidase 7 OS=Mus musculus GN=Gpx7 PE=1 SV=1	3	2	-0.230491	0.0467864	0.27318	(DKO_1 - WT) - (DKO_2 - WT)	no hit
Lrch4	H3BLL3|Q921G6	Leucine-rich repeat and calponin homology domain-containing protein 4 OS=Mus musculus GN=Lrch4 PE=1 SV=1|Leucine-rich repeat and calponin homology domain-containing protein 4 OS=Mus musculus GN=Lrch4 PE=1 SV=1	3	2	-0.230396	0.0598774	0.301558	DKO_1 - WT	no hit
Nefh	P19246	Neurofilament heavy polypeptide OS=Mus musculus GN=Nefh PE=1 SV=3	3	2	-0.230376	0.105976	0.391129	DKO_1 - WT	no hit
Sptbn1	Q62261|Q62261-2	Spectrin beta chain, non-erythrocytic 1 OS=Mus musculus GN=Sptbn1 PE=1 SV=2|Isoform 2 of Spectrin beta chain, non-erythrocytic 1 OS=Mus musculus GN=Sptbn1	3	2	-0.230376	0.0519185	0.283498	DKO_1 - WT	no hit
Fn1	A0A087WR50|Q3UHL6	Fibronectin OS=Mus musculus GN=Fn1 PE=1 SV=1|Fibronectin OS=Mus musculus GN=Fn1 PE=1 SV=1	3	2	-0.230338	0.0549873	0.961587	DKO_2 - WT	no hit
Dse	Q8BLI4	Dermatan-sulfate epimerase OS=Mus musculus GN=Dse PE=2 SV=1	3	2	-0.230314	0.0499552	0.28294	(DKO_1 - WT) - (DKO_2 - WT)	no hit
Pdf	S4R2K0	Peptide deformylase OS=Mus musculus GN=Pdf PE=1 SV=1	3	2	-0.230218	0.0543023	0.290164	DKO_1 - WT	no hit
Sec24c	G3X972	Protein Sec24c OS=Mus musculus GN=Sec24c PE=1 SV=1	3	2	-0.230209	0.0453689	0.270591	(DKO_1 - WT) - (DKO_2 - WT)	no hit
Znhit6	Q3UFB2|Q3UFB2-2	Box C/D snoRNA protein 1 OS=Mus musculus GN=Znhit6 PE=1 SV=2|Isoform 2 of Box C/D snoRNA protein 1 OS=Mus musculus GN=Znhit6	3	2	-0.230164	0.222233	0.999773	DKO_2 - WT	no hit
Tmem38b	Q9DAV9	Trimeric intracellular cation channel type B OS=Mus musculus GN=Tmem38b PE=1 SV=1	3	2	-0.230145	0.249393	0.999773	DKO_2 - WT	no hit
Aurkb	O70126	Aurora kinase B OS=Mus musculus GN=Aurkb PE=1 SV=2	3	2	-0.230053	0.0436779	0.259793	DKO_1 - WT	no hit
Racgap1	Q9WVM1	Rac GTPase-activating protein 1 OS=Mus musculus GN=Racgap1 PE=1 SV=1	3	2	-0.230027	0.0474482	0.270737	DKO_1 - WT	no hit
Fyco1	Q8VDC1	FYVE and coiled-coil domain-containing protein 1 OS=Mus musculus GN=Fyco1 PE=1 SV=1	3	2	-0.230008	0.0441297	0.261195	DKO_1 - WT	no hit
Mrm3	Q5ND52	rRNA methyltransferase 3, mitochondrial OS=Mus musculus GN=Mrm3 PE=2 SV=1	3	2	-0.229819	0.0452017	0.26369	DKO_1 - WT	no hit
Kiaa0100	Q5SYL3	Protein KIAA0100 OS=Mus musculus GN=Kiaa0100 PE=1 SV=1	3	2	-0.229759	0.0760268	0.338959	DKO_1 - WT	no hit
Rnf149	Q3U2C5|Q3U2C5-2	E3 ubiquitin-protein ligase RNF149 OS=Mus musculus GN=Rnf149 PE=1 SV=3|Isoform 2 of E3 ubiquitin-protein ligase RNF149 OS=Mus musculus GN=Rnf149	3	2	-0.229727	0.196785	0.513095	DKO_1 - WT	no hit
Pls3	B1AX58|Q99K51	Plastin-3 OS=Mus musculus GN=Pls3 PE=1 SV=1|Plastin-3 OS=Mus musculus GN=Pls3 PE=1 SV=3	3	2	-0.229689	0.0592069	0.299825	DKO_1 - WT	no hit
Zdhhc21	Q9D270	Probable palmitoyltransferase ZDHHC21 OS=Mus musculus GN=Zdhhc21 PE=1 SV=2	3	2	-0.229687	0.104976	0.999773	DKO_2 - WT	no hit
Mfsd1	Q9DC37	Major facilitator superfamily domain-containing protein 1 OS=Mus musculus GN=Mfsd1 PE=1 SV=1	3	2	-0.229631	0.0445124	0.96119	DKO_2 - WT	no hit
Rab2b	P59279|Q0PD64	Ras-related protein Rab-2B OS=Mus musculus GN=Rab2b PE=1 SV=1|RAB2B, member RAS oncogene family, isoform CRA_a OS=Mus musculus GN=Rab2b PE=1 SV=1	3	2	-0.22962	0.0588753	0.305051	(DKO_1 - WT) - (DKO_2 - WT)	no hit
Adgre5|Cd97	A0A0D9SEG8|E9QJS7|E9QMJ5|Q9DC42|Q9Z0M6|Q9Z0M6-2|Q9Z0M6-3	Protein Adgre5 OS=Mus musculus GN=Adgre5 PE=1 SV=1|Protein Adgre5 OS=Mus musculus GN=Adgre5 PE=1 SV=1|Protein Adgre5 OS=Mus musculus GN=Adgre5 PE=1 SV=1|Protein Adgre5 OS=Mus musculus GN=Adgre5 PE=1 SV=1|CD97 antigen OS=Mus musculus GN=Cd97 PE=1 SV=2|Isoform 2 of CD97 antigen OS=Mus musculus GN=Cd97|Isoform 3 of CD97 antigen OS=Mus musculus GN=Cd97	3	2	-0.229526	0.0479525	0.276014	(DKO_1 - WT) - (DKO_2 - WT)	no hit
Ttyh2	Q3TH73|Q3TH73-2	Protein tweety homolog 2 OS=Mus musculus GN=Ttyh2 PE=1 SV=1|Isoform 2 of Protein tweety homolog 2 OS=Mus musculus GN=Ttyh2	3	2	-0.229175	0.0508343	0.96119	DKO_2 - WT	no hit
Efnb1	P52795|Q544L9	Ephrin-B1 OS=Mus musculus GN=Efnb1 PE=1 SV=1|Ephrin B1, isoform CRA_a OS=Mus musculus GN=Efnb1 PE=1 SV=1	3	2	-0.229103	0.0573305	0.963478	DKO_2 - WT	no hit
Ikbip	E9QMH7|Q9DBZ1|Q9DBZ1-2	Inhibitor of nuclear factor kappa-B kinase-interacting protein OS=Mus musculus GN=Ikbip PE=1 SV=1|Inhibitor of nuclear factor kappa-B kinase-interacting protein OS=Mus musculus GN=Ikbip PE=1 SV=2|Isoform 2 of Inhibitor of nuclear factor kappa-B kinase-interacting protein OS=Mus musculus GN=Ikbip	3	2	-0.228813	0.0765989	0.351331	(DKO_1 - WT) - (DKO_2 - WT)	no hit
Tmsb4x	P20065-2	Isoform Short of Thymosin beta-4 OS=Mus musculus GN=Tmsb4x	3	2	-0.228738	0.0434532	0.259321	DKO_1 - WT	no hit
Vamp8	A0A0R4J0R1|O70404	Vesicle-associated membrane protein 8 OS=Mus musculus GN=Vamp8 PE=1 SV=1|Vesicle-associated membrane protein 8 OS=Mus musculus GN=Vamp8 PE=1 SV=1	3	2	-0.228676	0.0521979	0.287199	(DKO_1 - WT) - (DKO_2 - WT)	no hit
Hif1an	Q8BLR9	Hypoxia-inducible factor 1-alpha inhibitor OS=Mus musculus GN=Hif1an PE=1 SV=2	3	2	-0.228611	0.0456781	0.27135	(DKO_1 - WT) - (DKO_2 - WT)	no hit
Znf518b|Zfp518b	B2RRE4|J3QPN0	Zinc finger protein 518B OS=Mus musculus GN=Znf518b PE=2 SV=1|MCG141317 OS=Mus musculus GN=Zfp518b PE=1 SV=1	3	2	-0.228559	0.0574361	0.302045	(DKO_1 - WT) - (DKO_2 - WT)	no hit
Usp36	B1AQJ2	Ubiquitin carboxyl-terminal hydrolase 36 OS=Mus musculus GN=Usp36 PE=1 SV=1	3	2	-0.22838	0.0436369	0.265547	(DKO_1 - WT) - (DKO_2 - WT)	no hit
Vps9d1	Q3U280|Q8C190|Q8C190-2	VPS9 domain-containing protein 1 OS=Mus musculus GN=Vps9d1 PE=1 SV=1|VPS9 domain-containing protein 1 OS=Mus musculus GN=Vps9d1 PE=1 SV=1|Isoform 2 of VPS9 domain-containing protein 1 OS=Mus musculus GN=Vps9d1	3	2	-0.2283	0.120669	0.413998	DKO_1 - WT	no hit
Fam172a	Q3TNH5	Protein FAM172A OS=Mus musculus GN=Fam172a PE=1 SV=2	3	2	-0.228248	0.0467323	0.269709	DKO_1 - WT	no hit
Serbp1	Q3UMP4|Q9CY58|Q9CY58-3	Plasminogen activator inhibitor 1 RNA-binding protein OS=Mus musculus GN=Serbp1 PE=1 SV=1|Plasminogen activator inhibitor 1 RNA-binding protein OS=Mus musculus GN=Serbp1 PE=1 SV=2|Isoform 3 of Plasminogen activator inhibitor 1 RNA-binding protein OS=Mus musculus GN=Serbp1	3	2	-0.228137	0.0549921	0.291549	DKO_1 - WT	no hit
Lrpap1	P55302|Q52KI7	Alpha-2-macroglobulin receptor-associated protein OS=Mus musculus GN=Lrpap1 PE=1 SV=1|Alpha-2-macroglobulin receptor-associated protein OS=Mus musculus GN=Lrpap1 PE=1 SV=1	3	2	-0.228106	0.0449627	0.96119	DKO_2 - WT	no hit
Clec16a	H7BXB6|Q80U30|Q80U30-2|Q80U30-3|Q80U30-4|Z4YLG3	Protein CLEC16A OS=Mus musculus GN=Clec16a PE=1 SV=1|Protein CLEC16A OS=Mus musculus GN=Clec16a PE=1 SV=2|Isoform 2 of Protein CLEC16A OS=Mus musculus GN=Clec16a|Isoform 3 of Protein CLEC16A OS=Mus musculus GN=Clec16a|Isoform 4 of Protein CLEC16A OS=Mus musculus GN=Clec16a|Protein CLEC16A OS=Mus musculus GN=Clec16a PE=1 SV=1	3	2	-0.228061	0.0682818	0.329326	(DKO_1 - WT) - (DKO_2 - WT)	no hit
Acadl	A0A0R4J083|P51174	Long-chain-specific acyl-CoA dehydrogenase, mitochondrial OS=Mus musculus GN=Acadl PE=1 SV=1|Long-chain specific acyl-CoA dehydrogenase, mitochondrial OS=Mus musculus GN=Acadl PE=1 SV=2	3	2	-0.228001	0.0431526	0.264587	(DKO_1 - WT) - (DKO_2 - WT)	no hit
Sox4	Q06831	Transcription factor SOX-4 OS=Mus musculus GN=Sox4 PE=1 SV=2	3	2	-0.227987	0.0640329	0.311575	DKO_1 - WT	no hit
Nol12	Q8BG17	Nucleolar protein 12 OS=Mus musculus GN=Nol12 PE=1 SV=1	3	2	-0.227941	0.144815	0.999773	DKO_2 - WT	no hit
Cherp	G5E8I8|Q8CGZ0	Calcium homeostasis endoplasmic reticulum protein OS=Mus musculus GN=Cherp PE=1 SV=1|Calcium homeostasis endoplasmic reticulum protein OS=Mus musculus GN=Cherp PE=1 SV=1	3	2	-0.227843	0.0709762	0.974338	DKO_2 - WT	no hit
Ppp2r5e	Q61151	Serine/threonine-protein phosphatase 2A 56 kDa regulatory subunit epsilon isoform OS=Mus musculus GN=Ppp2r5e PE=1 SV=3	3	2	-0.227742	0.0566397	0.30023	(DKO_1 - WT) - (DKO_2 - WT)	no hit
Tfg	Q9Z1A1	Protein Tfg OS=Mus musculus GN=Tfg PE=1 SV=1	3	2	-0.227639	0.0850844	0.353645	DKO_1 - WT	no hit
Csmd2	V9GX34	Protein Csmd2 (Fragment) OS=Mus musculus GN=Csmd2 PE=1 SV=1	3	2	-0.227638	0.0567949	0.962425	DKO_2 - WT	no hit
Prr14	Q7TPN9	Proline-rich protein 14 OS=Mus musculus GN=Prr14 PE=2 SV=1	3	2	-0.227588	0.0612944	0.311368	(DKO_1 - WT) - (DKO_2 - WT)	no hit
Zc3h8	Q9JJ48	Zinc finger CCCH domain-containing protein 8 OS=Mus musculus GN=Zc3h8 PE=1 SV=2	3	2	-0.22753	0.0706362	0.974338	DKO_2 - WT	no hit
Lamtor3	O88653|Q542I7	Ragulator complex protein LAMTOR3 OS=Mus musculus GN=Lamtor3 PE=1 SV=1|MCG121084 OS=Mus musculus GN=Lamtor3 PE=1 SV=1	3	2	-0.227455	0.0530459	0.96119	DKO_2 - WT	no hit
Mrpl16	Q99N93	39S ribosomal protein L16, mitochondrial OS=Mus musculus GN=Mrpl16 PE=1 SV=1	3	2	-0.227375	0.0458768	0.266669	DKO_1 - WT	no hit
Csmd2	V9GX34	Protein Csmd2 (Fragment) OS=Mus musculus GN=Csmd2 PE=1 SV=1	3	2	-0.227355	0.0570535	0.295612	DKO_1 - WT	no hit
Notch2	G5E8J0	Neurogenic locus notch homolog protein 2 OS=Mus musculus GN=Notch2 PE=1 SV=1	3	2	-0.227285	0.137565	0.999773	DKO_2 - WT	no hit
Gxylt2	Q810K9	Glucoside xylosyltransferase 2 OS=Mus musculus GN=Gxylt2 PE=2 SV=1	3	2	-0.227261	0.0467253	0.269709	DKO_1 - WT	no hit
Slc44a2	Q8BY89|Q8BY89-2	Choline transporter-like protein 2 OS=Mus musculus GN=Slc44a2 PE=1 SV=2|Isoform 2 of Choline transporter-like protein 2 OS=Mus musculus GN=Slc44a2	3	2	-0.227245	0.0632947	0.314871	(DKO_1 - WT) - (DKO_2 - WT)	no hit
Slc9a3r1	P70441	Na(+)/H(+) exchange regulatory cofactor NHE-RF1 OS=Mus musculus GN=Slc9a3r1 PE=1 SV=3	3	2	-0.22718	0.185065	0.999773	DKO_2 - WT	no hit
Baiap2	B1AZ46|Q8BKX1|Q8BKX1-2|Q8BKX1-3|Q8BKX1-4	Brain-specific angiogenesis inhibitor 1-associated protein 2 OS=Mus musculus GN=Baiap2 PE=1 SV=1|Brain-specific angiogenesis inhibitor 1-associated protein 2 OS=Mus musculus GN=Baiap2 PE=1 SV=2|Isoform 2 of Brain-specific angiogenesis inhibitor 1-associated protein 2 OS=Mus musculus GN=Baiap2|Isoform 3 of Brain-specific angiogenesis inhibitor 1-associated protein 2 OS=Mus musculus GN=Baiap2|Isofo…	3	2	-0.227143	0.0453333	0.96119	DKO_2 - WT	no hit
Lrrc17	Q9CXD9	Leucine-rich repeat-containing protein 17 OS=Mus musculus GN=Lrrc17 PE=2 SV=1	3	2	-0.227095	0.0904726	0.999773	DKO_2 - WT	no hit
Inpp5e	A2AIX0|Q9JII1	72 kDa inositol polyphosphate 5-phosphatase OS=Mus musculus GN=Inpp5e PE=1 SV=1|72 kDa inositol polyphosphate 5-phosphatase OS=Mus musculus GN=Inpp5e PE=1 SV=1	3	2	-0.227072	0.0686139	0.330192	(DKO_1 - WT) - (DKO_2 - WT)	no hit
Cnr1	P47746	Cannabinoid receptor 1 OS=Mus musculus GN=Cnr1 PE=1 SV=1	3	2	-0.227047	0.0550121	0.294929	(DKO_1 - WT) - (DKO_2 - WT)	no hit
Ncl	P09405	Nucleolin OS=Mus musculus GN=Ncl PE=1 SV=2	3	2	-0.227009	0.0522368	0.96119	DKO_2 - WT	no hit
Lamb1	E9QN70|P02469	Laminin subunit beta-1 OS=Mus musculus GN=Lamb1 PE=1 SV=1|Laminin subunit beta-1 OS=Mus musculus GN=Lamb1 PE=1 SV=3	3	2	-0.226679	0.045724	0.96119	DKO_2 - WT	no hit
Arpc5	Q9CPW4	Actin-related protein 2/3 complex subunit 5 OS=Mus musculus GN=Arpc5 PE=1 SV=3	3	2	-0.226479	0.0903411	0.381538	(DKO_1 - WT) - (DKO_2 - WT)	no hit
Sfxn2	Q3UC14|Q925N2	Sideroflexin OS=Mus musculus GN=Sfxn2 PE=1 SV=1|Sideroflexin-2 OS=Mus musculus GN=Sfxn2 PE=1 SV=1	3	2	-0.226388	0.0679078	0.328499	(DKO_1 - WT) - (DKO_2 - WT)	no hit
Mpv17l2	Q8VIK2	Mpv17-like protein 2 OS=Mus musculus GN=Mpv17l2 PE=1 SV=1	3	2	-0.226297	0.0576341	0.302241	(DKO_1 - WT) - (DKO_2 - WT)	no hit
Rdx	P26043	Radixin OS=Mus musculus GN=Rdx PE=1 SV=3	3	2	-0.226225	0.0603845	0.963731	DKO_2 - WT	no hit
Skt|Etl4	A2AQ25|E9QAU4	Sickle tail protein OS=Mus musculus GN=Skt PE=1 SV=1|Sickle tail protein OS=Mus musculus GN=Etl4 PE=1 SV=1	3	2	-0.226175	0.0627142	0.307271	DKO_1 - WT	no hit
Derl2	Q8BNI4|Q8BNI4-2	Derlin-2 OS=Mus musculus GN=Derl2 PE=1 SV=2|Isoform 2 of Derlin-2 OS=Mus musculus GN=Derl2	3	2	-0.226073	0.0781	0.343248	DKO_1 - WT	no hit
Wdr77	Q99J09	Methylosome protein 50 OS=Mus musculus GN=Wdr77 PE=1 SV=1	3	2	-0.22597	0.0474746	0.274976	(DKO_1 - WT) - (DKO_2 - WT)	no hit
F11r	O88792	Junctional adhesion molecule A OS=Mus musculus GN=F11r PE=1 SV=2	3	2	-0.225968	0.110862	0.401074	DKO_1 - WT	no hit
Gstm2	P15626	Glutathione S-transferase Mu 2 OS=Mus musculus GN=Gstm2 PE=1 SV=2	3	2	-0.225966	0.092867	0.369125	DKO_1 - WT	no hit
Ddx4	Q3V086|Q61496	DEAD box polypeptide 4 OS=Mus musculus GN=Ddx4 PE=1 SV=1|Probable ATP-dependent RNA helicase DDX4 OS=Mus musculus GN=Ddx4 PE=1 SV=2	3	2	-0.225941	0.0595398	0.963731	DKO_2 - WT	no hit
Rps15	D3YTQ9|P62843	40S ribosomal protein S15 OS=Mus musculus GN=Rps15 PE=1 SV=1|40S ribosomal protein S15 OS=Mus musculus GN=Rps15 PE=1 SV=2	3	2	-0.225782	0.0471246	0.96119	DKO_2 - WT	no hit
Jmjd1c	G3UZM1|Q69ZK6	Probable JmjC domain-containing histone demethylation protein 2C OS=Mus musculus GN=Jmjd1c PE=1 SV=1|Probable JmjC domain-containing histone demethylation protein 2C OS=Mus musculus GN=Jmjd1c PE=1 SV=3	3	2	-0.225723	0.109427	0.999773	DKO_2 - WT	no hit
Ephb3	P54754	Ephrin type-B receptor 3 OS=Mus musculus GN=Ephb3 PE=1 SV=2	3	2	-0.225585	0.0998605	0.398689	(DKO_1 - WT) - (DKO_2 - WT)	no hit
Mink1	G3X9G2|Q5SXG1|Q5SXG3|Q9JM52|Q9JM52-2|Q9JM52-3	Misshapen-like kinase 1 OS=Mus musculus GN=Mink1 PE=1 SV=1|Misshapen-like kinase 1 OS=Mus musculus GN=Mink1 PE=1 SV=1|Misshapen-like kinase 1 OS=Mus musculus GN=Mink1 PE=1 SV=1|Misshapen-like kinase 1 OS=Mus musculus GN=Mink1 PE=1 SV=3|Isoform 1 of Misshapen-like kinase 1 OS=Mus musculus GN=Mink1|Isoform 3 of Misshapen-like kinase 1 OS=Mus musculus GN=Mink1	3	2	-0.225519	0.0565016	0.299939	(DKO_1 - WT) - (DKO_2 - WT)	no hit
Npat	Q8BMA5	Protein NPAT OS=Mus musculus GN=Npat PE=1 SV=2	3	2	-0.225498	0.0959099	0.390883	(DKO_1 - WT) - (DKO_2 - WT)	no hit
Arrb2	Q91YI4|Q91YI4-2	Beta-arrestin-2 OS=Mus musculus GN=Arrb2 PE=1 SV=1|Isoform 2 of Beta-arrestin-2 OS=Mus musculus GN=Arrb2	3	2	-0.225431	0.0790525	0.357256	(DKO_1 - WT) - (DKO_2 - WT)	no hit
Plppr3	A0A0R3P9D0	Phospholipid phosphatase-related protein type 3 OS=Mus musculus GN=Plppr3 PE=1 SV=1	3	2	-0.22541	0.0859772	0.371549	(DKO_1 - WT) - (DKO_2 - WT)	no hit
Q80WR5	Q80WR5	UPF0688 protein C1orf174 homolog OS=Mus musculus PE=1 SV=1	3	2	-0.225391	0.0753248	0.977137	DKO_2 - WT	no hit
Itgb5	G5E8F8|O70309|O70309-2|Q6PE70	Integrin beta OS=Mus musculus GN=Itgb5 PE=1 SV=1|Integrin beta-5 OS=Mus musculus GN=Itgb5 PE=1 SV=2|Isoform Beta-5B of Integrin beta-5 OS=Mus musculus GN=Itgb5|Integrin beta OS=Mus musculus GN=Itgb5 PE=1 SV=1	3	2	-0.225251	0.0999333	0.380215	DKO_1 - WT	no hit
Gopc	K3W4Q9|Q8BH60|Q8BH60-2	Golgi-associated PDZ and coiled-coil motif-containing protein OS=Mus musculus GN=Gopc PE=1 SV=1|Golgi-associated PDZ and coiled-coil motif-containing protein OS=Mus musculus GN=Gopc PE=1 SV=1|Isoform 2 of Golgi-associated PDZ and coiled-coil motif-containing protein OS=Mus musculus GN=Gopc	3	2	-0.225224	0.0506967	0.284285	(DKO_1 - WT) - (DKO_2 - WT)	no hit
Rrbp1	A2AVJ7|Q99PL5	Ribosome-binding protein 1 OS=Mus musculus GN=Rrbp1 PE=1 SV=1|Ribosome-binding protein 1 OS=Mus musculus GN=Rrbp1 PE=1 SV=2	3	2	-0.225107	0.0636123	0.965486	DKO_2 - WT	no hit
Rnf130	Q5SVR5|Q8VEM1	E3 ubiquitin-protein ligase RNF130 OS=Mus musculus GN=Rnf130 PE=1 SV=1|E3 ubiquitin-protein ligase RNF130 OS=Mus musculus GN=Rnf130 PE=2 SV=1	3	2	-0.224949	0.142934	0.465701	(DKO_1 - WT) - (DKO_2 - WT)	no hit
Dlg1	H7BWY4|Q811D0|Q811D0-2|Q811D0-3	Disks large homolog 1 OS=Mus musculus GN=Dlg1 PE=1 SV=1|Disks large homolog 1 OS=Mus musculus GN=Dlg1 PE=1 SV=1|Isoform 2 of Disks large homolog 1 OS=Mus musculus GN=Dlg1|Isoform 3 of Disks large homolog 1 OS=Mus musculus GN=Dlg1	3	2	-0.224881	0.0469229	0.270158	DKO_1 - WT	no hit
L2hgdh	Q91YP0	L-2-hydroxyglutarate dehydrogenase, mitochondrial OS=Mus musculus GN=L2hgdh PE=1 SV=1	3	2	-0.224484	0.0524598	0.284537	DKO_1 - WT	no hit
Hoxc6	P10629	Homeobox protein Hox-C6 OS=Mus musculus GN=Hoxc6 PE=2 SV=2	3	2	-0.224457	0.0472965	0.270737	DKO_1 - WT	no hit
Abcc4	E9Q236	Protein Abcc4 OS=Mus musculus GN=Abcc4 PE=1 SV=1	3	2	-0.224155	0.0454412	0.96119	DKO_2 - WT	no hit
Tm2d2	Q8R0I4	TM2 domain-containing protein 2 OS=Mus musculus GN=Tm2d2 PE=2 SV=1	3	2	-0.224128	0.0966017	0.391659	(DKO_1 - WT) - (DKO_2 - WT)	no hit
Ppp1r12a	Q9DBR7	Protein phosphatase 1 regulatory subunit 12A OS=Mus musculus GN=Ppp1r12a PE=1 SV=2	3	2	-0.22406	0.0746985	0.346121	(DKO_1 - WT) - (DKO_2 - WT)	no hit
Igf2r	Q07113	Cation-independent mannose-6-phosphate receptor OS=Mus musculus GN=Igf2r PE=1 SV=1	3	2	-0.224059	0.0830774	0.999773	DKO_2 - WT	no hit
Mrs2	Q5NCE8	Magnesium transporter MRS2 homolog, mitochondrial OS=Mus musculus GN=Mrs2 PE=2 SV=2	3	2	-0.223977	0.0519094	0.283498	DKO_1 - WT	no hit
Vangl1	F8WI52|Q80Z96	Vang-like protein 1 OS=Mus musculus GN=Vangl1 PE=1 SV=2|Vang-like protein 1 OS=Mus musculus GN=Vangl1 PE=1 SV=2	3	2	-0.223877	0.0548556	0.961587	DKO_2 - WT	no hit
Pitpnm1	O35954	Membrane-associated phosphatidylinositol transfer protein 1 OS=Mus musculus GN=Pitpnm1 PE=1 SV=1	3	2	-0.22387	0.049209	0.281264	(DKO_1 - WT) - (DKO_2 - WT)	no hit
Cc2d1a	E9PX94|Q8K1A6	Coiled-coil and C2 domain-containing protein 1A OS=Mus musculus GN=Cc2d1a PE=1 SV=2|Coiled-coil and C2 domain-containing protein 1A OS=Mus musculus GN=Cc2d1a PE=1 SV=2	3	2	-0.223754	0.0563709	0.299736	(DKO_1 - WT) - (DKO_2 - WT)	no hit
Mphosph8	Q3TYA6	M-phase phosphoprotein 8 OS=Mus musculus GN=Mphosph8 PE=1 SV=1	3	2	-0.223718	0.0807359	0.987711	DKO_2 - WT	no hit
Ddx20	Q9JJY4	Probable ATP-dependent RNA helicase DDX20 OS=Mus musculus GN=Ddx20 PE=1 SV=2	3	2	-0.223444	0.0777122	0.342952	DKO_1 - WT	no hit
Chst12	Q99LL3	Carbohydrate sulfotransferase 12 OS=Mus musculus GN=Chst12 PE=2 SV=2	3	2	-0.223443	0.054601	0.291041	DKO_1 - WT	no hit
Cdk6	Q0VBK8|Q64261	Cyclin-dependent kinase 6 OS=Mus musculus GN=Cdk6 PE=1 SV=1|Cyclin-dependent kinase 6 OS=Mus musculus GN=Cdk6 PE=1 SV=2	3	2	-0.223402	0.118774	0.999773	DKO_2 - WT	no hit
Grk5	Q3TST4|Q8VEB1	Protein-serine/threonine kinase OS=Mus musculus GN=Grk5 PE=1 SV=1|G protein-coupled receptor kinase 5 OS=Mus musculus GN=Grk5 PE=1 SV=2	3	2	-0.223388	0.0467407	0.273177	(DKO_1 - WT) - (DKO_2 - WT)	no hit
Mb21d2	D3Z742	MCG125361, isoform CRA_a OS=Mus musculus GN=Mb21d2 PE=1 SV=1	3	2	-0.22336	0.0994984	0.379898	DKO_1 - WT	no hit
P11260	P11260	LINE-1 retrotransposable element ORF1 protein OS=Mus musculus PE=1 SV=2	3	2	-0.223323	0.103096	0.999773	DKO_2 - WT	no hit
Mtif2	Q91YJ5	Translation initiation factor IF-2, mitochondrial OS=Mus musculus GN=Mtif2 PE=1 SV=2	3	2	-0.223279	0.0526854	0.287928	(DKO_1 - WT) - (DKO_2 - WT)	no hit
Llgl2	Q3TJ91	Lethal(2) giant larvae protein homolog 2 OS=Mus musculus GN=Llgl2 PE=1 SV=2	3	2	-0.223204	0.0735404	0.977137	DKO_2 - WT	no hit
Hadhb	Q99JY0	Trifunctional enzyme subunit beta, mitochondrial OS=Mus musculus GN=Hadhb PE=1 SV=1	3	2	-0.223059	0.0588049	0.298488	DKO_1 - WT	no hit
Nid2	O88322	Nidogen-2 OS=Mus musculus GN=Nid2 PE=1 SV=2	3	2	-0.222938	0.0597145	0.963731	DKO_2 - WT	no hit
Srrm1	A2A8V8|A2A8V9|E9PUK6|F6T4M4|Q52KI8	Serine/arginine repetitive matrix protein 1 OS=Mus musculus GN=Srrm1 PE=1 SV=1|Serine/arginine repetitive matrix protein 1 OS=Mus musculus GN=Srrm1 PE=1 SV=1|Serine/arginine repetitive matrix protein 1 OS=Mus musculus GN=Srrm1 PE=1 SV=1|Serine/arginine repetitive matrix protein 1 (Fragment) OS=Mus musculus GN=Srrm1 PE=1 SV=1|Serine/arginine repetitive matrix protein 1 OS=Mus musculus GN=Srrm1 PE=…	3	2	-0.222813	0.0839091	0.999773	DKO_2 - WT	no hit
Flrt2	Q8BLU0	Leucine-rich repeat transmembrane protein FLRT2 OS=Mus musculus GN=Flrt2 PE=1 SV=1	3	2	-0.222721	0.0697659	0.974338	DKO_2 - WT	no hit
Puf60	Q3UEB3-2	Isoform 2 of Poly(U)-binding-splicing factor PUF60 OS=Mus musculus GN=Puf60	3	2	-0.222665	0.0608429	0.302907	DKO_1 - WT	no hit
Mfsd5	Q921Y4	Molybdate-anion transporter OS=Mus musculus GN=Mfsd5 PE=2 SV=1	3	2	-0.222611	0.0510497	0.96119	DKO_2 - WT	no hit
Slbp	A0A0J9YV40|P97440|Q3U4T7|Q3V2L1	Histone RNA hairpin-binding protein OS=Mus musculus GN=Slbp PE=1 SV=1|Histone RNA hairpin-binding protein OS=Mus musculus GN=Slbp PE=1 SV=1|Histone RNA hairpin-binding protein OS=Mus musculus GN=Slbp PE=1 SV=1|Histone RNA hairpin-binding protein OS=Mus musculus GN=Slbp PE=1 SV=1	3	2	-0.222556	0.0478487	0.275906	(DKO_1 - WT) - (DKO_2 - WT)	no hit
Ly6h	Q544M1|Q8K356|Q9WUC3	Lymphocyte antigen 6 complex, locus H, isoform CRA_a OS=Mus musculus GN=Ly6h PE=1 SV=1|Lymphocyte antigen 6 complex, locus H OS=Mus musculus GN=Ly6h PE=1 SV=1|Lymphocyte antigen 6H OS=Mus musculus GN=Ly6h PE=1 SV=2	3	2	-0.22241	0.192882	0.50925	DKO_1 - WT	no hit
Incenp	Q9WU62|Q9WU62-2	Inner centromere protein OS=Mus musculus GN=Incenp PE=1 SV=2|Isoform 2 of Inner centromere protein OS=Mus musculus GN=Incenp	3	2	-0.222339	0.0487316	0.274412	DKO_1 - WT	no hit
Ythdf1	A2AWN8|P59326	YTH domain family 1, isoform CRA_a OS=Mus musculus GN=Ythdf1 PE=1 SV=1|YTH domain-containing family protein 1 OS=Mus musculus GN=Ythdf1 PE=1 SV=1	3	2	-0.222322	0.0722301	0.331231	DKO_1 - WT	no hit
Fnbp1l	E9PUK3	Formin-binding protein 1-like OS=Mus musculus GN=Fnbp1l PE=1 SV=1	3	2	-0.222322	0.0555185	0.296458	(DKO_1 - WT) - (DKO_2 - WT)	no hit
Slc20a1	Q61609	Sodium-dependent phosphate transporter 1 OS=Mus musculus GN=Slc20a1 PE=1 SV=1	3	2	-0.222191	0.1163	0.409354	DKO_1 - WT	no hit
Lims1	A0A0R4J005|E9QP62|Q99JW4	LIM and senescent cell antigen-like domains 1, isoform CRA_a OS=Mus musculus GN=Lims1 PE=1 SV=1|LIM and senescent cell antigen-like-containing domain protein 1 OS=Mus musculus GN=Lims1 PE=1 SV=1|LIM and senescent cell antigen-like-containing domain protein 1 OS=Mus musculus GN=Lims1 PE=1 SV=3	3	2	-0.22217	0.0602001	0.308242	(DKO_1 - WT) - (DKO_2 - WT)	no hit
Zfp60	P16374|Q8K0D9	Zinc finger protein 60 OS=Mus musculus GN=Zfp60 PE=2 SV=2|MCG23672, isoform CRA_a OS=Mus musculus GN=Zfp60 PE=1 SV=1	3	2	-0.22202	0.047607	0.96119	DKO_2 - WT	no hit
Sdf2	A0A0R4IZW9|Q9DCT5	Stromal cell-derived factor 2 OS=Mus musculus GN=Sdf2 PE=1 SV=1|Stromal cell-derived factor 2 OS=Mus musculus GN=Sdf2 PE=1 SV=1	3	2	-0.221929	0.0790739	0.343784	DKO_1 - WT	no hit
Il6st	Q00560|V9GX00	Interleukin-6 receptor subunit beta OS=Mus musculus GN=Il6st PE=1 SV=2|Interleukin-6 receptor subunit beta OS=Mus musculus GN=Il6st PE=1 SV=1	3	2	-0.221613	0.0904262	0.999773	DKO_2 - WT	no hit
Fam76a	Q922G2	Protein FAM76A OS=Mus musculus GN=Fam76a PE=2 SV=1	3	2	-0.2215	0.0726786	0.341395	(DKO_1 - WT) - (DKO_2 - WT)	no hit
P11260	P11260	LINE-1 retrotransposable element ORF1 protein OS=Mus musculus PE=1 SV=2	3	2	-0.221444	0.105671	0.409736	(DKO_1 - WT) - (DKO_2 - WT)	no hit
Pmvk	D3YXP6|Q9D1G2	Phosphomevalonate kinase OS=Mus musculus GN=Pmvk PE=1 SV=1|Phosphomevalonate kinase OS=Mus musculus GN=Pmvk PE=1 SV=3	3	2	-0.221406	0.0672582	0.32682	(DKO_1 - WT) - (DKO_2 - WT)	no hit
Zfp568	E9PYI1|Q0VGV0	Protein Zfp568 OS=Mus musculus GN=Zfp568 PE=1 SV=1|Protein Zfp568 OS=Mus musculus GN=Zfp568 PE=1 SV=1	3	2	-0.221322	0.117128	0.999773	DKO_2 - WT	no hit
Osbpl1a	Q91XL9	Oxysterol-binding protein-related protein 1 OS=Mus musculus GN=Osbpl1a PE=1 SV=2	3	2	-0.221316	0.0478223	0.272126	DKO_1 - WT	no hit
Plekhf2	Q91WB4	Pleckstrin homology domain-containing family F member 2 OS=Mus musculus GN=Plekhf2 PE=1 SV=1	3	2	-0.221294	0.0613935	0.965486	DKO_2 - WT	no hit
Snca	O55042|O55042-2	Alpha-synuclein OS=Mus musculus GN=Snca PE=1 SV=2|Isoform 2 of Alpha-synuclein OS=Mus musculus GN=Snca	3	2	-0.221251	0.0588103	0.305022	(DKO_1 - WT) - (DKO_2 - WT)	no hit
Dapk1	Q80YE7|Q80YE7-2	Death-associated protein kinase 1 OS=Mus musculus GN=Dapk1 PE=1 SV=3|Isoform 2 of Death-associated protein kinase 1 OS=Mus musculus GN=Dapk1	3	2	-0.22113	0.0617786	0.311957	(DKO_1 - WT) - (DKO_2 - WT)	no hit
Csnk1d	Q9DC28	Casein kinase I isoform delta OS=Mus musculus GN=Csnk1d PE=1 SV=2	3	2	-0.221071	0.070922	0.337067	(DKO_1 - WT) - (DKO_2 - WT)	no hit
Fam73b	Q8BK03	Mitoguardin-2 OS=Mus musculus GN=Fam73b PE=1 SV=1	3	2	-0.22103	0.1342	0.435059	DKO_1 - WT	no hit
Sh3pxd2a	O89032|O89032-2|O89032-3	SH3 and PX domain-containing protein 2A OS=Mus musculus GN=Sh3pxd2a PE=1 SV=2|Isoform 2 of SH3 and PX domain-containing protein 2A OS=Mus musculus GN=Sh3pxd2a|Isoform 3 of SH3 and PX domain-containing protein 2A OS=Mus musculus GN=Sh3pxd2a	3	2	-0.220971	0.0516666	0.283075	DKO_1 - WT	no hit
Vps29	D3YYD5|D3Z645|Q9QZ88|Q9QZ88-2	Vacuolar protein sorting-associated protein 29 (Fragment) OS=Mus musculus GN=Vps29 PE=1 SV=1|Vacuolar protein sorting-associated protein 29 OS=Mus musculus GN=Vps29 PE=1 SV=1|Vacuolar protein sorting-associated protein 29 OS=Mus musculus GN=Vps29 PE=1 SV=1|Isoform 2 of Vacuolar protein sorting-associated protein 29 OS=Mus musculus GN=Vps29	3	2	-0.220952	0.0653238	0.320686	(DKO_1 - WT) - (DKO_2 - WT)	no hit
Dnm1l	E9PUD2|Q8K1M6	Dynamin-1-like protein OS=Mus musculus GN=Dnm1l PE=1 SV=1|Dynamin-1-like protein OS=Mus musculus GN=Dnm1l PE=1 SV=2	3	2	-0.220942	0.0841399	0.369261	(DKO_1 - WT) - (DKO_2 - WT)	no hit
Ralb	Q9JIW9	Ras-related protein Ral-B OS=Mus musculus GN=Ralb PE=1 SV=1	3	2	-0.22093	0.0499082	0.96119	DKO_2 - WT	no hit
Lxn	P70202|Q14BZ3	Latexin OS=Mus musculus GN=Lxn PE=1 SV=2|Latexin OS=Mus musculus GN=Lxn PE=1 SV=1	3	2	-0.220893	0.0662884	0.323561	(DKO_1 - WT) - (DKO_2 - WT)	no hit
Tldc1	Q8K0P3	TLD domain-containing protein 1 OS=Mus musculus GN=Tldc1 PE=2 SV=1	3	2	-0.220852	0.0970139	0.375756	DKO_1 - WT	no hit
Nnt	Q61941	NAD(P) transhydrogenase, mitochondrial OS=Mus musculus GN=Nnt PE=1 SV=2	3	2	-0.220844	0.079079	0.343784	DKO_1 - WT	no hit
Sorcs2	Q9EPR5	VPS10 domain-containing receptor SorCS2 OS=Mus musculus GN=Sorcs2 PE=1 SV=2	3	2	-0.220704	0.0721128	0.974338	DKO_2 - WT	no hit
Hadhb	Q99JY0	Trifunctional enzyme subunit beta, mitochondrial OS=Mus musculus GN=Hadhb PE=1 SV=1	3	2	-0.220686	0.0611101	0.965486	DKO_2 - WT	no hit
Syngr3	Q8R191	Synaptogyrin-3 OS=Mus musculus GN=Syngr3 PE=1 SV=1	3	2	-0.220624	0.0517325	0.285851	(DKO_1 - WT) - (DKO_2 - WT)	no hit
Pck2	A0A0R4J0G0|Q8BH04	Phosphoenolpyruvate carboxykinase [GTP], mitochondrial OS=Mus musculus GN=Pck2 PE=1 SV=1|Phosphoenolpyruvate carboxykinase [GTP], mitochondrial OS=Mus musculus GN=Pck2 PE=1 SV=1	3	2	-0.22047	0.0641764	0.311575	DKO_1 - WT	no hit
Srpra	Q9DBG7	Signal recognition particle receptor subunit alpha OS=Mus musculus GN=Srpra PE=1 SV=1	3	2	-0.220463	0.051893	0.283498	DKO_1 - WT	no hit
Far1	Q922J9|Q922J9-4	Fatty acyl-CoA reductase 1 OS=Mus musculus GN=Far1 PE=1 SV=1|Isoform 4 of Fatty acyl-CoA reductase 1 OS=Mus musculus GN=Far1	3	2	-0.220431	0.0595204	0.300853	DKO_1 - WT	no hit
Sh3gl3	A0A0R4J0B8|Q62421	Endophilin-A3 OS=Mus musculus GN=Sh3gl3 PE=1 SV=1|Endophilin-A3 OS=Mus musculus GN=Sh3gl3 PE=1 SV=1	3	2	-0.220379	0.0959635	0.390883	(DKO_1 - WT) - (DKO_2 - WT)	no hit
Acot1	O55137	Acyl-coenzyme A thioesterase 1 OS=Mus musculus GN=Acot1 PE=1 SV=1	3	2	-0.220275	0.154329	0.462631	DKO_1 - WT	no hit
Apobec3	E9QMH1|H3BJ44|H3BJL0|H3BJQ3|H3BKE5|Q99J72|Q99J72-2|Q99J72-3|Q99J72-4	DNA dC->dU-editing enzyme APOBEC-3 OS=Mus musculus GN=Apobec3 PE=1 SV=1|DNA dC->dU-editing enzyme APOBEC-3 OS=Mus musculus GN=Apobec3 PE=1 SV=1|DNA dC->dU-editing enzyme APOBEC-3 OS=Mus musculus GN=Apobec3 PE=1 SV=1|DNA dC->dU-editing enzyme APOBEC-3 OS=Mus musculus GN=Apobec3 PE=1 SV=1|DNA dC->dU-editing enzyme APOBEC-3 OS=Mus musculus GN=Apobec3 PE=1 SV=1|DNA dC->dU-editing enzyme APOBEC-3 OS=M…	3	2	-0.22025	0.0516003	0.96119	DKO_2 - WT	no hit
Zcchc8	Q9CYA6	Zinc finger CCHC domain-containing protein 8 OS=Mus musculus GN=Zcchc8 PE=1 SV=3	3	2	-0.220199	0.110294	0.999773	DKO_2 - WT	no hit
Kiaa1161	Q69ZQ1	Uncharacterized family 31 glucosidase KIAA1161 OS=Mus musculus GN=Kiaa1161 PE=1 SV=2	3	2	-0.220062	0.0801559	0.345076	DKO_1 - WT	no hit
Terf1	P70371	Telomeric repeat-binding factor 1 OS=Mus musculus GN=Terf1 PE=1 SV=1	3	2	-0.219996	0.0497877	0.277112	DKO_1 - WT	no hit
Lrp12	Q8BUJ9|Q8BUJ9-2	Low-density lipoprotein receptor-related protein 12 OS=Mus musculus GN=Lrp12 PE=2 SV=2|Isoform 2 of Low-density lipoprotein receptor-related protein 12 OS=Mus musculus GN=Lrp12	3	2	-0.219978	0.257711	0.582364	DKO_1 - WT	no hit
Adam22	D3YUP9|Q9R1V6|Q9R1V6-10|Q9R1V6-11|Q9R1V6-12|Q9R1V6-13|Q9R1V6-14|Q9R1V6-15|Q9R1V6-17|Q9R1V6-4|Q9R1V6-5|Q9R1V6-6|Q9R1V6-7|Q9R1V6-8	Disintegrin and metalloproteinase domain-containing protein 22 OS=Mus musculus GN=Adam22 PE=1 SV=1|Disintegrin and metalloproteinase domain-containing protein 22 OS=Mus musculus GN=Adam22 PE=1 SV=2|Isoform 8 of Disintegrin and metalloproteinase domain-containing protein 22 OS=Mus musculus GN=Adam22|Isoform 9 of Disintegrin and metalloproteinase domain-containing protein 22 OS=Mus musculus GN=Adam…	3	2	-0.219891	0.0489644	0.27453	DKO_1 - WT	no hit
Trps1	G3UW90|Q80V18|V9GX74|V9GXA5|V9GXE9	Trichorhinophalangeal syndrome I (Human), isoform CRA_b OS=Mus musculus GN=Trps1 PE=1 SV=1|Trichorhinophalangeal syndrome I (Human), isoform CRA_a OS=Mus musculus GN=Trps1 PE=1 SV=1|Zinc finger transcription factor Trps1 OS=Mus musculus GN=Trps1 PE=1 SV=1|Zinc finger transcription factor Trps1 OS=Mus musculus GN=Trps1 PE=1 SV=1|Zinc finger transcription factor Trps1 OS=Mus musculus GN=Trps1 PE=1 …	3	2	-0.219888	0.0559096	0.962425	DKO_2 - WT	no hit
Atg16l1	Q8C0J2|Q8C0J2-2|Q8C0J2-3|Q8C0J2-5	Autophagy-related protein 16-1 OS=Mus musculus GN=Atg16l1 PE=1 SV=1|Isoform 2 of Autophagy-related protein 16-1 OS=Mus musculus GN=Atg16l1|Isoform 3 of Autophagy-related protein 16-1 OS=Mus musculus GN=Atg16l1|Isoform 5 of Autophagy-related protein 16-1 OS=Mus musculus GN=Atg16l1	3	2	-0.219779	0.0758816	0.349627	(DKO_1 - WT) - (DKO_2 - WT)	no hit
Mrpl1	Q99N96	39S ribosomal protein L1, mitochondrial OS=Mus musculus GN=Mrpl1 PE=1 SV=2	3	2	-0.219729	0.0571264	0.301453	(DKO_1 - WT) - (DKO_2 - WT)	no hit
Stat1	A0A087WSP5|Q8C3V4	Signal transducer and activator of transcription OS=Mus musculus GN=Stat1 PE=1 SV=1|Signal transducer and activator of transcription OS=Mus musculus GN=Stat1 PE=1 SV=1	3	2	-0.219528	0.097189	0.375948	DKO_1 - WT	no hit
Pacs2	E9Q7E9|Q3V3Q7	Phosphofurin acidic cluster sorting protein 2 OS=Mus musculus GN=Pacs2 PE=1 SV=1|Phosphofurin acidic cluster sorting protein 2 OS=Mus musculus GN=Pacs2 PE=1 SV=2	3	2	-0.219381	0.0495583	0.281264	(DKO_1 - WT) - (DKO_2 - WT)	no hit
Slc38a4	Q8R1S9	Sodium-coupled neutral amino acid transporter 4 OS=Mus musculus GN=Slc38a4 PE=1 SV=1	3	2	-0.219328	0.0870663	0.999773	DKO_2 - WT	no hit
Zbtb10	E9Q8X5	Protein Zbtb10 OS=Mus musculus GN=Zbtb10 PE=1 SV=1	3	2	-0.219258	0.0518286	0.96119	DKO_2 - WT	no hit
Vapa	Q9WV55	Vesicle-associated membrane protein-associated protein A OS=Mus musculus GN=Vapa PE=1 SV=2	3	2	-0.219212	0.0750452	0.336559	DKO_1 - WT	no hit
Slc6a8	E9Q151|Q8VBW1|Q8VBW1-2|Q8VBW1-3	Transporter OS=Mus musculus GN=Slc6a8 PE=1 SV=2|Sodium- and chloride-dependent creatine transporter 1 OS=Mus musculus GN=Slc6a8 PE=1 SV=1|Isoform 2 of Sodium- and chloride-dependent creatine transporter 1 OS=Mus musculus GN=Slc6a8|Isoform 3 of Sodium- and chloride-dependent creatine transporter 1 OS=Mus musculus GN=Slc6a8	3	2	-0.21914	0.0675129	0.970122	DKO_2 - WT	no hit
Hectd3	Q3U487	E3 ubiquitin-protein ligase HECTD3 OS=Mus musculus GN=Hectd3 PE=1 SV=2	3	2	-0.219067	0.0537306	0.288058	DKO_1 - WT	no hit
Rasa3	Q60790	Ras GTPase-activating protein 3 OS=Mus musculus GN=Rasa3 PE=1 SV=2	3	2	-0.219018	0.0512691	0.284747	(DKO_1 - WT) - (DKO_2 - WT)	no hit
P4ha2	Q5SX75|Q60716|Q60716-2	Procollagen-proline, 2-oxoglutarate 4-dioxygenase (Proline 4-hydroxylase), alpha II polypeptide, isoform CRA_f OS=Mus musculus GN=P4ha2 PE=1 SV=1|Prolyl 4-hydroxylase subunit alpha-2 OS=Mus musculus GN=P4ha2 PE=1 SV=1|Isoform IIa of Prolyl 4-hydroxylase subunit alpha-2 OS=Mus musculus GN=P4ha2	3	2	-0.21887	0.0495945	0.276629	DKO_1 - WT	no hit
Robo1	G5E843|O89026	Roundabout homolog 1 OS=Mus musculus GN=Robo1 PE=1 SV=1|Roundabout homolog 1 OS=Mus musculus GN=Robo1 PE=1 SV=1	3	2	-0.218611	0.0736725	0.333506	DKO_1 - WT	no hit
Gtse1	Q542Q3|Q8R080	G two S phase expressed protein 1, isoform CRA_a OS=Mus musculus GN=Gtse1 PE=1 SV=1|G2 and S phase-expressed protein 1 OS=Mus musculus GN=Gtse1 PE=1 SV=2	3	2	-0.218398	0.05357	0.289832	(DKO_1 - WT) - (DKO_2 - WT)	no hit
Dbt	P53395	Lipoamide acyltransferase component of branched-chain alpha-keto acid dehydrogenase complex, mitochondrial OS=Mus musculus GN=Dbt PE=1 SV=2	3	2	-0.218218	0.051493	0.282697	DKO_1 - WT	no hit
D930015E06Rik|Kiaa0922	A0A0B4J1F5|Q3U3D7|Q3U3D7-2|Q3U3D7-3	Protein D930015E06Rik OS=Mus musculus GN=D930015E06Rik PE=1 SV=1|Transmembrane protein 131-like OS=Mus musculus GN=Kiaa0922 PE=1 SV=1|Isoform 2 of Transmembrane protein 131-like OS=Mus musculus GN=Kiaa0922|Isoform 3 of Transmembrane protein 131-like OS=Mus musculus GN=Kiaa0922	3	2	-0.217959	0.0534622	0.28757	DKO_1 - WT	no hit
Syt11	Q9R0N3	Synaptotagmin-11 OS=Mus musculus GN=Syt11 PE=1 SV=2	3	2	-0.217848	0.0975349	0.376306	DKO_1 - WT	no hit
Slc3a2	P10852-2	Isoform 2 of 4F2 cell-surface antigen heavy chain OS=Mus musculus GN=Slc3a2	3	2	-0.217818	0.0902482	0.999773	DKO_2 - WT	no hit
Asap2	D3YX85|E9PX52|Q7SIG6	Arf-GAP with SH3 domain, ANK repeat and PH domain-containing protein 2 OS=Mus musculus GN=Asap2 PE=1 SV=2|Arf-GAP with SH3 domain, ANK repeat and PH domain-containing protein 2 OS=Mus musculus GN=Asap2 PE=1 SV=1|Arf-GAP with SH3 domain, ANK repeat and PH domain-containing protein 2 OS=Mus musculus GN=Asap2 PE=1 SV=3	3	2	-0.217641	0.0528996	0.28833	(DKO_1 - WT) - (DKO_2 - WT)	no hit
Dag1	Q544G5|Q62165	Dystroglycan OS=Mus musculus GN=Dag1 PE=1 SV=1|Dystroglycan OS=Mus musculus GN=Dag1 PE=1 SV=4	3	2	-0.217594	0.0698326	0.974338	DKO_2 - WT	no hit
Dimt1	Q9D0D4	Probable dimethyladenosine transferase OS=Mus musculus GN=Dimt1 PE=2 SV=1	3	2	-0.217592	0.0690029	0.974338	DKO_2 - WT	no hit
Grwd1	Q810D6	Glutamate-rich WD repeat-containing protein 1 OS=Mus musculus GN=Grwd1 PE=1 SV=2	3	2	-0.217537	0.0533079	0.287216	DKO_1 - WT	no hit
Ap3b1	Q9Z1T1	AP-3 complex subunit beta-1 OS=Mus musculus GN=Ap3b1 PE=1 SV=2	3	2	-0.217441	0.0565583	0.293985	DKO_1 - WT	no hit
Lmna	P48678	Prelamin-A/C OS=Mus musculus GN=Lmna PE=1 SV=2	3	2	-0.217312	0.110244	0.999773	DKO_2 - WT	no hit
Dkk2	Q9QYZ8	Dickkopf-related protein 2 OS=Mus musculus GN=Dkk2 PE=1 SV=2	3	2	-0.217182	0.0718673	0.974338	DKO_2 - WT	no hit
Rac1	K7Q7T7|P63001|Q3TLP8	RAS-related C3 botulinum substrate 1 OS=Mus musculus GN=Rac1 PE=1 SV=1|Ras-related C3 botulinum toxin substrate 1 OS=Mus musculus GN=Rac1 PE=1 SV=1|RAS-related C3 botulinum substrate 1, isoform CRA_a OS=Mus musculus GN=Rac1 PE=1 SV=1	3	2	-0.217072	0.0665477	0.970122	DKO_2 - WT	no hit
Pxn	F8VQ28|Q8VI36|Q8VI36-2	Paxillin OS=Mus musculus GN=Pxn PE=1 SV=1|Paxillin OS=Mus musculus GN=Pxn PE=1 SV=1|Isoform Alpha of Paxillin OS=Mus musculus GN=Pxn	3	2	-0.21698	0.0540524	0.291706	(DKO_1 - WT) - (DKO_2 - WT)	no hit
Smarcd2	Q99JR8|Q99JR8-2	SWI/SNF-related matrix-associated actin-dependent regulator of chromatin subfamily D member 2 OS=Mus musculus GN=Smarcd2 PE=1 SV=2|Isoform 2 of SWI/SNF-related matrix-associated actin-dependent regulator of chromatin subfamily D member 2 OS=Mus musculus GN=Smarcd2	3	2	-0.21696	0.0672475	0.32682	(DKO_1 - WT) - (DKO_2 - WT)	no hit
Mob1b|Mob1a	Q3T9U1|Q3UDM0|Q8BPB0|Q921Y0	MOB kinase activator 1B OS=Mus musculus GN=Mob1b PE=1 SV=1|MOB kinase activator 1B OS=Mus musculus GN=Mob1b PE=1 SV=1|MOB kinase activator 1B OS=Mus musculus GN=Mob1b PE=1 SV=3|MOB kinase activator 1A OS=Mus musculus GN=Mob1a PE=2 SV=3	3	2	-0.216912	0.0570598	0.301453	(DKO_1 - WT) - (DKO_2 - WT)	no hit
Tom1	O88746|Q3UDC3	Target of Myb protein 1 OS=Mus musculus GN=Tom1 PE=1 SV=1|Target of Myb protein 1 OS=Mus musculus GN=Tom1 PE=1 SV=1	3	2	-0.216824	0.0722629	0.340428	(DKO_1 - WT) - (DKO_2 - WT)	no hit
Oat	P29758|Q3TG75	Ornithine aminotransferase, mitochondrial OS=Mus musculus GN=Oat PE=1 SV=1|Ornithine aminotransferase, isoform CRA_b OS=Mus musculus GN=Oat PE=1 SV=1	3	2	-0.216734	0.0624968	0.313322	(DKO_1 - WT) - (DKO_2 - WT)	no hit
Dnajc1	Q61712	DnaJ homolog subfamily C member 1 OS=Mus musculus GN=Dnajc1 PE=1 SV=1	3	2	-0.216724	0.10449	0.407346	(DKO_1 - WT) - (DKO_2 - WT)	no hit
Parva	Q3UF75|Q9EPC1	Alpha-parvin OS=Mus musculus GN=Parva PE=1 SV=1|Alpha-parvin OS=Mus musculus GN=Parva PE=1 SV=1	3	2	-0.216671	0.0747661	0.977137	DKO_2 - WT	no hit
Npm3	Q9CPP0	Nucleoplasmin-3 OS=Mus musculus GN=Npm3 PE=1 SV=3	3	2	-0.21666	0.0551427	0.961587	DKO_2 - WT	no hit
Tbl1xr1	Q8BHJ5	F-box-like/WD repeat-containing protein TBL1XR1 OS=Mus musculus GN=Tbl1xr1 PE=1 SV=1	3	2	-0.216639	0.0863058	0.999773	DKO_2 - WT	no hit
Hspe1	Q4KL76|Q64433	10 kDa heat shock protein, mitochondrial OS=Mus musculus GN=Hspe1 PE=1 SV=1|10 kDa heat shock protein, mitochondrial OS=Mus musculus GN=Hspe1 PE=1 SV=2	3	2	-0.21663	0.0637066	0.31571	(DKO_1 - WT) - (DKO_2 - WT)	no hit
Ppp3cb	E0CZ78|P48453|P48453-2	Serine/threonine-protein phosphatase OS=Mus musculus GN=Ppp3cb PE=1 SV=1|Serine/threonine-protein phosphatase 2B catalytic subunit beta isoform OS=Mus musculus GN=Ppp3cb PE=1 SV=2|Isoform 1 of Serine/threonine-protein phosphatase 2B catalytic subunit beta isoform OS=Mus musculus GN=Ppp3cb	3	2	-0.216627	0.0556213	0.296723	(DKO_1 - WT) - (DKO_2 - WT)	no hit
Mrps34	Q9JIK9	28S ribosomal protein S34, mitochondrial OS=Mus musculus GN=Mrps34 PE=1 SV=1	3	2	-0.216595	0.055937	0.962425	DKO_2 - WT	no hit
Tlk2	B1ASU9	Serine/threonine-protein kinase tousled-like 2 OS=Mus musculus GN=Tlk2 PE=1 SV=1	3	2	-0.216538	0.142268	0.46499	(DKO_1 - WT) - (DKO_2 - WT)	no hit
Nup50	Q9JIH2	Nuclear pore complex protein Nup50 OS=Mus musculus GN=Nup50 PE=1 SV=3	3	2	-0.216517	0.0857368	0.999773	DKO_2 - WT	no hit
Zyx	Q62523|Q7TQE2	Zyxin OS=Mus musculus GN=Zyx PE=1 SV=2|Zyx protein OS=Mus musculus GN=Zyx PE=1 SV=1	3	2	-0.216515	0.068327	0.321949	DKO_1 - WT	no hit
Slc37a1	Q8R070	Glucose-6-phosphate exchanger SLC37A1 OS=Mus musculus GN=Slc37a1 PE=2 SV=1	3	2	-0.216418	0.0548796	0.961587	DKO_2 - WT	no hit
Cmip	Q9D486	C-Maf-inducing protein OS=Mus musculus GN=Cmip PE=1 SV=3	3	2	-0.216338	0.0735578	0.343531	(DKO_1 - WT) - (DKO_2 - WT)	no hit
Cyp1b1	Q64429	Cytochrome P450 1B1 OS=Mus musculus GN=Cyp1b1 PE=1 SV=3	3	2	-0.216246	0.139277	0.461659	(DKO_1 - WT) - (DKO_2 - WT)	no hit
Mical1	Q8VDP3|Q8VDP3-2|Q8VDP3-3	Protein-methionine sulfoxide oxidase MICAL1 OS=Mus musculus GN=Mical1 PE=1 SV=1|Isoform 2 of Protein-methionine sulfoxide oxidase MICAL1 OS=Mus musculus GN=Mical1|Isoform 3 of Protein-methionine sulfoxide oxidase MICAL1 OS=Mus musculus GN=Mical1	3	2	-0.216135	0.0605196	0.302172	DKO_1 - WT	no hit
Crabp2	P22935	Cellular retinoic acid-binding protein 2 OS=Mus musculus GN=Crabp2 PE=2 SV=2	3	2	-0.216064	0.163312	0.999773	DKO_2 - WT	no hit
Myo19	Q5SV80	Unconventional myosin-XIX OS=Mus musculus GN=Myo19 PE=2 SV=1	3	2	-0.216025	0.0567984	0.962425	DKO_2 - WT	no hit
Cldnd1	Q9CQX5	Claudin domain-containing protein 1 OS=Mus musculus GN=Cldnd1 PE=1 SV=1	3	2	-0.215937	0.0668629	0.317293	DKO_1 - WT	no hit
Bmpr1a	P36895|Q53Z43	Bone morphogenetic protein receptor type-1A OS=Mus musculus GN=Bmpr1a PE=2 SV=1|Receptor protein serine/threonine kinase OS=Mus musculus GN=Bmpr1a PE=1 SV=1	3	2	-0.215708	0.0638393	0.965486	DKO_2 - WT	no hit
Rela	Q04207|Q04207-2	Transcription factor p65 OS=Mus musculus GN=Rela PE=1 SV=1|Isoform p65 delta of Transcription factor p65 OS=Mus musculus GN=Rela	3	2	-0.215695	0.0636747	0.31571	(DKO_1 - WT) - (DKO_2 - WT)	no hit
ORF11	Q9ERY9	Probable ergosterol biosynthetic protein 28 OS=Mus musculus GN=ORF11 PE=2 SV=1	3	2	-0.215501	0.0892993	0.999773	DKO_2 - WT	no hit
Nfia	B1AUB9|B1AUC0|Q02780|Q02780-2|Q02780-3|Q02780-4|Q02780-5|Q02780-6|Q02780-7	Nuclear factor 1 OS=Mus musculus GN=Nfia PE=1 SV=1|Nuclear factor 1 OS=Mus musculus GN=Nfia PE=1 SV=1|Nuclear factor 1 A-type OS=Mus musculus GN=Nfia PE=1 SV=1|Isoform 1 of Nuclear factor 1 A-type OS=Mus musculus GN=Nfia|Isoform 3 of Nuclear factor 1 A-type OS=Mus musculus GN=Nfia|Isoform 4 of Nuclear factor 1 A-type OS=Mus musculus GN=Nfia|Isoform 5 of Nuclear factor 1 A-type OS=Mus musculus GN=…	3	2	-0.215473	0.0871693	0.37473	(DKO_1 - WT) - (DKO_2 - WT)	no hit
Yars2	Q8BYL4	Tyrosine--tRNA ligase, mitochondrial OS=Mus musculus GN=Yars2 PE=1 SV=2	3	2	-0.215472	0.0557921	0.292243	DKO_1 - WT	no hit
Adgrg1	Q8K209	Adhesion G-protein coupled receptor G1 OS=Mus musculus GN=Adgrg1 PE=1 SV=1	3	2	-0.215452	0.0950391	0.372744	DKO_1 - WT	no hit
Oma1	Q9D8H7	Metalloendopeptidase OMA1, mitochondrial OS=Mus musculus GN=Oma1 PE=1 SV=1	3	2	-0.215375	0.0600941	0.301558	DKO_1 - WT	no hit
Kif23	E9Q5G3	Kinesin-like protein KIF23 OS=Mus musculus GN=Kif23 PE=1 SV=1	3	2	-0.215359	0.0722606	0.340428	(DKO_1 - WT) - (DKO_2 - WT)	no hit
Scrn1	Q9CZC8	Secernin-1 OS=Mus musculus GN=Scrn1 PE=1 SV=1	3	2	-0.215326	0.118886	0.431777	(DKO_1 - WT) - (DKO_2 - WT)	no hit
Slc8a1	G3X9J1|G5E8Y0|Q68FL0	Sodium/calcium exchanger 1 OS=Mus musculus GN=Slc8a1 PE=1 SV=1|Sodium/calcium exchanger 1 OS=Mus musculus GN=Slc8a1 PE=1 SV=2|Slc8a1 protein OS=Mus musculus GN=Slc8a1 PE=1 SV=1	3	2	-0.21526	0.0698366	0.334146	(DKO_1 - WT) - (DKO_2 - WT)	no hit
Mrpl10	Q3TBW2	39S ribosomal protein L10, mitochondrial OS=Mus musculus GN=Mrpl10 PE=1 SV=2	3	2	-0.215157	0.075169	0.336588	DKO_1 - WT	no hit
Mrps7	Q80X85	28S ribosomal protein S7, mitochondrial OS=Mus musculus GN=Mrps7 PE=1 SV=1	3	2	-0.215121	0.0601676	0.301558	DKO_1 - WT	no hit
Slc35b2	Q91ZN5|Q91ZN5-2	Adenosine 3'-phospho 5'-phosphosulfate transporter 1 OS=Mus musculus GN=Slc35b2 PE=1 SV=1|Isoform 2 of Adenosine 3'-phospho 5'-phosphosulfate transporter 1 OS=Mus musculus GN=Slc35b2	3	2	-0.215022	0.10771	0.394826	DKO_1 - WT	no hit
Rad54l2	E9QKL0|Q99NG0	Helicase ARIP4 OS=Mus musculus GN=Rad54l2 PE=1 SV=1|Helicase ARIP4 OS=Mus musculus GN=Rad54l2 PE=1 SV=1	3	2	-0.21499	0.0576751	0.296745	DKO_1 - WT	no hit
Col6a2	Q02788	Collagen alpha-2(VI) chain OS=Mus musculus GN=Col6a2 PE=1 SV=3	3	2	-0.214966	0.056649	0.30023	(DKO_1 - WT) - (DKO_2 - WT)	no hit
Thoc3	Q8VE80	THO complex subunit 3 OS=Mus musculus GN=Thoc3 PE=2 SV=1	3	2	-0.214963	0.059988	0.963731	DKO_2 - WT	no hit
Prps1l3|Prps1	G3UXL2|Q9D7G0	Protein Prps1l3 OS=Mus musculus GN=Prps1l3 PE=3 SV=1|Ribose-phosphate pyrophosphokinase 1 OS=Mus musculus GN=Prps1 PE=1 SV=4	3	2	-0.214834	0.0865804	0.373188	(DKO_1 - WT) - (DKO_2 - WT)	no hit
Adam22	D3YUP9|Q9R1V6|Q9R1V6-10|Q9R1V6-11|Q9R1V6-12|Q9R1V6-13|Q9R1V6-14|Q9R1V6-15|Q9R1V6-17|Q9R1V6-4|Q9R1V6-5|Q9R1V6-6|Q9R1V6-7|Q9R1V6-8	Disintegrin and metalloproteinase domain-containing protein 22 OS=Mus musculus GN=Adam22 PE=1 SV=1|Disintegrin and metalloproteinase domain-containing protein 22 OS=Mus musculus GN=Adam22 PE=1 SV=2|Isoform 8 of Disintegrin and metalloproteinase domain-containing protein 22 OS=Mus musculus GN=Adam22|Isoform 9 of Disintegrin and metalloproteinase domain-containing protein 22 OS=Mus musculus GN=Adam…	3	2	-0.214825	0.0534724	0.96119	DKO_2 - WT	no hit
Wnk3	Q80XP9|Q80XP9-2|V9GWU7	Serine/threonine-protein kinase WNK3 OS=Mus musculus GN=Wnk3 PE=1 SV=3|Isoform 2 of Serine/threonine-protein kinase WNK3 OS=Mus musculus GN=Wnk3|Serine/threonine-protein kinase WNK3 OS=Mus musculus GN=Wnk3 PE=1 SV=1	3	2	-0.214547	0.07466	0.335591	DKO_1 - WT	no hit
Tsr2	H7BWY8|Q8C8T8|Z4YL87	Pre-rRNA-processing protein TSR2 homolog OS=Mus musculus GN=Tsr2 PE=1 SV=1|Pre-rRNA-processing protein TSR2 homolog OS=Mus musculus GN=Tsr2 PE=1 SV=1|Pre-rRNA-processing protein TSR2 homolog OS=Mus musculus GN=Tsr2 PE=1 SV=1	3	2	-0.214517	0.0811716	0.360949	(DKO_1 - WT) - (DKO_2 - WT)	no hit
Mak16	Q8BGS0|Q8BGS0-2	Protein MAK16 homolog OS=Mus musculus GN=Mak16 PE=1 SV=1|Isoform 2 of Protein MAK16 homolog OS=Mus musculus GN=Mak16	3	2	-0.214454	0.0775941	0.342952	DKO_1 - WT	no hit
Wnt5a	P22725|P22725-2	Protein Wnt-5a OS=Mus musculus GN=Wnt5a PE=1 SV=2|Isoform 2 of Protein Wnt-5a OS=Mus musculus GN=Wnt5a	3	2	-0.214454	0.0569892	0.962732	DKO_2 - WT	no hit
Aldh1b1	Q9CZS1	Aldehyde dehydrogenase X, mitochondrial OS=Mus musculus GN=Aldh1b1 PE=1 SV=1	3	2	-0.21445	0.0707003	0.337067	(DKO_1 - WT) - (DKO_2 - WT)	no hit
Cadm1	E9PYN1|Q8R5M8|Q8R5M8-2|Q8R5M8-3|Q8R5M8-4	Cell adhesion molecule 1 OS=Mus musculus GN=Cadm1 PE=1 SV=1|Cell adhesion molecule 1 OS=Mus musculus GN=Cadm1 PE=1 SV=2|Isoform 2 of Cell adhesion molecule 1 OS=Mus musculus GN=Cadm1|Isoform 3 of Cell adhesion molecule 1 OS=Mus musculus GN=Cadm1|Isoform 4 of Cell adhesion molecule 1 OS=Mus musculus GN=Cadm1	3	2	-0.214422	0.133833	0.434741	DKO_1 - WT	no hit
Tcf25	Q8R3L2|Q8R3L2-2|Q8R3L2-3|Q8R3L2-5	Transcription factor 25 OS=Mus musculus GN=Tcf25 PE=1 SV=2|Isoform 2 of Transcription factor 25 OS=Mus musculus GN=Tcf25|Isoform 3 of Transcription factor 25 OS=Mus musculus GN=Tcf25|Isoform 5 of Transcription factor 25 OS=Mus musculus GN=Tcf25	3	2	-0.214396	0.0731183	0.332124	DKO_1 - WT	no hit
Nol8	E9QKD1|Q3UHX0	Nucleolar protein 8 OS=Mus musculus GN=Nol8 PE=1 SV=1|Nucleolar protein 8 OS=Mus musculus GN=Nol8 PE=1 SV=2	3	2	-0.214322	0.0634655	0.315238	(DKO_1 - WT) - (DKO_2 - WT)	no hit
Mtx1	F7C846|G3XA75|P47802	Metaxin-1 OS=Mus musculus GN=Mtx1 PE=1 SV=1|Metaxin-1 (Fragment) OS=Mus musculus GN=Mtx1 PE=1 SV=1|Metaxin-1 OS=Mus musculus GN=Mtx1 PE=1 SV=1	3	2	-0.214064	0.105997	0.391129	DKO_1 - WT	no hit
Tma7	Q14A47|Q8K003	Coiled-coil domain containing 72 OS=Mus musculus GN=Tma7 PE=1 SV=1|Translation machinery-associated protein 7 OS=Mus musculus GN=Tma7 PE=3 SV=1	3	2	-0.214047	0.0973265	0.376256	DKO_1 - WT	no hit
Tmem230	Q8CIB6	Transmembrane protein 230 OS=Mus musculus GN=Tmem230 PE=1 SV=1	3	2	-0.213989	0.0620788	0.965486	DKO_2 - WT	no hit
Pmm1	O35621|Q545Q8	Phosphomannomutase 1 OS=Mus musculus GN=Pmm1 PE=1 SV=1|Phosphomannomutase OS=Mus musculus GN=Pmm1 PE=1 SV=1	3	2	-0.213983	0.104063	0.389305	DKO_1 - WT	no hit
Tomm22	Q9CPQ3	Mitochondrial import receptor subunit TOM22 homolog OS=Mus musculus GN=Tomm22 PE=1 SV=3	3	2	-0.213742	0.0668766	0.970122	DKO_2 - WT	no hit
Aars2	Q14CH7	Alanine--tRNA ligase, mitochondrial OS=Mus musculus GN=Aars2 PE=1 SV=1	3	2	-0.213705	0.0772235	0.342412	DKO_1 - WT	no hit
Spry4	Q9WTP2	Protein sprouty homolog 4 OS=Mus musculus GN=Spry4 PE=2 SV=1	3	2	-0.213705	0.0809071	0.345593	DKO_1 - WT	no hit
Itga9	B8JK39	Integrin alpha-9 OS=Mus musculus GN=Itga9 PE=1 SV=1	3	2	-0.213547	0.067766	0.970414	DKO_2 - WT	no hit
Snrpf	P62307|Q497K3	Small nuclear ribonucleoprotein F OS=Mus musculus GN=Snrpf PE=1 SV=1|MCG4969 OS=Mus musculus GN=Snrpf PE=1 SV=1	3	2	-0.213506	0.0630376	0.965486	DKO_2 - WT	no hit
Rad51	D6RCK1|Q08297	DNA repair protein RAD51 homolog 1 OS=Mus musculus GN=Rad51 PE=1 SV=1|DNA repair protein RAD51 homolog 1 OS=Mus musculus GN=Rad51 PE=1 SV=1	3	2	-0.213497	0.0626267	0.313472	(DKO_1 - WT) - (DKO_2 - WT)	no hit
Scaf11	E9PZM7	Protein Scaf11 OS=Mus musculus GN=Scaf11 PE=1 SV=1	3	2	-0.213472	0.116152	0.999773	DKO_2 - WT	no hit
Ftl1	P29391|Q9CPX4	Ferritin light chain 1 OS=Mus musculus GN=Ftl1 PE=1 SV=2|Ferritin OS=Mus musculus GN=Ftl1 PE=1 SV=1	3	2	-0.213161	0.0919301	0.999773	DKO_2 - WT	no hit
Ksr2	M0QW59|Q3UVC0	Kinase suppressor of Ras 2 OS=Mus musculus GN=Ksr2 PE=1 SV=1|Kinase suppressor of Ras 2 OS=Mus musculus GN=Ksr2 PE=1 SV=2	3	2	-0.213085	0.0819975	0.364327	(DKO_1 - WT) - (DKO_2 - WT)	no hit
Fcf1	E9Q186|Q9CTH6	rRNA-processing protein FCF1 homolog OS=Mus musculus GN=Fcf1 PE=1 SV=1|rRNA-processing protein FCF1 homolog OS=Mus musculus GN=Fcf1 PE=2 SV=2	3	2	-0.212903	0.0583462	0.304499	(DKO_1 - WT) - (DKO_2 - WT)	no hit
Psph	Q99LS3	Phosphoserine phosphatase OS=Mus musculus GN=Psph PE=1 SV=1	3	2	-0.212696	0.211587	0.526371	DKO_1 - WT	no hit
Hdhd2|Ier3ip1	D6RI20|Q9CR20	Haloacid dehalogenase-like hydrolase domain-containing protein 2 OS=Mus musculus GN=Hdhd2 PE=4 SV=1|Immediate early response 3-interacting protein 1 OS=Mus musculus GN=Ier3ip1 PE=3 SV=1	3	2	-0.212645	0.268231	0.609732	(DKO_1 - WT) - (DKO_2 - WT)	no hit
Atp7a	A2AG68|Q64430	Copper-transporting ATPase 1 OS=Mus musculus GN=Atp7a PE=1 SV=1|Copper-transporting ATPase 1 OS=Mus musculus GN=Atp7a PE=1 SV=3	3	2	-0.212614	0.0636735	0.31571	(DKO_1 - WT) - (DKO_2 - WT)	no hit
Tes	Q3ULB1|Q921W7	Testin OS=Mus musculus GN=Tes PE=1 SV=1|Putative uncharacterized protein Tes OS=Mus musculus GN=Tes PE=1 SV=2	3	2	-0.21259	0.0579573	0.296827	DKO_1 - WT	no hit
Lxn	P70202|Q14BZ3	Latexin OS=Mus musculus GN=Lxn PE=1 SV=2|Latexin OS=Mus musculus GN=Lxn PE=1 SV=1	3	2	-0.212581	0.0755128	0.977137	DKO_2 - WT	no hit
Rnf130	Q5SVR5|Q8VEM1	E3 ubiquitin-protein ligase RNF130 OS=Mus musculus GN=Rnf130 PE=1 SV=1|E3 ubiquitin-protein ligase RNF130 OS=Mus musculus GN=Rnf130 PE=2 SV=1	3	2	-0.212577	0.16396	0.999773	DKO_2 - WT	no hit
Serinc1	A9CLV6|Q9QZI8	Axotomy induced glycoprotein 2 OS=Mus musculus GN=Serinc1 PE=1 SV=1|Serine incorporator 1 OS=Mus musculus GN=Serinc1 PE=1 SV=1	3	2	-0.212527	0.0874273	0.358996	DKO_1 - WT	no hit
Pfkfb3	A0A0A6YY64|A2AUP1|A2AUP3|A2AUP4|A2AUP5|A7UAK5|A7UAK8|Q3U3S6|Q7TS91	Protein Pfkfb3 OS=Mus musculus GN=Pfkfb3 PE=1 SV=1|Protein Pfkfb3 OS=Mus musculus GN=Pfkfb3 PE=1 SV=1|Protein Pfkfb3 OS=Mus musculus GN=Pfkfb3 PE=1 SV=1|Protein Pfkfb3 OS=Mus musculus GN=Pfkfb3 PE=1 SV=1|6-phosphofructo-2-kinase/fructose-2, 6-biphosphatase 3 splice variant 3 OS=Mus musculus GN=Pfkfb3 PE=1 SV=2|6-phosphofructo-2-kinase/fructose-2, 6-biphosphatase 3 splice variant 2 OS=Mus musculus…	3	2	-0.212516	0.0771058	0.353238	(DKO_1 - WT) - (DKO_2 - WT)	no hit
Thsd7a	E9PWD2|E9QNR5|Q69ZU6	Thrombospondin type-1 domain-containing protein 7A OS=Mus musculus GN=Thsd7a PE=1 SV=1|Thrombospondin type-1 domain-containing protein 7A OS=Mus musculus GN=Thsd7a PE=1 SV=2|Thrombospondin type-1 domain-containing protein 7A OS=Mus musculus GN=Thsd7a PE=1 SV=2	3	2	-0.212469	0.0949837	0.372744	DKO_1 - WT	no hit
Spata2	Q3UML2|Q8K004	Protein Spata2 OS=Mus musculus GN=Spata2 PE=1 SV=1|Protein Spata2 OS=Mus musculus GN=Spata2 PE=1 SV=1	3	2	-0.212341	0.0640485	0.316679	(DKO_1 - WT) - (DKO_2 - WT)	no hit
Zcchc9	Q8R1J3	Zinc finger CCHC domain-containing protein 9 OS=Mus musculus GN=Zcchc9 PE=2 SV=2	3	2	-0.212334	0.0631192	0.965486	DKO_2 - WT	no hit
Echdc2	Q3TLP5	Enoyl-CoA hydratase domain-containing protein 2, mitochondrial OS=Mus musculus GN=Echdc2 PE=1 SV=2	3	2	-0.21225	0.0781037	0.985355	DKO_2 - WT	no hit
Rpl4	Q564E8|Q9D8E6	60S ribosomal protein L4 OS=Mus musculus GN=Rpl4 PE=1 SV=1|60S ribosomal protein L4 OS=Mus musculus GN=Rpl4 PE=1 SV=3	3	2	-0.212004	0.148092	0.999773	DKO_2 - WT	no hit
Dad1	P61804	Dolichyl-diphosphooligosaccharide--protein glycosyltransferase subunit DAD1 OS=Mus musculus GN=Dad1 PE=1 SV=3	3	2	-0.211988	0.0622262	0.305573	DKO_1 - WT	no hit
Neo1	E9QK04	Neogenin OS=Mus musculus GN=Neo1 PE=1 SV=1	3	2	-0.211903	0.064755	0.313188	DKO_1 - WT	no hit
Tspyl5	Q69ZB3	Testis-specific Y-encoded-like protein 5 OS=Mus musculus GN=Tspyl5 PE=2 SV=2	3	2	-0.211809	0.0750733	0.336559	DKO_1 - WT	no hit
Phax	G5E8V8|Q9JJT9	Phosphorylated adapter RNA export protein OS=Mus musculus GN=Phax PE=1 SV=1|Phosphorylated adapter RNA export protein OS=Mus musculus GN=Phax PE=1 SV=1	3	2	-0.211808	0.167779	0.502486	(DKO_1 - WT) - (DKO_2 - WT)	no hit
Slc22a23	F7BP73|Q3UHH2	Solute carrier family 22 member 23 (Fragment) OS=Mus musculus GN=Slc22a23 PE=1 SV=1|Solute carrier family 22 member 23 OS=Mus musculus GN=Slc22a23 PE=2 SV=1	3	2	-0.21179	0.0580479	0.30343	(DKO_1 - WT) - (DKO_2 - WT)	no hit
Usp4	A0A0A6YW28|P35123	Ubiquitin carboxyl-terminal hydrolase 4 OS=Mus musculus GN=Usp4 PE=1 SV=1|Ubiquitin carboxyl-terminal hydrolase 4 OS=Mus musculus GN=Usp4 PE=1 SV=3	3	2	-0.211749	0.0815699	0.346072	DKO_1 - WT	no hit
Lrrn1	Q61809	Leucine-rich repeat neuronal protein 1 OS=Mus musculus GN=Lrrn1 PE=2 SV=1	3	2	-0.211734	0.122456	0.415685	DKO_1 - WT	no hit
Fat1	F2Z4A3	Protein Fat1 OS=Mus musculus GN=Fat1 PE=1 SV=1	3	2	-0.211692	0.10037	0.400002	(DKO_1 - WT) - (DKO_2 - WT)	no hit
Rap1a	A0A0G2JE52|P62835	Ras-related protein Rap-1A OS=Mus musculus GN=Rap1a PE=1 SV=1|Ras-related protein Rap-1A OS=Mus musculus GN=Rap1a PE=1 SV=1	3	2	-0.211674	0.252643	0.597687	(DKO_1 - WT) - (DKO_2 - WT)	no hit
Ccdc50	Q810U5	Coiled-coil domain-containing protein 50 OS=Mus musculus GN=Ccdc50 PE=1 SV=1	3	2	-0.211641	0.0698339	0.32637	DKO_1 - WT	no hit
Znhit1	A0A0R4J1S6|D3YZ33|D3YZ34|D3Z017|G8JL39|Q8R331	Zinc finger HIT domain-containing protein 1 OS=Mus musculus GN=Znhit1 PE=1 SV=1|Zinc finger HIT domain-containing protein 1 OS=Mus musculus GN=Znhit1 PE=1 SV=1|Zinc finger HIT domain-containing protein 1 OS=Mus musculus GN=Znhit1 PE=1 SV=1|Zinc finger HIT domain-containing protein 1 (Fragment) OS=Mus musculus GN=Znhit1 PE=1 SV=1|Zinc finger HIT domain-containing protein 1 (Fragment) OS=Mus muscul…	3	2	-0.211595	0.0810476	0.360848	(DKO_1 - WT) - (DKO_2 - WT)	no hit
Katnal1	Q8K0T4	Katanin p60 ATPase-containing subunit A-like 1 OS=Mus musculus GN=Katnal1 PE=1 SV=1	3	2	-0.211529	0.111221	0.401074	DKO_1 - WT	no hit
Csrp1	P97315|Q4FJX4	Cysteine and glycine-rich protein 1 OS=Mus musculus GN=Csrp1 PE=1 SV=3|Csrp1 protein OS=Mus musculus GN=Csrp1 PE=1 SV=1	3	2	-0.211472	0.118694	0.999773	DKO_2 - WT	no hit
Rufy2	B2RQ36|Q8R4C2	RUN and FYVE domain-containing 2 OS=Mus musculus GN=Rufy2 PE=1 SV=1|RUN and FYVE domain-containing protein 2 OS=Mus musculus GN=Rufy2 PE=1 SV=2	3	2	-0.211418	0.0574391	0.302045	(DKO_1 - WT) - (DKO_2 - WT)	no hit
Ndufs3	Q9DCT2	NADH dehydrogenase [ubiquinone] iron-sulfur protein 3, mitochondrial OS=Mus musculus GN=Ndufs3 PE=1 SV=2	3	2	-0.211401	0.0657709	0.314875	DKO_1 - WT	no hit
Nup62	Q5FWJ9|Q63850	Nuclear pore glycoprotein p62 OS=Mus musculus GN=Nup62 PE=1 SV=1|Nuclear pore glycoprotein p62 OS=Mus musculus GN=Nup62 PE=1 SV=2	3	2	-0.211362	0.0569152	0.295331	DKO_1 - WT	no hit
Arl5a	Q498A0|Q80ZU0	ADP-ribosylation factor-like 5A OS=Mus musculus GN=Arl5a PE=1 SV=1|ADP-ribosylation factor-like protein 5A OS=Mus musculus GN=Arl5a PE=1 SV=1	3	2	-0.211351	0.0729312	0.341839	(DKO_1 - WT) - (DKO_2 - WT)	no hit
Capn1	O35350|Q3TI07	Calpain-1 catalytic subunit OS=Mus musculus GN=Capn1 PE=1 SV=1|Calpain-1 catalytic subunit OS=Mus musculus GN=Capn1 PE=1 SV=1	3	2	-0.211336	0.0583783	0.963731	DKO_2 - WT	no hit
Grsf1	Q8C5Q4	G-rich sequence factor 1 OS=Mus musculus GN=Grsf1 PE=1 SV=2	3	2	-0.211263	0.0577375	0.302295	(DKO_1 - WT) - (DKO_2 - WT)	no hit
Haus8	Q99L00|Q99L00-2	HAUS augmin-like complex subunit 8 OS=Mus musculus GN=Haus8 PE=1 SV=2|Isoform 2 of HAUS augmin-like complex subunit 8 OS=Mus musculus GN=Haus8	3	2	-0.211249	0.0585058	0.963731	DKO_2 - WT	no hit
Robo3	D3Z4M6|E9QPQ1|Q9Z2I4|Q9Z2I4-2	Roundabout homolog 3 OS=Mus musculus GN=Robo3 PE=1 SV=1|Roundabout homolog 3 OS=Mus musculus GN=Robo3 PE=1 SV=1|Roundabout homolog 3 OS=Mus musculus GN=Robo3 PE=1 SV=2|Isoform 2 of Roundabout homolog 3 OS=Mus musculus GN=Robo3	3	2	-0.211226	0.0888017	0.378984	(DKO_1 - WT) - (DKO_2 - WT)	no hit
Rrp8	E9PVA2|Q9DB85	Ribosomal RNA-processing protein 8 OS=Mus musculus GN=Rrp8 PE=1 SV=1|Ribosomal RNA-processing protein 8 OS=Mus musculus GN=Rrp8 PE=1 SV=1	3	2	-0.211219	0.109382	0.415635	(DKO_1 - WT) - (DKO_2 - WT)	no hit
Gopc	K3W4Q9|Q8BH60|Q8BH60-2	Golgi-associated PDZ and coiled-coil motif-containing protein OS=Mus musculus GN=Gopc PE=1 SV=1|Golgi-associated PDZ and coiled-coil motif-containing protein OS=Mus musculus GN=Gopc PE=1 SV=1|Isoform 2 of Golgi-associated PDZ and coiled-coil motif-containing protein OS=Mus musculus GN=Gopc	3	2	-0.211213	0.0640971	0.311575	DKO_1 - WT	no hit
Fat1	F2Z4A3	Protein Fat1 OS=Mus musculus GN=Fat1 PE=1 SV=1	3	2	-0.210923	0.101457	0.999773	DKO_2 - WT	no hit
Myof	E9Q390|Q69ZN7|Q69ZN7-4	Myoferlin OS=Mus musculus GN=Myof PE=1 SV=2|Myoferlin OS=Mus musculus GN=Myof PE=1 SV=2|Isoform 4 of Myoferlin OS=Mus musculus GN=Myof	3	2	-0.210913	0.0639113	0.965486	DKO_2 - WT	no hit
Bcor	Q8CGN4|Q8CGN4-2|Q8CGN4-3|Q8CGN4-4	BCL-6 corepressor OS=Mus musculus GN=Bcor PE=1 SV=2|Isoform 2 of BCL-6 corepressor OS=Mus musculus GN=Bcor|Isoform 3 of BCL-6 corepressor OS=Mus musculus GN=Bcor|Isoform 4 of BCL-6 corepressor OS=Mus musculus GN=Bcor	3	2	-0.210825	0.0612652	0.30338	DKO_1 - WT	no hit
Dgat1	Q54AA6|Q9Z2A7	O-acyltransferase OS=Mus musculus GN=Dgat1 PE=1 SV=1|Diacylglycerol O-acyltransferase 1 OS=Mus musculus GN=Dgat1 PE=1 SV=1	3	2	-0.210822	0.0738232	0.977137	DKO_2 - WT	no hit
Ivd	Q9JHI5	Isovaleryl-CoA dehydrogenase, mitochondrial OS=Mus musculus GN=Ivd PE=1 SV=1	3	2	-0.210749	0.0777152	0.985355	DKO_2 - WT	no hit
Mapt	A0A0A0MQC7|A2A5Y6|B1AQW2|P10637|P10637-4|P10637-5	Microtubule-associated protein OS=Mus musculus GN=Mapt PE=1 SV=1|Microtubule-associated protein OS=Mus musculus GN=Mapt PE=1 SV=1|Microtubule-associated protein OS=Mus musculus GN=Mapt PE=1 SV=1|Microtubule-associated protein tau OS=Mus musculus GN=Mapt PE=1 SV=3|Isoform Tau-C of Microtubule-associated protein tau OS=Mus musculus GN=Mapt|Isoform Tau-D of Microtubule-associated protein tau OS=Mus …	3	2	-0.210685	0.157523	0.489764	(DKO_1 - WT) - (DKO_2 - WT)	no hit
Tspan14	Q8QZY6	Tetraspanin-14 OS=Mus musculus GN=Tspan14 PE=1 SV=1	3	2	-0.210569	0.134154	0.45583	(DKO_1 - WT) - (DKO_2 - WT)	no hit
Phf3	B2RQG2	PHD finger protein 3 OS=Mus musculus GN=Phf3 PE=1 SV=1	3	2	-0.210546	0.0827749	0.998068	DKO_2 - WT	no hit
Rfc1	A0A0N5E9G7|G3UWX1|G3X8Z6|Q5U4B1	Replication factor C subunit 1 OS=Mus musculus GN=Rfc1 PE=1 SV=1|Replication factor C subunit 1 OS=Mus musculus GN=Rfc1 PE=1 SV=2|Replication factor C 1, isoform CRA_c OS=Mus musculus GN=Rfc1 PE=1 SV=1|Replication factor C subunit 1 OS=Mus musculus GN=Rfc1 PE=1 SV=1	3	2	-0.210531	0.0632769	0.314871	(DKO_1 - WT) - (DKO_2 - WT)	no hit
Gng12	A0A0N4SVT3|A0A0N4SW28|Q9DAS9	Guanine nucleotide-binding protein subunit gamma (Fragment) OS=Mus musculus GN=Gng12 PE=1 SV=1|Guanine nucleotide-binding protein subunit gamma OS=Mus musculus GN=Gng12 PE=1 SV=1|Guanine nucleotide-binding protein G(I)/G(S)/G(O) subunit gamma-12 OS=Mus musculus GN=Gng12 PE=1 SV=3	3	2	-0.210498	0.0593856	0.963731	DKO_2 - WT	no hit
Rpl7a	P12970|Q58ET1	60S ribosomal protein L7a OS=Mus musculus GN=Rpl7a PE=1 SV=2|60S ribosomal protein L7a OS=Mus musculus GN=Rpl7a PE=1 SV=1	3	2	-0.210324	0.0705103	0.974338	DKO_2 - WT	no hit
Pex3	E9QA46|Q3UIG2|Q9QXY9	Peroxisomal biogenesis factor 3 OS=Mus musculus GN=Pex3 PE=1 SV=1|Peroxisomal biogenesis factor 3 OS=Mus musculus GN=Pex3 PE=1 SV=1|Peroxisomal biogenesis factor 3 OS=Mus musculus GN=Pex3 PE=1 SV=1	3	2	-0.210298	0.0611896	0.30338	DKO_1 - WT	no hit
Ufc1	Q9CR09	Ubiquitin-fold modifier-conjugating enzyme 1 OS=Mus musculus GN=Ufc1 PE=1 SV=1	3	2	-0.210235	0.0819845	0.346659	DKO_1 - WT	no hit
Pcdh19	E9Q5E1|Q80TF3	Protocadherin-19 OS=Mus musculus GN=Pcdh19 PE=1 SV=1|Protocadherin-19 OS=Mus musculus GN=Pcdh19 PE=1 SV=3	3	2	-0.210199	0.0655507	0.314776	DKO_1 - WT	no hit
Cacna2d1	E9Q1X8|O08532|O08532-2|O08532-3|O08532-4|O08532-5	Voltage-dependent calcium channel subunit alpha-2/delta-1 OS=Mus musculus GN=Cacna2d1 PE=1 SV=2|Voltage-dependent calcium channel subunit alpha-2/delta-1 OS=Mus musculus GN=Cacna2d1 PE=1 SV=1|Isoform 2B of Voltage-dependent calcium channel subunit alpha-2/delta-1 OS=Mus musculus GN=Cacna2d1|Isoform 2C of Voltage-dependent calcium channel subunit alpha-2/delta-1 OS=Mus musculus GN=Cacna2d1|Isoform…	3	2	-0.210194	0.0758864	0.349627	(DKO_1 - WT) - (DKO_2 - WT)	no hit
Uba5	Q8VE47	Ubiquitin-like modifier-activating enzyme 5 OS=Mus musculus GN=Uba5 PE=1 SV=2	3	2	-0.210158	0.146831	0.471589	(DKO_1 - WT) - (DKO_2 - WT)	no hit
Srrm1	A2A8V8|A2A8V9|E9PUK6|F6T4M4|Q52KI8	Serine/arginine repetitive matrix protein 1 OS=Mus musculus GN=Srrm1 PE=1 SV=1|Serine/arginine repetitive matrix protein 1 OS=Mus musculus GN=Srrm1 PE=1 SV=1|Serine/arginine repetitive matrix protein 1 OS=Mus musculus GN=Srrm1 PE=1 SV=1|Serine/arginine repetitive matrix protein 1 (Fragment) OS=Mus musculus GN=Srrm1 PE=1 SV=1|Serine/arginine repetitive matrix protein 1 OS=Mus musculus GN=Srrm1 PE=…	3	2	-0.210127	0.100497	0.381467	DKO_1 - WT	no hit
Rdh14	Q9ERI6	Retinol dehydrogenase 14 OS=Mus musculus GN=Rdh14 PE=1 SV=1	3	2	-0.210049	0.0716327	0.338506	(DKO_1 - WT) - (DKO_2 - WT)	no hit
Fkbp10	Q61576	Peptidyl-prolyl cis-trans isomerase FKBP10 OS=Mus musculus GN=Fkbp10 PE=1 SV=2	3	2	-0.210009	0.0587927	0.963731	DKO_2 - WT	no hit
Ahcyl1	Q80SW1	Putative adenosylhomocysteinase 2 OS=Mus musculus GN=Ahcyl1 PE=1 SV=1	3	2	-0.209913	0.0904344	0.381684	(DKO_1 - WT) - (DKO_2 - WT)	no hit
Itga5	P11688	Integrin alpha-5 OS=Mus musculus GN=Itga5 PE=1 SV=3	3	2	-0.209895	0.085079	0.353645	DKO_1 - WT	no hit
Reln	Q60841|Q60841-2|Q60841-3	Reelin OS=Mus musculus GN=Reln PE=1 SV=3|Isoform 2 of Reelin OS=Mus musculus GN=Reln|Isoform 3 of Reelin OS=Mus musculus GN=Reln	3	2	-0.209844	0.0651475	0.313743	DKO_1 - WT	no hit
Supt16	G3X956	FACT complex subunit SPT16 OS=Mus musculus GN=Supt16 PE=1 SV=1	3	2	-0.209802	0.0743765	0.335522	DKO_1 - WT	no hit
Tmem167b	Q80X45	Protein kish-B OS=Mus musculus GN=Tmem167b PE=3 SV=1	3	2	-0.209694	0.117402	0.42974	(DKO_1 - WT) - (DKO_2 - WT)	no hit
St5	Q924W7	Suppression of tumorigenicity 5 protein OS=Mus musculus GN=St5 PE=1 SV=1	3	2	-0.209642	0.0646656	0.318454	(DKO_1 - WT) - (DKO_2 - WT)	no hit
Bphl	Q8R164	Valacyclovir hydrolase OS=Mus musculus GN=Bphl PE=1 SV=1	3	2	-0.20957	0.0605554	0.302172	DKO_1 - WT	no hit
Iqgap3	F8VQ29	Protein Iqgap3 OS=Mus musculus GN=Iqgap3 PE=1 SV=1	3	2	-0.209556	0.0644161	0.312074	DKO_1 - WT	no hit
Uap1	A0A0R4J085|A0A0R4J1F6|Q3UHZ7|Q91YN5|Q91YN5-2|Q91YN5-3	UDP-N-acetylhexosamine pyrophosphorylase OS=Mus musculus GN=Uap1 PE=1 SV=1|UDP-N-acetylhexosamine pyrophosphorylase OS=Mus musculus GN=Uap1 PE=1 SV=1|UDP-N-acetylhexosamine pyrophosphorylase OS=Mus musculus GN=Uap1 PE=1 SV=1|UDP-N-acetylhexosamine pyrophosphorylase OS=Mus musculus GN=Uap1 PE=1 SV=1|Isoform AGX1 of UDP-N-acetylhexosamine pyrophosphorylase OS=Mus musculus GN=Uap1|Isoform 3 of UDP-N…	3	2	-0.20923	0.113497	0.404503	DKO_1 - WT	no hit
Pard6g	Q9JK84	Partitioning defective 6 homolog gamma OS=Mus musculus GN=Pard6g PE=2 SV=1	3	2	-0.209202	0.0766264	0.351331	(DKO_1 - WT) - (DKO_2 - WT)	no hit
Dnajb4	Q9D832	DnaJ homolog subfamily B member 4 OS=Mus musculus GN=Dnajb4 PE=1 SV=1	3	2	-0.209192	0.0616801	0.311957	(DKO_1 - WT) - (DKO_2 - WT)	no hit
Siae	P70665|P70665-2	Sialate O-acetylesterase OS=Mus musculus GN=Siae PE=1 SV=3|Isoform 2 of Sialate O-acetylesterase OS=Mus musculus GN=Siae	3	2	-0.209112	0.215902	0.558438	(DKO_1 - WT) - (DKO_2 - WT)	no hit
Aurkb	O70126	Aurora kinase B OS=Mus musculus GN=Aurkb PE=1 SV=2	3	2	-0.209088	0.0625001	0.313322	(DKO_1 - WT) - (DKO_2 - WT)	no hit
Fis1	G3X9U9|Q9CQ92	Fission 1 (Mitochondrial outer membrane) homolog (Yeast), isoform CRA_c OS=Mus musculus GN=Fis1 PE=1 SV=1|Mitochondrial fission 1 protein OS=Mus musculus GN=Fis1 PE=1 SV=1	3	2	-0.209056	0.0759607	0.977137	DKO_2 - WT	no hit
Lama5	Q61001	Laminin subunit alpha-5 OS=Mus musculus GN=Lama5 PE=1 SV=4	3	2	-0.209017	0.0590056	0.299272	DKO_1 - WT	no hit
Zdhhc18	Q5Y5T2	Palmitoyltransferase ZDHHC18 OS=Mus musculus GN=Zdhhc18 PE=1 SV=4	3	2	-0.208818	0.0827418	0.348644	DKO_1 - WT	no hit
Luzp1	Q8R4U7	Leucine zipper protein 1 OS=Mus musculus GN=Luzp1 PE=1 SV=2	3	2	-0.208707	0.126458	0.445834	(DKO_1 - WT) - (DKO_2 - WT)	no hit
Map3k12	Q60700	Mitogen-activated protein kinase kinase kinase 12 OS=Mus musculus GN=Map3k12 PE=1 SV=1	3	2	-0.208661	0.0822823	0.365092	(DKO_1 - WT) - (DKO_2 - WT)	no hit
Smap	Q9R0P4	Small acidic protein OS=Mus musculus GN=Smap PE=1 SV=1	3	2	-0.208537	0.0680376	0.328637	(DKO_1 - WT) - (DKO_2 - WT)	no hit
Epg5	Q80TA9	Ectopic P granules protein 5 homolog OS=Mus musculus GN=Epg5 PE=1 SV=2	3	2	-0.208266	0.0756905	0.337924	DKO_1 - WT	no hit
Cend1	Q9JKC6	Cell cycle exit and neuronal differentiation protein 1 OS=Mus musculus GN=Cend1 PE=1 SV=1	3	2	-0.208172	0.157259	0.465652	DKO_1 - WT	no hit
Nbr1	A1L329|A2A4N5|A2A4N7|F6S397|K3W4P1|P97432|Q05BC8	Neighbor of Brca1 gene 1 OS=Mus musculus GN=Nbr1 PE=1 SV=1|Next to BRCA1 gene 1 protein OS=Mus musculus GN=Nbr1 PE=1 SV=1|Next to BRCA1 gene 1 protein OS=Mus musculus GN=Nbr1 PE=1 SV=1|Next to BRCA1 gene 1 protein (Fragment) OS=Mus musculus GN=Nbr1 PE=1 SV=1|Next to BRCA1 gene 1 protein OS=Mus musculus GN=Nbr1 PE=1 SV=1|Next to BRCA1 gene 1 protein OS=Mus musculus GN=Nbr1 PE=1 SV=1|Nbr1 protein O…	3	2	-0.208066	0.101815	0.384891	DKO_1 - WT	no hit
Tbrg4	Q91YM4|Q91YM4-2	Protein TBRG4 OS=Mus musculus GN=Tbrg4 PE=1 SV=1|Isoform 2 of Protein TBRG4 OS=Mus musculus GN=Tbrg4	3	2	-0.20799	0.0641654	0.316774	(DKO_1 - WT) - (DKO_2 - WT)	no hit
Col11a1	Q61245|Q61245-2	Collagen alpha-1(XI) chain OS=Mus musculus GN=Col11a1 PE=1 SV=2|Isoform Short of Collagen alpha-1(XI) chain OS=Mus musculus GN=Col11a1	3	2	-0.207944	0.114647	0.999773	DKO_2 - WT	no hit
Plk1	Q07832|Q3TPZ2	Serine/threonine-protein kinase PLK1 OS=Mus musculus GN=Plk1 PE=1 SV=2|Serine/threonine-protein kinase PLK OS=Mus musculus GN=Plk1 PE=1 SV=1	3	2	-0.207843	0.0708185	0.974338	DKO_2 - WT	no hit
Gpa33	A0A0R4J209|Q9JKA5	Cell surface A33 antigen OS=Mus musculus GN=Gpa33 PE=1 SV=1|Cell surface A33 antigen OS=Mus musculus GN=Gpa33 PE=2 SV=2	3	2	-0.207825	0.0698826	0.32637	DKO_1 - WT	no hit
Ssu72	Q9CY97|Q9CY97-2	RNA polymerase II subunit A C-terminal domain phosphatase SSU72 OS=Mus musculus GN=Ssu72 PE=1 SV=1|Isoform 2 of RNA polymerase II subunit A C-terminal domain phosphatase SSU72 OS=Mus musculus GN=Ssu72	3	2	-0.207787	0.140789	0.443779	DKO_1 - WT	no hit
Notch3	Q61982	Neurogenic locus notch homolog protein 3 OS=Mus musculus GN=Notch3 PE=1 SV=1	3	2	-0.207709	0.095376	0.373388	DKO_1 - WT	no hit
Aldh3a2	B1ATI0|B1AV77|P47740	Aldehyde dehydrogenase OS=Mus musculus GN=Aldh3a2 PE=1 SV=1|Aldehyde dehydrogenase OS=Mus musculus GN=Aldh3a2 PE=1 SV=1|Fatty aldehyde dehydrogenase OS=Mus musculus GN=Aldh3a2 PE=1 SV=2	3	2	-0.207635	0.121139	0.999773	DKO_2 - WT	no hit
Tmem214	Q8BM55	Transmembrane protein 214 OS=Mus musculus GN=Tmem214 PE=1 SV=1	3	2	-0.20759	0.0841299	0.35278	DKO_1 - WT	no hit
Gnai2	P08752	Guanine nucleotide-binding protein G(i) subunit alpha-2 OS=Mus musculus GN=Gnai2 PE=1 SV=5	3	2	-0.207567	0.0620174	0.304778	DKO_1 - WT	no hit
Surf6	P70279|Q3V1X4	Surfeit locus protein 6 OS=Mus musculus GN=Surf6 PE=1 SV=1|Surfeit gene 6, isoform CRA_a OS=Mus musculus GN=Surf6 PE=1 SV=1	3	2	-0.207283	0.0989802	0.999773	DKO_2 - WT	no hit
Q922M7	Q922M7	Ashwin OS=Mus musculus PE=1 SV=1	3	2	-0.207145	0.0674007	0.970122	DKO_2 - WT	no hit
Slc25a24	Q8BMD8	Calcium-binding mitochondrial carrier protein SCaMC-1 OS=Mus musculus GN=Slc25a24 PE=1 SV=1	3	2	-0.207011	0.0905723	0.382017	(DKO_1 - WT) - (DKO_2 - WT)	no hit
Capn5	O08688|Q3TPL4	Calpain-5 OS=Mus musculus GN=Capn5 PE=1 SV=1|Calpain-5 OS=Mus musculus GN=Capn5 PE=1 SV=1	3	2	-0.207004	0.060772	0.965486	DKO_2 - WT	no hit
Serinc1	A9CLV6|Q9QZI8	Axotomy induced glycoprotein 2 OS=Mus musculus GN=Serinc1 PE=1 SV=1|Serine incorporator 1 OS=Mus musculus GN=Serinc1 PE=1 SV=1	3	2	-0.206946	0.0949169	0.38948	(DKO_1 - WT) - (DKO_2 - WT)	no hit
Tmem175	Q8BHJ8|Q9CXY1	Endosomal/lysomomal potassium channel TMEM175 OS=Mus musculus GN=Tmem175 PE=1 SV=1|Endosomal/lysomomal potassium channel TMEM175 OS=Mus musculus GN=Tmem175 PE=1 SV=2	3	2	-0.2069	0.0718155	0.330636	DKO_1 - WT	no hit
Q9CXL3	Q9CXL3	Uncharacterized protein C7orf50 homolog OS=Mus musculus PE=1 SV=3	3	2	-0.206876	0.0623363	0.965486	DKO_2 - WT	no hit
Fads2	Q9Z0R9	Fatty acid desaturase 2 OS=Mus musculus GN=Fads2 PE=1 SV=1	3	2	-0.20681	0.0649115	0.313188	DKO_1 - WT	no hit
Fv1	P70213	Friend virus susceptibility protein 1 OS=Mus musculus GN=Fv1 PE=4 SV=1	3	2	-0.20666	0.0627315	0.313512	(DKO_1 - WT) - (DKO_2 - WT)	no hit
AU018091	E9PWS4	Protein AU018091 OS=Mus musculus GN=AU018091 PE=1 SV=1	3	2	-0.206457	0.0688597	0.974338	DKO_2 - WT	no hit
Snx18	Q8C788	Sorting nexin OS=Mus musculus GN=Snx18 PE=1 SV=1	3	2	-0.206447	0.0724755	0.331613	DKO_1 - WT	no hit
Ralb	Q9JIW9	Ras-related protein Ral-B OS=Mus musculus GN=Ralb PE=1 SV=1	3	2	-0.206288	0.0641451	0.316774	(DKO_1 - WT) - (DKO_2 - WT)	no hit
[truncated: 17,464 more rows]

## Sheet: Selected targets
Related to Figure 1: Proteins selected with consitent expression levels in both DKO cell lines relative to WT. The values listed correspond to median log2 fold change over all replicates.
gene_name	DKO_1	DKO_2	WT
Trim3	0.23988	0.297524	1
Itm2a	0.422959	0.710836	1
Ackr3	0.449691	0.714618	1
Pcolce	0.45922	0.822484	1
Nfic	0.477714	0.744334	1
Vcam1	0.482793	0.726651	1
Tmem176b	0.503634	0.7872	1
Tgfbr2	0.505876	0.80803	1
Sparc	0.507055	0.849555	1
Tmem119	0.516736	0.812148	1
Pdgfra	0.531133	0.755931	1
Prrx1	0.535729	0.822787	1
Pcdh18	0.54306	0.778254	1
Npr3	0.545591	0.751656	1
Col1a1	0.547327	0.765336	1
Itm2c	0.558022	0.737718	1
Dlk1	0.558483	0.77363	1
Trim2	0.559756	0.723202	1
Pgm5	0.56601	0.808677	1
Pdgfrb	0.566345	0.788655	1
Mmp14	0.574343	0.835659	1
Epha3	0.575214	0.703874	1
Lima1	0.57914	0.789448	1
Nfib	0.58122	0.796203	1
Col3a1	0.59153	0.738567	1
Dab2	0.595518	0.724302	1
Ephb4	0.597199	0.811484	1
Slit3	0.600116	0.835867	1
Agtr2	0.605475	0.674703	1
Col1a2	0.605631	0.809831	1
Dnmt3l	0.614759	0.619349	1
Postn	0.615774	0.654716	1
Dpp4	0.61856	0.606621	1
Adgra2	0.620224	0.785774	1
Itm2b	0.621822	0.83323	1
Sema5a	0.626317	0.522525	1
Islr	0.632876	0.78242	1
Col5a1	0.633002	0.836378	1
Notch1	0.659572	0.712227	1
Col6a1	0.665621	0.818868	1
Cubn	0.771621	0.483418	1
Manba	1.39188	2.45453	1
Banf1	1.54613	1.35934	1
Hist3h2a|Hist1h2ah|Hist1h2ad|Hist1h2ab|Hist1h2af	1.82456	1.46576	1
Dhx32	2.36673	1.35125	1
Atp6v0c	2.90435	1.3669	1
