# Supplementary material for: Zinc-mediated regulation of TMEM106B function in the endolysosomal pathway revealed through the systematic identification of TRIM2/3 ubiquitination substrates
Source: Research Square preprint supplement (doi:10.21203/rs.3.rs-5037938/v1), 2024-09-30
Supplement: Supplementary file 2 [file 2347659d21d7c75b07331752.xlsx]

## Sheet: Description
Column name	Description
gene_name	Official gene symbol
protein_id	UniProt ID
description	Full entry name and description
log2FC(WT/dead)	log2(fold-change) in WT/catalytically dead TRIM comparison
p_value	p-value calcualted with LIMMA
fdr	false discovery rate calculated with LIMMA
hit_annotation	A protein is considered a ‘hit’ if the fdr < 0.05 and a fold-change of at least 2-fold is observed. A protein is considered a ‘candidate’ if the fdr is < 0.2 and a fold change of at least 1.5-fold is observed.
POI	Proteins of interest (POI = True) fulfilled the following criteria:
	i) |logFC| > 0.4, FDR < 0.05 in WT/catalytically dead comparison
	ii) i) |logFC| > 0.4, FDR < 0.05 in WT/BirA control comparison
	iii) they were not significantly different in the catalytically dead versus BirA control conditions

## Sheet: TRIM2 all
Quantitative MS in the identification of TRIM2 substrates
HEK 293-T cells were co-transfected with TRIM2 and ubiquitin. Substrates were enriched with streptavidin pull-downs.
gene_name	protein_id	description	log2FC(WT/dead)	p_value	fdr	hit_annotation	POI
PPP1R12A	O14974|O14974-2|O14974-4|O14974-5	Isoform 2 of Protein phosphatase 1 regulatory subunit 12A OS=Homo sapiens GN=PPP1R12A|Isoform 4 of Protein phosphatase 1 regulatory subunit 12A OS=Homo sapiens GN=PPP1R12A|Isoform 5 of Protein phosphatase 1 regulatory subunit 12A OS=Homo sapiens GN=PPP1R12A|Protein phosphatase 1 regulatory subunit 12A OS=Homo sapiens GN=PPP1R12A PE=1 SV=1	2.69533	2.61e-08	8.23e-05	enriched hit	TRUE
RABEP2	Q9H5N1|Q9H5N1-2	Rab GTPase-binding effector protein 2 OS=Homo sapiens GN=RABEP2 PE=1 SV=2|Isoform 2 of Rab GTPase-binding effector protein 2 OS=Homo sapiens GN=RABEP2	1.27114	0.000115509	0.0164842	enriched hit	TRUE
HMMR	O75330|O75330-2|O75330-3|O75330-4	Hyaluronan mediated motility receptor OS=Homo sapiens GN=HMMR PE=1 SV=2|Isoform 2 of Hyaluronan mediated motility receptor OS=Homo sapiens GN=HMMR|Isoform 3 of Hyaluronan mediated motility receptor OS=Homo sapiens GN=HMMR|Isoform 4 of Hyaluronan mediated motility receptor OS=Homo sapiens GN=HMMR	1.22821	6.99e-05	0.0129459	enriched hit	TRUE
FAM188A	Q9H8M7	Protein FAM188A OS=Homo sapiens GN=FAM188A PE=1 SV=1	1.21543	0.000286435	0.021469	enriched hit	TRUE
ITM2B	Q9Y287|Q9Y287-2	Integral membrane protein 2B OS=Homo sapiens GN=ITM2B PE=1 SV=1|Isoform 2 of Integral membrane protein 2B OS=Homo sapiens GN=ITM2B	1.15684	2.13e-05	0.00642149	enriched hit	TRUE
YARS	P54577	Tyrosine--tRNA ligase, cytoplasmic OS=Homo sapiens GN=YARS PE=1 SV=4	1.14446	0.000166478	0.0182303	enriched hit	TRUE
USP5	P45974|P45974-2	Ubiquitin carboxyl-terminal hydrolase 5 OS=Homo sapiens GN=USP5 PE=1 SV=2|Isoform Short of Ubiquitin carboxyl-terminal hydrolase 5 OS=Homo sapiens GN=USP5	1.05748	0.00150675	0.042685	enriched hit	TRUE
UBA1	P22314|P22314-2	Ubiquitin-like modifier-activating enzyme 1 OS=Homo sapiens GN=UBA1 PE=1 SV=3|Isoform 2 of Ubiquitin-like modifier-activating enzyme 1 OS=Homo sapiens GN=UBA1	0.986925	0.00973801	0.103649	enriched no hit	FALSE
FSD1	M0R366|Q9BTV5	Fibronectin type III and SPRY domain-containing protein 1 OS=Homo sapiens GN=FSD1 PE=1 SV=1|Fibronectin type III and SPRY domain-containing protein 1 OS=Homo sapiens GN=FSD1 PE=1 SV=1	0.982185	4.95e-06	0.00565042	enriched candidate	TRUE
UBE2C	A0A0A0MSE8|O00762|O00762-4	Ubiquitin-conjugating enzyme E2 C OS=Homo sapiens GN=UBE2C PE=1 SV=1|Ubiquitin-conjugating enzyme E2 C OS=Homo sapiens GN=UBE2C PE=1 SV=1|Isoform 4 of Ubiquitin-conjugating enzyme E2 C OS=Homo sapiens GN=UBE2C	0.971678	0.0254781	0.161704	no hit	FALSE
BMPR2	Q13873|Q13873-2	Bone morphogenetic protein receptor type-2 OS=Homo sapiens GN=BMPR2 PE=1 SV=2|Isoform 2 of Bone morphogenetic protein receptor type-2 OS=Homo sapiens GN=BMPR2	0.947916	5.38e-06	0.00565042	enriched candidate	TRUE
HGS	O14964	Hepatocyte growth factor-regulated tyrosine kinase substrate OS=Homo sapiens GN=HGS PE=1 SV=1	0.946687	0.000808631	0.0343996	enriched candidate	TRUE
TOX4	O94842|O94842-2|O94842-3	TOX high mobility group box family member 4 OS=Homo sapiens GN=TOX4 PE=1 SV=1|Isoform 2 of TOX high mobility group box family member 4 OS=Homo sapiens GN=TOX4|Isoform 3 of TOX high mobility group box family member 4 OS=Homo sapiens GN=TOX4	0.943102	0.00752498	0.0893911	no hit	FALSE
ZNF330	Q9Y3S2	Zinc finger protein 330 OS=Homo sapiens GN=ZNF330 PE=1 SV=1	0.930505	0.0137898	0.11936	no hit	FALSE
TRIM25	Q14258	E3 ubiquitin/ISG15 ligase TRIM25 OS=Homo sapiens GN=TRIM25 PE=1 SV=2	0.919814	2.2e-05	0.00642149	enriched candidate	TRUE
CALCOCO2	D6REB0|Q13137|Q13137-3|Q13137-4|Q13137-5	Calcium-binding and coiled-coil domain-containing protein 2 (Fragment) OS=Homo sapiens GN=CALCOCO2 PE=1 SV=1|Calcium-binding and coiled-coil domain-containing protein 2 OS=Homo sapiens GN=CALCOCO2 PE=1 SV=1|Isoform 3 of Calcium-binding and coiled-coil domain-containing protein 2 OS=Homo sapiens GN=CALCOCO2|Isoform 4 of Calcium-binding and coiled-coil domain-containing protein 2 OS=Homo sapiens GN…	0.917671	9.05e-05	0.0156378	enriched candidate	TRUE
WBP2	A6NG10|K7EIJ0|K7EMC9|K7ENL2|Q969T9	WW domain-binding protein 2 OS=Homo sapiens GN=WBP2 PE=1 SV=2|WW domain-binding protein 2 (Fragment) OS=Homo sapiens GN=WBP2 PE=1 SV=1|WW domain-binding protein 2 OS=Homo sapiens GN=WBP2 PE=1 SV=1|WW domain-binding protein 2 OS=Homo sapiens GN=WBP2 PE=1 SV=1|WW domain-binding protein 2 OS=Homo sapiens GN=WBP2 PE=1 SV=1	0.910424	0.00270271	0.0559745	no hit	FALSE
EPB41L5	Q9HCM4|Q9HCM4-3|Q9HCM4-4	Band 4.1-like protein 5 OS=Homo sapiens GN=EPB41L5 PE=1 SV=3|Isoform 3 of Band 4.1-like protein 5 OS=Homo sapiens GN=EPB41L5|Isoform 4 of Band 4.1-like protein 5 OS=Homo sapiens GN=EPB41L5	0.845423	0.00127417	0.0406476	candidate	FALSE
UBE2S	Q16763	Ubiquitin-conjugating enzyme E2 S OS=Homo sapiens GN=UBE2S PE=1 SV=2	0.831275	0.00877641	0.0977171	enriched no hit	FALSE
FAM98A	E9PH82|Q8NCA5|Q8NCA5-2	Isoform 2 of Protein FAM98A OS=Homo sapiens GN=FAM98A|Protein FAM98A OS=Homo sapiens GN=FAM98A PE=1 SV=1	0.823257	0.000604426	0.0293395	enriched candidate	TRUE
STAM2	O75886|O75886-2	Isoform 2 of Signal transducing adapter molecule 2 OS=Homo sapiens GN=STAM2|Signal transducing adapter molecule 2 OS=Homo sapiens GN=STAM2 PE=1 SV=1	0.779783	0.000586885	0.0293395	enriched candidate	TRUE
NBR1	B7Z5R6|Q14596|Q14596-2	Isoform 2 of Next to BRCA1 gene 1 protein OS=Homo sapiens GN=NBR1|Next to BRCA1 gene 1 protein OS=Homo sapiens GN=NBR1 PE=1 SV=1|Next to BRCA1 gene 1 protein OS=Homo sapiens GN=NBR1 PE=1 SV=3	0.760165	0.000519359	0.0293395	candidate	FALSE
TRAF3	A6NHG8|Q13114	TNF receptor-associated factor 3 OS=Homo sapiens GN=TRAF3 PE=1 SV=1|TNF receptor-associated factor 3 OS=Homo sapiens GN=TRAF3 PE=1 SV=2	0.75881	1.39e-05	0.00642149	enriched candidate	TRUE
MIB1	Q86YT6	E3 ubiquitin-protein ligase MIB1 OS=Homo sapiens GN=MIB1 PE=1 SV=1	0.758149	1.64e-05	0.00642149	enriched candidate	TRUE
STAM	Q92783|Q92783-2	Signal transducing adapter molecule 1 OS=Homo sapiens GN=STAM PE=1 SV=3|Isoform 2 of Signal transducing adapter molecule 1 OS=Homo sapiens GN=STAM	0.750325	0.000887442	0.0362814	enriched candidate	TRUE
SNF8	D6RBI1|D6RFY6|D6RJ86|H0Y8S5|Q96H20|Q96H20-2	Isoform 2 of Vacuolar-sorting protein SNF8 OS=Homo sapiens GN=SNF8|Vacuolar-sorting protein SNF8 (Fragment) OS=Homo sapiens GN=SNF8 PE=1 SV=1|Vacuolar-sorting protein SNF8 OS=Homo sapiens GN=SNF8 PE=1 SV=1	0.74868	0.000129477	0.0164842	enriched candidate	TRUE
TMEM106B	Q9NUM4	Transmembrane protein 106B OS=Homo sapiens GN=TMEM106B PE=1 SV=2	0.741387	0.000188669	0.0191449	enriched candidate	TRUE
AMOTL1	Q8IY63|Q8IY63-2	Angiomotin-like protein 1 OS=Homo sapiens GN=AMOTL1 PE=1 SV=1|Isoform 2 of Angiomotin-like protein 1 OS=Homo sapiens GN=AMOTL1	0.737108	0.00550602	0.0800955	enriched no hit	FALSE
CHIC2	D6RDW7|H0Y8H1|Q9UKJ5	Cysteine-rich hydrophobic domain-containing protein 2 (Fragment) OS=Homo sapiens GN=CHIC2 PE=1 SV=1|Cysteine-rich hydrophobic domain-containing protein 2 OS=Homo sapiens GN=CHIC2 PE=1 SV=1	0.733071	4.15e-05	0.00871676	candidate	FALSE
TRIM2	C9J084|Q9C040	Tripartite motif-containing protein 2 (Fragment) OS=Homo sapiens GN=TRIM2 PE=1 SV=1|Tripartite motif-containing protein 2 OS=Homo sapiens GN=TRIM2 PE=1 SV=1	0.71899	0.0133553	0.117437	enriched no hit	FALSE
TRIB3	B0QYQ2|J3KR25|Q96RU7	Tribbles homolog 3 (Fragment) OS=Homo sapiens GN=TRIB3 PE=1 SV=1|Tribbles homolog 3 OS=Homo sapiens GN=TRIB3 PE=1 SV=1|Tribbles homolog 3 OS=Homo sapiens GN=TRIB3 PE=1 SV=2	0.711805	0.00176063	0.0450608	enriched candidate	TRUE
FBN2	A0A087WYV8|P35556	Fibrillin-2 OS=Homo sapiens GN=FBN2 PE=1 SV=1|Fibrillin-2 OS=Homo sapiens GN=FBN2 PE=1 SV=3	0.705969	1.79e-05	0.00642149	enriched candidate	TRUE
SLC20A1	Q8WUM9	Sodium-dependent phosphate transporter 1 OS=Homo sapiens GN=SLC20A1 PE=1 SV=1	0.70307	2.24e-05	0.00642149	enriched candidate	TRUE
PIP5K1A	A6PW57|Q99755|Q99755-2|Q99755-3|Q99755-4	Isoform 2 of Phosphatidylinositol 4-phosphate 5-kinase type-1 alpha OS=Homo sapiens GN=PIP5K1A|Isoform 3 of Phosphatidylinositol 4-phosphate 5-kinase type-1 alpha OS=Homo sapiens GN=PIP5K1A|Isoform 4 of Phosphatidylinositol 4-phosphate 5-kinase type-1 alpha OS=Homo sapiens GN=PIP5K1A|Phosphatidylinositol 4-phosphate 5-kinase type-1 alpha OS=Homo sapiens GN=PIP5K1A PE=1 SV=1|Phosphatidylinositol 4…	0.69277	0.000118503	0.0164842	enriched candidate	TRUE
UBE2J1	Q9Y385	Ubiquitin-conjugating enzyme E2 J1 OS=Homo sapiens GN=UBE2J1 PE=1 SV=2	0.689551	0.0529563	0.237474	no hit	FALSE
UIMC1	Q96RL1|Q96RL1-2	BRCA1-A complex subunit RAP80 OS=Homo sapiens GN=UIMC1 PE=1 SV=2|Isoform 2 of BRCA1-A complex subunit RAP80 OS=Homo sapiens GN=UIMC1	0.685747	0.00222201	0.0492598	candidate	FALSE
RIMKLB	Q9ULI2|Q9ULI2-2	Beta-citrylglutamate synthase B OS=Homo sapiens GN=RIMKLB PE=2 SV=2|Isoform 2 of Beta-citrylglutamate synthase B OS=Homo sapiens GN=RIMKLB	0.685146	0.00120107	0.0401498	enriched candidate	TRUE
ATXN10	Q9UBB4|Q9UBB4-2	Ataxin-10 OS=Homo sapiens GN=ATXN10 PE=1 SV=1|Isoform 2 of Ataxin-10 OS=Homo sapiens GN=ATXN10	0.684353	0.00696781	0.0871628	enriched no hit	FALSE
OCLN	A0A0G2JMZ8|Q16625|Q16625-2|Q16625-3|Q16625-4	Isoform 2 of Occludin OS=Homo sapiens GN=OCLN|Isoform 3 of Occludin OS=Homo sapiens GN=OCLN|Isoform 4 of Occludin OS=Homo sapiens GN=OCLN|Occludin OS=Homo sapiens GN=OCLN PE=1 SV=1	0.6542	0.0193189	0.139162	no hit	FALSE
PGAM1	P18669	Phosphoglycerate mutase 1 OS=Homo sapiens GN=PGAM1 PE=1 SV=2	0.652951	0.0186633	0.136633	no hit	FALSE
UBE2E1	C9J2P0|P51965|P51965-3	Ubiquitin-conjugating enzyme E2 E1 (Fragment) OS=Homo sapiens GN=UBE2E1 PE=1 SV=1|Ubiquitin-conjugating enzyme E2 E1 OS=Homo sapiens GN=UBE2E1 PE=1 SV=1|Isoform 3 of Ubiquitin-conjugating enzyme E2 E1 OS=Homo sapiens GN=UBE2E1	0.651451	0.0465086	0.224899	no hit	FALSE
UBA6	A0AVT1	Ubiquitin-like modifier-activating enzyme 6 OS=Homo sapiens GN=UBA6 PE=1 SV=1	0.644263	0.033533	0.189518	no hit	FALSE
RFWD3	Q6PCD5	E3 ubiquitin-protein ligase RFWD3 OS=Homo sapiens GN=RFWD3 PE=1 SV=3	0.636334	0.000534216	0.0293395	candidate	FALSE
UBFD1	H3BRL3|H3BUM8|O14562	Ubiquitin domain-containing protein UBFD1 OS=Homo sapiens GN=UBFD1 PE=1 SV=1|Ubiquitin domain-containing protein UBFD1 OS=Homo sapiens GN=UBFD1 PE=1 SV=2	0.631386	0.0239054	0.156129	no hit	FALSE
HSPA1B|HSPA1A	A0A0G2JIW1|P0DMV8|P0DMV9	Heat shock 70 kDa protein 1B OS=Homo sapiens GN=HSPA1B PE=1 SV=1|Heat shock 70 kDa protein 1A OS=Homo sapiens GN=HSPA1A PE=1 SV=1|Heat shock 70 kDa protein 1B OS=Homo sapiens GN=HSPA1B PE=1 SV=1	0.627029	0.000998269	0.0380346	enriched candidate	TRUE
RLIM	Q9NVW2	E3 ubiquitin-protein ligase RLIM OS=Homo sapiens GN=RLIM PE=1 SV=3	0.624311	0.00320188	0.0608551	enriched no hit	FALSE
CKAP2	Q8WWK9|Q8WWK9-5|Q8WWK9-6	Cytoskeleton-associated protein 2 OS=Homo sapiens GN=CKAP2 PE=1 SV=1|Isoform 3 of Cytoskeleton-associated protein 2 OS=Homo sapiens GN=CKAP2|Isoform 4 of Cytoskeleton-associated protein 2 OS=Homo sapiens GN=CKAP2	0.623834	0.00635807	0.0839751	enriched no hit	FALSE
AMOT	Q4VCS5	Angiomotin OS=Homo sapiens GN=AMOT PE=1 SV=1	0.621306	0.00910641	0.100282	no hit	FALSE
USP9X	Q93008|Q93008-1	Probable ubiquitin carboxyl-terminal hydrolase FAF-X OS=Homo sapiens GN=USP9X PE=1 SV=3|Isoform 2 of Probable ubiquitin carboxyl-terminal hydrolase FAF-X OS=Homo sapiens GN=USP9X	0.619792	0.00332444	0.0613471	enriched no hit	FALSE
UCHL1	D6R956|D6R974|D6RE83|P09936	Ubiquitin carboxyl-terminal hydrolase OS=Homo sapiens GN=UCHL1 PE=1 SV=1|Ubiquitin carboxyl-terminal hydrolase OS=Homo sapiens GN=UCHL1 PE=1 SV=1|Ubiquitin carboxyl-terminal hydrolase OS=Homo sapiens GN=UCHL1 PE=1 SV=1|Ubiquitin carboxyl-terminal hydrolase isozyme L1 OS=Homo sapiens GN=UCHL1 PE=1 SV=2	0.618808	0.00630774	0.0839751	enriched no hit	FALSE
NOTCH2	Q04721	Neurogenic locus notch homolog protein 2 OS=Homo sapiens GN=NOTCH2 PE=1 SV=3	0.615743	0.0138774	0.11936	no hit	FALSE
ZBTB33	Q86T24	Transcriptional regulator Kaiso OS=Homo sapiens GN=ZBTB33 PE=1 SV=2	0.610431	0.000996265	0.0380346	candidate	FALSE
CYLD	H3BS09|H3BSW9|J3KRR7|Q9NQC7|Q9NQC7-2	Isoform 2 of Ubiquitin carboxyl-terminal hydrolase CYLD OS=Homo sapiens GN=CYLD|Ubiquitin carboxyl-terminal hydrolase CYLD (Fragment) OS=Homo sapiens GN=CYLD PE=1 SV=2|Ubiquitin carboxyl-terminal hydrolase CYLD OS=Homo sapiens GN=CYLD PE=1 SV=1	0.609202	0.000202641	0.0191449	enriched candidate	TRUE
RABGEF1	E9PFK9|Q9UJ41|Q9UJ41-2|Q9UJ41-3|Q9UJ41-4	Rab5 GDP/GTP exchange factor OS=Homo sapiens GN=RABGEF1 PE=1 SV=1|Rab5 GDP/GTP exchange factor OS=Homo sapiens GN=RABGEF1 PE=1 SV=2|Isoform 2 of Rab5 GDP/GTP exchange factor OS=Homo sapiens GN=RABGEF1|Isoform 3 of Rab5 GDP/GTP exchange factor OS=Homo sapiens GN=RABGEF1|Isoform 4 of Rab5 GDP/GTP exchange factor OS=Homo sapiens GN=RABGEF1	0.602224	0.02088	0.146719	no hit	FALSE
A0A0U1RQM0|KIAA0101	A0A0U1RQM0|H0YKX3|H0YMA4|Q15004	Uncharacterized protein OS=Homo sapiens PE=4 SV=1|PCNA-associated factor OS=Homo sapiens GN=KIAA0101 PE=1 SV=1|HCG2039386, isoform CRA_b OS=Homo sapiens GN=KIAA0101 PE=4 SV=1|PCNA-associated factor OS=Homo sapiens GN=KIAA0101 PE=1 SV=1	0.600007	0.0268145	0.165839	no hit	FALSE
CEP135	Q66GS9	Centrosomal protein of 135 kDa OS=Homo sapiens GN=CEP135 PE=1 SV=2	0.592712	0.00404442	0.0688207	no hit	FALSE
TUSC3	A0A0A0MTC2|D6RA37|D6RDV0|D6RIY7|Q13454|Q13454-2	Tumor suppressor candidate 3 (Fragment) OS=Homo sapiens GN=TUSC3 PE=1 SV=1|Tumor suppressor candidate 3 OS=Homo sapiens GN=TUSC3 PE=1 SV=1|Tumor suppressor candidate 3 OS=Homo sapiens GN=TUSC3 PE=1 SV=1|Tumor suppressor candidate 3 OS=Homo sapiens GN=TUSC3 PE=1 SV=1|Tumor suppressor candidate 3 OS=Homo sapiens GN=TUSC3 PE=1 SV=1|Isoform 2 of Tumor suppressor candidate 3 OS=Homo sapiens GN=TUSC3	0.592134	0.00516902	0.0782311	no hit	FALSE
N4BP1	O75113	NEDD4-binding protein 1 OS=Homo sapiens GN=N4BP1 PE=1 SV=4	0.58252	0.00012977	0.0164842	candidate	FALSE
RAD18	Q9NS91	E3 ubiquitin-protein ligase RAD18 OS=Homo sapiens GN=RAD18 PE=1 SV=2	0.581738	0.0200564	0.142845	no hit	FALSE
SQSTM1	E7EMC7|E9PFW8|Q13501|Q13501-2	Isoform 2 of Sequestosome-1 OS=Homo sapiens GN=SQSTM1|Sequestosome-1 (Fragment) OS=Homo sapiens GN=SQSTM1 PE=1 SV=1|Sequestosome-1 OS=Homo sapiens GN=SQSTM1 PE=1 SV=1	0.581357	0.00402751	0.0688207	enriched no hit	FALSE
ZNF451	E9PH99|Q9Y4E5|Q9Y4E5-2|Q9Y4E5-4	E3 SUMO-protein ligase ZNF451 OS=Homo sapiens GN=ZNF451 PE=1 SV=1|E3 SUMO-protein ligase ZNF451 OS=Homo sapiens GN=ZNF451 PE=1 SV=2|Isoform 2 of E3 SUMO-protein ligase ZNF451 OS=Homo sapiens GN=ZNF451|Isoform 3 of E3 SUMO-protein ligase ZNF451 OS=Homo sapiens GN=ZNF451	0.580295	0.00241104	0.0527079	no hit	FALSE
RNF25	Q96BH1	E3 ubiquitin-protein ligase RNF25 OS=Homo sapiens GN=RNF25 PE=1 SV=1	0.577929	0.0217418	0.149114	enriched no hit	FALSE
MAP4	E7EVA0|P27816|P27816-6	Isoform 6 of Microtubule-associated protein 4 OS=Homo sapiens GN=MAP4|Microtubule-associated protein 4 OS=Homo sapiens GN=MAP4 PE=1 SV=3|Microtubule-associated protein OS=Homo sapiens GN=MAP4 PE=1 SV=1	0.574638	0.011319	0.11002	no hit	FALSE
CCDC50	Q8IVM0|Q8IVM0-2	Coiled-coil domain-containing protein 50 OS=Homo sapiens GN=CCDC50 PE=1 SV=1|Isoform 2 of Coiled-coil domain-containing protein 50 OS=Homo sapiens GN=CCDC50	0.567913	0.0166813	0.130691	no hit	FALSE
HMGCR	P04035|P04035-2|P04035-3	3-hydroxy-3-methylglutaryl-coenzyme A reductase OS=Homo sapiens GN=HMGCR PE=1 SV=1|Isoform 2 of 3-hydroxy-3-methylglutaryl-coenzyme A reductase OS=Homo sapiens GN=HMGCR|Isoform 3 of 3-hydroxy-3-methylglutaryl-coenzyme A reductase OS=Homo sapiens GN=HMGCR	0.567322	3.7e-05	0.00831173	enriched candidate	TRUE
USP11	G5E9A6|P51784	Ubiquitin carboxyl-terminal hydrolase 11 OS=Homo sapiens GN=USP11 PE=1 SV=1|Ubiquitin carboxyl-terminal hydrolase 11 OS=Homo sapiens GN=USP11 PE=1 SV=3	0.565043	0.0020832	0.047994	enriched candidate	TRUE
NDC80	O14777	Kinetochore protein NDC80 homolog OS=Homo sapiens GN=NDC80 PE=1 SV=1	0.562637	0.000137189	0.0166104	candidate	FALSE
MACF1	E9PLY5|H3BPE1|H3BQK9|Q9UPN3|Q9UPN3-2|Q9UPN3-3|Q9UPN3-4|Q9UPN3-5	Isoform 2 of Microtubule-actin cross-linking factor 1, isoforms 1/2/3/5 OS=Homo sapiens GN=MACF1|Isoform 3 of Microtubule-actin cross-linking factor 1, isoforms 1/2/3/5 OS=Homo sapiens GN=MACF1|Isoform 4 of Microtubule-actin cross-linking factor 1, isoforms 1/2/3/5 OS=Homo sapiens GN=MACF1|Isoform 5 of Microtubule-actin cross-linking factor 1, isoforms 1/2/3/5 OS=Homo sapiens GN=MACF1|Microtubule…	0.56139	0.0173934	0.133874	no hit	FALSE
KMT5A	A0A0C4DFR3|Q9NQR1|Q9NQR1-2	N-lysine methyltransferase KMT5A OS=Homo sapiens GN=KMT5A PE=1 SV=1|N-lysine methyltransferase KMT5A OS=Homo sapiens GN=KMT5A PE=1 SV=3|Isoform 2 of N-lysine methyltransferase KMT5A OS=Homo sapiens GN=KMT5A	0.558979	0.00295776	0.0578326	no hit	FALSE
HLA-C	A0A140T921|A0A140T962|A0A140T9B3|A0A140T9H5|A0A140T9J9|A0A140T9U8|A2AEA2|O19617|P10321|P30499|P30508|Q29963	HLA class I antigen OS=Homo sapiens GN=HLA-C PE=1 SV=1|HLA class I histocompatibility antigen, Cw-1 alpha chain OS=Homo sapiens GN=HLA-C PE=1 SV=1|HLA class I histocompatibility antigen, Cw-12 alpha chain OS=Homo sapiens GN=HLA-C PE=1 SV=2|HLA class I histocompatibility antigen, Cw-6 alpha chain OS=Homo sapiens GN=HLA-C PE=1 SV=1|HLA class I histocompatibility antigen, Cw-6 alpha chain OS=Homo sa…	0.557909	0.146597	0.410211	no hit	FALSE
MAP3K1	Q13233	Mitogen-activated protein kinase kinase kinase 1 OS=Homo sapiens GN=MAP3K1 PE=1 SV=4	0.548948	0.00645112	0.0842661	enriched no hit	FALSE
CSPP1	Q1MSJ5|Q1MSJ5-1	Centrosome and spindle pole-associated protein 1 OS=Homo sapiens GN=CSPP1 PE=1 SV=4|Isoform 1 of Centrosome and spindle pole-associated protein 1 OS=Homo sapiens GN=CSPP1	0.54747	0.000348198	0.0253006	candidate	FALSE
TANK	E7EQA9|Q92844	TRAF family member-associated NF-kappa-B activator OS=Homo sapiens GN=TANK PE=1 SV=1|TRAF family member-associated NF-kappa-B activator OS=Homo sapiens GN=TANK PE=1 SV=2	0.545825	0.0788408	0.291361	no hit	FALSE
TAF9|TAF9B	D6RGK3|D6RHW1|D6RIE8|D6RIV9|D6RIY1|Q16594|Q9HBM6	Adenylate kinase isoenzyme 6 (Fragment) OS=Homo sapiens GN=TAF9 PE=1 SV=7|Adenylate kinase isoenzyme 6 (Fragment) OS=Homo sapiens GN=TAF9 PE=1 SV=3|Adenylate kinase isoenzyme 6 (Fragment) OS=Homo sapiens GN=TAF9 PE=1 SV=8|Adenylate kinase isoenzyme 6 (Fragment) OS=Homo sapiens GN=TAF9 PE=1 SV=3|Adenylate kinase isoenzyme 6 (Fragment) OS=Homo sapiens GN=TAF9 PE=1 SV=3|Transcription initiation fact…	0.541923	0.00484962	0.0752049	no hit	FALSE
USP47	Q96K76|Q96K76-2|Q96K76-4	Isoform 2 of Ubiquitin carboxyl-terminal hydrolase 47 OS=Homo sapiens GN=USP47|Isoform 4 of Ubiquitin carboxyl-terminal hydrolase 47 OS=Homo sapiens GN=USP47|Ubiquitin carboxyl-terminal hydrolase 47 OS=Homo sapiens GN=USP47 PE=1 SV=3	0.536099	0.000553968	0.0293395	candidate	FALSE
CERK	Q8TCT0	Ceramide kinase OS=Homo sapiens GN=CERK PE=1 SV=1	0.53511	0.00527362	0.0794323	no hit	FALSE
GMNN	E2QRF9|H7C608|O75496	Geminin (Fragment) OS=Homo sapiens GN=GMNN PE=1 SV=1|Geminin (Fragment) OS=Homo sapiens GN=GMNN PE=1 SV=1|Geminin OS=Homo sapiens GN=GMNN PE=1 SV=1	0.534016	0.0325784	0.185791	no hit	FALSE
CEP85	H7BZW2|Q6P2H3|Q6P2H3-2|Q6P2H3-4	Centrosomal protein of 85 kDa (Fragment) OS=Homo sapiens GN=CEP85 PE=1 SV=1|Centrosomal protein of 85 kDa OS=Homo sapiens GN=CEP85 PE=1 SV=1|Isoform 2 of Centrosomal protein of 85 kDa OS=Homo sapiens GN=CEP85|Isoform 4 of Centrosomal protein of 85 kDa OS=Homo sapiens GN=CEP85	0.533825	0.00123331	0.0404421	enriched candidate	TRUE
UBE2T	Q9NPD8	Ubiquitin-conjugating enzyme E2 T OS=Homo sapiens GN=UBE2T PE=1 SV=1	0.533042	0.0382534	0.202121	no hit	FALSE
MPHOSPH9	A0A0A0MTP3|J3KNE4|Q99550|Q99550-2	Isoform 2 of M-phase phosphoprotein 9 OS=Homo sapiens GN=MPHOSPH9|M-phase phosphoprotein 9 (Fragment) OS=Homo sapiens GN=MPHOSPH9 PE=1 SV=2|M-phase phosphoprotein 9 OS=Homo sapiens GN=MPHOSPH9 PE=1 SV=1|M-phase phosphoprotein 9 OS=Homo sapiens GN=MPHOSPH9 PE=1 SV=4	0.532974	0.0061031	0.0831713	no hit	FALSE
EPS15L1	M0R165|Q9UBC2|Q9UBC2-2|Q9UBC2-3	Epidermal growth factor receptor substrate 15-like 1 OS=Homo sapiens GN=EPS15L1 PE=1 SV=1|Isoform 2 of Epidermal growth factor receptor substrate 15-like 1 OS=Homo sapiens GN=EPS15L1|Isoform 3 of Epidermal growth factor receptor substrate 15-like 1 OS=Homo sapiens GN=EPS15L1	0.52718	0.0318347	0.183545	no hit	FALSE
SPG20	Q8N0X7	Spartin OS=Homo sapiens GN=SPG20 PE=1 SV=1	0.525982	0.0112964	0.11002	enriched no hit	FALSE
TOPORS	Q9NS56|Q9NS56-2	E3 ubiquitin-protein ligase Topors OS=Homo sapiens GN=TOPORS PE=1 SV=1|Isoform 2 of E3 ubiquitin-protein ligase Topors OS=Homo sapiens GN=TOPORS	0.525558	0.000604916	0.0293395	candidate	FALSE
PRNP	A2A2V1|P04156|P04156-2|X6RKS3	Isoform 2 of Major prion protein OS=Homo sapiens GN=PRNP|Major prion protein (Fragment) OS=Homo sapiens GN=PRNP PE=1 SV=1|Major prion protein OS=Homo sapiens GN=PRNP PE=1 SV=1	0.525446	0.00443934	0.0721295	no hit	FALSE
DCAF12	Q5T6F0|X6RBJ8|X6RL26	DDB1- and CUL4-associated factor 12 (Fragment) OS=Homo sapiens GN=DCAF12 PE=1 SV=1|DDB1- and CUL4-associated factor 12 OS=Homo sapiens GN=DCAF12 PE=1 SV=1	0.522326	0.000384515	0.0254793	candidate	FALSE
PSMA6	G3V295|G3V5Z7|P60900|P60900-3	Isoform 3 of Proteasome subunit alpha type-6 OS=Homo sapiens GN=PSMA6|Proteasome subunit alpha type-6 OS=Homo sapiens GN=PSMA6 PE=1 SV=1|Proteasome subunit alpha type OS=Homo sapiens GN=PSMA6 PE=1 SV=1	0.517196	0.102899	0.337667	no hit	FALSE
USP13	Q92995|Q92995-2	Isoform 2 of Ubiquitin carboxyl-terminal hydrolase 13 OS=Homo sapiens GN=USP13|Ubiquitin carboxyl-terminal hydrolase 13 OS=Homo sapiens GN=USP13 PE=1 SV=2	0.514651	0.00415165	0.0695181	enriched no hit	FALSE
BLZF1	Q5T532|Q9H2G9	Golgin-45 (Fragment) OS=Homo sapiens GN=BLZF1 PE=1 SV=1|Golgin-45 OS=Homo sapiens GN=BLZF1 PE=1 SV=2	0.508404	0.00298143	0.0579355	no hit	FALSE
UBAC1	Q9BSL1	Ubiquitin-associated domain-containing protein 1 OS=Homo sapiens GN=UBAC1 PE=1 SV=1	0.504334	0.01034	0.107073	enriched no hit	FALSE
SETDB1	E9PRF4|Q15047|Q15047-3	Histone-lysine N-methyltransferase SETDB1 (Fragment) OS=Homo sapiens GN=SETDB1 PE=1 SV=1|Histone-lysine N-methyltransferase SETDB1 OS=Homo sapiens GN=SETDB1 PE=1 SV=1|Isoform 3 of Histone-lysine N-methyltransferase SETDB1 OS=Homo sapiens GN=SETDB1	0.503746	0.0106983	0.109345	no hit	FALSE
TGFBR1	B4DY26|P36897|P36897-2	Isoform 2 of TGF-beta receptor type-1 OS=Homo sapiens GN=TGFBR1|Receptor protein serine/threonine kinase OS=Homo sapiens GN=TGFBR1 PE=1 SV=1|TGF-beta receptor type-1 OS=Homo sapiens GN=TGFBR1 PE=1 SV=1	0.500142	0.000423125	0.0256153	candidate	FALSE
ZNHIT6	Q9NWK9|Q9NWK9-2	Box C/D snoRNA protein 1 OS=Homo sapiens GN=ZNHIT6 PE=1 SV=1|Isoform 2 of Box C/D snoRNA protein 1 OS=Homo sapiens GN=ZNHIT6	0.498934	0.00197364	0.0467143	candidate	FALSE
USO1	O60763|O60763-2	General vesicular transport factor p115 OS=Homo sapiens GN=USO1 PE=1 SV=2|Isoform 2 of General vesicular transport factor p115 OS=Homo sapiens GN=USO1	0.497877	0.0027648	0.0561114	no hit	FALSE
EPS15	B1AUU8|P42566	Epidermal growth factor receptor substrate 15 OS=Homo sapiens GN=EPS15 PE=1 SV=1|Epidermal growth factor receptor substrate 15 OS=Homo sapiens GN=EPS15 PE=1 SV=2	0.49711	0.0939226	0.322079	no hit	FALSE
CACYBP	Q9HB71	Calcyclin-binding protein OS=Homo sapiens GN=CACYBP PE=1 SV=2	0.496616	0.0112418	0.11002	enriched no hit	FALSE
HLA-A	A0A0G2JNY4|A0A140T913|A0A140T933|A0A140T955|A0A140T9I0|A0A140T9X5|P01892|P10316|P30457	HLA class I histocompatibility antigen, A-2 alpha chain OS=Homo sapiens GN=HLA-A PE=1 SV=1|HLA class I histocompatibility antigen, A-3 alpha chain (Fragment) OS=Homo sapiens GN=HLA-A PE=1 SV=1|HLA class I histocompatibility antigen, A-3 alpha chain OS=Homo sapiens GN=HLA-A PE=1 SV=1|HLA class I histocompatibility antigen, A-66 alpha chain OS=Homo sapiens GN=HLA-A PE=1 SV=1|HLA class I histocompat…	0.495722	0.0115252	0.110325	enriched no hit	FALSE
USP34	A0A0C4DG73|Q70CQ2|Q70CQ2-2|Q70CQ2-3	Isoform 2 of Ubiquitin carboxyl-terminal hydrolase 34 OS=Homo sapiens GN=USP34|Isoform 3 of Ubiquitin carboxyl-terminal hydrolase 34 OS=Homo sapiens GN=USP34|Ubiquitin carboxyl-terminal hydrolase 34 (Fragment) OS=Homo sapiens GN=USP34 PE=1 SV=1|Ubiquitin carboxyl-terminal hydrolase 34 OS=Homo sapiens GN=USP34 PE=1 SV=2	0.490836	0.00974594	0.103649	enriched no hit	FALSE
RDX	P35241|P35241-5	Radixin OS=Homo sapiens GN=RDX PE=1 SV=1|Isoform 5 of Radixin OS=Homo sapiens GN=RDX	0.4901	0.00751354	0.0893911	no hit	FALSE
BAT3|BAG6	A0A024RCR6|A0A0G2JK23|P46379|P46379-2|P46379-3	HLA-B associated transcript 3, isoform CRA_a OS=Homo sapiens GN=BAT3 PE=1 SV=1|Large proline-rich protein BAG6 OS=Homo sapiens GN=BAG6 PE=1 SV=1|Large proline-rich protein BAG6 OS=Homo sapiens GN=BAG6 PE=1 SV=2|Isoform 2 of Large proline-rich protein BAG6 OS=Homo sapiens GN=BAG6|Isoform 3 of Large proline-rich protein BAG6 OS=Homo sapiens GN=BAG6	0.489691	0.0550595	0.242077	no hit	FALSE
NET1	Q7Z628|Q7Z628-2	Isoform 2 of Neuroepithelial cell-transforming gene 1 protein OS=Homo sapiens GN=NET1|Neuroepithelial cell-transforming gene 1 protein OS=Homo sapiens GN=NET1 PE=1 SV=1	0.482067	0.0114084	0.110325	no hit	FALSE
SPRTN	Q9H040	SprT-like domain-containing protein Spartan OS=Homo sapiens GN=SPRTN PE=1 SV=2	0.480842	0.0102108	0.106563	enriched no hit	FALSE
ITCH	Q96J02|Q96J02-2|Q96J02-3	E3 ubiquitin-protein ligase Itchy homolog OS=Homo sapiens GN=ITCH PE=1 SV=2|Isoform 2 of E3 ubiquitin-protein ligase Itchy homolog OS=Homo sapiens GN=ITCH|Isoform 3 of E3 ubiquitin-protein ligase Itchy homolog OS=Homo sapiens GN=ITCH	0.480763	0.00166205	0.0439676	no hit	FALSE
RNF168	Q8IYW5	E3 ubiquitin-protein ligase RNF168 OS=Homo sapiens GN=RNF168 PE=1 SV=1	0.479075	0.00530175	0.0794757	enriched no hit	FALSE
CENPF	P49454	Centromere protein F OS=Homo sapiens GN=CENPF PE=1 SV=2	0.478529	0.0141219	0.12015	no hit	FALSE
TNKS2	Q9H2K2	Tankyrase-2 OS=Homo sapiens GN=TNKS2 PE=1 SV=1	0.477327	0.0851906	0.30495	enriched no hit	FALSE
FAT1	A0A087WVP1|Q14517	Protocadherin Fat 1 OS=Homo sapiens GN=FAT1 PE=1 SV=1|Protocadherin Fat 1 OS=Homo sapiens GN=FAT1 PE=1 SV=2	0.476446	0.000231234	0.0191449	enriched no hit	FALSE
TAX1BP1	B8ZZD4|Q86VP1|Q86VP1-2|Q86VP1-3|Q86VP1-4|V9GZ06	Isoform 2 of Tax1-binding protein 1 OS=Homo sapiens GN=TAX1BP1|Isoform 3 of Tax1-binding protein 1 OS=Homo sapiens GN=TAX1BP1|Isoform 4 of Tax1-binding protein 1 OS=Homo sapiens GN=TAX1BP1|Tax1-binding protein 1 (Fragment) OS=Homo sapiens GN=TAX1BP1 PE=1 SV=1|Tax1-binding protein 1 OS=Homo sapiens GN=TAX1BP1 PE=1 SV=1|Tax1-binding protein 1 OS=Homo sapiens GN=TAX1BP1 PE=1 SV=2	0.476109	0.0211325	0.147506	no hit	FALSE
RAD23B	P54727	UV excision repair protein RAD23 homolog B OS=Homo sapiens GN=RAD23B PE=1 SV=1	0.467838	0.174048	0.445449	no hit	FALSE
PIAS3	E9PHH8|Q9Y6X2	E3 SUMO-protein ligase PIAS3 OS=Homo sapiens GN=PIAS3 PE=1 SV=1|E3 SUMO-protein ligase PIAS3 OS=Homo sapiens GN=PIAS3 PE=1 SV=2	0.4668	0.00590009	0.0827248	no hit	FALSE
PIAS4	Q8N2W9	E3 SUMO-protein ligase PIAS4 OS=Homo sapiens GN=PIAS4 PE=1 SV=1	0.46648	0.0148177	0.123077	no hit	FALSE
ST13	P50502	Hsc70-interacting protein OS=Homo sapiens GN=ST13 PE=1 SV=2	0.4661	0.0789033	0.291361	no hit	FALSE
COPS3	H7C3P9|Q9UNS2|Q9UNS2-2	COP9 signalosome complex subunit 3 OS=Homo sapiens GN=COPS3 PE=1 SV=2|COP9 signalosome complex subunit 3 OS=Homo sapiens GN=COPS3 PE=1 SV=3|Isoform 2 of COP9 signalosome complex subunit 3 OS=Homo sapiens GN=COPS3	0.466025	0.0261285	0.162878	no hit	FALSE
PSMA7	O14818|O14818-2	Isoform 2 of Proteasome subunit alpha type-7 OS=Homo sapiens GN=PSMA7|Proteasome subunit alpha type-7 OS=Homo sapiens GN=PSMA7 PE=1 SV=1	0.465211	0.0838735	0.302189	no hit	FALSE
PSMA3	G3V4X5|P25788|P25788-2	Isoform 2 of Proteasome subunit alpha type-3 OS=Homo sapiens GN=PSMA3|Proteasome subunit alpha type-3 OS=Homo sapiens GN=PSMA3 PE=1 SV=1|Proteasome subunit alpha type-3 OS=Homo sapiens GN=PSMA3 PE=1 SV=2	0.463765	0.119471	0.367281	no hit	FALSE
IFNGR1	P15260	Interferon gamma receptor 1 OS=Homo sapiens GN=IFNGR1 PE=1 SV=1	0.458474	0.000388502	0.0254793	no hit	FALSE
SPAG5	Q96R06	Sperm-associated antigen 5 OS=Homo sapiens GN=SPAG5 PE=1 SV=2	0.458041	0.00679213	0.0855265	no hit	FALSE
PTRF	Q6NZI2	Polymerase I and transcript release factor OS=Homo sapiens GN=PTRF PE=1 SV=1	0.455381	0.00307592	0.0594049	enriched no hit	FALSE
ATF6	P18850	Cyclic AMP-dependent transcription factor ATF-6 alpha OS=Homo sapiens GN=ATF6 PE=1 SV=3	0.455344	0.00181229	0.0452784	enriched no hit	FALSE
ADCY3	A0A0A0MSC1|C9JLX3|H7C1A6|O60266|O60266-2|U3KQ91	Adenylate cyclase type 3 (Fragment) OS=Homo sapiens GN=ADCY3 PE=1 SV=1|Adenylate cyclase type 3 OS=Homo sapiens GN=ADCY3 PE=1 SV=1|Adenylate cyclase type 3 OS=Homo sapiens GN=ADCY3 PE=1 SV=3|Isoform 2 of Adenylate cyclase type 3 OS=Homo sapiens GN=ADCY3	0.454919	0.00258588	0.0546333	no hit	FALSE
CTNNB1	B4DGU4|P35222	Catenin beta-1 OS=Homo sapiens GN=CTNNB1 PE=1 SV=1	0.451631	0.0117871	0.110941	enriched no hit	FALSE
CFAP36	Q96G28|Q96G28-2	Cilia- and flagella-associated protein 36 OS=Homo sapiens GN=CFAP36 PE=1 SV=2|Isoform 2 of Cilia- and flagella-associated protein 36 OS=Homo sapiens GN=CFAP36	0.451431	0.0510291	0.234706	no hit	FALSE
ARIH1	Q9Y4X5	E3 ubiquitin-protein ligase ARIH1 OS=Homo sapiens GN=ARIH1 PE=1 SV=2	0.449153	0.061275	0.25401	no hit	FALSE
UBXN1	E9PJ81|E9PRQ7|Q04323|Q04323-2	Isoform 2 of UBX domain-containing protein 1 OS=Homo sapiens GN=UBXN1|UBX domain-containing protein 1 (Fragment) OS=Homo sapiens GN=UBXN1 PE=1 SV=1|UBX domain-containing protein 1 OS=Homo sapiens GN=UBXN1 PE=1 SV=1|UBX domain-containing protein 1 OS=Homo sapiens GN=UBXN1 PE=1 SV=2	0.446692	0.00400477	0.0688207	enriched no hit	FALSE
POLK	Q9UBT6|Q9UBT6-8	DNA polymerase kappa OS=Homo sapiens GN=POLK PE=1 SV=1|Isoform 8 of DNA polymerase kappa OS=Homo sapiens GN=POLK	0.445909	0.00121164	0.0401498	no hit	FALSE
CTNNA1	G3XAM7|P35221|P35221-2	Catenin (Cadherin-associated protein), alpha 1, 102kDa, isoform CRA_a OS=Homo sapiens GN=CTNNA1 PE=1 SV=1|Catenin alpha-1 OS=Homo sapiens GN=CTNNA1 PE=1 SV=1|Isoform 2 of Catenin alpha-1 OS=Homo sapiens GN=CTNNA1	0.444894	0.0377394	0.201362	no hit	FALSE
PCM1	E7ETA6|Q15154	Pericentriolar material 1 protein OS=Homo sapiens GN=PCM1 PE=1 SV=1|Pericentriolar material 1 protein OS=Homo sapiens GN=PCM1 PE=1 SV=4	0.442911	0.024379	0.157912	no hit	FALSE
CCDC138	Q96M89|Q96M89-2	Coiled-coil domain-containing protein 138 OS=Homo sapiens GN=CCDC138 PE=1 SV=1|Isoform 2 of Coiled-coil domain-containing protein 138 OS=Homo sapiens GN=CCDC138	0.441176	0.000613399	0.0293395	enriched no hit	FALSE
ATXN3	A0A087X1A8|C9JQV6|D3VVH9|F5H211|G3V328|G3V3R7|P54252|P54252-2|P54252-3|P54252-4	Ataxin-3 OS=Homo sapiens GN=ATXN3 PE=1 SV=1|Ataxin-3 OS=Homo sapiens GN=ATXN3 PE=1 SV=3|Ataxin 3 variant m OS=Homo sapiens GN=ATXN3 PE=1 SV=1|Ataxin-3 OS=Homo sapiens GN=ATXN3 PE=1 SV=2|Ataxin-3 (Fragment) OS=Homo sapiens GN=ATXN3 PE=1 SV=1|Ataxin-3 (Fragment) OS=Homo sapiens GN=ATXN3 PE=1 SV=1|Ataxin-3 OS=Homo sapiens GN=ATXN3 PE=1 SV=4|Isoform 2 of Ataxin-3 OS=Homo sapiens GN=ATXN3|Isoform 3 of…	0.440921	0.10335	0.338549	no hit	FALSE
USP1	O94782	Ubiquitin carboxyl-terminal hydrolase 1 OS=Homo sapiens GN=USP1 PE=1 SV=1	0.43988	0.0025578	0.0545663	no hit	FALSE
HIF1A	A8MYV6|F8W9L0|Q16665|Q16665-2|Q16665-3	Hypoxia-inducible factor 1-alpha OS=Homo sapiens GN=HIF1A PE=1 SV=1|Hypoxia-inducible factor 1, alpha subunit (Basic helix-loop-helix transcription factor), isoform CRA_a OS=Homo sapiens GN=HIF1A PE=1 SV=1|Isoform 2 of Hypoxia-inducible factor 1-alpha OS=Homo sapiens GN=HIF1A|Isoform 3 of Hypoxia-inducible factor 1-alpha OS=Homo sapiens GN=HIF1A	0.438058	0.0214905	0.148586	enriched no hit	FALSE
USP25	Q9UHP3|Q9UHP3-1|Q9UHP3-3	Isoform USP25b of Ubiquitin carboxyl-terminal hydrolase 25 OS=Homo sapiens GN=USP25|Isoform USP25m of Ubiquitin carboxyl-terminal hydrolase 25 OS=Homo sapiens GN=USP25|Ubiquitin carboxyl-terminal hydrolase 25 OS=Homo sapiens GN=USP25 PE=1 SV=4	0.43795	0.0157097	0.128548	no hit	FALSE
TSG101	F5H442|Q99816	Tumor susceptibility gene 101 protein OS=Homo sapiens GN=TSG101 PE=1 SV=1|Tumor susceptibility gene 101 protein OS=Homo sapiens GN=TSG101 PE=1 SV=2	0.43747	0.0032957	0.0613471	no hit	FALSE
CNNM3	Q8NE01	Metal transporter CNNM3 OS=Homo sapiens GN=CNNM3 PE=1 SV=1	0.436912	0.0104123	0.107468	no hit	FALSE
USP24	Q9UPU5	Ubiquitin carboxyl-terminal hydrolase 24 OS=Homo sapiens GN=USP24 PE=1 SV=3	0.434216	0.00806662	0.0927669	no hit	FALSE
HTRA2	A0A0C4DG44|O43464|O43464-2|O43464-3	Isoform 2 of Serine protease HTRA2, mitochondrial OS=Homo sapiens GN=HTRA2|Isoform 3 of Serine protease HTRA2, mitochondrial OS=Homo sapiens GN=HTRA2|Serine protease HTRA2, mitochondrial (Fragment) OS=Homo sapiens GN=HTRA2 PE=1 SV=1|Serine protease HTRA2, mitochondrial OS=Homo sapiens GN=HTRA2 PE=1 SV=2	0.434122	0.00739293	0.088828	enriched no hit	FALSE
PDCD6IP	Q8WUM4	Programmed cell death 6-interacting protein OS=Homo sapiens GN=PDCD6IP PE=1 SV=1	0.433544	0.00395859	0.0688207	no hit	FALSE
KIF1A	F8W8V9|Q12756|Q12756-2|Q12756-3	Isoform 2 of Kinesin-like protein KIF1A OS=Homo sapiens GN=KIF1A|Isoform 3 of Kinesin-like protein KIF1A OS=Homo sapiens GN=KIF1A|Kinesin-like protein KIF1A (Fragment) OS=Homo sapiens GN=KIF1A PE=1 SV=1|Kinesin-like protein KIF1A OS=Homo sapiens GN=KIF1A PE=1 SV=2	0.4328	0.00187628	0.0455275	no hit	FALSE
NF2	P35240|P35240-2|P35240-3|P35240-6|P35240-8	Isoform 2 of Merlin OS=Homo sapiens GN=NF2|Isoform 3 of Merlin OS=Homo sapiens GN=NF2|Isoform 6 of Merlin OS=Homo sapiens GN=NF2|Isoform 8 of Merlin OS=Homo sapiens GN=NF2|Merlin OS=Homo sapiens GN=NF2 PE=1 SV=1	0.432646	0.00100282	0.0380346	no hit	FALSE
TCAF1	Q9Y4C2|Q9Y4C2-2	TRPM8 channel-associated factor 1 OS=Homo sapiens GN=TCAF1 PE=1 SV=3|Isoform 2 of TRPM8 channel-associated factor 1 OS=Homo sapiens GN=TCAF1	0.431237	0.0129046	0.114493	enriched no hit	FALSE
USP14	A6NJA2|P54578|P54578-2|P54578-3	Isoform 2 of Ubiquitin carboxyl-terminal hydrolase 14 OS=Homo sapiens GN=USP14|Isoform 3 of Ubiquitin carboxyl-terminal hydrolase 14 OS=Homo sapiens GN=USP14|Ubiquitin carboxyl-terminal hydrolase 14 OS=Homo sapiens GN=USP14 PE=1 SV=2|Ubiquitin carboxyl-terminal hydrolase 14 OS=Homo sapiens GN=USP14 PE=1 SV=3	0.43119	0.0341687	0.190239	no hit	FALSE
TMEM206	Q9H813|Q9H813-2	Transmembrane protein 206 OS=Homo sapiens GN=TMEM206 PE=1 SV=1|Isoform 2 of Transmembrane protein 206 OS=Homo sapiens GN=TMEM206	0.429732	0.0138052	0.11936	enriched no hit	FALSE
UBQLN2	Q9UHD9	Ubiquilin-2 OS=Homo sapiens GN=UBQLN2 PE=1 SV=2	0.427673	0.128188	0.378999	no hit	FALSE
FBXW11	Q9UKB1|Q9UKB1-2|Q9UKB1-3	F-box/WD repeat-containing protein 11 OS=Homo sapiens GN=FBXW11 PE=1 SV=1|Isoform A of F-box/WD repeat-containing protein 11 OS=Homo sapiens GN=FBXW11|Isoform B of F-box/WD repeat-containing protein 11 OS=Homo sapiens GN=FBXW11	0.426899	0.00571727	0.0818089	no hit	FALSE
RNF169	Q8NCN4	E3 ubiquitin-protein ligase RNF169 OS=Homo sapiens GN=RNF169 PE=1 SV=2	0.423593	0.00672592	0.0852806	no hit	FALSE
PSMA2	A0A024RA52|P25787	Proteasome subunit alpha type OS=Homo sapiens GN=PSMA2 PE=1 SV=1|Proteasome subunit alpha type-2 OS=Homo sapiens GN=PSMA2 PE=1 SV=2	0.423219	0.122238	0.37085	no hit	FALSE
ANTXR1	Q9H6X2|Q9H6X2-5	Anthrax toxin receptor 1 OS=Homo sapiens GN=ANTXR1 PE=1 SV=2|Isoform 5 of Anthrax toxin receptor 1 OS=Homo sapiens GN=ANTXR1	0.419464	0.0142289	0.120213	no hit	FALSE
CDC45	O75419|O75419-2|O75419-3	Cell division control protein 45 homolog OS=Homo sapiens GN=CDC45 PE=1 SV=1|Isoform 2 of Cell division control protein 45 homolog OS=Homo sapiens GN=CDC45|Isoform 3 of Cell division control protein 45 homolog OS=Homo sapiens GN=CDC45	0.415484	0.0018801	0.0455275	no hit	FALSE
PSMD1	A0A087WW66|Q99460|Q99460-2	26S proteasome non-ATPase regulatory subunit 1 OS=Homo sapiens GN=PSMD1 PE=1 SV=1|26S proteasome non-ATPase regulatory subunit 1 OS=Homo sapiens GN=PSMD1 PE=1 SV=2|Isoform 2 of 26S proteasome non-ATPase regulatory subunit 1 OS=Homo sapiens GN=PSMD1	0.415441	0.0681079	0.27037	no hit	FALSE
PSMA4	P25789	Proteasome subunit alpha type-4 OS=Homo sapiens GN=PSMA4 PE=1 SV=1	0.414093	0.117016	0.362515	no hit	FALSE
NSL1	Q5SY74|Q96IY1|Q96IY1-2	Kinetochore-associated protein NSL1 homolog OS=Homo sapiens GN=NSL1 PE=1 SV=1|Kinetochore-associated protein NSL1 homolog OS=Homo sapiens GN=NSL1 PE=1 SV=3|Isoform 2 of Kinetochore-associated protein NSL1 homolog OS=Homo sapiens GN=NSL1	0.412316	0.136053	0.394373	no hit	FALSE
PSMD4	P55036|Q5VWC4	26S proteasome non-ATPase regulatory subunit 4 OS=Homo sapiens GN=PSMD4 PE=1 SV=1|26S proteasome non-ATPase regulatory subunit 4 OS=Homo sapiens GN=PSMD4 PE=1 SV=1	0.410208	0.0587412	0.250026	no hit	FALSE
UBE3A	A0A0D9SG77|Q05086|Q05086-2|Q05086-3	Isoform I of Ubiquitin-protein ligase E3A OS=Homo sapiens GN=UBE3A|Isoform III of Ubiquitin-protein ligase E3A OS=Homo sapiens GN=UBE3A|Ubiquitin-protein ligase E3A OS=Homo sapiens GN=UBE3A PE=1 SV=1|Ubiquitin-protein ligase E3A OS=Homo sapiens GN=UBE3A PE=1 SV=4	0.408082	0.0531074	0.237474	no hit	FALSE
VBP1	B4DWR3|P61758	Prefoldin subunit 3 OS=Homo sapiens GN=VBP1 PE=1 SV=1|Prefoldin subunit 3 OS=Homo sapiens GN=VBP1 PE=1 SV=3	0.407728	0.103648	0.339173	no hit	FALSE
H7C1W4|TATDN2	H7C1W4|Q93075	Uncharacterized protein (Fragment) OS=Homo sapiens PE=4 SV=1|Putative deoxyribonuclease TATDN2 OS=Homo sapiens GN=TATDN2 PE=2 SV=2	0.404159	0.0530524	0.237474	no hit	FALSE
UBXN7	O94888	UBX domain-containing protein 7 OS=Homo sapiens GN=UBXN7 PE=1 SV=2	0.4038	0.0906886	0.316688	no hit	FALSE
TXNL1	O43396	Thioredoxin-like protein 1 OS=Homo sapiens GN=TXNL1 PE=1 SV=3	0.4015	0.0226069	0.152718	enriched no hit	FALSE
LRRC8C	Q8TDW0	Volume-regulated anion channel subunit LRRC8C OS=Homo sapiens GN=LRRC8C PE=1 SV=2	0.400436	0.0381922	0.202121	enriched no hit	FALSE
SLC39A14	E5RFZ8|E5RGA7|E5RIP4|E5RJ40|E5RJG5|Q15043|Q15043-2|Q15043-3	Isoform 2 of Zinc transporter ZIP14 OS=Homo sapiens GN=SLC39A14|Isoform 3 of Zinc transporter ZIP14 OS=Homo sapiens GN=SLC39A14|Zinc transporter ZIP14 (Fragment) OS=Homo sapiens GN=SLC39A14 PE=1 SV=1|Zinc transporter ZIP14 (Fragment) OS=Homo sapiens GN=SLC39A14 PE=1 SV=2|Zinc transporter ZIP14 OS=Homo sapiens GN=SLC39A14 PE=1 SV=3	0.400307	0.0599117	0.250872	no hit	FALSE
MYSM1	Q5VVJ2	Histone H2A deubiquitinase MYSM1 OS=Homo sapiens GN=MYSM1 PE=1 SV=1	0.399827	0.0468988	0.225423	no hit	FALSE
C14orf166	Q9Y224	UPF0568 protein C14orf166 OS=Homo sapiens GN=C14orf166 PE=1 SV=1	0.399015	0.0707445	0.276307	no hit	FALSE
SETX	Q7Z333|Q7Z333-3|Q7Z333-4	Probable helicase senataxin OS=Homo sapiens GN=SETX PE=1 SV=4|Isoform 3 of Probable helicase senataxin OS=Homo sapiens GN=SETX|Isoform 4 of Probable helicase senataxin OS=Homo sapiens GN=SETX	0.398783	0.0099603	0.104979	no hit	FALSE
ARCN1	B0YIW6|P48444	Archain 1, isoform CRA_a OS=Homo sapiens GN=ARCN1 PE=1 SV=1|Coatomer subunit delta OS=Homo sapiens GN=ARCN1 PE=1 SV=1	0.397156	0.000782096	0.0341999	enriched no hit	FALSE
MED4	Q9NPJ6	Mediator of RNA polymerase II transcription subunit 4 OS=Homo sapiens GN=MED4 PE=1 SV=1	0.395775	0.00672082	0.0852806	no hit	FALSE
RNF219	Q5W0B1	RING finger protein 219 OS=Homo sapiens GN=RNF219 PE=1 SV=1	0.395314	0.00665129	0.0852806	no hit	FALSE
GTF3C3	Q9Y5Q9	General transcription factor 3C polypeptide 3 OS=Homo sapiens GN=GTF3C3 PE=1 SV=1	0.392355	0.00211908	0.0480818	no hit	FALSE
TSPYL1	Q9H0U9	Testis-specific Y-encoded-like protein 1 OS=Homo sapiens GN=TSPYL1 PE=1 SV=3	0.391817	0.0237618	0.155837	no hit	FALSE
HERC4	Q5GLZ8|Q5GLZ8-2|Q5GLZ8-3|Q5GLZ8-6	Isoform 2 of Probable E3 ubiquitin-protein ligase HERC4 OS=Homo sapiens GN=HERC4|Isoform 3 of Probable E3 ubiquitin-protein ligase HERC4 OS=Homo sapiens GN=HERC4|Isoform 6 of Probable E3 ubiquitin-protein ligase HERC4 OS=Homo sapiens GN=HERC4|Probable E3 ubiquitin-protein ligase HERC4 OS=Homo sapiens GN=HERC4 PE=1 SV=1	0.390518	0.00706686	0.0875845	enriched no hit	FALSE
GCC2	Q8IWJ2	GRIP and coiled-coil domain-containing protein 2 OS=Homo sapiens GN=GCC2 PE=1 SV=4	0.38812	0.0660653	0.26665	no hit	FALSE
MAGT1	A0A087WU53|Q9H0U3	Magnesium transporter protein 1 OS=Homo sapiens GN=MAGT1 PE=1 SV=1|Magnesium transporter protein 1 OS=Homo sapiens GN=MAGT1 PE=1 SV=1	0.385467	0.00396302	0.0688207	enriched no hit	FALSE
SAP30BP	J3QLH3|J3QQJ0|Q9UHR5|Q9UHR5-2|X6R3T8	Isoform 2 of SAP30-binding protein OS=Homo sapiens GN=SAP30BP|SAP30-binding protein (Fragment) OS=Homo sapiens GN=SAP30BP PE=1 SV=1|SAP30-binding protein OS=Homo sapiens GN=SAP30BP PE=1 SV=1	0.381596	0.00599519	0.0827757	no hit	FALSE
ANXA6	E5RK69|P08133|P08133-2	Annexin A6 OS=Homo sapiens GN=ANXA6 PE=1 SV=3|Annexin OS=Homo sapiens GN=ANXA6 PE=1 SV=1|Isoform 2 of Annexin A6 OS=Homo sapiens GN=ANXA6	0.380252	0.0587737	0.250026	no hit	FALSE
C18orf25|ARKL1	A0A087WVF1|K7EQH1|Q5BIX2|Q96B23|Q96B23-2	Uncharacterized protein C18orf25 OS=Homo sapiens GN=C18orf25 PE=1 SV=1|Uncharacterized protein C18orf25 (Fragment) OS=Homo sapiens GN=C18orf25 PE=1 SV=1|Chromosome 18 open reading frame 25, isoform CRA_a OS=Homo sapiens GN=ARKL1 PE=1 SV=1|Uncharacterized protein C18orf25 OS=Homo sapiens GN=C18orf25 PE=1 SV=2|Isoform 2 of Uncharacterized protein C18orf25 OS=Homo sapiens GN=C18orf25	0.379235	0.144259	0.405471	no hit	FALSE
ARFIP1	P53367|P53367-2|P53367-3	Arfaptin-1 OS=Homo sapiens GN=ARFIP1 PE=1 SV=2|Isoform A of Arfaptin-1 OS=Homo sapiens GN=ARFIP1|Isoform 3 of Arfaptin-1 OS=Homo sapiens GN=ARFIP1	0.37788	0.0978264	0.329719	no hit	FALSE
ASXH1|ASXL1	Q76L82|Q8IXJ9	Additional sex combs like 1 (Drosophila), isoform CRA_d OS=Homo sapiens GN=ASXH1 PE=1 SV=1|Putative Polycomb group protein ASXL1 OS=Homo sapiens GN=ASXL1 PE=1 SV=3	0.377663	0.00619392	0.0836614	no hit	FALSE
RNF216	Q9NWF9|Q9NWF9-1|Q9NWF9-3	E3 ubiquitin-protein ligase RNF216 OS=Homo sapiens GN=RNF216 PE=1 SV=3|Isoform 2 of E3 ubiquitin-protein ligase RNF216 OS=Homo sapiens GN=RNF216|Isoform 3 of E3 ubiquitin-protein ligase RNF216 OS=Homo sapiens GN=RNF216	0.377495	0.0121794	0.112125	no hit	FALSE
MAP3K7	O43318-2|O43318-4	Isoform 1A of Mitogen-activated protein kinase kinase kinase 7 OS=Homo sapiens GN=MAP3K7|Isoform 1D of Mitogen-activated protein kinase kinase kinase 7 OS=Homo sapiens GN=MAP3K7	0.375657	0.0126365	0.113656	enriched no hit	FALSE
TBC1D31	E5RI94|E7ERK7|E7EWW7|Q96DN5|Q96DN5-2|Q96DN5-3	Isoform 2 of TBC1 domain family member 31 OS=Homo sapiens GN=TBC1D31|Isoform 3 of TBC1 domain family member 31 OS=Homo sapiens GN=TBC1D31|TBC1 domain family member 31 OS=Homo sapiens GN=TBC1D31 PE=1 SV=1|TBC1 domain family member 31 OS=Homo sapiens GN=TBC1D31 PE=1 SV=2	0.375125	0.000834687	0.0345736	no hit	FALSE
HECTD1	Q9ULT8	E3 ubiquitin-protein ligase HECTD1 OS=Homo sapiens GN=HECTD1 PE=1 SV=3	0.374414	0.0751511	0.284688	enriched no hit	FALSE
EMSY	E9PMC9|Q7Z589|Q7Z589-2|Q7Z589-4|Q7Z589-5|Q7Z589-6|Q7Z589-7	BRCA2-interacting transcriptional repressor EMSY OS=Homo sapiens GN=EMSY PE=1 SV=1|BRCA2-interacting transcriptional repressor EMSY OS=Homo sapiens GN=EMSY PE=1 SV=2|Isoform 2 of BRCA2-interacting transcriptional repressor EMSY OS=Homo sapiens GN=EMSY|Isoform 4 of BRCA2-interacting transcriptional repressor EMSY OS=Homo sapiens GN=EMSY|Isoform 5 of BRCA2-interacting transcriptional repressor EMSY…	0.3707	0.000993828	0.0380346	no hit	FALSE
MED24	A0A0B4J1W0|B4DDR8|F5GY88|F5H5K2|O75448|O75448-2	Isoform 2 of Mediator of RNA polymerase II transcription subunit 24 OS=Homo sapiens GN=MED24|Mediator of RNA polymerase II transcription subunit 24 (Fragment) OS=Homo sapiens GN=MED24 PE=1 SV=2|Mediator of RNA polymerase II transcription subunit 24 OS=Homo sapiens GN=MED24 PE=1 SV=1|Mediator of RNA polymerase II transcription subunit 24 OS=Homo sapiens GN=MED24 PE=1 SV=2	0.370244	0.0182435	0.136247	no hit	FALSE
IGBP1	P78318	Immunoglobulin-binding protein 1 OS=Homo sapiens GN=IGBP1 PE=1 SV=1	0.369996	0.0111433	0.11002	no hit	FALSE
NPLOC4	A0A0D9SFI9|Q8TAT6|Q8TAT6-2	Isoform 2 of Nuclear protein localization protein 4 homolog OS=Homo sapiens GN=NPLOC4|Nuclear protein localization protein 4 homolog OS=Homo sapiens GN=NPLOC4 PE=1 SV=1|Nuclear protein localization protein 4 homolog OS=Homo sapiens GN=NPLOC4 PE=1 SV=3	0.369958	0.000822369	0.0345176	no hit	FALSE
SLC3A2	F5GZS6|F5H867|J3KPF3|P08195|P08195-2|P08195-3|P08195-4	4F2 cell-surface antigen heavy chain (Fragment) OS=Homo sapiens GN=SLC3A2 PE=1 SV=1|4F2 cell-surface antigen heavy chain OS=Homo sapiens GN=SLC3A2 PE=1 SV=1|4F2 cell-surface antigen heavy chain OS=Homo sapiens GN=SLC3A2 PE=1 SV=3|Isoform 2 of 4F2 cell-surface antigen heavy chain OS=Homo sapiens GN=SLC3A2|Isoform 3 of 4F2 cell-surface antigen heavy chain OS=Homo sapiens GN=SLC3A2|Isoform 4 of 4F2 …	0.369954	0.0475304	0.22568	no hit	FALSE
PLD3	Q8IV08	Phospholipase D3 OS=Homo sapiens GN=PLD3 PE=1 SV=1	0.368756	0.386381	0.654644	no hit	FALSE
NFE2L1	J9JIE5|Q14494|Q14494-2	Isoform 2 of Nuclear factor erythroid 2-related factor 1 OS=Homo sapiens GN=NFE2L1|Nuclear factor erythroid 2-related factor 1 OS=Homo sapiens GN=NFE2L1 PE=1 SV=1	0.366807	0.0053894	0.0800955	no hit	FALSE
CBX4	O00257|O00257-3	E3 SUMO-protein ligase CBX4 OS=Homo sapiens GN=CBX4 PE=1 SV=3|Isoform 2 of E3 SUMO-protein ligase CBX4 OS=Homo sapiens GN=CBX4	0.366582	0.0184363	0.136247	no hit	FALSE
ROBO1	A0A087WTM1|A0A087WZ85|A0A0A0MSX4|Q9Y6N7|Q9Y6N7-2|Q9Y6N7-3|Q9Y6N7-4|Q9Y6N7-5|Q9Y6N7-6	Isoform 2 of Roundabout homolog 1 OS=Homo sapiens GN=ROBO1|Isoform 3 of Roundabout homolog 1 OS=Homo sapiens GN=ROBO1|Isoform 4 of Roundabout homolog 1 OS=Homo sapiens GN=ROBO1|Isoform 5 of Roundabout homolog 1 OS=Homo sapiens GN=ROBO1|Isoform 6 of Roundabout homolog 1 OS=Homo sapiens GN=ROBO1|Roundabout homolog 1 OS=Homo sapiens GN=ROBO1 PE=1 SV=1	0.366094	0.0131922	0.116328	no hit	FALSE
ITSN2	A0A087WVF7|Q9NZM3|Q9NZM3-2	Intersectin-2 OS=Homo sapiens GN=ITSN2 PE=1 SV=1|Intersectin-2 OS=Homo sapiens GN=ITSN2 PE=1 SV=3|Isoform 2 of Intersectin-2 OS=Homo sapiens GN=ITSN2	0.365457	0.108177	0.345409	no hit	FALSE
RAD21	O60216	Double-strand-break repair protein rad21 homolog OS=Homo sapiens GN=RAD21 PE=1 SV=2	0.365421	0.00738858	0.088828	no hit	FALSE
TBC1D15	Q8TC07|Q8TC07-2|Q8TC07-3	TBC1 domain family member 15 OS=Homo sapiens GN=TBC1D15 PE=1 SV=2|Isoform 2 of TBC1 domain family member 15 OS=Homo sapiens GN=TBC1D15|Isoform 3 of TBC1 domain family member 15 OS=Homo sapiens GN=TBC1D15	0.364657	0.036959	0.199596	enriched no hit	FALSE
TNKS	E7EQ52|O95271	Poly [ADP-ribose] polymerase OS=Homo sapiens GN=TNKS PE=1 SV=1|Tankyrase-1 OS=Homo sapiens GN=TNKS PE=1 SV=2	0.363434	0.00820444	0.0935782	no hit	FALSE
MELK	Q14680|Q14680-2|Q14680-6|Q14680-7|Q14680-8	Isoform 2 of Maternal embryonic leucine zipper kinase OS=Homo sapiens GN=MELK|Isoform 6 of Maternal embryonic leucine zipper kinase OS=Homo sapiens GN=MELK|Isoform 7 of Maternal embryonic leucine zipper kinase OS=Homo sapiens GN=MELK|Isoform 8 of Maternal embryonic leucine zipper kinase OS=Homo sapiens GN=MELK|Maternal embryonic leucine zipper kinase OS=Homo sapiens GN=MELK PE=1 SV=3	0.362804	0.00925091	0.101118	enriched no hit	FALSE
FAM234B|DKFZp762C0813	A2RU67|Q69YM1	Protein FAM234B OS=Homo sapiens GN=FAM234B PE=1 SV=1|Protein FAM234B (Fragment) OS=Homo sapiens GN=DKFZp762C0813 PE=1 SV=1	0.362798	0.0581924	0.249877	no hit	FALSE
TNFAIP1	Q13829	BTB/POZ domain-containing adapter for CUL3-mediated RhoA degradation protein 2 OS=Homo sapiens GN=TNFAIP1 PE=1 SV=1	0.362199	0.0497802	0.231474	enriched no hit	FALSE
KDM5B	Q9UGL1|Q9UGL1-2	Lysine-specific demethylase 5B OS=Homo sapiens GN=KDM5B PE=1 SV=3|Isoform 2 of Lysine-specific demethylase 5B OS=Homo sapiens GN=KDM5B	0.361942	0.00560554	0.0805764	no hit	FALSE
IQGAP3	F2Z2E2|Q86VI3	Ras GTPase-activating-like protein IQGAP3 OS=Homo sapiens GN=IQGAP3 PE=1 SV=1|Ras GTPase-activating-like protein IQGAP3 OS=Homo sapiens GN=IQGAP3 PE=1 SV=2	0.360617	0.0015747	0.0435462	no hit	FALSE
NPAT	Q14207	Protein NPAT OS=Homo sapiens GN=NPAT PE=1 SV=3	0.360442	0.0087846	0.0977171	no hit	FALSE
CEP164	Q9UPV0|Q9UPV0-2	Centrosomal protein of 164 kDa OS=Homo sapiens GN=CEP164 PE=1 SV=3|Isoform 2 of Centrosomal protein of 164 kDa OS=Homo sapiens GN=CEP164	0.357891	0.0632333	0.260207	no hit	FALSE
NPC1	K7EQ23|O15118|O15118-2	Isoform 2 of Niemann-Pick C1 protein OS=Homo sapiens GN=NPC1|Niemann-Pick C1 protein (Fragment) OS=Homo sapiens GN=NPC1 PE=1 SV=1|Niemann-Pick C1 protein OS=Homo sapiens GN=NPC1 PE=1 SV=2	0.357777	0.0421323	0.214964	no hit	FALSE
CREB3L2	Q70SY1|Q70SY1-2	Cyclic AMP-responsive element-binding protein 3-like protein 2 OS=Homo sapiens GN=CREB3L2 PE=1 SV=3|Isoform 2 of Cyclic AMP-responsive element-binding protein 3-like protein 2 OS=Homo sapiens GN=CREB3L2	0.357555	0.0129113	0.114493	enriched no hit	FALSE
NEDD4L	Q96PU5|Q96PU5-2|Q96PU5-3|Q96PU5-5|Q96PU5-6|Q96PU5-7	E3 ubiquitin-protein ligase NEDD4-like OS=Homo sapiens GN=NEDD4L PE=1 SV=2|Isoform 2 of E3 ubiquitin-protein ligase NEDD4-like OS=Homo sapiens GN=NEDD4L|Isoform 3 of E3 ubiquitin-protein ligase NEDD4-like OS=Homo sapiens GN=NEDD4L|Isoform 5 of E3 ubiquitin-protein ligase NEDD4-like OS=Homo sapiens GN=NEDD4L|Isoform 6 of E3 ubiquitin-protein ligase NEDD4-like OS=Homo sapiens GN=NEDD4L|Isoform 7 of…	0.356126	0.0512032	0.234968	no hit	FALSE
SCYL2	A0A0U1RQQ9|F8VSC5|Q6P3W7	SCY1-like protein 2 (Fragment) OS=Homo sapiens GN=SCYL2 PE=1 SV=1|SCY1-like protein 2 OS=Homo sapiens GN=SCYL2 PE=1 SV=1	0.355702	0.0116703	0.110325	no hit	FALSE
VAMP7	P51809|P51809-3	Isoform 3 of Vesicle-associated membrane protein 7 OS=Homo sapiens GN=VAMP7|Vesicle-associated membrane protein 7 OS=Homo sapiens GN=VAMP7 PE=1 SV=3	0.355669	0.0180676	0.136059	no hit	FALSE
LSR	Q86X29|Q86X29-3|Q86X29-4|Q86X29-5|Q86X29-6|S4R3V8	Lipolysis-stimulated lipoprotein receptor OS=Homo sapiens GN=LSR PE=1 SV=4|Isoform 3 of Lipolysis-stimulated lipoprotein receptor OS=Homo sapiens GN=LSR|Isoform 4 of Lipolysis-stimulated lipoprotein receptor OS=Homo sapiens GN=LSR|Isoform 5 of Lipolysis-stimulated lipoprotein receptor OS=Homo sapiens GN=LSR|Isoform 6 of Lipolysis-stimulated lipoprotein receptor OS=Homo sapiens GN=LSR|Lipolysis-st…	0.350879	0.0183719	0.136247	no hit	FALSE
HNRNPUL1	A0A0A0MRA5|B7Z4B8|Q9BUJ2|Q9BUJ2-2|Q9BUJ2-4	Heterogeneous nuclear ribonucleoprotein U-like protein 1 OS=Homo sapiens GN=HNRNPUL1 PE=1 SV=1|Heterogeneous nuclear ribonucleoprotein U-like protein 1 OS=Homo sapiens GN=HNRNPUL1 PE=1 SV=1|Heterogeneous nuclear ribonucleoprotein U-like protein 1 OS=Homo sapiens GN=HNRNPUL1 PE=1 SV=2|Isoform 2 of Heterogeneous nuclear ribonucleoprotein U-like protein 1 OS=Homo sapiens GN=HNRNPUL1|Isoform 4 of Het…	0.350598	0.125688	0.377545	no hit	FALSE
DSG2	Q14126	Desmoglein-2 OS=Homo sapiens GN=DSG2 PE=1 SV=2	0.349945	0.0134302	0.117767	no hit	FALSE
GNPDA1	D6R9P4|D6RAY7|D6RFF8|P46926|P46926-2	Glucosamine-6-phosphate isomerase (Fragment) OS=Homo sapiens GN=GNPDA1 PE=1 SV=1|Glucosamine-6-phosphate isomerase 1 OS=Homo sapiens GN=GNPDA1 PE=1 SV=1|Glucosamine-6-phosphate isomerase OS=Homo sapiens GN=GNPDA1 PE=1 SV=1|Isoform 2 of Glucosamine-6-phosphate isomerase 1 OS=Homo sapiens GN=GNPDA1	0.349548	0.0683704	0.271071	enriched no hit	FALSE
C1orf112	Q9NSG2|Q9NSG2-2|Q9NSG2-3	Uncharacterized protein C1orf112 OS=Homo sapiens GN=C1orf112 PE=1 SV=1|Isoform 2 of Uncharacterized protein C1orf112 OS=Homo sapiens GN=C1orf112|Isoform 3 of Uncharacterized protein C1orf112 OS=Homo sapiens GN=C1orf112	0.348954	0.00640058	0.0839751	no hit	FALSE
PSMB4	P28070	Proteasome subunit beta type-4 OS=Homo sapiens GN=PSMB4 PE=1 SV=4	0.348457	0.112722	0.354319	no hit	FALSE
UBR2	Q8IWV8|Q8IWV8-4	E3 ubiquitin-protein ligase UBR2 OS=Homo sapiens GN=UBR2 PE=1 SV=1|Isoform 4 of E3 ubiquitin-protein ligase UBR2 OS=Homo sapiens GN=UBR2	0.346417	0.044775	0.221984	no hit	FALSE
PIBF1	A0A087WUI6|Q8WXW3	Progesterone-induced-blocking factor 1 OS=Homo sapiens GN=PIBF1 PE=1 SV=1|Progesterone-induced-blocking factor 1 OS=Homo sapiens GN=PIBF1 PE=1 SV=2	0.345435	0.00403194	0.0688207	no hit	FALSE
IMPDH2	H0Y4R1|P12268	Inosine-5'-monophosphate dehydrogenase 2 (Fragment) OS=Homo sapiens GN=IMPDH2 PE=1 SV=1|Inosine-5'-monophosphate dehydrogenase 2 OS=Homo sapiens GN=IMPDH2 PE=1 SV=2	0.344562	0.0246313	0.158892	enriched no hit	FALSE
BRAP	J3KNN7|Q7Z569	BRCA1-associated protein OS=Homo sapiens GN=BRAP PE=1 SV=1|BRCA1-associated protein OS=Homo sapiens GN=BRAP PE=1 SV=2	0.34445	0.018038	0.136059	no hit	FALSE
CDC34	P49427	Ubiquitin-conjugating enzyme E2 R1 OS=Homo sapiens GN=CDC34 PE=1 SV=2	0.34249	0.0501133	0.232337	enriched no hit	FALSE
KIF18B	A0A0C4DGP2|A0A0C4DGP5|Q86Y91|Q86Y91-2|Q86Y91-3|Q86Y91-4	Isoform 2 of Kinesin-like protein KIF18B OS=Homo sapiens GN=KIF18B|Isoform 3 of Kinesin-like protein KIF18B OS=Homo sapiens GN=KIF18B|Isoform 4 of Kinesin-like protein KIF18B OS=Homo sapiens GN=KIF18B|Kinesin-like protein KIF18B OS=Homo sapiens GN=KIF18B PE=1 SV=3|Kinesin-like protein OS=Homo sapiens GN=KIF18B PE=1 SV=1	0.342458	0.0235817	0.15563	no hit	FALSE
SPRYD3	F8VWW7|Q8NCJ5	SPRY domain-containing protein 3 OS=Homo sapiens GN=SPRYD3 PE=1 SV=1|SPRY domain-containing protein 3 OS=Homo sapiens GN=SPRYD3 PE=1 SV=2	0.341606	0.0118413	0.110941	enriched no hit	FALSE
OFD1	A6NF31|O75665|O75665-3	Isoform 3 of Oral-facial-digital syndrome 1 protein OS=Homo sapiens GN=OFD1|Oral-facial-digital syndrome 1 protein OS=Homo sapiens GN=OFD1 PE=1 SV=1	0.341594	0.0167784	0.130691	no hit	FALSE
FAF1	Q9UNN5	FAS-associated factor 1 OS=Homo sapiens GN=FAF1 PE=1 SV=2	0.340736	0.0185673	0.136247	enriched no hit	FALSE
VPS13B	Q7Z7G8|Q7Z7G8-2|Q7Z7G8-6	Vacuolar protein sorting-associated protein 13B OS=Homo sapiens GN=VPS13B PE=1 SV=2|Isoform 2 of Vacuolar protein sorting-associated protein 13B OS=Homo sapiens GN=VPS13B|Isoform 6 of Vacuolar protein sorting-associated protein 13B OS=Homo sapiens GN=VPS13B	0.340105	0.00179439	0.0452735	no hit	FALSE
KIAA0368|ECM29	J3KN16|Q5VYK3	Proteasome-associated protein ECM29 homolog OS=Homo sapiens GN=KIAA0368 PE=1 SV=1|Proteasome-associated protein ECM29 homolog OS=Homo sapiens GN=ECM29 PE=1 SV=2	0.340008	0.0592917	0.250301	no hit	FALSE
BIRC2	E9PMH5|Q13490|Q13490-2	Baculoviral IAP repeat-containing protein 2 OS=Homo sapiens GN=BIRC2 PE=1 SV=1|Baculoviral IAP repeat-containing protein 2 OS=Homo sapiens GN=BIRC2 PE=1 SV=2|Isoform 2 of Baculoviral IAP repeat-containing protein 2 OS=Homo sapiens GN=BIRC2	0.338941	0.0846564	0.303875	no hit	FALSE
GATAD2B	A0A0U1RRM1|Q8WXI9	Transcriptional repressor p66-beta OS=Homo sapiens GN=GATAD2B PE=1 SV=1|Transcriptional repressor p66-beta OS=Homo sapiens GN=GATAD2B PE=1 SV=1	0.338715	0.0330434	0.187425	no hit	FALSE
VAT1	Q99536	Synaptic vesicle membrane protein VAT-1 homolog OS=Homo sapiens GN=VAT1 PE=1 SV=2	0.338333	0.209915	0.492135	no hit	FALSE
STX5	Q13190|Q13190-2|Q13190-3|Q13190-4	Isoform 2 of Syntaxin-5 OS=Homo sapiens GN=STX5|Isoform 3 of Syntaxin-5 OS=Homo sapiens GN=STX5|Isoform 4 of Syntaxin-5 OS=Homo sapiens GN=STX5|Syntaxin-5 OS=Homo sapiens GN=STX5 PE=1 SV=2	0.33826	0.00125811	0.0406476	no hit	FALSE
CIAPIN1	H3BPG7|H3BT65|H3BUG4|H3BV90|Q6FI81|Q6FI81-3	Anamorsin OS=Homo sapiens GN=CIAPIN1 PE=1 SV=1|Anamorsin OS=Homo sapiens GN=CIAPIN1 PE=1 SV=1|Anamorsin OS=Homo sapiens GN=CIAPIN1 PE=1 SV=1|Fe-S cluster assembly protein DRE2 OS=Homo sapiens GN=CIAPIN1 PE=1 SV=1|Anamorsin OS=Homo sapiens GN=CIAPIN1 PE=1 SV=2|Isoform 3 of Anamorsin OS=Homo sapiens GN=CIAPIN1	0.337641	0.0489689	0.229055	no hit	FALSE
DNAJA1	P31689	DnaJ homolog subfamily A member 1 OS=Homo sapiens GN=DNAJA1 PE=1 SV=2	0.336115	0.0393872	0.205965	no hit	FALSE
MFN1	A0A0C4DFN1|Q8IWA4|Q8IWA4-3	Mitofusin-1 OS=Homo sapiens GN=MFN1 PE=1 SV=1|Mitofusin-1 OS=Homo sapiens GN=MFN1 PE=1 SV=2|Isoform 3 of Mitofusin-1 OS=Homo sapiens GN=MFN1	0.335893	0.00261825	0.0549484	no hit	FALSE
RPS7	P62081	40S ribosomal protein S7 OS=Homo sapiens GN=RPS7 PE=1 SV=1	0.335313	0.092147	0.318091	enriched no hit	FALSE
PRKAR1A	P10644|P10644-2	cAMP-dependent protein kinase type I-alpha regulatory subunit OS=Homo sapiens GN=PRKAR1A PE=1 SV=1|Isoform 2 of cAMP-dependent protein kinase type I-alpha regulatory subunit OS=Homo sapiens GN=PRKAR1A	0.335193	0.011576	0.110325	no hit	FALSE
CD46	P15529-15|P15529-16|P15529-2|P15529-3|P15529-4|P15529-5|P15529-6|P15529-7	Isoform 3 of Membrane cofactor protein OS=Homo sapiens GN=CD46|Isoform B of Membrane cofactor protein OS=Homo sapiens GN=CD46|Isoform D of Membrane cofactor protein OS=Homo sapiens GN=CD46|Isoform F of Membrane cofactor protein OS=Homo sapiens GN=CD46|Isoform H of Membrane cofactor protein OS=Homo sapiens GN=CD46|Isoform J of Membrane cofactor protein OS=Homo sapiens GN=CD46|Isoform K of Membrane…	0.331843	0.073478	0.282042	no hit	FALSE
CDC23	Q9UJX2|Q9UJX2-3	Cell division cycle protein 23 homolog OS=Homo sapiens GN=CDC23 PE=1 SV=3|Isoform 3 of Cell division cycle protein 23 homolog OS=Homo sapiens GN=CDC23	0.331486	0.0189036	0.137752	enriched no hit	FALSE
HOOK1	Q9UJC3|Q9UJC3-2	Protein Hook homolog 1 OS=Homo sapiens GN=HOOK1 PE=1 SV=2|Isoform 2 of Protein Hook homolog 1 OS=Homo sapiens GN=HOOK1	0.330863	0.0661656	0.26665	no hit	FALSE
FANCI	Q9NVI1|Q9NVI1-1|Q9NVI1-2	Fanconi anemia group I protein OS=Homo sapiens GN=FANCI PE=1 SV=4|Isoform 1 of Fanconi anemia group I protein OS=Homo sapiens GN=FANCI|Isoform 2 of Fanconi anemia group I protein OS=Homo sapiens GN=FANCI	0.330502	0.0111224	0.11002	no hit	FALSE
MPDZ	F5H1U9|O75970|O75970-2|O75970-3|O75970-5	Isoform 2 of Multiple PDZ domain protein OS=Homo sapiens GN=MPDZ|Isoform 3 of Multiple PDZ domain protein OS=Homo sapiens GN=MPDZ|Isoform 4 of Multiple PDZ domain protein OS=Homo sapiens GN=MPDZ|Multiple PDZ domain protein OS=Homo sapiens GN=MPDZ PE=1 SV=1|Multiple PDZ domain protein OS=Homo sapiens GN=MPDZ PE=1 SV=2	0.329454	0.00333239	0.0613471	no hit	FALSE
PLSCR1	C9J0H3|C9J7K9|C9J9P4|C9JE06|O15162|O15162-2	Isoform 2 of Phospholipid scramblase 1 OS=Homo sapiens GN=PLSCR1|Phospholipid scramblase 1 (Fragment) OS=Homo sapiens GN=PLSCR1 PE=1 SV=1|Phospholipid scramblase 1 OS=Homo sapiens GN=PLSCR1 PE=1 SV=1	0.329268	0.154429	0.420353	no hit	FALSE
MYCBP2	O75592|O75592-2	E3 ubiquitin-protein ligase MYCBP2 OS=Homo sapiens GN=MYCBP2 PE=1 SV=3|Isoform 2 of E3 ubiquitin-protein ligase MYCBP2 OS=Homo sapiens GN=MYCBP2	0.328979	0.0507458	0.234526	no hit	FALSE
TMEM57	Q8N5G2	Macoilin OS=Homo sapiens GN=TMEM57 PE=1 SV=1	0.32826	0.0178234	0.135866	no hit	FALSE
PSMB2	P49721	Proteasome subunit beta type-2 OS=Homo sapiens GN=PSMB2 PE=1 SV=1	0.326239	0.142312	0.402608	enriched no hit	FALSE
PSMA5	P28066	Proteasome subunit alpha type-5 OS=Homo sapiens GN=PSMA5 PE=1 SV=3	0.325836	0.15349	0.419433	no hit	FALSE
TDP2	O95551|O95551-2	Tyrosyl-DNA phosphodiesterase 2 OS=Homo sapiens GN=TDP2 PE=1 SV=1|Isoform 2 of Tyrosyl-DNA phosphodiesterase 2 OS=Homo sapiens GN=TDP2	0.3253	0.0576885	0.249113	enriched no hit	FALSE
VCP	P55072	Transitional endoplasmic reticulum ATPase OS=Homo sapiens GN=VCP PE=1 SV=4	0.325205	0.073736	0.282042	no hit	FALSE
TRABD	J3KPT4|Q9H4I3	TraB domain-containing protein OS=Homo sapiens GN=TRABD PE=1 SV=1|TraB domain-containing protein OS=Homo sapiens GN=TRABD PE=1 SV=1	0.325038	0.0626376	0.258431	no hit	FALSE
LRP6	F5H7J9|H0YGW5|O75581	Low-density lipoprotein receptor-related protein 6 OS=Homo sapiens GN=LRP6 PE=1 SV=1|Low-density lipoprotein receptor-related protein 6 (Fragment) OS=Homo sapiens GN=LRP6 PE=1 SV=1|Low-density lipoprotein receptor-related protein 6 OS=Homo sapiens GN=LRP6 PE=1 SV=2	0.324254	0.00214355	0.0481993	no hit	FALSE
CPD	O75976|O75976-2	Carboxypeptidase D OS=Homo sapiens GN=CPD PE=1 SV=2|Isoform 2 of Carboxypeptidase D OS=Homo sapiens GN=CPD	0.324164	0.0221773	0.150786	no hit	FALSE
ABCA3	H0Y3H2|Q99758	ATP-binding cassette sub-family A member 3 OS=Homo sapiens GN=ABCA3 PE=1 SV=1|ATP-binding cassette sub-family A member 3 OS=Homo sapiens GN=ABCA3 PE=1 SV=2	0.323339	0.00811951	0.0929462	no hit	FALSE
RPL30	A0A0C4DH44|P62888	60S ribosomal protein L30 OS=Homo sapiens GN=RPL30 PE=1 SV=1|60S ribosomal protein L30 OS=Homo sapiens GN=RPL30 PE=1 SV=2	0.32288	0.0291374	0.17405	no hit	FALSE
GGA1	B0QYR6|Q9UJY5|Q9UJY5-2|Q9UJY5-3|Q9UJY5-4|Q9UJY5-6	ADP-ribosylation factor-binding protein GGA1 (Fragment) OS=Homo sapiens GN=GGA1 PE=1 SV=1|ADP-ribosylation factor-binding protein GGA1 OS=Homo sapiens GN=GGA1 PE=1 SV=1|Isoform 2 of ADP-ribosylation factor-binding protein GGA1 OS=Homo sapiens GN=GGA1|Isoform 3 of ADP-ribosylation factor-binding protein GGA1 OS=Homo sapiens GN=GGA1|Isoform 4 of ADP-ribosylation factor-binding protein GGA1 OS=Homo …	0.321917	0.206017	0.486528	no hit	FALSE
DPY19L4	Q7Z388	Probable C-mannosyltransferase DPY19L4 OS=Homo sapiens GN=DPY19L4 PE=1 SV=1	0.321917	0.0661259	0.26665	no hit	FALSE
SLC1A3	A0A087WT87|A0A087X0U3|P43003|P43003-2	Excitatory amino acid transporter 1 OS=Homo sapiens GN=SLC1A3 PE=1 SV=1|Isoform 2 of Excitatory amino acid transporter 1 OS=Homo sapiens GN=SLC1A3	0.32149	0.0521431	0.236656	enriched no hit	FALSE
RNF213	A0A0A0MTC1|A0A0A0MTR7|Q63HN8|Q63HN8-4	E3 ubiquitin-protein ligase RNF213 OS=Homo sapiens GN=RNF213 PE=1 SV=1|E3 ubiquitin-protein ligase RNF213 OS=Homo sapiens GN=RNF213 PE=1 SV=3|Isoform 2 of E3 ubiquitin-protein ligase RNF213 OS=Homo sapiens GN=RNF213	0.321482	0.00624537	0.0836614	no hit	FALSE
NISCH	Q9Y2I1	Nischarin OS=Homo sapiens GN=NISCH PE=1 SV=3	0.321069	0.00478728	0.0749769	no hit	FALSE
ESYT1	Q9BSJ8|Q9BSJ8-2	Extended synaptotagmin-1 OS=Homo sapiens GN=ESYT1 PE=1 SV=1|Isoform 2 of Extended synaptotagmin-1 OS=Homo sapiens GN=ESYT1	0.318696	0.0116408	0.110325	no hit	FALSE
IQCB1	Q15051	IQ calmodulin-binding motif-containing protein 1 OS=Homo sapiens GN=IQCB1 PE=1 SV=1	0.318177	0.0290141	0.17405	no hit	FALSE
TCTN3	A0A0C4DFN5|Q6NUS6|Q6NUS6-2|Q6NUS6-3	Chromosome 10 open reading frame 61 OS=Homo sapiens GN=TCTN3 PE=1 SV=1|Tectonic-3 OS=Homo sapiens GN=TCTN3 PE=1 SV=2|Isoform 2 of Tectonic-3 OS=Homo sapiens GN=TCTN3|Isoform 3 of Tectonic-3 OS=Homo sapiens GN=TCTN3	0.316611	0.0328997	0.186946	no hit	FALSE
SGTA	O43765	Small glutamine-rich tetratricopeptide repeat-containing protein alpha OS=Homo sapiens GN=SGTA PE=1 SV=1	0.313591	0.211207	0.494333	no hit	FALSE
NCAPD3	P42695	Condensin-2 complex subunit D3 OS=Homo sapiens GN=NCAPD3 PE=1 SV=2	0.312642	0.0102919	0.106928	no hit	FALSE
MAGED2	Q5H907|Q9UNF1	Melanoma-associated antigen D2 OS=Homo sapiens GN=MAGED2 PE=1 SV=2|Melanoma antigen family D, 2, isoform CRA_d OS=Homo sapiens GN=MAGED2 PE=1 SV=1	0.311905	0.0833136	0.301461	no hit	FALSE
IRS4	O14654	Insulin receptor substrate 4 OS=Homo sapiens GN=IRS4 PE=1 SV=1	0.311764	0.0229708	0.154513	no hit	FALSE
PLEKHH3	Q7Z736|Q7Z736-2|Q7Z736-3|Q7Z736-4|X6R3U4	Isoform 2 of Pleckstrin homology domain-containing family H member 3 OS=Homo sapiens GN=PLEKHH3|Isoform 3 of Pleckstrin homology domain-containing family H member 3 OS=Homo sapiens GN=PLEKHH3|Isoform 4 of Pleckstrin homology domain-containing family H member 3 OS=Homo sapiens GN=PLEKHH3|Pleckstrin homology domain-containing family H member 3 OS=Homo sapiens GN=PLEKHH3 PE=1 SV=1|Pleckstrin homolog…	0.310667	0.061324	0.25401	no hit	FALSE
KIAA1586	F5H2N6|Q9HCI6|Q9HCI6-2	E3 SUMO-protein ligase KIAA1586 OS=Homo sapiens GN=KIAA1586 PE=1 SV=1|E3 SUMO-protein ligase KIAA1586 OS=Homo sapiens GN=KIAA1586 PE=1 SV=2|Isoform 2 of E3 SUMO-protein ligase KIAA1586 OS=Homo sapiens GN=KIAA1586	0.310509	0.0519586	0.236656	no hit	FALSE
KAT2A	Q92830|Q92830-2	Histone acetyltransferase KAT2A OS=Homo sapiens GN=KAT2A PE=1 SV=3|Isoform 2 of Histone acetyltransferase KAT2A OS=Homo sapiens GN=KAT2A	0.310244	0.105642	0.342493	no hit	FALSE
CCDC77	Q9BR77|Q9BR77-2	Coiled-coil domain-containing protein 77 OS=Homo sapiens GN=CCDC77 PE=2 SV=1|Isoform 2 of Coiled-coil domain-containing protein 77 OS=Homo sapiens GN=CCDC77	0.31005	0.0159794	0.129067	no hit	FALSE
USP15	Q9Y4E8|Q9Y4E8-2|Q9Y4E8-3	Isoform 2 of Ubiquitin carboxyl-terminal hydrolase 15 OS=Homo sapiens GN=USP15|Isoform 3 of Ubiquitin carboxyl-terminal hydrolase 15 OS=Homo sapiens GN=USP15|Ubiquitin carboxyl-terminal hydrolase 15 OS=Homo sapiens GN=USP15 PE=1 SV=3	0.309392	0.0585102	0.249877	no hit	FALSE
NEK2	F6U4U2|P51955|P51955-2|P51955-3|P51955-4	Isoform 2 of Serine/threonine-protein kinase Nek2 OS=Homo sapiens GN=NEK2|Isoform 3 of Serine/threonine-protein kinase Nek2 OS=Homo sapiens GN=NEK2|Isoform 4 of Serine/threonine-protein kinase Nek2 OS=Homo sapiens GN=NEK2|Serine/threonine-protein kinase Nek2 OS=Homo sapiens GN=NEK2 PE=1 SV=1	0.309046	0.0608461	0.253031	enriched no hit	FALSE
XPC	Q01831|Q01831-2	DNA repair protein complementing XP-C cells OS=Homo sapiens GN=XPC PE=1 SV=4|Isoform 2 of DNA repair protein complementing XP-C cells OS=Homo sapiens GN=XPC	0.308812	0.107636	0.345409	no hit	FALSE
PAFAH1B1	P43034	Platelet-activating factor acetylhydrolase IB subunit alpha OS=Homo sapiens GN=PAFAH1B1 PE=1 SV=2	0.307835	0.0955561	0.325551	enriched no hit	FALSE
FADS1	A0A0A0MR51|O60427	Fatty acid desaturase 1 OS=Homo sapiens GN=FADS1 PE=1 SV=1|Fatty acid desaturase 1 OS=Homo sapiens GN=FADS1 PE=1 SV=3	0.30774	0.079588	0.292349	no hit	FALSE
LRIF1	Q5T3J3	Ligand-dependent nuclear receptor-interacting factor 1 OS=Homo sapiens GN=LRIF1 PE=1 SV=1	0.307198	0.0578588	0.249165	no hit	FALSE
MGEA5	O60502|O60502-4	Isoform 4 of Protein O-GlcNAcase OS=Homo sapiens GN=MGEA5|Protein O-GlcNAcase OS=Homo sapiens GN=MGEA5 PE=1 SV=2	0.306888	0.0167544	0.130691	no hit	FALSE
CCNF	P41002	Cyclin-F OS=Homo sapiens GN=CCNF PE=1 SV=2	0.30595	0.0481426	0.227216	no hit	FALSE
HERC3	H0Y8G9|Q15034	Probable E3 ubiquitin-protein ligase HERC3 (Fragment) OS=Homo sapiens GN=HERC3 PE=1 SV=1|Probable E3 ubiquitin-protein ligase HERC3 OS=Homo sapiens GN=HERC3 PE=1 SV=1	0.304452	0.0126831	0.11375	enriched no hit	FALSE
FNDC3B	Q53EP0|Q53EP0-2	Fibronectin type III domain-containing protein 3B OS=Homo sapiens GN=FNDC3B PE=1 SV=2|Isoform 2 of Fibronectin type III domain-containing protein 3B OS=Homo sapiens GN=FNDC3B	0.304178	0.0188037	0.137341	no hit	FALSE
ANKRD13A	Q8IZ07	Ankyrin repeat domain-containing protein 13A OS=Homo sapiens GN=ANKRD13A PE=1 SV=3	0.303801	0.0462693	0.224899	no hit	FALSE
HJURP	C9JWC4|Q8NCD3|Q8NCD3-2|Q8NCD3-3	Holliday junction recognition protein (Fragment) OS=Homo sapiens GN=HJURP PE=1 SV=1|Holliday junction recognition protein OS=Homo sapiens GN=HJURP PE=1 SV=2|Isoform 2 of Holliday junction recognition protein OS=Homo sapiens GN=HJURP|Isoform 3 of Holliday junction recognition protein OS=Homo sapiens GN=HJURP	0.302961	0.0606983	0.253031	no hit	FALSE
ITGB1	P05556	Integrin beta-1 OS=Homo sapiens GN=ITGB1 PE=1 SV=2	0.302919	0.066216	0.26665	no hit	FALSE
VCPIP1	Q96JH7	Deubiquitinating protein VCIP135 OS=Homo sapiens GN=VCPIP1 PE=1 SV=2	0.301445	0.0143865	0.120449	no hit	FALSE
CYBA	P13498	Cytochrome b-245 light chain OS=Homo sapiens GN=CYBA PE=1 SV=3	0.30039	0.00662878	0.0852806	enriched no hit	FALSE
WDR4	P57081|P57081-2	tRNA (guanine-N(7)-)-methyltransferase non-catalytic subunit WDR4 OS=Homo sapiens GN=WDR4 PE=1 SV=2|Isoform 2 of tRNA (guanine-N(7)-)-methyltransferase non-catalytic subunit WDR4 OS=Homo sapiens GN=WDR4	0.300278	0.016115	0.129222	no hit	FALSE
GNAS	P63092|P63092-3|P63092-4|Q5JWF2	Guanine nucleotide-binding protein G(s) subunit alpha isoforms short OS=Homo sapiens GN=GNAS PE=1 SV=1|Guanine nucleotide-binding protein G(s) subunit alpha isoforms XLas OS=Homo sapiens GN=GNAS PE=1 SV=2|Isoform 3 of Guanine nucleotide-binding protein G(s) subunit alpha isoforms short OS=Homo sapiens GN=GNAS|Isoform 4 of Guanine nucleotide-binding protein G(s) subunit alpha isoforms short OS=Hom…	0.300223	0.0265902	0.164776	enriched no hit	FALSE
CDC73	Q6P1J9	Parafibromin OS=Homo sapiens GN=CDC73 PE=1 SV=1	0.300176	0.00850854	0.0956603	no hit	FALSE
WLS	Q5T9L3|Q5T9L3-2	Protein wntless homolog OS=Homo sapiens GN=WLS PE=1 SV=2|Isoform 2 of Protein wntless homolog OS=Homo sapiens GN=WLS	0.299675	0.0428868	0.216706	no hit	FALSE
NUF2	Q9BZD4	Kinetochore protein Nuf2 OS=Homo sapiens GN=NUF2 PE=1 SV=2	0.299277	0.0399931	0.207411	enriched no hit	FALSE
HIPK1	J3KP92|Q5SQL3|Q86Z02|Q86Z02-2|Q86Z02-3|Q86Z02-4	Homeodomain-interacting protein kinase 1 OS=Homo sapiens GN=HIPK1 PE=1 SV=1|Isoform 2 of Homeodomain-interacting protein kinase 1 OS=Homo sapiens GN=HIPK1|Isoform 3 of Homeodomain-interacting protein kinase 1 OS=Homo sapiens GN=HIPK1|Isoform 4 of Homeodomain-interacting protein kinase 1 OS=Homo sapiens GN=HIPK1	0.298645	0.120522	0.368172	no hit	FALSE
WRNIP1	Q96S55|Q96S55-2	ATPase WRNIP1 OS=Homo sapiens GN=WRNIP1 PE=1 SV=2|Isoform 2 of ATPase WRNIP1 OS=Homo sapiens GN=WRNIP1	0.298421	0.116204	0.360759	no hit	FALSE
CACHD1	A0A0A0MQY7|Q5VU97	VWFA and cache domain-containing protein 1 OS=Homo sapiens GN=CACHD1 PE=1 SV=1|VWFA and cache domain-containing protein 1 OS=Homo sapiens GN=CACHD1 PE=2 SV=2	0.298142	0.0157835	0.128721	no hit	FALSE
CDC7	O00311	Cell division cycle 7-related protein kinase OS=Homo sapiens GN=CDC7 PE=1 SV=1	0.297557	0.105937	0.342743	no hit	FALSE
HAUS3	Q68CZ6	HAUS augmin-like complex subunit 3 OS=Homo sapiens GN=HAUS3 PE=1 SV=1	0.297556	0.016342	0.129595	enriched no hit	FALSE
ZNF281	Q9Y2X9|Q9Y2X9-2	Zinc finger protein 281 OS=Homo sapiens GN=ZNF281 PE=1 SV=1|Isoform 2 of Zinc finger protein 281 OS=Homo sapiens GN=ZNF281	0.297398	0.00844293	0.0952629	no hit	FALSE
IFIT5	Q13325|Q13325-2	Interferon-induced protein with tetratricopeptide repeats 5 OS=Homo sapiens GN=IFIT5 PE=1 SV=1|Isoform 2 of Interferon-induced protein with tetratricopeptide repeats 5 OS=Homo sapiens GN=IFIT5	0.29592	0.0563561	0.245719	no hit	FALSE
POLD1	M0R2B7|P28340	DNA polymerase OS=Homo sapiens GN=POLD1 PE=1 SV=1|DNA polymerase delta catalytic subunit OS=Homo sapiens GN=POLD1 PE=1 SV=2	0.294559	0.0519142	0.236656	no hit	FALSE
ZNF518A	Q6AHZ1	Zinc finger protein 518A OS=Homo sapiens GN=ZNF518A PE=1 SV=2	0.29445	0.016606	0.130691	no hit	FALSE
CCP110	O43303|O43303-2	Centriolar coiled-coil protein of 110 kDa OS=Homo sapiens GN=CCP110 PE=1 SV=3|Isoform 2 of Centriolar coiled-coil protein of 110 kDa OS=Homo sapiens GN=CCP110	0.293788	0.054724	0.241576	no hit	FALSE
PI4K2A	Q9BTU6	Phosphatidylinositol 4-kinase type 2-alpha OS=Homo sapiens GN=PI4K2A PE=1 SV=1	0.29335	0.0246122	0.158892	no hit	FALSE
UBAC2	Q8NBM4|Q8NBM4-2|Q8NBM4-3|Q8NBM4-4|X6R5E5	Isoform 2 of Ubiquitin-associated domain-containing protein 2 OS=Homo sapiens GN=UBAC2|Isoform 3 of Ubiquitin-associated domain-containing protein 2 OS=Homo sapiens GN=UBAC2|Isoform 4 of Ubiquitin-associated domain-containing protein 2 OS=Homo sapiens GN=UBAC2|Ubiquitin-associated domain-containing protein 2 (Fragment) OS=Homo sapiens GN=UBAC2 PE=1 SV=1|Ubiquitin-associated domain-containing prot…	0.293253	0.0118228	0.110941	no hit	FALSE
SIMC1	F6R0L0	SUMO-interacting motif-containing protein 1 OS=Homo sapiens GN=SIMC1 PE=1 SV=1	0.292802	0.0282342	0.17225	no hit	FALSE
MAGED4	Q96JG8|Q96JG8-2|Q96JG8-4	Melanoma-associated antigen D4 OS=Homo sapiens GN=MAGED4 PE=1 SV=3|Isoform 2 of Melanoma-associated antigen D4 OS=Homo sapiens GN=MAGED4|Isoform 4 of Melanoma-associated antigen D4 OS=Homo sapiens GN=MAGED4	0.292345	0.0573829	0.248526	no hit	FALSE
SNX18	Q96RF0|Q96RF0-2|Q96RF0-3	Isoform 2 of Sorting nexin-18 OS=Homo sapiens GN=SNX18|Isoform 3 of Sorting nexin-18 OS=Homo sapiens GN=SNX18|Sorting nexin-18 OS=Homo sapiens GN=SNX18 PE=1 SV=2	0.292087	0.0919945	0.318091	no hit	FALSE
GIT2	F8VXI9|F8WAK2|Q14161|Q14161-10|Q14161-3|Q14161-4|Q14161-5|Q14161-8|R4GNG3	ARF GTPase-activating protein GIT2 OS=Homo sapiens GN=GIT2 PE=1 SV=1|ARF GTPase-activating protein GIT2 OS=Homo sapiens GN=GIT2 PE=1 SV=1|ARF GTPase-activating protein GIT2 OS=Homo sapiens GN=GIT2 PE=1 SV=2|Isoform 10 of ARF GTPase-activating protein GIT2 OS=Homo sapiens GN=GIT2|Isoform 3 of ARF GTPase-activating protein GIT2 OS=Homo sapiens GN=GIT2|Isoform 4 of ARF GTPase-activating protein GIT2…	0.291487	0.0580658	0.249715	no hit	FALSE
EMC3	Q9P0I2|Q9P0I2-2	ER membrane protein complex subunit 3 OS=Homo sapiens GN=EMC3 PE=1 SV=3|Isoform 2 of ER membrane protein complex subunit 3 OS=Homo sapiens GN=EMC3	0.291404	0.00461488	0.0730033	no hit	FALSE
RNF10	Q8N5U6|Q8N5U6-2	RING finger protein 10 OS=Homo sapiens GN=RNF10 PE=1 SV=2|Isoform 2 of RING finger protein 10 OS=Homo sapiens GN=RNF10	0.291223	0.0642247	0.262912	enriched no hit	FALSE
CEP152	O94986|O94986-3	Centrosomal protein of 152 kDa OS=Homo sapiens GN=CEP152 PE=1 SV=4|Isoform 3 of Centrosomal protein of 152 kDa OS=Homo sapiens GN=CEP152	0.290169	0.032012	0.18423	no hit	FALSE
RTEL1-TNFRSF6B|RTEL1	F6WH68|Q9NZ71|Q9NZ71-2|Q9NZ71-4|Q9NZ71-6|Q9NZ71-7|Q9NZ71-8|Q9NZ71-9	Isoform 1 of Regulator of telomere elongation helicase 1 OS=Homo sapiens GN=RTEL1|Isoform 4 of Regulator of telomere elongation helicase 1 OS=Homo sapiens GN=RTEL1|Isoform 6 of Regulator of telomere elongation helicase 1 OS=Homo sapiens GN=RTEL1|Isoform 7 of Regulator of telomere elongation helicase 1 OS=Homo sapiens GN=RTEL1|Isoform 8 of Regulator of telomere elongation helicase 1 OS=Homo sapien…	0.289453	0.102974	0.337667	no hit	FALSE
FBXO11	Q86XK2|Q86XK2-5|Q86XK2-6	F-box only protein 11 OS=Homo sapiens GN=FBXO11 PE=1 SV=3|Isoform 5 of F-box only protein 11 OS=Homo sapiens GN=FBXO11|Isoform 6 of F-box only protein 11 OS=Homo sapiens GN=FBXO11	0.28921	0.010223	0.106563	no hit	FALSE
INTS2	J3KMZ7|Q9H0H0	Integrator complex subunit 2 OS=Homo sapiens GN=INTS2 PE=1 SV=1|Integrator complex subunit 2 OS=Homo sapiens GN=INTS2 PE=1 SV=2	0.288918	0.0980985	0.330218	no hit	FALSE
TTYH3	Q9C0H2|Q9C0H2-2|Q9C0H2-3|Q9C0H2-4	Isoform 2 of Protein tweety homolog 3 OS=Homo sapiens GN=TTYH3|Isoform 3 of Protein tweety homolog 3 OS=Homo sapiens GN=TTYH3|Isoform 4 of Protein tweety homolog 3 OS=Homo sapiens GN=TTYH3|Protein tweety homolog 3 OS=Homo sapiens GN=TTYH3 PE=1 SV=3	0.288899	0.0168138	0.130691	no hit	FALSE
USP37	Q86T82|Q86T82-2	Isoform 2 of Ubiquitin carboxyl-terminal hydrolase 37 OS=Homo sapiens GN=USP37|Ubiquitin carboxyl-terminal hydrolase 37 OS=Homo sapiens GN=USP37 PE=1 SV=2	0.288526	0.0493544	0.230158	no hit	FALSE
UBR4	Q5T4S7|Q5T4S7-2|Q5T4S7-3|Q5T4S7-4	E3 ubiquitin-protein ligase UBR4 OS=Homo sapiens GN=UBR4 PE=1 SV=1|Isoform 2 of E3 ubiquitin-protein ligase UBR4 OS=Homo sapiens GN=UBR4|Isoform 3 of E3 ubiquitin-protein ligase UBR4 OS=Homo sapiens GN=UBR4|Isoform 4 of E3 ubiquitin-protein ligase UBR4 OS=Homo sapiens GN=UBR4	0.287891	0.0895095	0.314131	enriched no hit	FALSE
TTC3	P53804|P53804-2|P53804-3	E3 ubiquitin-protein ligase TTC3 OS=Homo sapiens GN=TTC3 PE=1 SV=2|Isoform TPRDII of E3 ubiquitin-protein ligase TTC3 OS=Homo sapiens GN=TTC3|Isoform TPRDIII of E3 ubiquitin-protein ligase TTC3 OS=Homo sapiens GN=TTC3	0.28746	0.0140366	0.119749	enriched no hit	FALSE
AP3M1	Q9Y2T2	AP-3 complex subunit mu-1 OS=Homo sapiens GN=AP3M1 PE=1 SV=1	0.287285	0.065581	0.2657	enriched no hit	FALSE
PIK3CB	P42338	Phosphatidylinositol 4,5-bisphosphate 3-kinase catalytic subunit beta isoform OS=Homo sapiens GN=PIK3CB PE=1 SV=1	0.286784	0.0231613	0.154802	no hit	FALSE
POLR2B	C9J2Y9|P30876	DNA-directed RNA polymerase subunit beta OS=Homo sapiens GN=POLR2B PE=1 SV=2|DNA-directed RNA polymerase II subunit RPB2 OS=Homo sapiens GN=POLR2B PE=1 SV=1	0.286078	0.0139827	0.119749	enriched no hit	FALSE
TYW1	A0A087WUV9|Q9NV66|Q9NV66-2	Isoform 2 of S-adenosyl-L-methionine-dependent tRNA 4-demethylwyosine synthase OS=Homo sapiens GN=TYW1|S-adenosyl-L-methionine-dependent tRNA 4-demethylwyosine synthase OS=Homo sapiens GN=TYW1 PE=1 SV=1|S-adenosyl-L-methionine-dependent tRNA 4-demethylwyosine synthase OS=Homo sapiens GN=TYW1 PE=2 SV=2	0.284924	0.0250598	0.16026	no hit	FALSE
RGPD5	Q99666	RANBP2-like and GRIP domain-containing protein 5/6 OS=Homo sapiens GN=RGPD5 PE=1 SV=3	0.284499	0.10823	0.345409	no hit	FALSE
CTNND1	C9JZR2|O60716|O60716-2|O60716-3|O60716-4|O60716-5|O60716-6|O60716-7|O60716-8	Catenin delta-1 OS=Homo sapiens GN=CTNND1 PE=1 SV=1|Catenin delta-1 OS=Homo sapiens GN=CTNND1 PE=1 SV=2|Isoform 1 of Catenin delta-1 OS=Homo sapiens GN=CTNND1|Isoform 1A of Catenin delta-1 OS=Homo sapiens GN=CTNND1|Isoform 1AB of Catenin delta-1 OS=Homo sapiens GN=CTNND1|Isoform 1AC of Catenin delta-1 OS=Homo sapiens GN=CTNND1|Isoform 1B of Catenin delta-1 OS=Homo sapiens GN=CTNND1|Isoform 1BC of…	0.284427	0.0231231	0.154802	no hit	FALSE
MORC4	Q8TE76|Q8TE76-3	MORC family CW-type zinc finger protein 4 OS=Homo sapiens GN=MORC4 PE=1 SV=2|Isoform 3 of MORC family CW-type zinc finger protein 4 OS=Homo sapiens GN=MORC4	0.283886	0.0255661	0.161936	no hit	FALSE
AHR	P35869	Aryl hydrocarbon receptor OS=Homo sapiens GN=AHR PE=1 SV=2	0.28361	0.0167979	0.130691	no hit	FALSE
WWP2	O00308|O00308-2	Isoform 2 of NEDD4-like E3 ubiquitin-protein ligase WWP2 OS=Homo sapiens GN=WWP2|NEDD4-like E3 ubiquitin-protein ligase WWP2 OS=Homo sapiens GN=WWP2 PE=1 SV=2	0.283345	0.00516072	0.0782311	no hit	FALSE
NFKB2	Q00653|Q00653-4	Nuclear factor NF-kappa-B p100 subunit OS=Homo sapiens GN=NFKB2 PE=1 SV=4|Isoform 4 of Nuclear factor NF-kappa-B p100 subunit OS=Homo sapiens GN=NFKB2	0.283052	0.0464666	0.224899	no hit	FALSE
P4HA2	O15460|O15460-2	Prolyl 4-hydroxylase subunit alpha-2 OS=Homo sapiens GN=P4HA2 PE=1 SV=1|Isoform IIa of Prolyl 4-hydroxylase subunit alpha-2 OS=Homo sapiens GN=P4HA2	0.282552	0.0241724	0.157221	no hit	FALSE
CASP8AP2	A0A087WTW5|Q9UKL3	CASP8-associated protein 2 OS=Homo sapiens GN=CASP8AP2 PE=1 SV=1|CASP8-associated protein 2 OS=Homo sapiens GN=CASP8AP2 PE=1 SV=1	0.282148	0.595484	0.803852	no hit	FALSE
HM13	Q8TCT9|Q8TCT9-2|Q8TCT9-5	Isoform 2 of Minor histocompatibility antigen H13 OS=Homo sapiens GN=HM13|Isoform 5 of Minor histocompatibility antigen H13 OS=Homo sapiens GN=HM13|Minor histocompatibility antigen H13 OS=Homo sapiens GN=HM13 PE=1 SV=1	0.279909	0.352677	0.630811	no hit	FALSE
ADGRL2	B1ALU1|B1ALU3|H0Y5C0|O95490|O95490-2|O95490-5|O95490-6|O95490-7	Adhesion G protein-coupled receptor L2 OS=Homo sapiens GN=ADGRL2 PE=1 SV=1|Adhesion G protein-coupled receptor L2 OS=Homo sapiens GN=ADGRL2 PE=1 SV=1|Adhesion G protein-coupled receptor L2 (Fragment) OS=Homo sapiens GN=ADGRL2 PE=1 SV=1|Adhesion G protein-coupled receptor L2 OS=Homo sapiens GN=ADGRL2 PE=1 SV=2|Isoform 2 of Adhesion G protein-coupled receptor L2 OS=Homo sapiens GN=ADGRL2|Isoform 5 …	0.279887	0.0942006	0.32233	no hit	FALSE
CDK5RAP2	Q96SN8|Q96SN8-2|Q96SN8-3|Q96SN8-4	CDK5 regulatory subunit-associated protein 2 OS=Homo sapiens GN=CDK5RAP2 PE=1 SV=5|Isoform 2 of CDK5 regulatory subunit-associated protein 2 OS=Homo sapiens GN=CDK5RAP2|Isoform 3 of CDK5 regulatory subunit-associated protein 2 OS=Homo sapiens GN=CDK5RAP2|Isoform 4 of CDK5 regulatory subunit-associated protein 2 OS=Homo sapiens GN=CDK5RAP2	0.277978	0.0100239	0.105184	no hit	FALSE
DPP9	M0R2A8|Q86TI2|Q86TI2-2|Q86TI2-4	Dipeptidyl peptidase 9 OS=Homo sapiens GN=DPP9 PE=1 SV=1|Dipeptidyl peptidase 9 OS=Homo sapiens GN=DPP9 PE=1 SV=3|Isoform 2 of Dipeptidyl peptidase 9 OS=Homo sapiens GN=DPP9|Isoform 3 of Dipeptidyl peptidase 9 OS=Homo sapiens GN=DPP9	0.277394	0.0534628	0.237713	enriched no hit	FALSE
HECTD4	J3KPF0	Probable E3 ubiquitin-protein ligase HECTD4 OS=Homo sapiens GN=HECTD4 PE=1 SV=3	0.277275	0.0466839	0.225242	no hit	FALSE
KCTD9	Q7L273	BTB/POZ domain-containing protein KCTD9 OS=Homo sapiens GN=KCTD9 PE=1 SV=1	0.277254	0.0639533	0.262142	no hit	FALSE
IST1	H3BMU1|H3BQF7|H3BUI0|J3KR23|P53990|P53990-2|P53990-3|P53990-4|P53990-5	Isoform 2 of IST1 homolog OS=Homo sapiens GN=IST1|Isoform 3 of IST1 homolog OS=Homo sapiens GN=IST1|Isoform 4 of IST1 homolog OS=Homo sapiens GN=IST1|Isoform 5 of IST1 homolog OS=Homo sapiens GN=IST1|IST1 homolog (Fragment) OS=Homo sapiens GN=IST1 PE=1 SV=1|IST1 homolog OS=Homo sapiens GN=IST1 PE=1 SV=1	0.276913	0.0356231	0.195623	no hit	FALSE
EPN2	E9PBC1|F6PQP6|I3L2B2|O95208|O95208-2	Epsin-2 OS=Homo sapiens GN=EPN2 PE=1 SV=1|Epsin-2 (Fragment) OS=Homo sapiens GN=EPN2 PE=1 SV=7|Epsin-2 OS=Homo sapiens GN=EPN2 PE=1 SV=1|Epsin-2 OS=Homo sapiens GN=EPN2 PE=1 SV=3|Isoform 2 of Epsin-2 OS=Homo sapiens GN=EPN2	0.27639	0.215186	0.499271	no hit	FALSE
GLUL	A0A087WYJ1|P15104	Glutamine synthetase OS=Homo sapiens GN=GLUL PE=1 SV=1|Glutamine synthetase OS=Homo sapiens GN=GLUL PE=1 SV=4	0.275455	0.0212086	0.147709	enriched no hit	FALSE
NEMP1	O14524|O14524-2	Isoform 2 of Nuclear envelope integral membrane protein 1 OS=Homo sapiens GN=NEMP1|Nuclear envelope integral membrane protein 1 OS=Homo sapiens GN=NEMP1 PE=1 SV=2	0.275177	0.0430661	0.217263	no hit	FALSE
BICD2	Q8TD16|Q8TD16-2	Protein bicaudal D homolog 2 OS=Homo sapiens GN=BICD2 PE=1 SV=1|Isoform 2 of Protein bicaudal D homolog 2 OS=Homo sapiens GN=BICD2	0.274817	0.0301183	0.177552	no hit	FALSE
RDH10	Q8IZV5	Retinol dehydrogenase 10 OS=Homo sapiens GN=RDH10 PE=1 SV=1	0.273973	0.0357278	0.195623	no hit	FALSE
TSEN34	A0A024R4N9|A0A0G2JNK5|A9C4B9|B0V3J0|E7EQB3|Q9BSV6	tRNA-splicing endonuclease subunit Sen34 (Fragment) OS=Homo sapiens GN=TSEN34 PE=1 SV=1|tRNA-splicing endonuclease subunit Sen34 (Fragment) OS=Homo sapiens GN=TSEN34 PE=1 SV=2|tRNA-splicing endonuclease subunit Sen34 OS=Homo sapiens GN=TSEN34 PE=1 SV=1|tRNA-splicing endonuclease subunit Sen34 OS=Homo sapiens GN=TSEN34 PE=1 SV=2	0.273698	0.177144	0.449356	no hit	FALSE
CUL3	Q13618|Q13618-2	Cullin-3 OS=Homo sapiens GN=CUL3 PE=1 SV=2|Isoform 2 of Cullin-3 OS=Homo sapiens GN=CUL3	0.272969	0.0703976	0.275294	no hit	FALSE
SMC4	C9JJ64|Q9NTJ3	Structural maintenance of chromosomes protein 4 (Fragment) OS=Homo sapiens GN=SMC4 PE=1 SV=1|Structural maintenance of chromosomes protein 4 OS=Homo sapiens GN=SMC4 PE=1 SV=2	0.272421	0.0138045	0.11936	enriched no hit	FALSE
METTL3	Q86U44	N6-adenosine-methyltransferase 70 kDa subunit OS=Homo sapiens GN=METTL3 PE=1 SV=2	0.271971	0.0521132	0.236656	no hit	FALSE
JAK1	P23458	Tyrosine-protein kinase JAK1 OS=Homo sapiens GN=JAK1 PE=1 SV=2	0.271594	0.0296699	0.175236	no hit	FALSE
TRAF2	Q12933|Q12933-2|Q12933-3|Q12933-4	TNF receptor-associated factor 2 OS=Homo sapiens GN=TRAF2 PE=1 SV=2|Isoform 2 of TNF receptor-associated factor 2 OS=Homo sapiens GN=TRAF2|Isoform 3 of TNF receptor-associated factor 2 OS=Homo sapiens GN=TRAF2|Isoform 4 of TNF receptor-associated factor 2 OS=Homo sapiens GN=TRAF2	0.271436	0.0973356	0.329122	no hit	FALSE
VPS72	Q15906|Q15906-2	Vacuolar protein sorting-associated protein 72 homolog OS=Homo sapiens GN=VPS72 PE=1 SV=1|Isoform 2 of Vacuolar protein sorting-associated protein 72 homolog OS=Homo sapiens GN=VPS72	0.271125	0.0547921	0.241576	no hit	FALSE
PSME3	B3KQ25|K7ESG5|K9J957|P61289|P61289-2|P61289-3	Isoform 2 of Proteasome activator complex subunit 3 OS=Homo sapiens GN=PSME3|Isoform 3 of Proteasome activator complex subunit 3 OS=Homo sapiens GN=PSME3|Proteasome activator complex subunit 3 OS=Homo sapiens GN=PSME3 PE=1 SV=1	0.271088	0.351874	0.630091	no hit	FALSE
DNAJB6	A0A0J9YX62|O75190|O75190-2|O75190-3	DnaJ homolog subfamily B member 6 OS=Homo sapiens GN=DNAJB6 PE=1 SV=1|DnaJ homolog subfamily B member 6 OS=Homo sapiens GN=DNAJB6 PE=1 SV=2|Isoform B of DnaJ homolog subfamily B member 6 OS=Homo sapiens GN=DNAJB6|Isoform C of DnaJ homolog subfamily B member 6 OS=Homo sapiens GN=DNAJB6	0.271075	0.0131452	0.116239	no hit	FALSE
TP53BP2	Q13625|Q13625-2|Q13625-3	Apoptosis-stimulating of p53 protein 2 OS=Homo sapiens GN=TP53BP2 PE=1 SV=2|Isoform 2 of Apoptosis-stimulating of p53 protein 2 OS=Homo sapiens GN=TP53BP2|Isoform 3 of Apoptosis-stimulating of p53 protein 2 OS=Homo sapiens GN=TP53BP2	0.269299	0.0159899	0.129067	no hit	FALSE
ECT2	Q9H8V3|Q9H8V3-2|Q9H8V3-3|Q9H8V3-4	Protein ECT2 OS=Homo sapiens GN=ECT2 PE=1 SV=4|Isoform 2 of Protein ECT2 OS=Homo sapiens GN=ECT2|Isoform 3 of Protein ECT2 OS=Homo sapiens GN=ECT2|Isoform 4 of Protein ECT2 OS=Homo sapiens GN=ECT2	0.268863	0.0486855	0.228383	no hit	FALSE
KIF23	H7BYN4|Q02241|Q02241-2|Q02241-3	Isoform 2 of Kinesin-like protein KIF23 OS=Homo sapiens GN=KIF23|Isoform 3 of Kinesin-like protein KIF23 OS=Homo sapiens GN=KIF23|Kinesin-like protein KIF23 OS=Homo sapiens GN=KIF23 PE=1 SV=3|Kinesin-like protein OS=Homo sapiens GN=KIF23 PE=1 SV=1	0.268304	0.0213952	0.148353	no hit	FALSE
HSPA8	E9PN89|P11142	Heat shock cognate 71 kDa protein (Fragment) OS=Homo sapiens GN=HSPA8 PE=1 SV=1|Heat shock cognate 71 kDa protein OS=Homo sapiens GN=HSPA8 PE=1 SV=1	0.268088	0.0664227	0.267048	no hit	FALSE
KIFC1	Q9BW19	Kinesin-like protein KIFC1 OS=Homo sapiens GN=KIFC1 PE=1 SV=2	0.267752	0.0434211	0.218703	no hit	FALSE
CLCC1	Q96S66|Q96S66-2	Chloride channel CLIC-like protein 1 OS=Homo sapiens GN=CLCC1 PE=1 SV=1|Isoform 2 of Chloride channel CLIC-like protein 1 OS=Homo sapiens GN=CLCC1	0.266291	0.0977699	0.329719	no hit	FALSE
NSFL1C	Q9UNZ2|Q9UNZ2-5	NSFL1 cofactor p47 OS=Homo sapiens GN=NSFL1C PE=1 SV=2|Isoform 3 of NSFL1 cofactor p47 OS=Homo sapiens GN=NSFL1C	0.26599	0.126934	0.378039	no hit	FALSE
PIK3R3	F6TDL0|Q92569|Q92569-2|Q92569-3	Isoform 2 of Phosphatidylinositol 3-kinase regulatory subunit gamma OS=Homo sapiens GN=PIK3R3|Isoform 3 of Phosphatidylinositol 3-kinase regulatory subunit gamma OS=Homo sapiens GN=PIK3R3|Phosphatidylinositol 3-kinase regulatory subunit gamma OS=Homo sapiens GN=PIK3R3 PE=1 SV=1|Phosphatidylinositol 3-kinase regulatory subunit gamma OS=Homo sapiens GN=PIK3R3 PE=1 SV=2	0.265905	0.0548736	0.241597	no hit	FALSE
PSMB3	P49720	Proteasome subunit beta type-3 OS=Homo sapiens GN=PSMB3 PE=1 SV=2	0.265776	0.377493	0.645141	no hit	FALSE
RNF40	H3BP71|O75150	E3 ubiquitin-protein ligase BRE1B OS=Homo sapiens GN=RNF40 PE=1 SV=2|E3 ubiquitin-protein ligase BRE1B OS=Homo sapiens GN=RNF40 PE=1 SV=4	0.264862	0.0382821	0.202121	no hit	FALSE
SLC7A11	Q9UPY5	Cystine/glutamate transporter OS=Homo sapiens GN=SLC7A11 PE=1 SV=1	0.264813	0.178561	0.451493	no hit	FALSE
PSMC3	E9PM69|P17980|R4GNH3	26S protease regulatory subunit 6A OS=Homo sapiens GN=PSMC3 PE=1 SV=1|26S protease regulatory subunit 6A OS=Homo sapiens GN=PSMC3 PE=1 SV=3	0.264556	0.305526	0.588991	no hit	FALSE
RNF8	O76064|O76064-3	E3 ubiquitin-protein ligase RNF8 OS=Homo sapiens GN=RNF8 PE=1 SV=1|Isoform 3 of E3 ubiquitin-protein ligase RNF8 OS=Homo sapiens GN=RNF8	0.264147	0.0608465	0.253031	no hit	FALSE
PSMA1	P25786|P25786-2	Proteasome subunit alpha type-1 OS=Homo sapiens GN=PSMA1 PE=1 SV=1|Isoform Long of Proteasome subunit alpha type-1 OS=Homo sapiens GN=PSMA1	0.263972	0.358275	0.634692	no hit	FALSE
RAB7A	P51149	Ras-related protein Rab-7a OS=Homo sapiens GN=RAB7A PE=1 SV=1	0.263743	0.0736004	0.282042	no hit	FALSE
HLA-DQB1	A0A140T8Z1|Q5SU54|Q5Y7D6	HLA class II histocompatibility antigen, DQ beta 1 chain OS=Homo sapiens GN=HLA-DQB1 PE=1 SV=1	0.262457	0.0448098	0.221984	no hit	FALSE
PTGES3	A0A087WYT3|B4DDC6|Q15185|Q15185-2|Q15185-3|Q15185-4	Isoform 2 of Prostaglandin E synthase 3 OS=Homo sapiens GN=PTGES3|Isoform 3 of Prostaglandin E synthase 3 OS=Homo sapiens GN=PTGES3|Isoform 4 of Prostaglandin E synthase 3 OS=Homo sapiens GN=PTGES3|Prostaglandin E synthase 3 OS=Homo sapiens GN=PTGES3 PE=1 SV=1	0.262229	0.362116	0.63641	no hit	FALSE
USP3	H0YKU8|H0YLB7|H0YMI4|Q6JHV3|Q9Y6I4|Q9Y6I4-2	Isoform 2 of Ubiquitin carboxyl-terminal hydrolase 3 OS=Homo sapiens GN=USP3|Ubiquitin carboxyl-terminal hydrolase 3 (Fragment) OS=Homo sapiens GN=USP3 PE=1 SV=1|Ubiquitin carboxyl-terminal hydrolase 3 OS=Homo sapiens GN=USP3 PE=1 SV=1|Ubiquitin carboxyl-terminal hydrolase 3 OS=Homo sapiens GN=USP3 PE=1 SV=2|UBP protein OS=Homo sapiens GN=USP3 PE=1 SV=1	0.261128	0.0220445	0.150208	no hit	FALSE
NEIL3	Q8TAT5	Endonuclease 8-like 3 OS=Homo sapiens GN=NEIL3 PE=1 SV=3	0.260528	0.215968	0.500269	no hit	FALSE
TRMT1	Q9NXH9|Q9NXH9-2	tRNA (guanine(26)-N(2))-dimethyltransferase OS=Homo sapiens GN=TRMT1 PE=1 SV=1|Isoform 2 of tRNA (guanine(26)-N(2))-dimethyltransferase OS=Homo sapiens GN=TRMT1	0.26005	0.025722	0.161953	no hit	FALSE
ATP2C1	B4E2Q0|H0Y9V7|P98194|P98194-2|P98194-3|P98194-4|P98194-5|P98194-6|P98194-7|P98194-8|P98194-9	Calcium-transporting ATPase OS=Homo sapiens GN=ATP2C1 PE=1 SV=1|Calcium-transporting ATPase type 2C member 1 (Fragment) OS=Homo sapiens GN=ATP2C1 PE=1 SV=1|Calcium-transporting ATPase type 2C member 1 OS=Homo sapiens GN=ATP2C1 PE=1 SV=3|Isoform 2 of Calcium-transporting ATPase type 2C member 1 OS=Homo sapiens GN=ATP2C1|Isoform 3 of Calcium-transporting ATPase type 2C member 1 OS=Homo sapiens GN=A…	0.25986	0.0508158	0.234526	no hit	FALSE
PCNX3	Q9H6A9	Pecanex-like protein 3 OS=Homo sapiens GN=PCNX3 PE=1 SV=2	0.259575	0.121471	0.36946	no hit	FALSE
APP	A0A0A0MRG2|E9PG40|H7C0V9|P05067|P05067-10|P05067-11|P05067-3|P05067-4|P05067-5|P05067-6|P05067-7|P05067-8|P05067-9	Amyloid beta A4 protein (Fragment) OS=Homo sapiens GN=APP PE=1 SV=1|Amyloid beta A4 protein OS=Homo sapiens GN=APP PE=1 SV=1|Amyloid beta A4 protein OS=Homo sapiens GN=APP PE=1 SV=3|Isoform 11 of Amyloid beta A4 protein OS=Homo sapiens GN=APP|Isoform APP639 of Amyloid beta A4 protein OS=Homo sapiens GN=APP|Isoform APP695 of Amyloid beta A4 protein OS=Homo sapiens GN=APP|Isoform APP714 of Amyloid …	0.258426	0.0353314	0.194787	no hit	FALSE
IQGAP2	E7EWC2|F5H7S7|Q13576|Q13576-2|Q13576-3	Isoform 2 of Ras GTPase-activating-like protein IQGAP2 OS=Homo sapiens GN=IQGAP2|Isoform 3 of Ras GTPase-activating-like protein IQGAP2 OS=Homo sapiens GN=IQGAP2|Ras GTPase-activating-like protein IQGAP2 (Fragment) OS=Homo sapiens GN=IQGAP2 PE=1 SV=1|Ras GTPase-activating-like protein IQGAP2 OS=Homo sapiens GN=IQGAP2 PE=1 SV=2|Ras GTPase-activating-like protein IQGAP2 OS=Homo sapiens GN=IQGAP2 PE…	0.257935	0.0723957	0.278949	no hit	FALSE
EXT2	Q93063|Q93063-2|Q93063-3	Exostosin-2 OS=Homo sapiens GN=EXT2 PE=1 SV=1|Isoform 2 of Exostosin-2 OS=Homo sapiens GN=EXT2|Isoform 3 of Exostosin-2 OS=Homo sapiens GN=EXT2	0.257599	0.0179849	0.136059	no hit	FALSE
AMBRA1	A0A075B6T1|Q9C0C7|Q9C0C7-2|Q9C0C7-3|Q9C0C7-4|Q9C0C7-5	Activating molecule in BECN1-regulated autophagy protein 1 OS=Homo sapiens GN=AMBRA1 PE=1 SV=1|Activating molecule in BECN1-regulated autophagy protein 1 OS=Homo sapiens GN=AMBRA1 PE=1 SV=2|Isoform 2 of Activating molecule in BECN1-regulated autophagy protein 1 OS=Homo sapiens GN=AMBRA1|Isoform 3 of Activating molecule in BECN1-regulated autophagy protein 1 OS=Homo sapiens GN=AMBRA1|Isoform 4 of …	0.257363	0.0152297	0.125835	no hit	FALSE
CYP51A1	A0A0C4DFL7|Q16850	Lanosterol 14-alpha demethylase OS=Homo sapiens GN=CYP51A1 PE=1 SV=1|Lanosterol 14-alpha demethylase OS=Homo sapiens GN=CYP51A1 PE=1 SV=3	0.257295	0.0655104	0.2657	no hit	FALSE
USP33	Q8TEY7|Q8TEY7-2|Q8TEY7-3	Isoform 2 of Ubiquitin carboxyl-terminal hydrolase 33 OS=Homo sapiens GN=USP33|Isoform 3 of Ubiquitin carboxyl-terminal hydrolase 33 OS=Homo sapiens GN=USP33|Ubiquitin carboxyl-terminal hydrolase 33 OS=Homo sapiens GN=USP33 PE=1 SV=2	0.257216	0.066239	0.26665	no hit	FALSE
TRPC4AP	Q8TEL6|Q8TEL6-3	Short transient receptor potential channel 4-associated protein OS=Homo sapiens GN=TRPC4AP PE=1 SV=2|Isoform 3 of Short transient receptor potential channel 4-associated protein OS=Homo sapiens GN=TRPC4AP	0.256402	0.0411566	0.211466	enriched no hit	FALSE
CCDC18	E9PFB9|J3KP97|Q5T9S5|Q5T9S5-2	Coiled-coil domain-containing protein 18 OS=Homo sapiens GN=CCDC18 PE=1 SV=2|Coiled-coil domain-containing protein 18 (Fragment) OS=Homo sapiens GN=CCDC18 PE=1 SV=1|Coiled-coil domain-containing protein 18 OS=Homo sapiens GN=CCDC18 PE=1 SV=1|Isoform 2 of Coiled-coil domain-containing protein 18 OS=Homo sapiens GN=CCDC18	0.256298	0.0395523	0.206485	no hit	FALSE
TP53	A0A087WZU8|A0A0U1RQC9|P04637|P04637-4	Cellular tumor antigen p53 OS=Homo sapiens GN=TP53 PE=1 SV=1|Cellular tumor antigen p53 OS=Homo sapiens GN=TP53 PE=1 SV=4|Isoform 4 of Cellular tumor antigen p53 OS=Homo sapiens GN=TP53	0.256176	0.0249461	0.16026	no hit	FALSE
CHUK	O15111	Inhibitor of nuclear factor kappa-B kinase subunit alpha OS=Homo sapiens GN=CHUK PE=1 SV=2	0.255545	0.0120384	0.112125	no hit	FALSE
MED6	A0A087WYL7|G3V4A5|O75586|O75586-2	Mediator of RNA polymerase II transcription subunit 6 OS=Homo sapiens GN=MED6 PE=1 SV=1|Mediator of RNA polymerase II transcription subunit 6 OS=Homo sapiens GN=MED6 PE=1 SV=1|Mediator of RNA polymerase II transcription subunit 6 OS=Homo sapiens GN=MED6 PE=1 SV=2|Isoform 2 of Mediator of RNA polymerase II transcription subunit 6 OS=Homo sapiens GN=MED6	0.255513	0.197189	0.474217	no hit	FALSE
KDM5A	F5H1F7|P29375|P29375-2	Lysine-specific demethylase 5A OS=Homo sapiens GN=KDM5A PE=1 SV=2|Lysine-specific demethylase 5A OS=Homo sapiens GN=KDM5A PE=1 SV=3|Isoform 2 of Lysine-specific demethylase 5A OS=Homo sapiens GN=KDM5A	0.255413	0.0163347	0.129595	no hit	FALSE
FBXO5	Q9UKT4|Q9UKT4-2	F-box only protein 5 OS=Homo sapiens GN=FBXO5 PE=1 SV=1|Isoform 2 of F-box only protein 5 OS=Homo sapiens GN=FBXO5	0.254799	0.113058	0.354488	no hit	FALSE
IGF1R	C9J5X1|P08069	Tyrosine-protein kinase receptor OS=Homo sapiens GN=IGF1R PE=1 SV=1|Insulin-like growth factor 1 receptor OS=Homo sapiens GN=IGF1R PE=1 SV=1	0.253204	0.0290871	0.17405	no hit	FALSE
LPCAT2	Q7L5N7	Lysophosphatidylcholine acyltransferase 2 OS=Homo sapiens GN=LPCAT2 PE=1 SV=1	0.252026	0.00950036	0.102422	no hit	FALSE
INF2	A0A0A0MQU1|Q27J81|Q27J81-2	Inverted formin-2 (Fragment) OS=Homo sapiens GN=INF2 PE=1 SV=1|Inverted formin-2 OS=Homo sapiens GN=INF2 PE=1 SV=2|Isoform 2 of Inverted formin-2 OS=Homo sapiens GN=INF2	0.25195	0.256038	0.540945	no hit	FALSE
IFFO1	A0A087WZ16|F8W8H2|Q0D2I5|Q0D2I5-3|Q0D2I5-4|Q0D2I5-5|Q0D2I5-7	Intermediate filament family orphan 1 OS=Homo sapiens GN=IFFO1 PE=1 SV=1|Intermediate filament family orphan 1 OS=Homo sapiens GN=IFFO1 PE=2 SV=2|Isoform 3 of Intermediate filament family orphan 1 OS=Homo sapiens GN=IFFO1|Isoform 4 of Intermediate filament family orphan 1 OS=Homo sapiens GN=IFFO1|Isoform 5 of Intermediate filament family orphan 1 OS=Homo sapiens GN=IFFO1|Isoform 7 of Intermediate…	0.251794	0.13634	0.394373	no hit	FALSE
FAM175B	Q15018	BRISC complex subunit Abro1 OS=Homo sapiens GN=FAM175B PE=1 SV=2	0.251527	0.0234501	0.15563	no hit	FALSE
UBE2O	K7ES11|Q9C0C9	(E3-independent) E2 ubiquitin-conjugating enzyme (Fragment) OS=Homo sapiens GN=UBE2O PE=1 SV=1|(E3-independent) E2 ubiquitin-conjugating enzyme OS=Homo sapiens GN=UBE2O PE=1 SV=3	0.251284	0.213549	0.498334	no hit	FALSE
FBXL3	C9J0Y7|Q9UKT7	F-box/LRR-repeat protein 3 (Fragment) OS=Homo sapiens GN=FBXL3 PE=1 SV=1|F-box/LRR-repeat protein 3 OS=Homo sapiens GN=FBXL3 PE=1 SV=1	0.250793	0.0921533	0.318091	no hit	FALSE
TTC21B	Q7Z4L5	Tetratricopeptide repeat protein 21B OS=Homo sapiens GN=TTC21B PE=1 SV=2	0.250376	0.0338881	0.19016	no hit	FALSE
MSANTD4	E9PLV2|Q8NCY6	Myb/SANT-like DNA-binding domain-containing protein 4 (Fragment) OS=Homo sapiens GN=MSANTD4 PE=1 SV=1|Myb/SANT-like DNA-binding domain-containing protein 4 OS=Homo sapiens GN=MSANTD4 PE=1 SV=1	0.250174	0.139232	0.398456	no hit	FALSE
ASCC2	Q9H1I8|Q9H1I8-3	Activating signal cointegrator 1 complex subunit 2 OS=Homo sapiens GN=ASCC2 PE=1 SV=3|Isoform 3 of Activating signal cointegrator 1 complex subunit 2 OS=Homo sapiens GN=ASCC2	0.250071	0.0638495	0.262058	no hit	FALSE
DGKH	A0A0D9SFR6|Q86XP1|Q86XP1-2|Q86XP1-3|Q86XP1-5	Diacylglycerol kinase OS=Homo sapiens GN=DGKH PE=1 SV=1|Diacylglycerol kinase eta OS=Homo sapiens GN=DGKH PE=1 SV=1|Isoform 2 of Diacylglycerol kinase eta OS=Homo sapiens GN=DGKH|Isoform 3 of Diacylglycerol kinase eta OS=Homo sapiens GN=DGKH|Isoform 4 of Diacylglycerol kinase eta OS=Homo sapiens GN=DGKH	0.249815	0.166281	0.438097	no hit	FALSE
ACTR2	P61160	Actin-related protein 2 OS=Homo sapiens GN=ACTR2 PE=1 SV=1	0.249705	0.0589699	0.250185	enriched no hit	FALSE
CEP295	Q9C0D2|Q9C0D2-3	Centrosomal protein of 295 kDa OS=Homo sapiens GN=CEP295 PE=1 SV=4|Isoform 3 of Centrosomal protein of 295 kDa OS=Homo sapiens GN=CEP295	0.248451	0.114598	0.356854	no hit	FALSE
SRP54	G3V4F7|P61011|P61011-2	Isoform 2 of Signal recognition particle 54 kDa protein OS=Homo sapiens GN=SRP54|Signal recognition particle 54 kDa protein OS=Homo sapiens GN=SRP54 PE=1 SV=1	0.247095	0.0308565	0.180551	no hit	FALSE
PCNT	O95613|O95613-2	Pericentrin OS=Homo sapiens GN=PCNT PE=1 SV=4|Isoform 2 of Pericentrin OS=Homo sapiens GN=PCNT	0.246749	0.0350962	0.193829	no hit	FALSE
PSMB6	P28072	Proteasome subunit beta type-6 OS=Homo sapiens GN=PSMB6 PE=1 SV=4	0.246624	0.239193	0.524725	no hit	FALSE
FLNA	P21333|P21333-2|Q5HY54	Filamin-A OS=Homo sapiens GN=FLNA PE=1 SV=1|Filamin-A OS=Homo sapiens GN=FLNA PE=1 SV=4|Isoform 2 of Filamin-A OS=Homo sapiens GN=FLNA	0.246468	0.0484253	0.228116	no hit	FALSE
NSMCE4A	Q9NXX6	Non-structural maintenance of chromosomes element 4 homolog A OS=Homo sapiens GN=NSMCE4A PE=1 SV=2	0.246399	0.137267	0.394523	no hit	FALSE
TONSL	A0A087X1F6|Q96HA7|Q96HA7-2	Isoform 2 of Tonsoku-like protein OS=Homo sapiens GN=TONSL|Tonsoku-like protein OS=Homo sapiens GN=TONSL PE=1 SV=1|Tonsoku-like protein OS=Homo sapiens GN=TONSL PE=1 SV=2	0.245708	0.108297	0.345409	no hit	FALSE
KIAA0922	A2VDJ0|A2VDJ0-2|A2VDJ0-3|A2VDJ0-5|A2VDJ0-6|H0Y2M0	Isoform 2 of Transmembrane protein 131-like OS=Homo sapiens GN=KIAA0922|Isoform 3 of Transmembrane protein 131-like OS=Homo sapiens GN=KIAA0922|Isoform 4 of Transmembrane protein 131-like OS=Homo sapiens GN=KIAA0922|Isoform 5 of Transmembrane protein 131-like OS=Homo sapiens GN=KIAA0922|Transmembrane protein 131-like (Fragment) OS=Homo sapiens GN=KIAA0922 PE=1 SV=1|Transmembrane protein 131-like …	0.245604	0.0553641	0.242738	no hit	FALSE
MED14	O60244	Mediator of RNA polymerase II transcription subunit 14 OS=Homo sapiens GN=MED14 PE=1 SV=2	0.245094	0.190813	0.46914	no hit	FALSE
SNX5	A0A087WUY5|Q9Y5X3	Sorting nexin-5 (Fragment) OS=Homo sapiens GN=SNX5 PE=1 SV=1|Sorting nexin-5 OS=Homo sapiens GN=SNX5 PE=1 SV=1	0.244722	0.0572732	0.248526	no hit	FALSE
TPR	P12270	Nucleoprotein TPR OS=Homo sapiens GN=TPR PE=1 SV=3	0.243926	0.086277	0.306873	no hit	FALSE
SLF1	Q9BQI6	SMC5-SMC6 complex localization factor protein 1 OS=Homo sapiens GN=SLF1 PE=1 SV=2	0.24377	0.108217	0.345409	enriched no hit	FALSE
DMXL1	F5H269|Q9Y485	DmX-like protein 1 OS=Homo sapiens GN=DMXL1 PE=1 SV=1|DmX-like protein 1 OS=Homo sapiens GN=DMXL1 PE=1 SV=3	0.243212	0.0237166	0.155837	no hit	FALSE
PSME4	Q14997	Proteasome activator complex subunit 4 OS=Homo sapiens GN=PSME4 PE=1 SV=2	0.243206	0.467859	0.719502	no hit	FALSE
OGFOD1	A0A0A0MTR2|H3BR79|H3BUA6|Q8N543	Prolyl 3-hydroxylase OGFOD1 (Fragment) OS=Homo sapiens GN=OGFOD1 PE=1 SV=1|Prolyl 3-hydroxylase OGFOD1 OS=Homo sapiens GN=OGFOD1 PE=1 SV=1	0.24284	0.0420773	0.214964	no hit	FALSE
NUDT21	H3BND3|H3BV41|O43809	Cleavage and polyadenylation-specificity factor subunit 5 (Fragment) OS=Homo sapiens GN=NUDT21 PE=1 SV=1|Cleavage and polyadenylation-specificity factor subunit 5 (Fragment) OS=Homo sapiens GN=NUDT21 PE=1 SV=7|Cleavage and polyadenylation specificity factor subunit 5 OS=Homo sapiens GN=NUDT21 PE=1 SV=1	0.242481	0.168449	0.44025	no hit	FALSE
ODF2	Q5BJF6|Q5BJF6-10|Q5BJF6-2|Q5BJF6-3|Q5BJF6-4|Q5BJF6-5|Q5BJF6-6|Q5BJF6-7|Q5BJF6-8|Q5BJF6-9	Isoform 10 of Outer dense fiber protein 2 OS=Homo sapiens GN=ODF2|Isoform 2 of Outer dense fiber protein 2 OS=Homo sapiens GN=ODF2|Isoform 3 of Outer dense fiber protein 2 OS=Homo sapiens GN=ODF2|Isoform 4 of Outer dense fiber protein 2 OS=Homo sapiens GN=ODF2|Isoform 5 of Outer dense fiber protein 2 OS=Homo sapiens GN=ODF2|Isoform 6 of Outer dense fiber protein 2 OS=Homo sapiens GN=ODF2|Isoform …	0.241932	0.0105236	0.108262	no hit	FALSE
SREBF1	B5MD58|P36956|P36956-4	Sterol regulatory element-binding protein 1 OS=Homo sapiens GN=SREBF1 PE=1 SV=1|Sterol regulatory element-binding protein 1 OS=Homo sapiens GN=SREBF1 PE=1 SV=2|Isoform 4 of Sterol regulatory element-binding protein 1 OS=Homo sapiens GN=SREBF1	0.241634	0.11326	0.35477	no hit	FALSE
IMPDH1	C9J381|P20839|P20839-2|P20839-3|P20839-4|P20839-5|P20839-6|P20839-7	Inosine-5'-monophosphate dehydrogenase OS=Homo sapiens GN=IMPDH1 PE=1 SV=1|Inosine-5'-monophosphate dehydrogenase 1 OS=Homo sapiens GN=IMPDH1 PE=1 SV=2|Isoform 2 of Inosine-5'-monophosphate dehydrogenase 1 OS=Homo sapiens GN=IMPDH1|Isoform 3 of Inosine-5'-monophosphate dehydrogenase 1 OS=Homo sapiens GN=IMPDH1|Isoform 4 of Inosine-5'-monophosphate dehydrogenase 1 OS=Homo sapiens GN=IMPDH1|Isoform…	0.241113	0.0317766	0.183545	no hit	FALSE
ZMYM1	Q5SVZ6	Zinc finger MYM-type protein 1 OS=Homo sapiens GN=ZMYM1 PE=1 SV=1	0.240918	0.0284314	0.172784	no hit	FALSE
TFAP4	Q01664	Transcription factor AP-4 OS=Homo sapiens GN=TFAP4 PE=1 SV=2	0.240051	0.0908416	0.316688	no hit	FALSE
EHMT2	A0A0G2JIR1|A0A0G2JIS2|A0A0G2JK64|A2ABF8|A2ABF9|Q96KQ7|Q96KQ7-2	Histone-lysine N-methyltransferase EHMT2 OS=Homo sapiens GN=EHMT2 PE=1 SV=1|Histone-lysine N-methyltransferase EHMT2 OS=Homo sapiens GN=EHMT2 PE=1 SV=1|Histone-lysine N-methyltransferase EHMT2 OS=Homo sapiens GN=EHMT2 PE=1 SV=1|Histone-lysine N-methyltransferase EHMT2 OS=Homo sapiens GN=EHMT2 PE=1 SV=1|Histone-lysine N-methyltransferase EHMT2 OS=Homo sapiens GN=EHMT2 PE=1 SV=1|Histone-lysine N-me…	0.239829	0.0331423	0.187647	no hit	FALSE
BCOR	Q6W2J9|Q6W2J9-2|Q6W2J9-4	BCL-6 corepressor OS=Homo sapiens GN=BCOR PE=1 SV=1|Isoform 2 of BCL-6 corepressor OS=Homo sapiens GN=BCOR|Isoform 4 of BCL-6 corepressor OS=Homo sapiens GN=BCOR	0.239695	0.145466	0.407771	no hit	FALSE
BAG2	O95816|O95816-2	BAG family molecular chaperone regulator 2 OS=Homo sapiens GN=BAG2 PE=1 SV=1|Isoform 2 of BAG family molecular chaperone regulator 2 OS=Homo sapiens GN=BAG2	0.239641	0.113576	0.355156	no hit	FALSE
MSN	P26038	Moesin OS=Homo sapiens GN=MSN PE=1 SV=3	0.239575	0.0790928	0.291361	no hit	FALSE
SGPL1	O95470	Sphingosine-1-phosphate lyase 1 OS=Homo sapiens GN=SGPL1 PE=1 SV=3	0.239277	0.0594303	0.250301	no hit	FALSE
PIK3R1	P27986|P27986-4	Phosphatidylinositol 3-kinase regulatory subunit alpha OS=Homo sapiens GN=PIK3R1 PE=1 SV=2|Isoform 4 of Phosphatidylinositol 3-kinase regulatory subunit alpha OS=Homo sapiens GN=PIK3R1	0.239191	0.0336033	0.189576	no hit	FALSE
VPS11	A0A087WXL6|B7Z879|Q9H270	Vacuolar protein sorting-associated protein 11 homolog OS=Homo sapiens GN=VPS11 PE=1 SV=1|Vacuolar protein sorting 11 (Yeast), isoform CRA_a OS=Homo sapiens GN=VPS11 PE=1 SV=1	0.238874	0.0473178	0.225423	enriched no hit	FALSE
ERGIC3	H0Y5K5|H0Y621|Q9Y282|Q9Y282-3	Endoplasmic reticulum-Golgi intermediate compartment protein 3 (Fragment) OS=Homo sapiens GN=ERGIC3 PE=1 SV=1|Endoplasmic reticulum-Golgi intermediate compartment protein 3 (Fragment) OS=Homo sapiens GN=ERGIC3 PE=1 SV=1|Endoplasmic reticulum-Golgi intermediate compartment protein 3 OS=Homo sapiens GN=ERGIC3 PE=1 SV=1|Isoform 3 of Endoplasmic reticulum-Golgi intermediate compartment protein 3 OS=H…	0.237318	0.0168679	0.130788	no hit	FALSE
RNF123	Q5XPI4|Q5XPI4-2	E3 ubiquitin-protein ligase RNF123 OS=Homo sapiens GN=RNF123 PE=1 SV=1|Isoform 2 of E3 ubiquitin-protein ligase RNF123 OS=Homo sapiens GN=RNF123	0.237128	0.0508836	0.234526	no hit	FALSE
NAA50	C9J5D1|E7EQ69|Q9GZZ1	N-alpha-acetyltransferase 50 OS=Homo sapiens GN=NAA50 PE=1 SV=1	0.236794	0.127954	0.378999	no hit	FALSE
VPS41	P49754|P49754-2|P49754-3	Vacuolar protein sorting-associated protein 41 homolog OS=Homo sapiens GN=VPS41 PE=1 SV=3|Isoform 2 of Vacuolar protein sorting-associated protein 41 homolog OS=Homo sapiens GN=VPS41|Isoform 3 of Vacuolar protein sorting-associated protein 41 homolog OS=Homo sapiens GN=VPS41	0.236199	0.054288	0.240422	enriched no hit	FALSE
ZCCHC12	Q6PEW1	Zinc finger CCHC domain-containing protein 12 OS=Homo sapiens GN=ZCCHC12 PE=1 SV=2	0.234984	0.0815268	0.296701	no hit	FALSE
MED12	Q93074|Q93074-2|Q93074-3	Mediator of RNA polymerase II transcription subunit 12 OS=Homo sapiens GN=MED12 PE=1 SV=4|Isoform 2 of Mediator of RNA polymerase II transcription subunit 12 OS=Homo sapiens GN=MED12|Isoform 3 of Mediator of RNA polymerase II transcription subunit 12 OS=Homo sapiens GN=MED12	0.234931	0.0999346	0.332552	no hit	FALSE
SLC12A2	P55011|P55011-3	Isoform 2 of Solute carrier family 12 member 2 OS=Homo sapiens GN=SLC12A2|Solute carrier family 12 member 2 OS=Homo sapiens GN=SLC12A2 PE=1 SV=1	0.234638	0.186929	0.462619	no hit	FALSE
C2CD5	Q86YS7|Q86YS7-2|Q86YS7-3|Q86YS7-4	C2 domain-containing protein 5 OS=Homo sapiens GN=C2CD5 PE=1 SV=1|Isoform 2 of C2 domain-containing protein 5 OS=Homo sapiens GN=C2CD5|Isoform 3 of C2 domain-containing protein 5 OS=Homo sapiens GN=C2CD5|Isoform 4 of C2 domain-containing protein 5 OS=Homo sapiens GN=C2CD5	0.234332	0.0321025	0.184283	no hit	FALSE
CDK5RAP3	Q96JB5|Q96JB5-2|Q96JB5-4	CDK5 regulatory subunit-associated protein 3 OS=Homo sapiens GN=CDK5RAP3 PE=1 SV=2|Isoform 2 of CDK5 regulatory subunit-associated protein 3 OS=Homo sapiens GN=CDK5RAP3|Isoform 4 of CDK5 regulatory subunit-associated protein 3 OS=Homo sapiens GN=CDK5RAP3	0.233932	0.0462332	0.224899	no hit	FALSE
PML	H3BT29|H3BT57|H3BUJ5|H3BVD2|P29590|P29590-10|P29590-11|P29590-12|P29590-13|P29590-14|P29590-2|P29590-3|P29590-4|P29590-5|P29590-8|P29590-9	Isoform PML-11 of Protein PML OS=Homo sapiens GN=PML|Isoform PML-12 of Protein PML OS=Homo sapiens GN=PML|Isoform PML-13 of Protein PML OS=Homo sapiens GN=PML|Isoform PML-14 of Protein PML OS=Homo sapiens GN=PML|Isoform PML-2 of Protein PML OS=Homo sapiens GN=PML|Isoform PML-3 of Protein PML OS=Homo sapiens GN=PML|Isoform PML-4 of Protein PML OS=Homo sapiens GN=PML|Isoform PML-5 of Protein PML OS…	0.233907	0.078105	0.291361	no hit	FALSE
COPA	P53621|P53621-2	Coatomer subunit alpha OS=Homo sapiens GN=COPA PE=1 SV=2|Isoform 2 of Coatomer subunit alpha OS=Homo sapiens GN=COPA	0.233601	0.0123899	0.113133	no hit	FALSE
LZTS2	Q9BRK4	Leucine zipper putative tumor suppressor 2 OS=Homo sapiens GN=LZTS2 PE=1 SV=2	0.232861	0.116506	0.361341	no hit	FALSE
USP48	Q86UV5|Q86UV5-2	Isoform 2 of Ubiquitin carboxyl-terminal hydrolase 48 OS=Homo sapiens GN=USP48|Ubiquitin carboxyl-terminal hydrolase 48 OS=Homo sapiens GN=USP48 PE=1 SV=1	0.232792	0.0464492	0.224899	no hit	FALSE
VPS36	Q86VN1|Q86VN1-2	Isoform 2 of Vacuolar protein-sorting-associated protein 36 OS=Homo sapiens GN=VPS36|Vacuolar protein-sorting-associated protein 36 OS=Homo sapiens GN=VPS36 PE=1 SV=1	0.231338	0.0991226	0.331594	no hit	FALSE
SLC19A1	P41440	Folate transporter 1 OS=Homo sapiens GN=SLC19A1 PE=1 SV=3	0.231316	0.071789	0.278949	no hit	FALSE
CABLES1	Q8TDN4|Q8TDN4-2|Q8TDN4-4	CDK5 and ABL1 enzyme substrate 1 OS=Homo sapiens GN=CABLES1 PE=1 SV=2|Isoform 2 of CDK5 and ABL1 enzyme substrate 1 OS=Homo sapiens GN=CABLES1|Isoform 4 of CDK5 and ABL1 enzyme substrate 1 OS=Homo sapiens GN=CABLES1	0.231224	0.0585797	0.249877	no hit	FALSE
SGO2	Q562F6|Q562F6-2	Shugoshin 2 OS=Homo sapiens GN=SGO2 PE=1 SV=2|Isoform 2 of Shugoshin 2 OS=Homo sapiens GN=SGO2	0.231137	0.228659	0.514168	no hit	FALSE
TRIP12	Q14669|Q14669-2|Q14669-3	E3 ubiquitin-protein ligase TRIP12 OS=Homo sapiens GN=TRIP12 PE=1 SV=1|Isoform 2 of E3 ubiquitin-protein ligase TRIP12 OS=Homo sapiens GN=TRIP12|Isoform 3 of E3 ubiquitin-protein ligase TRIP12 OS=Homo sapiens GN=TRIP12	0.231135	0.112849	0.354319	no hit	FALSE
PCYT1A	C9J050|C9JEJ2|P49585	Choline-phosphate cytidylyltransferase A (Fragment) OS=Homo sapiens GN=PCYT1A PE=1 SV=1|Choline-phosphate cytidylyltransferase A OS=Homo sapiens GN=PCYT1A PE=1 SV=1|Choline-phosphate cytidylyltransferase A OS=Homo sapiens GN=PCYT1A PE=1 SV=2	0.231127	0.129962	0.382713	no hit	FALSE
PSMC2	P35998	26S protease regulatory subunit 7 OS=Homo sapiens GN=PSMC2 PE=1 SV=3	0.230981	0.0697819	0.274249	enriched no hit	FALSE
DLG5	Q8TDM6|Q8TDM6-2|Q8TDM6-4	Disks large homolog 5 OS=Homo sapiens GN=DLG5 PE=1 SV=4|Isoform 2 of Disks large homolog 5 OS=Homo sapiens GN=DLG5|Isoform 4 of Disks large homolog 5 OS=Homo sapiens GN=DLG5	0.230755	0.0818792	0.297296	no hit	FALSE
PSMB5	P28074	Proteasome subunit beta type-5 OS=Homo sapiens GN=PSMB5 PE=1 SV=3	0.230182	0.322788	0.602538	no hit	FALSE
CPSF6	F8WJN3|Q16630|Q16630-2|Q16630-3	Cleavage and polyadenylation-specificity factor subunit 6 OS=Homo sapiens GN=CPSF6 PE=1 SV=1|Cleavage and polyadenylation specificity factor subunit 6 OS=Homo sapiens GN=CPSF6 PE=1 SV=2|Isoform 2 of Cleavage and polyadenylation specificity factor subunit 6 OS=Homo sapiens GN=CPSF6|Isoform 3 of Cleavage and polyadenylation specificity factor subunit 6 OS=Homo sapiens GN=CPSF6	0.22978	0.274496	0.562575	no hit	FALSE
PLEKHG4	Q58EX7|Q58EX7-2	Isoform 2 of Puratrophin-1 OS=Homo sapiens GN=PLEKHG4|Puratrophin-1 OS=Homo sapiens GN=PLEKHG4 PE=1 SV=1	0.229282	0.0792055	0.291361	no hit	FALSE
PSMB1	P20618	Proteasome subunit beta type-1 OS=Homo sapiens GN=PSMB1 PE=1 SV=2	0.229244	0.186472	0.462217	enriched no hit	FALSE
ABCC1	I3L4X2|P33527|P33527-2|P33527-4|P33527-6|P33527-9	Isoform 2 of Multidrug resistance-associated protein 1 OS=Homo sapiens GN=ABCC1|Isoform 4 of Multidrug resistance-associated protein 1 OS=Homo sapiens GN=ABCC1|Isoform 6 of Multidrug resistance-associated protein 1 OS=Homo sapiens GN=ABCC1|Isoform 9 of Multidrug resistance-associated protein 1 OS=Homo sapiens GN=ABCC1|Multidrug resistance-associated protein 1 (Fragment) OS=Homo sapiens GN=ABCC1 P…	0.228973	0.0427945	0.216587	no hit	FALSE
ANKRD26	E7ESJ3|Q9UPS8|Q9UPS8-2|Q9UPS8-3	Ankyrin repeat domain-containing protein 26 OS=Homo sapiens GN=ANKRD26 PE=1 SV=1|Ankyrin repeat domain-containing protein 26 OS=Homo sapiens GN=ANKRD26 PE=1 SV=3|Isoform 2 of Ankyrin repeat domain-containing protein 26 OS=Homo sapiens GN=ANKRD26|Isoform 3 of Ankyrin repeat domain-containing protein 26 OS=Homo sapiens GN=ANKRD26	0.227588	0.162049	0.433785	no hit	FALSE
PLCG1	P19174|P19174-2	1-phosphatidylinositol 4,5-bisphosphate phosphodiesterase gamma-1 OS=Homo sapiens GN=PLCG1 PE=1 SV=1|Isoform 2 of 1-phosphatidylinositol 4,5-bisphosphate phosphodiesterase gamma-1 OS=Homo sapiens GN=PLCG1	0.227477	0.0408987	0.211466	no hit	FALSE
ZWINT	A6NH27|O95229|O95229-2	Isoform 2 of ZW10 interactor OS=Homo sapiens GN=ZWINT|ZW10 interactor OS=Homo sapiens GN=ZWINT PE=1 SV=1|ZW10 interactor OS=Homo sapiens GN=ZWINT PE=1 SV=2	0.227469	0.0461187	0.224899	enriched no hit	FALSE
NSUN5	Q96P11|Q96P11-2|Q96P11-4|Q96P11-5	Isoform 2 of Probable 28S rRNA (cytosine-C(5))-methyltransferase OS=Homo sapiens GN=NSUN5|Isoform 4 of Probable 28S rRNA (cytosine-C(5))-methyltransferase OS=Homo sapiens GN=NSUN5|Isoform 5 of Probable 28S rRNA (cytosine-C(5))-methyltransferase OS=Homo sapiens GN=NSUN5|Probable 28S rRNA (cytosine-C(5))-methyltransferase OS=Homo sapiens GN=NSUN5 PE=1 SV=2	0.227147	0.0982134	0.330218	no hit	FALSE
NEDD4	H0Y8X6|P46934|P46934-2|P46934-3|P46934-4	E3 ubiquitin-protein ligase NEDD4 (Fragment) OS=Homo sapiens GN=NEDD4 PE=1 SV=1|E3 ubiquitin-protein ligase NEDD4 OS=Homo sapiens GN=NEDD4 PE=1 SV=4|Isoform 2 of E3 ubiquitin-protein ligase NEDD4 OS=Homo sapiens GN=NEDD4|Isoform 3 of E3 ubiquitin-protein ligase NEDD4 OS=Homo sapiens GN=NEDD4|Isoform 4 of E3 ubiquitin-protein ligase NEDD4 OS=Homo sapiens GN=NEDD4	0.226062	0.159542	0.431837	no hit	FALSE
APPL1	Q9UKG1	DCC-interacting protein 13-alpha OS=Homo sapiens GN=APPL1 PE=1 SV=1	0.225681	0.122008	0.370735	no hit	FALSE
CDC20	Q12834	Cell division cycle protein 20 homolog OS=Homo sapiens GN=CDC20 PE=1 SV=2	0.224164	0.0853434	0.30495	enriched no hit	FALSE
FBXO7	Q9Y3I1|Q9Y3I1-2|Q9Y3I1-3	F-box only protein 7 OS=Homo sapiens GN=FBXO7 PE=1 SV=1|Isoform 2 of F-box only protein 7 OS=Homo sapiens GN=FBXO7|Isoform 3 of F-box only protein 7 OS=Homo sapiens GN=FBXO7	0.222853	0.0740614	0.2826	no hit	FALSE
GGA3	J3KSS7|J3KTR5|Q9NZ52|Q9NZ52-2|Q9NZ52-3|Q9NZ52-4	ADP-ribosylation factor-binding protein GGA3 (Fragment) OS=Homo sapiens GN=GGA3 PE=1 SV=1|ADP-ribosylation factor-binding protein GGA3 OS=Homo sapiens GN=GGA3 PE=1 SV=1|Isoform 3 of ADP-ribosylation factor-binding protein GGA3 OS=Homo sapiens GN=GGA3|Isoform 4 of ADP-ribosylation factor-binding protein GGA3 OS=Homo sapiens GN=GGA3|Isoform Short of ADP-ribosylation factor-binding protein GGA3 OS=H…	0.222425	0.104921	0.341562	no hit	FALSE
SEC11A	H0YNA5|H0YNG3|H0YNX5|P67812|P67812-2|P67812-3|P67812-4	Isoform 2 of Signal peptidase complex catalytic subunit SEC11A OS=Homo sapiens GN=SEC11A|Isoform 3 of Signal peptidase complex catalytic subunit SEC11A OS=Homo sapiens GN=SEC11A|Isoform 4 of Signal peptidase complex catalytic subunit SEC11A OS=Homo sapiens GN=SEC11A|Signal peptidase complex catalytic subunit SEC11 (Fragment) OS=Homo sapiens GN=SEC11A PE=1 SV=1|Signal peptidase complex catalytic s…	0.222236	0.101889	0.335348	no hit	FALSE
BBX	C9J8D0|C9JA69|Q8WY36|Q8WY36-2|Q8WY36-3	HMG box transcription factor BBX (Fragment) OS=Homo sapiens GN=BBX PE=1 SV=1|HMG box transcription factor BBX OS=Homo sapiens GN=BBX PE=1 SV=1|Isoform 2 of HMG box transcription factor BBX OS=Homo sapiens GN=BBX|Isoform 3 of HMG box transcription factor BBX OS=Homo sapiens GN=BBX	0.22214	0.305853	0.589217	no hit	FALSE
DEGS1	E7EMA0|O15121	Sphingolipid delta(4)-desaturase DES1 (Fragment) OS=Homo sapiens GN=DEGS1 PE=1 SV=1|Sphingolipid delta(4)-desaturase DES1 OS=Homo sapiens GN=DEGS1 PE=1 SV=1	0.222118	0.098668	0.331137	no hit	FALSE
DCTN3	O75935|O75935-3|X6RCK5	Dynactin subunit 3 OS=Homo sapiens GN=DCTN3 PE=1 SV=1|Isoform 3 of Dynactin subunit 3 OS=Homo sapiens GN=DCTN3|Dynactin subunit 3 (Fragment) OS=Homo sapiens GN=DCTN3 PE=1 SV=1	0.221693	0.18592	0.461957	enriched no hit	FALSE
RAD23A	P54725|P54725-2|P54725-3	UV excision repair protein RAD23 homolog A OS=Homo sapiens GN=RAD23A PE=1 SV=1|Isoform 2 of UV excision repair protein RAD23 homolog A OS=Homo sapiens GN=RAD23A|Isoform 3 of UV excision repair protein RAD23 homolog A OS=Homo sapiens GN=RAD23A	0.221435	0.387409	0.655326	no hit	FALSE
BRCA2	P51587	Breast cancer type 2 susceptibility protein OS=Homo sapiens GN=BRCA2 PE=1 SV=3	0.22101	0.03056	0.179149	no hit	FALSE
BTBD2	Q9BX70	BTB/POZ domain-containing protein 2 OS=Homo sapiens GN=BTBD2 PE=1 SV=1	0.22073	0.15301	0.419051	no hit	FALSE
IFT81	H0YHE2|Q8WYA0	Intraflagellar transport protein 81 homolog (Fragment) OS=Homo sapiens GN=IFT81 PE=1 SV=1|Intraflagellar transport protein 81 homolog OS=Homo sapiens GN=IFT81 PE=1 SV=1	0.220564	0.186026	0.461957	no hit	FALSE
ALMS1	A0A087WTU9|A0A087WV20|A0A087WZY3|Q8TCU4|Q8TCU4-2|Q8TCU4-3	Alstrom syndrome protein 1 OS=Homo sapiens GN=ALMS1 PE=1 SV=1|Alstrom syndrome protein 1 OS=Homo sapiens GN=ALMS1 PE=1 SV=1|Alstrom syndrome protein 1 OS=Homo sapiens GN=ALMS1 PE=1 SV=1|Alstrom syndrome protein 1 OS=Homo sapiens GN=ALMS1 PE=1 SV=3|Isoform 2 of Alstrom syndrome protein 1 OS=Homo sapiens GN=ALMS1|Isoform 3 of Alstrom syndrome protein 1 OS=Homo sapiens GN=ALMS1	0.220214	0.0779552	0.291361	no hit	FALSE
UBR1	A0A087WTJ9|Q8IWV7	E3 ubiquitin-protein ligase UBR1 OS=Homo sapiens GN=UBR1 PE=1 SV=1	0.220187	0.0755041	0.285339	no hit	FALSE
OS9	Q13438|Q13438-2|Q13438-5|Q13438-6|Q13438-7	Isoform 2 of Protein OS-9 OS=Homo sapiens GN=OS9|Isoform 5 of Protein OS-9 OS=Homo sapiens GN=OS9|Isoform 6 of Protein OS-9 OS=Homo sapiens GN=OS9|Isoform 7 of Protein OS-9 OS=Homo sapiens GN=OS9|Protein OS-9 OS=Homo sapiens GN=OS9 PE=1 SV=1	0.220181	0.104397	0.340915	no hit	FALSE
HBS1L	Q9Y450|Q9Y450-2	HBS1-like protein OS=Homo sapiens GN=HBS1L PE=1 SV=1|Isoform 2 of HBS1-like protein OS=Homo sapiens GN=HBS1L	0.220179	0.0526984	0.237474	no hit	FALSE
YEATS4	O95619	YEATS domain-containing protein 4 OS=Homo sapiens GN=YEATS4 PE=1 SV=1	0.219944	0.067411	0.269337	no hit	FALSE
KDM4B	A0A0C4DFL8|F5GX28|O94953	Lysine-specific demethylase 4B OS=Homo sapiens GN=KDM4B PE=1 SV=1|Lysine-specific demethylase 4B OS=Homo sapiens GN=KDM4B PE=1 SV=2|Lysine-specific demethylase 4B OS=Homo sapiens GN=KDM4B PE=1 SV=4	0.219581	0.202553	0.483059	no hit	FALSE
ATP6V1H	Q9UI12|Q9UI12-2	V-type proton ATPase subunit H OS=Homo sapiens GN=ATP6V1H PE=1 SV=1|Isoform 2 of V-type proton ATPase subunit H OS=Homo sapiens GN=ATP6V1H	0.219351	0.0281355	0.171982	no hit	FALSE
KIF20B	Q96Q89|Q96Q89-2|Q96Q89-3|Q96Q89-4	Isoform 2 of Kinesin-like protein KIF20B OS=Homo sapiens GN=KIF20B|Isoform 3 of Kinesin-like protein KIF20B OS=Homo sapiens GN=KIF20B|Isoform 4 of Kinesin-like protein KIF20B OS=Homo sapiens GN=KIF20B|Kinesin-like protein KIF20B OS=Homo sapiens GN=KIF20B PE=1 SV=3	0.219158	0.166448	0.438097	no hit	FALSE
SMARCD1	F8VUB0|F8VZ70|Q96GM5|Q96GM5-2	Isoform 2 of SWI/SNF-related matrix-associated actin-dependent regulator of chromatin subfamily D member 1 OS=Homo sapiens GN=SMARCD1|SWI/SNF-related matrix-associated actin-dependent regulator of chromatin subfamily D member 1 (Fragment) OS=Homo sapiens GN=SMARCD1 PE=1 SV=1|SWI/SNF-related matrix-associated actin-dependent regulator of chromatin subfamily D member 1 (Fragment) OS=Homo sapiens GN…	0.2188	0.20349	0.483255	no hit	FALSE
ITGA6	P23229|P23229-2|P23229-3|P23229-4|P23229-5|P23229-6|P23229-7|P23229-9	Integrin alpha-6 OS=Homo sapiens GN=ITGA6 PE=1 SV=5|Isoform 7 of Integrin alpha-6 OS=Homo sapiens GN=ITGA6|Isoform 9 of Integrin alpha-6 OS=Homo sapiens GN=ITGA6|Isoform Alpha-6X1A of Integrin alpha-6 OS=Homo sapiens GN=ITGA6|Isoform Alpha-6X1B of Integrin alpha-6 OS=Homo sapiens GN=ITGA6|Isoform Alpha-6X1X2A of Integrin alpha-6 OS=Homo sapiens GN=ITGA6|Isoform Alpha-6X2A of Integrin alpha-6 OS=H…	0.218734	0.0655109	0.2657	no hit	FALSE
N4BP2	H0YA93|Q86UW6|Q86UW6-2	NEDD4-binding protein 2 (Fragment) OS=Homo sapiens GN=N4BP2 PE=1 SV=1|NEDD4-binding protein 2 OS=Homo sapiens GN=N4BP2 PE=1 SV=2|Isoform 2 of NEDD4-binding protein 2 OS=Homo sapiens GN=N4BP2	0.218637	0.100952	0.334303	no hit	FALSE
ABCC4	O15439	Multidrug resistance-associated protein 4 OS=Homo sapiens GN=ABCC4 PE=1 SV=3	0.218325	0.0670094	0.268721	no hit	FALSE
BCR	P11274|P11274-2	Breakpoint cluster region protein OS=Homo sapiens GN=BCR PE=1 SV=2|Isoform 2 of Breakpoint cluster region protein OS=Homo sapiens GN=BCR	0.217906	0.0357938	0.195623	no hit	FALSE
TSC2	H3BMQ0|P49815|P49815-2|P49815-3|P49815-4|P49815-5|P49815-7	Isoform 2 of Tuberin OS=Homo sapiens GN=TSC2|Isoform 3 of Tuberin OS=Homo sapiens GN=TSC2|Isoform 4 of Tuberin OS=Homo sapiens GN=TSC2|Isoform 5 of Tuberin OS=Homo sapiens GN=TSC2|Isoform 7 of Tuberin OS=Homo sapiens GN=TSC2|Tuberin OS=Homo sapiens GN=TSC2 PE=1 SV=1|Tuberin OS=Homo sapiens GN=TSC2 PE=1 SV=2	0.217685	0.108498	0.345513	no hit	FALSE
BTBD9	Q96Q07|Q96Q07-2|Q96Q07-3	BTB/POZ domain-containing protein 9 OS=Homo sapiens GN=BTBD9 PE=2 SV=2|Isoform 2 of BTB/POZ domain-containing protein 9 OS=Homo sapiens GN=BTBD9|Isoform 3 of BTB/POZ domain-containing protein 9 OS=Homo sapiens GN=BTBD9	0.217678	0.06505	0.265385	no hit	FALSE
KIF5B	P33176	Kinesin-1 heavy chain OS=Homo sapiens GN=KIF5B PE=1 SV=1	0.217587	0.139599	0.398781	no hit	FALSE
PSMB7	Q99436	Proteasome subunit beta type-7 OS=Homo sapiens GN=PSMB7 PE=1 SV=1	0.217428	0.265944	0.552237	enriched no hit	FALSE
CXorf57	Q6NSI4	Uncharacterized protein CXorf57 OS=Homo sapiens GN=CXorf57 PE=1 SV=2	0.217343	0.0583248	0.249877	no hit	FALSE
PSMC1	P62191	26S protease regulatory subunit 4 OS=Homo sapiens GN=PSMC1 PE=1 SV=1	0.216214	0.274399	0.562575	no hit	FALSE
GNAI3	P08754	Guanine nucleotide-binding protein G(k) subunit alpha OS=Homo sapiens GN=GNAI3 PE=1 SV=3	0.216201	0.185938	0.461957	no hit	FALSE
POLE	F5H1D6|Q07864	DNA polymerase epsilon catalytic subunit A OS=Homo sapiens GN=POLE PE=1 SV=5|DNA polymerase OS=Homo sapiens GN=POLE PE=1 SV=1	0.216056	0.0453493	0.222247	no hit	FALSE
NFKB1	P19838|P19838-2	Nuclear factor NF-kappa-B p105 subunit OS=Homo sapiens GN=NFKB1 PE=1 SV=2|Isoform 2 of Nuclear factor NF-kappa-B p105 subunit OS=Homo sapiens GN=NFKB1	0.215895	0.0517769	0.236656	no hit	FALSE
KDM4A	O75164	Lysine-specific demethylase 4A OS=Homo sapiens GN=KDM4A PE=1 SV=2	0.215881	0.120847	0.368275	no hit	FALSE
INTS8	H0YBS1|J3KNV5|Q75QN2|Q75QN2-2	Integrator complex subunit 8 (Fragment) OS=Homo sapiens GN=INTS8 PE=1 SV=1|Integrator complex subunit 8 OS=Homo sapiens GN=INTS8 PE=1 SV=1|Isoform 2 of Integrator complex subunit 8 OS=Homo sapiens GN=INTS8	0.215777	0.235697	0.519803	no hit	FALSE
UHRF1	A0A087WTW0|A0A087WVR3|Q96T88|Q96T88-2	E3 ubiquitin-protein ligase UHRF1 OS=Homo sapiens GN=UHRF1 PE=1 SV=1|E3 ubiquitin-protein ligase UHRF1 OS=Homo sapiens GN=UHRF1 PE=1 SV=1|E3 ubiquitin-protein ligase UHRF1 OS=Homo sapiens GN=UHRF1 PE=1 SV=1|Isoform 2 of E3 ubiquitin-protein ligase UHRF1 OS=Homo sapiens GN=UHRF1	0.215632	0.0723268	0.278949	no hit	FALSE
NR2C1	P13056	Nuclear receptor subfamily 2 group C member 1 OS=Homo sapiens GN=NR2C1 PE=1 SV=2	0.215425	0.0340428	0.190239	no hit	FALSE
NAP1L2	Q9ULW6|Q9ULW6-2	Isoform 2 of Nucleosome assembly protein 1-like 2 OS=Homo sapiens GN=NAP1L2|Nucleosome assembly protein 1-like 2 OS=Homo sapiens GN=NAP1L2 PE=1 SV=1	0.215324	0.176216	0.44796	no hit	FALSE
TOM1	O60784|O60784-2|O60784-3|O60784-4	Isoform 2 of Target of Myb protein 1 OS=Homo sapiens GN=TOM1|Isoform 3 of Target of Myb protein 1 OS=Homo sapiens GN=TOM1|Isoform 4 of Target of Myb protein 1 OS=Homo sapiens GN=TOM1|Target of Myb protein 1 OS=Homo sapiens GN=TOM1 PE=1 SV=2	0.215163	0.271347	0.560132	no hit	FALSE
DDI2	Q5TDH0|Q5TDH0-2|Q5TDH0-3	Isoform 2 of Protein DDI1 homolog 2 OS=Homo sapiens GN=DDI2|Isoform 3 of Protein DDI1 homolog 2 OS=Homo sapiens GN=DDI2|Protein DDI1 homolog 2 OS=Homo sapiens GN=DDI2 PE=1 SV=1	0.214691	0.274401	0.562575	no hit	FALSE
MCM7	P33993	DNA replication licensing factor MCM7 OS=Homo sapiens GN=MCM7 PE=1 SV=4	0.214448	0.0147008	0.122754	no hit	FALSE
SIRT2	A0A087WYM3|A0A0A0MRF5|E7EWX6|Q8IXJ6|Q8IXJ6-2|Q8IXJ6-3|Q8IXJ6-4|Q8IXJ6-5	Isoform 2 of NAD-dependent protein deacetylase sirtuin-2 OS=Homo sapiens GN=SIRT2|Isoform 3 of NAD-dependent protein deacetylase sirtuin-2 OS=Homo sapiens GN=SIRT2|Isoform 4 of NAD-dependent protein deacetylase sirtuin-2 OS=Homo sapiens GN=SIRT2|Isoform 5 of NAD-dependent protein deacetylase sirtuin-2 OS=Homo sapiens GN=SIRT2|NAD-dependent protein deacetylase sirtuin-2 (Fragment) OS=Homo sapiens …	0.21444	0.124323	0.375587	no hit	FALSE
DCAKD	K7ESP4|Q8WVC6	Dephospho-CoA kinase domain-containing protein (Fragment) OS=Homo sapiens GN=DCAKD PE=1 SV=1|Dephospho-CoA kinase domain-containing protein OS=Homo sapiens GN=DCAKD PE=1 SV=1	0.21396	0.179373	0.453183	no hit	FALSE
CDKAL1	Q5VV42	Threonylcarbamoyladenosine tRNA methylthiotransferase OS=Homo sapiens GN=CDKAL1 PE=1 SV=1	0.213026	0.0289194	0.17405	no hit	FALSE
WWP1	Q9H0M0|Q9H0M0-3|Q9H0M0-6	Isoform 3 of NEDD4-like E3 ubiquitin-protein ligase WWP1 OS=Homo sapiens GN=WWP1|Isoform 6 of NEDD4-like E3 ubiquitin-protein ligase WWP1 OS=Homo sapiens GN=WWP1|NEDD4-like E3 ubiquitin-protein ligase WWP1 OS=Homo sapiens GN=WWP1 PE=1 SV=1	0.212947	0.041033	0.211466	no hit	FALSE
TTC37	Q6PGP7	Tetratricopeptide repeat protein 37 OS=Homo sapiens GN=TTC37 PE=1 SV=1	0.212852	0.0462428	0.224899	no hit	FALSE
PAF1	Q8N7H5|Q8N7H5-2|Q8N7H5-3	RNA polymerase II-associated factor 1 homolog OS=Homo sapiens GN=PAF1 PE=1 SV=2|Isoform 2 of RNA polymerase II-associated factor 1 homolog OS=Homo sapiens GN=PAF1|Isoform 3 of RNA polymerase II-associated factor 1 homolog OS=Homo sapiens GN=PAF1	0.212533	0.0599287	0.250872	no hit	FALSE
EIF3B	P55884|P55884-2	Eukaryotic translation initiation factor 3 subunit B OS=Homo sapiens GN=EIF3B PE=1 SV=3|Isoform 2 of Eukaryotic translation initiation factor 3 subunit B OS=Homo sapiens GN=EIF3B	0.212433	0.272086	0.560608	no hit	FALSE
FLII	Q13045|Q13045-2	Isoform 2 of Protein flightless-1 homolog OS=Homo sapiens GN=FLII|Protein flightless-1 homolog OS=Homo sapiens GN=FLII PE=1 SV=2	0.212168	0.111057	0.351657	enriched no hit	FALSE
SH3GLB1	A0A087WW40|Q9Y371|Q9Y371-2	Endophilin-B1 OS=Homo sapiens GN=SH3GLB1 PE=1 SV=1|Endophilin-B1 OS=Homo sapiens GN=SH3GLB1 PE=1 SV=1|Isoform 2 of Endophilin-B1 OS=Homo sapiens GN=SH3GLB1	0.211612	0.203375	0.483255	enriched no hit	FALSE
KIDINS220	Q9ULH0|Q9ULH0-2|Q9ULH0-4	Isoform 2 of Kinase D-interacting substrate of 220 kDa OS=Homo sapiens GN=KIDINS220|Isoform 4 of Kinase D-interacting substrate of 220 kDa OS=Homo sapiens GN=KIDINS220|Kinase D-interacting substrate of 220 kDa OS=Homo sapiens GN=KIDINS220 PE=1 SV=3	0.211507	0.0962943	0.326654	no hit	FALSE
CEP131	Q9UPN4|Q9UPN4-2	Centrosomal protein of 131 kDa OS=Homo sapiens GN=CEP131 PE=1 SV=3|Isoform 2 of Centrosomal protein of 131 kDa OS=Homo sapiens GN=CEP131	0.211122	0.118398	0.365083	no hit	FALSE
KIF3A	A0A087X011|E9PES4|J3KPF9|Q9Y496	Kinesin-like protein OS=Homo sapiens GN=KIF3A PE=1 SV=1|Kinesin-like protein OS=Homo sapiens GN=KIF3A PE=1 SV=1|Kinesin-like protein OS=Homo sapiens GN=KIF3A PE=1 SV=1|Kinesin-like protein KIF3A OS=Homo sapiens GN=KIF3A PE=1 SV=4	0.210837	0.166845	0.438097	no hit	FALSE
COG4	A0A0A0MS45|J3KNI1|Q9H9E3	Conserved oligomeric Golgi complex subunit 4 OS=Homo sapiens GN=COG4 PE=1 SV=1|Conserved oligomeric Golgi complex subunit 4 OS=Homo sapiens GN=COG4 PE=1 SV=1|Conserved oligomeric Golgi complex subunit 4 OS=Homo sapiens GN=COG4 PE=1 SV=3	0.210758	0.0492314	0.229941	no hit	FALSE
ZRANB1	Q9UGI0	Ubiquitin thioesterase ZRANB1 OS=Homo sapiens GN=ZRANB1 PE=1 SV=2	0.21053	0.0653558	0.2657	no hit	FALSE
APC	P25054|P25054-2	Adenomatous polyposis coli protein OS=Homo sapiens GN=APC PE=1 SV=2|Isoform Short of Adenomatous polyposis coli protein OS=Homo sapiens GN=APC	0.20978	0.26504	0.551149	no hit	FALSE
PKP2	B8QGS9|Q99959|Q99959-2	Isoform 1 of Plakophilin-2 OS=Homo sapiens GN=PKP2|Plakophilin-2 OS=Homo sapiens GN=PKP2 PE=1 SV=1|Plakophilin-2 OS=Homo sapiens GN=PKP2 PE=1 SV=2	0.209747	0.0917572	0.318091	no hit	FALSE
IGF2R	P11717	Cation-independent mannose-6-phosphate receptor OS=Homo sapiens GN=IGF2R PE=1 SV=3	0.209318	0.0573377	0.248526	no hit	FALSE
UCHL5	H0Y6Y4|Q5LJA5|Q5LJA9|Q9Y5K5|Q9Y5K5-2|Q9Y5K5-3|Q9Y5K5-4	Isoform 2 of Ubiquitin carboxyl-terminal hydrolase isozyme L5 OS=Homo sapiens GN=UCHL5|Isoform 3 of Ubiquitin carboxyl-terminal hydrolase isozyme L5 OS=Homo sapiens GN=UCHL5|Isoform 4 of Ubiquitin carboxyl-terminal hydrolase isozyme L5 OS=Homo sapiens GN=UCHL5|Ubiquitin carboxyl-terminal hydrolase (Fragment) OS=Homo sapiens GN=UCHL5 PE=1 SV=1|Ubiquitin carboxyl-terminal hydrolase isozyme L5 (Frag…	0.208831	0.240735	0.525964	no hit	FALSE
RPS3	E9PJN9|P23396	40S ribosomal protein S3 (Fragment) OS=Homo sapiens GN=RPS3 PE=1 SV=1|40S ribosomal protein S3 OS=Homo sapiens GN=RPS3 PE=1 SV=2	0.208424	0.199647	0.479031	no hit	FALSE
GLE1	Q53GS7|Q53GS7-2	Isoform 2 of Nucleoporin GLE1 OS=Homo sapiens GN=GLE1|Nucleoporin GLE1 OS=Homo sapiens GN=GLE1 PE=1 SV=2	0.207988	0.0902109	0.31624	no hit	FALSE
PHF8	H0Y3N9|Q9UPP1|Q9UPP1-2|Q9UPP1-5	Histone lysine demethylase PHF8 (Fragment) OS=Homo sapiens GN=PHF8 PE=1 SV=1|Histone lysine demethylase PHF8 OS=Homo sapiens GN=PHF8 PE=1 SV=3|Isoform 2 of Histone lysine demethylase PHF8 OS=Homo sapiens GN=PHF8|Isoform 5 of Histone lysine demethylase PHF8 OS=Homo sapiens GN=PHF8	0.207983	0.058908	0.250185	no hit	FALSE
PRKG1	A0A0A0MSB3|Q13976|Q13976-2|Q13976-3	cGMP-dependent protein kinase 1 OS=Homo sapiens GN=PRKG1 PE=1 SV=1|cGMP-dependent protein kinase 1 OS=Homo sapiens GN=PRKG1 PE=1 SV=3|Isoform 3 of cGMP-dependent protein kinase 1 OS=Homo sapiens GN=PRKG1|Isoform Beta of cGMP-dependent protein kinase 1 OS=Homo sapiens GN=PRKG1	0.207794	0.231411	0.515206	no hit	FALSE
ATP6AP1	A0A0C4DGX8|Q15904	ATPase, H+ transporting, lysosomal accessory protein 1, isoform CRA_c OS=Homo sapiens GN=ATP6AP1 PE=1 SV=1|V-type proton ATPase subunit S1 OS=Homo sapiens GN=ATP6AP1 PE=1 SV=2	0.207053	0.194598	0.4717	no hit	FALSE
SCD	O00767	Acyl-CoA desaturase OS=Homo sapiens GN=SCD PE=1 SV=2	0.206803	0.128111	0.378999	no hit	FALSE
KIAA1524	A0A087X211|Q8TCG1	Protein CIP2A OS=Homo sapiens GN=KIAA1524 PE=1 SV=1|Protein CIP2A OS=Homo sapiens GN=KIAA1524 PE=1 SV=2	0.206338	0.0619562	0.255955	no hit	FALSE
AMFR	Q9UKV5	E3 ubiquitin-protein ligase AMFR OS=Homo sapiens GN=AMFR PE=1 SV=2	0.205762	0.176592	0.448317	no hit	FALSE
CETN2	P41208	Centrin-2 OS=Homo sapiens GN=CETN2 PE=1 SV=1	0.204793	0.150521	0.415285	no hit	FALSE
RAB3GAP2	Q9H2M9	Rab3 GTPase-activating protein non-catalytic subunit OS=Homo sapiens GN=RAB3GAP2 PE=1 SV=1	0.204582	0.0467227	0.225242	no hit	FALSE
PEF1	Q9UBV8	Peflin OS=Homo sapiens GN=PEF1 PE=1 SV=1	0.203945	0.102782	0.337667	no hit	FALSE
EPHA2	P29317	Ephrin type-A receptor 2 OS=Homo sapiens GN=EPHA2 PE=1 SV=2	0.203858	0.241674	0.526274	no hit	FALSE
UBE3C	Q15386	Ubiquitin-protein ligase E3C OS=Homo sapiens GN=UBE3C PE=1 SV=3	0.203839	0.0593448	0.250301	no hit	FALSE
SREBF2	Q12772	Sterol regulatory element-binding protein 2 OS=Homo sapiens GN=SREBF2 PE=1 SV=2	0.203775	0.117403	0.363049	no hit	FALSE
DNAJB12	J3KPS0|Q9NXW2|Q9NXW2-2	DnaJ (Hsp40) homolog, subfamily B, member 12, isoform CRA_c OS=Homo sapiens GN=DNAJB12 PE=1 SV=1|DnaJ homolog subfamily B member 12 OS=Homo sapiens GN=DNAJB12 PE=1 SV=4|Isoform 2 of DnaJ homolog subfamily B member 12 OS=Homo sapiens GN=DNAJB12	0.203355	0.0469619	0.225423	no hit	FALSE
CFL1	E9PP50|P23528	Cofilin-1 (Fragment) OS=Homo sapiens GN=CFL1 PE=1 SV=7|Cofilin-1 OS=Homo sapiens GN=CFL1 PE=1 SV=3	0.203352	0.336382	0.614149	no hit	FALSE
POLR3A	O14802	DNA-directed RNA polymerase III subunit RPC1 OS=Homo sapiens GN=POLR3A PE=1 SV=2	0.203138	0.0602289	0.25146	no hit	FALSE
SEC31A	D6REX3|O94979|O94979-2|O94979-3|O94979-8|O94979-9	Protein transport protein Sec31A OS=Homo sapiens GN=SEC31A PE=1 SV=1|Protein transport protein Sec31A OS=Homo sapiens GN=SEC31A PE=1 SV=3|Isoform 2 of Protein transport protein Sec31A OS=Homo sapiens GN=SEC31A|Isoform 3 of Protein transport protein Sec31A OS=Homo sapiens GN=SEC31A|Isoform 8 of Protein transport protein Sec31A OS=Homo sapiens GN=SEC31A|Isoform 9 of Protein transport protein Sec31A…	0.202979	0.0812423	0.296212	no hit	FALSE
MYO6	A0A0A0MRM8|Q9UM54-6	Unconventional myosin-VI OS=Homo sapiens GN=MYO6 PE=1 SV=1|Isoform 6 of Unconventional myosin-VI OS=Homo sapiens GN=MYO6	0.202832	0.131559	0.386331	no hit	FALSE
G2E3	F5GX24|G3V483|Q7L622	G2/M phase-specific E3 ubiquitin-protein ligase OS=Homo sapiens GN=G2E3 PE=1 SV=1|G2/M phase-specific E3 ubiquitin-protein ligase OS=Homo sapiens GN=G2E3 PE=1 SV=1|G2/M phase-specific E3 ubiquitin-protein ligase OS=Homo sapiens GN=G2E3 PE=1 SV=1	0.202376	0.0858272	0.305984	no hit	FALSE
MUM1	A0A0D9SGJ8|J3KNX4|Q2TAK8|Q2TAK8-2|Q2TAK8-3	Isoform 2 of PWWP domain-containing protein MUM1 OS=Homo sapiens GN=MUM1|Isoform 3 of PWWP domain-containing protein MUM1 OS=Homo sapiens GN=MUM1|PWWP domain-containing protein MUM1 OS=Homo sapiens GN=MUM1 PE=1 SV=1|PWWP domain-containing protein MUM1 OS=Homo sapiens GN=MUM1 PE=1 SV=3	0.200556	0.155978	0.423657	no hit	FALSE
SMARCAD1	Q9H4L7|Q9H4L7-2	Isoform 2 of SWI/SNF-related matrix-associated actin-dependent regulator of chromatin subfamily A containing DEAD/H box 1 OS=Homo sapiens GN=SMARCAD1|SWI/SNF-related matrix-associated actin-dependent regulator of chromatin subfamily A containing DEAD/H box 1 OS=Homo sapiens GN=SMARCAD1 PE=1 SV=2	0.199867	0.0379652	0.202121	no hit	FALSE
MCM10	Q5T670|Q7L590|Q7L590-2	Isoform 2 of Protein MCM10 homolog OS=Homo sapiens GN=MCM10|MCM10 minichromosome maintenance deficient 10 (S. cerevisiae), isoform CRA_b OS=Homo sapiens GN=MCM10 PE=1 SV=1|Protein MCM10 homolog OS=Homo sapiens GN=MCM10 PE=1 SV=2	0.199495	0.178335	0.451284	no hit	FALSE
SC5D	O75845	Lathosterol oxidase OS=Homo sapiens GN=SC5D PE=1 SV=2	0.199394	0.0785913	0.291361	no hit	FALSE
AMER1	Q5JTC6	APC membrane recruitment protein 1 OS=Homo sapiens GN=AMER1 PE=1 SV=2	0.199079	0.19372	0.471248	no hit	FALSE
CEP192	A0A0A0MR42|K7ENP4|K7EPA2|Q8TEP8|Q8TEP8-3	Centrosomal protein of 192 kDa (Fragment) OS=Homo sapiens GN=CEP192 PE=1 SV=1|Centrosomal protein of 192 kDa OS=Homo sapiens GN=CEP192 PE=1 SV=1|Centrosomal protein of 192 kDa OS=Homo sapiens GN=CEP192 PE=1 SV=2|Isoform 3 of Centrosomal protein of 192 kDa OS=Homo sapiens GN=CEP192	0.1984	0.074753	0.284007	no hit	FALSE
MBLAC2	Q68D91	Metallo-beta-lactamase domain-containing protein 2 OS=Homo sapiens GN=MBLAC2 PE=1 SV=3	0.197791	0.0786331	0.291361	no hit	FALSE
PDE12	F6T1Q0|Q6L8Q7|Q6L8Q7-2	2',5'-phosphodiesterase 12 OS=Homo sapiens GN=PDE12 PE=1 SV=1|2',5'-phosphodiesterase 12 OS=Homo sapiens GN=PDE12 PE=1 SV=2|Isoform 2 of 2',5'-phosphodiesterase 12 OS=Homo sapiens GN=PDE12	0.197647	0.0453954	0.222247	no hit	FALSE
KLHL15	Q96M94	Kelch-like protein 15 OS=Homo sapiens GN=KLHL15 PE=1 SV=2	0.197572	0.0749258	0.284176	no hit	FALSE
CASC5	Q8NG31|Q8NG31-2	Protein CASC5 OS=Homo sapiens GN=CASC5 PE=1 SV=3|Isoform 2 of Protein CASC5 OS=Homo sapiens GN=CASC5	0.197292	0.0767855	0.289833	no hit	FALSE
RUNDC1	Q96C34|Q96C34-2	RUN domain-containing protein 1 OS=Homo sapiens GN=RUNDC1 PE=1 SV=3|Isoform 2 of RUN domain-containing protein 1 OS=Homo sapiens GN=RUNDC1	0.196366	0.203557	0.483255	enriched no hit	FALSE
RRP7A	Q9Y3A4	Ribosomal RNA-processing protein 7 homolog A OS=Homo sapiens GN=RRP7A PE=1 SV=2	0.19631	0.257876	0.542643	no hit	FALSE
DDX1	A0A087X2G1|F1T0B3|Q92499|Q92499-3	ATP-dependent RNA helicase DDX1 OS=Homo sapiens GN=DDX1 PE=1 SV=1|ATP-dependent RNA helicase DDX1 OS=Homo sapiens GN=DDX1 PE=1 SV=2|Isoform 3 of ATP-dependent RNA helicase DDX1 OS=Homo sapiens GN=DDX1	0.196137	0.0812984	0.296212	no hit	FALSE
INTS3	Q68E01-2	Isoform 2 of Integrator complex subunit 3 OS=Homo sapiens GN=INTS3	0.195883	0.0716976	0.278949	no hit	FALSE
TOR1AIP2	Q8NFQ8	Torsin-1A-interacting protein 2 OS=Homo sapiens GN=TOR1AIP2 PE=1 SV=1	0.195091	0.0578124	0.249165	no hit	FALSE
SIPA1L2	Q9P2F8	Signal-induced proliferation-associated 1-like protein 2 OS=Homo sapiens GN=SIPA1L2 PE=1 SV=2	0.194841	0.231155	0.515206	no hit	FALSE
INTS12	A0A087WXN4|Q96CB8	Integrator complex subunit 12 OS=Homo sapiens GN=INTS12 PE=1 SV=1	0.194319	0.0862399	0.306873	no hit	FALSE
SMAD3	P84022	Mothers against decapentaplegic homolog 3 OS=Homo sapiens GN=SMAD3 PE=1 SV=1	0.194209	0.0956591	0.325551	no hit	FALSE
ACSL3	O95573	Long-chain-fatty-acid--CoA ligase 3 OS=Homo sapiens GN=ACSL3 PE=1 SV=3	0.19388	0.142501	0.402686	no hit	FALSE
CNNM2	Q9H8M5|Q9H8M5-2	Isoform 2 of Metal transporter CNNM2 OS=Homo sapiens GN=CNNM2|Metal transporter CNNM2 OS=Homo sapiens GN=CNNM2 PE=1 SV=2	0.193849	0.494034	0.73742	no hit	FALSE
PLK4	J3KR84|O00444|O00444-2|O00444-3	Serine/threonine-protein kinase PLK4 OS=Homo sapiens GN=PLK4 PE=1 SV=1|Serine/threonine-protein kinase PLK4 OS=Homo sapiens GN=PLK4 PE=1 SV=3|Isoform 2 of Serine/threonine-protein kinase PLK4 OS=Homo sapiens GN=PLK4|Isoform 3 of Serine/threonine-protein kinase PLK4 OS=Homo sapiens GN=PLK4	0.193662	0.170458	0.441151	no hit	FALSE
ZNF148	Q9UQR1	Zinc finger protein 148 OS=Homo sapiens GN=ZNF148 PE=1 SV=2	0.193128	0.101093	0.334303	no hit	FALSE
FAM207A	C9JJU7|Q9NSI2|Q9NSI2-2	Isoform B of Protein FAM207A OS=Homo sapiens GN=FAM207A|Protein FAM207A (Fragment) OS=Homo sapiens GN=FAM207A PE=1 SV=1|Protein FAM207A OS=Homo sapiens GN=FAM207A PE=1 SV=2	0.193107	0.188021	0.464227	no hit	FALSE
ERCC3	P19447	TFIIH basal transcription factor complex helicase XPB subunit OS=Homo sapiens GN=ERCC3 PE=1 SV=1	0.19237	0.122281	0.37085	no hit	FALSE
GOPC	F5H1Y4|Q9HD26|Q9HD26-2	Golgi-associated PDZ and coiled-coil motif-containing protein OS=Homo sapiens GN=GOPC PE=1 SV=1|Golgi-associated PDZ and coiled-coil motif containing protein transcript variant 3 OS=Homo sapiens GN=GOPC PE=1 SV=2|Isoform 2 of Golgi-associated PDZ and coiled-coil motif-containing protein OS=Homo sapiens GN=GOPC	0.192211	0.140029	0.399648	no hit	FALSE
ZUFSP	Q96AP4	Zinc finger with UFM1-specific peptidase domain protein OS=Homo sapiens GN=ZUFSP PE=1 SV=1	0.191989	0.0440843	0.220281	enriched no hit	FALSE
BIRC6	Q9NR09	Baculoviral IAP repeat-containing protein 6 OS=Homo sapiens GN=BIRC6 PE=1 SV=2	0.191986	0.308929	0.590815	no hit	FALSE
CEP95	A0A0A0MTQ1|Q96GE4	Centrosomal protein of 95 kDa OS=Homo sapiens GN=CEP95 PE=1 SV=1	0.191305	0.248132	0.532787	no hit	FALSE
MORC3	Q14149	MORC family CW-type zinc finger protein 3 OS=Homo sapiens GN=MORC3 PE=1 SV=3	0.190193	0.181789	0.456358	no hit	FALSE
USP19	B5MEG5|E7EST9|E7ESU0|O94966-3|O94966-4|O94966-5|O94966-6|O94966-7	Isoform 3 of Ubiquitin carboxyl-terminal hydrolase 19 OS=Homo sapiens GN=USP19|Isoform 4 of Ubiquitin carboxyl-terminal hydrolase 19 OS=Homo sapiens GN=USP19|Isoform 5 of Ubiquitin carboxyl-terminal hydrolase 19 OS=Homo sapiens GN=USP19|Isoform 6 of Ubiquitin carboxyl-terminal hydrolase 19 OS=Homo sapiens GN=USP19|Isoform 7 of Ubiquitin carboxyl-terminal hydrolase 19 OS=Homo sapiens GN=USP19|Ubiq…	0.190116	0.235209	0.519606	no hit	FALSE
RFWD2	Q8NHY2|Q8NHY2-3	E3 ubiquitin-protein ligase RFWD2 OS=Homo sapiens GN=RFWD2 PE=1 SV=1|Isoform 3 of E3 ubiquitin-protein ligase RFWD2 OS=Homo sapiens GN=RFWD2	0.189708	0.140888	0.401009	no hit	FALSE
RABEP1	Q15276	Rab GTPase-binding effector protein 1 OS=Homo sapiens GN=RABEP1 PE=1 SV=2	0.189677	0.576303	0.794657	no hit	FALSE
ZFYVE16	Q7Z3T8	Zinc finger FYVE domain-containing protein 16 OS=Homo sapiens GN=ZFYVE16 PE=1 SV=3	0.189403	0.192105	0.470255	no hit	FALSE
STEAP3	Q658P3|Q658P3-2|Q658P3-3	Metalloreductase STEAP3 OS=Homo sapiens GN=STEAP3 PE=1 SV=2|Isoform 2 of Metalloreductase STEAP3 OS=Homo sapiens GN=STEAP3|Isoform 3 of Metalloreductase STEAP3 OS=Homo sapiens GN=STEAP3	0.188534	0.077208	0.29038	no hit	FALSE
CGN	Q9P2M7	Cingulin OS=Homo sapiens GN=CGN PE=1 SV=2	0.188528	0.181341	0.456106	no hit	FALSE
CLTCL1	A0A087WX41|P53675|P53675-2	Clathrin heavy chain 2 OS=Homo sapiens GN=CLTCL1 PE=1 SV=1|Clathrin heavy chain 2 OS=Homo sapiens GN=CLTCL1 PE=1 SV=2|Isoform 2 of Clathrin heavy chain 2 OS=Homo sapiens GN=CLTCL1	0.188139	0.195516	0.472722	no hit	FALSE
ITSN1	A8CTZ0|F8W7U0|Q15811|Q15811-10|Q15811-11|Q15811-12|Q15811-13|Q15811-2|Q15811-3|Q15811-4|Q15811-5|Q15811-6|Q15811-7|Q15811-8|Q15811-9	Intersectin 1 short form variant 13 OS=Homo sapiens GN=ITSN1 PE=1 SV=1|Intersectin-1 OS=Homo sapiens GN=ITSN1 PE=1 SV=1|Intersectin-1 OS=Homo sapiens GN=ITSN1 PE=1 SV=3|Isoform 10 of Intersectin-1 OS=Homo sapiens GN=ITSN1|Isoform 11 of Intersectin-1 OS=Homo sapiens GN=ITSN1|Isoform 12 of Intersectin-1 OS=Homo sapiens GN=ITSN1|Isoform 13 of Intersectin-1 OS=Homo sapiens GN=ITSN1|Isoform 2 of Inter…	0.187267	0.194361	0.4717	no hit	FALSE
HLTF	A0A0C4DGA6|Q14527	Helicase-like transcription factor OS=Homo sapiens GN=HLTF PE=1 SV=1|Helicase-like transcription factor OS=Homo sapiens GN=HLTF PE=1 SV=2	0.186316	0.12715	0.378326	no hit	FALSE
CXorf56	Q9H5V9|Q9H5V9-2|Q9H5V9-3	UPF0428 protein CXorf56 OS=Homo sapiens GN=CXorf56 PE=1 SV=1|Isoform 2 of UPF0428 protein CXorf56 OS=Homo sapiens GN=CXorf56|Isoform 3 of UPF0428 protein CXorf56 OS=Homo sapiens GN=CXorf56	0.185732	0.0781792	0.291361	no hit	FALSE
KIAA0753	Q2KHM9	Protein moonraker OS=Homo sapiens GN=KIAA0753 PE=1 SV=3	0.185228	0.147794	0.411732	no hit	FALSE
MARS	P56192	Methionine--tRNA ligase, cytoplasmic OS=Homo sapiens GN=MARS PE=1 SV=2	0.185096	0.149176	0.413386	no hit	FALSE
IQGAP1	P46940	Ras GTPase-activating-like protein IQGAP1 OS=Homo sapiens GN=IQGAP1 PE=1 SV=1	0.184945	0.15995	0.431837	no hit	FALSE
SSX2IP	Q9Y2D8|Q9Y2D8-2|Q9Y2D8-3|S4R403	Afadin- and alpha-actinin-binding protein OS=Homo sapiens GN=SSX2IP PE=1 SV=3|Isoform 2 of Afadin- and alpha-actinin-binding protein OS=Homo sapiens GN=SSX2IP|Isoform 3 of Afadin- and alpha-actinin-binding protein OS=Homo sapiens GN=SSX2IP|Afadin- and alpha-actinin-binding protein OS=Homo sapiens GN=SSX2IP PE=1 SV=1	0.184207	0.269573	0.557496	no hit	FALSE
CNOT10	Q9H9A5|Q9H9A5-2|Q9H9A5-3|Q9H9A5-4|Q9H9A5-6	CCR4-NOT transcription complex subunit 10 OS=Homo sapiens GN=CNOT10 PE=1 SV=1|Isoform 2 of CCR4-NOT transcription complex subunit 10 OS=Homo sapiens GN=CNOT10|Isoform 3 of CCR4-NOT transcription complex subunit 10 OS=Homo sapiens GN=CNOT10|Isoform 4 of CCR4-NOT transcription complex subunit 10 OS=Homo sapiens GN=CNOT10|Isoform 6 of CCR4-NOT transcription complex subunit 10 OS=Homo sapiens GN=CNOT…	0.183568	0.0780157	0.291361	enriched no hit	FALSE
UBXN4	Q92575	UBX domain-containing protein 4 OS=Homo sapiens GN=UBXN4 PE=1 SV=2	0.183363	0.149799	0.414018	no hit	FALSE
WDCP	Q9H6R7|Q9H6R7-2	WD repeat and coiled-coil-containing protein OS=Homo sapiens GN=WDCP PE=1 SV=1|Isoform 2 of WD repeat and coiled-coil-containing protein OS=Homo sapiens GN=WDCP	0.18331	0.120332	0.368172	no hit	FALSE
SUMO1	B8ZZN6|P63165	Small ubiquitin-related modifier 1 OS=Homo sapiens GN=SUMO1 PE=1 SV=1|Small ubiquitin-related modifier 1 OS=Homo sapiens GN=SUMO1 PE=1 SV=1	0.182744	0.326528	0.605682	no hit	FALSE
CSDE1	O75534|O75534-2|O75534-3|O75534-4	Cold shock domain-containing protein E1 OS=Homo sapiens GN=CSDE1 PE=1 SV=2|Isoform 2 of Cold shock domain-containing protein E1 OS=Homo sapiens GN=CSDE1|Isoform 3 of Cold shock domain-containing protein E1 OS=Homo sapiens GN=CSDE1|Isoform 4 of Cold shock domain-containing protein E1 OS=Homo sapiens GN=CSDE1	0.182683	0.117562	0.363185	no hit	FALSE
ARF4	P18085|U3KQF2	ADP-ribosylation factor 4 OS=Homo sapiens GN=ARF4 PE=1 SV=1|ADP-ribosylation factor 4 OS=Homo sapiens GN=ARF4 PE=1 SV=3	0.182506	0.0913157	0.317637	no hit	FALSE
FEM1B	Q9UK73	Protein fem-1 homolog B OS=Homo sapiens GN=FEM1B PE=1 SV=1	0.182236	0.0474048	0.225423	no hit	FALSE
SCAMP3	O14828|O14828-2	Isoform 2 of Secretory carrier-associated membrane protein 3 OS=Homo sapiens GN=SCAMP3|Secretory carrier-associated membrane protein 3 OS=Homo sapiens GN=SCAMP3 PE=1 SV=3	0.182207	0.145175	0.407317	no hit	FALSE
CTR9	Q6PD62	RNA polymerase-associated protein CTR9 homolog OS=Homo sapiens GN=CTR9 PE=1 SV=1	0.181711	0.0411473	0.211466	no hit	FALSE
CS	A0A0C4DGI3|B4DJV2|O75390	Citrate synthase OS=Homo sapiens GN=CS PE=1 SV=1|Citrate synthase, mitochondrial OS=Homo sapiens GN=CS PE=1 SV=2	0.181653	0.509675	0.747448	no hit	FALSE
USP22	Q9UPT9|Q9UPT9-2	Ubiquitin carboxyl-terminal hydrolase 22 OS=Homo sapiens GN=USP22 PE=1 SV=2|Isoform 2 of Ubiquitin carboxyl-terminal hydrolase 22 OS=Homo sapiens GN=USP22	0.181493	0.101676	0.335159	no hit	FALSE
AP3D1	O14617|O14617-2|O14617-3|O14617-4|O14617-5	AP-3 complex subunit delta-1 OS=Homo sapiens GN=AP3D1 PE=1 SV=1|Isoform 2 of AP-3 complex subunit delta-1 OS=Homo sapiens GN=AP3D1|Isoform 3 of AP-3 complex subunit delta-1 OS=Homo sapiens GN=AP3D1|Isoform 4 of AP-3 complex subunit delta-1 OS=Homo sapiens GN=AP3D1|Isoform 5 of AP-3 complex subunit delta-1 OS=Homo sapiens GN=AP3D1	0.181448	0.0886826	0.312128	no hit	FALSE
HAUS5	O94927	HAUS augmin-like complex subunit 5 OS=Homo sapiens GN=HAUS5 PE=1 SV=2	0.181429	0.242141	0.526423	no hit	FALSE
HAUS6	Q5VY60|Q7Z4H7|Q7Z4H7-3	HAUS augmin-like complex subunit 6 OS=Homo sapiens GN=HAUS6 PE=1 SV=1|HAUS augmin-like complex subunit 6 OS=Homo sapiens GN=HAUS6 PE=1 SV=2|Isoform 3 of HAUS augmin-like complex subunit 6 OS=Homo sapiens GN=HAUS6	0.180853	0.166829	0.438097	no hit	FALSE
ANAPC2	Q9UJX6|Q9UJX6-2	Anaphase-promoting complex subunit 2 OS=Homo sapiens GN=ANAPC2 PE=1 SV=1|Isoform 2 of Anaphase-promoting complex subunit 2 OS=Homo sapiens GN=ANAPC2	0.180673	0.10542	0.342125	no hit	FALSE
PDZRN3	Q9UPQ7	E3 ubiquitin-protein ligase PDZRN3 OS=Homo sapiens GN=PDZRN3 PE=1 SV=2	0.180406	0.302059	0.58769	no hit	FALSE
KCTD10	F5GWA4|Q9H3F6	BTB/POZ domain-containing adapter for CUL3-mediated RhoA degradation protein 3 OS=Homo sapiens GN=KCTD10 PE=1 SV=1	0.180178	0.106551	0.344086	no hit	FALSE
ATP6V0A2	Q8TBM3|Q9Y487	V-type proton ATPase 116 kDa subunit a isoform 2 OS=Homo sapiens GN=ATP6V0A2 PE=1 SV=2|V-type proton ATPase subunit a OS=Homo sapiens GN=ATP6V0A2 PE=1 SV=1	0.179663	0.25822	0.543003	no hit	FALSE
CD2AP	Q9Y5K6	CD2-associated protein OS=Homo sapiens GN=CD2AP PE=1 SV=1	0.179611	0.231893	0.515537	no hit	FALSE
EZR	E7EQR4|P15311	Ezrin OS=Homo sapiens GN=EZR PE=1 SV=3|Ezrin OS=Homo sapiens GN=EZR PE=1 SV=4	0.179457	0.220855	0.504348	no hit	FALSE
ATP6AP2	H0Y750|H7C3E1|O75787|O75787-2	Isoform 2 of Renin receptor OS=Homo sapiens GN=ATP6AP2|Renin receptor (Fragment) OS=Homo sapiens GN=ATP6AP2 PE=1 SV=1|Renin receptor OS=Homo sapiens GN=ATP6AP2 PE=1 SV=2	0.179405	0.161116	0.432758	no hit	FALSE
RSPRY1	Q96DX4	RING finger and SPRY domain-containing protein 1 OS=Homo sapiens GN=RSPRY1 PE=1 SV=1	0.179211	0.16643	0.438097	no hit	FALSE
GTF3C1	Q12789|Q12789-3	General transcription factor 3C polypeptide 1 OS=Homo sapiens GN=GTF3C1 PE=1 SV=4|Isoform 2 of General transcription factor 3C polypeptide 1 OS=Homo sapiens GN=GTF3C1	0.179202	0.0382904	0.202121	no hit	FALSE
ARFGAP1	E5RHC5|E5RHT6|F8VWH9|F8W1U7|Q8N6T3|Q8N6T3-2|Q8N6T3-3|Q8N6T3-4|Q8N6T3-5	ADP-ribosylation factor GTPase-activating protein 1 (Fragment) OS=Homo sapiens GN=ARFGAP1 PE=1 SV=1|ADP-ribosylation factor GTPase-activating protein 1 (Fragment) OS=Homo sapiens GN=ARFGAP1 PE=1 SV=2|ADP-ribosylation factor GTPase-activating protein 1 OS=Homo sapiens GN=ARFGAP1 PE=1 SV=1|ADP-ribosylation factor GTPase-activating protein 1 OS=Homo sapiens GN=ARFGAP1 PE=1 SV=2|Isoform 2 of ADP-ribo…	0.178989	0.165181	0.436967	no hit	FALSE
MORF4L2	A0A0A0MT59|Q15014	Mortality factor 4-like protein 2 OS=Homo sapiens GN=MORF4L2 PE=1 SV=1	0.178455	0.298973	0.586086	no hit	FALSE
CEP78	A8MST6|Q5JTW2|Q5JTW2-2|Q5JTW2-3|Q5JTW2-5	Centrosomal protein of 78 kDa OS=Homo sapiens GN=CEP78 PE=1 SV=2|Centrosomal protein of 78 kDa OS=Homo sapiens GN=CEP78 PE=1 SV=1|Isoform 2 of Centrosomal protein of 78 kDa OS=Homo sapiens GN=CEP78|Isoform 3 of Centrosomal protein of 78 kDa OS=Homo sapiens GN=CEP78|Isoform 4 of Centrosomal protein of 78 kDa OS=Homo sapiens GN=CEP78	0.178211	0.201444	0.482307	no hit	FALSE
HSPA4	P34932	Heat shock 70 kDa protein 4 OS=Homo sapiens GN=HSPA4 PE=1 SV=4	0.178095	0.171659	0.442574	no hit	FALSE
ZNF644	Q9H582|Q9H582-2	Isoform 2 of Zinc finger protein 644 OS=Homo sapiens GN=ZNF644|Zinc finger protein 644 OS=Homo sapiens GN=ZNF644 PE=1 SV=2	0.177278	0.13695	0.394523	no hit	FALSE
CCNH	D6RG18|D6RHI7|P51946	Cyclin-H OS=Homo sapiens GN=CCNH PE=1 SV=1|Cyclin-H OS=Homo sapiens GN=CCNH PE=1 SV=1|Cyclin-H OS=Homo sapiens GN=CCNH PE=1 SV=1	0.176573	0.191585	0.469346	no hit	FALSE
CCDC14	A0A0A0MR27|J3QT39|Q49A88|Q49A88-2|Q49A88-3|Q49A88-5|Q49A88-6	Coiled-coil domain-containing protein 14 OS=Homo sapiens GN=CCDC14 PE=1 SV=1|Coiled-coil domain-containing protein 14 OS=Homo sapiens GN=CCDC14 PE=1 SV=3|Coiled-coil domain containing 14, isoform CRA_c OS=Homo sapiens GN=CCDC14 PE=1 SV=2|Isoform 2 of Coiled-coil domain-containing protein 14 OS=Homo sapiens GN=CCDC14|Isoform 3 of Coiled-coil domain-containing protein 14 OS=Homo sapiens GN=CCDC14|I…	0.175662	0.215219	0.499271	no hit	FALSE
URB1	O60287	Nucleolar pre-ribosomal-associated protein 1 OS=Homo sapiens GN=URB1 PE=1 SV=4	0.175567	0.104726	0.341562	no hit	FALSE
RAD54L2	Q9Y4B4	Helicase ARIP4 OS=Homo sapiens GN=RAD54L2 PE=1 SV=4	0.175276	0.152152	0.417954	no hit	FALSE
USP16	Q9Y5T5|Q9Y5T5-2|Q9Y5T5-3	Ubiquitin carboxyl-terminal hydrolase 16 OS=Homo sapiens GN=USP16 PE=1 SV=1|Isoform 2 of Ubiquitin carboxyl-terminal hydrolase 16 OS=Homo sapiens GN=USP16|Isoform 3 of Ubiquitin carboxyl-terminal hydrolase 16 OS=Homo sapiens GN=USP16	0.175269	0.142345	0.402608	no hit	FALSE
SMPD4	B1PBA3|H7BXF4|H7C2E2|Q9NXE4|Q9NXE4-2|Q9NXE4-4|Q9NXE4-6|Q9NXE4-8	Isoform 2 of Sphingomyelin phosphodiesterase 4 OS=Homo sapiens GN=SMPD4|Isoform 4 of Sphingomyelin phosphodiesterase 4 OS=Homo sapiens GN=SMPD4|Isoform 6 of Sphingomyelin phosphodiesterase 4 OS=Homo sapiens GN=SMPD4|Isoform 8 of Sphingomyelin phosphodiesterase 4 OS=Homo sapiens GN=SMPD4|SKNY protein OS=Homo sapiens GN=SMPD4 PE=1 SV=1|Sphingomyelin phosphodiesterase 4 (Fragment) OS=Homo sapiens GN…	0.175188	0.0933337	0.320408	no hit	FALSE
ANKFY1	Q9P2R3|Q9P2R3-2|Q9P2R3-4	Rabankyrin-5 OS=Homo sapiens GN=ANKFY1 PE=1 SV=2|Isoform 2 of Rabankyrin-5 OS=Homo sapiens GN=ANKFY1|Isoform 4 of Rabankyrin-5 OS=Homo sapiens GN=ANKFY1	0.175032	0.0976275	0.329719	no hit	FALSE
HAX1	O00165|O00165-2|O00165-3|O00165-5	HCLS1-associated protein X-1 OS=Homo sapiens GN=HAX1 PE=1 SV=2|Isoform 2 of HCLS1-associated protein X-1 OS=Homo sapiens GN=HAX1|Isoform 3 of HCLS1-associated protein X-1 OS=Homo sapiens GN=HAX1|Isoform 5 of HCLS1-associated protein X-1 OS=Homo sapiens GN=HAX1	0.174693	0.249283	0.533682	no hit	FALSE
PATJ|INADL	A0A087WUZ6|A0A0X1KG69|Q8NI35|Q8NI35-2|Q8NI35-3|Q8NI35-4	InaD-like protein OS=Homo sapiens GN=PATJ PE=1 SV=1|InaD-like protein OS=Homo sapiens GN=PATJ PE=1 SV=1|InaD-like protein OS=Homo sapiens GN=INADL PE=1 SV=3|Isoform 2 of InaD-like protein OS=Homo sapiens GN=INADL|Isoform 3 of InaD-like protein OS=Homo sapiens GN=INADL|Isoform 4 of InaD-like protein OS=Homo sapiens GN=INADL	0.174435	0.107066	0.345317	no hit	FALSE
DDB1	Q16531|Q16531-2	DNA damage-binding protein 1 OS=Homo sapiens GN=DDB1 PE=1 SV=1|Isoform 2 of DNA damage-binding protein 1 OS=Homo sapiens GN=DDB1	0.174255	0.119864	0.368129	no hit	FALSE
SPG11	Q96JI7|Q96JI7-3	Spatacsin OS=Homo sapiens GN=SPG11 PE=1 SV=3|Isoform 3 of Spatacsin OS=Homo sapiens GN=SPG11	0.173321	0.142185	0.402608	no hit	FALSE
ZNF292	J3KNV1|O60281|O60281-2	Isoform 2 of Zinc finger protein 292 OS=Homo sapiens GN=ZNF292|Zinc finger protein 292 OS=Homo sapiens GN=ZNF292 PE=1 SV=1|Zinc finger protein 292 OS=Homo sapiens GN=ZNF292 PE=1 SV=3	0.173277	0.0964299	0.326761	no hit	FALSE
BTBD1	Q9H0C5|Q9H0C5-2	BTB/POZ domain-containing protein 1 OS=Homo sapiens GN=BTBD1 PE=1 SV=1|Isoform 2 of BTB/POZ domain-containing protein 1 OS=Homo sapiens GN=BTBD1	0.173251	0.167115	0.438097	enriched no hit	FALSE
WRAP73	A0A0A0MRV3|Q9P2S5	WD repeat domain 8, isoform CRA_c OS=Homo sapiens GN=WRAP73 PE=1 SV=1|WD repeat-containing protein WRAP73 OS=Homo sapiens GN=WRAP73 PE=1 SV=1	0.17297	0.295792	0.5827	no hit	FALSE
NBN	A0A0C4DG07|O60934	Nibrin OS=Homo sapiens GN=NBN PE=1 SV=1	0.17288	0.0906145	0.316688	no hit	FALSE
DTL	F5GZ90|Q9NZJ0	Denticleless protein homolog OS=Homo sapiens GN=DTL PE=1 SV=1|Denticleless protein homolog OS=Homo sapiens GN=DTL PE=1 SV=3	0.172832	0.222991	0.508309	no hit	FALSE
C2CD3	Q4AC94|Q4AC94-1|Q4AC94-2|Q4AC94-3|Q4AC94-4	C2 domain-containing protein 3 OS=Homo sapiens GN=C2CD3 PE=1 SV=4|Isoform 1 of C2 domain-containing protein 3 OS=Homo sapiens GN=C2CD3|Isoform 2 of C2 domain-containing protein 3 OS=Homo sapiens GN=C2CD3|Isoform 3 of C2 domain-containing protein 3 OS=Homo sapiens GN=C2CD3|Isoform 4 of C2 domain-containing protein 3 OS=Homo sapiens GN=C2CD3	0.172827	0.283041	0.568427	no hit	FALSE
NRF1	C9JP85|Q16656|Q16656-2|Q16656-4	Nuclear respiratory factor 1 (Fragment) OS=Homo sapiens GN=NRF1 PE=1 SV=7|Nuclear respiratory factor 1 OS=Homo sapiens GN=NRF1 PE=1 SV=1|Isoform Short of Nuclear respiratory factor 1 OS=Homo sapiens GN=NRF1|Isoform 4 of Nuclear respiratory factor 1 OS=Homo sapiens GN=NRF1	0.172618	0.24739	0.532683	no hit	FALSE
BTN2A2	C9IY66|Q8WVV5|Q8WVV5-2	Butyrophilin subfamily 2 member A2 (Fragment) OS=Homo sapiens GN=BTN2A2 PE=1 SV=1|Butyrophilin subfamily 2 member A2 OS=Homo sapiens GN=BTN2A2 PE=1 SV=2|Isoform 2 of Butyrophilin subfamily 2 member A2 OS=Homo sapiens GN=BTN2A2	0.172462	0.151394	0.416962	no hit	FALSE
MAPKAPK2	P49137	MAP kinase-activated protein kinase 2 OS=Homo sapiens GN=MAPKAPK2 PE=1 SV=1	0.172132	0.14053	0.400352	no hit	FALSE
RACK1	J3KPE3|P63244	Receptor of-activated protein C kinase 1 OS=Homo sapiens GN=RACK1 PE=1 SV=1|Receptor of activated protein C kinase 1 OS=Homo sapiens GN=RACK1 PE=1 SV=3	0.171905	0.325857	0.605682	enriched no hit	FALSE
KIN	O60870	DNA/RNA-binding protein KIN17 OS=Homo sapiens GN=KIN PE=1 SV=2	0.171608	0.124601	0.375587	no hit	FALSE
SHPRH	A0A0D9SFM0|Q149N8|Q149N8-4	E3 ubiquitin-protein ligase SHPRH OS=Homo sapiens GN=SHPRH PE=1 SV=1|E3 ubiquitin-protein ligase SHPRH OS=Homo sapiens GN=SHPRH PE=1 SV=2|Isoform 3 of E3 ubiquitin-protein ligase SHPRH OS=Homo sapiens GN=SHPRH	0.171234	0.170716	0.441226	no hit	FALSE
GEMIN4	I3L2C7|P57678	Gem-associated protein 4 OS=Homo sapiens GN=GEMIN4 PE=1 SV=1|Gem-associated protein 4 OS=Homo sapiens GN=GEMIN4 PE=1 SV=2	0.171032	0.335262	0.613265	no hit	FALSE
DGCR14	Q96DF8	Protein DGCR14 OS=Homo sapiens GN=DGCR14 PE=1 SV=1	0.170927	0.166273	0.438097	no hit	FALSE
LRBA	P50851|P50851-2	Isoform 2 of Lipopolysaccharide-responsive and beige-like anchor protein OS=Homo sapiens GN=LRBA|Lipopolysaccharide-responsive and beige-like anchor protein OS=Homo sapiens GN=LRBA PE=1 SV=4	0.170771	0.105406	0.342125	no hit	FALSE
YWHAZ	P63104	14-3-3 protein zeta/delta OS=Homo sapiens GN=YWHAZ PE=1 SV=1	0.170688	0.425231	0.686476	no hit	FALSE
ATP6V0A1	K7EN36|Q93050|Q93050-1|Q93050-3	Isoform 2 of V-type proton ATPase 116 kDa subunit a isoform 1 OS=Homo sapiens GN=ATP6V0A1|Isoform 3 of V-type proton ATPase 116 kDa subunit a isoform 1 OS=Homo sapiens GN=ATP6V0A1|V-type proton ATPase 116 kDa subunit a isoform 1 OS=Homo sapiens GN=ATP6V0A1 PE=1 SV=3|V-type proton ATPase subunit a (Fragment) OS=Homo sapiens GN=ATP6V0A1 PE=1 SV=1	0.170613	0.0745637	0.283829	no hit	FALSE
ATP13A3	H7C1U7|Q9H7F0	Probable cation-transporting ATPase 13A3 (Fragment) OS=Homo sapiens GN=ATP13A3 PE=1 SV=1|Probable cation-transporting ATPase 13A3 OS=Homo sapiens GN=ATP13A3 PE=1 SV=4	0.17044	0.184647	0.461324	no hit	FALSE
PAICS	E9PBS1|P22234|P22234-2	Multifunctional protein ADE2 (Fragment) OS=Homo sapiens GN=PAICS PE=1 SV=1|Multifunctional protein ADE2 OS=Homo sapiens GN=PAICS PE=1 SV=3|Isoform 2 of Multifunctional protein ADE2 OS=Homo sapiens GN=PAICS	0.169969	0.162499	0.434251	no hit	FALSE
HIRA	P54198|P54198-2	Isoform Short of Protein HIRA OS=Homo sapiens GN=HIRA|Protein HIRA OS=Homo sapiens GN=HIRA PE=1 SV=2	0.169787	0.167031	0.438097	no hit	FALSE
CAP1	Q01518|Q01518-2	Adenylyl cyclase-associated protein 1 OS=Homo sapiens GN=CAP1 PE=1 SV=5|Isoform 2 of Adenylyl cyclase-associated protein 1 OS=Homo sapiens GN=CAP1	0.168822	0.430139	0.688398	no hit	FALSE
HSPH1	Q92598|Q92598-2|Q92598-3	Heat shock protein 105 kDa OS=Homo sapiens GN=HSPH1 PE=1 SV=1|Isoform 3 of Heat shock protein 105 kDa OS=Homo sapiens GN=HSPH1|Isoform Beta of Heat shock protein 105 kDa OS=Homo sapiens GN=HSPH1	0.168532	0.128261	0.378999	no hit	FALSE
PIK3R2	O00459	Phosphatidylinositol 3-kinase regulatory subunit beta OS=Homo sapiens GN=PIK3R2 PE=1 SV=2	0.16852	0.28011	0.567859	no hit	FALSE
PIGG	D6RFE8|E7EM50|E7EWV1|Q5H8A4|Q5H8A4-2|Q5H8A4-4|Q5H8A4-5|Q5H8A4-6	GPI ethanolamine phosphate transferase 2 OS=Homo sapiens GN=PIGG PE=1 SV=1|Isoform 2 of GPI ethanolamine phosphate transferase 2 OS=Homo sapiens GN=PIGG|Isoform 4 of GPI ethanolamine phosphate transferase 2 OS=Homo sapiens GN=PIGG|Isoform 5 of GPI ethanolamine phosphate transferase 2 OS=Homo sapiens GN=PIGG|Isoform 6 of GPI ethanolamine phosphate transferase 2 OS=Homo sapiens GN=PIGG	0.167901	0.209352	0.492135	no hit	FALSE
PIK3C2B	F5GWN5|O00750	Phosphatidylinositol 4-phosphate 3-kinase C2 domain-containing subunit beta OS=Homo sapiens GN=PIK3C2B PE=1 SV=1|Phosphatidylinositol 4-phosphate 3-kinase C2 domain-containing subunit beta OS=Homo sapiens GN=PIK3C2B PE=1 SV=2	0.167609	0.121097	0.368678	no hit	FALSE
COPB2	P35606|P35606-2	Coatomer subunit beta' OS=Homo sapiens GN=COPB2 PE=1 SV=2|Isoform 2 of Coatomer subunit beta' OS=Homo sapiens GN=COPB2	0.167278	0.110833	0.351363	no hit	FALSE
FUBP3	Q96I24	Far upstream element-binding protein 3 OS=Homo sapiens GN=FUBP3 PE=1 SV=2	0.167012	0.368606	0.640502	no hit	FALSE
TET1	Q8NFU7	Methylcytosine dioxygenase TET1 OS=Homo sapiens GN=TET1 PE=1 SV=2	0.166844	0.110467	0.350554	no hit	FALSE
HSDL1	Q3SXM5	Inactive hydroxysteroid dehydrogenase-like protein 1 OS=Homo sapiens GN=HSDL1 PE=1 SV=3	0.166694	0.117115	0.362515	no hit	FALSE
HERC1	Q15751	Probable E3 ubiquitin-protein ligase HERC1 OS=Homo sapiens GN=HERC1 PE=1 SV=2	0.16646	0.2304	0.515206	no hit	FALSE
ERBB2IP	Q96RT1|Q96RT1-2|Q96RT1-3|Q96RT1-5|Q96RT1-6|Q96RT1-7|Q96RT1-8|Q96RT1-9	Isoform 2 of Protein LAP2 OS=Homo sapiens GN=ERBB2IP|Isoform 3 of Protein LAP2 OS=Homo sapiens GN=ERBB2IP|Isoform 5 of Protein LAP2 OS=Homo sapiens GN=ERBB2IP|Isoform 6 of Protein LAP2 OS=Homo sapiens GN=ERBB2IP|Isoform 7 of Protein LAP2 OS=Homo sapiens GN=ERBB2IP|Isoform 8 of Protein LAP2 OS=Homo sapiens GN=ERBB2IP|Isoform 9 of Protein LAP2 OS=Homo sapiens GN=ERBB2IP|Protein LAP2 OS=Homo sapiens…	0.166457	0.0790232	0.291361	no hit	FALSE
MAGED1	Q9Y5V3|Q9Y5V3-2	Melanoma-associated antigen D1 OS=Homo sapiens GN=MAGED1 PE=1 SV=3|Isoform 2 of Melanoma-associated antigen D1 OS=Homo sapiens GN=MAGED1	0.166309	0.281443	0.567937	enriched no hit	FALSE
ATP1A1	P05023|P05023-4	Sodium/potassium-transporting ATPase subunit alpha-1 OS=Homo sapiens GN=ATP1A1 PE=1 SV=1|Isoform 4 of Sodium/potassium-transporting ATPase subunit alpha-1 OS=Homo sapiens GN=ATP1A1	0.166077	0.140304	0.400068	no hit	FALSE
BAP1	F8W6N3|Q92560	Ubiquitin carboxyl-terminal hydrolase BAP1 OS=Homo sapiens GN=BAP1 PE=1 SV=2|Ubiquitin carboxyl-terminal hydrolase OS=Homo sapiens GN=BAP1 PE=1 SV=1	0.165874	0.272485	0.560608	no hit	FALSE
DYNC2H1	Q8NCM8|Q8NCM8-2	Cytoplasmic dynein 2 heavy chain 1 OS=Homo sapiens GN=DYNC2H1 PE=1 SV=4|Isoform 2 of Cytoplasmic dynein 2 heavy chain 1 OS=Homo sapiens GN=DYNC2H1	0.165614	0.124908	0.375918	no hit	FALSE
LRSAM1	Q6UWE0|Q6UWE0-2	E3 ubiquitin-protein ligase LRSAM1 OS=Homo sapiens GN=LRSAM1 PE=1 SV=1|Isoform 2 of E3 ubiquitin-protein ligase LRSAM1 OS=Homo sapiens GN=LRSAM1	0.165522	0.0903859	0.316502	no hit	FALSE
PRPF39	Q86UA1	Pre-mRNA-processing factor 39 OS=Homo sapiens GN=PRPF39 PE=1 SV=3	0.165099	0.0929746	0.319873	no hit	FALSE
SHTN1	A0MZ66|A0MZ66-2|A0MZ66-3|A0MZ66-4|A0MZ66-5|A0MZ66-6|A0MZ66-8	Isoform 2 of Shootin-1 OS=Homo sapiens GN=SHTN1|Isoform 3 of Shootin-1 OS=Homo sapiens GN=SHTN1|Isoform 4 of Shootin-1 OS=Homo sapiens GN=SHTN1|Isoform 5 of Shootin-1 OS=Homo sapiens GN=SHTN1|Isoform 6 of Shootin-1 OS=Homo sapiens GN=SHTN1|Isoform 8 of Shootin-1 OS=Homo sapiens GN=SHTN1|Shootin-1 OS=Homo sapiens GN=SHTN1 PE=1 SV=4	0.164605	0.282736	0.568427	no hit	FALSE
NUP133	Q8WUM0	Nuclear pore complex protein Nup133 OS=Homo sapiens GN=NUP133 PE=1 SV=2	0.164245	0.0844626	0.303525	no hit	FALSE
FAM91A1	E7ER68|Q658Y4	Protein FAM91A1 OS=Homo sapiens GN=FAM91A1 PE=1 SV=1|Protein FAM91A1 OS=Homo sapiens GN=FAM91A1 PE=1 SV=3	0.163989	0.25128	0.536292	no hit	FALSE
HELZ	J3QS41|P42694	Probable helicase with zinc finger domain OS=Homo sapiens GN=HELZ PE=1 SV=1|Probable helicase with zinc finger domain OS=Homo sapiens GN=HELZ PE=1 SV=2	0.163862	0.1224	0.370852	no hit	FALSE
DLGAP5	Q15398|Q15398-3	Disks large-associated protein 5 OS=Homo sapiens GN=DLGAP5 PE=1 SV=2|Isoform 3 of Disks large-associated protein 5 OS=Homo sapiens GN=DLGAP5	0.163573	0.17977	0.453822	no hit	FALSE
CNOT1	A5YKK6|A5YKK6-2	CCR4-NOT transcription complex subunit 1 OS=Homo sapiens GN=CNOT1 PE=1 SV=2|Isoform 2 of CCR4-NOT transcription complex subunit 1 OS=Homo sapiens GN=CNOT1	0.162932	0.193609	0.471248	no hit	FALSE
AUP1	Q9Y679|Q9Y679-2	Ancient ubiquitous protein 1 OS=Homo sapiens GN=AUP1 PE=1 SV=1|Isoform Short of Ancient ubiquitous protein 1 OS=Homo sapiens GN=AUP1	0.162752	0.168558	0.44025	no hit	FALSE
DOCK1	A0A096LNH6|Q14185	Dedicator of cytokinesis protein 1 OS=Homo sapiens GN=DOCK1 PE=1 SV=1|Dedicator of cytokinesis protein 1 OS=Homo sapiens GN=DOCK1 PE=1 SV=2	0.162611	0.164765	0.436966	no hit	FALSE
EPN1	Q9Y6I3|Q9Y6I3-1|Q9Y6I3-3	Epsin-1 OS=Homo sapiens GN=EPN1 PE=1 SV=2|Isoform 2 of Epsin-1 OS=Homo sapiens GN=EPN1|Isoform 3 of Epsin-1 OS=Homo sapiens GN=EPN1	0.162398	0.280218	0.567859	no hit	FALSE
GPRASP2	Q96D09	G-protein coupled receptor-associated sorting protein 2 OS=Homo sapiens GN=GPRASP2 PE=1 SV=1	0.162098	0.226269	0.510607	no hit	FALSE
UBR5	E7EMW7|O95071|O95071-2	E3 ubiquitin-protein ligase UBR5 OS=Homo sapiens GN=UBR5 PE=1 SV=1|E3 ubiquitin-protein ligase UBR5 OS=Homo sapiens GN=UBR5 PE=1 SV=2|Isoform 2 of E3 ubiquitin-protein ligase UBR5 OS=Homo sapiens GN=UBR5	0.161851	0.400702	0.663427	no hit	FALSE
RPS8	P62241|Q5JR95	40S ribosomal protein S8 OS=Homo sapiens GN=RPS8 PE=1 SV=2|40S ribosomal protein S8 OS=Homo sapiens GN=RPS8 PE=1 SV=1	0.161747	0.105906	0.342743	no hit	FALSE
RBM4	Q9BWF3	RNA-binding protein 4 OS=Homo sapiens GN=RBM4 PE=1 SV=1	0.161507	0.306335	0.589451	no hit	FALSE
KPNA2	P52292	Importin subunit alpha-1 OS=Homo sapiens GN=KPNA2 PE=1 SV=1	0.161429	0.0867478	0.307525	no hit	FALSE
PPP2R1A	B3KQV6|P30153	Serine/threonine-protein phosphatase 2A 65 kDa regulatory subunit A alpha isoform OS=Homo sapiens GN=PPP2R1A PE=1 SV=1|Serine/threonine-protein phosphatase 2A 65 kDa regulatory subunit A alpha isoform OS=Homo sapiens GN=PPP2R1A PE=1 SV=4	0.161223	0.449522	0.703941	no hit	FALSE
ARMCX5	Q6P1M9	Armadillo repeat-containing X-linked protein 5 OS=Homo sapiens GN=ARMCX5 PE=1 SV=1	0.160932	0.308778	0.590815	enriched no hit	FALSE
SGSM3	Q96HU1|Q96HU1-2	Small G protein signaling modulator 3 OS=Homo sapiens GN=SGSM3 PE=1 SV=1|Isoform 2 of Small G protein signaling modulator 3 OS=Homo sapiens GN=SGSM3	0.160809	0.423957	0.685121	no hit	FALSE
ANKLE2	Q86XL3|Q86XL3-3	Ankyrin repeat and LEM domain-containing protein 2 OS=Homo sapiens GN=ANKLE2 PE=1 SV=4|Isoform 3 of Ankyrin repeat and LEM domain-containing protein 2 OS=Homo sapiens GN=ANKLE2	0.160672	0.091999	0.318091	no hit	FALSE
ALG13	Q9NP73|Q9NP73-3|Q9NP73-4	Isoform 3 of Putative bifunctional UDP-N-acetylglucosamine transferase and deubiquitinase ALG13 OS=Homo sapiens GN=ALG13|Isoform 4 of Putative bifunctional UDP-N-acetylglucosamine transferase and deubiquitinase ALG13 OS=Homo sapiens GN=ALG13|Putative bifunctional UDP-N-acetylglucosamine transferase and deubiquitinase ALG13 OS=Homo sapiens GN=ALG13 PE=1 SV=2	0.160588	0.264522	0.550738	no hit	FALSE
ANKRD13B	Q86YJ7|Q86YJ7-2	Ankyrin repeat domain-containing protein 13B OS=Homo sapiens GN=ANKRD13B PE=1 SV=4|Isoform 2 of Ankyrin repeat domain-containing protein 13B OS=Homo sapiens GN=ANKRD13B	0.160471	0.0888188	0.312128	no hit	FALSE
TRAF4	Q2KJU6|Q9BUZ4	TNF receptor-associated factor 4 OS=Homo sapiens GN=TRAF4 PE=1 SV=1	0.160468	0.137174	0.394523	no hit	FALSE
DNMT1	P26358|P26358-2	DNA (cytosine-5)-methyltransferase 1 OS=Homo sapiens GN=DNMT1 PE=1 SV=2|Isoform 2 of DNA (cytosine-5)-methyltransferase 1 OS=Homo sapiens GN=DNMT1	0.160437	0.0839946	0.302189	no hit	FALSE
RBCK1	Q9BYM8|Q9BYM8-3	RanBP-type and C3HC4-type zinc finger-containing protein 1 OS=Homo sapiens GN=RBCK1 PE=1 SV=2|Isoform 2 of RanBP-type and C3HC4-type zinc finger-containing protein 1 OS=Homo sapiens GN=RBCK1	0.160411	0.332771	0.611537	no hit	FALSE
ATL2	Q8NHH9|Q8NHH9-3|Q8NHH9-5	Atlastin-2 OS=Homo sapiens GN=ATL2 PE=1 SV=2|Isoform 3 of Atlastin-2 OS=Homo sapiens GN=ATL2|Isoform 5 of Atlastin-2 OS=Homo sapiens GN=ATL2	0.160067	0.108557	0.345513	no hit	FALSE
RECQL	P46063	ATP-dependent DNA helicase Q1 OS=Homo sapiens GN=RECQL PE=1 SV=3	0.159764	0.17134	0.442406	no hit	FALSE
PTK7	Q13308|Q13308-2|Q13308-3|Q13308-4|Q13308-6	Inactive tyrosine-protein kinase 7 OS=Homo sapiens GN=PTK7 PE=1 SV=2|Isoform 2 of Inactive tyrosine-protein kinase 7 OS=Homo sapiens GN=PTK7|Isoform 3 of Inactive tyrosine-protein kinase 7 OS=Homo sapiens GN=PTK7|Isoform 4 of Inactive tyrosine-protein kinase 7 OS=Homo sapiens GN=PTK7|Isoform 6 of Inactive tyrosine-protein kinase 7 OS=Homo sapiens GN=PTK7	0.159681	0.137481	0.394523	no hit	FALSE
TTC14	Q96N46|Q96N46-2|Q96N46-3	Isoform 2 of Tetratricopeptide repeat protein 14 OS=Homo sapiens GN=TTC14|Isoform 3 of Tetratricopeptide repeat protein 14 OS=Homo sapiens GN=TTC14|Tetratricopeptide repeat protein 14 OS=Homo sapiens GN=TTC14 PE=1 SV=1	0.159447	0.246885	0.532401	no hit	FALSE
ATR	Q13535|Q13535-2|Q13535-3	Isoform 2 of Serine/threonine-protein kinase ATR OS=Homo sapiens GN=ATR|Isoform 3 of Serine/threonine-protein kinase ATR OS=Homo sapiens GN=ATR|Serine/threonine-protein kinase ATR OS=Homo sapiens GN=ATR PE=1 SV=3	0.159035	0.126759	0.378039	no hit	FALSE
SMCHD1	A6NHR9|A6NHR9-2	Isoform 2 of Structural maintenance of chromosomes flexible hinge domain-containing protein 1 OS=Homo sapiens GN=SMCHD1|Structural maintenance of chromosomes flexible hinge domain-containing protein 1 OS=Homo sapiens GN=SMCHD1 PE=1 SV=2	0.159017	0.0672828	0.269337	no hit	FALSE
CRY1	Q16526	Cryptochrome-1 OS=Homo sapiens GN=CRY1 PE=1 SV=1	0.158913	0.284912	0.570187	no hit	FALSE
PPP6R1	Q9UPN7	Serine/threonine-protein phosphatase 6 regulatory subunit 1 OS=Homo sapiens GN=PPP6R1 PE=1 SV=5	0.158687	0.413568	0.675966	no hit	FALSE
DAPK3	O43293	Death-associated protein kinase 3 OS=Homo sapiens GN=DAPK3 PE=1 SV=1	0.158297	0.318713	0.600065	no hit	FALSE
POLR1E	Q9GZS1|Q9GZS1-2	DNA-directed RNA polymerase I subunit RPA49 OS=Homo sapiens GN=POLR1E PE=1 SV=2|Isoform 2 of DNA-directed RNA polymerase I subunit RPA49 OS=Homo sapiens GN=POLR1E	0.158101	0.167461	0.438576	no hit	FALSE
OBSL1	A6NN50|O75147|O75147-1|O75147-2|O75147-4	Obscurin-like protein 1 OS=Homo sapiens GN=OBSL1 PE=1 SV=1|Obscurin-like protein 1 OS=Homo sapiens GN=OBSL1 PE=1 SV=4|Isoform 3 of Obscurin-like protein 1 OS=Homo sapiens GN=OBSL1|Isoform 2 of Obscurin-like protein 1 OS=Homo sapiens GN=OBSL1|Isoform 4 of Obscurin-like protein 1 OS=Homo sapiens GN=OBSL1	0.157547	0.125822	0.377587	no hit	FALSE
MTR	Q99707|Q99707-2	Isoform 2 of Methionine synthase OS=Homo sapiens GN=MTR|Methionine synthase OS=Homo sapiens GN=MTR PE=1 SV=2	0.157448	0.346107	0.624024	no hit	FALSE
EXOC2	Q96KP1	Exocyst complex component 2 OS=Homo sapiens GN=EXOC2 PE=1 SV=1	0.157267	0.165138	0.436967	no hit	FALSE
HDAC6	A6NDI8|E7EPS2|Q9UBN7	Histone deacetylase 6 (Fragment) OS=Homo sapiens GN=HDAC6 PE=1 SV=1|Histone deacetylase 6 OS=Homo sapiens GN=HDAC6 PE=1 SV=2	0.157128	0.440625	0.69773	no hit	FALSE
STAG2	Q8N3U4|Q8N3U4-2	Cohesin subunit SA-2 OS=Homo sapiens GN=STAG2 PE=1 SV=3|Isoform 2 of Cohesin subunit SA-2 OS=Homo sapiens GN=STAG2	0.156711	0.160775	0.43263	no hit	FALSE
MKL2	Q9ULH7|Q9ULH7-4|Q9ULH7-5	Isoform 4 of MKL/myocardin-like protein 2 OS=Homo sapiens GN=MKL2|Isoform 5 of MKL/myocardin-like protein 2 OS=Homo sapiens GN=MKL2|MKL/myocardin-like protein 2 OS=Homo sapiens GN=MKL2 PE=1 SV=3	0.15671	0.129281	0.381064	no hit	FALSE
STX12	B1AJQ6|Q86Y82	Syntaxin-12 (Fragment) OS=Homo sapiens GN=STX12 PE=1 SV=2|Syntaxin-12 OS=Homo sapiens GN=STX12 PE=1 SV=1	0.156638	0.241905	0.526274	no hit	FALSE
QTRTD1	Q9H974|Q9H974-2|Q9H974-3|Q9H974-4	Isoform 2 of Queuine tRNA-ribosyltransferase subunit QTRTD1 OS=Homo sapiens GN=QTRTD1|Isoform 3 of Queuine tRNA-ribosyltransferase subunit QTRTD1 OS=Homo sapiens GN=QTRTD1|Isoform 4 of Queuine tRNA-ribosyltransferase subunit QTRTD1 OS=Homo sapiens GN=QTRTD1|Queuine tRNA-ribosyltransferase subunit QTRTD1 OS=Homo sapiens GN=QTRTD1 PE=1 SV=1	0.156284	0.203518	0.483255	no hit	FALSE
DCUN1D5	E9PM04|H0YCN4|Q9BTE7	DCN1-like protein (Fragment) OS=Homo sapiens GN=DCUN1D5 PE=1 SV=1|DCN1-like protein 5 OS=Homo sapiens GN=DCUN1D5 PE=1 SV=1|DCN1-like protein OS=Homo sapiens GN=DCUN1D5 PE=1 SV=1	0.156217	0.237363	0.522165	no hit	FALSE
CDC27	G5EA36|P30260|P30260-2	Cell division cycle 27, isoform CRA_c OS=Homo sapiens GN=CDC27 PE=1 SV=1|Cell division cycle protein 27 homolog OS=Homo sapiens GN=CDC27 PE=1 SV=2|Isoform 2 of Cell division cycle protein 27 homolog OS=Homo sapiens GN=CDC27	0.156119	0.0808055	0.29613	no hit	FALSE
WDR75	Q8IWA0	WD repeat-containing protein 75 OS=Homo sapiens GN=WDR75 PE=1 SV=1	0.155806	0.150723	0.415477	no hit	FALSE
WIZ	B9EGQ5|M0QXA7|O95785|O95785-2|O95785-3|O95785-4	Isoform 2 of Protein Wiz OS=Homo sapiens GN=WIZ|Isoform 3 of Protein Wiz OS=Homo sapiens GN=WIZ|Isoform 4 of Protein Wiz OS=Homo sapiens GN=WIZ|Protein Wiz OS=Homo sapiens GN=WIZ PE=1 SV=1|Protein Wiz OS=Homo sapiens GN=WIZ PE=1 SV=2	0.155802	0.132674	0.387743	no hit	FALSE
THOC2	A0A0C4DG98|Q8NI27	THO complex subunit 2 OS=Homo sapiens GN=THOC2 PE=1 SV=1|THO complex subunit 2 OS=Homo sapiens GN=THOC2 PE=1 SV=2	0.155581	0.148366	0.41282	no hit	FALSE
UCK2	Q9BZX2	Uridine-cytidine kinase 2 OS=Homo sapiens GN=UCK2 PE=1 SV=1	0.155581	0.280322	0.567859	no hit	FALSE
NGLY1	A0A0C4DFP4|Q96IV0|Q96IV0-2|Q96IV0-3|Q96IV0-5	Isoform 2 of Peptide-N(4)-(N-acetyl-beta-glucosaminyl)asparagine amidase OS=Homo sapiens GN=NGLY1|Isoform 3 of Peptide-N(4)-(N-acetyl-beta-glucosaminyl)asparagine amidase OS=Homo sapiens GN=NGLY1|Isoform 5 of Peptide-N(4)-(N-acetyl-beta-glucosaminyl)asparagine amidase OS=Homo sapiens GN=NGLY1|Peptide-N(4)-(N-acetyl-beta-glucosaminyl)asparagine amidase (Fragment) OS=Homo sapiens GN=NGLY1 PE=1 SV=1…	0.155468	0.0992254	0.331594	no hit	FALSE
LARS	Q9P2J5	Leucine--tRNA ligase, cytoplasmic OS=Homo sapiens GN=LARS PE=1 SV=2	0.155332	0.0991639	0.331594	no hit	FALSE
HELLS	A0A0B4J1V9|F6XU50|Q9NRZ9|Q9NRZ9-2|Q9NRZ9-3|Q9NRZ9-5|Q9NRZ9-6	Helicase, lymphoid-specific, isoform CRA_b OS=Homo sapiens GN=HELLS PE=1 SV=1|Helicase, lymphoid-specific, isoform CRA_l OS=Homo sapiens GN=HELLS PE=1 SV=1|Isoform 2 of Lymphoid-specific helicase OS=Homo sapiens GN=HELLS|Isoform 3 of Lymphoid-specific helicase OS=Homo sapiens GN=HELLS|Isoform 5 of Lymphoid-specific helicase OS=Homo sapiens GN=HELLS|Isoform 6 of Lymphoid-specific helicase OS=Homo …	0.155287	0.0831106	0.301269	no hit	FALSE
RUFY1	Q96T51|Q96T51-2	Isoform 2 of RUN and FYVE domain-containing protein 1 OS=Homo sapiens GN=RUFY1|RUN and FYVE domain-containing protein 1 OS=Homo sapiens GN=RUFY1 PE=1 SV=2	0.154906	0.112891	0.354319	no hit	FALSE
CUX1	P39880|P39880-2|P39880-3|P39880-4|P39880-5|P39880-6|P39880-9|Q13948|Q13948-10|Q13948-2|Q13948-9	Homeobox protein cut-like 1 OS=Homo sapiens GN=CUX1 PE=1 SV=3|Isoform 10 of Protein CASP OS=Homo sapiens GN=CUX1|Isoform 11 of Homeobox protein cut-like 1 OS=Homo sapiens GN=CUX1|Isoform 2 of Homeobox protein cut-like 1 OS=Homo sapiens GN=CUX1|Isoform 3 of Homeobox protein cut-like 1 OS=Homo sapiens GN=CUX1|Isoform 5 of Homeobox protein cut-like 1 OS=Homo sapiens GN=CUX1|Isoform 6 of Homeobox pro…	0.154822	0.209726	0.492135	no hit	FALSE
PCNA	P12004	Proliferating cell nuclear antigen OS=Homo sapiens GN=PCNA PE=1 SV=1	0.154381	0.400728	0.663427	no hit	FALSE
KDM5C	P41229|P41229-2|P41229-5	Lysine-specific demethylase 5C OS=Homo sapiens GN=KDM5C PE=1 SV=2|Isoform 2 of Lysine-specific demethylase 5C OS=Homo sapiens GN=KDM5C|Isoform 5 of Lysine-specific demethylase 5C OS=Homo sapiens GN=KDM5C	0.154359	0.230153	0.515206	no hit	FALSE
VPS51	Q9UID3	Vacuolar protein sorting-associated protein 51 homolog OS=Homo sapiens GN=VPS51 PE=1 SV=2	0.154326	0.246017	0.531544	no hit	FALSE
SLC4A7	Q9Y6M7-13|Q9Y6M7-6|Q9Y6M7-7|Q9Y6M7-8	Isoform 13 of Sodium bicarbonate cotransporter 3 OS=Homo sapiens GN=SLC4A7|Isoform 6 of Sodium bicarbonate cotransporter 3 OS=Homo sapiens GN=SLC4A7|Isoform 7 of Sodium bicarbonate cotransporter 3 OS=Homo sapiens GN=SLC4A7|Isoform 8 of Sodium bicarbonate cotransporter 3 OS=Homo sapiens GN=SLC4A7	0.154298	0.255377	0.540636	no hit	FALSE
ATP2B4	P23634|P23634-6|P23634-7|P23634-8	Plasma membrane calcium-transporting ATPase 4 OS=Homo sapiens GN=ATP2B4 PE=1 SV=2|Isoform XB of Plasma membrane calcium-transporting ATPase 4 OS=Homo sapiens GN=ATP2B4|Isoform ZB of Plasma membrane calcium-transporting ATPase 4 OS=Homo sapiens GN=ATP2B4|Isoform ZD of Plasma membrane calcium-transporting ATPase 4 OS=Homo sapiens GN=ATP2B4	0.153795	0.186182	0.461957	no hit	FALSE
NDC1	Q9BTX1|Q9BTX1-2|Q9BTX1-4|Q9BTX1-5|Q9BTX1-6	Isoform 2 of Nucleoporin NDC1 OS=Homo sapiens GN=NDC1|Isoform 4 of Nucleoporin NDC1 OS=Homo sapiens GN=NDC1|Isoform 5 of Nucleoporin NDC1 OS=Homo sapiens GN=NDC1|Isoform 6 of Nucleoporin NDC1 OS=Homo sapiens GN=NDC1|Nucleoporin NDC1 OS=Homo sapiens GN=NDC1 PE=1 SV=2	0.153572	0.303653	0.588991	no hit	FALSE
BCORL1	A0A075B6Q3|Q5H9F3|Q5H9F3-3	BCL-6 corepressor-like protein 1 (Fragment) OS=Homo sapiens GN=BCORL1 PE=1 SV=1|BCL-6 corepressor-like protein 1 OS=Homo sapiens GN=BCORL1 PE=1 SV=1|Isoform 3 of BCL-6 corepressor-like protein 1 OS=Homo sapiens GN=BCORL1	0.152386	0.278079	0.56663	no hit	FALSE
PARG	Q86W56|Q86W56-2|Q86W56-3	Poly(ADP-ribose) glycohydrolase OS=Homo sapiens GN=PARG PE=1 SV=1|Isoform 2 of Poly(ADP-ribose) glycohydrolase OS=Homo sapiens GN=PARG|Isoform 3 of Poly(ADP-ribose) glycohydrolase OS=Homo sapiens GN=PARG	0.152087	0.237032	0.521802	no hit	FALSE
DCTN1	E7EX90|Q14203|Q14203-2|Q14203-3|Q14203-4|Q14203-5|Q14203-6	Dynactin subunit 1 OS=Homo sapiens GN=DCTN1 PE=1 SV=1|Dynactin subunit 1 OS=Homo sapiens GN=DCTN1 PE=1 SV=3|Isoform 3 of Dynactin subunit 1 OS=Homo sapiens GN=DCTN1|Isoform 4 of Dynactin subunit 1 OS=Homo sapiens GN=DCTN1|Isoform 5 of Dynactin subunit 1 OS=Homo sapiens GN=DCTN1|Isoform 6 of Dynactin subunit 1 OS=Homo sapiens GN=DCTN1|Isoform p135 of Dynactin subunit 1 OS=Homo sapiens GN=DCTN1	0.151737	0.295103	0.581705	no hit	FALSE
KIF2C	Q99661|Q99661-2	Kinesin-like protein KIF2C OS=Homo sapiens GN=KIF2C PE=1 SV=2|Isoform 2 of Kinesin-like protein KIF2C OS=Homo sapiens GN=KIF2C	0.151362	0.17335	0.445035	no hit	FALSE
GTF2I	P78347|P78347-2|P78347-3|P78347-4	General transcription factor II-I OS=Homo sapiens GN=GTF2I PE=1 SV=2|Isoform 2 of General transcription factor II-I OS=Homo sapiens GN=GTF2I|Isoform 3 of General transcription factor II-I OS=Homo sapiens GN=GTF2I|Isoform 4 of General transcription factor II-I OS=Homo sapiens GN=GTF2I	0.151035	0.12691	0.378039	no hit	FALSE
FBXO3	E9PJM3|Q9UK99|Q9UK99-2|Q9UK99-3	F-box only protein 3 OS=Homo sapiens GN=FBXO3 PE=1 SV=1|F-box only protein 3 OS=Homo sapiens GN=FBXO3 PE=1 SV=3|Isoform 2 of F-box only protein 3 OS=Homo sapiens GN=FBXO3|Isoform 3 of F-box only protein 3 OS=Homo sapiens GN=FBXO3	0.150995	0.166193	0.438097	enriched no hit	FALSE
GJA1	P17302	Gap junction alpha-1 protein OS=Homo sapiens GN=GJA1 PE=1 SV=2	0.150468	0.233175	0.517655	no hit	FALSE
POLR2C	P19387	DNA-directed RNA polymerase II subunit RPB3 OS=Homo sapiens GN=POLR2C PE=1 SV=2	0.150458	0.305534	0.588991	enriched no hit	FALSE
DIP2B	Q9P265	Disco-interacting protein 2 homolog B OS=Homo sapiens GN=DIP2B PE=1 SV=3	0.150094	0.18506	0.461957	no hit	FALSE
HELZ2	Q9BYK8|Q9BYK8-2|Q9BYK8-4	Helicase with zinc finger domain 2 OS=Homo sapiens GN=HELZ2 PE=1 SV=6|Isoform 2 of Helicase with zinc finger domain 2 OS=Homo sapiens GN=HELZ2|Isoform 3 of Helicase with zinc finger domain 2 OS=Homo sapiens GN=HELZ2	0.150078	0.373356	0.642856	no hit	FALSE
VANGL2	Q9ULK5	Vang-like protein 2 OS=Homo sapiens GN=VANGL2 PE=1 SV=2	0.149868	0.412524	0.674611	no hit	FALSE
WDR41	H0YAA3|Q9HAD4	WD repeat-containing protein 41 (Fragment) OS=Homo sapiens GN=WDR41 PE=1 SV=1|WD repeat-containing protein 41 OS=Homo sapiens GN=WDR41 PE=2 SV=3	0.149622	0.126538	0.378039	no hit	FALSE
TOM1L2	B7Z2U2|Q6ZVM7|Q6ZVM7-2|Q6ZVM7-3|Q6ZVM7-5	Isoform 2 of TOM1-like protein 2 OS=Homo sapiens GN=TOM1L2|Isoform 3 of TOM1-like protein 2 OS=Homo sapiens GN=TOM1L2|Isoform 5 of TOM1-like protein 2 OS=Homo sapiens GN=TOM1L2|TOM1-like protein 2 OS=Homo sapiens GN=TOM1L2 PE=1 SV=1	0.149407	0.45626	0.708989	no hit	FALSE
MAP1B	P46821	Microtubule-associated protein 1B OS=Homo sapiens GN=MAP1B PE=1 SV=2	0.149355	0.329258	0.606497	no hit	FALSE
ARF5	P84085	ADP-ribosylation factor 5 OS=Homo sapiens GN=ARF5 PE=1 SV=2	0.149267	0.187128	0.462748	no hit	FALSE
TRIM24	A0A087X1V3|O15164|O15164-2	Transcription intermediary factor 1-alpha OS=Homo sapiens GN=TRIM24 PE=1 SV=1|Transcription intermediary factor 1-alpha OS=Homo sapiens GN=TRIM24 PE=1 SV=3|Isoform Short of Transcription intermediary factor 1-alpha OS=Homo sapiens GN=TRIM24	0.149181	0.216312	0.500294	no hit	FALSE
NCAPG2	H0Y6U5|Q86XI2|Q86XI2-2	Condensin-2 complex subunit G2 (Fragment) OS=Homo sapiens GN=NCAPG2 PE=1 SV=1|Condensin-2 complex subunit G2 OS=Homo sapiens GN=NCAPG2 PE=1 SV=1|Isoform 2 of Condensin-2 complex subunit G2 OS=Homo sapiens GN=NCAPG2	0.148837	0.235773	0.519803	no hit	FALSE
PPP2R3B	A0A0G2JN52|A0A0G2JNR6|Q9Y5P8	Serine/threonine-protein phosphatase 2A regulatory subunit B'' subunit beta OS=Homo sapiens GN=PPP2R3B PE=1 SV=1|Serine/threonine-protein phosphatase 2A regulatory subunit B'' subunit beta OS=Homo sapiens GN=PPP2R3B PE=1 SV=1|Serine/threonine-protein phosphatase 2A regulatory subunit B'' subunit beta OS=Homo sapiens GN=PPP2R3B PE=1 SV=2	0.14873	0.241786	0.526274	no hit	FALSE
SHCBP1	Q8NEM2	SHC SH2 domain-binding protein 1 OS=Homo sapiens GN=SHCBP1 PE=1 SV=3	0.148551	0.154337	0.420353	no hit	FALSE
DDX39B	A0A0G2JJZ9|H0Y400|Q13838|Q13838-2	Isoform 2 of Spliceosome RNA helicase DDX39B OS=Homo sapiens GN=DDX39B|Spliceosome RNA helicase DDX39B (Fragment) OS=Homo sapiens GN=DDX39B PE=1 SV=1|Spliceosome RNA helicase DDX39B OS=Homo sapiens GN=DDX39B PE=1 SV=1	0.148538	0.212294	0.496509	no hit	FALSE
WDR44	Q5JSH3|Q5JSH3-2|Q5JSH3-4	Isoform 2 of WD repeat-containing protein 44 OS=Homo sapiens GN=WDR44|Isoform 4 of WD repeat-containing protein 44 OS=Homo sapiens GN=WDR44|WD repeat-containing protein 44 OS=Homo sapiens GN=WDR44 PE=1 SV=1	0.148026	0.12801	0.378999	no hit	FALSE
CEP170	H0Y2V6|Q5SW79	Centrosomal protein of 170 kDa (Fragment) OS=Homo sapiens GN=CEP170 PE=1 SV=1|Centrosomal protein of 170 kDa OS=Homo sapiens GN=CEP170 PE=1 SV=1	0.14712	0.282763	0.568427	no hit	FALSE
AP2M1	A0A087WY71|C9JTK4|E9PFW3|Q96CW1|Q96CW1-2	AP-2 complex subunit mu (Fragment) OS=Homo sapiens GN=AP2M1 PE=1 SV=1|AP-2 complex subunit mu OS=Homo sapiens GN=AP2M1 PE=1 SV=1|AP-2 complex subunit mu OS=Homo sapiens GN=AP2M1 PE=1 SV=2|Isoform 2 of AP-2 complex subunit mu OS=Homo sapiens GN=AP2M1	0.146683	0.10657	0.344086	no hit	FALSE
WDR6	A0A087X295|E9PDU5|Q9NNW5	WD repeat-containing protein 6 OS=Homo sapiens GN=WDR6 PE=1 SV=1	0.146564	0.116006	0.3605	no hit	FALSE
LAS1L	Q9Y4W2|Q9Y4W2-2	Isoform 2 of Ribosomal biogenesis protein LAS1L OS=Homo sapiens GN=LAS1L|Ribosomal biogenesis protein LAS1L OS=Homo sapiens GN=LAS1L PE=1 SV=2	0.145993	0.154494	0.420353	no hit	FALSE
BUB3	O43684|O43684-2	Mitotic checkpoint protein BUB3 OS=Homo sapiens GN=BUB3 PE=1 SV=1|Isoform 2 of Mitotic checkpoint protein BUB3 OS=Homo sapiens GN=BUB3	0.14583	0.101947	0.335348	no hit	FALSE
COPG1	Q9Y678	Coatomer subunit gamma-1 OS=Homo sapiens GN=COPG1 PE=1 SV=1	0.1458	0.138283	0.39644	no hit	FALSE
UBE4A	Q14139|Q14139-2	Ubiquitin conjugation factor E4 A OS=Homo sapiens GN=UBE4A PE=1 SV=2|Isoform 2 of Ubiquitin conjugation factor E4 A OS=Homo sapiens GN=UBE4A	0.145738	0.183046	0.458286	no hit	FALSE
KIF11	P52732	Kinesin-like protein KIF11 OS=Homo sapiens GN=KIF11 PE=1 SV=2	0.145603	0.23761	0.522343	no hit	FALSE
CNTLN	Q9NXG0|Q9NXG0-2|Q9NXG0-3	Centlein OS=Homo sapiens GN=CNTLN PE=1 SV=5|Isoform 2 of Centlein OS=Homo sapiens GN=CNTLN|Isoform 3 of Centlein OS=Homo sapiens GN=CNTLN	0.145588	0.294517	0.581487	no hit	FALSE
BLM	H0YNU5|P54132	Bloom syndrome protein OS=Homo sapiens GN=BLM PE=1 SV=1	0.144671	0.201472	0.482307	no hit	FALSE
ABCB1	P08183|P08183-2	Isoform 2 of Multidrug resistance protein 1 OS=Homo sapiens GN=ABCB1|Multidrug resistance protein 1 OS=Homo sapiens GN=ABCB1 PE=1 SV=3	0.144601	0.149171	0.413386	no hit	FALSE
DHCR24|Nbla03646	Q15392|Q15392-2|Q3LIE7	Delta(24)-sterol reductase OS=Homo sapiens GN=DHCR24 PE=1 SV=2|Isoform 2 of Delta(24)-sterol reductase OS=Homo sapiens GN=DHCR24|Delta(24)-sterol reductase OS=Homo sapiens GN=Nbla03646 PE=1 SV=1	0.144556	0.167139	0.438097	no hit	FALSE
DDX20	Q9UHI6	Probable ATP-dependent RNA helicase DDX20 OS=Homo sapiens GN=DDX20 PE=1 SV=2	0.14434	0.162428	0.434251	no hit	FALSE
RPP30	P78346|P78346-2|Q5VU11	Isoform 2 of Ribonuclease P protein subunit p30 OS=Homo sapiens GN=RPP30|Ribonuclease P protein subunit p30 (Fragment) OS=Homo sapiens GN=RPP30 PE=1 SV=1|Ribonuclease P protein subunit p30 OS=Homo sapiens GN=RPP30 PE=1 SV=1	0.143838	0.240113	0.525568	no hit	FALSE
ILF2	B4DY09|Q12905	Interleukin enhancer-binding factor 2 OS=Homo sapiens GN=ILF2 PE=1 SV=1|Interleukin enhancer-binding factor 2 OS=Homo sapiens GN=ILF2 PE=1 SV=2	0.143562	0.225164	0.509603	enriched no hit	FALSE
SLC6A15	Q9H2J7	Sodium-dependent neutral amino acid transporter B(0)AT2 OS=Homo sapiens GN=SLC6A15 PE=1 SV=1	0.143557	0.400838	0.663427	no hit	FALSE
CAD	F8VPD4|P27708	CAD protein OS=Homo sapiens GN=CAD PE=1 SV=1|CAD protein OS=Homo sapiens GN=CAD PE=1 SV=3	0.143529	0.18209	0.456749	no hit	FALSE
BSG	P35613|P35613-2	Basigin OS=Homo sapiens GN=BSG PE=1 SV=2|Isoform 2 of Basigin OS=Homo sapiens GN=BSG	0.143484	0.291662	0.578181	no hit	FALSE
TRIM33	E7EN20|H0Y612|Q9UPN9|Q9UPN9-2	E3 ubiquitin-protein ligase TRIM33 (Fragment) OS=Homo sapiens GN=TRIM33 PE=1 SV=1|E3 ubiquitin-protein ligase TRIM33 OS=Homo sapiens GN=TRIM33 PE=1 SV=2|E3 ubiquitin-protein ligase TRIM33 OS=Homo sapiens GN=TRIM33 PE=1 SV=3|Isoform Beta of E3 ubiquitin-protein ligase TRIM33 OS=Homo sapiens GN=TRIM33	0.142885	0.247148	0.532526	no hit	FALSE
SLITRK5	O94991|O94991-2	Isoform 2 of SLIT and NTRK-like protein 5 OS=Homo sapiens GN=SLITRK5|SLIT and NTRK-like protein 5 OS=Homo sapiens GN=SLITRK5 PE=2 SV=2	0.141913	0.139596	0.398781	no hit	FALSE
GBF1	Q92538|Q92538-2|Q92538-3	Golgi-specific brefeldin A-resistance guanine nucleotide exchange factor 1 OS=Homo sapiens GN=GBF1 PE=1 SV=2|Isoform 2 of Golgi-specific brefeldin A-resistance guanine nucleotide exchange factor 1 OS=Homo sapiens GN=GBF1|Isoform 3 of Golgi-specific brefeldin A-resistance guanine nucleotide exchange factor 1 OS=Homo sapiens GN=GBF1	0.140865	0.185841	0.461957	no hit	FALSE
ZCCHC11	A0A0C4DFM7|Q5TAX3	Terminal uridylyltransferase 4 OS=Homo sapiens GN=ZCCHC11 PE=1 SV=1|Terminal uridylyltransferase 4 OS=Homo sapiens GN=ZCCHC11 PE=1 SV=3	0.140859	0.207626	0.489227	no hit	FALSE
ROCK1	A0A0U1RQV4|Q13464	Rho-associated protein kinase 1 OS=Homo sapiens GN=ROCK1 PE=1 SV=1|Rho-associated protein kinase 1 OS=Homo sapiens GN=ROCK1 PE=1 SV=1	0.140662	0.272632	0.560608	no hit	FALSE
CCNT1	O60563	Cyclin-T1 OS=Homo sapiens GN=CCNT1 PE=1 SV=1	0.140523	0.196333	0.473451	no hit	FALSE
MED17	Q9NVC6	Mediator of RNA polymerase II transcription subunit 17 OS=Homo sapiens GN=MED17 PE=1 SV=2	0.139761	0.314879	0.596223	no hit	FALSE
NCAPG	Q9BPX3	Condensin complex subunit 3 OS=Homo sapiens GN=NCAPG PE=1 SV=1	0.139469	0.228664	0.514168	no hit	FALSE
KDM3B	Q7LBC6	Lysine-specific demethylase 3B OS=Homo sapiens GN=KDM3B PE=1 SV=2	0.138534	0.454618	0.708111	no hit	FALSE
WHSC1L1	Q9BZ95|Q9BZ95-2|Q9BZ95-4|Q9BZ95-5	Histone-lysine N-methyltransferase NSD3 OS=Homo sapiens GN=WHSC1L1 PE=1 SV=1|Isoform 2 of Histone-lysine N-methyltransferase NSD3 OS=Homo sapiens GN=WHSC1L1|Isoform 4 of Histone-lysine N-methyltransferase NSD3 OS=Homo sapiens GN=WHSC1L1|Isoform 5 of Histone-lysine N-methyltransferase NSD3 OS=Homo sapiens GN=WHSC1L1	0.138171	0.202454	0.483059	no hit	FALSE
PSMD8	K7EJC1|K7EJR3|P48556|R4GMR5	26S proteasome non-ATPase regulatory subunit 8 (Fragment) OS=Homo sapiens GN=PSMD8 PE=1 SV=7|26S proteasome non-ATPase regulatory subunit 8 OS=Homo sapiens GN=PSMD8 PE=1 SV=1|26S proteasome non-ATPase regulatory subunit 8 OS=Homo sapiens GN=PSMD8 PE=1 SV=2	0.138071	0.326551	0.605682	no hit	FALSE
LDHB	P07195	L-lactate dehydrogenase B chain OS=Homo sapiens GN=LDHB PE=1 SV=2	0.137706	0.393221	0.659137	enriched no hit	FALSE
ZNF280C	Q8ND82	Zinc finger protein 280C OS=Homo sapiens GN=ZNF280C PE=1 SV=1	0.137669	0.36986	0.641498	no hit	FALSE
RPL18	F8VYV2|G3V203|H0YHA7|J3QQ67|Q07020|Q07020-2	60S ribosomal protein L18 (Fragment) OS=Homo sapiens GN=RPL18 PE=1 SV=1|60S ribosomal protein L18 OS=Homo sapiens GN=RPL18 PE=1 SV=1|60S ribosomal protein L18 OS=Homo sapiens GN=RPL18 PE=1 SV=2|Isoform 2 of 60S ribosomal protein L18 OS=Homo sapiens GN=RPL18	0.137586	0.38132	0.649213	no hit	FALSE
KTN1	Q86UP2	Kinectin OS=Homo sapiens GN=KTN1 PE=1 SV=1	0.137271	0.354296	0.632356	no hit	FALSE
TMEM214	Q6NUQ4|Q6NUQ4-2	Isoform 2 of Transmembrane protein 214 OS=Homo sapiens GN=TMEM214|Transmembrane protein 214 OS=Homo sapiens GN=TMEM214 PE=1 SV=2	0.136749	0.13038	0.383586	no hit	FALSE
SLC39A10	Q9ULF5	Zinc transporter ZIP10 OS=Homo sapiens GN=SLC39A10 PE=1 SV=2	0.136714	0.467551	0.71938	no hit	FALSE
RPL24	C9JNW5|C9JXB8|P83731	60S ribosomal protein L24 OS=Homo sapiens GN=RPL24 PE=1 SV=1	0.136225	0.158517	0.429813	no hit	FALSE
B3GALT6	Q96L58	Beta-1,3-galactosyltransferase 6 OS=Homo sapiens GN=B3GALT6 PE=1 SV=2	0.13608	0.34211	0.62037	no hit	FALSE
TLE3	A0A0D9SES8|F5H7D6|H0YKN8|H0YKT5|H0YL70|H0YNT2|Q04726|Q04726-2|Q04726-3|Q04726-4|Q04726-5|Q04726-6|Q04726-7	Isoform 2 of Transducin-like enhancer protein 3 OS=Homo sapiens GN=TLE3|Isoform 3 of Transducin-like enhancer protein 3 OS=Homo sapiens GN=TLE3|Isoform 4 of Transducin-like enhancer protein 3 OS=Homo sapiens GN=TLE3|Isoform 5 of Transducin-like enhancer protein 3 OS=Homo sapiens GN=TLE3|Isoform 6 of Transducin-like enhancer protein 3 OS=Homo sapiens GN=TLE3|Isoform 7 of Transducin-like enhancer p…	0.135964	0.32782	0.606397	no hit	FALSE
DNAJB1	M0R080|P25685|P25685-2	DnaJ homolog subfamily B member 1 (Fragment) OS=Homo sapiens GN=DNAJB1 PE=1 SV=1|DnaJ homolog subfamily B member 1 OS=Homo sapiens GN=DNAJB1 PE=1 SV=4|Isoform 2 of DnaJ homolog subfamily B member 1 OS=Homo sapiens GN=DNAJB1	0.135304	0.258848	0.543235	no hit	FALSE
TRIM27	P14373|P14373-2	Isoform Beta of Zinc finger protein RFP OS=Homo sapiens GN=TRIM27|Zinc finger protein RFP OS=Homo sapiens GN=TRIM27 PE=1 SV=1	0.135267	0.286258	0.570422	no hit	FALSE
EME1	H0Y9Z4|Q96AY2|Q96AY2-2	Crossover junction endonuclease EME1 (Fragment) OS=Homo sapiens GN=EME1 PE=1 SV=1|Crossover junction endonuclease EME1 OS=Homo sapiens GN=EME1 PE=1 SV=2|Isoform 2 of Crossover junction endonuclease EME1 OS=Homo sapiens GN=EME1	0.135263	0.317255	0.598036	no hit	FALSE
CANX	D6RD16|P27824|P27824-2	Calnexin OS=Homo sapiens GN=CANX PE=1 SV=1|Calnexin OS=Homo sapiens GN=CANX PE=1 SV=2|Isoform 2 of Calnexin OS=Homo sapiens GN=CANX	0.135175	0.310344	0.590815	no hit	FALSE
PBRM1	Q86U86|Q86U86-2|Q86U86-3|Q86U86-4|Q86U86-5|Q86U86-7|Q86U86-8|Q86U86-9	Isoform 2 of Protein polybromo-1 OS=Homo sapiens GN=PBRM1|Isoform 3 of Protein polybromo-1 OS=Homo sapiens GN=PBRM1|Isoform 4 of Protein polybromo-1 OS=Homo sapiens GN=PBRM1|Isoform 5 of Protein polybromo-1 OS=Homo sapiens GN=PBRM1|Isoform 7 of Protein polybromo-1 OS=Homo sapiens GN=PBRM1|Isoform 8 of Protein polybromo-1 OS=Homo sapiens GN=PBRM1|Isoform 9 of Protein polybromo-1 OS=Homo sapiens GN…	0.13505	0.12058	0.368172	no hit	FALSE
EXOC6	E7EW84|Q8TAG9|Q8TAG9-2	Exocyst complex component 6 OS=Homo sapiens GN=EXOC6 PE=1 SV=1|Exocyst complex component 6 OS=Homo sapiens GN=EXOC6 PE=1 SV=3|Isoform 2 of Exocyst complex component 6 OS=Homo sapiens GN=EXOC6	0.135049	0.320113	0.600946	no hit	FALSE
RPS15A	I3L3P7|P62244	40S ribosomal protein S15a OS=Homo sapiens GN=RPS15A PE=1 SV=1|40S ribosomal protein S15a OS=Homo sapiens GN=RPS15A PE=1 SV=2	0.134866	0.111613	0.352416	no hit	FALSE
FZR1	K7EQT1|Q9UM11|Q9UM11-2|Q9UM11-3	Fizzy-related protein homolog OS=Homo sapiens GN=FZR1 PE=1 SV=1|Fizzy-related protein homolog OS=Homo sapiens GN=FZR1 PE=1 SV=2|Isoform 2 of Fizzy-related protein homolog OS=Homo sapiens GN=FZR1|Isoform 3 of Fizzy-related protein homolog OS=Homo sapiens GN=FZR1	0.134715	0.269629	0.557496	no hit	FALSE
ATF6B	Q99941|Q99941-2	Cyclic AMP-dependent transcription factor ATF-6 beta OS=Homo sapiens GN=ATF6B PE=1 SV=2|Isoform 1 of Cyclic AMP-dependent transcription factor ATF-6 beta OS=Homo sapiens GN=ATF6B	0.134337	0.248072	0.532787	no hit	FALSE
POLR3B	Q9NW08|Q9NW08-2	DNA-directed RNA polymerase III subunit RPC2 OS=Homo sapiens GN=POLR3B PE=1 SV=2|Isoform 2 of DNA-directed RNA polymerase III subunit RPC2 OS=Homo sapiens GN=POLR3B	0.134141	0.194644	0.4717	no hit	FALSE
TRAPPC8	J3QQJ5|Q9Y2L5|Q9Y2L5-2	Isoform 2 of Trafficking protein particle complex subunit 8 OS=Homo sapiens GN=TRAPPC8|Trafficking protein particle complex subunit 8 OS=Homo sapiens GN=TRAPPC8 PE=1 SV=1|Trafficking protein particle complex subunit 8 OS=Homo sapiens GN=TRAPPC8 PE=1 SV=2	0.13405	0.151942	0.41774	no hit	FALSE
PLCD3	Q8N3E9	1-phosphatidylinositol 4,5-bisphosphate phosphodiesterase delta-3 OS=Homo sapiens GN=PLCD3 PE=1 SV=3	0.13377	0.253268	0.539071	no hit	FALSE
ZMYM2	Q9UBW7	Zinc finger MYM-type protein 2 OS=Homo sapiens GN=ZMYM2 PE=1 SV=1	0.133741	0.16866	0.44025	no hit	FALSE
PKN3	Q6P5Z2	Serine/threonine-protein kinase N3 OS=Homo sapiens GN=PKN3 PE=1 SV=1	0.133606	0.304875	0.588991	no hit	FALSE
ATG7	O95352|O95352-2|O95352-3	Isoform 2 of Ubiquitin-like modifier-activating enzyme ATG7 OS=Homo sapiens GN=ATG7|Isoform 3 of Ubiquitin-like modifier-activating enzyme ATG7 OS=Homo sapiens GN=ATG7|Ubiquitin-like modifier-activating enzyme ATG7 OS=Homo sapiens GN=ATG7 PE=1 SV=1	0.133347	0.321475	0.602383	no hit	FALSE
IFT172	Q9UG01	Intraflagellar transport protein 172 homolog OS=Homo sapiens GN=IFT172 PE=1 SV=2	0.132506	0.245132	0.530101	no hit	FALSE
PIK3C2A	O00443	Phosphatidylinositol 4-phosphate 3-kinase C2 domain-containing subunit alpha OS=Homo sapiens GN=PIK3C2A PE=1 SV=2	0.132413	0.2297	0.514816	no hit	FALSE
PPP4R3B	Q5MIZ7|Q5MIZ7-2|Q5MIZ7-3	Serine/threonine-protein phosphatase 4 regulatory subunit 3B OS=Homo sapiens GN=PPP4R3B PE=1 SV=2|Isoform 2 of Serine/threonine-protein phosphatase 4 regulatory subunit 3B OS=Homo sapiens GN=PPP4R3B|Isoform 3 of Serine/threonine-protein phosphatase 4 regulatory subunit 3B OS=Homo sapiens GN=PPP4R3B	0.132372	0.39782	0.662262	no hit	FALSE
PTPN13	Q12923|Q12923-2|Q12923-3|Q12923-4	Isoform 2 of Tyrosine-protein phosphatase non-receptor type 13 OS=Homo sapiens GN=PTPN13|Isoform 3 of Tyrosine-protein phosphatase non-receptor type 13 OS=Homo sapiens GN=PTPN13|Isoform 4 of Tyrosine-protein phosphatase non-receptor type 13 OS=Homo sapiens GN=PTPN13|Tyrosine-protein phosphatase non-receptor type 13 OS=Homo sapiens GN=PTPN13 PE=1 SV=2	0.132104	0.172536	0.443766	no hit	FALSE
DDX6	P26196	Probable ATP-dependent RNA helicase DDX6 OS=Homo sapiens GN=DDX6 PE=1 SV=2	0.131837	0.214417	0.498626	no hit	FALSE
TBC1D9B	Q66K14|Q66K14-2	TBC1 domain family member 9B OS=Homo sapiens GN=TBC1D9B PE=1 SV=3|Isoform 2 of TBC1 domain family member 9B OS=Homo sapiens GN=TBC1D9B	0.131418	0.253233	0.539071	no hit	FALSE
WDR61	H0YMF9|H0YN81|Q9GZS3	WD repeat-containing protein 61 OS=Homo sapiens GN=WDR61 PE=1 SV=1|WD repeat-containing protein 61 (Fragment) OS=Homo sapiens GN=WDR61 PE=1 SV=1|WD repeat-containing protein 61 OS=Homo sapiens GN=WDR61 PE=1 SV=1	0.131328	0.261759	0.546068	no hit	FALSE
HDAC2	Q92769|Q92769-3	Histone deacetylase 2 OS=Homo sapiens GN=HDAC2 PE=1 SV=2|Isoform 2 of Histone deacetylase 2 OS=Homo sapiens GN=HDAC2	0.131158	0.149674	0.414018	no hit	FALSE
FAM63B	J3KNL7|Q8NBR6|Q8NBR6-2	Family with sequence similarity 63, member B, isoform CRA_d OS=Homo sapiens GN=FAM63B PE=1 SV=1|Isoform 2 of Protein FAM63B OS=Homo sapiens GN=FAM63B|Protein FAM63B OS=Homo sapiens GN=FAM63B PE=1 SV=2	0.130976	0.56418	0.784568	no hit	FALSE
FASN	A0A0U1RQF0|P49327	Fatty acid synthase OS=Homo sapiens GN=FASN PE=1 SV=1|Fatty acid synthase OS=Homo sapiens GN=FASN PE=1 SV=3	0.130851	0.275382	0.563656	no hit	FALSE
ATP7B	A0A0U1RQY8|B7ZLR4|E7ET55|F5H562|F5H748|P35670|P35670-3|P35670-4	ATP7B protein OS=Homo sapiens GN=ATP7B PE=1 SV=1|Copper-transporting ATPase 2 OS=Homo sapiens GN=ATP7B PE=1 SV=1|Copper-transporting ATPase 2 OS=Homo sapiens GN=ATP7B PE=1 SV=2|Copper-transporting ATPase 2 OS=Homo sapiens GN=ATP7B PE=1 SV=4|Isoform 3 of Copper-transporting ATPase 2 OS=Homo sapiens GN=ATP7B|Isoform 4 of Copper-transporting ATPase 2 OS=Homo sapiens GN=ATP7B	0.130739	0.248284	0.532787	no hit	FALSE
RPS4X	P62701	40S ribosomal protein S4, X isoform OS=Homo sapiens GN=RPS4X PE=1 SV=2	0.130574	0.135724	0.394373	no hit	FALSE
RPL15	E7EQV9|P61313	60S ribosomal protein L15 OS=Homo sapiens GN=RPL15 PE=1 SV=2|Ribosomal protein L15 (Fragment) OS=Homo sapiens GN=RPL15 PE=1 SV=1	0.130382	0.316959	0.598036	no hit	FALSE
FANCL	B5MC31|Q9NW38|Q9NW38-2	E3 ubiquitin-protein ligase FANCL OS=Homo sapiens GN=FANCL PE=1 SV=1|E3 ubiquitin-protein ligase FANCL OS=Homo sapiens GN=FANCL PE=1 SV=2|Isoform 2 of E3 ubiquitin-protein ligase FANCL OS=Homo sapiens GN=FANCL	0.130327	0.672001	0.853007	no hit	FALSE
SEC22B	O75396	Vesicle-trafficking protein SEC22b OS=Homo sapiens GN=SEC22B PE=1 SV=4	0.130206	0.304346	0.588991	no hit	FALSE
SEC23IP	Q9Y6Y8	SEC23-interacting protein OS=Homo sapiens GN=SEC23IP PE=1 SV=1	0.130159	0.16435	0.436966	no hit	FALSE
DYNC1H1	Q14204	Cytoplasmic dynein 1 heavy chain 1 OS=Homo sapiens GN=DYNC1H1 PE=1 SV=5	0.130139	0.296288	0.582946	no hit	FALSE
DENND6A	Q8IWF6	Protein DENND6A OS=Homo sapiens GN=DENND6A PE=1 SV=1	0.130107	0.175911	0.44796	no hit	FALSE
MAD2L1	Q13257	Mitotic spindle assembly checkpoint protein MAD2A OS=Homo sapiens GN=MAD2L1 PE=1 SV=1	0.129865	0.217784	0.501158	no hit	FALSE
FBXO38	Q6PIJ6|Q6PIJ6-2|Q6PIJ6-3	F-box only protein 38 OS=Homo sapiens GN=FBXO38 PE=1 SV=3|Isoform 2 of F-box only protein 38 OS=Homo sapiens GN=FBXO38|Isoform 3 of F-box only protein 38 OS=Homo sapiens GN=FBXO38	0.129393	0.194979	0.47215	no hit	FALSE
CENPE	A0A087X0P0|Q02224|Q02224-2|Q02224-3	Centromere-associated protein E OS=Homo sapiens GN=CENPE PE=1 SV=1|Centromere-associated protein E OS=Homo sapiens GN=CENPE PE=1 SV=2|Isoform 2 of Centromere-associated protein E OS=Homo sapiens GN=CENPE|Isoform 3 of Centromere-associated protein E OS=Homo sapiens GN=CENPE	0.129236	0.191411	0.469284	no hit	FALSE
RPL11	P62913|P62913-2	60S ribosomal protein L11 OS=Homo sapiens GN=RPL11 PE=1 SV=2|Isoform 2 of 60S ribosomal protein L11 OS=Homo sapiens GN=RPL11	0.129226	0.307231	0.590453	no hit	FALSE
KRIT1	A0A0B4J2C7|O00522|O00522-2|O00522-3	Isoform 2 of Krev interaction trapped protein 1 OS=Homo sapiens GN=KRIT1|Isoform 3 of Krev interaction trapped protein 1 OS=Homo sapiens GN=KRIT1|Krev interaction trapped protein 1 OS=Homo sapiens GN=KRIT1 PE=1 SV=1|Krev interaction trapped protein 1 OS=Homo sapiens GN=KRIT1 PE=1 SV=2	0.129073	0.530646	0.761043	no hit	FALSE
HECTD3	Q5T447	E3 ubiquitin-protein ligase HECTD3 OS=Homo sapiens GN=HECTD3 PE=1 SV=1	0.128836	0.167729	0.438912	no hit	FALSE
EAPP	A0A087X060|G3V2W9|Q56P03	E2F-associated phosphoprotein OS=Homo sapiens GN=EAPP PE=1 SV=1|E2F-associated phosphoprotein (Fragment) OS=Homo sapiens GN=EAPP PE=1 SV=1|E2F-associated phosphoprotein OS=Homo sapiens GN=EAPP PE=1 SV=4	0.128658	0.296888	0.583668	no hit	FALSE
TRRAP	F2Z2U4|H0Y4W2|Q9Y4A5|Q9Y4A5-2	Isoform 2 of Transformation/transcription domain-associated protein OS=Homo sapiens GN=TRRAP|Transformation/transcription domain-associated protein (Fragment) OS=Homo sapiens GN=TRRAP PE=1 SV=1|Transformation/transcription domain-associated protein OS=Homo sapiens GN=TRRAP PE=1 SV=3	0.128444	0.36271	0.636461	no hit	FALSE
RPS10	P46783	40S ribosomal protein S10 OS=Homo sapiens GN=RPS10 PE=1 SV=1	0.1283	0.385042	0.653077	no hit	FALSE
GLT8D1	Q68CQ7	Glycosyltransferase 8 domain-containing protein 1 OS=Homo sapiens GN=GLT8D1 PE=1 SV=2	0.128198	0.218543	0.501439	no hit	FALSE
TTI1	O43156	TELO2-interacting protein 1 homolog OS=Homo sapiens GN=TTI1 PE=1 SV=3	0.127715	0.265641	0.551971	no hit	FALSE
USP7	Q93009	Ubiquitin carboxyl-terminal hydrolase 7 OS=Homo sapiens GN=USP7 PE=1 SV=2	0.127536	0.21623	0.500294	no hit	FALSE
TRIP4	Q15650	Activating signal cointegrator 1 OS=Homo sapiens GN=TRIP4 PE=1 SV=4	0.1275	0.164501	0.436966	no hit	FALSE
CCDC22	O60826	Coiled-coil domain-containing protein 22 OS=Homo sapiens GN=CCDC22 PE=1 SV=1	0.127077	0.3537	0.631923	no hit	FALSE
COG2	Q14746|Q14746-2	Conserved oligomeric Golgi complex subunit 2 OS=Homo sapiens GN=COG2 PE=1 SV=1|Isoform 2 of Conserved oligomeric Golgi complex subunit 2 OS=Homo sapiens GN=COG2	0.126374	0.333694	0.612641	enriched no hit	FALSE
THUMPD2	H7C5V1|Q9BTF0|Q9BTF0-2	Isoform 2 of THUMP domain-containing protein 2 OS=Homo sapiens GN=THUMPD2|THUMP domain-containing protein 2 (Fragment) OS=Homo sapiens GN=THUMPD2 PE=1 SV=1|THUMP domain-containing protein 2 OS=Homo sapiens GN=THUMPD2 PE=2 SV=2	0.126314	0.285313	0.570264	no hit	FALSE
PPM1G	O15355	Protein phosphatase 1G OS=Homo sapiens GN=PPM1G PE=1 SV=1	0.126232	0.367264	0.639868	no hit	FALSE
BAG3	O95817	BAG family molecular chaperone regulator 3 OS=Homo sapiens GN=BAG3 PE=1 SV=3	0.126079	0.395302	0.6597	no hit	FALSE
SEC24A	O95486	Protein transport protein Sec24A OS=Homo sapiens GN=SEC24A PE=1 SV=2	0.125965	0.310291	0.590815	no hit	FALSE
OSBPL3	Q9H4L5|Q9H4L5-2|Q9H4L5-3|Q9H4L5-4	Isoform 1b of Oxysterol-binding protein-related protein 3 OS=Homo sapiens GN=OSBPL3|Isoform 1c of Oxysterol-binding protein-related protein 3 OS=Homo sapiens GN=OSBPL3|Isoform 1d of Oxysterol-binding protein-related protein 3 OS=Homo sapiens GN=OSBPL3|Oxysterol-binding protein-related protein 3 OS=Homo sapiens GN=OSBPL3 PE=1 SV=1	0.125876	0.238584	0.523754	no hit	FALSE
ZMYM3	A6NHB5|A6NHN7|Q14202|Q14202-2	Isoform 2 of Zinc finger MYM-type protein 3 OS=Homo sapiens GN=ZMYM3|Zinc finger MYM-type protein 3 OS=Homo sapiens GN=ZMYM3 PE=1 SV=1|Zinc finger MYM-type protein 3 OS=Homo sapiens GN=ZMYM3 PE=1 SV=2	0.125796	0.204934	0.484799	no hit	FALSE
DICER1	Q9UPY3|Q9UPY3-2	Endoribonuclease Dicer OS=Homo sapiens GN=DICER1 PE=1 SV=3|Isoform 2 of Endoribonuclease Dicer OS=Homo sapiens GN=DICER1	0.125694	0.193908	0.471248	no hit	FALSE
ATIC	P31939	Bifunctional purine biosynthesis protein PURH OS=Homo sapiens GN=ATIC PE=1 SV=3	0.125373	0.281822	0.568339	no hit	FALSE
PTPRU	Q92729|Q92729-2|Q92729-3	Receptor-type tyrosine-protein phosphatase U OS=Homo sapiens GN=PTPRU PE=1 SV=2|Isoform 2 of Receptor-type tyrosine-protein phosphatase U OS=Homo sapiens GN=PTPRU|Isoform 3 of Receptor-type tyrosine-protein phosphatase U OS=Homo sapiens GN=PTPRU	0.125025	0.198148	0.475796	no hit	FALSE
YEATS2	Q9ULM3	YEATS domain-containing protein 2 OS=Homo sapiens GN=YEATS2 PE=1 SV=2	0.124852	0.545884	0.770748	no hit	FALSE
CCAR2	Q8N163|Q8N163-2	Cell cycle and apoptosis regulator protein 2 OS=Homo sapiens GN=CCAR2 PE=1 SV=2|Isoform 2 of Cell cycle and apoptosis regulator protein 2 OS=Homo sapiens GN=CCAR2	0.124417	0.225177	0.509603	no hit	FALSE
NVL	O15381	Nuclear valosin-containing protein-like OS=Homo sapiens GN=NVL PE=1 SV=1	0.124341	0.254302	0.539813	no hit	FALSE
VRK2	Q86Y07|Q86Y07-2|Q86Y07-3|Q86Y07-5	Isoform 2 of Serine/threonine-protein kinase VRK2 OS=Homo sapiens GN=VRK2|Isoform 3 of Serine/threonine-protein kinase VRK2 OS=Homo sapiens GN=VRK2|Isoform 5 of Serine/threonine-protein kinase VRK2 OS=Homo sapiens GN=VRK2|Serine/threonine-protein kinase VRK2 OS=Homo sapiens GN=VRK2 PE=1 SV=3	0.124327	0.234562	0.519269	no hit	FALSE
RSBN1L	A0A087X239|Q6PCB5	Round spermatid basic protein 1-like protein OS=Homo sapiens GN=RSBN1L PE=1 SV=1|Round spermatid basic protein 1-like protein OS=Homo sapiens GN=RSBN1L PE=1 SV=2	0.124147	0.440257	0.697498	no hit	FALSE
RPL6	Q02878	60S ribosomal protein L6 OS=Homo sapiens GN=RPL6 PE=1 SV=3	0.124074	0.355188	0.632785	no hit	FALSE
POMT1	Q5JT02|Q9Y6A1|Q9Y6A1-2|Q9Y6A1-3|Q9Y6A1-4	Isoform 2 of Protein O-mannosyl-transferase 1 OS=Homo sapiens GN=POMT1|Isoform 3 of Protein O-mannosyl-transferase 1 OS=Homo sapiens GN=POMT1|Isoform 4 of Protein O-mannosyl-transferase 1 OS=Homo sapiens GN=POMT1|Protein O-mannosyl-transferase 1 (Fragment) OS=Homo sapiens GN=POMT1 PE=1 SV=1|Protein O-mannosyl-transferase 1 OS=Homo sapiens GN=POMT1 PE=1 SV=3	0.124056	0.1968	0.473953	no hit	FALSE
DHX40	Q8IX18|Q8IX18-3	Probable ATP-dependent RNA helicase DHX40 OS=Homo sapiens GN=DHX40 PE=1 SV=2|Isoform 3 of Probable ATP-dependent RNA helicase DHX40 OS=Homo sapiens GN=DHX40	0.123898	0.19285	0.470955	no hit	FALSE
TRIM13	O60858|O60858-3|X6R9U5	E3 ubiquitin-protein ligase TRIM13 (Fragment) OS=Homo sapiens GN=TRIM13 PE=1 SV=1|E3 ubiquitin-protein ligase TRIM13 OS=Homo sapiens GN=TRIM13 PE=1 SV=2|Isoform 3 of E3 ubiquitin-protein ligase TRIM13 OS=Homo sapiens GN=TRIM13	0.123813	0.210022	0.492135	no hit	FALSE
WDR13	Q9H1Z4|Q9H1Z4-2	Isoform 2 of WD repeat-containing protein 13 OS=Homo sapiens GN=WDR13|WD repeat-containing protein 13 OS=Homo sapiens GN=WDR13 PE=1 SV=2	0.12359	0.399911	0.663427	no hit	FALSE
WDR19	Q8NEZ3	WD repeat-containing protein 19 OS=Homo sapiens GN=WDR19 PE=1 SV=2	0.123538	0.281317	0.567937	enriched no hit	FALSE
WBP11	Q9Y2W2	WW domain-binding protein 11 OS=Homo sapiens GN=WBP11 PE=1 SV=1	0.123507	0.380791	0.648663	no hit	FALSE
CWF19L1	Q69YN2|Q69YN2-3|X6R7M0	CWF19-like protein 1 OS=Homo sapiens GN=CWF19L1 PE=1 SV=1|CWF19-like protein 1 OS=Homo sapiens GN=CWF19L1 PE=1 SV=2|Isoform 3 of CWF19-like protein 1 OS=Homo sapiens GN=CWF19L1	0.123491	0.227197	0.511965	no hit	FALSE
SUPT5H	O00267|O00267-2	Transcription elongation factor SPT5 OS=Homo sapiens GN=SUPT5H PE=1 SV=1|Isoform 2 of Transcription elongation factor SPT5 OS=Homo sapiens GN=SUPT5H	0.123343	0.37796	0.645336	no hit	FALSE
ERBB2	B4DTR1|J3QLU9|P04626|P04626-2|P04626-3|P04626-4|P04626-5	Isoform 2 of Receptor tyrosine-protein kinase erbB-2 OS=Homo sapiens GN=ERBB2|Isoform 3 of Receptor tyrosine-protein kinase erbB-2 OS=Homo sapiens GN=ERBB2|Isoform 4 of Receptor tyrosine-protein kinase erbB-2 OS=Homo sapiens GN=ERBB2|Isoform 5 of Receptor tyrosine-protein kinase erbB-2 OS=Homo sapiens GN=ERBB2|Receptor protein-tyrosine kinase OS=Homo sapiens GN=ERBB2 PE=1 SV=1|Receptor tyrosine-p…	0.123097	0.304714	0.588991	no hit	FALSE
SLC1A5	M0QXM4|Q15758	Neutral amino acid transporter B(0) OS=Homo sapiens GN=SLC1A5 PE=1 SV=1|Neutral amino acid transporter B(0) OS=Homo sapiens GN=SLC1A5 PE=1 SV=2	0.123023	0.341903	0.620351	no hit	FALSE
SBNO1	A3KN83|A3KN83-2|A3KN83-3|A3KN83-4	Isoform 2 of Protein strawberry notch homolog 1 OS=Homo sapiens GN=SBNO1|Isoform 3 of Protein strawberry notch homolog 1 OS=Homo sapiens GN=SBNO1|Isoform 4 of Protein strawberry notch homolog 1 OS=Homo sapiens GN=SBNO1|Protein strawberry notch homolog 1 OS=Homo sapiens GN=SBNO1 PE=1 SV=1	0.123009	0.343872	0.622586	no hit	FALSE
FAM120B	A0A0D9SEJ5|F5GY05|Q96EK7|Q96EK7-2	Constitutive coactivator of peroxisome proliferator-activated receptor gamma OS=Homo sapiens GN=FAM120B PE=1 SV=1|Isoform 2 of Constitutive coactivator of peroxisome proliferator-activated receptor gamma OS=Homo sapiens GN=FAM120B	0.122978	0.28031	0.567859	no hit	FALSE
CCNB2V|CCNB2	H1UBN3|O95067	Cyclin B2 OS=Homo sapiens GN=CCNB2V PE=1 SV=1|G2/mitotic-specific cyclin-B2 OS=Homo sapiens GN=CCNB2 PE=1 SV=1	0.122774	0.370281	0.641874	no hit	FALSE
RNMT	O43148|O43148-2	mRNA cap guanine-N7 methyltransferase OS=Homo sapiens GN=RNMT PE=1 SV=1|Isoform 2 of mRNA cap guanine-N7 methyltransferase OS=Homo sapiens GN=RNMT	0.122763	0.313851	0.595183	no hit	FALSE
RUVBL2	Q9Y230	RuvB-like 2 OS=Homo sapiens GN=RUVBL2 PE=1 SV=3	0.122607	0.16406	0.436966	no hit	FALSE
HTT	P42858	Huntingtin OS=Homo sapiens GN=HTT PE=1 SV=2	0.122542	0.375179	0.643012	no hit	FALSE
KNTC1	P50748	Kinetochore-associated protein 1 OS=Homo sapiens GN=KNTC1 PE=1 SV=1	0.122457	0.240246	0.525568	no hit	FALSE
LAMB2	P55268	Laminin subunit beta-2 OS=Homo sapiens GN=LAMB2 PE=1 SV=2	0.122347	0.483578	0.729772	enriched no hit	FALSE
IMPACT	Q9P2X3|Q9P2X3-2	Protein IMPACT OS=Homo sapiens GN=IMPACT PE=1 SV=2|Isoform 2 of Protein IMPACT OS=Homo sapiens GN=IMPACT	0.122063	0.272462	0.560608	no hit	FALSE
DNA2	P51530|P51530-4	DNA replication ATP-dependent helicase/nuclease DNA2 OS=Homo sapiens GN=DNA2 PE=1 SV=3|Isoform 4 of DNA replication ATP-dependent helicase/nuclease DNA2 OS=Homo sapiens GN=DNA2	0.121598	0.310422	0.590815	no hit	FALSE
KIAA2013	Q8IYS2|Q8IYS2-2	Uncharacterized protein KIAA2013 OS=Homo sapiens GN=KIAA2013 PE=1 SV=1|Isoform 2 of Uncharacterized protein KIAA2013 OS=Homo sapiens GN=KIAA2013	0.121452	0.261151	0.546068	no hit	FALSE
ATAD5	A0A075B754|Q96QE3|Q96QE3-2	ATPase family AAA domain-containing protein 5 OS=Homo sapiens GN=ATAD5 PE=1 SV=1|ATPase family AAA domain-containing protein 5 OS=Homo sapiens GN=ATAD5 PE=1 SV=4|Isoform 2 of ATPase family AAA domain-containing protein 5 OS=Homo sapiens GN=ATAD5	0.121371	0.310159	0.590815	no hit	FALSE
PPP1R10	Q96QC0	Serine/threonine-protein phosphatase 1 regulatory subunit 10 OS=Homo sapiens GN=PPP1R10 PE=1 SV=1	0.120935	0.663454	0.848247	no hit	FALSE
CPSF1	Q10570	Cleavage and polyadenylation specificity factor subunit 1 OS=Homo sapiens GN=CPSF1 PE=1 SV=2	0.120934	0.161113	0.432758	no hit	FALSE
CCAR1	Q8IX12|Q8IX12-2	Cell division cycle and apoptosis regulator protein 1 OS=Homo sapiens GN=CCAR1 PE=1 SV=2|Isoform 2 of Cell division cycle and apoptosis regulator protein 1 OS=Homo sapiens GN=CCAR1	0.120478	0.214141	0.498626	no hit	FALSE
SMCR8	Q8TEV9|Q8TEV9-2	Isoform 2 of Smith-Magenis syndrome chromosomal region candidate gene 8 protein OS=Homo sapiens GN=SMCR8|Smith-Magenis syndrome chromosomal region candidate gene 8 protein OS=Homo sapiens GN=SMCR8 PE=1 SV=2	0.120316	0.272073	0.560608	no hit	FALSE
LCOR	Q96JN0|Q96JN0-2	Ligand-dependent corepressor OS=Homo sapiens GN=LCOR PE=1 SV=2|Isoform 2 of Ligand-dependent corepressor OS=Homo sapiens GN=LCOR	0.120282	0.472103	0.722007	no hit	FALSE
NEDD1	Q8NHV4|Q8NHV4-2|Q8NHV4-3	Isoform 2 of Protein NEDD1 OS=Homo sapiens GN=NEDD1|Isoform 3 of Protein NEDD1 OS=Homo sapiens GN=NEDD1|Protein NEDD1 OS=Homo sapiens GN=NEDD1 PE=1 SV=1	0.120028	0.187591	0.46353	no hit	FALSE
EYA3	B1APR7|Q99504|Q99504-2|Q99504-3|Q99504-4|Q99504-5	Eyes absent homolog 3 OS=Homo sapiens GN=EYA3 PE=1 SV=3|Eyes absent homolog OS=Homo sapiens GN=EYA3 PE=1 SV=1|Isoform 2 of Eyes absent homolog 3 OS=Homo sapiens GN=EYA3|Isoform 3 of Eyes absent homolog 3 OS=Homo sapiens GN=EYA3|Isoform 4 of Eyes absent homolog 3 OS=Homo sapiens GN=EYA3|Isoform 5 of Eyes absent homolog 3 OS=Homo sapiens GN=EYA3	0.120006	0.225546	0.510072	no hit	FALSE
NRBF2	A0A087WUL7|Q96F24|Q96F24-2|Q96F24-3	Isoform 2 of Nuclear receptor-binding factor 2 OS=Homo sapiens GN=NRBF2|Isoform 3 of Nuclear receptor-binding factor 2 OS=Homo sapiens GN=NRBF2|Nuclear receptor-binding factor 2 OS=Homo sapiens GN=NRBF2 PE=1 SV=1	0.119775	0.668627	0.851472	no hit	FALSE
DVL2	I3L2N2|O14641	Segment polarity protein dishevelled homolog DVL-2 OS=Homo sapiens GN=DVL2 PE=1 SV=1|Segment polarity protein dishevelled homolog DVL-2 OS=Homo sapiens GN=DVL2 PE=1 SV=1	0.119572	0.293063	0.579863	no hit	FALSE
PKN1	Q16512|Q16512-2	Serine/threonine-protein kinase N1 OS=Homo sapiens GN=PKN1 PE=1 SV=2|Isoform 2 of Serine/threonine-protein kinase N1 OS=Homo sapiens GN=PKN1	0.119272	0.280577	0.567937	no hit	FALSE
ATG2B	Q96BY7	Autophagy-related protein 2 homolog B OS=Homo sapiens GN=ATG2B PE=1 SV=5	0.119213	0.372997	0.642856	no hit	FALSE
GNL3L	Q9NVN8	Guanine nucleotide-binding protein-like 3-like protein OS=Homo sapiens GN=GNL3L PE=1 SV=1	0.118789	0.272646	0.560608	no hit	FALSE
HERC2	O95714	E3 ubiquitin-protein ligase HERC2 OS=Homo sapiens GN=HERC2 PE=1 SV=2	0.118499	0.316975	0.598036	no hit	FALSE
GLYR1	K7EMM8|Q49A26|Q49A26-2|Q49A26-3|Q49A26-4	Isoform 2 of Putative oxidoreductase GLYR1 OS=Homo sapiens GN=GLYR1|Isoform 3 of Putative oxidoreductase GLYR1 OS=Homo sapiens GN=GLYR1|Isoform 4 of Putative oxidoreductase GLYR1 OS=Homo sapiens GN=GLYR1|Putative oxidoreductase GLYR1 (Fragment) OS=Homo sapiens GN=GLYR1 PE=1 SV=2|Putative oxidoreductase GLYR1 OS=Homo sapiens GN=GLYR1 PE=1 SV=3	0.11849	0.256914	0.541752	no hit	FALSE
SRGAP2	A0A075B7B5|A2RUF3|B7ZM87|O75044	SLIT-ROBO Rho GTPase-activating protein 2 OS=Homo sapiens GN=SRGAP2 PE=1 SV=1|SLIT-ROBO Rho GTPase activating protein 2 OS=Homo sapiens GN=SRGAP2 PE=1 SV=1|SLIT-ROBO Rho GTPase-activating protein 2 OS=Homo sapiens GN=SRGAP2 PE=1 SV=1|SLIT-ROBO Rho GTPase-activating protein 2 OS=Homo sapiens GN=SRGAP2 PE=1 SV=2	0.118162	0.405422	0.668204	no hit	FALSE
VTI1B	Q9UEU0	Vesicle transport through interaction with t-SNAREs homolog 1B OS=Homo sapiens GN=VTI1B PE=1 SV=3	0.118101	0.394883	0.6597	no hit	FALSE
VPRBP	Q9Y4B6|Q9Y4B6-2|Q9Y4B6-3	Isoform 2 of Protein VPRBP OS=Homo sapiens GN=VPRBP|Isoform 3 of Protein VPRBP OS=Homo sapiens GN=VPRBP|Protein VPRBP OS=Homo sapiens GN=VPRBP PE=1 SV=3	0.117688	0.286298	0.570422	no hit	FALSE
ANAPC1	Q9H1A4	Anaphase-promoting complex subunit 1 OS=Homo sapiens GN=ANAPC1 PE=1 SV=1	0.117571	0.229186	0.514606	no hit	FALSE
SUN2	Q9UH99|Q9UH99-2|Q9UH99-3	SUN domain-containing protein 2 OS=Homo sapiens GN=SUN2 PE=1 SV=3|Isoform 2 of SUN domain-containing protein 2 OS=Homo sapiens GN=SUN2|Isoform 3 of SUN domain-containing protein 2 OS=Homo sapiens GN=SUN2	0.117483	0.449532	0.703941	no hit	FALSE
TSTD2	Q5T7W7	Thiosulfate sulfurtransferase/rhodanese-like domain-containing protein 2 OS=Homo sapiens GN=TSTD2 PE=1 SV=1	0.117421	0.546232	0.770748	enriched no hit	FALSE
STRN3	Q13033|Q13033-2	Striatin-3 OS=Homo sapiens GN=STRN3 PE=1 SV=3|Isoform Alpha of Striatin-3 OS=Homo sapiens GN=STRN3	0.117222	0.510862	0.747649	no hit	FALSE
P3H3	Q8IVL6|Q8IVL6-2	Prolyl 3-hydroxylase 3 OS=Homo sapiens GN=P3H3 PE=1 SV=1|Isoform 2 of Prolyl 3-hydroxylase 3 OS=Homo sapiens GN=P3H3	0.117202	0.327788	0.606397	no hit	FALSE
PFN1	P07737	Profilin-1 OS=Homo sapiens GN=PFN1 PE=1 SV=2	0.116656	0.35958	0.634862	no hit	FALSE
MSH3	P20585	DNA mismatch repair protein Msh3 OS=Homo sapiens GN=MSH3 PE=1 SV=4	0.116481	0.185916	0.461957	no hit	FALSE
TXLNA	P40222	Alpha-taxilin OS=Homo sapiens GN=TXLNA PE=1 SV=3	0.116296	0.469513	0.719721	no hit	FALSE
KIF22	H3BRB3|Q14807|Q14807-2	Isoform 2 of Kinesin-like protein KIF22 OS=Homo sapiens GN=KIF22|Kinesin-like protein KIF22 OS=Homo sapiens GN=KIF22 PE=1 SV=5|Kinesin-like protein OS=Homo sapiens GN=KIF22 PE=1 SV=1	0.116033	0.361243	0.63637	no hit	FALSE
EIF2S1	P05198	Eukaryotic translation initiation factor 2 subunit 1 OS=Homo sapiens GN=EIF2S1 PE=1 SV=3	0.115916	0.207884	0.489467	no hit	FALSE
POLR2A	A0A087WWE2|A0A0C4DGZ0|P24928	DNA-directed RNA polymerase II subunit RPB1 OS=Homo sapiens GN=POLR2A PE=1 SV=2|DNA-directed RNA polymerase subunit OS=Homo sapiens GN=POLR2A PE=1 SV=1	0.115906	0.196167	0.473451	no hit	FALSE
TMEM201	H0Y4R5|Q5SNT2	Transmembrane protein 201 (Fragment) OS=Homo sapiens GN=TMEM201 PE=1 SV=1|Transmembrane protein 201 OS=Homo sapiens GN=TMEM201 PE=1 SV=1	0.11581	0.284325	0.569373	no hit	FALSE
PLAA	Q9Y263	Phospholipase A-2-activating protein OS=Homo sapiens GN=PLAA PE=1 SV=2	0.11578	0.250654	0.535681	no hit	FALSE
INPPL1	A0A0A0MTP6|O15357|O15357-2	Isoform 2 of Phosphatidylinositol 3,4,5-trisphosphate 5-phosphatase 2 OS=Homo sapiens GN=INPPL1|Phosphatidylinositol 3,4,5-trisphosphate 5-phosphatase 2 OS=Homo sapiens GN=INPPL1 PE=1 SV=1|Phosphatidylinositol 3,4,5-trisphosphate 5-phosphatase 2 OS=Homo sapiens GN=INPPL1 PE=1 SV=2	0.11578	0.39509	0.6597	no hit	FALSE
GPS1	C9JFE4|Q13098|Q13098-5|Q13098-7	COP9 signalosome complex subunit 1 OS=Homo sapiens GN=GPS1 PE=1 SV=2|COP9 signalosome complex subunit 1 OS=Homo sapiens GN=GPS1 PE=1 SV=4|Isoform 4 of COP9 signalosome complex subunit 1 OS=Homo sapiens GN=GPS1|Isoform 2 of COP9 signalosome complex subunit 1 OS=Homo sapiens GN=GPS1	0.115553	0.217156	0.501158	no hit	FALSE
LRWD1	Q9UFC0	Leucine-rich repeat and WD repeat-containing protein 1 OS=Homo sapiens GN=LRWD1 PE=1 SV=2	0.115486	0.210048	0.492135	no hit	FALSE
RHOBTB3	O94955	Rho-related BTB domain-containing protein 3 OS=Homo sapiens GN=RHOBTB3 PE=1 SV=2	0.115383	0.308383	0.590815	no hit	FALSE
FLNB	O75369|O75369-2|O75369-3|O75369-6|O75369-8|O75369-9	Filamin-B OS=Homo sapiens GN=FLNB PE=1 SV=2|Isoform 2 of Filamin-B OS=Homo sapiens GN=FLNB|Isoform 3 of Filamin-B OS=Homo sapiens GN=FLNB|Isoform 6 of Filamin-B OS=Homo sapiens GN=FLNB|Isoform 8 of Filamin-B OS=Homo sapiens GN=FLNB|Isoform 9 of Filamin-B OS=Homo sapiens GN=FLNB	0.115258	0.368434	0.640502	no hit	FALSE
PUM1	E9PR38|H0YEH2|Q14671|Q14671-2|Q14671-3|Q14671-4|Q5T1Z4|Q5T1Z8	Isoform 2 of Pumilio homolog 1 OS=Homo sapiens GN=PUM1|Isoform 3 of Pumilio homolog 1 OS=Homo sapiens GN=PUM1|Isoform 4 of Pumilio homolog 1 OS=Homo sapiens GN=PUM1|Pumilio homolog 1 (Fragment) OS=Homo sapiens GN=PUM1 PE=1 SV=1|Pumilio homolog 1 OS=Homo sapiens GN=PUM1 PE=1 SV=1|Pumilio homolog 1 OS=Homo sapiens GN=PUM1 PE=1 SV=3	0.115236	0.373093	0.642856	no hit	FALSE
SRP68	Q9UHB9	Signal recognition particle subunit SRP68 OS=Homo sapiens GN=SRP68 PE=1 SV=2	0.115129	0.21966	0.502541	no hit	FALSE
LEMD2	H7C2Z0|Q8NC56	LEM domain-containing protein 2 (Fragment) OS=Homo sapiens GN=LEMD2 PE=1 SV=1|LEM domain-containing protein 2 OS=Homo sapiens GN=LEMD2 PE=1 SV=1	0.114937	0.410204	0.671852	no hit	FALSE
ARHGEF12	E9PMR6|Q9NZN5|Q9NZN5-2	Rho guanine nucleotide exchange factor 12 OS=Homo sapiens GN=ARHGEF12 PE=1 SV=1|Rho guanine nucleotide exchange factor 12 OS=Homo sapiens GN=ARHGEF12 PE=1 SV=1|Isoform 2 of Rho guanine nucleotide exchange factor 12 OS=Homo sapiens GN=ARHGEF12	0.114603	0.30199	0.58769	no hit	FALSE
H7BZW1|C21orf59	H7BZW1|H7C2R6|P57076	Uncharacterized protein (Fragment) OS=Homo sapiens PE=4 SV=1|UPF0769 protein C21orf59 (Fragment) OS=Homo sapiens GN=C21orf59 PE=4 SV=1|UPF0769 protein C21orf59 OS=Homo sapiens GN=C21orf59 PE=1 SV=1	0.114561	0.308628	0.590815	no hit	FALSE
DOCK7	H0Y7L2|Q96N67|Q96N67-2|Q96N67-3|Q96N67-4|Q96N67-5|Q96N67-6	Dedicator of cytokinesis protein 7 OS=Homo sapiens GN=DOCK7 PE=1 SV=2|Dedicator of cytokinesis protein 7 OS=Homo sapiens GN=DOCK7 PE=1 SV=4|Isoform 2 of Dedicator of cytokinesis protein 7 OS=Homo sapiens GN=DOCK7|Isoform 3 of Dedicator of cytokinesis protein 7 OS=Homo sapiens GN=DOCK7|Isoform 4 of Dedicator of cytokinesis protein 7 OS=Homo sapiens GN=DOCK7|Isoform 5 of Dedicator of cytokinesis pr…	0.114469	0.177931	0.450989	no hit	FALSE
SPAG9	A0A087X2D8|O60271|O60271-2|O60271-4|O60271-9	C-Jun-amino-terminal kinase-interacting protein 4 OS=Homo sapiens GN=SPAG9 PE=1 SV=1|C-Jun-amino-terminal kinase-interacting protein 4 OS=Homo sapiens GN=SPAG9 PE=1 SV=4|Isoform 2 of C-Jun-amino-terminal kinase-interacting protein 4 OS=Homo sapiens GN=SPAG9|Isoform 4 of C-Jun-amino-terminal kinase-interacting protein 4 OS=Homo sapiens GN=SPAG9|Isoform 6 of C-Jun-amino-terminal kinase-interacting …	0.114204	0.365261	0.638551	no hit	FALSE
KPNA1	P52294	Importin subunit alpha-5 OS=Homo sapiens GN=KPNA1 PE=1 SV=3	0.113795	0.463409	0.715108	no hit	FALSE
C12orf4	Q9NQ89	Protein C12orf4 OS=Homo sapiens GN=C12orf4 PE=2 SV=1	0.113655	0.475235	0.725451	enriched no hit	FALSE
PARD3	F5GZI3|Q5VWU8|Q5VWV2|Q8TEW0|Q8TEW0-10|Q8TEW0-11|Q8TEW0-2|Q8TEW0-3|Q8TEW0-4|Q8TEW0-5|Q8TEW0-6|Q8TEW0-7|Q8TEW0-8|Q8TEW0-9	Isoform 10 of Partitioning defective 3 homolog OS=Homo sapiens GN=PARD3|Isoform 11 of Partitioning defective 3 homolog OS=Homo sapiens GN=PARD3|Isoform 2 of Partitioning defective 3 homolog OS=Homo sapiens GN=PARD3|Isoform 3 of Partitioning defective 3 homolog OS=Homo sapiens GN=PARD3|Isoform 4 of Partitioning defective 3 homolog OS=Homo sapiens GN=PARD3|Isoform 5 of Partitioning defective 3 homo…	0.113606	0.371945	0.642856	no hit	FALSE
XIAP	P98170	E3 ubiquitin-protein ligase XIAP OS=Homo sapiens GN=XIAP PE=1 SV=2	0.113594	0.421736	0.683989	no hit	FALSE
BRCA1	P38398|P38398-4|P38398-7|P38398-8	Breast cancer type 1 susceptibility protein OS=Homo sapiens GN=BRCA1 PE=1 SV=2|Isoform 4 of Breast cancer type 1 susceptibility protein OS=Homo sapiens GN=BRCA1|Isoform 7 of Breast cancer type 1 susceptibility protein OS=Homo sapiens GN=BRCA1|Isoform 8 of Breast cancer type 1 susceptibility protein OS=Homo sapiens GN=BRCA1	0.113551	0.249166	0.533682	no hit	FALSE
LLGL1	A0A087WW77|Q15334	Lethal(2) giant larvae protein homolog 1 OS=Homo sapiens GN=LLGL1 PE=1 SV=1|Lethal(2) giant larvae protein homolog 1 OS=Homo sapiens GN=LLGL1 PE=1 SV=3	0.113447	0.229604	0.514816	no hit	FALSE
ARHGEF1	M0QZR4|Q92888|Q92888-2|Q92888-3	Rho guanine nucleotide exchange factor 1 OS=Homo sapiens GN=ARHGEF1 PE=1 SV=1|Rho guanine nucleotide exchange factor 1 OS=Homo sapiens GN=ARHGEF1 PE=1 SV=2|Isoform 2 of Rho guanine nucleotide exchange factor 1 OS=Homo sapiens GN=ARHGEF1|Isoform 3 of Rho guanine nucleotide exchange factor 1 OS=Homo sapiens GN=ARHGEF1	0.113219	0.320135	0.600946	no hit	FALSE
NUP107	P57740	Nuclear pore complex protein Nup107 OS=Homo sapiens GN=NUP107 PE=1 SV=1	0.113059	0.23171	0.515493	no hit	FALSE
TFIP11	Q9UBB9	Tuftelin-interacting protein 11 OS=Homo sapiens GN=TFIP11 PE=1 SV=1	0.112997	0.228965	0.514478	no hit	FALSE
NUP188	Q5SRE5	Nucleoporin NUP188 homolog OS=Homo sapiens GN=NUP188 PE=1 SV=1	0.112433	0.301881	0.58769	no hit	FALSE
UFD1L	Q92890|Q92890-1|Q92890-3	Isoform 3 of Ubiquitin fusion degradation protein 1 homolog OS=Homo sapiens GN=UFD1L|Isoform Long of Ubiquitin fusion degradation protein 1 homolog OS=Homo sapiens GN=UFD1L|Ubiquitin fusion degradation protein 1 homolog OS=Homo sapiens GN=UFD1L PE=1 SV=3	0.112273	0.205836	0.486464	no hit	FALSE
MLF1	P58340|P58340-2|P58340-3|P58340-4|P58340-5	Isoform 2 of Myeloid leukemia factor 1 OS=Homo sapiens GN=MLF1|Isoform 3 of Myeloid leukemia factor 1 OS=Homo sapiens GN=MLF1|Isoform 4 of Myeloid leukemia factor 1 OS=Homo sapiens GN=MLF1|Isoform 5 of Myeloid leukemia factor 1 OS=Homo sapiens GN=MLF1|Myeloid leukemia factor 1 OS=Homo sapiens GN=MLF1 PE=1 SV=1	0.112131	0.443589	0.700743	no hit	FALSE
OTUD5	Q96G74|Q96G74-3|Q96G74-5	OTU domain-containing protein 5 OS=Homo sapiens GN=OTUD5 PE=1 SV=1|Isoform 3 of OTU domain-containing protein 5 OS=Homo sapiens GN=OTUD5|Isoform 5 of OTU domain-containing protein 5 OS=Homo sapiens GN=OTUD5	0.11195	0.478673	0.726354	no hit	FALSE
ZNF318	Q5VUA4	Zinc finger protein 318 OS=Homo sapiens GN=ZNF318 PE=1 SV=2	0.111865	0.387825	0.655326	no hit	FALSE
ZZEF1	O43149|O43149-3	Isoform 3 of Zinc finger ZZ-type and EF-hand domain-containing protein 1 OS=Homo sapiens GN=ZZEF1|Zinc finger ZZ-type and EF-hand domain-containing protein 1 OS=Homo sapiens GN=ZZEF1 PE=1 SV=6	0.111568	0.476447	0.72562	no hit	FALSE
ODR4	Q5SWX8|Q5SWX8-2|Q5SWX8-4	Isoform 2 of Protein odr-4 homolog OS=Homo sapiens GN=ODR4|Isoform 4 of Protein odr-4 homolog OS=Homo sapiens GN=ODR4|Protein odr-4 homolog OS=Homo sapiens GN=ODR4 PE=1 SV=1	0.111469	0.251478	0.536351	no hit	FALSE
TBC1D10A	B5MD46|Q9BXI6|Q9BXI6-2	Isoform 2 of TBC1 domain family member 10A OS=Homo sapiens GN=TBC1D10A|TBC1 domain family member 10A OS=Homo sapiens GN=TBC1D10A PE=1 SV=1	0.110656	0.34791	0.62584	no hit	FALSE
GBE1	E9PGM4|Q04446	1,4-alpha-glucan-branching enzyme OS=Homo sapiens GN=GBE1 PE=1 SV=1|1,4-alpha-glucan-branching enzyme OS=Homo sapiens GN=GBE1 PE=1 SV=3	0.110439	0.448794	0.703941	no hit	FALSE
KDM3A	F5H070|Q9Y4C1	Lysine-specific demethylase 3A OS=Homo sapiens GN=KDM3A PE=1 SV=2|Lysine-specific demethylase 3A OS=Homo sapiens GN=KDM3A PE=1 SV=4	0.110356	0.24518	0.530101	no hit	FALSE
PTPN9	A0A0A0MR09|P43378	Tyrosine-protein phosphatase non-receptor type 9 OS=Homo sapiens GN=PTPN9 PE=1 SV=1|Tyrosine-protein phosphatase non-receptor type 9 OS=Homo sapiens GN=PTPN9 PE=1 SV=1	0.11022	0.293013	0.579863	no hit	FALSE
SLC38A1	F8VX04|Q9H2H9	Sodium-coupled neutral amino acid transporter 1 OS=Homo sapiens GN=SLC38A1 PE=1 SV=1|Sodium-coupled neutral amino acid transporter 1 OS=Homo sapiens GN=SLC38A1 PE=1 SV=1	0.110178	0.349566	0.626688	no hit	FALSE
DIABLO	A0A024RBT2|F5GXT8|F5H796|Q9NR28|Q9NR28-2|Q9NR28-3	Diablo homolog, mitochondrial (Fragment) OS=Homo sapiens GN=DIABLO PE=1 SV=1|Diablo homolog, mitochondrial (Fragment) OS=Homo sapiens GN=DIABLO PE=1 SV=7|Diablo homolog, mitochondrial OS=Homo sapiens GN=DIABLO PE=1 SV=1|Isoform 2 of Diablo homolog, mitochondrial OS=Homo sapiens GN=DIABLO|Isoform 3 of Diablo homolog, mitochondrial OS=Homo sapiens GN=DIABLO	0.110153	0.53082	0.761043	no hit	FALSE
DIAPH3	Q9NSV4|Q9NSV4-4|Q9NSV4-5|Q9NSV4-6	Protein diaphanous homolog 3 OS=Homo sapiens GN=DIAPH3 PE=1 SV=4|Isoform 4 of Protein diaphanous homolog 3 OS=Homo sapiens GN=DIAPH3|Isoform 5 of Protein diaphanous homolog 3 OS=Homo sapiens GN=DIAPH3|Isoform 6 of Protein diaphanous homolog 3 OS=Homo sapiens GN=DIAPH3	0.110052	0.278059	0.56663	no hit	FALSE
RINT1	Q6NUQ1	RAD50-interacting protein 1 OS=Homo sapiens GN=RINT1 PE=1 SV=1	0.109957	0.336279	0.614149	no hit	FALSE
DNAJC7	Q99615	DnaJ homolog subfamily C member 7 OS=Homo sapiens GN=DNAJC7 PE=1 SV=2	0.10983	0.368857	0.640502	no hit	FALSE
GPCPD1	H0Y565|Q9NPB8	Glycerophosphocholine phosphodiesterase GPCPD1 (Fragment) OS=Homo sapiens GN=GPCPD1 PE=1 SV=1|Glycerophosphocholine phosphodiesterase GPCPD1 OS=Homo sapiens GN=GPCPD1 PE=1 SV=2	0.109631	0.317499	0.598136	no hit	FALSE
NEMF	G3V5V3|O60524|O60524-3|O60524-4|O60524-5	Isoform 3 of Nuclear export mediator factor NEMF OS=Homo sapiens GN=NEMF|Isoform 4 of Nuclear export mediator factor NEMF OS=Homo sapiens GN=NEMF|Isoform 5 of Nuclear export mediator factor NEMF OS=Homo sapiens GN=NEMF|Nuclear export mediator factor NEMF (Fragment) OS=Homo sapiens GN=NEMF PE=1 SV=7|Nuclear export mediator factor NEMF OS=Homo sapiens GN=NEMF PE=1 SV=4	0.109612	0.189406	0.467282	no hit	FALSE
TMED9	Q9BVK6	Transmembrane emp24 domain-containing protein 9 OS=Homo sapiens GN=TMED9 PE=1 SV=2	0.109589	0.477647	0.726354	no hit	FALSE
TMEM11	P17152	Transmembrane protein 11, mitochondrial OS=Homo sapiens GN=TMEM11 PE=1 SV=1	0.10924	0.408595	0.67098	no hit	FALSE
UBE4B	O95155|O95155-2|O95155-4	Ubiquitin conjugation factor E4 B OS=Homo sapiens GN=UBE4B PE=1 SV=1|Isoform 2 of Ubiquitin conjugation factor E4 B OS=Homo sapiens GN=UBE4B|Isoform 4 of Ubiquitin conjugation factor E4 B OS=Homo sapiens GN=UBE4B	0.109181	0.359493	0.634862	no hit	FALSE
GNE	Q9Y223|Q9Y223-2|Q9Y223-3|Q9Y223-4|Q9Y223-5	Bifunctional UDP-N-acetylglucosamine 2-epimerase/N-acetylmannosamine kinase OS=Homo sapiens GN=GNE PE=1 SV=1|Isoform 2 of Bifunctional UDP-N-acetylglucosamine 2-epimerase/N-acetylmannosamine kinase OS=Homo sapiens GN=GNE|Isoform 3 of Bifunctional UDP-N-acetylglucosamine 2-epimerase/N-acetylmannosamine kinase OS=Homo sapiens GN=GNE|Isoform 4 of Bifunctional UDP-N-acetylglucosamine 2-epimerase/N-ac…	0.10914	0.422037	0.684126	no hit	FALSE
EEF2	P13639	Elongation factor 2 OS=Homo sapiens GN=EEF2 PE=1 SV=4	0.109069	0.428454	0.687445	no hit	FALSE
CLP1	E9PL17|Q92989|Q92989-2	Isoform 2 of Polyribonucleotide 5'-hydroxyl-kinase Clp1 OS=Homo sapiens GN=CLP1|Polyribonucleotide 5'-hydroxyl-kinase Clp1 OS=Homo sapiens GN=CLP1 PE=1 SV=1	0.108913	0.365901	0.638856	enriched no hit	FALSE
SMS	P52788|P52788-2	Isoform 2 of Spermine synthase OS=Homo sapiens GN=SMS|Spermine synthase OS=Homo sapiens GN=SMS PE=1 SV=2	0.108613	0.359118	0.63486	no hit	FALSE
PSMC5	P62195	26S protease regulatory subunit 8 OS=Homo sapiens GN=PSMC5 PE=1 SV=1	0.108532	0.517973	0.75282	no hit	FALSE
TIMELESS	Q9UNS1|Q9UNS1-2	Protein timeless homolog OS=Homo sapiens GN=TIMELESS PE=1 SV=2|Isoform 2 of Protein timeless homolog OS=Homo sapiens GN=TIMELESS	0.108146	0.358899	0.63486	no hit	FALSE
NAA25	Q14CX7|Q14CX7-2	Isoform 2 of N-alpha-acetyltransferase 25, NatB auxiliary subunit OS=Homo sapiens GN=NAA25|N-alpha-acetyltransferase 25, NatB auxiliary subunit OS=Homo sapiens GN=NAA25 PE=1 SV=1	0.107922	0.415048	0.677229	enriched no hit	FALSE
NCKAP1	Q9Y2A7|Q9Y2A7-2	Nck-associated protein 1 OS=Homo sapiens GN=NCKAP1 PE=1 SV=1|Isoform 2 of Nck-associated protein 1 OS=Homo sapiens GN=NCKAP1	0.107758	0.226095	0.510579	no hit	FALSE
ETNK1	H0YH69|Q9HBU6	Ethanolamine kinase 1 (Fragment) OS=Homo sapiens GN=ETNK1 PE=1 SV=1|Ethanolamine kinase 1 OS=Homo sapiens GN=ETNK1 PE=1 SV=1	0.107521	0.283138	0.568427	no hit	FALSE
ATRN	O75882|O75882-2|O75882-3	Attractin OS=Homo sapiens GN=ATRN PE=1 SV=2|Isoform 2 of Attractin OS=Homo sapiens GN=ATRN|Isoform 3 of Attractin OS=Homo sapiens GN=ATRN	0.107452	0.518093	0.75282	no hit	FALSE
CEP55	Q53EZ4	Centrosomal protein of 55 kDa OS=Homo sapiens GN=CEP55 PE=1 SV=3	0.10742	0.310141	0.590815	no hit	FALSE
SEPTIN7	E7EPK1|E7ES33|G3V1Q4|Q16181|Q16181-2	Isoform 2 of Septin-7 OS=Homo sapiens GN=SEPT7|Septin-7 OS=Homo sapiens GN=SEPT7 PE=1 SV=2|Septin-7 OS=Homo sapiens GN=SEPT7 PE=1 SV=3	0.107127	0.323281	0.602538	no hit	FALSE
RIOK1	Q9BRS2	Serine/threonine-protein kinase RIO1 OS=Homo sapiens GN=RIOK1 PE=1 SV=2	0.107125	0.403137	0.665786	no hit	FALSE
RB1	P06400	Retinoblastoma-associated protein OS=Homo sapiens GN=RB1 PE=1 SV=2	0.107111	0.359019	0.63486	no hit	FALSE
PSMD2	Q13200	26S proteasome non-ATPase regulatory subunit 2 OS=Homo sapiens GN=PSMD2 PE=1 SV=3	0.107105	0.346794	0.624904	no hit	FALSE
KIF1B	O60333-2|O60333-3	Isoform 2 of Kinesin-like protein KIF1B OS=Homo sapiens GN=KIF1B|Isoform 3 of Kinesin-like protein KIF1B OS=Homo sapiens GN=KIF1B	0.106748	0.300688	0.587685	no hit	FALSE
HPS3	G5E9V4|H7C5G2|Q969F9|Q969F9-2	Hermansky-Pudlak syndrome 3 protein (Fragment) OS=Homo sapiens GN=HPS3 PE=1 SV=1|Hermansky-Pudlak syndrome 3 protein OS=Homo sapiens GN=HPS3 PE=1 SV=1|Isoform 2 of Hermansky-Pudlak syndrome 3 protein OS=Homo sapiens GN=HPS3	0.106741	0.549777	0.772634	enriched no hit	FALSE
DHX34	Q14147	Probable ATP-dependent RNA helicase DHX34 OS=Homo sapiens GN=DHX34 PE=1 SV=2	0.106698	0.581291	0.797028	no hit	FALSE
AAR2	A2A2Q9|Q9Y312	Protein AAR2 homolog OS=Homo sapiens GN=AAR2 PE=1 SV=1|Protein AAR2 homolog OS=Homo sapiens GN=AAR2 PE=1 SV=2	0.106605	0.25463	0.540144	no hit	FALSE
SEPTIN9	Q9UHD8|Q9UHD8-2|Q9UHD8-5|Q9UHD8-7	Septin-9 OS=Homo sapiens GN=SEPT9 PE=1 SV=2|Isoform 2 of Septin-9 OS=Homo sapiens GN=SEPT9|Isoform 5 of Septin-9 OS=Homo sapiens GN=SEPT9|Isoform 7 of Septin-9 OS=Homo sapiens GN=SEPT9	0.106445	0.393118	0.659137	no hit	FALSE
SIRT1	B0QZ35|E9PC49|Q96EB6	NAD-dependent protein deacetylase sirtuin-1 OS=Homo sapiens GN=SIRT1 PE=1 SV=1|NAD-dependent protein deacetylase sirtuin-1 OS=Homo sapiens GN=SIRT1 PE=1 SV=2	0.106234	0.428432	0.687445	no hit	FALSE
GRAMD1A	M0QZ12|Q96CP6|Q96CP6-2|Q96CP6-3	GRAM domain-containing protein 1A OS=Homo sapiens GN=GRAMD1A PE=1 SV=1|GRAM domain-containing protein 1A OS=Homo sapiens GN=GRAMD1A PE=1 SV=2|Isoform 2 of GRAM domain-containing protein 1A OS=Homo sapiens GN=GRAMD1A|Isoform 3 of GRAM domain-containing protein 1A OS=Homo sapiens GN=GRAMD1A	0.105924	0.242531	0.526665	no hit	FALSE
DNAJB14	Q8TBM8	DnaJ homolog subfamily B member 14 OS=Homo sapiens GN=DNAJB14 PE=1 SV=1	0.105908	0.381838	0.649743	no hit	FALSE
EIF2A	F8WAE5|Q9BY44|Q9BY44-3|Q9BY44-4	Eukaryotic translation initiation factor 2A OS=Homo sapiens GN=EIF2A PE=1 SV=1|Eukaryotic translation initiation factor 2A OS=Homo sapiens GN=EIF2A PE=1 SV=3|Isoform 3 of Eukaryotic translation initiation factor 2A OS=Homo sapiens GN=EIF2A|Isoform 4 of Eukaryotic translation initiation factor 2A OS=Homo sapiens GN=EIF2A	0.105672	0.284116	0.569334	no hit	FALSE
SMC6	Q96SB8|Q96SB8-2	Structural maintenance of chromosomes protein 6 OS=Homo sapiens GN=SMC6 PE=1 SV=2|Isoform 2 of Structural maintenance of chromosomes protein 6 OS=Homo sapiens GN=SMC6	0.105654	0.22646	0.51067	no hit	FALSE
TBL1XR1	A0A0D9SF63|Q9BZK7	F-box-like/WD repeat-containing protein TBL1XR1 OS=Homo sapiens GN=TBL1XR1 PE=1 SV=1|F-box-like/WD repeat-containing protein TBL1XR1 OS=Homo sapiens GN=TBL1XR1 PE=1 SV=1	0.105653	0.285303	0.570264	no hit	FALSE
TTK	P33981|P33981-2	Dual specificity protein kinase TTK OS=Homo sapiens GN=TTK PE=1 SV=2|Isoform 2 of Dual specificity protein kinase TTK OS=Homo sapiens GN=TTK	0.105312	0.336534	0.614149	no hit	FALSE
DYNC1I2	E7EQL5|Q13409|Q13409-2|Q13409-3|Q13409-5|Q13409-6|Q13409-7	Cytoplasmic dynein 1 intermediate chain 2 (Fragment) OS=Homo sapiens GN=DYNC1I2 PE=1 SV=1|Cytoplasmic dynein 1 intermediate chain 2 OS=Homo sapiens GN=DYNC1I2 PE=1 SV=3|Isoform 2B of Cytoplasmic dynein 1 intermediate chain 2 OS=Homo sapiens GN=DYNC1I2|Isoform 2C of Cytoplasmic dynein 1 intermediate chain 2 OS=Homo sapiens GN=DYNC1I2|Isoform 2E of Cytoplasmic dynein 1 intermediate chain 2 OS=Homo …	0.104773	0.389703	0.655992	no hit	FALSE
GNAI2	P04899|P04899-2|P04899-3|P04899-4|P04899-5|P04899-6	Guanine nucleotide-binding protein G(i) subunit alpha-2 OS=Homo sapiens GN=GNAI2 PE=1 SV=3|Isoform 2 of Guanine nucleotide-binding protein G(i) subunit alpha-2 OS=Homo sapiens GN=GNAI2|Isoform 3 of Guanine nucleotide-binding protein G(i) subunit alpha-2 OS=Homo sapiens GN=GNAI2|Isoform sGi2 of Guanine nucleotide-binding protein G(i) subunit alpha-2 OS=Homo sapiens GN=GNAI2|Isoform 5 of Guanine nu…	0.104426	0.368879	0.640502	no hit	FALSE
MIS18BP1	Q6P0N0	Mis18-binding protein 1 OS=Homo sapiens GN=MIS18BP1 PE=1 SV=1	0.104282	0.398904	0.662692	no hit	FALSE
MAEA	D6RDW4|D6REW7|D6RIB6|E7ESC7|Q7L5Y9|Q7L5Y9-2|Q7L5Y9-3|Q7L5Y9-4|Q7L5Y9-5	Isoform 2 of Macrophage erythroblast attacher OS=Homo sapiens GN=MAEA|Isoform 3 of Macrophage erythroblast attacher OS=Homo sapiens GN=MAEA|Isoform 4 of Macrophage erythroblast attacher OS=Homo sapiens GN=MAEA|Isoform 5 of Macrophage erythroblast attacher OS=Homo sapiens GN=MAEA|Macrophage erythroblast attacher (Fragment) OS=Homo sapiens GN=MAEA PE=1 SV=1|Macrophage erythroblast attacher OS=Homo …	0.104173	0.443762	0.700743	no hit	FALSE
PITPNB	A0A0A0MSW4|P48739|P48739-2|P48739-3	Phosphatidylinositol transfer protein beta isoform OS=Homo sapiens GN=PITPNB PE=1 SV=1|Phosphatidylinositol transfer protein beta isoform OS=Homo sapiens GN=PITPNB PE=1 SV=2|Isoform 2 of Phosphatidylinositol transfer protein beta isoform OS=Homo sapiens GN=PITPNB|Isoform 3 of Phosphatidylinositol transfer protein beta isoform OS=Homo sapiens GN=PITPNB	0.103973	0.406681	0.669712	no hit	FALSE
PIGK	Q92643	GPI-anchor transamidase OS=Homo sapiens GN=PIGK PE=1 SV=2	0.103949	0.278095	0.56663	no hit	FALSE
POLR3C	E9PHH9|Q9BUI4	DNA-directed RNA polymerase III subunit RPC3 OS=Homo sapiens GN=POLR3C PE=1 SV=1	0.103946	0.37426	0.643012	no hit	FALSE
BTBD3	Q9Y2F9|Q9Y2F9-2	BTB/POZ domain-containing protein 3 OS=Homo sapiens GN=BTBD3 PE=2 SV=1|Isoform 2 of BTB/POZ domain-containing protein 3 OS=Homo sapiens GN=BTBD3	0.103635	0.501119	0.742693	no hit	FALSE
SLC39A6	K7EQ91|Q13433|Q13433-2	Isoform 2 of Zinc transporter ZIP6 OS=Homo sapiens GN=SLC39A6|Zinc transporter ZIP6 (Fragment) OS=Homo sapiens GN=SLC39A6 PE=1 SV=1|Zinc transporter ZIP6 OS=Homo sapiens GN=SLC39A6 PE=1 SV=3	0.103505	0.363909	0.637145	no hit	FALSE
VPS16	Q9H269|Q9H269-2	Isoform 2 of Vacuolar protein sorting-associated protein 16 homolog OS=Homo sapiens GN=VPS16|Vacuolar protein sorting-associated protein 16 homolog OS=Homo sapiens GN=VPS16 PE=1 SV=2	0.103397	0.29446	0.581487	no hit	FALSE
LPCAT1	Q8NF37	Lysophosphatidylcholine acyltransferase 1 OS=Homo sapiens GN=LPCAT1 PE=1 SV=2	0.103346	0.269716	0.557496	no hit	FALSE
GEMIN5	Q8TEQ6	Gem-associated protein 5 OS=Homo sapiens GN=GEMIN5 PE=1 SV=3	0.103161	0.326369	0.605682	no hit	FALSE
ASCC3	Q8N3C0	Activating signal cointegrator 1 complex subunit 3 OS=Homo sapiens GN=ASCC3 PE=1 SV=3	0.103065	0.230906	0.515206	no hit	FALSE
CAPN7	Q9Y6W3	Calpain-7 OS=Homo sapiens GN=CAPN7 PE=1 SV=1	0.102817	0.409476	0.67172	no hit	FALSE
YWHAG	P61981	14-3-3 protein gamma OS=Homo sapiens GN=YWHAG PE=1 SV=2	0.102801	0.439544	0.696796	no hit	FALSE
CMAS	Q8NFW8	N-acylneuraminate cytidylyltransferase OS=Homo sapiens GN=CMAS PE=1 SV=2	0.102471	0.362276	0.63641	no hit	FALSE
DNAJC16	Q5TDG9|Q5TDH4|Q9Y2G8	DnaJ (Hsp40) homolog, subfamily C, member 16, isoform CRA_a OS=Homo sapiens GN=DNAJC16 PE=1 SV=1|DnaJ homolog subfamily C member 16 OS=Homo sapiens GN=DNAJC16 PE=1 SV=1|DnaJ homolog subfamily C member 16 OS=Homo sapiens GN=DNAJC16 PE=2 SV=3	0.102113	0.394252	0.6597	no hit	FALSE
NME7	B4DXC8|E9PNU1|Q9Y5B8|Q9Y5B8-2	Isoform 2 of Nucleoside diphosphate kinase 7 OS=Homo sapiens GN=NME7|Nucleoside diphosphate kinase 7 OS=Homo sapiens GN=NME7 PE=1 SV=1	0.10199	0.419987	0.682703	no hit	FALSE
SQLE	E7EVQ6|Q14534	Squalene monooxygenase OS=Homo sapiens GN=SQLE PE=1 SV=1|Squalene monooxygenase OS=Homo sapiens GN=SQLE PE=1 SV=3	0.101922	0.399553	0.663393	no hit	FALSE
NOL9	Q5SY16	Polynucleotide 5'-hydroxyl-kinase NOL9 OS=Homo sapiens GN=NOL9 PE=1 SV=1	0.101785	0.280907	0.567937	no hit	FALSE
DIS3	Q9Y2L1	Exosome complex exonuclease RRP44 OS=Homo sapiens GN=DIS3 PE=1 SV=2	0.101493	0.246247	0.531678	no hit	FALSE
CLINT1	Q14677|Q14677-3	Clathrin interactor 1 OS=Homo sapiens GN=CLINT1 PE=1 SV=1|Isoform 3 of Clathrin interactor 1 OS=Homo sapiens GN=CLINT1	0.101413	0.327997	0.606397	no hit	FALSE
ANLN	Q9NQW6|Q9NQW6-2	Actin-binding protein anillin OS=Homo sapiens GN=ANLN PE=1 SV=2|Isoform 2 of Actin-binding protein anillin OS=Homo sapiens GN=ANLN	0.10137	0.489213	0.733372	no hit	FALSE
CC2D1A	Q6P1N0|Q6P1N0-2	Coiled-coil and C2 domain-containing protein 1A OS=Homo sapiens GN=CC2D1A PE=1 SV=1|Isoform 2 of Coiled-coil and C2 domain-containing protein 1A OS=Homo sapiens GN=CC2D1A	0.101324	0.345441	0.623895	no hit	FALSE
FAM208A	Q9UK61|Q9UK61-3	Protein TASOR OS=Homo sapiens GN=FAM208A PE=1 SV=3|Isoform 3 of Protein TASOR OS=Homo sapiens GN=FAM208A	0.101314	0.340464	0.619527	no hit	FALSE
SMARCD2	B9EGA3|J3KMX2|Q92925|Q92925-2|Q92925-3	Isoform 2 of SWI/SNF-related matrix-associated actin-dependent regulator of chromatin subfamily D member 2 OS=Homo sapiens GN=SMARCD2|Isoform 3 of SWI/SNF-related matrix-associated actin-dependent regulator of chromatin subfamily D member 2 OS=Homo sapiens GN=SMARCD2|SMARCD2 protein OS=Homo sapiens GN=SMARCD2 PE=1 SV=1|SWI/SNF-related matrix-associated actin-dependent regulator of chromatin subfa…	0.101041	0.349943	0.626989	no hit	FALSE
ARL1	B4DZG7|F8VYN9|P40616|P40616-2	ADP-ribosylation factor-like protein 1 OS=Homo sapiens GN=ARL1 PE=1 SV=1|Isoform 2 of ADP-ribosylation factor-like protein 1 OS=Homo sapiens GN=ARL1	0.101032	0.401577	0.6643	no hit	FALSE
C16orf62	C9J7I2|E7EWW0|F5H7K1|H3BV68|Q7Z3J2|Q7Z3J2-2	Esophageal cancer associated protein, isoform CRA_a OS=Homo sapiens GN=C16orf62 PE=1 SV=1|Isoform 2 of UPF0505 protein C16orf62 OS=Homo sapiens GN=C16orf62|UPF0505 protein C16orf62 OS=Homo sapiens GN=C16orf62 PE=1 SV=1|UPF0505 protein C16orf62 OS=Homo sapiens GN=C16orf62 PE=1 SV=2	0.100937	0.449842	0.703941	no hit	FALSE
EXOSC9	D6RIY6|Q06265|Q06265-2|Q06265-3|Q06265-4	Exosome complex component RRP45 OS=Homo sapiens GN=EXOSC9 PE=1 SV=1|Exosome complex component RRP45 OS=Homo sapiens GN=EXOSC9 PE=1 SV=3|Isoform 2 of Exosome complex component RRP45 OS=Homo sapiens GN=EXOSC9|Isoform 3 of Exosome complex component RRP45 OS=Homo sapiens GN=EXOSC9|Isoform 4 of Exosome complex component RRP45 OS=Homo sapiens GN=EXOSC9	0.1007	0.322656	0.602538	no hit	FALSE
ABHD6	A0A087X2C5|C9JNE7|Q9BV23	Monoacylglycerol lipase ABHD6 (Fragment) OS=Homo sapiens GN=ABHD6 PE=1 SV=1|Monoacylglycerol lipase ABHD6 OS=Homo sapiens GN=ABHD6 PE=1 SV=1	0.100659	0.321379	0.602383	no hit	FALSE
NEU1	E9PIF4|Q99519	Sialidase-1 OS=Homo sapiens GN=NEU1 PE=1 SV=1|Sialidase-1 OS=Homo sapiens GN=NEU1 PE=1 SV=1	0.100643	0.420649	0.68293	no hit	FALSE
ATP6V0D1	F5GYQ1|P61421|R4GN72	V-type proton ATPase subunit d 1 OS=Homo sapiens GN=ATP6V0D1 PE=1 SV=1|V-type proton ATPase subunit d 1 OS=Homo sapiens GN=ATP6V0D1 PE=1 SV=1|V-type proton ATPase subunit d 1 OS=Homo sapiens GN=ATP6V0D1 PE=1 SV=1	0.100396	0.427805	0.687383	no hit	FALSE
NCAPH2	A0A0A6YYG7|Q6IBW4|Q6IBW4-2|Q6IBW4-4	Condensin-2 complex subunit H2 OS=Homo sapiens GN=NCAPH2 PE=1 SV=1|Condensin-2 complex subunit H2 OS=Homo sapiens GN=NCAPH2 PE=1 SV=1|Isoform 2 of Condensin-2 complex subunit H2 OS=Homo sapiens GN=NCAPH2|Isoform 4 of Condensin-2 complex subunit H2 OS=Homo sapiens GN=NCAPH2	0.100359	0.484454	0.730743	no hit	FALSE
PKP4	A0A0D9SF60|Q99569|Q99569-2	Isoform 2 of Plakophilin-4 OS=Homo sapiens GN=PKP4|Plakophilin-4 OS=Homo sapiens GN=PKP4 PE=1 SV=1|Plakophilin-4 OS=Homo sapiens GN=PKP4 PE=1 SV=2	0.100356	0.319098	0.600072	no hit	FALSE
SEC11C	B4DI03|K7EJQ7|Q9BY50	Signal peptidase complex catalytic subunit SEC11 OS=Homo sapiens GN=SEC11C PE=1 SV=1|Signal peptidase complex catalytic subunit SEC11 OS=Homo sapiens GN=SEC11C PE=1 SV=1|Signal peptidase complex catalytic subunit SEC11C OS=Homo sapiens GN=SEC11C PE=1 SV=3	0.100308	0.483092	0.729485	no hit	FALSE
ADGRA3	Q8IWK6|Q8IWK6-2|Q8IWK6-3|Q8IWK6-4	Adhesion G protein-coupled receptor A3 OS=Homo sapiens GN=ADGRA3 PE=1 SV=2|Isoform 2 of Adhesion G protein-coupled receptor A3 OS=Homo sapiens GN=ADGRA3|Isoform 3 of Adhesion G protein-coupled receptor A3 OS=Homo sapiens GN=ADGRA3|Isoform 4 of Adhesion G protein-coupled receptor A3 OS=Homo sapiens GN=ADGRA3	0.100114	0.310613	0.590821	no hit	FALSE
USP4	Q13107|Q13107-2	Ubiquitin carboxyl-terminal hydrolase 4 OS=Homo sapiens GN=USP4 PE=1 SV=3|Isoform 2 of Ubiquitin carboxyl-terminal hydrolase 4 OS=Homo sapiens GN=USP4	0.100051	0.338058	0.61586	no hit	FALSE
ADAM10	O14672	Disintegrin and metalloproteinase domain-containing protein 10 OS=Homo sapiens GN=ADAM10 PE=1 SV=1	0.0998546	0.507527	0.746395	no hit	FALSE
TRIM32	Q13049	E3 ubiquitin-protein ligase TRIM32 OS=Homo sapiens GN=TRIM32 PE=1 SV=2	0.099541	0.510191	0.747448	no hit	FALSE
SEC14L1	K7EJ08|K7EPE4|Q92503|Q92503-2|Q92503-3	Isoform 2 of SEC14-like protein 1 OS=Homo sapiens GN=SEC14L1|Isoform 3 of SEC14-like protein 1 OS=Homo sapiens GN=SEC14L1|SEC14-like protein 1 (Fragment) OS=Homo sapiens GN=SEC14L1 PE=1 SV=1|SEC14-like protein 1 OS=Homo sapiens GN=SEC14L1 PE=1 SV=2	0.0994428	0.390022	0.655992	no hit	FALSE
LTN1	O94822|O94822-3	E3 ubiquitin-protein ligase listerin OS=Homo sapiens GN=LTN1 PE=1 SV=6|Isoform 3 of E3 ubiquitin-protein ligase listerin OS=Homo sapiens GN=LTN1	0.0990814	0.373706	0.642856	no hit	FALSE
PSMD9	F5GX23|F5H169|F5H5V4|J3KN29|O00233|O00233-2	26S proteasome non-ATPase regulatory subunit 9 OS=Homo sapiens GN=PSMD9 PE=1 SV=1|26S proteasome non-ATPase regulatory subunit 9 OS=Homo sapiens GN=PSMD9 PE=1 SV=1|26S proteasome non-ATPase regulatory subunit 9 (Fragment) OS=Homo sapiens GN=PSMD9 PE=1 SV=1|26S proteasome non-ATPase regulatory subunit 9 OS=Homo sapiens GN=PSMD9 PE=1 SV=1|26S proteasome non-ATPase regulatory subunit 9 OS=Homo sapie…	0.0986351	0.626237	0.825332	no hit	FALSE
EXOSC10	Q01780	Exosome component 10 OS=Homo sapiens GN=EXOSC10 PE=1 SV=2	0.0985497	0.303187	0.588991	no hit	FALSE
MSH6	P52701	DNA mismatch repair protein Msh6 OS=Homo sapiens GN=MSH6 PE=1 SV=2	0.0984341	0.233905	0.51825	no hit	FALSE
CUL5	Q93034	Cullin-5 OS=Homo sapiens GN=CUL5 PE=1 SV=4	0.0984168	0.281112	0.567937	no hit	FALSE
HSD17B7	P56937|P56937-2|P56937-3	3-keto-steroid reductase OS=Homo sapiens GN=HSD17B7 PE=1 SV=1|Isoform 2 of 3-keto-steroid reductase OS=Homo sapiens GN=HSD17B7|Isoform 3 of 3-keto-steroid reductase OS=Homo sapiens GN=HSD17B7	0.0981617	0.395088	0.6597	no hit	FALSE
PPP4C	P60510	Serine/threonine-protein phosphatase 4 catalytic subunit OS=Homo sapiens GN=PPP4C PE=1 SV=1	0.098009	0.449496	0.703941	enriched no hit	FALSE
TARS	P26639|P26639-2	Threonine--tRNA ligase, cytoplasmic OS=Homo sapiens GN=TARS PE=1 SV=3|Isoform 2 of Threonine--tRNA ligase, cytoplasmic OS=Homo sapiens GN=TARS	0.0980044	0.299001	0.586086	no hit	FALSE
NFXL1	Q6ZNB6	NF-X1-type zinc finger protein NFXL1 OS=Homo sapiens GN=NFXL1 PE=1 SV=2	0.0975737	0.452311	0.706324	no hit	FALSE
RETSAT	Q6NUM9|Q6NUM9-2	All-trans-retinol 13,14-reductase OS=Homo sapiens GN=RETSAT PE=1 SV=2|Isoform 2 of All-trans-retinol 13,14-reductase OS=Homo sapiens GN=RETSAT	0.0972912	0.297211	0.583668	no hit	FALSE
YOD1	Q5VVQ6|Q5VVQ6-2	Isoform 2 of Ubiquitin thioesterase OTU1 OS=Homo sapiens GN=YOD1|Ubiquitin thioesterase OTU1 OS=Homo sapiens GN=YOD1 PE=1 SV=1	0.0972832	0.326379	0.605682	no hit	FALSE
CEP350	Q5VT06	Centrosome-associated protein 350 OS=Homo sapiens GN=CEP350 PE=1 SV=1	0.0972184	0.356644	0.633325	no hit	FALSE
EP400	Q96L91|Q96L91-2|Q96L91-3|Q96L91-4|Q96L91-5	E1A-binding protein p400 OS=Homo sapiens GN=EP400 PE=1 SV=4|Isoform 2 of E1A-binding protein p400 OS=Homo sapiens GN=EP400|Isoform 3 of E1A-binding protein p400 OS=Homo sapiens GN=EP400|Isoform 4 of E1A-binding protein p400 OS=Homo sapiens GN=EP400|Isoform 5 of E1A-binding protein p400 OS=Homo sapiens GN=EP400	0.0971505	0.306026	0.589217	no hit	FALSE
AMMECR1L	Q6DCA0	AMMECR1-like protein OS=Homo sapiens GN=AMMECR1L PE=1 SV=1	0.0969871	0.555809	0.777638	no hit	FALSE
CORO1C	Q9ULV4|Q9ULV4-2|Q9ULV4-3	Coronin-1C OS=Homo sapiens GN=CORO1C PE=1 SV=1|Isoform 2 of Coronin-1C OS=Homo sapiens GN=CORO1C|Isoform 3 of Coronin-1C OS=Homo sapiens GN=CORO1C	0.096803	0.359176	0.63486	no hit	FALSE
TTC27	Q6P3X3	Tetratricopeptide repeat protein 27 OS=Homo sapiens GN=TTC27 PE=1 SV=1	0.0965765	0.303385	0.588991	no hit	FALSE
TRMT2A	F2Z2W7|Q8IZ69|Q8IZ69-2	tRNA (uracil-5-)-methyltransferase homolog A OS=Homo sapiens GN=TRMT2A PE=1 SV=1|tRNA (uracil-5-)-methyltransferase homolog A OS=Homo sapiens GN=TRMT2A PE=1 SV=2|Isoform 2 of tRNA (uracil-5-)-methyltransferase homolog A OS=Homo sapiens GN=TRMT2A	0.0965067	0.418493	0.681186	no hit	FALSE
ABCC5	O15440|O15440-5	Multidrug resistance-associated protein 5 OS=Homo sapiens GN=ABCC5 PE=1 SV=2|Isoform 5 of Multidrug resistance-associated protein 5 OS=Homo sapiens GN=ABCC5	0.0964672	0.307464	0.590541	no hit	FALSE
IFT122	Q9HBG6|Q9HBG6-10|Q9HBG6-3|Q9HBG6-4|Q9HBG6-5|Q9HBG6-6|Q9HBG6-7|Q9HBG6-8|Q9HBG6-9	Intraflagellar transport protein 122 homolog OS=Homo sapiens GN=IFT122 PE=1 SV=2|Isoform 10 of Intraflagellar transport protein 122 homolog OS=Homo sapiens GN=IFT122|Isoform 3 of Intraflagellar transport protein 122 homolog OS=Homo sapiens GN=IFT122|Isoform 4 of Intraflagellar transport protein 122 homolog OS=Homo sapiens GN=IFT122|Isoform 5 of Intraflagellar transport protein 122 homolog OS=Homo…	0.0960235	0.489496	0.733426	enriched no hit	FALSE
UPF1	Q92900|Q92900-2	Regulator of nonsense transcripts 1 OS=Homo sapiens GN=UPF1 PE=1 SV=2|Isoform 2 of Regulator of nonsense transcripts 1 OS=Homo sapiens GN=UPF1	0.0957994	0.300506	0.587685	no hit	FALSE
PGM3	A0A087WT27|J3KN95|O95394|O95394-3|O95394-4	Isoform 2 of Phosphoacetylglucosamine mutase OS=Homo sapiens GN=PGM3|Isoform 3 of Phosphoacetylglucosamine mutase OS=Homo sapiens GN=PGM3|Phosphoacetylglucosamine mutase OS=Homo sapiens GN=PGM3 PE=1 SV=1	0.09574	0.30194	0.58769	no hit	FALSE
SLC1A4	P43007	Neutral amino acid transporter A OS=Homo sapiens GN=SLC1A4 PE=1 SV=1	0.0955384	0.391638	0.657534	no hit	FALSE
SAMHD1	Q9Y3Z3|Q9Y3Z3-3	Deoxynucleoside triphosphate triphosphohydrolase SAMHD1 OS=Homo sapiens GN=SAMHD1 PE=1 SV=2|Isoform 3 of Deoxynucleoside triphosphate triphosphohydrolase SAMHD1 OS=Homo sapiens GN=SAMHD1	0.0953385	0.438387	0.695587	no hit	FALSE
ACBD3	Q9H3P7	Golgi resident protein GCP60 OS=Homo sapiens GN=ACBD3 PE=1 SV=4	0.0952549	0.374635	0.643012	no hit	FALSE
ECD	O95905|O95905-2|O95905-3	Isoform 2 of Protein ecdysoneless homolog OS=Homo sapiens GN=ECD|Isoform 3 of Protein ecdysoneless homolog OS=Homo sapiens GN=ECD|Protein ecdysoneless homolog OS=Homo sapiens GN=ECD PE=1 SV=1	0.095146	0.409402	0.67172	no hit	FALSE
SLC7A5	Q01650	Large neutral amino acids transporter small subunit 1 OS=Homo sapiens GN=SLC7A5 PE=1 SV=2	0.0949968	0.444269	0.700743	no hit	FALSE
MED16	B9TWZ6|Q9Y2X0|Q9Y2X0-2|Q9Y2X0-3|Q9Y2X0-4|Q9Y2X0-5|U3KQ43	Isoform 2 of Mediator of RNA polymerase II transcription subunit 16 OS=Homo sapiens GN=MED16|Isoform 3 of Mediator of RNA polymerase II transcription subunit 16 OS=Homo sapiens GN=MED16|Isoform 4 of Mediator of RNA polymerase II transcription subunit 16 OS=Homo sapiens GN=MED16|Isoform 5 of Mediator of RNA polymerase II transcription subunit 16 OS=Homo sapiens GN=MED16|Mediator complex subunit ME…	0.0949681	0.501813	0.742693	no hit	FALSE
KLHL7	Q8IXQ5|Q8IXQ5-2|Q8IXQ5-5	Kelch-like protein 7 OS=Homo sapiens GN=KLHL7 PE=1 SV=2|Isoform 2 of Kelch-like protein 7 OS=Homo sapiens GN=KLHL7|Isoform 5 of Kelch-like protein 7 OS=Homo sapiens GN=KLHL7	0.0945915	0.396442	0.660993	no hit	FALSE
SUN1	E9PHI4|O94901|O94901-8|O94901-9	Isoform 8 of SUN domain-containing protein 1 OS=Homo sapiens GN=SUN1|Isoform 9 of SUN domain-containing protein 1 OS=Homo sapiens GN=SUN1|SUN domain-containing protein 1 OS=Homo sapiens GN=SUN1 PE=1 SV=1|SUN domain-containing protein 1 OS=Homo sapiens GN=SUN1 PE=1 SV=3	0.0943217	0.477414	0.726354	no hit	FALSE
WDR62	O43379|O43379-4	WD repeat-containing protein 62 OS=Homo sapiens GN=WDR62 PE=1 SV=4|Isoform 4 of WD repeat-containing protein 62 OS=Homo sapiens GN=WDR62	0.0942664	0.502391	0.743199	no hit	FALSE
PPP2CA	P67775|P67775-2	Serine/threonine-protein phosphatase 2A catalytic subunit alpha isoform OS=Homo sapiens GN=PPP2CA PE=1 SV=1|Isoform 2 of Serine/threonine-protein phosphatase 2A catalytic subunit alpha isoform OS=Homo sapiens GN=PPP2CA	0.0940638	0.555722	0.777638	no hit	FALSE
SUZ12	J3QQW9|Q15022	Polycomb protein SUZ12 OS=Homo sapiens GN=SUZ12 PE=1 SV=1|Polycomb protein SUZ12 OS=Homo sapiens GN=SUZ12 PE=1 SV=3	0.0938905	0.372369	0.642856	no hit	FALSE
NSUN2	Q08J23|Q08J23-2	Isoform 2 of tRNA (cytosine(34)-C(5))-methyltransferase OS=Homo sapiens GN=NSUN2|tRNA (cytosine(34)-C(5))-methyltransferase OS=Homo sapiens GN=NSUN2 PE=1 SV=2	0.0937135	0.255178	0.540636	no hit	FALSE
GMDS	O60547|O60547-2	GDP-mannose 4,6 dehydratase OS=Homo sapiens GN=GMDS PE=1 SV=1|Isoform 2 of GDP-mannose 4,6 dehydratase OS=Homo sapiens GN=GMDS	0.093566	0.408527	0.67098	no hit	FALSE
TRIM11	Q96F44|Q96F44-3|R4GMV1	E3 ubiquitin-protein ligase TRIM11 OS=Homo sapiens GN=TRIM11 PE=1 SV=1|E3 ubiquitin-protein ligase TRIM11 OS=Homo sapiens GN=TRIM11 PE=1 SV=2|Isoform 3 of E3 ubiquitin-protein ligase TRIM11 OS=Homo sapiens GN=TRIM11	0.0933419	0.496683	0.73997	no hit	FALSE
RAB3GAP1	Q15042|Q15042-3|Q15042-4	Isoform 2 of Rab3 GTPase-activating protein catalytic subunit OS=Homo sapiens GN=RAB3GAP1|Isoform 3 of Rab3 GTPase-activating protein catalytic subunit OS=Homo sapiens GN=RAB3GAP1|Rab3 GTPase-activating protein catalytic subunit OS=Homo sapiens GN=RAB3GAP1 PE=1 SV=3	0.0932908	0.316858	0.598036	no hit	FALSE
EPB41	P11171|P11171-2	Isoform 2 of Protein 4.1 OS=Homo sapiens GN=EPB41|Protein 4.1 OS=Homo sapiens GN=EPB41 PE=1 SV=4	0.0928835	0.307179	0.590453	no hit	FALSE
CCDC93	F8W9X7|Q567U6	Coiled-coil domain-containing protein 93 OS=Homo sapiens GN=CCDC93 PE=1 SV=1|Coiled-coil domain-containing protein 93 OS=Homo sapiens GN=CCDC93 PE=1 SV=2	0.0928732	0.376635	0.644374	no hit	FALSE
VRK1	Q99986	Serine/threonine-protein kinase VRK1 OS=Homo sapiens GN=VRK1 PE=1 SV=1	0.0925333	0.550654	0.773521	no hit	FALSE
VPS13C	Q709C8|Q709C8-2|Q709C8-3|Q709C8-4	Isoform 2 of Vacuolar protein sorting-associated protein 13C OS=Homo sapiens GN=VPS13C|Isoform 3 of Vacuolar protein sorting-associated protein 13C OS=Homo sapiens GN=VPS13C|Isoform 4 of Vacuolar protein sorting-associated protein 13C OS=Homo sapiens GN=VPS13C|Vacuolar protein sorting-associated protein 13C OS=Homo sapiens GN=VPS13C PE=1 SV=1	0.0925121	0.328136	0.606397	no hit	FALSE
RAF1	H7C155|P04049|P04049-2	RAF proto-oncogene serine/threonine-protein kinase (Fragment) OS=Homo sapiens GN=RAF1 PE=1 SV=1|RAF proto-oncogene serine/threonine-protein kinase OS=Homo sapiens GN=RAF1 PE=1 SV=1|Isoform 2 of RAF proto-oncogene serine/threonine-protein kinase OS=Homo sapiens GN=RAF1	0.0921562	0.322149	0.602538	no hit	FALSE
GTF3C5	Q9Y5Q8|Q9Y5Q8-2|Q9Y5Q8-3	General transcription factor 3C polypeptide 5 OS=Homo sapiens GN=GTF3C5 PE=1 SV=2|Isoform 2 of General transcription factor 3C polypeptide 5 OS=Homo sapiens GN=GTF3C5|Isoform 3 of General transcription factor 3C polypeptide 5 OS=Homo sapiens GN=GTF3C5	0.0919039	0.345826	0.62391	no hit	FALSE
HSPA4L	O95757	Heat shock 70 kDa protein 4L OS=Homo sapiens GN=HSPA4L PE=1 SV=3	0.0918069	0.310958	0.591121	no hit	FALSE
LEMD3	Q9Y2U8	Inner nuclear membrane protein Man1 OS=Homo sapiens GN=LEMD3 PE=1 SV=2	0.0916185	0.387759	0.655326	no hit	FALSE
CDYL	C9JQG7|Q9Y232|Q9Y232-2|Q9Y232-3|Q9Y232-4	Chromodomain Y-like protein (Fragment) OS=Homo sapiens GN=CDYL PE=1 SV=1|Chromodomain Y-like protein OS=Homo sapiens GN=CDYL PE=1 SV=2|Isoform 2 of Chromodomain Y-like protein OS=Homo sapiens GN=CDYL|Isoform 3 of Chromodomain Y-like protein OS=Homo sapiens GN=CDYL|Isoform 4 of Chromodomain Y-like protein OS=Homo sapiens GN=CDYL	0.0916066	0.414786	0.677229	no hit	FALSE
CMTR1	Q8N1G2	Cap-specific mRNA (nucleoside-2'-O-)-methyltransferase 1 OS=Homo sapiens GN=CMTR1 PE=1 SV=1	0.0915254	0.341797	0.620351	no hit	FALSE
COPS5	Q92905	COP9 signalosome complex subunit 5 OS=Homo sapiens GN=COPS5 PE=1 SV=4	0.0912454	0.498241	0.74124	no hit	FALSE
SAE1	B3KNJ4|Q9UBE0|Q9UBE0-2|Q9UBE0-3	Isoform 2 of SUMO-activating enzyme subunit 1 OS=Homo sapiens GN=SAE1|Isoform 3 of SUMO-activating enzyme subunit 1 OS=Homo sapiens GN=SAE1|SUMO-1 activating enzyme subunit 1, isoform CRA_a OS=Homo sapiens GN=SAE1 PE=1 SV=1|SUMO-activating enzyme subunit 1 OS=Homo sapiens GN=SAE1 PE=1 SV=1	0.0910782	0.396786	0.660993	no hit	FALSE
U2AF2	K7ENG2|P26368|P26368-2	Isoform 2 of Splicing factor U2AF 65 kDa subunit OS=Homo sapiens GN=U2AF2|Splicing factor U2AF 65 kDa subunit OS=Homo sapiens GN=U2AF2 PE=1 SV=1|Splicing factor U2AF 65 kDa subunit OS=Homo sapiens GN=U2AF2 PE=1 SV=4	0.0908825	0.373343	0.642856	no hit	FALSE
DIS3L	Q8TF46|Q8TF46-2|Q8TF46-3|Q8TF46-4	DIS3-like exonuclease 1 OS=Homo sapiens GN=DIS3L PE=1 SV=2|Isoform 2 of DIS3-like exonuclease 1 OS=Homo sapiens GN=DIS3L|Isoform 3 of DIS3-like exonuclease 1 OS=Homo sapiens GN=DIS3L|Isoform 4 of DIS3-like exonuclease 1 OS=Homo sapiens GN=DIS3L	0.0905322	0.600372	0.807679	no hit	FALSE
TRO	G5E9N2|Q12816|Q12816-2	Isoform 2 of Trophinin OS=Homo sapiens GN=TRO|Trophinin OS=Homo sapiens GN=TRO PE=1 SV=1|Trophinin OS=Homo sapiens GN=TRO PE=1 SV=3	0.0905262	0.56458	0.78468	enriched no hit	FALSE
IFT140	Q96RY7	Intraflagellar transport protein 140 homolog OS=Homo sapiens GN=IFT140 PE=1 SV=1	0.0903765	0.460892	0.713318	enriched no hit	FALSE
OGT	O15294|O15294-3	Isoform 1 of UDP-N-acetylglucosamine--peptide N-acetylglucosaminyltransferase 110 kDa subunit OS=Homo sapiens GN=OGT|UDP-N-acetylglucosamine--peptide N-acetylglucosaminyltransferase 110 kDa subunit OS=Homo sapiens GN=OGT PE=1 SV=3	0.0901096	0.543442	0.770748	no hit	FALSE
STX7	O15400|O15400-2	Syntaxin-7 OS=Homo sapiens GN=STX7 PE=1 SV=4|Isoform 2 of Syntaxin-7 OS=Homo sapiens GN=STX7	0.0899797	0.469382	0.719721	no hit	FALSE
PRRC2A	P48634|P48634-2|P48634-3	Isoform 2 of Protein PRRC2A OS=Homo sapiens GN=PRRC2A|Isoform 3 of Protein PRRC2A OS=Homo sapiens GN=PRRC2A|Protein PRRC2A OS=Homo sapiens GN=PRRC2A PE=1 SV=3	0.0899402	0.647032	0.837867	no hit	FALSE
EMC8	M0R1B0|O43402	ER membrane protein complex subunit 8 (Fragment) OS=Homo sapiens GN=EMC8 PE=1 SV=1|ER membrane protein complex subunit 8 OS=Homo sapiens GN=EMC8 PE=1 SV=1	0.0898946	0.402954	0.665786	no hit	FALSE
FOXRED2	Q8IWF2	FAD-dependent oxidoreductase domain-containing protein 2 OS=Homo sapiens GN=FOXRED2 PE=1 SV=1	0.0894821	0.493402	0.737176	no hit	FALSE
EXOC4	Q96A65	Exocyst complex component 4 OS=Homo sapiens GN=EXOC4 PE=1 SV=1	0.0891738	0.368787	0.640502	no hit	FALSE
CCDC85C	A6NKD9	Coiled-coil domain-containing protein 85C OS=Homo sapiens GN=CCDC85C PE=1 SV=1	0.0889218	0.453278	0.707096	no hit	FALSE
DCK	D6RFG8|P27707	Deoxycytidine kinase OS=Homo sapiens GN=DCK PE=1 SV=1|Deoxycytidine kinase OS=Homo sapiens GN=DCK PE=1 SV=1	0.0886429	0.352449	0.630762	no hit	FALSE
CSTF1	Q05048	Cleavage stimulation factor subunit 1 OS=Homo sapiens GN=CSTF1 PE=1 SV=1	0.0884509	0.34463	0.623503	no hit	FALSE
DENND4C	Q5VZ89|Q5VZ89-5|Q5VZ89-6|R4GN35|R4GNB2	DENN domain-containing protein 4C OS=Homo sapiens GN=DENND4C PE=1 SV=1|DENN domain-containing protein 4C OS=Homo sapiens GN=DENND4C PE=1 SV=2|Isoform 5 of DENN domain-containing protein 4C OS=Homo sapiens GN=DENND4C|Isoform 6 of DENN domain-containing protein 4C OS=Homo sapiens GN=DENND4C	0.0883521	0.513325	0.749378	no hit	FALSE
TES	Q9UGI8|Q9UGI8-2	Testin OS=Homo sapiens GN=TES PE=1 SV=1|Isoform 2 of Testin OS=Homo sapiens GN=TES	0.0880437	0.367768	0.64034	no hit	FALSE
HEATR1	Q9H583	HEAT repeat-containing protein 1 OS=Homo sapiens GN=HEATR1 PE=1 SV=3	0.0880194	0.357707	0.634218	no hit	FALSE
ADD2	P35612	Beta-adducin OS=Homo sapiens GN=ADD2 PE=1 SV=3	0.087993	0.41994	0.682703	no hit	FALSE
SUPT16H	Q9Y5B9	FACT complex subunit SPT16 OS=Homo sapiens GN=SUPT16H PE=1 SV=1	0.0879354	0.394139	0.6597	no hit	FALSE
EIF2AK4	H0YME5|Q9P2K8|Q9P2K8-2	eIF-2-alpha kinase GCN2 (Fragment) OS=Homo sapiens GN=EIF2AK4 PE=1 SV=1|eIF-2-alpha kinase GCN2 OS=Homo sapiens GN=EIF2AK4 PE=1 SV=3|Isoform 2 of eIF-2-alpha kinase GCN2 OS=Homo sapiens GN=EIF2AK4	0.0877807	0.334741	0.613178	no hit	FALSE
RAD51C	J3QKK3|O43502	DNA repair protein RAD51 homolog 3 OS=Homo sapiens GN=RAD51C PE=1 SV=1|DNA repair protein RAD51 homolog 3 OS=Homo sapiens GN=RAD51C PE=1 SV=1	0.0877249	0.577855	0.794943	no hit	FALSE
ZNF143	E7EN86|P52747|P52747-2|P52747-3	Zinc finger protein 143 OS=Homo sapiens GN=ZNF143 PE=1 SV=1|Zinc finger protein 143 OS=Homo sapiens GN=ZNF143 PE=1 SV=2|Isoform 2 of Zinc finger protein 143 OS=Homo sapiens GN=ZNF143|Isoform 3 of Zinc finger protein 143 OS=Homo sapiens GN=ZNF143	0.0875667	0.463729	0.715247	no hit	FALSE
RTF1	Q92541	RNA polymerase-associated protein RTF1 homolog OS=Homo sapiens GN=RTF1 PE=1 SV=4	0.0871608	0.554043	0.777147	no hit	FALSE
AKAP9	A0A0A0MRF6|Q99996|Q99996-2|Q99996-3|Q99996-5|Q99996-6	A-kinase anchor protein 9 OS=Homo sapiens GN=AKAP9 PE=1 SV=1|A-kinase anchor protein 9 OS=Homo sapiens GN=AKAP9 PE=1 SV=3|Isoform 2 of A-kinase anchor protein 9 OS=Homo sapiens GN=AKAP9|Isoform 3 of A-kinase anchor protein 9 OS=Homo sapiens GN=AKAP9|Isoform 5 of A-kinase anchor protein 9 OS=Homo sapiens GN=AKAP9|Isoform 6 of A-kinase anchor protein 9 OS=Homo sapiens GN=AKAP9	0.0871132	0.490489	0.733868	no hit	FALSE
EIF3I	Q13347	Eukaryotic translation initiation factor 3 subunit I OS=Homo sapiens GN=EIF3I PE=1 SV=1	0.0864208	0.396848	0.660993	no hit	FALSE
RANGAP1	P46060	Ran GTPase-activating protein 1 OS=Homo sapiens GN=RANGAP1 PE=1 SV=1	0.0863065	0.506406	0.745983	no hit	FALSE
MCM3	P25205|P25205-2	DNA replication licensing factor MCM3 OS=Homo sapiens GN=MCM3 PE=1 SV=3|Isoform 2 of DNA replication licensing factor MCM3 OS=Homo sapiens GN=MCM3	0.0862966	0.398921	0.662692	no hit	FALSE
RBBP4	Q09028|Q09028-3	Histone-binding protein RBBP4 OS=Homo sapiens GN=RBBP4 PE=1 SV=3|Isoform 3 of Histone-binding protein RBBP4 OS=Homo sapiens GN=RBBP4	0.08629	0.501362	0.742693	no hit	FALSE
SHC1	P29353|P29353-2|P29353-3|P29353-6|P29353-7	SHC-transforming protein 1 OS=Homo sapiens GN=SHC1 PE=1 SV=4|Isoform p52Shc of SHC-transforming protein 1 OS=Homo sapiens GN=SHC1|Isoform p46Shc of SHC-transforming protein 1 OS=Homo sapiens GN=SHC1|Isoform 6 of SHC-transforming protein 1 OS=Homo sapiens GN=SHC1|Isoform 7 of SHC-transforming protein 1 OS=Homo sapiens GN=SHC1	0.085898	0.365321	0.638551	no hit	FALSE
SH3BP4	Q9P0V3|Q9P0V3-2	Isoform 2 of SH3 domain-binding protein 4 OS=Homo sapiens GN=SH3BP4|SH3 domain-binding protein 4 OS=Homo sapiens GN=SH3BP4 PE=1 SV=1	0.0858426	0.388056	0.655365	no hit	FALSE
MMS19	Q96T76|Q96T76-5|Q96T76-8|Q96T76-9	Isoform 4 of MMS19 nucleotide excision repair protein homolog OS=Homo sapiens GN=MMS19|Isoform 5 of MMS19 nucleotide excision repair protein homolog OS=Homo sapiens GN=MMS19|Isoform 6 of MMS19 nucleotide excision repair protein homolog OS=Homo sapiens GN=MMS19|MMS19 nucleotide excision repair protein homolog OS=Homo sapiens GN=MMS19 PE=1 SV=2	0.0858075	0.444329	0.700743	no hit	FALSE
EIF4G2	D3DQV9|H0Y3P2|P78344|P78344-2	Eukaryotic translation initiation factor 4 gamma 2 (Fragment) OS=Homo sapiens GN=EIF4G2 PE=1 SV=1|Eukaryotic translation initiation factor 4 gamma 2 OS=Homo sapiens GN=EIF4G2 PE=1 SV=1|Eukaryotic translation initiation factor 4 gamma 2 OS=Homo sapiens GN=EIF4G2 PE=1 SV=1|Isoform 2 of Eukaryotic translation initiation factor 4 gamma 2 OS=Homo sapiens GN=EIF4G2	0.0857674	0.349196	0.626688	no hit	FALSE
IKBKAP	O95163	Elongator complex protein 1 OS=Homo sapiens GN=IKBKAP PE=1 SV=3	0.0854046	0.282847	0.568427	no hit	FALSE
WBSCR16	Q96I51|Q96I51-2|Q96I51-3	Isoform 2 of Williams-Beuren syndrome chromosomal region 16 protein OS=Homo sapiens GN=WBSCR16|Isoform 3 of Williams-Beuren syndrome chromosomal region 16 protein OS=Homo sapiens GN=WBSCR16|Williams-Beuren syndrome chromosomal region 16 protein OS=Homo sapiens GN=WBSCR16 PE=1 SV=2	0.0853463	0.3786	0.645435	no hit	FALSE
NSMCE1	H3BV05|I3L1I3|Q8WV22	Non-structural maintenance of chromosomes element 1 homolog (Fragment) OS=Homo sapiens GN=NSMCE1 PE=1 SV=1|Non-structural maintenance of chromosomes element 1 homolog OS=Homo sapiens GN=NSMCE1 PE=1 SV=5	0.085315	0.426143	0.68703	no hit	FALSE
ACLY	P53396|P53396-2	ATP-citrate synthase OS=Homo sapiens GN=ACLY PE=1 SV=3|Isoform 2 of ATP-citrate synthase OS=Homo sapiens GN=ACLY	0.0852148	0.423943	0.685121	no hit	FALSE
PPP5C	H0YDU8|P53041	Serine/threonine-protein phosphatase (Fragment) OS=Homo sapiens GN=PPP5C PE=1 SV=1|Serine/threonine-protein phosphatase 5 OS=Homo sapiens GN=PPP5C PE=1 SV=1	0.0842487	0.669223	0.851887	no hit	FALSE
ERCC6L	Q2NKX8	DNA excision repair protein ERCC-6-like OS=Homo sapiens GN=ERCC6L PE=1 SV=1	0.0839811	0.357805	0.634218	no hit	FALSE
YES1	J3QRU1|P07947	Tyrosine-protein kinase OS=Homo sapiens GN=YES1 PE=1 SV=1|Tyrosine-protein kinase Yes OS=Homo sapiens GN=YES1 PE=1 SV=3	0.0838326	0.414748	0.677229	no hit	FALSE
CTDSPL2	Q05D32|Q05D32-2	CTD small phosphatase-like protein 2 OS=Homo sapiens GN=CTDSPL2 PE=1 SV=2|Isoform 2 of CTD small phosphatase-like protein 2 OS=Homo sapiens GN=CTDSPL2	0.0837058	0.470126	0.720174	no hit	FALSE
ANKRD17	H0YM23|O75179|O75179-2|O75179-6|O75179-7	Ankyrin repeat domain-containing protein 17 (Fragment) OS=Homo sapiens GN=ANKRD17 PE=1 SV=1|Ankyrin repeat domain-containing protein 17 OS=Homo sapiens GN=ANKRD17 PE=1 SV=3|Isoform 2 of Ankyrin repeat domain-containing protein 17 OS=Homo sapiens GN=ANKRD17|Isoform 6 of Ankyrin repeat domain-containing protein 17 OS=Homo sapiens GN=ANKRD17|Isoform 7 of Ankyrin repeat domain-containing protein 17 O…	0.0835203	0.497461	0.740429	no hit	FALSE
HSPD1	P10809	60 kDa heat shock protein, mitochondrial OS=Homo sapiens GN=HSPD1 PE=1 SV=2	0.0833081	0.76601	0.908157	no hit	FALSE
LYN	P07948|P07948-2	Tyrosine-protein kinase Lyn OS=Homo sapiens GN=LYN PE=1 SV=3|Isoform 2 of Tyrosine-protein kinase Lyn OS=Homo sapiens GN=LYN	0.0832196	0.533197	0.762956	no hit	FALSE
SLC25A44	E9PGQ0|Q96H78	Solute carrier family 25 member 44 OS=Homo sapiens GN=SLC25A44 PE=1 SV=3|Solute carrier family 25 member 44 OS=Homo sapiens GN=SLC25A44 PE=2 SV=1	0.0830421	0.602881	0.809384	no hit	FALSE
ATP6V1E1	P36543|P36543-3	V-type proton ATPase subunit E 1 OS=Homo sapiens GN=ATP6V1E1 PE=1 SV=1|Isoform 3 of V-type proton ATPase subunit E 1 OS=Homo sapiens GN=ATP6V1E1	0.0829978	0.494396	0.73761	no hit	FALSE
PRMT5	O14744|O14744-2|O14744-3|O14744-5	Isoform 2 of Protein arginine N-methyltransferase 5 OS=Homo sapiens GN=PRMT5|Isoform 3 of Protein arginine N-methyltransferase 5 OS=Homo sapiens GN=PRMT5|Isoform 5 of Protein arginine N-methyltransferase 5 OS=Homo sapiens GN=PRMT5|Protein arginine N-methyltransferase 5 OS=Homo sapiens GN=PRMT5 PE=1 SV=4	0.0828987	0.438176	0.695587	no hit	FALSE
FOXK1	P85037|P85037-2	Forkhead box protein K1 OS=Homo sapiens GN=FOXK1 PE=1 SV=1|Isoform 2 of Forkhead box protein K1 OS=Homo sapiens GN=FOXK1	0.0828187	0.468599	0.719721	no hit	FALSE
MLF2	Q15773	Myeloid leukemia factor 2 OS=Homo sapiens GN=MLF2 PE=1 SV=1	0.0827912	0.595305	0.803852	no hit	FALSE
AHCYL1	O43865	Adenosylhomocysteinase 2 OS=Homo sapiens GN=AHCYL1 PE=1 SV=2	0.082758	0.41041	0.671852	no hit	FALSE
RANBP2	P49792	E3 SUMO-protein ligase RanBP2 OS=Homo sapiens GN=RANBP2 PE=1 SV=2	0.0825711	0.461519	0.713736	no hit	FALSE
RPL38	P63173	60S ribosomal protein L38 OS=Homo sapiens GN=RPL38 PE=1 SV=2	0.0825705	0.450905	0.704949	no hit	FALSE
EPB41L3	Q9Y2J2-2	Isoform 2 of Band 4.1-like protein 3 OS=Homo sapiens GN=EPB41L3	0.0825676	0.366754	0.639717	no hit	FALSE
LCHN	A4D1U4	Protein LCHN OS=Homo sapiens GN=LCHN PE=2 SV=1	0.082157	0.566242	0.785263	no hit	FALSE
NCK1	C9JAB9|P16333|P16333-2	Cytoplasmic protein NCK1 (Fragment) OS=Homo sapiens GN=NCK1 PE=1 SV=1|Cytoplasmic protein NCK1 OS=Homo sapiens GN=NCK1 PE=1 SV=1|Isoform 2 of Cytoplasmic protein NCK1 OS=Homo sapiens GN=NCK1	0.0817725	0.45784	0.710691	no hit	FALSE
CLUH	I3L2B0|O75153	Clustered mitochondria protein homolog (Fragment) OS=Homo sapiens GN=CLUH PE=1 SV=2|Clustered mitochondria protein homolog OS=Homo sapiens GN=CLUH PE=1 SV=2	0.0814724	0.453515	0.707115	no hit	FALSE
YKT6	O15498	Synaptobrevin homolog YKT6 OS=Homo sapiens GN=YKT6 PE=1 SV=1	0.0814447	0.530285	0.761043	no hit	FALSE
SH3D19	A0A0U1RQE4|Q5HYK7|Q5HYK7-2|Q5HYK7-3	Isoform 2 of SH3 domain-containing protein 19 OS=Homo sapiens GN=SH3D19|Isoform 3 of SH3 domain-containing protein 19 OS=Homo sapiens GN=SH3D19|SH3 domain-containing protein 19 OS=Homo sapiens GN=SH3D19 PE=1 SV=1|SH3 domain-containing protein 19 OS=Homo sapiens GN=SH3D19 PE=1 SV=2	0.0809434	0.672543	0.853007	no hit	FALSE
WDR33	Q9C0J8	pre-mRNA 3' end processing protein WDR33 OS=Homo sapiens GN=WDR33 PE=1 SV=2	0.0808211	0.501355	0.742693	no hit	FALSE
ETF1	B7Z7P8|P62495|P62495-2	Eukaryotic peptide chain release factor subunit 1 OS=Homo sapiens GN=ETF1 PE=1 SV=1|Eukaryotic peptide chain release factor subunit 1 OS=Homo sapiens GN=ETF1 PE=1 SV=3|Isoform 2 of Eukaryotic peptide chain release factor subunit 1 OS=Homo sapiens GN=ETF1	0.080618	0.521247	0.755124	no hit	FALSE
LTV1	Q96GA3	Protein LTV1 homolog OS=Homo sapiens GN=LTV1 PE=1 SV=1	0.0800576	0.42892	0.687495	no hit	FALSE
TTC28	A0A087WW06|Q96AY4	Tetratricopeptide repeat protein 28 OS=Homo sapiens GN=TTC28 PE=1 SV=1|Tetratricopeptide repeat protein 28 OS=Homo sapiens GN=TTC28 PE=1 SV=4	0.0799579	0.436941	0.694342	no hit	FALSE
PSMD12	O00232|O00232-2	26S proteasome non-ATPase regulatory subunit 12 OS=Homo sapiens GN=PSMD12 PE=1 SV=3|Isoform 2 of 26S proteasome non-ATPase regulatory subunit 12 OS=Homo sapiens GN=PSMD12	0.0790992	0.378352	0.645435	no hit	FALSE
HCFC1	A6NEM2|P51610|P51610-2|P51610-4	Host cell factor 1 OS=Homo sapiens GN=HCFC1 PE=1 SV=2|Host cell factor 1 OS=Homo sapiens GN=HCFC1 PE=1 SV=2|Isoform 2 of Host cell factor 1 OS=Homo sapiens GN=HCFC1|Isoform 4 of Host cell factor 1 OS=Homo sapiens GN=HCFC1	0.0787876	0.529741	0.760777	no hit	FALSE
ADD1	E7ENY0|E7EV99|P35611|P35611-2|P35611-3|P35611-6	Alpha-adducin OS=Homo sapiens GN=ADD1 PE=1 SV=1|Alpha-adducin OS=Homo sapiens GN=ADD1 PE=1 SV=1|Alpha-adducin OS=Homo sapiens GN=ADD1 PE=1 SV=2|Isoform 2 of Alpha-adducin OS=Homo sapiens GN=ADD1|Isoform 3 of Alpha-adducin OS=Homo sapiens GN=ADD1|Isoform 6 of Alpha-adducin OS=Homo sapiens GN=ADD1	0.0787223	0.416901	0.679298	no hit	FALSE
EIF2S2	P20042	Eukaryotic translation initiation factor 2 subunit 2 OS=Homo sapiens GN=EIF2S2 PE=1 SV=2	0.0786588	0.435343	0.693221	no hit	FALSE
CHD1L	A0A087WTM4|A0A0A0MSH9|Q86WJ1|Q86WJ1-2|Q86WJ1-3	Chromodomain-helicase-DNA-binding protein 1-like OS=Homo sapiens GN=CHD1L PE=1 SV=1|Chromodomain-helicase-DNA-binding protein 1-like OS=Homo sapiens GN=CHD1L PE=1 SV=2|Isoform 2 of Chromodomain-helicase-DNA-binding protein 1-like OS=Homo sapiens GN=CHD1L|Isoform 3 of Chromodomain-helicase-DNA-binding protein 1-like OS=Homo sapiens GN=CHD1L	0.0785968	0.345105	0.623646	no hit	FALSE
PABPC1	A0A087WTT1|E7EQV3|E7ERJ7|P11940|P11940-2	Isoform 2 of Polyadenylate-binding protein 1 OS=Homo sapiens GN=PABPC1|Polyadenylate-binding protein 1 OS=Homo sapiens GN=PABPC1 PE=1 SV=2|Polyadenylate-binding protein OS=Homo sapiens GN=PABPC1 PE=1 SV=1	0.0785959	0.635353	0.831896	no hit	FALSE
TTC4	O95801	Tetratricopeptide repeat protein 4 OS=Homo sapiens GN=TTC4 PE=1 SV=3	0.0784921	0.527096	0.759405	no hit	FALSE
LRRC49	Q8IUZ0|Q8IUZ0-2|Q8IUZ0-4	Leucine-rich repeat-containing protein 49 OS=Homo sapiens GN=LRRC49 PE=2 SV=2|Isoform 2 of Leucine-rich repeat-containing protein 49 OS=Homo sapiens GN=LRRC49|Isoform 4 of Leucine-rich repeat-containing protein 49 OS=Homo sapiens GN=LRRC49	0.0783745	0.565852	0.785263	no hit	FALSE
EED	O75530|O75530-2|O75530-3	Isoform 2 of Polycomb protein EED OS=Homo sapiens GN=EED|Isoform 3 of Polycomb protein EED OS=Homo sapiens GN=EED|Polycomb protein EED OS=Homo sapiens GN=EED PE=1 SV=2	0.0782925	0.462086	0.714112	no hit	FALSE
NEURL4	I3L100|I3L2W2|Q96JN8|Q96JN8-2	Neuralized-like protein 4 (Fragment) OS=Homo sapiens GN=NEURL4 PE=1 SV=7|Neuralized-like protein 4 OS=Homo sapiens GN=NEURL4 PE=1 SV=1|Neuralized-like protein 4 OS=Homo sapiens GN=NEURL4 PE=1 SV=2|Isoform 2 of Neuralized-like protein 4 OS=Homo sapiens GN=NEURL4	0.0782546	0.507273	0.746395	no hit	FALSE
AFF4	Q9UHB7	AF4/FMR2 family member 4 OS=Homo sapiens GN=AFF4 PE=1 SV=1	0.077842	0.639717	0.833194	no hit	FALSE
GOLGB1	Q14789|Q14789-2|Q14789-3|Q14789-4	Golgin subfamily B member 1 OS=Homo sapiens GN=GOLGB1 PE=1 SV=2|Isoform 2 of Golgin subfamily B member 1 OS=Homo sapiens GN=GOLGB1|Isoform 3 of Golgin subfamily B member 1 OS=Homo sapiens GN=GOLGB1|Isoform 4 of Golgin subfamily B member 1 OS=Homo sapiens GN=GOLGB1	0.0778162	0.545553	0.770748	no hit	FALSE
CENPB	P07199	Major centromere autoantigen B OS=Homo sapiens GN=CENPB PE=1 SV=2	0.0776072	0.595155	0.803852	no hit	FALSE
PSMD3	O43242	26S proteasome non-ATPase regulatory subunit 3 OS=Homo sapiens GN=PSMD3 PE=1 SV=2	0.0775752	0.403258	0.665786	no hit	FALSE
PRKAA1	Q13131|Q13131-2	5'-AMP-activated protein kinase catalytic subunit alpha-1 OS=Homo sapiens GN=PRKAA1 PE=1 SV=4|Isoform 2 of 5'-AMP-activated protein kinase catalytic subunit alpha-1 OS=Homo sapiens GN=PRKAA1	0.0775463	0.523421	0.75688	no hit	FALSE
EPHA7	Q15375|Q15375-2|Q15375-4	Ephrin type-A receptor 7 OS=Homo sapiens GN=EPHA7 PE=1 SV=3|Isoform 2 of Ephrin type-A receptor 7 OS=Homo sapiens GN=EPHA7|Isoform 4 of Ephrin type-A receptor 7 OS=Homo sapiens GN=EPHA7	0.0772512	0.375719	0.643505	no hit	FALSE
RELA	A0A087X0W8|E9PKH5|Q04206|Q04206-2|Q04206-3|Q2TAM5	Isoform 2 of Transcription factor p65 OS=Homo sapiens GN=RELA|Isoform 3 of Transcription factor p65 OS=Homo sapiens GN=RELA|RELA protein OS=Homo sapiens GN=RELA PE=1 SV=1|Transcription factor p65 (Fragment) OS=Homo sapiens GN=RELA PE=1 SV=1|Transcription factor p65 OS=Homo sapiens GN=RELA PE=1 SV=1|Transcription factor p65 OS=Homo sapiens GN=RELA PE=1 SV=2	0.0767214	0.437673	0.695153	no hit	FALSE
EDC3	H3BPN4|Q96F86	Enhancer of mRNA-decapping protein 3 (Fragment) OS=Homo sapiens GN=EDC3 PE=1 SV=1|Enhancer of mRNA-decapping protein 3 OS=Homo sapiens GN=EDC3 PE=1 SV=1	0.076502	0.509429	0.747448	no hit	FALSE
STIL	A0A0A0MR87|E9PSF2|Q15468|Q15468-2	SCL-interrupting locus protein OS=Homo sapiens GN=STIL PE=1 SV=1|SCL-interrupting locus protein OS=Homo sapiens GN=STIL PE=1 SV=1|SCL-interrupting locus protein OS=Homo sapiens GN=STIL PE=1 SV=2|Isoform 2 of SCL-interrupting locus protein OS=Homo sapiens GN=STIL	0.0764923	0.683744	0.859938	no hit	FALSE
UBR3	Q6ZT12|Q6ZT12-4	E3 ubiquitin-protein ligase UBR3 OS=Homo sapiens GN=UBR3 PE=2 SV=2|Isoform 4 of E3 ubiquitin-protein ligase UBR3 OS=Homo sapiens GN=UBR3	0.0764886	0.704623	0.869864	no hit	FALSE
KIF20A	O95235	Kinesin-like protein KIF20A OS=Homo sapiens GN=KIF20A PE=1 SV=1	0.0762684	0.452787	0.70668	no hit	FALSE
EXOC7	A0A0A0MRE1|A0A0A0MSB8|B4DJ07|Q9UPT5|Q9UPT5-1|Q9UPT5-2|Q9UPT5-5|Q9UPT5-6	Exocyst complex component 7 (Fragment) OS=Homo sapiens GN=EXOC7 PE=1 SV=1|Exocyst complex component 7 OS=Homo sapiens GN=EXOC7 PE=1 SV=1|Exocyst complex component 7 OS=Homo sapiens GN=EXOC7 PE=1 SV=3|Isoform 1 of Exocyst complex component 7 OS=Homo sapiens GN=EXOC7|Isoform 2 of Exocyst complex component 7 OS=Homo sapiens GN=EXOC7|Isoform 5 of Exocyst complex component 7 OS=Homo sapiens GN=EXOC7|I…	0.0761419	0.451006	0.704949	no hit	FALSE
CCT7	Q99832|Q99832-3	Isoform 3 of T-complex protein 1 subunit eta OS=Homo sapiens GN=CCT7|T-complex protein 1 subunit eta OS=Homo sapiens GN=CCT7 PE=1 SV=2	0.0761313	0.432854	0.690986	no hit	FALSE
GGA2	Q9UJY4	ADP-ribosylation factor-binding protein GGA2 OS=Homo sapiens GN=GGA2 PE=1 SV=3	0.0761292	0.657731	0.844536	no hit	FALSE
RBBP5	Q15291|Q15291-2	Isoform 2 of Retinoblastoma-binding protein 5 OS=Homo sapiens GN=RBBP5|Retinoblastoma-binding protein 5 OS=Homo sapiens GN=RBBP5 PE=1 SV=2	0.0759917	0.516028	0.751949	no hit	FALSE
MYO1D	J3QRN6|O94832	Unconventional myosin-Id OS=Homo sapiens GN=MYO1D PE=1 SV=1|Unconventional myosin-Id OS=Homo sapiens GN=MYO1D PE=1 SV=2	0.0759025	0.400496	0.663427	no hit	FALSE
SCARB1	B7ZKQ9|F5H4X0|Q8WTV0|Q8WTV0-2|Q8WTV0-3|Q8WTV0-4|Q8WTV0-5	Isoform 1 of Scavenger receptor class B member 1 OS=Homo sapiens GN=SCARB1|Isoform 2 of Scavenger receptor class B member 1 OS=Homo sapiens GN=SCARB1|Isoform 4 of Scavenger receptor class B member 1 OS=Homo sapiens GN=SCARB1|Isoform 5 of Scavenger receptor class B member 1 OS=Homo sapiens GN=SCARB1|SCARB1 protein OS=Homo sapiens GN=SCARB1 PE=1 SV=1|Scavenger receptor class B member 1 OS=Homo sapi…	0.0755808	0.610706	0.814275	no hit	FALSE
MYH9	P35579	Myosin-9 OS=Homo sapiens GN=MYH9 PE=1 SV=4	0.0754691	0.558702	0.780175	no hit	FALSE
PKMYT1	Q99640|Q99640-3	Membrane-associated tyrosine- and threonine-specific cdc2-inhibitory kinase OS=Homo sapiens GN=PKMYT1 PE=1 SV=1|Isoform 3 of Membrane-associated tyrosine- and threonine-specific cdc2-inhibitory kinase OS=Homo sapiens GN=PKMYT1	0.0752562	0.603438	0.809384	no hit	FALSE
HSPA14	Q0VDF9	Heat shock 70 kDa protein 14 OS=Homo sapiens GN=HSPA14 PE=1 SV=1	0.0751944	0.466473	0.718775	no hit	FALSE
POGZ	Q7Z3K3|Q7Z3K3-2|Q7Z3K3-3|Q7Z3K3-5|Q7Z3K3-6|Q7Z3K3-7	Pogo transposable element with ZNF domain OS=Homo sapiens GN=POGZ PE=1 SV=2|Isoform 2 of Pogo transposable element with ZNF domain OS=Homo sapiens GN=POGZ|Isoform 3 of Pogo transposable element with ZNF domain OS=Homo sapiens GN=POGZ|Isoform 5 of Pogo transposable element with ZNF domain OS=Homo sapiens GN=POGZ|Isoform 6 of Pogo transposable element with ZNF domain OS=Homo sapiens GN=POGZ|Isoform…	0.0750869	0.416534	0.679053	no hit	FALSE
CUL1	A0A0C4DGX4|Q13616	Cullin-1 OS=Homo sapiens GN=CUL1 PE=1 SV=1|Cullin-1 OS=Homo sapiens GN=CUL1 PE=1 SV=2	0.0750762	0.598619	0.80601	no hit	FALSE
DYNC1LI2	O43237|O43237-2	Cytoplasmic dynein 1 light intermediate chain 2 OS=Homo sapiens GN=DYNC1LI2 PE=1 SV=1|Isoform 2 of Cytoplasmic dynein 1 light intermediate chain 2 OS=Homo sapiens GN=DYNC1LI2	0.0750666	0.518435	0.75282	no hit	FALSE
CHD8	Q9HCK8|Q9HCK8-2	Chromodomain-helicase-DNA-binding protein 8 OS=Homo sapiens GN=CHD8 PE=1 SV=5|Isoform 2 of Chromodomain-helicase-DNA-binding protein 8 OS=Homo sapiens GN=CHD8	0.0750118	0.549561	0.772634	no hit	FALSE
NUDCD1	Q96RS6|Q96RS6-2|Q96RS6-3	NudC domain-containing protein 1 OS=Homo sapiens GN=NUDCD1 PE=1 SV=2|Isoform 2 of NudC domain-containing protein 1 OS=Homo sapiens GN=NUDCD1|Isoform 3 of NudC domain-containing protein 1 OS=Homo sapiens GN=NUDCD1	0.0749958	0.487268	0.731832	no hit	FALSE
ETAA1	Q9NY74	Ewing's tumor-associated antigen 1 OS=Homo sapiens GN=ETAA1 PE=1 SV=2	0.0743553	0.507634	0.746395	no hit	FALSE
ABCE1	P61221	ATP-binding cassette sub-family E member 1 OS=Homo sapiens GN=ABCE1 PE=1 SV=1	0.0743367	0.390094	0.655992	no hit	FALSE
RPS9	A0A024R4M0|P46781	40S ribosomal protein S9 OS=Homo sapiens GN=RPS9 PE=1 SV=1|40S ribosomal protein S9 OS=Homo sapiens GN=RPS9 PE=1 SV=3	0.0743338	0.449805	0.703941	no hit	FALSE
TRIP10	M0R2H7|Q15642|Q15642-2|Q15642-3|Q15642-4|Q15642-5|W4VSQ9	Cdc42-interacting protein 4 OS=Homo sapiens GN=TRIP10 PE=1 SV=1|Cdc42-interacting protein 4 OS=Homo sapiens GN=TRIP10 PE=1 SV=3|Isoform 2 of Cdc42-interacting protein 4 OS=Homo sapiens GN=TRIP10|Isoform 3 of Cdc42-interacting protein 4 OS=Homo sapiens GN=TRIP10|Isoform 4 of Cdc42-interacting protein 4 OS=Homo sapiens GN=TRIP10|Isoform 5 of Cdc42-interacting protein 4 OS=Homo sapiens GN=TRIP10	0.0738267	0.436802	0.694342	no hit	FALSE
MFN2	O95140	Mitofusin-2 OS=Homo sapiens GN=MFN2 PE=1 SV=3	0.0734977	0.456293	0.708989	no hit	FALSE
CCT6A	P40227	T-complex protein 1 subunit zeta OS=Homo sapiens GN=CCT6A PE=1 SV=3	0.0734212	0.537616	0.766136	no hit	FALSE
SNX27	Q96L92|Q96L92-3	Sorting nexin-27 OS=Homo sapiens GN=SNX27 PE=1 SV=2|Isoform 2 of Sorting nexin-27 OS=Homo sapiens GN=SNX27	0.0733561	0.423758	0.685121	no hit	FALSE
PSMD7	H3BNT7|H3BTM8|P51665	26S proteasome non-ATPase regulatory subunit 7 OS=Homo sapiens GN=PSMD7 PE=1 SV=1|26S proteasome non-ATPase regulatory subunit 7 OS=Homo sapiens GN=PSMD7 PE=1 SV=2	0.0732142	0.626327	0.825332	no hit	FALSE
PKN2	Q16513|Q16513-2	Serine/threonine-protein kinase N2 OS=Homo sapiens GN=PKN2 PE=1 SV=1|Isoform 2 of Serine/threonine-protein kinase N2 OS=Homo sapiens GN=PKN2	0.072998	0.400101	0.663427	no hit	FALSE
TARDBP	Q13148	TAR DNA-binding protein 43 OS=Homo sapiens GN=TARDBP PE=1 SV=1	0.0728134	0.38779	0.655326	no hit	FALSE
THUMPD3	H7C3J3|Q9BV44	THUMP domain-containing protein 3 (Fragment) OS=Homo sapiens GN=THUMPD3 PE=1 SV=1|THUMP domain-containing protein 3 OS=Homo sapiens GN=THUMPD3 PE=1 SV=1	0.0724398	0.39225	0.65821	no hit	FALSE
RHOG	P84095	Rho-related GTP-binding protein RhoG OS=Homo sapiens GN=RHOG PE=1 SV=1	0.0724082	0.682333	0.859938	no hit	FALSE
RPTOR	Q8N122|Q8N122-3	Regulatory-associated protein of mTOR OS=Homo sapiens GN=RPTOR PE=1 SV=1|Isoform 3 of Regulatory-associated protein of mTOR OS=Homo sapiens GN=RPTOR	0.0721266	0.444531	0.700743	no hit	FALSE
CPSF7	F5H669|Q8N684|Q8N684-2|Q8N684-3	Cleavage and polyadenylation-specificity factor subunit 7 (Fragment) OS=Homo sapiens GN=CPSF7 PE=1 SV=1|Cleavage and polyadenylation specificity factor subunit 7 OS=Homo sapiens GN=CPSF7 PE=1 SV=1|Isoform 2 of Cleavage and polyadenylation specificity factor subunit 7 OS=Homo sapiens GN=CPSF7|Isoform 3 of Cleavage and polyadenylation specificity factor subunit 7 OS=Homo sapiens GN=CPSF7	0.0721245	0.584845	0.79978	no hit	FALSE
BRIP1	J3QSE8|Q9BX63|Q9BX63-2	Fanconi anemia group J protein OS=Homo sapiens GN=BRIP1 PE=1 SV=1|Isoform 2 of Fanconi anemia group J protein OS=Homo sapiens GN=BRIP1	0.0719101	0.479749	0.72748	no hit	FALSE
RFC3	P40938|P40938-2	Isoform 2 of Replication factor C subunit 3 OS=Homo sapiens GN=RFC3|Replication factor C subunit 3 OS=Homo sapiens GN=RFC3 PE=1 SV=2	0.0717767	0.698104	0.867059	enriched no hit	FALSE
RAI14	Q9P0K7|Q9P0K7-2|Q9P0K7-3|Q9P0K7-4	Ankycorbin OS=Homo sapiens GN=RAI14 PE=1 SV=2|Isoform 2 of Ankycorbin OS=Homo sapiens GN=RAI14|Isoform 3 of Ankycorbin OS=Homo sapiens GN=RAI14|Isoform 4 of Ankycorbin OS=Homo sapiens GN=RAI14	0.0716962	0.592685	0.802138	no hit	FALSE
FAF2	Q96CS3	FAS-associated factor 2 OS=Homo sapiens GN=FAF2 PE=1 SV=2	0.0715171	0.420291	0.682703	no hit	FALSE
DHX8	F5H658|Q14562	ATP-dependent RNA helicase DHX8 OS=Homo sapiens GN=DHX8 PE=1 SV=1	0.0712981	0.546143	0.770748	no hit	FALSE
WDR3	Q9UNX4	WD repeat-containing protein 3 OS=Homo sapiens GN=WDR3 PE=1 SV=1	0.0706321	0.454221	0.707865	no hit	FALSE
GOLGA2	A0A0C4DGS5|Q08379	Golgi autoantigen, golgin subfamily a, 2, isoform CRA_a OS=Homo sapiens GN=GOLGA2 PE=1 SV=1|Golgin subfamily A member 2 OS=Homo sapiens GN=GOLGA2 PE=1 SV=3	0.0705897	0.544203	0.770748	no hit	FALSE
CPSF3	G5E9W3|Q9UKF6	Cleavage and polyadenylation specific factor 3, 73kDa, isoform CRA_b OS=Homo sapiens GN=CPSF3 PE=1 SV=1|Cleavage and polyadenylation specificity factor subunit 3 OS=Homo sapiens GN=CPSF3 PE=1 SV=1	0.0705716	0.410361	0.671852	no hit	FALSE
H2AFZ|H2AFV	P0C0S5|Q71UI9	Histone H2A.Z OS=Homo sapiens GN=H2AFZ PE=1 SV=2|Histone H2A.V OS=Homo sapiens GN=H2AFV PE=1 SV=3	0.0705446	0.719321	0.881141	no hit	FALSE
ELAC2	G5E9D5|Q9BQ52|Q9BQ52-4	ElaC homolog 2 (E. coli), isoform CRA_a OS=Homo sapiens GN=ELAC2 PE=1 SV=1|Isoform 4 of Zinc phosphodiesterase ELAC protein 2 OS=Homo sapiens GN=ELAC2|Zinc phosphodiesterase ELAC protein 2 OS=Homo sapiens GN=ELAC2 PE=1 SV=2	0.0703682	0.446854	0.703348	no hit	FALSE
PRMT3	A0A0A0MSN7|O60678|O60678-2	Isoform 2 of Protein arginine N-methyltransferase 3 OS=Homo sapiens GN=PRMT3|Protein arginine N-methyltransferase 3 OS=Homo sapiens GN=PRMT3 PE=1 SV=1|Protein arginine N-methyltransferase 3 OS=Homo sapiens GN=PRMT3 PE=1 SV=3	0.0701273	0.51857	0.75282	no hit	FALSE
PSMC6	A0A087X2I1|P62333	26S protease regulatory subunit 10B OS=Homo sapiens GN=PSMC6 PE=1 SV=1|26S protease regulatory subunit 10B OS=Homo sapiens GN=PSMC6 PE=1 SV=1	0.0699442	0.710039	0.874835	no hit	FALSE
DHCR7	E9PM00|Q9UBM7	7-dehydrocholesterol reductase (Fragment) OS=Homo sapiens GN=DHCR7 PE=1 SV=1|7-dehydrocholesterol reductase OS=Homo sapiens GN=DHCR7 PE=1 SV=1	0.0695839	0.544757	0.770748	no hit	FALSE
KATNA1	B7ZBC8|B7ZBC9|O75449	Katanin p60 ATPase-containing subunit A1 (Fragment) OS=Homo sapiens GN=KATNA1 PE=1 SV=1|Katanin p60 ATPase-containing subunit A1 OS=Homo sapiens GN=KATNA1 PE=1 SV=1	0.0695318	0.624081	0.82408	no hit	FALSE
RPL28	H0YKD8|P46779|P46779-2|P46779-3	60S ribosomal protein L28 OS=Homo sapiens GN=RPL28 PE=1 SV=1|60S ribosomal protein L28 OS=Homo sapiens GN=RPL28 PE=1 SV=3|Isoform 2 of 60S ribosomal protein L28 OS=Homo sapiens GN=RPL28|Isoform 3 of 60S ribosomal protein L28 OS=Homo sapiens GN=RPL28	0.0695228	0.430462	0.688564	no hit	FALSE
POLR1A	O95602	DNA-directed RNA polymerase I subunit RPA1 OS=Homo sapiens GN=POLR1A PE=1 SV=2	0.0691831	0.427349	0.687383	no hit	FALSE
SMC1A	Q14683	Structural maintenance of chromosomes protein 1A OS=Homo sapiens GN=SMC1A PE=1 SV=2	0.0689571	0.547478	0.77129	no hit	FALSE
TOP2A	P11388|P11388-2|P11388-3|P11388-4	DNA topoisomerase 2-alpha OS=Homo sapiens GN=TOP2A PE=1 SV=3|Isoform 2 of DNA topoisomerase 2-alpha OS=Homo sapiens GN=TOP2A|Isoform 3 of DNA topoisomerase 2-alpha OS=Homo sapiens GN=TOP2A|Isoform 4 of DNA topoisomerase 2-alpha OS=Homo sapiens GN=TOP2A	0.0685744	0.517485	0.75282	no hit	FALSE
PLD6	Q8N2A8	Mitochondrial cardiolipin hydrolase OS=Homo sapiens GN=PLD6 PE=1 SV=1	0.0682313	0.83161	0.941417	no hit	FALSE
CDC42BPB	Q9Y5S2	Serine/threonine-protein kinase MRCK beta OS=Homo sapiens GN=CDC42BPB PE=1 SV=2	0.068002	0.429965	0.688398	no hit	FALSE
MTX1	A0A0A0MRK6|Q13505|Q13505-3	Metaxin 1, isoform CRA_b OS=Homo sapiens GN=MTX1 PE=1 SV=1|Metaxin-1 OS=Homo sapiens GN=MTX1 PE=1 SV=2|Isoform 3 of Metaxin-1 OS=Homo sapiens GN=MTX1	0.0679147	0.60222	0.809129	no hit	FALSE
ALDH3A2	J3QRD1|P51648|P51648-2	Fatty aldehyde dehydrogenase OS=Homo sapiens GN=ALDH3A2 PE=1 SV=1|Isoform 2 of Fatty aldehyde dehydrogenase OS=Homo sapiens GN=ALDH3A2	0.0678348	0.493175	0.737176	no hit	FALSE
STOM	P27105	Erythrocyte band 7 integral membrane protein OS=Homo sapiens GN=STOM PE=1 SV=3	0.0673837	0.448378	0.703941	no hit	FALSE
IBTK	E7EPI0|E9PDR5|Q9P2D0	Inhibitor of Bruton tyrosine kinase OS=Homo sapiens GN=IBTK PE=1 SV=1|Inhibitor of Bruton tyrosine kinase OS=Homo sapiens GN=IBTK PE=1 SV=3	0.0671011	0.514062	0.749893	no hit	FALSE
CPNE8	E7ENV7|Q86YQ8	Copine-8 OS=Homo sapiens GN=CPNE8 PE=1 SV=2	0.0669849	0.623771	0.82408	no hit	FALSE
VPS13A	Q96RL7|Q96RL7-2|Q96RL7-3|Q96RL7-4	Vacuolar protein sorting-associated protein 13A OS=Homo sapiens GN=VPS13A PE=1 SV=2|Isoform 2 of Vacuolar protein sorting-associated protein 13A OS=Homo sapiens GN=VPS13A|Isoform 3 of Vacuolar protein sorting-associated protein 13A OS=Homo sapiens GN=VPS13A|Isoform 4 of Vacuolar protein sorting-associated protein 13A OS=Homo sapiens GN=VPS13A	0.0669278	0.478348	0.726354	no hit	FALSE
FANCB	C9J5X9|Q8NB91	Fanconi anemia group B protein (Fragment) OS=Homo sapiens GN=FANCB PE=1 SV=1|Fanconi anemia group B protein OS=Homo sapiens GN=FANCB PE=1 SV=1	0.0668664	0.441813	0.698908	no hit	FALSE
FCHO2	H0YAE2|H7BXJ4|Q0JRZ9|Q0JRZ9-2|Q0JRZ9-3	F-BAR domain only protein 2 (Fragment) OS=Homo sapiens GN=FCHO2 PE=1 SV=8|F-BAR domain only protein 2 OS=Homo sapiens GN=FCHO2 PE=1 SV=1|F-BAR domain only protein 2 OS=Homo sapiens GN=FCHO2 PE=1 SV=2|Isoform 2 of F-BAR domain only protein 2 OS=Homo sapiens GN=FCHO2|Isoform 3 of F-BAR domain only protein 2 OS=Homo sapiens GN=FCHO2	0.0668458	0.644219	0.836289	no hit	FALSE
RLF	Q13129	Zinc finger protein Rlf OS=Homo sapiens GN=RLF PE=1 SV=2	0.0664007	0.518699	0.75282	no hit	FALSE
WDR36	A0A0A0MTB8|Q8NI36	WD repeat-containing protein 36 OS=Homo sapiens GN=WDR36 PE=1 SV=1|WD repeat-containing protein 36 OS=Homo sapiens GN=WDR36 PE=1 SV=1	0.0659622	0.603429	0.809384	no hit	FALSE
KIF21A	Q7Z4S6|Q7Z4S6-2|Q7Z4S6-3|Q7Z4S6-4|Q7Z4S6-5|Q7Z4S6-6	Kinesin-like protein KIF21A OS=Homo sapiens GN=KIF21A PE=1 SV=2|Isoform 2 of Kinesin-like protein KIF21A OS=Homo sapiens GN=KIF21A|Isoform 3 of Kinesin-like protein KIF21A OS=Homo sapiens GN=KIF21A|Isoform 4 of Kinesin-like protein KIF21A OS=Homo sapiens GN=KIF21A|Isoform 5 of Kinesin-like protein KIF21A OS=Homo sapiens GN=KIF21A|Isoform 6 of Kinesin-like protein KIF21A OS=Homo sapiens GN=KIF21A	0.0659434	0.59468	0.803801	no hit	FALSE
KIF15	C9JKA9|D6RCT7|Q9NS87|Q9NS87-2|Q9NS87-4	Isoform 2 of Kinesin-like protein KIF15 OS=Homo sapiens GN=KIF15|Isoform 4 of Kinesin-like protein KIF15 OS=Homo sapiens GN=KIF15|Kinesin-like protein (Fragment) OS=Homo sapiens GN=KIF15 PE=1 SV=1|Kinesin-like protein KIF15 OS=Homo sapiens GN=KIF15 PE=1 SV=1	0.0659116	0.609603	0.813998	no hit	FALSE
RAB39A	Q14964	Ras-related protein Rab-39A OS=Homo sapiens GN=RAB39A PE=1 SV=2	0.0656775	0.609623	0.813998	no hit	FALSE
RRM1	P23921	Ribonucleoside-diphosphate reductase large subunit OS=Homo sapiens GN=RRM1 PE=1 SV=1	0.0656241	0.526595	0.759405	enriched no hit	FALSE
GOLGA5	Q8TBA6|Q8TBA6-2	Golgin subfamily A member 5 OS=Homo sapiens GN=GOLGA5 PE=1 SV=3|Isoform 2 of Golgin subfamily A member 5 OS=Homo sapiens GN=GOLGA5	0.065056	0.65299	0.84283	no hit	FALSE
MEN1	E7EN32|O00255|O00255-2|O00255-3	Menin OS=Homo sapiens GN=MEN1 PE=1 SV=1|Menin OS=Homo sapiens GN=MEN1 PE=1 SV=4|Isoform 2 of Menin OS=Homo sapiens GN=MEN1|Isoform 3 of Menin OS=Homo sapiens GN=MEN1	0.0649587	0.500787	0.742693	no hit	FALSE
CENPN	Q96H22|Q96H22-3|Q96H22-4|Q96H22-5	Centromere protein N OS=Homo sapiens GN=CENPN PE=1 SV=2|Isoform 3 of Centromere protein N OS=Homo sapiens GN=CENPN|Isoform 4 of Centromere protein N OS=Homo sapiens GN=CENPN|Isoform 5 of Centromere protein N OS=Homo sapiens GN=CENPN	0.0648354	0.670383	0.852179	no hit	FALSE
ZC3H7A	Q8IWR0	Zinc finger CCCH domain-containing protein 7A OS=Homo sapiens GN=ZC3H7A PE=1 SV=1	0.0646995	0.447497	0.703638	no hit	FALSE
NAA15	A0A0B4J1W3|Q9BXJ9	N-alpha-acetyltransferase 15, NatA auxiliary subunit OS=Homo sapiens GN=NAA15 PE=1 SV=1|N-alpha-acetyltransferase 15, NatA auxiliary subunit OS=Homo sapiens GN=NAA15 PE=1 SV=1	0.0642922	0.524299	0.757576	no hit	FALSE
RAPGEF6|E9PCH4	A0A0A6YYB7|E9PCH4|Q8TEU7|Q8TEU7-3|Q8TEU7-4|Q8TEU7-5	Rap guanine nucleotide exchange factor 6 OS=Homo sapiens GN=RAPGEF6 PE=1 SV=1|Uncharacterized protein OS=Homo sapiens PE=4 SV=1|Rap guanine nucleotide exchange factor 6 OS=Homo sapiens GN=RAPGEF6 PE=1 SV=2|Isoform 3 of Rap guanine nucleotide exchange factor 6 OS=Homo sapiens GN=RAPGEF6|Isoform 4 of Rap guanine nucleotide exchange factor 6 OS=Homo sapiens GN=RAPGEF6|Isoform 5 of Rap guanine nucleo…	0.0641903	0.620392	0.821622	no hit	FALSE
FERMT2	H0YJ34|Q96AC1|Q96AC1-3	Fermitin family homolog 2 (Fragment) OS=Homo sapiens GN=FERMT2 PE=1 SV=1|Fermitin family homolog 2 OS=Homo sapiens GN=FERMT2 PE=1 SV=1|Isoform 3 of Fermitin family homolog 2 OS=Homo sapiens GN=FERMT2	0.0640924	0.502785	0.743432	no hit	FALSE
TRAFD1	O14545	TRAF-type zinc finger domain-containing protein 1 OS=Homo sapiens GN=TRAFD1 PE=1 SV=1	0.0640618	0.588034	0.799947	no hit	FALSE
TRAPPC13	A5PLN9|A5PLN9-2|A5PLN9-4|A5PLN9-5|A5PLN9-7	Isoform 2 of Trafficking protein particle complex subunit 13 OS=Homo sapiens GN=TRAPPC13|Isoform 3 of Trafficking protein particle complex subunit 13 OS=Homo sapiens GN=TRAPPC13|Isoform 4 of Trafficking protein particle complex subunit 13 OS=Homo sapiens GN=TRAPPC13|Isoform 5 of Trafficking protein particle complex subunit 13 OS=Homo sapiens GN=TRAPPC13|Trafficking protein particle complex subuni…	0.0637314	0.64091	0.833827	no hit	FALSE
CNOT3	O75175	CCR4-NOT transcription complex subunit 3 OS=Homo sapiens GN=CNOT3 PE=1 SV=1	0.0632759	0.548087	0.77129	no hit	FALSE
ACTR8	Q9H981	Actin-related protein 8 OS=Homo sapiens GN=ACTR8 PE=1 SV=2	0.06319	0.581988	0.797028	no hit	FALSE
RPS2	P15880	40S ribosomal protein S2 OS=Homo sapiens GN=RPS2 PE=1 SV=2	0.0629842	0.637993	0.833194	no hit	FALSE
MCM5	P33992	DNA replication licensing factor MCM5 OS=Homo sapiens GN=MCM5 PE=1 SV=5	0.0627495	0.431868	0.690111	no hit	FALSE
UTP6	Q9NYH9	U3 small nucleolar RNA-associated protein 6 homolog OS=Homo sapiens GN=UTP6 PE=2 SV=2	0.062721	0.611331	0.814419	no hit	FALSE
NUB1	H3BM14|H3BM74|Q9Y5A7|Q9Y5A7-2	NEDD8 ultimate buster 1 OS=Homo sapiens GN=NUB1 PE=1 SV=1|NEDD8 ultimate buster 1 OS=Homo sapiens GN=NUB1 PE=1 SV=1|NEDD8 ultimate buster 1 OS=Homo sapiens GN=NUB1 PE=1 SV=2|Isoform 2 of NEDD8 ultimate buster 1 OS=Homo sapiens GN=NUB1	0.0624565	0.564136	0.784568	no hit	FALSE
IFT74	Q96LB3	Intraflagellar transport protein 74 homolog OS=Homo sapiens GN=IFT74 PE=1 SV=1	0.0622879	0.593977	0.803206	no hit	FALSE
RPS11	M0QZC5|P62280	40S ribosomal protein S11 OS=Homo sapiens GN=RPS11 PE=1 SV=1|40S ribosomal protein S11 OS=Homo sapiens GN=RPS11 PE=1 SV=3	0.0621548	0.47827	0.726354	no hit	FALSE
EPRS	P07814	Bifunctional glutamate/proline--tRNA ligase OS=Homo sapiens GN=EPRS PE=1 SV=5	0.06215	0.59706	0.805277	no hit	FALSE
INTS7	Q9NVH2|Q9NVH2-2|Q9NVH2-3	Integrator complex subunit 7 OS=Homo sapiens GN=INTS7 PE=1 SV=1|Isoform 2 of Integrator complex subunit 7 OS=Homo sapiens GN=INTS7|Isoform 3 of Integrator complex subunit 7 OS=Homo sapiens GN=INTS7	0.0614997	0.574281	0.793259	no hit	FALSE
SPTLC2	H0YJV2|O15270	Serine palmitoyltransferase 2 (Fragment) OS=Homo sapiens GN=SPTLC2 PE=1 SV=1|Serine palmitoyltransferase 2 OS=Homo sapiens GN=SPTLC2 PE=1 SV=1	0.0611909	0.555632	0.777638	no hit	FALSE
ATAD1	Q8NBU5	ATPase family AAA domain-containing protein 1 OS=Homo sapiens GN=ATAD1 PE=1 SV=1	0.0609194	0.65693	0.844433	no hit	FALSE
LRRC14	Q15048	Leucine-rich repeat-containing protein 14 OS=Homo sapiens GN=LRRC14 PE=2 SV=1	0.0608672	0.755554	0.902478	no hit	FALSE
EIF2S3	P41091	Eukaryotic translation initiation factor 2 subunit 3 OS=Homo sapiens GN=EIF2S3 PE=1 SV=3	0.0607583	0.481957	0.728723	no hit	FALSE
PNISR	Q8TF01	Arginine/serine-rich protein PNISR OS=Homo sapiens GN=PNISR PE=1 SV=2	0.0607329	0.802017	0.924817	no hit	FALSE
CTBP2	P56545|P56545-2|Q5SQP8	C-terminal-binding protein 2 OS=Homo sapiens GN=CTBP2 PE=1 SV=1|Isoform 2 of C-terminal-binding protein 2 OS=Homo sapiens GN=CTBP2|C-terminal-binding protein 2 OS=Homo sapiens GN=CTBP2 PE=1 SV=1	0.0605695	0.591375	0.801549	no hit	FALSE
WDR12	Q9GZL7	Ribosome biogenesis protein WDR12 OS=Homo sapiens GN=WDR12 PE=1 SV=2	0.0603284	0.637778	0.833194	no hit	FALSE
CAPZB	B1AK87|B1AK88|P47756-2	Capping protein (Actin filament) muscle Z-line, beta, isoform CRA_a OS=Homo sapiens GN=CAPZB PE=1 SV=1|Capping protein (Actin filament) muscle Z-line, beta, isoform CRA_d OS=Homo sapiens GN=CAPZB PE=1 SV=1|Isoform 2 of F-actin-capping protein subunit beta OS=Homo sapiens GN=CAPZB	0.0603176	0.541882	0.769785	no hit	FALSE
EFR3A	Q14156|Q14156-2|Q14156-3	Isoform 2 of Protein EFR3 homolog A OS=Homo sapiens GN=EFR3A|Isoform 3 of Protein EFR3 homolog A OS=Homo sapiens GN=EFR3A|Protein EFR3 homolog A OS=Homo sapiens GN=EFR3A PE=1 SV=2	0.0603086	0.509829	0.747448	no hit	FALSE
INPP5F	Q9Y2H2	Phosphatidylinositide phosphatase SAC2 OS=Homo sapiens GN=INPP5F PE=1 SV=3	0.059845	0.514744	0.750539	no hit	FALSE
FDFT1	E9PNM1|P37268|P37268-2|P37268-5	Isoform 2 of Squalene synthase OS=Homo sapiens GN=FDFT1|Isoform 5 of Squalene synthase OS=Homo sapiens GN=FDFT1|Squalene synthase OS=Homo sapiens GN=FDFT1 PE=1 SV=1	0.0596311	0.666555	0.849864	no hit	FALSE
YWHAE	P62258	14-3-3 protein epsilon OS=Homo sapiens GN=YWHAE PE=1 SV=1	0.0596229	0.739487	0.894316	no hit	FALSE
FANCD2	Q9BXW9|Q9BXW9-1	Fanconi anemia group D2 protein OS=Homo sapiens GN=FANCD2 PE=1 SV=2|Isoform 1 of Fanconi anemia group D2 protein OS=Homo sapiens GN=FANCD2	0.0593628	0.786691	0.918301	no hit	FALSE
TARBP1	Q13395	Probable methyltransferase TARBP1 OS=Homo sapiens GN=TARBP1 PE=1 SV=1	0.0589293	0.553145	0.776326	no hit	FALSE
SPTLC1	O15269	Serine palmitoyltransferase 1 OS=Homo sapiens GN=SPTLC1 PE=1 SV=1	0.0589105	0.528553	0.760459	no hit	FALSE
USP54	Q70EL1|Q70EL1-7	Inactive ubiquitin carboxyl-terminal hydrolase 54 OS=Homo sapiens GN=USP54 PE=1 SV=4|Isoform 4 of Inactive ubiquitin carboxyl-terminal hydrolase 54 OS=Homo sapiens GN=USP54	0.0585377	0.654602	0.843162	no hit	FALSE
ACTR1A	P61163	Alpha-centractin OS=Homo sapiens GN=ACTR1A PE=1 SV=1	0.0584979	0.558033	0.77971	no hit	FALSE
PRPF8	Q6P2Q9	Pre-mRNA-processing-splicing factor 8 OS=Homo sapiens GN=PRPF8 PE=1 SV=2	0.0584193	0.490258	0.733868	no hit	FALSE
CYFIP1	Q7L576	Cytoplasmic FMR1-interacting protein 1 OS=Homo sapiens GN=CYFIP1 PE=1 SV=1	0.0582619	0.605962	0.811189	no hit	FALSE
CDK12	J3QSD7|Q9NYV4|Q9NYV4-2|Q9NYV4-3	Cyclin-dependent kinase 12 (Fragment) OS=Homo sapiens GN=CDK12 PE=1 SV=1|Cyclin-dependent kinase 12 OS=Homo sapiens GN=CDK12 PE=1 SV=2|Isoform 2 of Cyclin-dependent kinase 12 OS=Homo sapiens GN=CDK12|Isoform 3 of Cyclin-dependent kinase 12 OS=Homo sapiens GN=CDK12	0.0581634	0.587973	0.799947	no hit	FALSE
BBS4	H3BSL2|Q96RK4|Q96RK4-2	Bardet-Biedl syndrome 4 protein (Fragment) OS=Homo sapiens GN=BBS4 PE=1 SV=1|Bardet-Biedl syndrome 4 protein OS=Homo sapiens GN=BBS4 PE=1 SV=2|Isoform 2 of Bardet-Biedl syndrome 4 protein OS=Homo sapiens GN=BBS4	0.0581539	0.659196	0.845964	enriched no hit	FALSE
C15orf39	Q6ZRI6|Q6ZRI6-2	Isoform 2 of Uncharacterized protein C15orf39 OS=Homo sapiens GN=C15orf39|Uncharacterized protein C15orf39 OS=Homo sapiens GN=C15orf39 PE=1 SV=3	0.0581166	0.781627	0.916839	no hit	FALSE
CYB5R1	H7C0R7|Q9UHQ9	NADH-cytochrome b5 reductase 1 (Fragment) OS=Homo sapiens GN=CYB5R1 PE=1 SV=1|NADH-cytochrome b5 reductase 1 OS=Homo sapiens GN=CYB5R1 PE=1 SV=1	0.0580837	0.605353	0.811189	no hit	FALSE
YWHAB	P31946|P31946-2	14-3-3protein beta/alpha OS=Homo sapiens GN=YWHAB PE=1 SV=3|Isoform Short of 14-3-3 protein beta/alpha OS=Homo sapiens GN=YWHAB	0.058009	0.692394	0.864752	no hit	FALSE
EEA1	Q15075	Early endosome antigen 1 OS=Homo sapiens GN=EEA1 PE=1 SV=2	0.0576257	0.702985	0.869032	no hit	FALSE
FAM208B	Q5VWN6	Protein FAM208B OS=Homo sapiens GN=FAM208B PE=1 SV=1	0.057464	0.588615	0.799947	no hit	FALSE
ARPC2	O15144	Actin-related protein 2/3 complex subunit 2 OS=Homo sapiens GN=ARPC2 PE=1 SV=1	0.0574587	0.489169	0.733372	no hit	FALSE
YY1	P25490	Transcriptional repressor protein YY1 OS=Homo sapiens GN=YY1 PE=1 SV=2	0.0571509	0.536283	0.765979	no hit	FALSE
KIF2A	O00139|O00139-1|O00139-2|O00139-4|O00139-5	Isoform 1 of Kinesin-like protein KIF2A OS=Homo sapiens GN=KIF2A|Isoform 2 of Kinesin-like protein KIF2A OS=Homo sapiens GN=KIF2A|Isoform 4 of Kinesin-like protein KIF2A OS=Homo sapiens GN=KIF2A|Isoform 5 of Kinesin-like protein KIF2A OS=Homo sapiens GN=KIF2A|Kinesin-like protein KIF2A OS=Homo sapiens GN=KIF2A PE=1 SV=3	0.0571506	0.577965	0.794943	no hit	FALSE
ASPM	Q8IZT6	Abnormal spindle-like microcephaly-associated protein OS=Homo sapiens GN=ASPM PE=1 SV=2	0.0571269	0.682032	0.859938	no hit	FALSE
UGGT2	Q9NYU1	UDP-glucose:glycoprotein glucosyltransferase 2 OS=Homo sapiens GN=UGGT2 PE=1 SV=4	0.056905	0.697465	0.867059	no hit	FALSE
BCAS3	Q9H6U6|Q9H6U6-2|Q9H6U6-3|Q9H6U6-7|Q9H6U6-8	Breast carcinoma-amplified sequence 3 OS=Homo sapiens GN=BCAS3 PE=1 SV=3|Isoform 1 of Breast carcinoma-amplified sequence 3 OS=Homo sapiens GN=BCAS3|Isoform 3 of Breast carcinoma-amplified sequence 3 OS=Homo sapiens GN=BCAS3|Isoform 4 of Breast carcinoma-amplified sequence 3 OS=Homo sapiens GN=BCAS3|Isoform 5 of Breast carcinoma-amplified sequence 3 OS=Homo sapiens GN=BCAS3	0.0568788	0.650324	0.841093	no hit	FALSE
NBAS	A2RRP1	Neuroblastoma-amplified sequence OS=Homo sapiens GN=NBAS PE=1 SV=2	0.056619	0.486457	0.731641	no hit	FALSE
NPEPPS	E9PLK3|P55786	Puromycin-sensitive aminopeptidase OS=Homo sapiens GN=NPEPPS PE=1 SV=1|Puromycin-sensitive aminopeptidase OS=Homo sapiens GN=NPEPPS PE=1 SV=2	0.0565462	0.579345	0.796237	no hit	FALSE
EMC7	H0YDT8|Q9NPA0	ER membrane protein complex subunit 7 (Fragment) OS=Homo sapiens GN=EMC7 PE=1 SV=1|ER membrane protein complex subunit 7 OS=Homo sapiens GN=EMC7 PE=1 SV=1	0.0563637	0.736672	0.893374	no hit	FALSE
PIK3C3	A8MYT4|Q8NEB9	Phosphatidylinositol 3-kinase OS=Homo sapiens GN=PIK3C3 PE=1 SV=2|Phosphatidylinositol 3-kinase catalytic subunit type 3 OS=Homo sapiens GN=PIK3C3 PE=1 SV=1	0.0561998	0.666501	0.849864	no hit	FALSE
SMARCA4	A0A0A0MT49|P51532|P51532-2|P51532-3|P51532-4|P51532-5|Q9HBD4	Isoform 2 of Transcription activator BRG1 OS=Homo sapiens GN=SMARCA4|Isoform 3 of Transcription activator BRG1 OS=Homo sapiens GN=SMARCA4|Isoform 4 of Transcription activator BRG1 OS=Homo sapiens GN=SMARCA4|Isoform 5 of Transcription activator BRG1 OS=Homo sapiens GN=SMARCA4|SMARCA4 isoform 2 OS=Homo sapiens GN=SMARCA4 PE=1 SV=1|Transcription activator BRG1 OS=Homo sapiens GN=SMARCA4 PE=1 SV=1|Tr…	0.0561965	0.559355	0.780175	no hit	FALSE
NAA10	P41227|P41227-2	N-alpha-acetyltransferase 10 OS=Homo sapiens GN=NAA10 PE=1 SV=1|Isoform 2 of N-alpha-acetyltransferase 10 OS=Homo sapiens GN=NAA10	0.056141	0.609722	0.813998	no hit	FALSE
RPL5	P46777	60S ribosomal protein L5 OS=Homo sapiens GN=RPL5 PE=1 SV=3	0.0559847	0.582073	0.797028	no hit	FALSE
ACSL4	O60488|O60488-2	Long-chain-fatty-acid--CoA ligase 4 OS=Homo sapiens GN=ACSL4 PE=1 SV=2|Isoform Short of Long-chain-fatty-acid--CoA ligase 4 OS=Homo sapiens GN=ACSL4	0.0557549	0.625135	0.825126	no hit	FALSE
RAB29	O14966|O14966-2	Isoform 2 of Ras-related protein Rab-7L1 OS=Homo sapiens GN=RAB29|Ras-related protein Rab-7L1 OS=Homo sapiens GN=RAB29 PE=1 SV=1	0.0556934	0.545625	0.770748	no hit	FALSE
SMARCAL1	H7BYI2|Q9NZC9	SWI/SNF-related matrix-associated actin-dependent regulator of chromatin subfamily A-like protein 1 (Fragment) OS=Homo sapiens GN=SMARCAL1 PE=1 SV=1|SWI/SNF-related matrix-associated actin-dependent regulator of chromatin subfamily A-like protein 1 OS=Homo sapiens GN=SMARCAL1 PE=1 SV=1	0.0556316	0.683036	0.859938	no hit	FALSE
STXBP4	Q6ZWJ1	Syntaxin-binding protein 4 OS=Homo sapiens GN=STXBP4 PE=1 SV=2	0.0548295	0.69928	0.868033	no hit	FALSE
EML4	Q9HC35|Q9HC35-2	Echinoderm microtubule-associated protein-like 4 OS=Homo sapiens GN=EML4 PE=1 SV=3|Isoform 2 of Echinoderm microtubule-associated protein-like 4 OS=Homo sapiens GN=EML4	0.054793	0.619071	0.820217	no hit	FALSE
MPP5	Q8N3R9|Q8N3R9-2	MAGUK p55 subfamily member 5 OS=Homo sapiens GN=MPP5 PE=1 SV=3|Isoform 2 of MAGUK p55 subfamily member 5 OS=Homo sapiens GN=MPP5	0.0547442	0.695236	0.866262	no hit	FALSE
CBFB	Q13951|Q13951-2	Core-binding factor subunit beta OS=Homo sapiens GN=CBFB PE=1 SV=2|Isoform 2 of Core-binding factor subunit beta OS=Homo sapiens GN=CBFB	0.0544009	0.772535	0.913774	no hit	FALSE
SMC5	Q8IY18	Structural maintenance of chromosomes protein 5 OS=Homo sapiens GN=SMC5 PE=1 SV=2	0.0542642	0.557805	0.77971	no hit	FALSE
DRG1	Q9Y295	Developmentally-regulated GTP-binding protein 1 OS=Homo sapiens GN=DRG1 PE=1 SV=1	0.0541405	0.635557	0.831896	no hit	FALSE
MORC2	Q9Y6X9|Q9Y6X9-2	MORC family CW-type zinc finger protein 2 OS=Homo sapiens GN=MORC2 PE=1 SV=2|Isoform 2 of MORC family CW-type zinc finger protein 2 OS=Homo sapiens GN=MORC2	0.0540163	0.724639	0.884172	no hit	FALSE
NCAPH	E9PHA2|Q15003	Condensin complex subunit 2 OS=Homo sapiens GN=NCAPH PE=1 SV=1|Condensin complex subunit 2 OS=Homo sapiens GN=NCAPH PE=1 SV=3	0.0540043	0.591312	0.801549	no hit	FALSE
TGS1	Q96RS0	Trimethylguanosine synthase OS=Homo sapiens GN=TGS1 PE=1 SV=3	0.0539376	0.567828	0.786415	no hit	FALSE
DNAJB2	P25686	DnaJ homolog subfamily B member 2 OS=Homo sapiens GN=DNAJB2 PE=1 SV=3	0.053823	0.717287	0.879882	no hit	FALSE
TIA1	C9JTN7|F8W8I6|P31483|P31483-2	Isoform Short of Nucleolysin TIA-1 isoform p40 OS=Homo sapiens GN=TIA1|Nucleolysin TIA-1 isoform p40 OS=Homo sapiens GN=TIA1 PE=1 SV=1|Nucleolysin TIA-1 isoform p40 OS=Homo sapiens GN=TIA1 PE=1 SV=3	0.0533099	0.813489	0.9319	no hit	FALSE
INTS4	Q96HW7	Integrator complex subunit 4 OS=Homo sapiens GN=INTS4 PE=1 SV=2	0.0532536	0.645417	0.837153	no hit	FALSE
FARSA	Q9Y285	Phenylalanine--tRNA ligase alpha subunit OS=Homo sapiens GN=FARSA PE=1 SV=3	0.0529902	0.772787	0.913774	enriched no hit	FALSE
SCAF11	F8VXG7|Q99590|Q99590-2	Isoform 2 of Protein SCAF11 OS=Homo sapiens GN=SCAF11|Protein SCAF11 OS=Homo sapiens GN=SCAF11 PE=1 SV=1|Protein SCAF11 OS=Homo sapiens GN=SCAF11 PE=1 SV=2	0.0528254	0.67229	0.853007	no hit	FALSE
SNX6	A0A0A0MRI2|Q9UNH7	Sorting nexin 6, isoform CRA_b OS=Homo sapiens GN=SNX6 PE=1 SV=1|Sorting nexin-6 OS=Homo sapiens GN=SNX6 PE=1 SV=1	0.0524644	0.692489	0.864752	no hit	FALSE
NUP205	Q92621	Nuclear pore complex protein Nup205 OS=Homo sapiens GN=NUP205 PE=1 SV=3	0.0524603	0.507312	0.746395	no hit	FALSE
HIP1	O00291|O00291-3|O00291-4	Huntingtin-interacting protein 1 OS=Homo sapiens GN=HIP1 PE=1 SV=5|Isoform 3 of Huntingtin-interacting protein 1 OS=Homo sapiens GN=HIP1|Isoform 4 of Huntingtin-interacting protein 1 OS=Homo sapiens GN=HIP1	0.0523479	0.754054	0.901542	no hit	FALSE
ARHGAP21	Q5T5U3	Rho GTPase-activating protein 21 OS=Homo sapiens GN=ARHGAP21 PE=1 SV=1	0.0521452	0.782175	0.916839	no hit	FALSE
U2AF1L5|U2AF1	P0DN76|Q01081	Splicing factor U2AF 35 kDa subunit-like protein OS=Homo sapiens GN=U2AF1L5 PE=1 SV=1|Splicing factor U2AF 35 kDa subunit OS=Homo sapiens GN=U2AF1 PE=1 SV=3	0.0518521	0.580505	0.797028	no hit	FALSE
QARS	P47897|P47897-2	Glutamine--tRNA ligase OS=Homo sapiens GN=QARS PE=1 SV=1|Isoform 2 of Glutamine--tRNA ligase OS=Homo sapiens GN=QARS	0.0513888	0.585923	0.799947	no hit	FALSE
DHFR	P00374	Dihydrofolate reductase OS=Homo sapiens GN=DHFR PE=1 SV=2	0.0513348	0.738835	0.894316	enriched no hit	FALSE
DDX31	F8WAJ0|Q9H8H2|Q9H8H2-2|Q9H8H2-4	Isoform 2 of Probable ATP-dependent RNA helicase DDX31 OS=Homo sapiens GN=DDX31|Isoform 4 of Probable ATP-dependent RNA helicase DDX31 OS=Homo sapiens GN=DDX31|Probable ATP-dependent RNA helicase DDX31 OS=Homo sapiens GN=DDX31 PE=1 SV=2	0.0512992	0.531244	0.7612	no hit	FALSE
VARS	A0A140T936|P26640	Valine--tRNA ligase (Fragment) OS=Homo sapiens GN=VARS PE=1 SV=1|Valine--tRNA ligase OS=Homo sapiens GN=VARS PE=1 SV=4	0.050911	0.551034	0.773709	no hit	FALSE
SEPTIN2	B5MCX3|C9J2Q4|Q15019|Q15019-2|Q15019-3	Isoform 2 of Septin-2 OS=Homo sapiens GN=SEPT2|Isoform 3 of Septin-2 OS=Homo sapiens GN=SEPT2|Septin-2 (Fragment) OS=Homo sapiens GN=SEPT2 PE=1 SV=1|Septin-2 OS=Homo sapiens GN=SEPT2 PE=1 SV=1	0.0498722	0.639712	0.833194	no hit	FALSE
AAMP	C9JEH3|C9JG97|Q13685	Angio-associated migratory cell protein OS=Homo sapiens GN=AAMP PE=1 SV=1|Angio-associated migratory cell protein OS=Homo sapiens GN=AAMP PE=1 SV=1|Angio-associated migratory cell protein OS=Homo sapiens GN=AAMP PE=1 SV=2	0.0498697	0.591199	0.801549	no hit	FALSE
SMU1	Q2TAY7	WD40 repeat-containing protein SMU1 OS=Homo sapiens GN=SMU1 PE=1 SV=2	0.049474	0.646976	0.837867	no hit	FALSE
CLTC	A0A087WVQ6|Q00610|Q00610-2	Clathrin heavy chain OS=Homo sapiens GN=CLTC PE=1 SV=1|Clathrin heavy chain 1 OS=Homo sapiens GN=CLTC PE=1 SV=5|Isoform 2 of Clathrin heavy chain 1 OS=Homo sapiens GN=CLTC	0.0491961	0.585151	0.79985	no hit	FALSE
AKAP11	Q9UKA4	A-kinase anchor protein 11 OS=Homo sapiens GN=AKAP11 PE=1 SV=1	0.0490294	0.673777	0.854226	no hit	FALSE
CDC42BPA	A0A0A0MRJ0|Q5VT25|Q5VT25-2|Q5VT25-3|Q5VT25-4|Q5VT25-5|Q5VT25-6	Isoform 2 of Serine/threonine-protein kinase MRCK alpha OS=Homo sapiens GN=CDC42BPA|Isoform 3 of Serine/threonine-protein kinase MRCK alpha OS=Homo sapiens GN=CDC42BPA|Isoform 4 of Serine/threonine-protein kinase MRCK alpha OS=Homo sapiens GN=CDC42BPA|Isoform 5 of Serine/threonine-protein kinase MRCK alpha OS=Homo sapiens GN=CDC42BPA|Isoform 6 of Serine/threonine-protein kinase MRCK alpha OS=Homo…	0.0489647	0.573896	0.793074	no hit	FALSE
CARM1	Q86X55|Q86X55-1	Histone-arginine methyltransferase CARM1 OS=Homo sapiens GN=CARM1 PE=1 SV=3|Isoform 1 of Histone-arginine methyltransferase CARM1 OS=Homo sapiens GN=CARM1	0.0485355	0.635309	0.831896	no hit	FALSE
ATP13A1	Q9HD20|Q9HD20-2	Isoform B of Manganese-transporting ATPase 13A1 OS=Homo sapiens GN=ATP13A1|Manganese-transporting ATPase 13A1 OS=Homo sapiens GN=ATP13A1 PE=1 SV=2	0.0485188	0.606295	0.811189	no hit	FALSE
SARS	P49591|Q5T5C7	Serine--tRNA ligase, cytoplasmic OS=Homo sapiens GN=SARS PE=1 SV=3|Serine--tRNA ligase, cytoplasmic OS=Homo sapiens GN=SARS PE=1 SV=1	0.0484639	0.712673	0.876059	no hit	FALSE
SMAD5	Q99717	Mothers against decapentaplegic homolog 5 OS=Homo sapiens GN=SMAD5 PE=1 SV=1	0.0483811	0.606943	0.811664	no hit	FALSE
NUP85	J3KT10|Q9BW27|Q9BW27-3	Isoform 3 of Nuclear pore complex protein Nup85 OS=Homo sapiens GN=NUP85|Nuclear pore complex protein Nup85 OS=Homo sapiens GN=NUP85 PE=1 SV=1	0.0482978	0.628423	0.827384	no hit	FALSE
WIPI2	Q9Y4P8|Q9Y4P8-2|Q9Y4P8-3|Q9Y4P8-4|Q9Y4P8-5|Q9Y4P8-6	WD repeat domain phosphoinositide-interacting protein 2 OS=Homo sapiens GN=WIPI2 PE=1 SV=1|Isoform 2 of WD repeat domain phosphoinositide-interacting protein 2 OS=Homo sapiens GN=WIPI2|Isoform 3 of WD repeat domain phosphoinositide-interacting protein 2 OS=Homo sapiens GN=WIPI2|Isoform 4 of WD repeat domain phosphoinositide-interacting protein 2 OS=Homo sapiens GN=WIPI2|Isoform 5 of WD repeat dom…	0.048165	0.64646	0.837816	no hit	FALSE
ZMYM4	Q5VZL5|Q5VZL5-2|Q5VZL5-4	Isoform 2 of Zinc finger MYM-type protein 4 OS=Homo sapiens GN=ZMYM4|Isoform 4 of Zinc finger MYM-type protein 4 OS=Homo sapiens GN=ZMYM4|Zinc finger MYM-type protein 4 OS=Homo sapiens GN=ZMYM4 PE=1 SV=1	0.0480963	0.567084	0.78573	no hit	FALSE
EIF4A2	C9JUF0|Q14240|Q14240-2	Eukaryotic initiation factor 4A-II (Fragment) OS=Homo sapiens GN=EIF4A2 PE=1 SV=1|Eukaryotic initiation factor 4A-II OS=Homo sapiens GN=EIF4A2 PE=1 SV=2|Isoform 2 of Eukaryotic initiation factor 4A-II OS=Homo sapiens GN=EIF4A2	0.0477436	0.555399	0.777638	no hit	FALSE
COPS6	E7EM64|Q7L5N1	COP9 signalosome complex subunit 6 OS=Homo sapiens GN=COPS6 PE=1 SV=1|COP9 signalosome complex subunit 6 OS=Homo sapiens GN=COPS6 PE=1 SV=1	0.0475223	0.751882	0.90052	enriched no hit	FALSE
CERS2	H0YKH6|H0YNU7|Q5SZE1|Q5SZE2|Q5SZE3|Q5SZE4|Q96G23	Ceramide synthase 2 (Fragment) OS=Homo sapiens GN=CERS2 PE=1 SV=1|Ceramide synthase 2 (Fragment) OS=Homo sapiens GN=CERS2 PE=1 SV=2|Ceramide synthase 2 (Fragment) OS=Homo sapiens GN=CERS2 PE=1 SV=7|Ceramide synthase 2 OS=Homo sapiens GN=CERS2 PE=1 SV=1|Ceramide synthase 2 OS=Homo sapiens GN=CERS2 PE=1 SV=2	0.0474706	0.761777	0.904934	no hit	FALSE
PFN2	C9J0J7|C9J712|C9JQ45|G5E9Q6|P35080|P35080-2	Isoform IIb of Profilin-2 OS=Homo sapiens GN=PFN2|Profilin-2 OS=Homo sapiens GN=PFN2 PE=1 SV=3|Profilin OS=Homo sapiens GN=PFN2 PE=1 SV=1	0.0474586	0.700502	0.868866	no hit	FALSE
GTF2H2C|GTF2H2	D6RGC9|D6RID8|D6RIT7|D6RJD3|Q13888|Q6P1K8|R4GMS9	General transcription factor IIH subunit 2-like protein (Fragment) OS=Homo sapiens GN=GTF2H2C PE=1 SV=1|General transcription factor IIH subunit 2-like protein OS=Homo sapiens GN=GTF2H2C PE=1 SV=1|General transcription factor IIH subunit 2 (Fragment) OS=Homo sapiens GN=GTF2H2 PE=1 SV=1|General transcription factor IIH subunit 2 OS=Homo sapiens GN=GTF2H2 PE=1 SV=1|General transcription factor IIH …	0.0469477	0.761385	0.90481	no hit	FALSE
ZNF507	B9EGE7|Q8TCN5|Q8TCN5-2	Isoform 2 of Zinc finger protein 507 OS=Homo sapiens GN=ZNF507|Zinc finger protein 507 OS=Homo sapiens GN=ZNF507 PE=1 SV=2|ZNF507 protein OS=Homo sapiens GN=ZNF507 PE=1 SV=1	0.0469336	0.661692	0.847768	no hit	FALSE
TUBGCP2	Q9BSJ2|Q9BSJ2-4	Gamma-tubulin complex component 2 OS=Homo sapiens GN=TUBGCP2 PE=1 SV=2|Isoform 3 of Gamma-tubulin complex component 2 OS=Homo sapiens GN=TUBGCP2	0.0465857	0.652687	0.84283	no hit	FALSE
USP28	B4E3L3|Q96RU2|Q96RU2-2|Q96RU2-3	Isoform 2 of Ubiquitin carboxyl-terminal hydrolase 28 OS=Homo sapiens GN=USP28|Isoform 3 of Ubiquitin carboxyl-terminal hydrolase 28 OS=Homo sapiens GN=USP28|Ubiquitin carboxyl-terminal hydrolase 28 OS=Homo sapiens GN=USP28 PE=1 SV=1	0.0463431	0.748728	0.899617	no hit	FALSE
ANGEL2	Q5VTE6|Q5VTE6-2	Protein angel homolog 2 OS=Homo sapiens GN=ANGEL2 PE=2 SV=1|Isoform 2 of Protein angel homolog 2 OS=Homo sapiens GN=ANGEL2	0.0463031	0.773334	0.913774	no hit	FALSE
GAK	O14976	Cyclin-G-associated kinase OS=Homo sapiens GN=GAK PE=1 SV=2	0.0454469	0.68694	0.863268	no hit	FALSE
SKIV2L	Q15477	Helicase SKI2W OS=Homo sapiens GN=SKIV2L PE=1 SV=3	0.0453019	0.690004	0.864278	no hit	FALSE
PAPOLA	G3XAH6|P51003	Poly(A) polymerase alpha OS=Homo sapiens GN=PAPOLA PE=1 SV=1|Poly(A) polymerase alpha OS=Homo sapiens GN=PAPOLA PE=1 SV=4	0.0448392	0.693065	0.864752	no hit	FALSE
E7EVH7|KLC1	E7EVH7|F8W6L3|G3V2E7|G3V3H3|G3V5R9|G5E9S8|Q07866|Q07866-10|Q07866-2|Q07866-3|Q07866-4|Q07866-5|Q07866-6|Q07866-7|Q07866-8|Q07866-9	Uncharacterized protein OS=Homo sapiens PE=4 SV=1|Kinesin light chain 1 OS=Homo sapiens GN=KLC1 PE=1 SV=1|Kinesin light chain 1 OS=Homo sapiens GN=KLC1 PE=1 SV=1|Kinesin light chain 1 OS=Homo sapiens GN=KLC1 PE=1 SV=1|Kinesin light chain 1 OS=Homo sapiens GN=KLC1 PE=1 SV=1|Kinesin light chain 1 OS=Homo sapiens GN=KLC1 PE=1 SV=1|Kinesin light chain 1 OS=Homo sapiens GN=KLC1 PE=1 SV=2|Isoform D of …	0.0447442	0.840759	0.944859	no hit	FALSE
IGF2BP2	F8W930|Q9Y6M1|Q9Y6M1-1|Q9Y6M1-3|Q9Y6M1-4|Q9Y6M1-5|Q9Y6M1-6	Insulin-like growth factor 2 mRNA-binding protein 2 OS=Homo sapiens GN=IGF2BP2 PE=1 SV=1|Insulin-like growth factor 2 mRNA-binding protein 2 OS=Homo sapiens GN=IGF2BP2 PE=1 SV=2|Isoform 2 of Insulin-like growth factor 2 mRNA-binding protein 2 OS=Homo sapiens GN=IGF2BP2|Isoform 3 of Insulin-like growth factor 2 mRNA-binding protein 2 OS=Homo sapiens GN=IGF2BP2|Isoform 4 of Insulin-like growth fact…	0.0447199	0.666942	0.850014	no hit	FALSE
P3H4	Q92791	Synaptonemal complex protein SC65 OS=Homo sapiens GN=P3H4 PE=1 SV=1	0.0445114	0.689156	0.864278	no hit	FALSE
MTA2	O94776	Metastasis-associated protein MTA2 OS=Homo sapiens GN=MTA2 PE=1 SV=1	0.0444582	0.697613	0.867059	no hit	FALSE
CPSF2	Q9P2I0	Cleavage and polyadenylation specificity factor subunit 2 OS=Homo sapiens GN=CPSF2 PE=1 SV=2	0.044157	0.62634	0.825332	no hit	FALSE
SEH1L	Q96EE3|Q96EE3-1	Nucleoporin SEH1 OS=Homo sapiens GN=SEH1L PE=1 SV=3|Isoform B of Nucleoporin SEH1 OS=Homo sapiens GN=SEH1L	0.0439309	0.660613	0.847054	no hit	FALSE
NCAPD2	Q15021	Condensin complex subunit 1 OS=Homo sapiens GN=NCAPD2 PE=1 SV=3	0.0436017	0.634945	0.831896	no hit	FALSE
ACSL1	B7Z3Z9|E7EPM6|P33121|P33121-2|P33121-3	Isoform 2 of Long-chain-fatty-acid--CoA ligase 1 OS=Homo sapiens GN=ACSL1|Isoform 3 of Long-chain-fatty-acid--CoA ligase 1 OS=Homo sapiens GN=ACSL1|Long-chain-fatty-acid--CoA ligase 1 OS=Homo sapiens GN=ACSL1 PE=1 SV=1	0.0434921	0.794542	0.920995	no hit	FALSE
MRE11A	P49959|P49959-3	Double-strand break repair protein MRE11A OS=Homo sapiens GN=MRE11A PE=1 SV=3|Isoform 3 of Double-strand break repair protein MRE11A OS=Homo sapiens GN=MRE11A	0.0432967	0.879105	0.951123	no hit	FALSE
LARP4	Q71RC2|Q71RC2-3|Q71RC2-4|Q71RC2-5|Q71RC2-6	Isoform 3 of La-related protein 4 OS=Homo sapiens GN=LARP4|Isoform 4 of La-related protein 4 OS=Homo sapiens GN=LARP4|Isoform 5 of La-related protein 4 OS=Homo sapiens GN=LARP4|Isoform 6 of La-related protein 4 OS=Homo sapiens GN=LARP4|La-related protein 4 OS=Homo sapiens GN=LARP4 PE=1 SV=3	0.0432887	0.675762	0.855024	no hit	FALSE
FBXO10	J3KN78|Q9UK96	F-box only protein 10 OS=Homo sapiens GN=FBXO10 PE=1 SV=1|F-box only protein 10 OS=Homo sapiens GN=FBXO10 PE=1 SV=3	0.0432776	0.739297	0.894316	no hit	FALSE
PRIM1	P49642	DNA primase small subunit OS=Homo sapiens GN=PRIM1 PE=1 SV=1	0.0431486	0.756302	0.902691	no hit	FALSE
CAPN2	P17655	Calpain-2 catalytic subunit OS=Homo sapiens GN=CAPN2 PE=1 SV=6	0.0431056	0.709905	0.874835	no hit	FALSE
CEP128	Q6ZU80|Q6ZU80-1	Centrosomal protein of 128 kDa OS=Homo sapiens GN=CEP128 PE=1 SV=2|Isoform 1 of Centrosomal protein of 128 kDa OS=Homo sapiens GN=CEP128	0.0428589	0.719636	0.881141	no hit	FALSE
MTA3	E7EQY4|E7EV10|Q9BTC8|Q9BTC8-2	Metastasis-associated protein MTA3 OS=Homo sapiens GN=MTA3 PE=1 SV=1|Metastasis-associated protein MTA3 OS=Homo sapiens GN=MTA3 PE=1 SV=1|Metastasis-associated protein MTA3 OS=Homo sapiens GN=MTA3 PE=1 SV=2|Isoform 2 of Metastasis-associated protein MTA3 OS=Homo sapiens GN=MTA3	0.0426076	0.682646	0.859938	no hit	FALSE
GFPT1	Q06210|Q06210-2	Glutamine--fructose-6-phosphate aminotransferase [isomerizing] 1 OS=Homo sapiens GN=GFPT1 PE=1 SV=3|Isoform 2 of Glutamine--fructose-6-phosphate aminotransferase [isomerizing] 1 OS=Homo sapiens GN=GFPT1	0.0424059	0.729356	0.88855	no hit	FALSE
FBXL5	Q9UKA1	F-box/LRR-repeat protein 5 OS=Homo sapiens GN=FBXL5 PE=1 SV=2	0.0417668	0.838555	0.944116	no hit	FALSE
GCN1	Q92616	eIF-2-alpha kinase activator GCN1 OS=Homo sapiens GN=GCN1 PE=1 SV=6	0.0411171	0.707408	0.87296	no hit	FALSE
SLC27A4	Q6P1M0	Long-chain fatty acid transport protein 4 OS=Homo sapiens GN=SLC27A4 PE=1 SV=1	0.041068	0.653626	0.84283	no hit	FALSE
GPR75-ASB3|ASB3	A0A0A6YY97|A0A0A6YYF3|H7BYZ6|Q9Y575|Q9Y575-2|Q9Y575-3	Ankyrin repeat and SOCS box protein 3 (Fragment) OS=Homo sapiens GN=ASB3 PE=1 SV=1|Ankyrin repeat and SOCS box protein 3 OS=Homo sapiens GN=ASB3 PE=1 SV=1|Isoform 2 of Ankyrin repeat and SOCS box protein 3 OS=Homo sapiens GN=ASB3|Isoform 3 of Ankyrin repeat and SOCS box protein 3 OS=Homo sapiens GN=ASB3|Protein GPR75-ASB3 OS=Homo sapiens GN=GPR75-ASB3 PE=1 SV=1	0.0409992	0.696458	0.867059	no hit	FALSE
KIAA1033	A0A087X256|Q2M389|Q2M389-2	Isoform 2 of WASH complex subunit 7 OS=Homo sapiens GN=KIAA1033|WASH complex subunit 7 OS=Homo sapiens GN=KIAA1033 PE=1 SV=1|WASH complex subunit 7 OS=Homo sapiens GN=KIAA1033 PE=1 SV=2	0.0409813	0.641499	0.833827	no hit	FALSE
H3BMM5|VPS33A	H3BMM5|Q96AX1	Uncharacterized protein OS=Homo sapiens PE=3 SV=1|Vacuolar protein sorting-associated protein 33A OS=Homo sapiens GN=VPS33A PE=1 SV=1	0.040963	0.735833	0.893374	enriched no hit	FALSE
SEC24C	P53992	Protein transport protein Sec24C OS=Homo sapiens GN=SEC24C PE=1 SV=3	0.0409451	0.642137	0.833931	no hit	FALSE
EIF3G	K7EL20|K7ER90|O75821	Eukaryotic translation initiation factor 3 subunit G (Fragment) OS=Homo sapiens GN=EIF3G PE=1 SV=1|Eukaryotic translation initiation factor 3 subunit G (Fragment) OS=Homo sapiens GN=EIF3G PE=1 SV=7|Eukaryotic translation initiation factor 3 subunit G OS=Homo sapiens GN=EIF3G PE=1 SV=2	0.0406964	0.843009	0.944859	no hit	FALSE
STXBP1	P61764|P61764-2	Syntaxin-binding protein 1 OS=Homo sapiens GN=STXBP1 PE=1 SV=1|Isoform 2 of Syntaxin-binding protein 1 OS=Homo sapiens GN=STXBP1	0.0406779	0.66382	0.848247	no hit	FALSE
CEP85L	A2A3P3|Q5SZL2|Q5SZL2-4	Centrosomal protein of 85 kDa-like (Fragment) OS=Homo sapiens GN=CEP85L PE=1 SV=1|Centrosomal protein of 85 kDa-like OS=Homo sapiens GN=CEP85L PE=1 SV=1|Isoform 4 of Centrosomal protein of 85 kDa-like OS=Homo sapiens GN=CEP85L	0.0403077	0.739229	0.894316	no hit	FALSE
PHGDH	O43175|Q5SZU1	D-3-phosphoglycerate dehydrogenase OS=Homo sapiens GN=PHGDH PE=1 SV=1|D-3-phosphoglycerate dehydrogenase OS=Homo sapiens GN=PHGDH PE=1 SV=4	0.0402401	0.727115	0.886223	no hit	FALSE
CDC2|CDK1	A0A024QZP7|P06493	Cell division cycle 2, G1 to S and G2 to M, isoform CRA_a OS=Homo sapiens GN=CDC2 PE=1 SV=1|Cyclin-dependent kinase 1 OS=Homo sapiens GN=CDK1 PE=1 SV=3	0.0401303	0.733156	0.891631	no hit	FALSE
ANKRD27	Q96NW4	Ankyrin repeat domain-containing protein 27 OS=Homo sapiens GN=ANKRD27 PE=1 SV=2	0.039744	0.727164	0.886223	no hit	FALSE
KLHL11	Q9NVR0	Kelch-like protein 11 OS=Homo sapiens GN=KLHL11 PE=1 SV=1	0.0396428	0.770219	0.911522	no hit	FALSE
ERCC2	A8MX75|E7EVE9|P18074	TFIIH basal transcription factor complex helicase XPD subunit (Fragment) OS=Homo sapiens GN=ERCC2 PE=1 SV=2|TFIIH basal transcription factor complex helicase XPD subunit OS=Homo sapiens GN=ERCC2 PE=1 SV=1	0.0393805	0.720572	0.881944	no hit	FALSE
KLHL26	Q53HC5	Kelch-like protein 26 OS=Homo sapiens GN=KLHL26 PE=1 SV=2	0.0391063	0.758842	0.903646	no hit	FALSE
RAD50	Q92878|Q92878-2	DNA repair protein RAD50 OS=Homo sapiens GN=RAD50 PE=1 SV=1|Isoform 2 of DNA repair protein RAD50 OS=Homo sapiens GN=RAD50	0.039075	0.663264	0.848247	no hit	FALSE
MCM3AP	O60318	Germinal-center associated nuclear protein OS=Homo sapiens GN=MCM3AP PE=1 SV=2	0.0388814	0.710827	0.875121	no hit	FALSE
LOC102724159|PWP2	A0A0B4J2E5|Q15269	Protein LOC102724159 OS=Homo sapiens GN=LOC102724159 PE=1 SV=1|Periodic tryptophan protein 2 homolog OS=Homo sapiens GN=PWP2 PE=2 SV=2	0.0388149	0.718501	0.880779	no hit	FALSE
SARAF	Q96BY9	Store-operated calcium entry-associated regulatory factor OS=Homo sapiens GN=SARAF PE=1 SV=1	0.0383819	0.758889	0.903646	no hit	FALSE
IRF2BP1	Q8IU81	Interferon regulatory factor 2-binding protein 1 OS=Homo sapiens GN=IRF2BP1 PE=1 SV=1	0.0382721	0.742571	0.896668	no hit	FALSE
NEK4	P51957|P51957-2	Isoform 2 of Serine/threonine-protein kinase Nek4 OS=Homo sapiens GN=NEK4|Serine/threonine-protein kinase Nek4 OS=Homo sapiens GN=NEK4 PE=1 SV=2	0.03801	0.738477	0.894316	no hit	FALSE
PLK1	P53350	Serine/threonine-protein kinase PLK1 OS=Homo sapiens GN=PLK1 PE=1 SV=1	0.0379525	0.78744	0.918301	no hit	FALSE
SESN2	P58004	Sestrin-2 OS=Homo sapiens GN=SESN2 PE=1 SV=1	0.0379446	0.687539	0.863676	no hit	FALSE
HNRNPU	Q00839|Q00839-2	Heterogeneous nuclear ribonucleoprotein U OS=Homo sapiens GN=HNRNPU PE=1 SV=6|Isoform Short of Heterogeneous nuclear ribonucleoprotein U OS=Homo sapiens GN=HNRNPU	0.0375973	0.835431	0.943225	no hit	FALSE
DLG1	A0A0C4DFT3|Q12959|Q12959-2|Q12959-3|Q12959-4|Q12959-5|Q12959-6|Q12959-7	Disks large homolog 1 OS=Homo sapiens GN=DLG1 PE=1 SV=1|Disks large homolog 1 OS=Homo sapiens GN=DLG1 PE=1 SV=2|Isoform 2 of Disks large homolog 1 OS=Homo sapiens GN=DLG1|Isoform 3 of Disks large homolog 1 OS=Homo sapiens GN=DLG1|Isoform 4 of Disks large homolog 1 OS=Homo sapiens GN=DLG1|Isoform 5 of Disks large homolog 1 OS=Homo sapiens GN=DLG1|Isoform 6 of Disks large homolog 1 OS=Homo sapiens …	0.0375382	0.697791	0.867059	no hit	FALSE
EBF3	Q9H4W6|Q9H4W6-2	Transcription factor COE3 OS=Homo sapiens GN=EBF3 PE=1 SV=2|Isoform Short of Transcription factor COE3 OS=Homo sapiens GN=EBF3	0.0375359	0.779966	0.916408	no hit	FALSE
RPLP2	P05387	60S acidic ribosomal protein P2 OS=Homo sapiens GN=RPLP2 PE=1 SV=1	0.0374939	0.910431	0.959825	no hit	FALSE
UNC45A	Q9H3U1|Q9H3U1-2	Protein unc-45 homolog A OS=Homo sapiens GN=UNC45A PE=1 SV=1|Isoform 2 of Protein unc-45 homolog A OS=Homo sapiens GN=UNC45A	0.0373926	0.697629	0.867059	no hit	FALSE
DSTYK	Q6XUX3|Q6XUX3-2	Dual serine/threonine and tyrosine protein kinase OS=Homo sapiens GN=DSTYK PE=1 SV=2|Isoform 2 of Dual serine/threonine and tyrosine protein kinase OS=Homo sapiens GN=DSTYK	0.0368571	0.827704	0.940993	no hit	FALSE
HTATSF1	O43719	HIV Tat-specific factor 1 OS=Homo sapiens GN=HTATSF1 PE=1 SV=1	0.0368553	0.712667	0.876059	no hit	FALSE
LARP4B	Q92615	La-related protein 4B OS=Homo sapiens GN=LARP4B PE=1 SV=3	0.0367545	0.660853	0.847054	no hit	FALSE
ADD3	A0A087WX08|Q9UEY8|Q9UEY8-2	Gamma-adducin OS=Homo sapiens GN=ADD3 PE=1 SV=1|Isoform 1 of Gamma-adducin OS=Homo sapiens GN=ADD3	0.0365209	0.784577	0.917477	no hit	FALSE
GHDC	K7ESN3|Q8N2G8|Q8N2G8-2|Q8N2G8-3	GH3 domain-containing protein OS=Homo sapiens GN=GHDC PE=1 SV=1|GH3 domain-containing protein OS=Homo sapiens GN=GHDC PE=1 SV=2|Isoform 2 of GH3 domain-containing protein OS=Homo sapiens GN=GHDC|Isoform 3 of GH3 domain-containing protein OS=Homo sapiens GN=GHDC	0.0363741	0.750186	0.899994	no hit	FALSE
KAT7	O95251|O95251-2|O95251-4	Histone acetyltransferase KAT7 OS=Homo sapiens GN=KAT7 PE=1 SV=1|Isoform 2 of Histone acetyltransferase KAT7 OS=Homo sapiens GN=KAT7|Isoform 4 of Histone acetyltransferase KAT7 OS=Homo sapiens GN=KAT7	0.036316	0.748727	0.899617	no hit	FALSE
CLPTM1	O96005|O96005-4	Cleft lip and palate transmembrane protein 1 OS=Homo sapiens GN=CLPTM1 PE=1 SV=1|Isoform 3 of Cleft lip and palate transmembrane protein 1 OS=Homo sapiens GN=CLPTM1	0.0361687	0.822002	0.937899	no hit	FALSE
RBM5	P52756	RNA-binding protein 5 OS=Homo sapiens GN=RBM5 PE=1 SV=2	0.0360089	0.756449	0.902691	no hit	FALSE
STK11IP	C9JQV3|Q8N1F8|Q8N1F8-2	Isoform 2 of Serine/threonine-protein kinase 11-interacting protein OS=Homo sapiens GN=STK11IP|Serine/threonine-protein kinase 11-interacting protein OS=Homo sapiens GN=STK11IP PE=1 SV=1|Serine/threonine-protein kinase 11-interacting protein OS=Homo sapiens GN=STK11IP PE=1 SV=3	0.0358873	0.807464	0.928148	no hit	FALSE
IARS	A0A0A0MSX9|J3KR24|P41252	Isoleucine--tRNA ligase, cytoplasmic OS=Homo sapiens GN=IARS PE=1 SV=1|Isoleucine--tRNA ligase, cytoplasmic OS=Homo sapiens GN=IARS PE=1 SV=2	0.0357477	0.721738	0.882824	no hit	FALSE
RACGAP1	Q9H0H5	Rac GTPase-activating protein 1 OS=Homo sapiens GN=RACGAP1 PE=1 SV=1	0.0357129	0.825358	0.939005	no hit	FALSE
NUP160	Q12769	Nuclear pore complex protein Nup160 OS=Homo sapiens GN=NUP160 PE=1 SV=3	0.0356317	0.702889	0.869032	no hit	FALSE
DCAF11	H0YKR8|H0YL64|H0YLH4|H0YM86|H0YMN6|H0YN21|H0YN92|H0YNS2|Q8TEB1|Q8TEB1-2	DDB1- and CUL4-associated factor 11 (Fragment) OS=Homo sapiens GN=DCAF11 PE=1 SV=1|DDB1- and CUL4-associated factor 11 OS=Homo sapiens GN=DCAF11 PE=1 SV=1|Isoform 2 of DDB1- and CUL4-associated factor 11 OS=Homo sapiens GN=DCAF11	0.0355999	0.712702	0.876059	no hit	FALSE
MCM4	E5RG31|P33991	DNA helicase (Fragment) OS=Homo sapiens GN=MCM4 PE=1 SV=7|DNA replication licensing factor MCM4 OS=Homo sapiens GN=MCM4 PE=1 SV=5	0.035552	0.664525	0.848651	no hit	FALSE
DPYSL2	Q16555|Q16555-2	Dihydropyrimidinase-related protein 2 OS=Homo sapiens GN=DPYSL2 PE=1 SV=1|Isoform 2 of Dihydropyrimidinase-related protein 2 OS=Homo sapiens GN=DPYSL2	0.0353098	0.808432	0.928472	no hit	FALSE
AARS	P49588|P49588-2	Alanine--tRNA ligase, cytoplasmic OS=Homo sapiens GN=AARS PE=1 SV=2|Isoform 2 of Alanine--tRNA ligase, cytoplasmic OS=Homo sapiens GN=AARS	0.035176	0.738699	0.894316	no hit	FALSE
RPL21	G3V1B3|M0R181|P46778	60S ribosomal protein L21 (Fragment) OS=Homo sapiens GN=RPL21 PE=1 SV=1|60S ribosomal protein L21 OS=Homo sapiens GN=RPL21 PE=1 SV=1|60S ribosomal protein L21 OS=Homo sapiens GN=RPL21 PE=1 SV=2	0.0351188	0.715053	0.878605	no hit	FALSE
CDC16	Q13042|Q13042-2|Q13042-3|Q13042-4|Q5T8C6	Cell division cycle protein 16 homolog OS=Homo sapiens GN=CDC16 PE=1 SV=2|Isoform 2 of Cell division cycle protein 16 homolog OS=Homo sapiens GN=CDC16|Isoform 3 of Cell division cycle protein 16 homolog OS=Homo sapiens GN=CDC16|Isoform 4 of Cell division cycle protein 16 homolog OS=Homo sapiens GN=CDC16|Cell division cycle protein 16 homolog OS=Homo sapiens GN=CDC16 PE=1 SV=1	0.0350785	0.783741	0.91729	no hit	FALSE
RPL3	B5MCW2|P39023	60S ribosomal protein L3 (Fragment) OS=Homo sapiens GN=RPL3 PE=1 SV=1|60S ribosomal protein L3 OS=Homo sapiens GN=RPL3 PE=1 SV=2	0.0349557	0.70113	0.869032	no hit	FALSE
NARS	O43776	Asparagine--tRNA ligase, cytoplasmic OS=Homo sapiens GN=NARS PE=1 SV=1	0.034788	0.749803	0.89994	no hit	FALSE
KLHL23	H7C0F4|Q8NBE8	Kelch-like protein 23 (Fragment) OS=Homo sapiens GN=KLHL23 PE=1 SV=1|Kelch-like protein 23 OS=Homo sapiens GN=KLHL23 PE=1 SV=1	0.0346988	0.90878	0.959646	no hit	FALSE
AHCY	P23526	Adenosylhomocysteinase OS=Homo sapiens GN=AHCY PE=1 SV=4	0.0345299	0.748609	0.899617	no hit	FALSE
WHSC1	O96028	Histone-lysine N-methyltransferase NSD2 OS=Homo sapiens GN=WHSC1 PE=1 SV=1	0.0342888	0.770157	0.911522	no hit	FALSE
AGO2	Q9UKV8|Q9UKV8-2	Isoform 2 of Protein argonaute-2 OS=Homo sapiens GN=AGO2|Protein argonaute-2 OS=Homo sapiens GN=AGO2 PE=1 SV=3	0.0341796	0.733849	0.891953	no hit	FALSE
RPL34	P49207	60S ribosomal protein L34 OS=Homo sapiens GN=RPL34 PE=1 SV=3	0.0338344	0.7486	0.899617	no hit	FALSE
KDM2A	I3VM54|Q9Y2K7	Lysine-specific demethylase 2A OS=Homo sapiens GN=KDM2A PE=1 SV=1|Lysine-specific demethylase 2A OS=Homo sapiens GN=KDM2A PE=1 SV=3	0.0335368	0.721859	0.882824	no hit	FALSE
GSTO1	P78417|P78417-3|Q5TA02	Glutathione S-transferase omega-1 (Fragment) OS=Homo sapiens GN=GSTO1 PE=1 SV=1|Glutathione S-transferase omega-1 OS=Homo sapiens GN=GSTO1 PE=1 SV=2|Isoform 3 of Glutathione S-transferase omega-1 OS=Homo sapiens GN=GSTO1	0.0334845	0.851055	0.947305	no hit	FALSE
RRM2	P31350|P31350-2	Ribonucleoside-diphosphate reductase subunit M2 OS=Homo sapiens GN=RRM2 PE=1 SV=1|Isoform 2 of Ribonucleoside-diphosphate reductase subunit M2 OS=Homo sapiens GN=RRM2	0.0333892	0.802513	0.924857	no hit	FALSE
TRMT44	Q8IYL2	Probable tRNA (uracil-O(2)-)-methyltransferase OS=Homo sapiens GN=TRMT44 PE=1 SV=2	0.0333336	0.857497	0.948094	enriched no hit	FALSE
APPBP2	Q92624	Amyloid protein-binding protein 2 OS=Homo sapiens GN=APPBP2 PE=1 SV=2	0.0332936	0.787712	0.918301	no hit	FALSE
TRAPPC5	Q8IUR0	Trafficking protein particle complex subunit 5 OS=Homo sapiens GN=TRAPPC5 PE=1 SV=1	0.0330281	0.794612	0.920995	no hit	FALSE
SLC35B2	Q8TB61|Q8TB61-2|Q8TB61-3	Adenosine 3'-phospho 5'-phosphosulfate transporter 1 OS=Homo sapiens GN=SLC35B2 PE=1 SV=1|Isoform 2 of Adenosine 3'-phospho 5'-phosphosulfate transporter 1 OS=Homo sapiens GN=SLC35B2|Isoform 3 of Adenosine 3'-phospho 5'-phosphosulfate transporter 1 OS=Homo sapiens GN=SLC35B2	0.032931	0.733302	0.891631	no hit	FALSE
TRPM7	H0YLN8|Q96QT4	Transient receptor potential cation channel subfamily M member 7 OS=Homo sapiens GN=TRPM7 PE=1 SV=1|Transient receptor potential cation channel subfamily M member 7 OS=Homo sapiens GN=TRPM7 PE=1 SV=1	0.032881	0.795184	0.920995	no hit	FALSE
WDHD1	O75717	WD repeat and HMG-box DNA-binding protein 1 OS=Homo sapiens GN=WDHD1 PE=1 SV=1	0.0327217	0.740571	0.894596	no hit	FALSE
ZBTB11	O95625	Zinc finger and BTB domain-containing protein 11 OS=Homo sapiens GN=ZBTB11 PE=1 SV=2	0.0325618	0.775216	0.914685	no hit	FALSE
TOPBP1	Q92547	DNA topoisomerase 2-binding protein 1 OS=Homo sapiens GN=TOPBP1 PE=1 SV=3	0.03253	0.695224	0.866262	no hit	FALSE
FADS2	O95864	Fatty acid desaturase 2 OS=Homo sapiens GN=FADS2 PE=1 SV=1	0.0325119	0.780546	0.916509	no hit	FALSE
AMPD2	H0Y360|Q01433|Q01433-2|Q01433-3|Q01433-4|Q01433-5	AMP deaminase 2 (Fragment) OS=Homo sapiens GN=AMPD2 PE=1 SV=1|AMP deaminase 2 OS=Homo sapiens GN=AMPD2 PE=1 SV=2|Isoform 5 of AMP deaminase 2 OS=Homo sapiens GN=AMPD2|Isoform Ex1A-2-3 of AMP deaminase 2 OS=Homo sapiens GN=AMPD2|Isoform Ex1A-3 of AMP deaminase 2 OS=Homo sapiens GN=AMPD2|Isoform Ex1B-3 of AMP deaminase 2 OS=Homo sapiens GN=AMPD2	0.0324413	0.755697	0.902478	no hit	FALSE
HMGCS1	Q01581	Hydroxymethylglutaryl-CoA synthase, cytoplasmic OS=Homo sapiens GN=HMGCS1 PE=1 SV=2	0.0321879	0.71749	0.879882	no hit	FALSE
CSK	P41240	Tyrosine-protein kinase CSK OS=Homo sapiens GN=CSK PE=1 SV=1	0.0321274	0.749516	0.89994	no hit	FALSE
VPS29	F8VXU5|Q9UBQ0|Q9UBQ0-2	Vacuolar protein sorting-associated protein 29 OS=Homo sapiens GN=VPS29 PE=1 SV=1|Vacuolar protein sorting-associated protein 29 OS=Homo sapiens GN=VPS29 PE=1 SV=1|Isoform 2 of Vacuolar protein sorting-associated protein 29 OS=Homo sapiens GN=VPS29	0.0319864	0.794199	0.920995	no hit	FALSE
TNPO3	C9J7E5|E9PFH4|Q9Y5L0|Q9Y5L0-1|Q9Y5L0-3|Q9Y5L0-5	Isoform 1 of Transportin-3 OS=Homo sapiens GN=TNPO3|Isoform 3 of Transportin-3 OS=Homo sapiens GN=TNPO3|Isoform 4 of Transportin-3 OS=Homo sapiens GN=TNPO3|Transportin-3 OS=Homo sapiens GN=TNPO3 PE=1 SV=1|Transportin-3 OS=Homo sapiens GN=TNPO3 PE=1 SV=3	0.031841	0.768152	0.90976	no hit	FALSE
WDR11	Q9BZH6	WD repeat-containing protein 11 OS=Homo sapiens GN=WDR11 PE=1 SV=1	0.0318261	0.759076	0.903646	no hit	FALSE
BBS7	Q8IWZ6|Q8IWZ6-2	Bardet-Biedl syndrome 7 protein OS=Homo sapiens GN=BBS7 PE=1 SV=2|Isoform 2 of Bardet-Biedl syndrome 7 protein OS=Homo sapiens GN=BBS7	0.0318144	0.865253	0.948817	enriched no hit	FALSE
TOMM70	O94826	Mitochondrial import receptor subunit TOM70 OS=Homo sapiens GN=TOMM70 PE=1 SV=1	0.0312839	0.820505	0.93687	no hit	FALSE
RPAP2	Q8IXW5|Q8IXW5-2	Putative RNA polymerase II subunit B1 CTD phosphatase RPAP2 OS=Homo sapiens GN=RPAP2 PE=1 SV=1|Isoform 2 of Putative RNA polymerase II subunit B1 CTD phosphatase RPAP2 OS=Homo sapiens GN=RPAP2	0.0312439	0.746225	0.898654	no hit	FALSE
SLU7	O95391	Pre-mRNA-splicing factor SLU7 OS=Homo sapiens GN=SLU7 PE=1 SV=2	0.0311439	0.811976	0.931161	no hit	FALSE
TIPRL	O75663	TIP41-like protein OS=Homo sapiens GN=TIPRL PE=1 SV=2	0.031025	0.757853	0.903646	no hit	FALSE
EZH2	Q15910|Q15910-2|Q15910-3|Q15910-4|Q15910-5	Histone-lysine N-methyltransferase EZH2 OS=Homo sapiens GN=EZH2 PE=1 SV=2|Isoform 2 of Histone-lysine N-methyltransferase EZH2 OS=Homo sapiens GN=EZH2|Isoform 3 of Histone-lysine N-methyltransferase EZH2 OS=Homo sapiens GN=EZH2|Isoform 4 of Histone-lysine N-methyltransferase EZH2 OS=Homo sapiens GN=EZH2|Isoform 5 of Histone-lysine N-methyltransferase EZH2 OS=Homo sapiens GN=EZH2	0.0309216	0.751559	0.90052	no hit	FALSE
WDR46	O15213	WD repeat-containing protein 46 OS=Homo sapiens GN=WDR46 PE=1 SV=3	0.0303931	0.833745	0.942078	no hit	FALSE
RBM12	Q9NTZ6	RNA-binding protein 12 OS=Homo sapiens GN=RBM12 PE=1 SV=1	0.0300692	0.830792	0.941417	no hit	FALSE
GTPBP1	O00178	GTP-binding protein 1 OS=Homo sapiens GN=GTPBP1 PE=1 SV=3	0.029901	0.792704	0.920995	no hit	FALSE
FLOT2	E7EMK3|J3QLD9|Q14254	Flotillin-2 OS=Homo sapiens GN=FLOT2 PE=1 SV=1|Flotillin-2 OS=Homo sapiens GN=FLOT2 PE=1 SV=1|Flotillin-2 OS=Homo sapiens GN=FLOT2 PE=1 SV=2	0.0298452	0.844164	0.945335	no hit	FALSE
ARID3B	Q8IVW6|Q8IVW6-4	AT-rich interactive domain-containing protein 3B OS=Homo sapiens GN=ARID3B PE=1 SV=2|Isoform 4 of AT-rich interactive domain-containing protein 3B OS=Homo sapiens GN=ARID3B	0.029297	0.830508	0.941417	no hit	FALSE
ELP2	Q6IA86|Q6IA86-2|Q6IA86-3|Q6IA86-4|Q6IA86-5|Q6IA86-6|Q6IA86-7	Elongator complex protein 2 OS=Homo sapiens GN=ELP2 PE=1 SV=2|Isoform 2 of Elongator complex protein 2 OS=Homo sapiens GN=ELP2|Isoform 3 of Elongator complex protein 2 OS=Homo sapiens GN=ELP2|Isoform 4 of Elongator complex protein 2 OS=Homo sapiens GN=ELP2|Isoform 5 of Elongator complex protein 2 OS=Homo sapiens GN=ELP2|Isoform 6 of Elongator complex protein 2 OS=Homo sapiens GN=ELP2|Isoform 7 of…	0.0291528	0.817939	0.934957	no hit	FALSE
EIF4G3	A0A0A0MSA7|A0A0U1RQK7|O43432|O43432-3|O43432-4	Eukaryotic translation initiation factor 4 gamma 3 OS=Homo sapiens GN=EIF4G3 PE=1 SV=1|Eukaryotic translation initiation factor 4 gamma 3 OS=Homo sapiens GN=EIF4G3 PE=1 SV=2|Isoform 3 of Eukaryotic translation initiation factor 4 gamma 3 OS=Homo sapiens GN=EIF4G3|Isoform 4 of Eukaryotic translation initiation factor 4 gamma 3 OS=Homo sapiens GN=EIF4G3	0.0290876	0.842232	0.944859	no hit	FALSE
FLT4	E9PD35|P35916|P35916-1	Isoform 2 of Vascular endothelial growth factor receptor 3 OS=Homo sapiens GN=FLT4|Vascular endothelial growth factor receptor 3 OS=Homo sapiens GN=FLT4 PE=1 SV=1|Vascular endothelial growth factor receptor 3 OS=Homo sapiens GN=FLT4 PE=1 SV=3	0.0290426	0.847984	0.947169	no hit	FALSE
POLR2E	A0A087WWX0|A0A0A0MQR7|P19388	DNA-directed RNA polymerases I, II, and III subunit RPABC1 (Fragment) OS=Homo sapiens GN=POLR2E PE=1 SV=1|DNA-directed RNA polymerases I, II, and III subunit RPABC1 OS=Homo sapiens GN=POLR2E PE=1 SV=1|DNA-directed RNA polymerases I, II, and III subunit RPABC1 OS=Homo sapiens GN=POLR2E PE=1 SV=4	0.028849	0.798741	0.922052	no hit	FALSE
MTMR9	Q96QG7|Q96QG7-2	Isoform 2 of Myotubularin-related protein 9 OS=Homo sapiens GN=MTMR9|Myotubularin-related protein 9 OS=Homo sapiens GN=MTMR9 PE=1 SV=1	0.028825	0.792864	0.920995	no hit	FALSE
UBE2Z	Q9H832	Ubiquitin-conjugating enzyme E2 Z OS=Homo sapiens GN=UBE2Z PE=1 SV=2	0.0285675	0.850976	0.947305	no hit	FALSE
ANAPC5	F5GZ05|F5H0F9|Q9UJX4	Anaphase-promoting complex subunit 5 (Fragment) OS=Homo sapiens GN=ANAPC5 PE=1 SV=1|Anaphase-promoting complex subunit 5 OS=Homo sapiens GN=ANAPC5 PE=1 SV=1|Anaphase-promoting complex subunit 5 OS=Homo sapiens GN=ANAPC5 PE=1 SV=2	0.0285158	0.810192	0.929476	no hit	FALSE
SCRIB	A0A0G2JNZ2|A0A0G2JPP5|Q14160|Q14160-3	Protein scribble homolog OS=Homo sapiens GN=SCRIB PE=1 SV=1|Protein scribble homolog OS=Homo sapiens GN=SCRIB PE=1 SV=1|Protein scribble homolog OS=Homo sapiens GN=SCRIB PE=1 SV=4|Isoform 3 of Protein scribble homolog OS=Homo sapiens GN=SCRIB	0.0278411	0.830292	0.941417	no hit	FALSE
UTP18	Q9Y5J1	U3 small nucleolar RNA-associated protein 18 homolog OS=Homo sapiens GN=UTP18 PE=1 SV=3	0.0276612	0.799363	0.922432	no hit	FALSE
PI4KA	J3KN10|P42356	Phosphatidylinositol 4-kinase alpha OS=Homo sapiens GN=PI4KA PE=1 SV=1|Phosphatidylinositol 4-kinase alpha OS=Homo sapiens GN=PI4KA PE=1 SV=4	0.0276363	0.77461	0.914313	no hit	FALSE
ST7	B7Z4L1|B7Z4U3|C9JU30|E7EPD9|H7BXS2|Q9NRC1|Q9NRC1-4	Isoform 4 of Suppressor of tumorigenicity 7 protein OS=Homo sapiens GN=ST7|Suppression of tumorigenicity 7, isoform CRA_d OS=Homo sapiens GN=ST7 PE=1 SV=1|Suppressor of tumorigenicity 7 protein (Fragment) OS=Homo sapiens GN=ST7 PE=1 SV=1|Suppressor of tumorigenicity 7 protein OS=Homo sapiens GN=ST7 PE=1 SV=1	0.0275862	0.869617	0.949551	no hit	FALSE
SKAP2	O75563	Src kinase-associated phosphoprotein 2 OS=Homo sapiens GN=SKAP2 PE=1 SV=1	0.0273255	0.846809	0.946738	enriched no hit	FALSE
ESPL1	Q14674	Separin OS=Homo sapiens GN=ESPL1 PE=1 SV=3	0.0273098	0.795485	0.920995	no hit	FALSE
VPS35	Q96QK1	Vacuolar protein sorting-associated protein 35 OS=Homo sapiens GN=VPS35 PE=1 SV=2	0.0272392	0.787907	0.918301	no hit	FALSE
NUFIP1	Q9UHK0	Nuclear fragile X mental retardation-interacting protein 1 OS=Homo sapiens GN=NUFIP1 PE=1 SV=2	0.0269908	0.824182	0.938434	no hit	FALSE
COPB1	P53618	Coatomer subunit beta OS=Homo sapiens GN=COPB1 PE=1 SV=3	0.0268628	0.783759	0.91729	no hit	FALSE
RASSF8	Q8NHQ8	Ras association domain-containing protein 8 OS=Homo sapiens GN=RASSF8 PE=1 SV=2	0.0267134	0.835659	0.943225	no hit	FALSE
RTCB	Q9Y3I0	tRNA-splicing ligase RtcB homolog OS=Homo sapiens GN=RTCB PE=1 SV=1	0.02654	0.793715	0.920995	no hit	FALSE
EPB41L2	O43491|O43491-4	Band 4.1-like protein 2 OS=Homo sapiens GN=EPB41L2 PE=1 SV=1|Isoform 4 of Band 4.1-like protein 2 OS=Homo sapiens GN=EPB41L2	0.0265093	0.787369	0.918301	no hit	FALSE
TMEM237	Q96Q45|Q96Q45-2|Q96Q45-3|Q96Q45-5	Transmembrane protein 237 OS=Homo sapiens GN=TMEM237 PE=1 SV=2|Isoform 2 of Transmembrane protein 237 OS=Homo sapiens GN=TMEM237|Isoform 3 of Transmembrane protein 237 OS=Homo sapiens GN=TMEM237|Isoform 5 of Transmembrane protein 237 OS=Homo sapiens GN=TMEM237	0.0263702	0.851913	0.947305	no hit	FALSE
KIF1BP	Q96EK5	KIF1-binding protein OS=Homo sapiens GN=KIF1BP PE=1 SV=1	0.0263629	0.752904	0.90052	no hit	FALSE
MAPRE2	Q15555|Q15555-3|Q15555-4|Q15555-5	Microtubule-associated protein RP/EB family member 2 OS=Homo sapiens GN=MAPRE2 PE=1 SV=1|Isoform 3 of Microtubule-associated protein RP/EB family member 2 OS=Homo sapiens GN=MAPRE2|Isoform 4 of Microtubule-associated protein RP/EB family member 2 OS=Homo sapiens GN=MAPRE2|Isoform 5 of Microtubule-associated protein RP/EB family member 2 OS=Homo sapiens GN=MAPRE2	0.0260603	0.778604	0.915762	no hit	FALSE
BMS1	Q14692	Ribosome biogenesis protein BMS1 homolog OS=Homo sapiens GN=BMS1 PE=1 SV=1	0.0258178	0.851788	0.947305	no hit	FALSE
KIF24	Q5T7B8|Q5T7B8-2|Q5T7B8-4	Kinesin-like protein KIF24 OS=Homo sapiens GN=KIF24 PE=1 SV=2|Isoform 2 of Kinesin-like protein KIF24 OS=Homo sapiens GN=KIF24|Isoform 4 of Kinesin-like protein KIF24 OS=Homo sapiens GN=KIF24	0.0257487	0.835306	0.943225	no hit	FALSE
EFTUD2	Q15029|Q15029-3	116 kDa U5 small nuclear ribonucleoprotein component OS=Homo sapiens GN=EFTUD2 PE=1 SV=1|Isoform 3 of 116 kDa U5 small nuclear ribonucleoprotein component OS=Homo sapiens GN=EFTUD2	0.0257218	0.76626	0.908157	no hit	FALSE
PKM	P14618|P14618-2	Pyruvate kinase PKM OS=Homo sapiens GN=PKM PE=1 SV=4|Isoform M1 of Pyruvate kinase PKM OS=Homo sapiens GN=PKM	0.025676	0.796323	0.921288	no hit	FALSE
STAMBP	O95630	STAM-binding protein OS=Homo sapiens GN=STAMBP PE=1 SV=1	0.0256161	0.775781	0.914768	no hit	FALSE
TBL2	E9PF19|Q9Y4P3	Transducin beta-like protein 2 OS=Homo sapiens GN=TBL2 PE=1 SV=1|Transducin beta-like protein 2 OS=Homo sapiens GN=TBL2 PE=1 SV=1	0.0254849	0.840405	0.944859	no hit	FALSE
CNTROB	Q8N137|Q8N137-2|Q8N137-3|Q8N137-4|Q8N137-5	Centrobin OS=Homo sapiens GN=CNTROB PE=1 SV=1|Isoform 2 of Centrobin OS=Homo sapiens GN=CNTROB|Isoform 3 of Centrobin OS=Homo sapiens GN=CNTROB|Isoform 4 of Centrobin OS=Homo sapiens GN=CNTROB|Isoform 5 of Centrobin OS=Homo sapiens GN=CNTROB	0.0254146	0.856563	0.948094	no hit	FALSE
PPWD1	D6R9Q1|F5H7P7|Q96BP3|Q96BP3-2	Isoform 2 of Peptidylprolyl isomerase domain and WD repeat-containing protein 1 OS=Homo sapiens GN=PPWD1|Peptidylprolyl isomerase domain and WD repeat-containing protein 1 (Fragment) OS=Homo sapiens GN=PPWD1 PE=1 SV=1|Peptidylprolyl isomerase domain and WD repeat-containing protein 1 OS=Homo sapiens GN=PPWD1 PE=1 SV=1	0.0252954	0.837305	0.944073	no hit	FALSE
ORC2	Q13416	Origin recognition complex subunit 2 OS=Homo sapiens GN=ORC2 PE=1 SV=2	0.0249127	0.797429	0.921342	no hit	FALSE
HNRNPLL|HNRPLL	B7WPG3|C9IYN3|D6W592|Q8WVV9|Q8WVV9-4|Q8WVV9-5	Heterogeneous nuclear ribonucleoprotein L-like OS=Homo sapiens GN=HNRNPLL PE=1 SV=1|Heterogeneous nuclear ribonucleoprotein L-like OS=Homo sapiens GN=HNRNPLL PE=1 SV=2|Heterogeneous nuclear ribonucleoprotein L-like OS=Homo sapiens GN=HNRPLL PE=1 SV=1|Heterogeneous nuclear ribonucleoprotein L-like OS=Homo sapiens GN=HNRNPLL PE=1 SV=1|Isoform 4 of Heterogeneous nuclear ribonucleoprotein L-like OS=H…	0.0249104	0.829111	0.941417	no hit	FALSE
C19orf52	Q9BSF4	Uncharacterized protein C19orf52 OS=Homo sapiens GN=C19orf52 PE=1 SV=2	0.0247693	0.824944	0.938874	no hit	FALSE
TTC12	A8MTE9|E9PKU6|J3KR69|Q9H892|Q9H892-2	Isoform 2 of Tetratricopeptide repeat protein 12 OS=Homo sapiens GN=TTC12|Tetratricopeptide repeat domain 12, isoform CRA_d OS=Homo sapiens GN=TTC12 PE=1 SV=1|Tetratricopeptide repeat protein 12 (Fragment) OS=Homo sapiens GN=TTC12 PE=1 SV=1|Tetratricopeptide repeat protein 12 OS=Homo sapiens GN=TTC12 PE=1 SV=1|Tetratricopeptide repeat protein 12 OS=Homo sapiens GN=TTC12 PE=1 SV=2	0.0246352	0.896893	0.953934	no hit	FALSE
SIL1	D6REA1|Q9H173	Nucleotide exchange factor SIL1 OS=Homo sapiens GN=SIL1 PE=1 SV=1	0.0243062	0.841488	0.944859	no hit	FALSE
PDXP	Q96GD0	Pyridoxal phosphate phosphatase OS=Homo sapiens GN=PDXP PE=1 SV=2	0.0240025	0.80264	0.924857	no hit	FALSE
WDR74	Q6RFH5|Q6RFH5-2	WD repeat-containing protein 74 OS=Homo sapiens GN=WDR74 PE=1 SV=1|Isoform 2 of WD repeat-containing protein 74 OS=Homo sapiens GN=WDR74	0.0239402	0.867134	0.948817	no hit	FALSE
NOL11	Q9H8H0	Nucleolar protein 11 OS=Homo sapiens GN=NOL11 PE=1 SV=1	0.0237232	0.797079	0.921342	no hit	FALSE
ORC1	Q13415	Origin recognition complex subunit 1 OS=Homo sapiens GN=ORC1 PE=1 SV=2	0.0236801	0.793217	0.920995	no hit	FALSE
EMD	P50402	Emerin OS=Homo sapiens GN=EMD PE=1 SV=1	0.0236375	0.852981	0.947823	no hit	FALSE
UBAP2L	F8W726|Q14157|Q14157-1|Q14157-3|Q14157-4|Q14157-5	Isoform 2 of Ubiquitin-associated protein 2-like OS=Homo sapiens GN=UBAP2L|Isoform 3 of Ubiquitin-associated protein 2-like OS=Homo sapiens GN=UBAP2L|Isoform 4 of Ubiquitin-associated protein 2-like OS=Homo sapiens GN=UBAP2L|Isoform 5 of Ubiquitin-associated protein 2-like OS=Homo sapiens GN=UBAP2L|Ubiquitin-associated protein 2-like OS=Homo sapiens GN=UBAP2L PE=1 SV=2	0.0235557	0.867562	0.948817	no hit	FALSE
TWISTNB	Q3B726	DNA-directed RNA polymerase I subunit RPA43 OS=Homo sapiens GN=TWISTNB PE=1 SV=1	0.0231051	0.874344	0.951123	no hit	FALSE
FAM63A	Q8N5J2|Q8N5J2-2|Q8N5J2-3|Q8N5J2-4	Isoform 2 of Protein FAM63A OS=Homo sapiens GN=FAM63A|Isoform 3 of Protein FAM63A OS=Homo sapiens GN=FAM63A|Isoform 4 of Protein FAM63A OS=Homo sapiens GN=FAM63A|Protein FAM63A OS=Homo sapiens GN=FAM63A PE=1 SV=2	0.0230199	0.845728	0.946231	no hit	FALSE
SAMD1	E9PIW9|Q6SPF0	Atherin OS=Homo sapiens GN=SAMD1 PE=1 SV=1	0.022927	0.851655	0.947305	no hit	FALSE
MPRIP	Q6WCQ1|Q6WCQ1-2|Q6WCQ1-3	Isoform 2 of Myosin phosphatase Rho-interacting protein OS=Homo sapiens GN=MPRIP|Isoform 3 of Myosin phosphatase Rho-interacting protein OS=Homo sapiens GN=MPRIP|Myosin phosphatase Rho-interacting protein OS=Homo sapiens GN=MPRIP PE=1 SV=3	0.0227668	0.861786	0.948236	no hit	FALSE
DNAJA2	O60884	DnaJ homolog subfamily A member 2 OS=Homo sapiens GN=DNAJA2 PE=1 SV=1	0.0227185	0.856325	0.948094	no hit	FALSE
NOB1	Q9ULX3	RNA-binding protein NOB1 OS=Homo sapiens GN=NOB1 PE=1 SV=1	0.0226044	0.803222	0.925189	no hit	FALSE
NUP153	P49790|P49790-3	Isoform 3 of Nuclear pore complex protein Nup153 OS=Homo sapiens GN=NUP153|Nuclear pore complex protein Nup153 OS=Homo sapiens GN=NUP153 PE=1 SV=2	0.0225739	0.87753	0.951123	no hit	FALSE
BAZ2A	F8VU39|J3KPG5|Q9UIF9|Q9UIF9-2|Q9UIF9-3	Bromodomain adjacent to zinc finger domain protein 2A OS=Homo sapiens GN=BAZ2A PE=1 SV=1|Bromodomain adjacent to zinc finger domain protein 2A OS=Homo sapiens GN=BAZ2A PE=1 SV=1|Bromodomain adjacent to zinc finger domain protein 2A OS=Homo sapiens GN=BAZ2A PE=1 SV=4|Isoform 1 of Bromodomain adjacent to zinc finger domain protein 2A OS=Homo sapiens GN=BAZ2A|Isoform 3 of Bromodomain adjacent to zin…	0.0223654	0.864944	0.948817	no hit	FALSE
AP2B1	A0A087X253|P63010|P63010-2	AP-2 complex subunit beta OS=Homo sapiens GN=AP2B1 PE=1 SV=1|AP-2 complex subunit beta OS=Homo sapiens GN=AP2B1 PE=1 SV=1|Isoform 2 of AP-2 complex subunit beta OS=Homo sapiens GN=AP2B1	0.0223086	0.841195	0.944859	no hit	FALSE
USP10	Q14694|Q14694-2|Q14694-3	Ubiquitin carboxyl-terminal hydrolase 10 OS=Homo sapiens GN=USP10 PE=1 SV=2|Isoform 2 of Ubiquitin carboxyl-terminal hydrolase 10 OS=Homo sapiens GN=USP10|Isoform 3 of Ubiquitin carboxyl-terminal hydrolase 10 OS=Homo sapiens GN=USP10	0.0222189	0.837501	0.944073	no hit	FALSE
TEX2	A0A087WVA8|J3KRZ8|Q8IWB9|Q8IWB9-2	Isoform 2 of Testis-expressed sequence 2 protein OS=Homo sapiens GN=TEX2|Testis-expressed sequence 2 protein (Fragment) OS=Homo sapiens GN=TEX2 PE=1 SV=1|Testis-expressed sequence 2 protein OS=Homo sapiens GN=TEX2 PE=1 SV=1|Testis-expressed sequence 2 protein OS=Homo sapiens GN=TEX2 PE=1 SV=2	0.0220791	0.863994	0.948817	no hit	FALSE
TTLL5	G3V2J9|G3V4R8|Q6EMB2|Q6EMB2-2	Isoform 2 of Tubulin polyglutamylase TTLL5 OS=Homo sapiens GN=TTLL5|Tubulin polyglutamylase TTLL5 OS=Homo sapiens GN=TTLL5 PE=1 SV=1|Tubulin polyglutamylase TTLL5 OS=Homo sapiens GN=TTLL5 PE=1 SV=3	0.022073	0.884361	0.951123	no hit	FALSE
DNAJC3	Q13217	DnaJ homolog subfamily C member 3 OS=Homo sapiens GN=DNAJC3 PE=1 SV=1	0.0218357	0.808312	0.928472	no hit	FALSE
DHX37	Q8IY37	Probable ATP-dependent RNA helicase DHX37 OS=Homo sapiens GN=DHX37 PE=1 SV=1	0.0217362	0.784126	0.91729	no hit	FALSE
SLK	Q9H2G2|Q9H2G2-2	STE20-like serine/threonine-protein kinase OS=Homo sapiens GN=SLK PE=1 SV=1|Isoform 2 of STE20-like serine/threonine-protein kinase OS=Homo sapiens GN=SLK	0.0216863	0.856577	0.948094	no hit	FALSE
MTA1	E7ESY4|Q13330|Q13330-3	Isoform 3 of Metastasis-associated protein MTA1 OS=Homo sapiens GN=MTA1|Metastasis-associated protein MTA1 OS=Homo sapiens GN=MTA1 PE=1 SV=1|Metastasis-associated protein MTA1 OS=Homo sapiens GN=MTA1 PE=1 SV=2	0.0215403	0.881922	0.951123	no hit	FALSE
PRPF4	O43172|O43172-2	Isoform 2 of U4/U6 small nuclear ribonucleoprotein Prp4 OS=Homo sapiens GN=PRPF4|U4/U6 small nuclear ribonucleoprotein Prp4 OS=Homo sapiens GN=PRPF4 PE=1 SV=2	0.0214923	0.81667	0.934185	no hit	FALSE
SNX9	A0A087WYU1|Q9Y5X1	Sorting nexin OS=Homo sapiens GN=SNX9 PE=1 SV=1|Sorting nexin-9 OS=Homo sapiens GN=SNX9 PE=1 SV=1	0.0212287	0.883181	0.951123	no hit	FALSE
BAZ1A	Q9NRL2	Bromodomain adjacent to zinc finger domain protein 1A OS=Homo sapiens GN=BAZ1A PE=1 SV=2	0.0211543	0.852752	0.947823	no hit	FALSE
MYH10	P35580|P35580-2|P35580-3|P35580-4|P35580-5	Myosin-10 OS=Homo sapiens GN=MYH10 PE=1 SV=3|Isoform 2 of Myosin-10 OS=Homo sapiens GN=MYH10|Isoform 3 of Myosin-10 OS=Homo sapiens GN=MYH10|Isoform 4 of Myosin-10 OS=Homo sapiens GN=MYH10|Isoform 5 of Myosin-10 OS=Homo sapiens GN=MYH10	0.0207683	0.83791	0.944073	no hit	FALSE
MID1	A0A087X255|O15344|O15344-2	E3 ubiquitin-protein ligase Midline-1 OS=Homo sapiens GN=MID1 PE=1 SV=1|Isoform 2 of E3 ubiquitin-protein ligase Midline-1 OS=Homo sapiens GN=MID1	0.0207538	0.862123	0.948275	no hit	FALSE
ATXN2	F8VQP2|F8WB06|H0YH87|Q99700|Q99700-2|Q99700-4|Q99700-5|V9GY86	Ataxin-2 (Fragment) OS=Homo sapiens GN=ATXN2 PE=1 SV=1|Ataxin-2 OS=Homo sapiens GN=ATXN2 PE=1 SV=1|Ataxin-2 OS=Homo sapiens GN=ATXN2 PE=1 SV=2|Isoform 2 of Ataxin-2 OS=Homo sapiens GN=ATXN2|Isoform 4 of Ataxin-2 OS=Homo sapiens GN=ATXN2|Isoform 5 of Ataxin-2 OS=Homo sapiens GN=ATXN2	0.020741	0.867957	0.948817	no hit	FALSE
COPG2	Q9UBF2	Coatomer subunit gamma-2 OS=Homo sapiens GN=COPG2 PE=1 SV=1	0.0207325	0.833613	0.942078	no hit	FALSE
RPL7L1	Q6DKI1	60S ribosomal protein L7-like 1 OS=Homo sapiens GN=RPL7L1 PE=1 SV=1	0.0204122	0.869489	0.949551	no hit	FALSE
IPO4	H0YN14|Q8TEX9|Q8TEX9-2	Importin-4 OS=Homo sapiens GN=IPO4 PE=1 SV=1|Importin-4 OS=Homo sapiens GN=IPO4 PE=1 SV=2|Isoform 2 of Importin-4 OS=Homo sapiens GN=IPO4	0.0204047	0.867936	0.948817	no hit	FALSE
URB2	Q14146	Unhealthy ribosome biogenesis protein 2 homolog OS=Homo sapiens GN=URB2 PE=2 SV=2	0.0204041	0.836575	0.94392	no hit	FALSE
ERCC6	Q03468	DNA excision repair protein ERCC-6 OS=Homo sapiens GN=ERCC6 PE=1 SV=1	0.0202399	0.863102	0.948689	no hit	FALSE
HSPA5	P11021	78 kDa glucose-regulated protein OS=Homo sapiens GN=HSPA5 PE=1 SV=2	0.0198788	0.870883	0.95009	no hit	FALSE
NLE1	A0A0A0MRH0|Q9NVX2|Q9NVX2-2	Isoform 2 of Notchless protein homolog 1 OS=Homo sapiens GN=NLE1|Notchless protein homolog 1 OS=Homo sapiens GN=NLE1 PE=1 SV=1|Notchless protein homolog 1 OS=Homo sapiens GN=NLE1 PE=1 SV=4	0.0197382	0.832263	0.941417	no hit	FALSE
FLVCR1	Q9Y5Y0	Feline leukemia virus subgroup C receptor-related protein 1 OS=Homo sapiens GN=FLVCR1 PE=1 SV=1	0.0193764	0.892935	0.953934	no hit	FALSE
DIAPH1	A0A0G2JH68|A0A140T8Z0|O60610|O60610-2|O60610-3	Protein diaphanous homolog 1 OS=Homo sapiens GN=DIAPH1 PE=1 SV=1|Protein diaphanous homolog 1 OS=Homo sapiens GN=DIAPH1 PE=1 SV=1|Protein diaphanous homolog 1 OS=Homo sapiens GN=DIAPH1 PE=1 SV=2|Isoform 2 of Protein diaphanous homolog 1 OS=Homo sapiens GN=DIAPH1|Isoform 3 of Protein diaphanous homolog 1 OS=Homo sapiens GN=DIAPH1	0.0190385	0.868041	0.948817	no hit	FALSE
WDR82	Q6UXN9	WD repeat-containing protein 82 OS=Homo sapiens GN=WDR82 PE=1 SV=1	0.01849	0.85611	0.948094	no hit	FALSE
EIF3E	P60228	Eukaryotic translation initiation factor 3 subunit E OS=Homo sapiens GN=EIF3E PE=1 SV=1	0.0184435	0.873646	0.951123	no hit	FALSE
EEF2K	O00418	Eukaryotic elongation factor 2 kinase OS=Homo sapiens GN=EEF2K PE=1 SV=2	0.0182814	0.874139	0.951123	no hit	FALSE
PSMD13	A0A087WUL9|J3KNQ3|Q9UNM6|Q9UNM6-2	26S proteasome non-ATPase regulatory subunit 13 OS=Homo sapiens GN=PSMD13 PE=1 SV=1|26S proteasome non-ATPase regulatory subunit 13 OS=Homo sapiens GN=PSMD13 PE=1 SV=2|Isoform 2 of 26S proteasome non-ATPase regulatory subunit 13 OS=Homo sapiens GN=PSMD13	0.0182384	0.907316	0.95911	no hit	FALSE
KIF4A	O95239|O95239-2	Chromosome-associated kinesin KIF4A OS=Homo sapiens GN=KIF4A PE=1 SV=3|Isoform 2 of Chromosome-associated kinesin KIF4A OS=Homo sapiens GN=KIF4A	0.0181491	0.860889	0.948236	no hit	FALSE
RBM14	Q96PK6	RNA-binding protein 14 OS=Homo sapiens GN=RBM14 PE=1 SV=2	0.0179841	0.87754	0.951123	no hit	FALSE
ORC4	O43929|O43929-2|O43929-3	Origin recognition complex subunit 4 OS=Homo sapiens GN=ORC4 PE=1 SV=2|Isoform 2 of Origin recognition complex subunit 4 OS=Homo sapiens GN=ORC4|Isoform 3 of Origin recognition complex subunit 4 OS=Homo sapiens GN=ORC4	0.017899	0.887926	0.95204	no hit	FALSE
KDM1A	O60341|O60341-2	Lysine-specific histone demethylase 1A OS=Homo sapiens GN=KDM1A PE=1 SV=2|Isoform 2 of Lysine-specific histone demethylase 1A OS=Homo sapiens GN=KDM1A	0.0177503	0.845837	0.946231	no hit	FALSE
DCTN4	Q9UJW0|Q9UJW0-2|Q9UJW0-3	Dynactin subunit 4 OS=Homo sapiens GN=DCTN4 PE=1 SV=1|Isoform 2 of Dynactin subunit 4 OS=Homo sapiens GN=DCTN4|Isoform 3 of Dynactin subunit 4 OS=Homo sapiens GN=DCTN4	0.0174839	0.877849	0.951123	no hit	FALSE
PREB	Q9HCU5	Prolactin regulatory element-binding protein OS=Homo sapiens GN=PREB PE=1 SV=2	0.0174714	0.884681	0.951123	no hit	FALSE
TTF2	Q9UNY4	Transcription termination factor 2 OS=Homo sapiens GN=TTF2 PE=1 SV=2	0.0174433	0.850267	0.947305	no hit	FALSE
PRMT9	Q6P2P2|Q6P2P2-2	Isoform 2 of Putative protein arginine N-methyltransferase 9 OS=Homo sapiens GN=PRMT9|Putative protein arginine N-methyltransferase 9 OS=Homo sapiens GN=PRMT9 PE=2 SV=1	0.0170588	0.882257	0.951123	no hit	FALSE
MAP4K5	A0A0A0MQR1|Q9Y4K4	Mitogen-activated protein kinase kinase kinase kinase OS=Homo sapiens GN=MAP4K5 PE=1 SV=1|Mitogen-activated protein kinase kinase kinase kinase 5 OS=Homo sapiens GN=MAP4K5 PE=1 SV=1	0.0170307	0.875429	0.951123	no hit	FALSE
CEP290	J3KNF5|O15078	Centrosomal protein of 290 kDa OS=Homo sapiens GN=CEP290 PE=1 SV=1|Centrosomal protein of 290 kDa OS=Homo sapiens GN=CEP290 PE=1 SV=2	0.0169731	0.909801	0.959795	no hit	FALSE
BCAP31	P51572|P51572-2	B-cell receptor-associated protein 31 OS=Homo sapiens GN=BCAP31 PE=1 SV=3|Isoform 2 of B-cell receptor-associated protein 31 OS=Homo sapiens GN=BCAP31	0.0169409	0.91406	0.961323	no hit	FALSE
ZC3H14	G3V256|Q6PJT7|Q6PJT7-2|Q6PJT7-3|Q6PJT7-4|Q6PJT7-5|Q6PJT7-9	Isoform 2 of Zinc finger CCCH domain-containing protein 14 OS=Homo sapiens GN=ZC3H14|Isoform 3 of Zinc finger CCCH domain-containing protein 14 OS=Homo sapiens GN=ZC3H14|Isoform 4 of Zinc finger CCCH domain-containing protein 14 OS=Homo sapiens GN=ZC3H14|Isoform 5 of Zinc finger CCCH domain-containing protein 14 OS=Homo sapiens GN=ZC3H14|Isoform 9 of Zinc finger CCCH domain-containing protein 14 …	0.0169398	0.858453	0.948094	no hit	FALSE
TCP1	F5H136|P17987	T-complex protein 1 subunit alpha (Fragment) OS=Homo sapiens GN=TCP1 PE=1 SV=1|T-complex protein 1 subunit alpha OS=Homo sapiens GN=TCP1 PE=1 SV=1	0.0163244	0.897682	0.953934	no hit	FALSE
PARP1	P09874	Poly [ADP-ribose] polymerase 1 OS=Homo sapiens GN=PARP1 PE=1 SV=4	0.01622	0.907728	0.959224	no hit	FALSE
GFPT2	O94808	Glutamine--fructose-6-phosphate aminotransferase [isomerizing] 2 OS=Homo sapiens GN=GFPT2 PE=1 SV=3	0.0159772	0.913911	0.961323	enriched no hit	FALSE
PTPN23	Q9H3S7	Tyrosine-protein phosphatase non-receptor type 23 OS=Homo sapiens GN=PTPN23 PE=1 SV=1	0.0159699	0.884082	0.951123	no hit	FALSE
CEPT1	Q9Y6K0	Choline/ethanolaminephosphotransferase 1 OS=Homo sapiens GN=CEPT1 PE=1 SV=1	0.0159383	0.879409	0.951123	no hit	FALSE
RCL1	Q9Y2P8	RNA 3'-terminal phosphate cyclase-like protein OS=Homo sapiens GN=RCL1 PE=1 SV=3	0.0157602	0.894553	0.953934	no hit	FALSE
HAT1	O14929	Histone acetyltransferase type B catalytic subunit OS=Homo sapiens GN=HAT1 PE=1 SV=1	0.0156918	0.876006	0.951123	no hit	FALSE
TOP2B	Q02880|Q02880-2	DNA topoisomerase 2-beta OS=Homo sapiens GN=TOP2B PE=1 SV=3|Isoform Beta-1 of DNA topoisomerase 2-beta OS=Homo sapiens GN=TOP2B	0.0155041	0.861575	0.948236	no hit	FALSE
KMT2A	Q03164|Q03164-2|Q03164-3	Histone-lysine N-methyltransferase 2A OS=Homo sapiens GN=KMT2A PE=1 SV=5|Isoform 2 of Histone-lysine N-methyltransferase 2A OS=Homo sapiens GN=KMT2A|Isoform 3 of Histone-lysine N-methyltransferase 2A OS=Homo sapiens GN=KMT2A	0.0153344	0.865033	0.948817	no hit	FALSE
OTUB1	F5GYJ8|F5GYN4|J3KR44|Q96FW1	Ubiquitin thioesterase OTUB1 OS=Homo sapiens GN=OTUB1 PE=1 SV=1|Ubiquitin thioesterase OTUB1 OS=Homo sapiens GN=OTUB1 PE=1 SV=2	0.0150053	0.930634	0.969757	no hit	FALSE
UTP4	A0A0J9YWM9|H3BSH7|Q969X6	U3 small nucleolar RNA-associated protein 4 homolog (Fragment) OS=Homo sapiens GN=UTP4 PE=1 SV=1|U3 small nucleolar RNA-associated protein 4 homolog OS=Homo sapiens GN=UTP4 PE=1 SV=1	0.0148891	0.895093	0.953934	no hit	FALSE
CARS	B4DKY1|P49589|P49589-2|P49589-3	Cysteine--tRNA ligase, cytoplasmic OS=Homo sapiens GN=CARS PE=1 SV=1|Cysteine--tRNA ligase, cytoplasmic OS=Homo sapiens GN=CARS PE=1 SV=3|Isoform 2 of Cysteine--tRNA ligase, cytoplasmic OS=Homo sapiens GN=CARS|Isoform 3 of Cysteine--tRNA ligase, cytoplasmic OS=Homo sapiens GN=CARS	0.014871	0.898252	0.953934	no hit	FALSE
GART	P22102	Trifunctional purine biosynthetic protein adenosine-3 OS=Homo sapiens GN=GART PE=1 SV=1	0.0147452	0.877034	0.951123	no hit	FALSE
GIGYF2	I1E4Y6|Q6Y7W6|Q6Y7W6-3|Q6Y7W6-4|Q6Y7W6-5	Isoform 2 of PERQ amino acid-rich with GYF domain-containing protein 2 OS=Homo sapiens GN=GIGYF2|Isoform 3 of PERQ amino acid-rich with GYF domain-containing protein 2 OS=Homo sapiens GN=GIGYF2|Isoform 4 of PERQ amino acid-rich with GYF domain-containing protein 2 OS=Homo sapiens GN=GIGYF2|PERQ amino acid-rich with GYF domain-containing protein 2 OS=Homo sapiens GN=GIGYF2 PE=1 SV=1	0.0145397	0.891877	0.953934	no hit	FALSE
DHX35	Q5THR1|Q9H5Z1|Q9H5Z1-2	Probable ATP-dependent RNA helicase DHX35 OS=Homo sapiens GN=DHX35 PE=1 SV=1|Probable ATP-dependent RNA helicase DHX35 OS=Homo sapiens GN=DHX35 PE=1 SV=2|Isoform 2 of Probable ATP-dependent RNA helicase DHX35 OS=Homo sapiens GN=DHX35	0.0144706	0.90268	0.956136	no hit	FALSE
PSMC4	P43686	26S protease regulatory subunit 6B OS=Homo sapiens GN=PSMC4 PE=1 SV=2	0.0143865	0.93301	0.970774	no hit	FALSE
RPL7A	P62424	60S ribosomal protein L7a OS=Homo sapiens GN=RPL7A PE=1 SV=2	0.0141991	0.858479	0.948094	no hit	FALSE
EDC4	Q6P2E9	Enhancer of mRNA-decapping protein 4 OS=Homo sapiens GN=EDC4 PE=1 SV=1	0.0140159	0.885167	0.951123	no hit	FALSE
GNA11	P29992	Guanine nucleotide-binding protein subunit alpha-11 OS=Homo sapiens GN=GNA11 PE=1 SV=2	0.0134636	0.891307	0.953934	no hit	FALSE
HSP90AB1	P08238	Heat shock protein HSP 90-beta OS=Homo sapiens GN=HSP90AB1 PE=1 SV=4	0.0134399	0.917934	0.963862	no hit	FALSE
RPL32	D3YTB1|F8W727|P62910	60S ribosomal protein L32 (Fragment) OS=Homo sapiens GN=RPL32 PE=1 SV=1|60S ribosomal protein L32 OS=Homo sapiens GN=RPL32 PE=1 SV=1|60S ribosomal protein L32 OS=Homo sapiens GN=RPL32 PE=1 SV=2	0.0130847	0.911505	0.960154	no hit	FALSE
FNDC3A	Q9Y2H6|Q9Y2H6-2	Fibronectin type-III domain-containing protein 3A OS=Homo sapiens GN=FNDC3A PE=1 SV=4|Isoform 2 of Fibronectin type-III domain-containing protein 3A OS=Homo sapiens GN=FNDC3A	0.0129616	0.883825	0.951123	no hit	FALSE
EHMT1	A0A0D9SEQ1|Q9H9B1|Q9H9B1-3	Histone-lysine N-methyltransferase EHMT1 (Fragment) OS=Homo sapiens GN=EHMT1 PE=1 SV=3|Histone-lysine N-methyltransferase EHMT1 OS=Homo sapiens GN=EHMT1 PE=1 SV=4|Isoform 3 of Histone-lysine N-methyltransferase EHMT1 OS=Homo sapiens GN=EHMT1	0.012951	0.89679	0.953934	no hit	FALSE
TJP1	A0A087X0K9|G3V1L9|G5E9E7|Q07157|Q07157-2	Tight junction protein ZO-1 OS=Homo sapiens GN=TJP1 PE=1 SV=1|Tight junction protein 1 (Zona occludens 1), isoform CRA_a OS=Homo sapiens GN=TJP1 PE=1 SV=1|Tight junction protein 1 (Zona occludens 1), isoform CRA_e OS=Homo sapiens GN=TJP1 PE=1 SV=1|Tight junction protein ZO-1 OS=Homo sapiens GN=TJP1 PE=1 SV=3|Isoform Short of Tight junction protein ZO-1 OS=Homo sapiens GN=TJP1	0.0129505	0.928372	0.969325	no hit	FALSE
WWOX	Q9NZC7|Q9NZC7-2	Isoform 2 of WW domain-containing oxidoreductase OS=Homo sapiens GN=WWOX|WW domain-containing oxidoreductase OS=Homo sapiens GN=WWOX PE=1 SV=1	0.012747	0.913832	0.961323	no hit	FALSE
LAMC1	P11047	Laminin subunit gamma-1 OS=Homo sapiens GN=LAMC1 PE=1 SV=3	0.0126887	0.908301	0.959507	no hit	FALSE
WDR48	Q8TAF3|Q8TAF3-3|Q8TAF3-4	Isoform 3 of WD repeat-containing protein 48 OS=Homo sapiens GN=WDR48|Isoform 4 of WD repeat-containing protein 48 OS=Homo sapiens GN=WDR48|WD repeat-containing protein 48 OS=Homo sapiens GN=WDR48 PE=1 SV=1	0.0126446	0.895631	0.953934	no hit	FALSE
MSH2	P43246	DNA mismatch repair protein Msh2 OS=Homo sapiens GN=MSH2 PE=1 SV=1	0.0125801	0.882822	0.951123	no hit	FALSE
STT3A	P46977	Dolichyl-diphosphooligosaccharide--protein glycosyltransferase subunit STT3A OS=Homo sapiens GN=STT3A PE=1 SV=2	0.0125613	0.895513	0.953934	no hit	FALSE
SLC33A1	O00400	Acetyl-coenzyme A transporter 1 OS=Homo sapiens GN=SLC33A1 PE=1 SV=1	0.012537	0.911658	0.960154	no hit	FALSE
TRAF7	Q6Q0C0|Q6Q0C0-2	E3 ubiquitin-protein ligase TRAF7 OS=Homo sapiens GN=TRAF7 PE=1 SV=1|Isoform 2 of E3 ubiquitin-protein ligase TRAF7 OS=Homo sapiens GN=TRAF7	0.0125234	0.897875	0.953934	no hit	FALSE
CWF19L2	H0YE03|H7C3G7|Q2TBE0|Q2TBE0-2|Q2TBE0-3	CWF19-like protein 2 (Fragment) OS=Homo sapiens GN=CWF19L2 PE=1 SV=1|CWF19-like protein 2 OS=Homo sapiens GN=CWF19L2 PE=1 SV=4|Isoform 2 of CWF19-like protein 2 OS=Homo sapiens GN=CWF19L2|Isoform 3 of CWF19-like protein 2 OS=Homo sapiens GN=CWF19L2	0.0124695	0.914295	0.961323	no hit	FALSE
TAOK2	Q9UL54|Q9UL54-2	Isoform 2 of Serine/threonine-protein kinase TAO2 OS=Homo sapiens GN=TAOK2|Serine/threonine-protein kinase TAO2 OS=Homo sapiens GN=TAOK2 PE=1 SV=2	0.0124687	0.904775	0.957067	no hit	FALSE
RABGGTA	H0YLH3|Q92696	Geranylgeranyl transferase type-2 subunit alpha OS=Homo sapiens GN=RABGGTA PE=1 SV=1|Geranylgeranyl transferase type-2 subunit alpha OS=Homo sapiens GN=RABGGTA PE=1 SV=2	0.0123695	0.89959	0.954469	no hit	FALSE
TTC38	Q5R3I4	Tetratricopeptide repeat protein 38 OS=Homo sapiens GN=TTC38 PE=1 SV=1	0.0122192	0.882727	0.951123	no hit	FALSE
PRIM2	P49643	DNA primase large subunit OS=Homo sapiens GN=PRIM2 PE=1 SV=2	0.0119945	0.915246	0.961681	enriched no hit	FALSE
CCT8	P50990|P50990-2	Isoform 2 of T-complex protein 1 subunit theta OS=Homo sapiens GN=CCT8|T-complex protein 1 subunit theta OS=Homo sapiens GN=CCT8 PE=1 SV=4	0.0119802	0.920287	0.964494	no hit	FALSE
GNB1L	Q9BYB4	Guanine nucleotide-binding protein subunit beta-like protein 1 OS=Homo sapiens GN=GNB1L PE=1 SV=2	0.0118531	0.899989	0.95457	no hit	FALSE
SLC30A7	Q8NEW0	Zinc transporter 7 OS=Homo sapiens GN=SLC30A7 PE=2 SV=1	0.0118099	0.917838	0.963862	no hit	FALSE
PTPRF	P10586|P10586-2	Receptor-type tyrosine-protein phosphatase F OS=Homo sapiens GN=PTPRF PE=1 SV=2|Isoform 2 of Receptor-type tyrosine-protein phosphatase F OS=Homo sapiens GN=PTPRF	0.0116988	0.886845	0.95153	no hit	FALSE
SLC38A10	Q9HBR0|Q9HBR0-2|Q9HBR0-3	Isoform 2 of Putative sodium-coupled neutral amino acid transporter 10 OS=Homo sapiens GN=SLC38A10|Isoform 3 of Putative sodium-coupled neutral amino acid transporter 10 OS=Homo sapiens GN=SLC38A10|Putative sodium-coupled neutral amino acid transporter 10 OS=Homo sapiens GN=SLC38A10 PE=1 SV=2	0.0115676	0.934219	0.970921	no hit	FALSE
TGFBRAP1	Q8WUH2	Transforming growth factor-beta receptor-associated protein 1 OS=Homo sapiens GN=TGFBRAP1 PE=1 SV=1	0.0114789	0.921294	0.964494	no hit	FALSE
SEC16A	F1T0I1|J3KNL6|O15027|O15027-2|O15027-3|O15027-4|O15027-5	Isoform 2 of Protein transport protein Sec16A OS=Homo sapiens GN=SEC16A|Isoform 3 of Protein transport protein Sec16A OS=Homo sapiens GN=SEC16A|Isoform 4 of Protein transport protein Sec16A OS=Homo sapiens GN=SEC16A|Isoform 5 of Protein transport protein Sec16A OS=Homo sapiens GN=SEC16A|Protein transport protein Sec16A OS=Homo sapiens GN=SEC16A PE=1 SV=1|Protein transport protein Sec16A OS=Homo s…	0.0113909	0.907295	0.95911	no hit	FALSE
CRYZL1	A6NHJ8|A6NMA8|A6NND8|C9K0F7|O95825	Quinone oxidoreductase-like protein 1 (Fragment) OS=Homo sapiens GN=CRYZL1 PE=1 SV=1|Quinone oxidoreductase-like protein 1 OS=Homo sapiens GN=CRYZL1 PE=1 SV=1|Quinone oxidoreductase-like protein 1 OS=Homo sapiens GN=CRYZL1 PE=1 SV=2	0.0110723	0.924597	0.966345	no hit	FALSE
MKRN2	C9J494|Q9H000|Q9H000-2	Probable E3 ubiquitin-protein ligase makorin-2 OS=Homo sapiens GN=MKRN2 PE=1 SV=1|Probable E3 ubiquitin-protein ligase makorin-2 OS=Homo sapiens GN=MKRN2 PE=1 SV=2|Isoform 2 of Probable E3 ubiquitin-protein ligase makorin-2 OS=Homo sapiens GN=MKRN2	0.0109288	0.894953	0.953934	no hit	FALSE
JPH1	Q9HDC5	Junctophilin-1 OS=Homo sapiens GN=JPH1 PE=1 SV=2	0.010835	0.923188	0.965513	no hit	FALSE
PIK3R4	Q99570	Phosphoinositide 3-kinase regulatory subunit 4 OS=Homo sapiens GN=PIK3R4 PE=1 SV=3	0.0107872	0.920046	0.964494	no hit	FALSE
SEC23A	F5H365|Q15436	Protein transport protein Sec23A OS=Homo sapiens GN=SEC23A PE=1 SV=1|Protein transport protein Sec23A OS=Homo sapiens GN=SEC23A PE=1 SV=2	0.0107297	0.955327	0.981224	no hit	FALSE
SLC25A20	C9JPE1|O43772	Mitochondrial carnitine/acylcarnitine carrier protein OS=Homo sapiens GN=SLC25A20 PE=1 SV=1	0.0106487	0.897314	0.953934	no hit	FALSE
CDC40	O60508|Q5SRN1	Pre-mRNA-processing factor 17 OS=Homo sapiens GN=CDC40 PE=1 SV=1|Pre-mRNA-processing factor 17 OS=Homo sapiens GN=CDC40 PE=1 SV=1	0.0104718	0.936312	0.972454	no hit	FALSE
POLA1	A0A087WU64|A6NMQ1|P09884	DNA polymerase OS=Homo sapiens GN=POLA1 PE=1 SV=1|DNA polymerase OS=Homo sapiens GN=POLA1 PE=1 SV=1|DNA polymerase alpha catalytic subunit OS=Homo sapiens GN=POLA1 PE=1 SV=2	0.0102326	0.931186	0.970011	no hit	FALSE
GLRX3	O76003	Glutaredoxin-3 OS=Homo sapiens GN=GLRX3 PE=1 SV=2	0.0102158	0.946877	0.97666	no hit	FALSE
EDEM3	Q9BZQ6|Q9BZQ6-2	ER degradation-enhancing alpha-mannosidase-like protein 3 OS=Homo sapiens GN=EDEM3 PE=1 SV=2|Isoform 2 of ER degradation-enhancing alpha-mannosidase-like protein 3 OS=Homo sapiens GN=EDEM3	0.0100626	0.929391	0.969425	no hit	FALSE
TOE1	Q96GM8	Target of EGR1 protein 1 OS=Homo sapiens GN=TOE1 PE=1 SV=1	0.010058	0.929023	0.969425	no hit	FALSE
DNM2	P50570|P50570-2|P50570-3|P50570-4|P50570-5	Dynamin-2 OS=Homo sapiens GN=DNM2 PE=1 SV=2|Isoform 2 of Dynamin-2 OS=Homo sapiens GN=DNM2|Isoform 3 of Dynamin-2 OS=Homo sapiens GN=DNM2|Isoform 4 of Dynamin-2 OS=Homo sapiens GN=DNM2|Isoform 5 of Dynamin-2 OS=Homo sapiens GN=DNM2	0.00997486	0.918355	0.963982	no hit	FALSE
COPS7A	F5GYF7|F5H248|F5H7C6|Q9UBW8	COP9 signalosome complex subunit 7a (Fragment) OS=Homo sapiens GN=COPS7A PE=1 SV=1|COP9 signalosome complex subunit 7a (Fragment) OS=Homo sapiens GN=COPS7A PE=1 SV=7|COP9 signalosome complex subunit 7a OS=Homo sapiens GN=COPS7A PE=1 SV=1	0.00980918	0.94575	0.976513	no hit	FALSE
CENPV	Q7Z7K6|Q7Z7K6-3	Centromere protein V OS=Homo sapiens GN=CENPV PE=1 SV=1|Isoform 3 of Centromere protein V OS=Homo sapiens GN=CENPV	0.00940732	0.938381	0.97332	no hit	FALSE
PARP2	G3V167|Q9UGN5|Q9UGN5-2	Poly [ADP-ribose] polymerase OS=Homo sapiens GN=PARP2 PE=1 SV=1|Poly [ADP-ribose] polymerase 2 OS=Homo sapiens GN=PARP2 PE=1 SV=2|Isoform 2 of Poly [ADP-ribose] polymerase 2 OS=Homo sapiens GN=PARP2	0.00929053	0.942459	0.974727	no hit	FALSE
DHX29	A0A087WYN9|Q7Z478	ATP-dependent RNA helicase DHX29 OS=Homo sapiens GN=DHX29 PE=1 SV=1|ATP-dependent RNA helicase DHX29 OS=Homo sapiens GN=DHX29 PE=1 SV=2	0.00927108	0.921698	0.964596	no hit	FALSE
RBBP7	Q16576	Histone-binding protein RBBP7 OS=Homo sapiens GN=RBBP7 PE=1 SV=1	0.00848201	0.951295	0.979292	no hit	FALSE
MCMBP	Q9BTE3|Q9BTE3-2	Mini-chromosome maintenance complex-binding protein OS=Homo sapiens GN=MCMBP PE=1 SV=2|Isoform 2 of Mini-chromosome maintenance complex-binding protein OS=Homo sapiens GN=MCMBP	0.00821562	0.937041	0.97251	no hit	FALSE
TNIP1	A0A0A0MRZ4|E7EMV7|Q15025|Q15025-2|Q15025-3|Q15025-4|Q15025-5|Q15025-6|Q15025-7|Q15025-8	TNFAIP3-interacting protein 1 OS=Homo sapiens GN=TNIP1 PE=1 SV=1|TNFAIP3-interacting protein 1 OS=Homo sapiens GN=TNIP1 PE=1 SV=1|TNFAIP3-interacting protein 1 OS=Homo sapiens GN=TNIP1 PE=1 SV=2|Isoform 2 of TNFAIP3-interacting protein 1 OS=Homo sapiens GN=TNIP1|Isoform 3 of TNFAIP3-interacting protein 1 OS=Homo sapiens GN=TNIP1|Isoform 4 of TNFAIP3-interacting protein 1 OS=Homo sapiens GN=TNIP1|…	0.00819149	0.939689	0.973522	no hit	FALSE
ZC3HC1	C9J0I9|Q86WB0	Nuclear-interacting partner of ALK OS=Homo sapiens GN=ZC3HC1 PE=1 SV=1|Nuclear-interacting partner of ALK OS=Homo sapiens GN=ZC3HC1 PE=1 SV=1	0.00795243	0.939573	0.973522	no hit	FALSE
DNAJC10	Q8IXB1|Q8IXB1-2	DnaJ homolog subfamily C member 10 OS=Homo sapiens GN=DNAJC10 PE=1 SV=2|Isoform 2 of DnaJ homolog subfamily C member 10 OS=Homo sapiens GN=DNAJC10	0.00745579	0.933151	0.970774	no hit	FALSE
METTL13	Q8N6R0|Q8N6R0-3|Q8N6R0-4	Isoform 2 of Methyltransferase-like protein 13 OS=Homo sapiens GN=METTL13|Isoform 3 of Methyltransferase-like protein 13 OS=Homo sapiens GN=METTL13|Methyltransferase-like protein 13 OS=Homo sapiens GN=METTL13 PE=1 SV=1	0.00743938	0.955665	0.981224	no hit	FALSE
EDRF1	Q3B7T1|Q3B7T1-5	Erythroid differentiation-related factor 1 OS=Homo sapiens GN=EDRF1 PE=1 SV=1|Isoform 4 of Erythroid differentiation-related factor 1 OS=Homo sapiens GN=EDRF1	0.00721285	0.940123	0.973522	no hit	FALSE
PPM1A	P35813|P35813-2|P35813-3	Isoform 3 of Protein phosphatase 1A OS=Homo sapiens GN=PPM1A|Isoform Alpha-2 of Protein phosphatase 1A OS=Homo sapiens GN=PPM1A|Protein phosphatase 1A OS=Homo sapiens GN=PPM1A PE=1 SV=1	0.00706711	0.940062	0.973522	no hit	FALSE
BBS1	Q8NFJ9|Q8NFJ9-2|Q8NFJ9-3	Bardet-Biedl syndrome 1 protein OS=Homo sapiens GN=BBS1 PE=1 SV=1|Isoform 2 of Bardet-Biedl syndrome 1 protein OS=Homo sapiens GN=BBS1|Isoform 3 of Bardet-Biedl syndrome 1 protein OS=Homo sapiens GN=BBS1	0.0070298	0.965359	0.985712	no hit	FALSE
FAIM	C9JDZ2|Q9NVQ4|Q9NVQ4-2|Q9NVQ4-3	Fas apoptotic inhibitory molecule 1 (Fragment) OS=Homo sapiens GN=FAIM PE=1 SV=1|Fas apoptotic inhibitory molecule 1 OS=Homo sapiens GN=FAIM PE=1 SV=1|Isoform 2 of Fas apoptotic inhibitory molecule 1 OS=Homo sapiens GN=FAIM|Isoform 3 of Fas apoptotic inhibitory molecule 1 OS=Homo sapiens GN=FAIM	0.00701894	0.931856	0.970388	no hit	FALSE
ACOT7	O00154|O00154-4|O00154-5|O00154-6|O00154-7	Cytosolic acyl coenzyme A thioester hydrolase OS=Homo sapiens GN=ACOT7 PE=1 SV=3|Isoform 4 of Cytosolic acyl coenzyme A thioester hydrolase OS=Homo sapiens GN=ACOT7|Isoform 5 of Cytosolic acyl coenzyme A thioester hydrolase OS=Homo sapiens GN=ACOT7|Isoform 6 of Cytosolic acyl coenzyme A thioester hydrolase OS=Homo sapiens GN=ACOT7|Isoform 7 of Cytosolic acyl coenzyme A thioester hydrolase OS=Homo…	0.00700382	0.950378	0.978669	no hit	FALSE
WDR91	A4D1P6|A4D1P6-2|A4D1P6-3	WD repeat-containing protein 91 OS=Homo sapiens GN=WDR91 PE=1 SV=2|Isoform 2 of WD repeat-containing protein 91 OS=Homo sapiens GN=WDR91|Isoform 3 of WD repeat-containing protein 91 OS=Homo sapiens GN=WDR91	0.00686404	0.966734	0.985953	no hit	FALSE
AHNAK	Q09666	Neuroblast differentiation-associated protein AHNAK OS=Homo sapiens GN=AHNAK PE=1 SV=2	0.00679435	0.958207	0.981912	no hit	FALSE
DRG2	A8MZF9|P55039	Developmentally-regulated GTP-binding protein 2 OS=Homo sapiens GN=DRG2 PE=1 SV=1	0.00654323	0.943057	0.974953	no hit	FALSE
SMC2	O95347	Structural maintenance of chromosomes protein 2 OS=Homo sapiens GN=SMC2 PE=1 SV=2	0.00632877	0.952686	0.98025	no hit	FALSE
SBDS	A0A087X020|Q9Y3A5	Ribosome maturation protein SBDS OS=Homo sapiens GN=SBDS PE=1 SV=1|Ribosome maturation protein SBDS OS=Homo sapiens GN=SBDS PE=1 SV=4	0.00627956	0.942436	0.974727	no hit	FALSE
PIGA	P37287|P37287-3	Phosphatidylinositol N-acetylglucosaminyltransferase subunit A OS=Homo sapiens GN=PIGA PE=1 SV=1|Isoform 3 of Phosphatidylinositol N-acetylglucosaminyltransferase subunit A OS=Homo sapiens GN=PIGA	0.00616354	0.949262	0.978276	no hit	FALSE
RFC1	P35251|P35251-2	Replication factor C subunit 1 OS=Homo sapiens GN=RFC1 PE=1 SV=4|Isoform 2 of Replication factor C subunit 1 OS=Homo sapiens GN=RFC1	0.00599528	0.965898	0.985943	no hit	FALSE
PRKDC	P78527	DNA-dependent protein kinase catalytic subunit OS=Homo sapiens GN=PRKDC PE=1 SV=3	0.0059302	0.942348	0.974727	no hit	FALSE
PRKCD	Q05655|Q05655-2	Isoform 2 of Protein kinase C delta type OS=Homo sapiens GN=PRKCD|Protein kinase C delta type OS=Homo sapiens GN=PRKCD PE=1 SV=2	0.00586092	0.946533	0.97666	no hit	FALSE
DHX38	Q92620	Pre-mRNA-splicing factor ATP-dependent RNA helicase PRP16 OS=Homo sapiens GN=DHX38 PE=1 SV=2	0.00583951	0.945803	0.976513	no hit	FALSE
MRI1	Q9BV20	Methylthioribose-1-phosphate isomerase OS=Homo sapiens GN=MRI1 PE=1 SV=1	0.0056212	0.958981	0.982386	no hit	FALSE
NCDN	Q9UBB6|Q9UBB6-2|Q9UBB6-3	Neurochondrin OS=Homo sapiens GN=NCDN PE=1 SV=1|Isoform 2 of Neurochondrin OS=Homo sapiens GN=NCDN|Isoform 3 of Neurochondrin OS=Homo sapiens GN=NCDN	0.00554265	0.957668	0.981747	no hit	FALSE
CBR1	P16152	Carbonyl reductase [NADPH] 1 OS=Homo sapiens GN=CBR1 PE=1 SV=3	0.00524375	0.971825	0.988147	enriched no hit	FALSE
PPID	Q08752	Peptidyl-prolyl cis-trans isomerase D OS=Homo sapiens GN=PPID PE=1 SV=3	0.00506329	0.976652	0.990496	no hit	FALSE
RPL23	P62829	60S ribosomal protein L23 OS=Homo sapiens GN=RPL23 PE=1 SV=1	0.00493722	0.959872	0.982446	no hit	FALSE
PHF6	A0A0D9SGE8|Q8IWS0|Q8IWS0-3|Q8IWS0-5	Isoform 3 of PHD finger protein 6 OS=Homo sapiens GN=PHF6|Isoform 5 of PHD finger protein 6 OS=Homo sapiens GN=PHF6|PHD finger protein 6 OS=Homo sapiens GN=PHF6 PE=1 SV=1	0.00488303	0.963084	0.984309	no hit	FALSE
POLD3	Q15054|Q15054-2|Q15054-3	DNA polymerase delta subunit 3 OS=Homo sapiens GN=POLD3 PE=1 SV=2|Isoform 2 of DNA polymerase delta subunit 3 OS=Homo sapiens GN=POLD3|Isoform 3 of DNA polymerase delta subunit 3 OS=Homo sapiens GN=POLD3	0.00485916	0.968128	0.98662	no hit	FALSE
APTX	A0A0A0MRW7|C9JZ40|F8W6G5|Q7Z2E3|Q7Z2E3-10|Q7Z2E3-11|Q7Z2E3-2|Q7Z2E3-3|Q7Z2E3-4|Q7Z2E3-5|Q7Z2E3-6|Q7Z2E3-7|Q7Z2E3-8|Q7Z2E3-9	Aprataxin (Fragment) OS=Homo sapiens GN=APTX PE=1 SV=1|Aprataxin OS=Homo sapiens GN=APTX PE=1 SV=1|Aprataxin OS=Homo sapiens GN=APTX PE=1 SV=2|Isoform 10 of Aprataxin OS=Homo sapiens GN=APTX|Isoform 11 of Aprataxin OS=Homo sapiens GN=APTX|Isoform 2 of Aprataxin OS=Homo sapiens GN=APTX|Isoform 3 of Aprataxin OS=Homo sapiens GN=APTX|Isoform 4 of Aprataxin OS=Homo sapiens GN=APTX|Isoform 5 of Aprata…	0.00452171	0.966847	0.985953	enriched no hit	FALSE
SND1	Q7KZF4	Staphylococcal nuclease domain-containing protein 1 OS=Homo sapiens GN=SND1 PE=1 SV=1	0.00436367	0.957727	0.981747	no hit	FALSE
SLC7A2	P52569|P52569-2|P52569-3	Cationic amino acid transporter 2 OS=Homo sapiens GN=SLC7A2 PE=1 SV=2|Isoform 2 of Cationic amino acid transporter 2 OS=Homo sapiens GN=SLC7A2|Isoform 3 of Cationic amino acid transporter 2 OS=Homo sapiens GN=SLC7A2	0.00420354	0.984354	0.994782	no hit	FALSE
PPP2R1B	P30154|P30154-2|P30154-4	Isoform 2 of Serine/threonine-protein phosphatase 2A 65 kDa regulatory subunit A beta isoform OS=Homo sapiens GN=PPP2R1B|Isoform 4 of Serine/threonine-protein phosphatase 2A 65 kDa regulatory subunit A beta isoform OS=Homo sapiens GN=PPP2R1B|Serine/threonine-protein phosphatase 2A 65 kDa regulatory subunit A beta isoform OS=Homo sapiens GN=PPP2R1B PE=1 SV=3	0.00414371	0.981188	0.993177	no hit	FALSE
LRCH2	Q5VUJ6|Q5VUJ6-2	Leucine-rich repeat and calponin homology domain-containing protein 2 OS=Homo sapiens GN=LRCH2 PE=2 SV=2|Isoform 2 of Leucine-rich repeat and calponin homology domain-containing protein 2 OS=Homo sapiens GN=LRCH2	0.00409897	0.988744	0.995948	no hit	FALSE
CCDC47	Q96A33	Coiled-coil domain-containing protein 47 OS=Homo sapiens GN=CCDC47 PE=1 SV=1	0.00407516	0.971148	0.987834	no hit	FALSE
SLC4A2	J3KNG9|P04920|P04920-2|P04920-3	Anion exchange protein 2 OS=Homo sapiens GN=SLC4A2 PE=1 SV=4|Anion exchange protein OS=Homo sapiens GN=SLC4A2 PE=1 SV=1|Isoform 3 of Anion exchange protein 2 OS=Homo sapiens GN=SLC4A2|Isoform B1 of Anion exchange protein 2 OS=Homo sapiens GN=SLC4A2	0.00392953	0.972504	0.9882	no hit	FALSE
PMF1	Q6P1K2|Q6P1K2-2|Q6P1K2-4	Polyamine-modulated factor 1 OS=Homo sapiens GN=PMF1 PE=1 SV=2|Isoform 2 of Polyamine-modulated factor 1 OS=Homo sapiens GN=PMF1|Isoform 4 of Polyamine-modulated factor 1 OS=Homo sapiens GN=PMF1	0.00369876	0.98346	0.994517	no hit	FALSE
DPF2	J3KMZ8|Q92785	Zinc finger protein ubi-d4 OS=Homo sapiens GN=DPF2 PE=1 SV=1|Zinc finger protein ubi-d4 OS=Homo sapiens GN=DPF2 PE=1 SV=2	0.00351703	0.972205	0.9882	no hit	FALSE
GGCX	P38435|P38435-2	Isoform 2 of Vitamin K-dependent gamma-carboxylase OS=Homo sapiens GN=GGCX|Vitamin K-dependent gamma-carboxylase OS=Homo sapiens GN=GGCX PE=1 SV=2	0.00348061	0.9735	0.988892	no hit	FALSE
ELP3	B4DKA4|Q9H9T3|Q9H9T3-2|Q9H9T3-4|Q9H9T3-5	Elongator complex protein 3 OS=Homo sapiens GN=ELP3 PE=1 SV=1|Elongator complex protein 3 OS=Homo sapiens GN=ELP3 PE=1 SV=2|Isoform 2 of Elongator complex protein 3 OS=Homo sapiens GN=ELP3|Isoform 3 of Elongator complex protein 3 OS=Homo sapiens GN=ELP3|Isoform 4 of Elongator complex protein 3 OS=Homo sapiens GN=ELP3	0.00341259	0.971202	0.987834	no hit	FALSE
PALD1	Q9ULE6	Paladin OS=Homo sapiens GN=PALD1 PE=1 SV=3	0.00335639	0.971022	0.987834	no hit	FALSE
GBA	A0A0G2JLB3|A0A0G2JNZ0|A0A0G2JNZ5|P04062|P04062-2|P04062-3|P04062-4|P04062-5	Glucosylceramidase OS=Homo sapiens GN=GBA PE=1 SV=1|Glucosylceramidase OS=Homo sapiens GN=GBA PE=1 SV=3|Isoform 3 of Glucosylceramidase OS=Homo sapiens GN=GBA|Isoform 4 of Glucosylceramidase OS=Homo sapiens GN=GBA|Isoform 5 of Glucosylceramidase OS=Homo sapiens GN=GBA|Isoform Short of Glucosylceramidase OS=Homo sapiens GN=GBA	0.00303687	0.985569	0.995133	no hit	FALSE
IDE	P14735	Insulin-degrading enzyme OS=Homo sapiens GN=IDE PE=1 SV=4	0.00227411	0.981916	0.993275	no hit	FALSE
TLK2	J3QLK5|Q86UE8|Q86UE8-2|Q86UE8-3	Isoform 2 of Serine/threonine-protein kinase tousled-like 2 OS=Homo sapiens GN=TLK2|Isoform 3 of Serine/threonine-protein kinase tousled-like 2 OS=Homo sapiens GN=TLK2|Serine/threonine-protein kinase tousled-like 2 OS=Homo sapiens GN=TLK2 PE=1 SV=1|Serine/threonine-protein kinase tousled-like 2 OS=Homo sapiens GN=TLK2 PE=1 SV=2	0.0019845	0.984977	0.995092	no hit	FALSE
SMARCC1	Q92922	SWI/SNF complex subunit SMARCC1 OS=Homo sapiens GN=SMARCC1 PE=1 SV=3	0.00191605	0.987691	0.995638	no hit	FALSE
DDX47	Q9H0S4|Q9H0S4-2	Isoform 2 of Probable ATP-dependent RNA helicase DDX47 OS=Homo sapiens GN=DDX47|Probable ATP-dependent RNA helicase DDX47 OS=Homo sapiens GN=DDX47 PE=1 SV=1	0.00150136	0.989497	0.996138	no hit	FALSE
PARP4	Q9UKK3	Poly [ADP-ribose] polymerase 4 OS=Homo sapiens GN=PARP4 PE=1 SV=3	0.00149191	0.991212	0.996299	no hit	FALSE
RHEB	Q15382	GTP-binding protein Rheb OS=Homo sapiens GN=RHEB PE=1 SV=1	0.00126362	0.990735	0.996299	no hit	FALSE
PPP6R3	E9PKF6|E9PQP7|H7BXH2|Q5H9R7|Q5H9R7-2|Q5H9R7-3|Q5H9R7-4|Q5H9R7-5|Q5H9R7-6	Isoform 2 of Serine/threonine-protein phosphatase 6 regulatory subunit 3 OS=Homo sapiens GN=PPP6R3|Isoform 3 of Serine/threonine-protein phosphatase 6 regulatory subunit 3 OS=Homo sapiens GN=PPP6R3|Isoform 4 of Serine/threonine-protein phosphatase 6 regulatory subunit 3 OS=Homo sapiens GN=PPP6R3|Isoform 5 of Serine/threonine-protein phosphatase 6 regulatory subunit 3 OS=Homo sapiens GN=PPP6R3|Iso…	0.00122788	0.994401	0.997569	no hit	FALSE
DMAP1	Q9NPF5	DNA methyltransferase 1-associated protein 1 OS=Homo sapiens GN=DMAP1 PE=1 SV=1	0.00118272	0.989809	0.996138	no hit	FALSE
NONO	Q15233	Non-POU domain-containing octamer-binding protein OS=Homo sapiens GN=NONO PE=1 SV=4	0.0011691	0.992291	0.996724	no hit	FALSE
ARPC1B	O15143	Actin-related protein 2/3 complex subunit 1B OS=Homo sapiens GN=ARPC1B PE=1 SV=3	0.00113747	0.991407	0.996299	no hit	FALSE
CUL4B	K4DI93|Q13620|Q13620-1	Cullin 4B, isoform CRA_e OS=Homo sapiens GN=CUL4B PE=1 SV=1|Cullin-4B OS=Homo sapiens GN=CUL4B PE=1 SV=4|Isoform 2 of Cullin-4B OS=Homo sapiens GN=CUL4B	0.00112685	0.990421	0.996299	no hit	FALSE
SSR4	P51571	Translocon-associated protein subunit delta OS=Homo sapiens GN=SSR4 PE=1 SV=1	0.000941959	0.994237	0.997569	no hit	FALSE
RUVBL1	Q9Y265	RuvB-like 1 OS=Homo sapiens GN=RUVBL1 PE=1 SV=1	0.000679131	0.994397	0.997569	no hit	FALSE
DDX52	Q9Y2R4	Probable ATP-dependent RNA helicase DDX52 OS=Homo sapiens GN=DDX52 PE=1 SV=3	0.000632873	0.995383	0.997919	no hit	FALSE
RPL18A	M0R0P7|M0R117|M0R1A7|M0R3D6|Q02543	60S ribosomal protein L18a (Fragment) OS=Homo sapiens GN=RPL18A PE=1 SV=1|60S ribosomal protein L18a OS=Homo sapiens GN=RPL18A PE=1 SV=1|60S ribosomal protein L18a OS=Homo sapiens GN=RPL18A PE=1 SV=2	0.00045225	0.9962	0.99842	no hit	FALSE
IPO8	O15397	Importin-8 OS=Homo sapiens GN=IPO8 PE=1 SV=2	0.000262576	0.998088	0.999041	no hit	FALSE
POLR1B	Q9H9Y6|Q9H9Y6-2|Q9H9Y6-3	DNA-directed RNA polymerase I subunit RPA2 OS=Homo sapiens GN=POLR1B PE=1 SV=2|Isoform 2 of DNA-directed RNA polymerase I subunit RPA2 OS=Homo sapiens GN=POLR1B|Isoform 3 of DNA-directed RNA polymerase I subunit RPA2 OS=Homo sapiens GN=POLR1B	5.05e-05	0.999651	0.999892	no hit	FALSE
EEF1A1|EEF1A1P5	P68104|Q5VTE0	Elongation factor 1-alpha 1 OS=Homo sapiens GN=EEF1A1 PE=1 SV=1|Putative elongation factor 1-alpha-like 3 OS=Homo sapiens GN=EEF1A1P5 PE=5 SV=1	4.82e-05	0.999648	0.999892	no hit	FALSE
SMARCE1	B4DGM3|Q969G3|Q969G3-2	SWI/SNF-related matrix-associated actin-dependent regulator of chromatin subfamily E member 1 OS=Homo sapiens GN=SMARCE1 PE=1 SV=1|SWI/SNF-related matrix-associated actin-dependent regulator of chromatin subfamily E member 1 OS=Homo sapiens GN=SMARCE1 PE=1 SV=2|Isoform 2 of SWI/SNF-related matrix-associated actin-dependent regulator of chromatin subfamily E member 1 OS=Homo sapiens GN=SMARCE1	1.48e-05	0.999892	0.999892	no hit	FALSE
NUP155	O75694|O75694-2	Isoform 2 of Nuclear pore complex protein Nup155 OS=Homo sapiens GN=NUP155|Nuclear pore complex protein Nup155 OS=Homo sapiens GN=NUP155 PE=1 SV=1	-0.000321077	0.9973	0.998569	no hit	FALSE
MARCHF7	F5H6W4|Q9H992|Q9H992-2	E3 ubiquitin-protein ligase MARCH7 OS=Homo sapiens GN=MARCH7 PE=1 SV=1|Isoform 2 of E3 ubiquitin-protein ligase MARCH7 OS=Homo sapiens GN=MARCH7	-0.000458033	0.996902	0.998488	no hit	FALSE
FANCG	O15287	Fanconi anemia group G protein OS=Homo sapiens GN=FANCG PE=1 SV=1	-0.000602511	0.996687	0.998488	no hit	FALSE
SKA1	Q96BD8	Spindle and kinetochore-associated protein 1 OS=Homo sapiens GN=SKA1 PE=1 SV=1	-0.000779989	0.995298	0.997919	no hit	FALSE
PPIL2	Q13356|Q13356-2	Isoform 2 of Peptidyl-prolyl cis-trans isomerase-like 2 OS=Homo sapiens GN=PPIL2|Peptidyl-prolyl cis-trans isomerase-like 2 OS=Homo sapiens GN=PPIL2 PE=1 SV=1	-0.000817164	0.993064	0.997182	no hit	FALSE
RPS6	P62753	40S ribosomal protein S6 OS=Homo sapiens GN=RPS6 PE=1 SV=1	-0.00106665	0.991551	0.996299	no hit	FALSE
ARPC1A	Q92747	Actin-related protein 2/3 complex subunit 1A OS=Homo sapiens GN=ARPC1A PE=1 SV=2	-0.0013516	0.988174	0.995766	no hit	FALSE
LRRC40	Q9H9A6	Leucine-rich repeat-containing protein 40 OS=Homo sapiens GN=LRRC40 PE=1 SV=1	-0.00150039	0.985649	0.995133	no hit	FALSE
RBMX2	A0A087WUI1|Q9Y388	RNA-binding motif protein, X-linked 2 OS=Homo sapiens GN=RBMX2 PE=1 SV=1|RNA-binding motif protein, X-linked 2 OS=Homo sapiens GN=RBMX2 PE=1 SV=2	-0.0016985	0.986719	0.995574	no hit	FALSE
RHOT1	H7BXZ6|Q8IXI2|Q8IXI2-2|Q8IXI2-3|Q8IXI2-4|Q8IXI2-5|Q8IXI2-6|Q8IXI2-7	Isoform 2 of Mitochondrial Rho GTPase 1 OS=Homo sapiens GN=RHOT1|Isoform 3 of Mitochondrial Rho GTPase 1 OS=Homo sapiens GN=RHOT1|Isoform 4 of Mitochondrial Rho GTPase 1 OS=Homo sapiens GN=RHOT1|Isoform 5 of Mitochondrial Rho GTPase 1 OS=Homo sapiens GN=RHOT1|Isoform 6 of Mitochondrial Rho GTPase 1 OS=Homo sapiens GN=RHOT1|Isoform 7 of Mitochondrial Rho GTPase 1 OS=Homo sapiens GN=RHOT1|Mitochond…	-0.00171198	0.987687	0.995638	no hit	FALSE
EIF3L	B0QY89|Q9Y262|Q9Y262-2	Eukaryotic translation initiation factor 3 subunit L OS=Homo sapiens GN=EIF3L PE=1 SV=1|Isoform 2 of Eukaryotic translation initiation factor 3 subunit L OS=Homo sapiens GN=EIF3L	-0.00174583	0.984131	0.994782	no hit	FALSE
DCAF13	A0A087WT20|Q9NV06	DDB1- and CUL4-associated factor 13 OS=Homo sapiens GN=DCAF13 PE=1 SV=1|DDB1- and CUL4-associated factor 13 OS=Homo sapiens GN=DCAF13 PE=1 SV=2	-0.00175114	0.986172	0.995342	no hit	FALSE
SLC12A7	A0A0G2JNW7|Q9Y666	Solute carrier family 12 member 7 OS=Homo sapiens GN=SLC12A7 PE=1 SV=1|Solute carrier family 12 member 7 OS=Homo sapiens GN=SLC12A7 PE=1 SV=3	-0.00181888	0.988988	0.995948	no hit	FALSE
BHLHB9	Q6PI77	Protein BHLHb9 OS=Homo sapiens GN=BHLHB9 PE=2 SV=1	-0.00187962	0.987731	0.995638	no hit	FALSE
MCM2	H0Y8E6|P49736	DNA helicase (Fragment) OS=Homo sapiens GN=MCM2 PE=1 SV=1|DNA replication licensing factor MCM2 OS=Homo sapiens GN=MCM2 PE=1 SV=4	-0.00201385	0.980523	0.993142	no hit	FALSE
TROVE2	P10155|P10155-3|P10155-4|P10155-5	60 kDa SS-A/Ro ribonucleoprotein OS=Homo sapiens GN=TROVE2 PE=1 SV=2|Isoform 3 of 60 kDa SS-A/Ro ribonucleoprotein OS=Homo sapiens GN=TROVE2|Isoform 4 of 60 kDa SS-A/Ro ribonucleoprotein OS=Homo sapiens GN=TROVE2|Isoform 5 of 60 kDa SS-A/Ro ribonucleoprotein OS=Homo sapiens GN=TROVE2	-0.00221597	0.978901	0.991819	no hit	FALSE
CPVL	H7C0X5|Q9H3G5	Probable serine carboxypeptidase CPVL (Fragment) OS=Homo sapiens GN=CPVL PE=1 SV=1|Probable serine carboxypeptidase CPVL OS=Homo sapiens GN=CPVL PE=1 SV=2	-0.00222114	0.981003	0.993177	no hit	FALSE
AP1M1	Q9BXS5|Q9BXS5-2	AP-1 complex subunit mu-1 OS=Homo sapiens GN=AP1M1 PE=1 SV=3|Isoform 2 of AP-1 complex subunit mu-1 OS=Homo sapiens GN=AP1M1	-0.00244394	0.977739	0.99128	no hit	FALSE
AGL	P35573|P35573-2|P35573-3	Glycogen debranching enzyme OS=Homo sapiens GN=AGL PE=1 SV=3|Isoform 5 of Glycogen debranching enzyme OS=Homo sapiens GN=AGL|Isoform 6 of Glycogen debranching enzyme OS=Homo sapiens GN=AGL	-0.00286062	0.975276	0.990058	no hit	FALSE
GAPVD1	F8W9S7|Q14C86|Q14C86-2|Q14C86-3|Q14C86-4|Q14C86-5|Q14C86-6	GTPase-activating protein and VPS9 domain-containing protein 1 OS=Homo sapiens GN=GAPVD1 PE=1 SV=1|GTPase-activating protein and VPS9 domain-containing protein 1 OS=Homo sapiens GN=GAPVD1 PE=1 SV=2|Isoform 2 of GTPase-activating protein and VPS9 domain-containing protein 1 OS=Homo sapiens GN=GAPVD1|Isoform 3 of GTPase-activating protein and VPS9 domain-containing protein 1 OS=Homo sapiens GN=GAPV…	-0.00311387	0.98151	0.993183	no hit	FALSE
SLC16A1	P53985	Monocarboxylate transporter 1 OS=Homo sapiens GN=SLC16A1 PE=1 SV=3	-0.00345134	0.978054	0.99128	no hit	FALSE
G3BP2	Q9UN86|Q9UN86-2	Ras GTPase-activating protein-binding protein 2 OS=Homo sapiens GN=G3BP2 PE=1 SV=2|Isoform B of Ras GTPase-activating protein-binding protein 2 OS=Homo sapiens GN=G3BP2	-0.00355974	0.974533	0.989623	no hit	FALSE
RPL35A	C9K025|P18077	60S ribosomal protein L35a (Fragment) OS=Homo sapiens GN=RPL35A PE=1 SV=1|60S ribosomal protein L35a OS=Homo sapiens GN=RPL35A PE=1 SV=2	-0.00401372	0.969599	0.987544	no hit	FALSE
PFKP	Q01813	ATP-dependent 6-phosphofructokinase, platelet type OS=Homo sapiens GN=PFKP PE=1 SV=2	-0.00442721	0.967543	0.986342	no hit	FALSE
CDK2	G3V5T9|P24941|P24941-2	Cyclin-dependent kinase 2 OS=Homo sapiens GN=CDK2 PE=1 SV=1|Cyclin-dependent kinase 2 OS=Homo sapiens GN=CDK2 PE=1 SV=2|Isoform 2 of Cyclin-dependent kinase 2 OS=Homo sapiens GN=CDK2	-0.00444646	0.969663	0.987544	no hit	FALSE
DHX15	O43143	Pre-mRNA-splicing factor ATP-dependent RNA helicase DHX15 OS=Homo sapiens GN=DHX15 PE=1 SV=2	-0.00455413	0.960997	0.983172	no hit	FALSE
CYFIP2	E7EVJ5|H7C229|Q96F07|Q96F07-2	Cytoplasmic FMR1-interacting protein 2 OS=Homo sapiens GN=CYFIP2 PE=1 SV=1|Cytoplasmic FMR1-interacting protein 2 OS=Homo sapiens GN=CYFIP2 PE=1 SV=2|Isoform 2 of Cytoplasmic FMR1-interacting protein 2 OS=Homo sapiens GN=CYFIP2	-0.00494778	0.963316	0.984309	no hit	FALSE
FAR1	Q8WVX9	Fatty acyl-CoA reductase 1 OS=Homo sapiens GN=FAR1 PE=1 SV=1	-0.00500668	0.959976	0.982446	no hit	FALSE
UCKL1	Q9NWZ5|Q9NWZ5-2|Q9NWZ5-3|Q9NWZ5-4	Isoform 2 of Uridine-cytidine kinase-like 1 OS=Homo sapiens GN=UCKL1|Isoform 3 of Uridine-cytidine kinase-like 1 OS=Homo sapiens GN=UCKL1|Isoform 4 of Uridine-cytidine kinase-like 1 OS=Homo sapiens GN=UCKL1|Uridine-cytidine kinase-like 1 OS=Homo sapiens GN=UCKL1 PE=1 SV=2	-0.00515389	0.963359	0.984309	no hit	FALSE
BLVRA	P53004	Biliverdin reductase A OS=Homo sapiens GN=BLVRA PE=1 SV=2	-0.00526186	0.957734	0.981747	no hit	FALSE
MGA	Q8IWI9|Q8IWI9-3|Q8IWI9-4	MAX gene-associated protein OS=Homo sapiens GN=MGA PE=1 SV=3|Isoform 3 of MAX gene-associated protein OS=Homo sapiens GN=MGA|Isoform 4 of MAX gene-associated protein OS=Homo sapiens GN=MGA	-0.00534273	0.966245	0.985953	no hit	FALSE
DDX19A	I3L0H8|Q9NUU7	ATP-dependent RNA helicase DDX19A OS=Homo sapiens GN=DDX19A PE=1 SV=1|ATP-dependent RNA helicase DDX19A OS=Homo sapiens GN=DDX19A PE=1 SV=1	-0.00541779	0.955143	0.981224	no hit	FALSE
UBLCP1	Q8WVY7	Ubiquitin-like domain-containing CTD phosphatase 1 OS=Homo sapiens GN=UBLCP1 PE=1 SV=2	-0.00550408	0.976284	0.990443	no hit	FALSE
DHX36	Q9H2U1|Q9H2U1-2|Q9H2U1-3	ATP-dependent RNA helicase DHX36 OS=Homo sapiens GN=DHX36 PE=1 SV=2|Isoform 2 of ATP-dependent RNA helicase DHX36 OS=Homo sapiens GN=DHX36|Isoform 3 of ATP-dependent RNA helicase DHX36 OS=Homo sapiens GN=DHX36	-0.00563299	0.942525	0.974727	no hit	FALSE
TRIP11	H0YJ97|Q15643	Thyroid receptor-interacting protein 11 (Fragment) OS=Homo sapiens GN=TRIP11 PE=1 SV=1|Thyroid receptor-interacting protein 11 OS=Homo sapiens GN=TRIP11 PE=1 SV=3	-0.00577067	0.962501	0.984309	no hit	FALSE
ARHGEF2	Q92974|Q92974-2|Q92974-3|V9GYM8	Rho guanine nucleotide exchange factor 2 OS=Homo sapiens GN=ARHGEF2 PE=1 SV=4|Isoform 2 of Rho guanine nucleotide exchange factor 2 OS=Homo sapiens GN=ARHGEF2|Isoform 3 of Rho guanine nucleotide exchange factor 2 OS=Homo sapiens GN=ARHGEF2|Rho guanine nucleotide exchange factor 2 OS=Homo sapiens GN=ARHGEF2 PE=1 SV=1	-0.00590334	0.9555	0.981224	no hit	FALSE
WDR1	O75083	WD repeat-containing protein 1 OS=Homo sapiens GN=WDR1 PE=1 SV=4	-0.0065361	0.939215	0.973522	no hit	FALSE
MED23	Q5JWT2|Q9ULK4|Q9ULK4-2|Q9ULK4-3|Q9ULK4-4|Q9ULK4-5	Isoform 2 of Mediator of RNA polymerase II transcription subunit 23 OS=Homo sapiens GN=MED23|Isoform 3 of Mediator of RNA polymerase II transcription subunit 23 OS=Homo sapiens GN=MED23|Isoform 4 of Mediator of RNA polymerase II transcription subunit 23 OS=Homo sapiens GN=MED23|Isoform 5 of Mediator of RNA polymerase II transcription subunit 23 OS=Homo sapiens GN=MED23|Mediator of RNA polymerase …	-0.00670352	0.964275	0.984925	no hit	FALSE
NUP93	H3BVG0|Q8N1F7	Nuclear pore complex protein Nup93 OS=Homo sapiens GN=NUP93 PE=1 SV=1|Nuclear pore complex protein Nup93 OS=Homo sapiens GN=NUP93 PE=1 SV=2	-0.00686332	0.936685	0.97251	no hit	FALSE
APAF1	C9JLV4|O14727|O14727-2|O14727-3|O14727-4|O14727-5	Apoptotic protease-activating factor 1 OS=Homo sapiens GN=APAF1 PE=1 SV=1|Apoptotic protease-activating factor 1 OS=Homo sapiens GN=APAF1 PE=1 SV=2|Isoform 2 of Apoptotic protease-activating factor 1 OS=Homo sapiens GN=APAF1|Isoform 3 of Apoptotic protease-activating factor 1 OS=Homo sapiens GN=APAF1|Isoform 4 of Apoptotic protease-activating factor 1 OS=Homo sapiens GN=APAF1|Isoform 5 of Apoptot…	-0.00704818	0.946606	0.97666	no hit	FALSE
BECN1	E7EV84|K7ELY9|Q14457	Beclin-1 OS=Homo sapiens GN=BECN1 PE=1 SV=1|Beclin-1 (Fragment) OS=Homo sapiens GN=BECN1 PE=1 SV=1|Beclin-1 OS=Homo sapiens GN=BECN1 PE=1 SV=2	-0.00720185	0.949544	0.978276	no hit	FALSE
ATP11C	A0A067XG54|Q8NB49|Q8NB49-2|Q8NB49-3|Q8NB49-4	Isoform 2 of Phospholipid-transporting ATPase IG OS=Homo sapiens GN=ATP11C|Isoform 3 of Phospholipid-transporting ATPase IG OS=Homo sapiens GN=ATP11C|Isoform 4 of Phospholipid-transporting ATPase IG OS=Homo sapiens GN=ATP11C|Phospholipid-transporting ATPase IG OS=Homo sapiens GN=ATP11C PE=1 SV=3|Phospholipid-transporting ATPase OS=Homo sapiens GN=ATP11C PE=1 SV=1	-0.00722507	0.937292	0.97251	no hit	FALSE
ATG9A	Q7Z3C6|Q7Z3C6-2	Autophagy-related protein 9A OS=Homo sapiens GN=ATG9A PE=1 SV=3|Isoform 2 of Autophagy-related protein 9A OS=Homo sapiens GN=ATG9A	-0.00745497	0.934158	0.970921	no hit	FALSE
CTTN	Q14247	Src substrate cortactin OS=Homo sapiens GN=CTTN PE=1 SV=2	-0.00746013	0.949686	0.978276	no hit	FALSE
BRIX1	Q8TDN6	Ribosome biogenesis protein BRX1 homolog OS=Homo sapiens GN=BRIX1 PE=1 SV=2	-0.00749741	0.957533	0.981747	no hit	FALSE
MON2	F8VZV1|Q7Z3U7|Q7Z3U7-2|Q7Z3U7-5|Q7Z3U7-6	Isoform 2 of Protein MON2 homolog OS=Homo sapiens GN=MON2|Isoform 5 of Protein MON2 homolog OS=Homo sapiens GN=MON2|Isoform 6 of Protein MON2 homolog OS=Homo sapiens GN=MON2|Protein MON2 homolog OS=Homo sapiens GN=MON2 PE=1 SV=1|Protein MON2 homolog OS=Homo sapiens GN=MON2 PE=1 SV=3	-0.00788529	0.954009	0.980803	no hit	FALSE
ABCF2	Q9UG63|Q9UG63-2	ATP-binding cassette sub-family F member 2 OS=Homo sapiens GN=ABCF2 PE=1 SV=2|Isoform 2 of ATP-binding cassette sub-family F member 2 OS=Homo sapiens GN=ABCF2	-0.00798096	0.93009	0.969511	no hit	FALSE
TPGS1	Q6ZTW0|Q6ZTW0-2	Isoform 2 of Tubulin polyglutamylase complex subunit 1 OS=Homo sapiens GN=TPGS1|Tubulin polyglutamylase complex subunit 1 OS=Homo sapiens GN=TPGS1 PE=1 SV=2	-0.00826409	0.956059	0.981309	no hit	FALSE
C14orf80	Q86SX3|Q86SX3-2|Q86SX3-6	Uncharacterized protein C14orf80 OS=Homo sapiens GN=C14orf80 PE=2 SV=2|Isoform 2 of Uncharacterized protein C14orf80 OS=Homo sapiens GN=C14orf80|Isoform 6 of Uncharacterized protein C14orf80 OS=Homo sapiens GN=C14orf80	-0.00829614	0.971169	0.987834	no hit	FALSE
CKAP5	Q14008|Q14008-2|Q14008-3	Cytoskeleton-associated protein 5 OS=Homo sapiens GN=CKAP5 PE=1 SV=3|Isoform 2 of Cytoskeleton-associated protein 5 OS=Homo sapiens GN=CKAP5|Isoform 3 of Cytoskeleton-associated protein 5 OS=Homo sapiens GN=CKAP5	-0.00857474	0.948259	0.977766	no hit	FALSE
ARHGAP1	H0YE29|Q07960	Rho GTPase-activating protein 1 (Fragment) OS=Homo sapiens GN=ARHGAP1 PE=1 SV=1|Rho GTPase-activating protein 1 OS=Homo sapiens GN=ARHGAP1 PE=1 SV=1	-0.00862575	0.943363	0.974953	no hit	FALSE
TRIM26	Q12899	Tripartite motif-containing protein 26 OS=Homo sapiens GN=TRIM26 PE=1 SV=1	-0.00863124	0.953881	0.980803	enriched no hit	FALSE
IGF2BP3	O00425	Insulin-like growth factor 2 mRNA-binding protein 3 OS=Homo sapiens GN=IGF2BP3 PE=1 SV=2	-0.00879069	0.921195	0.964494	no hit	FALSE
NAGLU	P54802	Alpha-N-acetylglucosaminidase OS=Homo sapiens GN=NAGLU PE=1 SV=2	-0.00909879	0.943808	0.975093	no hit	FALSE
C18orf21	K7EM84|L7N2F3|Q32NC0|Q32NC0-2	UPF0711 protein C18orf21 (Fragment) OS=Homo sapiens GN=C18orf21 PE=1 SV=7|UPF0711 protein C18orf21 (Fragment) OS=Homo sapiens GN=C18orf21 PE=1 SV=7|UPF0711 protein C18orf21 OS=Homo sapiens GN=C18orf21 PE=1 SV=1|Isoform 2 of UPF0711 protein C18orf21 OS=Homo sapiens GN=C18orf21	-0.00969326	0.933864	0.970921	no hit	FALSE
OCRL	Q01968|Q01968-2	Inositol polyphosphate 5-phosphatase OCRL-1 OS=Homo sapiens GN=OCRL PE=1 SV=3|Isoform B of Inositol polyphosphate 5-phosphatase OCRL-1 OS=Homo sapiens GN=OCRL	-0.0101327	0.913053	0.961301	no hit	FALSE
GTPBP4	Q9BZE4	Nucleolar GTP-binding protein 1 OS=Homo sapiens GN=GTPBP4 PE=1 SV=3	-0.0102547	0.927681	0.968925	no hit	FALSE
JMJD4	A0A087WT84|Q9H9V9|Q9H9V9-2	JmjC domain-containing protein 4 OS=Homo sapiens GN=JMJD4 PE=1 SV=1|JmjC domain-containing protein 4 OS=Homo sapiens GN=JMJD4 PE=1 SV=2|Isoform 2 of JmjC domain-containing protein 4 OS=Homo sapiens GN=JMJD4	-0.0106816	0.959958	0.982446	no hit	FALSE
DDX24	G3V529|Q9GZR7	ATP-dependent RNA helicase DDX24 OS=Homo sapiens GN=DDX24 PE=1 SV=1|ATP-dependent RNA helicase DDX24 OS=Homo sapiens GN=DDX24 PE=1 SV=1	-0.0110048	0.921269	0.964494	no hit	FALSE
AP3B1	O00203|O00203-3	AP-3 complex subunit beta-1 OS=Homo sapiens GN=AP3B1 PE=1 SV=3|Isoform 2 of AP-3 complex subunit beta-1 OS=Homo sapiens GN=AP3B1	-0.0112856	0.903158	0.956194	no hit	FALSE
HNRNPH2	P55795	Heterogeneous nuclear ribonucleoprotein H2 OS=Homo sapiens GN=HNRNPH2 PE=1 SV=1	-0.0113505	0.915237	0.961681	no hit	FALSE
VANGL1	Q8TAA9|Q8TAA9-2	Vang-like protein 1 OS=Homo sapiens GN=VANGL1 PE=1 SV=1|Isoform 2 of Vang-like protein 1 OS=Homo sapiens GN=VANGL1	-0.0117574	0.929224	0.969425	no hit	FALSE
KLHL8	Q9P2G9|Q9P2G9-2	Isoform 2 of Kelch-like protein 8 OS=Homo sapiens GN=KLHL8|Kelch-like protein 8 OS=Homo sapiens GN=KLHL8 PE=1 SV=4	-0.0122348	0.932628	0.970774	no hit	FALSE
FARP2	H7C3M7|O94887|O94887-2|O94887-3	FERM, RhoGEF and pleckstrin domain-containing protein 2 (Fragment) OS=Homo sapiens GN=FARP2 PE=1 SV=2|FERM, RhoGEF and pleckstrin domain-containing protein 2 OS=Homo sapiens GN=FARP2 PE=1 SV=3|Isoform 2 of FERM, RhoGEF and pleckstrin domain-containing protein 2 OS=Homo sapiens GN=FARP2|Isoform 3 of FERM, RhoGEF and pleckstrin domain-containing protein 2 OS=Homo sapiens GN=FARP2	-0.0123256	0.903474	0.956194	no hit	FALSE
CAPRIN1	Q14444|Q14444-2	Caprin-1 OS=Homo sapiens GN=CAPRIN1 PE=1 SV=2|Isoform 2 of Caprin-1 OS=Homo sapiens GN=CAPRIN1	-0.0124192	0.952848	0.98025	no hit	FALSE
PLRG1	O43660|O43660-2	Isoform 2 of Pleiotropic regulator 1 OS=Homo sapiens GN=PLRG1|Pleiotropic regulator 1 OS=Homo sapiens GN=PLRG1 PE=1 SV=1	-0.0124971	0.91949	0.964494	no hit	FALSE
DNAJC11	Q9NVH1|Q9NVH1-3	DnaJ homolog subfamily C member 11 OS=Homo sapiens GN=DNAJC11 PE=1 SV=2|Isoform 3 of DnaJ homolog subfamily C member 11 OS=Homo sapiens GN=DNAJC11	-0.0125424	0.926775	0.9683	no hit	FALSE
OSBPL8	F8VQX7|Q9BZF1|Q9BZF1-2|Q9BZF1-3	Isoform 2 of Oxysterol-binding protein-related protein 8 OS=Homo sapiens GN=OSBPL8|Isoform 3 of Oxysterol-binding protein-related protein 8 OS=Homo sapiens GN=OSBPL8|Oxysterol-binding protein-related protein 8 OS=Homo sapiens GN=OSBPL8 PE=1 SV=3|Oxysterol-binding protein (Fragment) OS=Homo sapiens GN=OSBPL8 PE=1 SV=1	-0.0125674	0.922179	0.964779	no hit	FALSE
CCNB1	E9PC90|P14635	G2/mitotic-specific cyclin-B1 (Fragment) OS=Homo sapiens GN=CCNB1 PE=1 SV=1|G2/mitotic-specific cyclin-B1 OS=Homo sapiens GN=CCNB1 PE=1 SV=1	-0.0128665	0.896405	0.953934	no hit	FALSE
NOL6	A0A0A0MRW6|Q9H6R4|Q9H6R4-2|Q9H6R4-3|Q9H6R4-4	Isoform 2 of Nucleolar protein 6 OS=Homo sapiens GN=NOL6|Isoform 3 of Nucleolar protein 6 OS=Homo sapiens GN=NOL6|Isoform 4 of Nucleolar protein 6 OS=Homo sapiens GN=NOL6|Nucleolar protein 6 OS=Homo sapiens GN=NOL6 PE=1 SV=1|Nucleolar protein 6 OS=Homo sapiens GN=NOL6 PE=1 SV=2	-0.0128844	0.898795	0.953947	no hit	FALSE
NASP	P49321|P49321-3	Isoform 3 of Nuclear autoantigenic sperm protein OS=Homo sapiens GN=NASP|Nuclear autoantigenic sperm protein OS=Homo sapiens GN=NASP PE=1 SV=2	-0.0133396	0.936199	0.972454	no hit	FALSE
C11orf49	Q9H6J7|Q9H6J7-2|Q9H6J7-3|Q9H6J7-4	UPF0705 protein C11orf49 OS=Homo sapiens GN=C11orf49 PE=1 SV=2|Isoform 2 of UPF0705 protein C11orf49 OS=Homo sapiens GN=C11orf49|Isoform 3 of UPF0705 protein C11orf49 OS=Homo sapiens GN=C11orf49|Isoform 4 of UPF0705 protein C11orf49 OS=Homo sapiens GN=C11orf49	-0.0135036	0.97599	0.990443	no hit	FALSE
RNF20	Q5VTR2	E3 ubiquitin-protein ligase BRE1A OS=Homo sapiens GN=RNF20 PE=1 SV=2	-0.0136685	0.930036	0.969511	no hit	FALSE
TMX2	Q9Y320|Q9Y320-2	Thioredoxin-related transmembrane protein 2 OS=Homo sapiens GN=TMX2 PE=1 SV=1|Isoform 2 of Thioredoxin-related transmembrane protein 2 OS=Homo sapiens GN=TMX2	-0.0138362	0.897743	0.953934	no hit	FALSE
WDR70	Q9NW82	WD repeat-containing protein 70 OS=Homo sapiens GN=WDR70 PE=1 SV=1	-0.0138421	0.920581	0.964494	no hit	FALSE
ATXN2L	Q8WWM7|Q8WWM7-2|Q8WWM7-3|Q8WWM7-4|Q8WWM7-5|Q8WWM7-6|Q8WWM7-8|Q8WWM7-9	Ataxin-2-like protein OS=Homo sapiens GN=ATXN2L PE=1 SV=2|Isoform 2 of Ataxin-2-like protein OS=Homo sapiens GN=ATXN2L|Isoform 3 of Ataxin-2-like protein OS=Homo sapiens GN=ATXN2L|Isoform 4 of Ataxin-2-like protein OS=Homo sapiens GN=ATXN2L|Isoform 5 of Ataxin-2-like protein OS=Homo sapiens GN=ATXN2L|Isoform 6 of Ataxin-2-like protein OS=Homo sapiens GN=ATXN2L|Isoform 8 of Ataxin-2-like protein O…	-0.0138534	0.911538	0.960154	no hit	FALSE
PRPF6	O94906|O94906-2	Isoform 2 of Pre-mRNA-processing factor 6 OS=Homo sapiens GN=PRPF6|Pre-mRNA-processing factor 6 OS=Homo sapiens GN=PRPF6 PE=1 SV=1	-0.0140429	0.865874	0.948817	no hit	FALSE
SRPRB	Q9Y5M8	Signal recognition particle receptor subunit beta OS=Homo sapiens GN=SRPRB PE=1 SV=3	-0.0143975	0.884527	0.951123	no hit	FALSE
P3H1	Q32P28|Q32P28-3|Q32P28-4	Isoform 3 of Prolyl 3-hydroxylase 1 OS=Homo sapiens GN=P3H1|Isoform 4 of Prolyl 3-hydroxylase 1 OS=Homo sapiens GN=P3H1|Prolyl 3-hydroxylase 1 OS=Homo sapiens GN=P3H1 PE=1 SV=2	-0.0146736	0.885861	0.951123	no hit	FALSE
KCTD3	Q9Y597	BTB/POZ domain-containing protein KCTD3 OS=Homo sapiens GN=KCTD3 PE=1 SV=2	-0.0146834	0.882422	0.951123	no hit	FALSE
PSMG1	O95456|O95456-2	Proteasome assembly chaperone 1 OS=Homo sapiens GN=PSMG1 PE=1 SV=1|Isoform 2 of Proteasome assembly chaperone 1 OS=Homo sapiens GN=PSMG1	-0.014775	0.877647	0.951123	no hit	FALSE
MCM9	Q9NXL9|Q9NXL9-4	DNA helicase MCM9 OS=Homo sapiens GN=MCM9 PE=1 SV=4|Isoform 4 of DNA helicase MCM9 OS=Homo sapiens GN=MCM9	-0.0148927	0.892772	0.953934	no hit	FALSE
CHD1	A0A087WVF4|O14646|O14646-2	Chromodomain-helicase-DNA-binding protein 1 (Fragment) OS=Homo sapiens GN=CHD1 PE=1 SV=1|Chromodomain-helicase-DNA-binding protein 1 OS=Homo sapiens GN=CHD1 PE=1 SV=2|Isoform 2 of Chromodomain-helicase-DNA-binding protein 1 OS=Homo sapiens GN=CHD1	-0.0151385	0.886657	0.95153	no hit	FALSE
GSK3B	P49841|P49841-2	Glycogen synthase kinase-3 beta OS=Homo sapiens GN=GSK3B PE=1 SV=2|Isoform 2 of Glycogen synthase kinase-3 beta OS=Homo sapiens GN=GSK3B	-0.0151399	0.874598	0.951123	no hit	FALSE
ABHD2	P08910	Monoacylglycerol lipase ABHD2 OS=Homo sapiens GN=ABHD2 PE=1 SV=1	-0.0153239	0.896549	0.953934	no hit	FALSE
RANBP1	F6WQW2|P43487|P43487-2	Isoform 2 of Ran-specific GTPase-activating protein OS=Homo sapiens GN=RANBP1|Ran-specific GTPase-activating protein OS=Homo sapiens GN=RANBP1 PE=1 SV=1	-0.015655	0.923539	0.96556	no hit	FALSE
MLLT4	A8MQ02|J3KN01|P55196|P55196-3|P55196-5	Afadin OS=Homo sapiens GN=MLLT4 PE=1 SV=1|Afadin OS=Homo sapiens GN=MLLT4 PE=1 SV=2|Afadin OS=Homo sapiens GN=MLLT4 PE=1 SV=3|Isoform 3 of Afadin OS=Homo sapiens GN=MLLT4|Isoform 5 of Afadin OS=Homo sapiens GN=MLLT4	-0.0158966	0.901224	0.955237	no hit	FALSE
KIF7	Q2M1P5	Kinesin-like protein KIF7 OS=Homo sapiens GN=KIF7 PE=1 SV=2	-0.0159189	0.921014	0.964494	no hit	FALSE
NSD1	Q96L73|Q96L73-2|Q96L73-3	Histone-lysine N-methyltransferase, H3 lysine-36 and H4 lysine-20 specific OS=Homo sapiens GN=NSD1 PE=1 SV=1|Isoform 2 of Histone-lysine N-methyltransferase, H3 lysine-36 and H4 lysine-20 specific OS=Homo sapiens GN=NSD1|Isoform 3 of Histone-lysine N-methyltransferase, H3 lysine-36 and H4 lysine-20 specific OS=Homo sapiens GN=NSD1	-0.0160226	0.880655	0.951123	no hit	FALSE
SIN3A	Q96ST3	Paired amphipathic helix protein Sin3a OS=Homo sapiens GN=SIN3A PE=1 SV=2	-0.0161266	0.858646	0.948094	no hit	FALSE
ZNF24	P17028	Zinc finger protein 24 OS=Homo sapiens GN=ZNF24 PE=1 SV=4	-0.0163191	0.890951	0.953934	no hit	FALSE
RPL37	P61927	60S ribosomal protein L37 OS=Homo sapiens GN=RPL37 PE=1 SV=2	-0.0163925	0.880303	0.951123	no hit	FALSE
PSPC1	Q8WXF1|Q8WXF1-2|X6RDA4	Isoform 2 of Paraspeckle component 1 OS=Homo sapiens GN=PSPC1|Paraspeckle component 1 (Fragment) OS=Homo sapiens GN=PSPC1 PE=1 SV=1|Paraspeckle component 1 OS=Homo sapiens GN=PSPC1 PE=1 SV=1	-0.0166779	0.887519	0.951928	no hit	FALSE
MDN1	Q9NU22	Midasin OS=Homo sapiens GN=MDN1 PE=1 SV=2	-0.0170562	0.851734	0.947305	no hit	FALSE
GSPT1	H3BR35|P15170|P15170-2|P15170-3	Eukaryotic peptide chain release factor GTP-binding subunit ERF3A (Fragment) OS=Homo sapiens GN=GSPT1 PE=1 SV=1|Eukaryotic peptide chain release factor GTP-binding subunit ERF3A OS=Homo sapiens GN=GSPT1 PE=1 SV=1|Isoform 2 of Eukaryotic peptide chain release factor GTP-binding subunit ERF3A OS=Homo sapiens GN=GSPT1|Isoform 3 of Eukaryotic peptide chain release factor GTP-binding subunit ERF3A OS=…	-0.0172418	0.897595	0.953934	no hit	FALSE
PRKCA	P17252	Protein kinase C alpha type OS=Homo sapiens GN=PRKCA PE=1 SV=4	-0.01736	0.861234	0.948236	no hit	FALSE
RIOK2	Q9BVS4	Serine/threonine-protein kinase RIO2 OS=Homo sapiens GN=RIOK2 PE=1 SV=2	-0.0173947	0.884635	0.951123	no hit	FALSE
PABPC4	Q13310-2|Q13310-3	Isoform 2 of Polyadenylate-binding protein 4 OS=Homo sapiens GN=PABPC4|Isoform 3 of Polyadenylate-binding protein 4 OS=Homo sapiens GN=PABPC4	-0.0174026	0.909042	0.959646	no hit	FALSE
CLK2	B1AVT0|P49760|P49760-3	Dual-specificity protein kinase CLK2 OS=Homo sapiens GN=CLK2 PE=1 SV=1|Dual specificity protein kinase CLK2 OS=Homo sapiens GN=CLK2 PE=1 SV=1|Isoform 3 of Dual specificity protein kinase CLK2 OS=Homo sapiens GN=CLK2	-0.0174199	0.871319	0.95009	no hit	FALSE
NEK9	Q8TD19	Serine/threonine-protein kinase Nek9 OS=Homo sapiens GN=NEK9 PE=1 SV=2	-0.0174334	0.847192	0.946738	no hit	FALSE
WDR89	Q96FK6	WD repeat-containing protein 89 OS=Homo sapiens GN=WDR89 PE=2 SV=1	-0.0176102	0.864587	0.948817	no hit	FALSE
SF3B3	Q15393	Splicing factor 3B subunit 3 OS=Homo sapiens GN=SF3B3 PE=1 SV=4	-0.0177011	0.867158	0.948817	no hit	FALSE
PYGL	E9PK47|P06737|P06737-2	Alpha-1,4 glucan phosphorylase OS=Homo sapiens GN=PYGL PE=1 SV=1|Glycogen phosphorylase, liver form OS=Homo sapiens GN=PYGL PE=1 SV=4|Isoform 2 of Glycogen phosphorylase, liver form OS=Homo sapiens GN=PYGL	-0.0177114	0.854071	0.948094	no hit	FALSE
TELO2	Q9Y4R8	Telomere length regulation protein TEL2 homolog OS=Homo sapiens GN=TELO2 PE=1 SV=2	-0.0177193	0.902042	0.955782	no hit	FALSE
RBM15	A0A087WWP4|Q96T37|Q96T37-2|Q96T37-3|Q96T37-4	Putative RNA-binding protein 15 OS=Homo sapiens GN=RBM15 PE=1 SV=1|Putative RNA-binding protein 15 OS=Homo sapiens GN=RBM15 PE=1 SV=2|Isoform 2 of Putative RNA-binding protein 15 OS=Homo sapiens GN=RBM15|Isoform 3 of Putative RNA-binding protein 15 OS=Homo sapiens GN=RBM15|Isoform 4 of Putative RNA-binding protein 15 OS=Homo sapiens GN=RBM15	-0.017913	0.84883	0.947305	no hit	FALSE
WTAP	Q15007	Pre-mRNA-splicing regulator WTAP OS=Homo sapiens GN=WTAP PE=1 SV=2	-0.0180172	0.8597	0.948236	no hit	FALSE
PRR14L	Q5THK1	Protein PRR14L OS=Homo sapiens GN=PRR14L PE=1 SV=1	-0.018195	0.879506	0.951123	no hit	FALSE
WDR45B	Q5MNZ6	WD repeat domain phosphoinositide-interacting protein 3 OS=Homo sapiens GN=WDR45B PE=2 SV=2	-0.0182296	0.832893	0.941791	no hit	FALSE
RPL8	E9PKZ0|P62917	60S ribosomal protein L8 (Fragment) OS=Homo sapiens GN=RPL8 PE=1 SV=1|60S ribosomal protein L8 OS=Homo sapiens GN=RPL8 PE=1 SV=2	-0.0182559	0.861328	0.948236	no hit	FALSE
PYGB	P11216	Glycogen phosphorylase, brain form OS=Homo sapiens GN=PYGB PE=1 SV=5	-0.0184321	0.86275	0.948634	no hit	FALSE
MTPAP	Q9NVV4	Poly(A) RNA polymerase, mitochondrial OS=Homo sapiens GN=MTPAP PE=1 SV=1	-0.01859	0.871061	0.95009	no hit	FALSE
RPS14	P62263	40S ribosomal protein S14 OS=Homo sapiens GN=RPS14 PE=1 SV=3	-0.0186414	0.840885	0.944859	no hit	FALSE
ARHGDIA	J3KTF8|J3QQX2|P52565	Rho GDP-dissociation inhibitor 1 (Fragment) OS=Homo sapiens GN=ARHGDIA PE=1 SV=7|Rho GDP-dissociation inhibitor 1 OS=Homo sapiens GN=ARHGDIA PE=1 SV=1|Rho GDP-dissociation inhibitor 1 OS=Homo sapiens GN=ARHGDIA PE=1 SV=3	-0.0186562	0.89558	0.953934	no hit	FALSE
AP2A1	O95782|O95782-2	AP-2 complex subunit alpha-1 OS=Homo sapiens GN=AP2A1 PE=1 SV=3|Isoform B of AP-2 complex subunit alpha-1 OS=Homo sapiens GN=AP2A1	-0.0188369	0.837832	0.944073	no hit	FALSE
TFRC	P02786	Transferrin receptor protein 1 OS=Homo sapiens GN=TFRC PE=1 SV=2	-0.0190765	0.910098	0.959795	no hit	FALSE
EIF4G1	E7EUU4|E7EX73|E9PGM1|Q04637|Q04637-3|Q04637-4|Q04637-5|Q04637-6|Q04637-8|Q04637-9	Eukaryotic translation initiation factor 4 gamma 1 OS=Homo sapiens GN=EIF4G1 PE=1 SV=1|Eukaryotic translation initiation factor 4 gamma 1 OS=Homo sapiens GN=EIF4G1 PE=1 SV=4|Isoform 8 of Eukaryotic translation initiation factor 4 gamma 1 OS=Homo sapiens GN=EIF4G1|Isoform 9 of Eukaryotic translation initiation factor 4 gamma 1 OS=Homo sapiens GN=EIF4G1|Isoform B of Eukaryotic translation initiatio…	-0.019083	0.885602	0.951123	no hit	FALSE
RAB23	Q9ULC3	Ras-related protein Rab-23 OS=Homo sapiens GN=RAB23 PE=1 SV=1	-0.0190858	0.87462	0.951123	no hit	FALSE
PASK	Q96RG2|Q96RG2-2|Q96RG2-4	PAS domain-containing serine/threonine-protein kinase OS=Homo sapiens GN=PASK PE=1 SV=3|Isoform 2 of PAS domain-containing serine/threonine-protein kinase OS=Homo sapiens GN=PASK|Isoform 3 of PAS domain-containing serine/threonine-protein kinase OS=Homo sapiens GN=PASK	-0.0191013	0.859942	0.948236	no hit	FALSE
KEAP1	K7EJ49|K7EJD8|K7ESE0|Q14145	Kelch-like ECH-associated protein 1 (Fragment) OS=Homo sapiens GN=KEAP1 PE=1 SV=1|Kelch-like ECH-associated protein 1 (Fragment) OS=Homo sapiens GN=KEAP1 PE=1 SV=2|Kelch-like ECH-associated protein 1 OS=Homo sapiens GN=KEAP1 PE=1 SV=2	-0.0192373	0.882946	0.951123	no hit	FALSE
LCMT2	O60294	tRNA wybutosine-synthesizing protein 4 OS=Homo sapiens GN=LCMT2 PE=1 SV=3	-0.0194962	0.889771	0.953693	no hit	FALSE
MTCH1	H0Y8C3|Q9NZJ7|Q9NZJ7-2	Isoform 2 of Mitochondrial carrier homolog 1 OS=Homo sapiens GN=MTCH1|Mitochondrial carrier homolog 1 (Fragment) OS=Homo sapiens GN=MTCH1 PE=1 SV=1|Mitochondrial carrier homolog 1 OS=Homo sapiens GN=MTCH1 PE=1 SV=1	-0.0196037	0.893286	0.953934	no hit	FALSE
[truncated: 1,435 more rows]

## Sheet: TRIM2 selected
Related to Figure 2: Selected proteins of interest
gene_name	protein_id	description	log2FC(WT/dead)	p_value	fdr	hit_annotation	POI
[truncated: 29 more rows]

## Sheet: TRIM3 all
Quantitative MS in the identification of TRIM3 substrates
HEK 293-T cells were co-transfected with TRIM3 and ubiquitin. Substrates were enriched with streptavidin pull-downs.
[truncated: 3,499 more rows]

## Sheet: TRIM3 selected
Related to Figure 2: Selected proteins of interest
[truncated: 16 more rows]
