# Supplementary material for: Zinc-mediated regulation of TMEM106B function in the endolysosomal pathway revealed through the systematic identification of TRIM2/3 ubiquitination substrates
Source: Research Square preprint supplement (doi:10.21203/rs.3.rs-5037938/v1), 2024-09-30
Supplement: Supplementary file 3 [file c0fdb3045663ce6829440359.xlsx]

## Sheet: Description
Column name	Description
Protein name	Protein name
UniProt ID	Identifier for the UniProt database
Ubiquitination site	Amino acid position of the lysine residue containing the ubiquitin modification
Peptide	Peptide identified containing the ubiquitin modification
Best Localization Probability	Probability of localization from the best replicate
Best Intensity	Highest signal intensity from the best replicate

## Sheet: TRIM2 and TRIM3
Protein name	UniProt ID	Ubiquitination site	Peptide	Best Localization Probability	Best Intensity
TRIM2	Q9C040	174	ASLQVQLDAVNkR	1	31900000
TRIM2	Q9C041	213	ASIVDDIHSTFDELQkTLNVR;ASIVDDIHSTFDELQkTLNVRK	1	862000000
TRIM2	Q9C042	235	HkVLQSQLDTLLQGQESIK	0.9814	63900000
TRIM2	Q9C043	275	kQMSEKLNELADQDFPLHPR	0.9764	1980000000
TRIM2	Q9C044	280	QMSEkLNELADQDFPLHPR	1	53300000
TRIM2	Q9C045	310	ENDQLDFIVETEGLKk;kSIHNLGTILTTNAVASETVATGEGLR	1	144000000
TRIM2	Q9C046	351	QTIIGQPMSVTITTkDKDGELCK	0.8655	7762569
TRIM2	Q9C047	420	GSPFKLkVIR	0.9602	221000000
TRIM2	Q9C048	435	SADVSPTTEGVkR;SADVSPTTEGVkRR	1	2570000000
TRIM2	Q9C049	439	RVkSPGSGHVK;RVkSPGSGHVkQK;VkSPGSGHVK;VkSPGSGHVkQK	0.9823	204000000
TRIM2	Q9C050	447	RVkSPGSGHVkQK;SPGSGHVkQK;VkSPGSGHVkQK	0.9177	36000000
TRIM2	Q9C051	449	SPGSGHVKQkAVK	0.9581	4461192
TRIM2	Q9C052	452	AVkRPASMYSTGK;AVkRPASMYSTGkR;QKAVkRPASMYSTGK	1	290000000
TRIM2	Q9C053	462	AVKRPASMYSTGkR;AVkRPASMYSTGkR;RPASMYSTGkR	1	279000000
TRIM2	Q9C054	464	RkENPIEDDLIFR	1	1260000000
TRIM2	Q9C055	483	GRNkGEFTNLQGVAASTNGK;NkGEFTNLQGVAASTNGK;NkGEFTNLQGVAASTNGKILIADSNNQCVQIFSNDGQFK	0.9782	108000000
TRIM2	Q9C056	574	IGSGkLMGPK	0.9742	47300000
TRIM2	Q9C057	607	GVSVDRNGHIIVVDNKACCVFIFQPNGkIVTR;NGHIIVVDNKACCVFIFQPNGkIVTR	0.9805	7293356
TRIM2	Q9C058	72	QTSILPEkGVAALQNNFFITNLMDVLQR	1	53700000
Protein name	UniProt ID	Ubiquitination site	Peptide	Best Localization Probability	Best Intensity
TRIM3	O75382	232	QkVLQSQLDTLR	1	328000000
TRIM3	O75383	348	QALVGQPASLTVTTkDKDGR	0.8236	2745613
TRIM3	O75384	432	ALRPGDLPPSPDDVkR;ALRPGDLPPSPDDVkRR	1	48000000
TRIM3	O75385	436	RVkSPGGPGSHVR;VkSPGGPGSHVR	1	19600000
TRIM3	O75386	462	RPSSMYSTGGkR	1	17500000
TRIM3	O75387	464	RkDNPIEDELVFR;kDNPIEDELVFR	1	26600000
TRIM3	O75388	483	EkGEFTNLQGVSAASSGR;GREkGEFTNLQGVSAASSGR	1	60600000

## Sheet: TMEM106B
Protein name	UniProt ID	Ubiquitination site	Peptide	Localization Probability	Intensity
TMEM106B (1-95)	Q9NUM4	3	GkSLSHLPLHSSkEDAYDGVTSENMR;MGkSLSHLPLHSSKEDAYDGVTSENMR;MGkSLSHLPLHSSKEDAYDGVTSENMRNGLVNSEVHNEDGR;MGkSLSHLPLHSSkEDAYDGVTSENMR	1	67886010
TMEM106B (1-95)	Q9NUM4	14	GkSLSHLPLHSSkEDAYDGVTSENMR;MGKSLSHLPLHSSkEDAYDGVTSENMR;MGkSLSHLPLHSSkEDAYDGVTSENMR;SLSHLPLHSSkEDAYDGVTSENMR;SLSHLPLHSSkEDAYDGVTSENMRNGLVNSEVHNEDGR	1	504029570
